# Supplementary material
Source: ML conference proceedings conference paper supplement (https://aclanthology.org/2021.findings-acl.166)
Supplement: OptionalSupplementaryMaterial [file 2021.findings-acl.166.OptionalSupplementaryMaterial.zip]

Archive with 99 entries (77 files):
- acl_supplement/
- acl_supplement/data/
- acl_supplement/data/Dataset/
- acl_supplement/data/Dataset/Annotation Codebook.pdf
- acl_supplement/data/Dataset/content_warning.txt
- acl_supplement/data/Dataset/DataSplits.csv
- acl_supplement/data/Dataset/Final_Dog_Whistle_5k.pkl
- acl_supplement/data/Dataset/search_terms.txt
- acl_supplement/data/Results/
- acl_supplement/data/Results/Image/
- acl_supplement/data/Results/Image/InceptionResNetV2/
- acl_supplement/data/Results/Image/InceptionResNetV2/InceptionResNetV2_dogwhistle_predictions.csv
- acl_supplement/data/Results/Image/InceptionResNetV2/InceptionResNetV2_dogwhistle_test_results_multimodal.npy
- acl_supplement/data/Results/Image/InceptionResNetV2/InceptionResNetV2_dogwhistle_test_results_unimodal.npy
- acl_supplement/data/Results/Image/InceptionResNetV2/InceptionResNetV2_dogwhistle_train_results.npy
- acl_supplement/data/Results/Image/NASNet/
- acl_supplement/data/Results/Image/NASNet/NASNet_dogwhistle_predictions.csv
- acl_supplement/data/Results/Image/NASNet/NASNet_dogwhistle_test_results_multimodal.npy
- acl_supplement/data/Results/Image/NASNet/NASNet_dogwhistle_test_results_unimodal.npy
- acl_supplement/data/Results/Image/NASNet/NASNet_dogwhistle_train_results.npy
- acl_supplement/data/Results/Image/Xception/
- acl_supplement/data/Results/Image/Xception/Xception_dogwhistle_predictions.csv
- acl_supplement/data/Results/Image/Xception/Xception_dogwhistle_test_results_multimodal.npy
- acl_supplement/data/Results/Image/Xception/Xception_dogwhistle_test_results_unimodal.npy
- acl_supplement/data/Results/Image/Xception/Xception_dogwhistle_train_results.npy
- acl_supplement/data/Results/Model_Predictions.csv
- acl_supplement/data/Results/Multimodal/
- acl_supplement/data/Results/Multimodal/Feature Concatenation/
- acl_supplement/data/Results/Multimodal/Feature Concatenation/Gomez/
- acl_supplement/data/Results/Multimodal/Feature Concatenation/Gomez/dogwhistle_total_training_results_gomez.npy
- acl_supplement/data/Results/Multimodal/Feature Concatenation/Gomez/Gomez_dogwhistle_predictions.csv
- acl_supplement/data/Results/Multimodal/Feature Concatenation/Gomez/Gomez_dogwhistle_test_results.npy
- acl_supplement/data/Results/Multimodal/Feature Concatenation/Gomez/Gomez_dogwhistle_train_results.npy
- acl_supplement/data/Results/Multimodal/Feature Concatenation/Sabat/
- acl_supplement/data/Results/Multimodal/Feature Concatenation/Sabat/dogwhistle_total_training_results_sabat.npy
- acl_supplement/data/Results/Multimodal/Feature Concatenation/Sabat/Sabat_dogwhistle_predictions.csv
- acl_supplement/data/Results/Multimodal/Feature Concatenation/Sabat/Sabat_dogwhistle_test_results.npy
- acl_supplement/data/Results/Multimodal/Feature Concatenation/Sabat/Sabat_dogwhistle_train_results.npy
- acl_supplement/data/Results/Multimodal/MMBT/
- acl_supplement/data/Results/Multimodal/MMBT/.ipynb_checkpoints/
- acl_supplement/data/Results/Multimodal/MMBT/config.json
- acl_supplement/data/Results/Multimodal/MMBT/predictions.csv
- acl_supplement/data/Results/Multimodal/MMBT/results.npy
- acl_supplement/data/Results/Multimodal/MMBT/special_tokens_map.json
- acl_supplement/data/Results/Multimodal/MMBT/tokenizer_config.json
- acl_supplement/data/Results/Multimodal/MMBT/training_args.bin
- acl_supplement/data/Results/Multimodal/MMBT/vocab.txt
- acl_supplement/data/Results/Text/
- acl_supplement/data/Results/Text/AlBERT/
- acl_supplement/data/Results/Text/AlBERT/AlBERT_dogwhistle_predictions.csv
- acl_supplement/data/Results/Text/AlBERT/AlBERT_dogwhistle_test_results.npy
- acl_supplement/data/Results/Text/AlBERT/AlBERT_dogwhistle_train_results.npy
- acl_supplement/data/Results/Text/AlBERT/config.json
- acl_supplement/data/Results/Text/AlBERT/special_tokens_map.json
- acl_supplement/data/Results/Text/AlBERT/spiece.model
- acl_supplement/data/Results/Text/AlBERT/tokenizer_config.json
- acl_supplement/data/Results/Text/BERT/
- acl_supplement/data/Results/Text/BERT/BERT_dogwhistle_predictions.csv
- acl_supplement/data/Results/Text/BERT/BERT_dogwhistle_test_results.npy
- acl_supplement/data/Results/Text/BERT/BERT_dogwhistle_train_results.npy
- acl_supplement/data/Results/Text/BERT/config.json
- acl_supplement/data/Results/Text/BERT/special_tokens_map.json
- acl_supplement/data/Results/Text/BERT/tokenizer_config.json
- acl_supplement/data/Results/Text/BERT/tweet_length_distribution.png
- acl_supplement/data/Results/Text/BERT/vocab.txt
- acl_supplement/data/Results/Text/Electra/
- acl_supplement/data/Results/Text/Electra/config.json
- acl_supplement/data/Results/Text/Electra/Electra_dogwhistle_predictions.csv
- acl_supplement/data/Results/Text/Electra/Electra_dogwhistle_test_results.npy
- acl_supplement/data/Results/Text/Electra/Electra_dogwhistle_train_results.npy
- acl_supplement/data/Results/Text/Electra/special_tokens_map.json
- acl_supplement/data/Results/Text/Electra/tokenizer_config.json
- acl_supplement/data/Results/Text/Electra/vocab.txt
- acl_supplement/data/Results/Text/LSTM/
- acl_supplement/data/Results/Text/LSTM/.vector_cache/
- acl_supplement/data/Results/Text/LSTM/LSTM_cm_dogwhistle.png
- acl_supplement/data/Results/Text/LSTM/LSTM_datasize_results.npy
- acl_supplement/data/Results/Text/LSTM/LSTM_dogwhistle_predictions.csv
- acl_supplement/data/Results/Text/LSTM/LSTM_dogwhistle_test_results.npy
- acl_supplement/data/Results/Text/LSTM/LSTM_dogwhistle_total_training_results(1).npy
- acl_supplement/data/Results/Text/LSTM/LSTM_dogwhistle_total_training_results.npy
- acl_supplement/data/Results/Text/LSTM/LSTM_dogwhistle_train_results.npy
- acl_supplement/data/Results/Text/RoBERTa/
- acl_supplement/data/Results/Text/RoBERTa/config.json
- acl_supplement/data/Results/Text/RoBERTa/merges.txt
- acl_supplement/data/Results/Text/RoBERTa/RoBERTa_cm_dogwhistle.png
- acl_supplement/data/Results/Text/RoBERTa/RoBERTa_dogwhistle_predictions.csv
- acl_supplement/data/Results/Text/RoBERTa/RoBERTa_dogwhistle_test_results.npy
- acl_supplement/data/Results/Text/RoBERTa/RoBERTa_dogwhistle_train_results.npy
- acl_supplement/data/Results/Text/RoBERTa/special_tokens_map.json
- acl_supplement/data/Results/Text/RoBERTa/tokenizer_config.json
- acl_supplement/data/Results/Text/RoBERTa/vocab.json
- acl_supplement/software/
- acl_supplement/software/Image_Models_Keras.ipynb
- acl_supplement/software/LSTM.ipynb
- acl_supplement/software/MMBT.ipynb
- acl_supplement/software/OutputAnalysis.ipynb
- acl_supplement/software/requirements.txt
- acl_supplement/software/Transformer_Runner.ipynb
