# Supplementary material
Source: ML conference proceedings conference paper supplement (https://aclanthology.org/2021.findings-acl.166)
Supplement: OptionalSupplementaryMaterial [file 2021.findings-acl.166.OptionalSupplementaryMaterial.zip › acl_supplement/data/Dataset/content_warning.txt]

Content Warning:
Both the dataset and the annotation codebook contain hateful and pornographic content to which some viewers may be sensitive
