# Supplementary material
Source: ML conference proceedings conference paper supplement (https://aclanthology.org/2021.findings-acl.166)
Supplement: OptionalSupplementaryMaterial [file 2021.findings-acl.166.OptionalSupplementaryMaterial.zip › acl_supplement/data/Dataset/DataSplits.csv]

	Train IDs	Dev IDs	Test IDs
0	1061622575963521024	1045664997588766720	1108892807018758144
1	1054533554032435200	1107648231784144896	1115276435432853504
2	1042823431039922176	1114193623199956992	1054560047202742272
3	1105367944245248000	1107023453515862016	1024252637045239808
4	1109966259104419842	1050841837483819009	1053894921961304064
5	1107885587384590337	1116925911402778625	1114271764404756480
6	1045082475460988928	1105078427881738240	1059530820606742528
7	1114303531576635395	1044570092762267649	1116042450991075328
8	1116682698028933122	1115429257990115328	1109244411924434944
9	1105877464860053505	1050692413109489665	1051486821685882885
10	1109628166774099969	1105313181981986817	1106546229524213767
11	1042027930958692352	1053548765527842816	1047176060092211200
12	1113477245463670785	1107065780565393408	1106524592447856641
13	1108128857859739648	1113640165870727169	1043413806041456640
14	1049918567452426240	1114207570565136384	1109999380654948353
15	1113933224475090945	1056028352723730433	1108764484716429312
16	1109206188028280834	1106692617746726917	1107733549766098946
17	1106510871533154304	1052595597906247680	1062450549055021056
18	1048566460241600513	1115367644129927168	1050995405159165952
19	1106791102114381824	1061050939023507456	1058874123617677312
20	1107037602455187457	1105739156322508800	1108182159922266112
21	1051928642052390915	1113436208170975234	1042352771167477765
22	1114331368450715648	1042824626034941957	1051527702753230848
23	1107248852006924289	1109677307558588424	1108931029769682949
24	1114661417775505412	1052197508850610176	1058464913495150595
25	1108867787127029760	1050123558742048781	1107282344203952128
26	1110403344600752128	1034940055499010048	1054605519837523969
27	1114640951664893952	1106588627524423681	1042860455088156672
28	1107033426282967040	1108796744806981632	1056686524006305793
29	1056368741007745024	1050140893737562113	1057034881916641280
30	1115455977765998593	1106621801348689925	1108701637957300224
31	1034836652605300736	1114057233715748864	1107016011079974913
32	1059001188257955840	1115462752753971200	1107502771400372224
33	1108302796057690113	1037301409861922818	1057430860838760448
34	1105304262215720961	1109300010578046977	1115425010900848645
35	1110280883053821952	1108875814664314880	1042440758220005376
36	1114553596249616387	1109125875260448769	1061910083515248641
37	1109950838288629760	1042953354886955008	1105580369020112896
38	1109152558017400833	1108945779035521026	1115769250197565440
39	1116700897399037952	1055948419867574273	1058538218730258438
40	1108166291381202944	1050905926503256064	1051275520699244545
41	1108407068720066561	1106903273578160128	1113900292247044096
42	1107519161641717760	1057117508753350657	1055273737132654598
43	1035304593830408193	1060873327819014144	1116066732903419905
44	1056655083465715712	1116335552779968513	1064189790021668872
45	1042374143004565506	1109437923345223681	1114041243615604736
46	1116403096551337986	1115869100566249475	1056441383534379009
47	1063920237773537281	1108620929620471808	1061076346565287936
48	1110440770681470976	1109339979811979264	1059508332560613378
49	1050148652042342402	1037309511789436936	1114365706026536961
50	1107784370356662274	1105607162309406721	1064325232557768704
51	1114651913738387457	1114490031132094465	1035262675993935872
52	1109869622751363072	1058454046628044800	1062734507080667136
53	1115694053662822400	1108903712125259778	1105870932051152897
54	1116521248174039043	1024459898682191872	1023952990984654853
55	1113370460060827648	1052606055170039808	1050545519964119041
56	1105795525226446853	1107736952160153600	1109842098990313474
57	1115730884341243905	1054172603852693504	1034877538408062976
58	1116376916347498498	1117395369435041792	1054485828951404544
59	1054132813086236672	1059560463174983680	1105115461627404289
60	1035608973326643201	1115787213231480832	1106593104684027907
61	1109285113395847168	1113887328928505863	1107882212605784064
62	1114946223151243264	1115468531028627457	1050853581883154434
63	1115852441080217603	1110171625155108864	1035508530860548096
64	1057633442098221056	1107301983852081153	1105269450859786241
65	1062589642569072640	1116670595490557952	1109720334511558656
66	1057449614134165504	1109915975749652482	1107968886081634305
67	1107439112917790721	1115673345712906240	1050391873330786304
68	1115070093036273665	1108869681803390977	1056358330250215425
69	1114253746115153922	1115203216612954113	1061527969653501953
70	1050700644624027648	1050352150608576513	1052559416569020416
71	1115389748934266882	1108265981674029058	1107508416698896385
72	1113074513577734144	1114605277976903680	1057098802287521792
73	1117515536164900865	1108025558049476608	1051332251106066433
74	1114287984210214913	1043642474265227265	1035866576061382656
75	1062092272551059456	1109540912118579200	1061883468240560128
76	1049108959649513472	1046033504579014656	1115322519169507329
77	1109383190073036801	1058785430106136576	1113407989824786433
78	1063618959113510912	1062653723535663105	1109631046302072834
79	1044037118144598017	1057453549624406016	1062316236694908928
80	1109712760051396608	1105682451211284480	1108818558249824256
81	1107411796682371072	1051618494788317196	1113656019412901888
82	1110444146232303617	1116639534077190144	1113875060354367489
83	1050493240598773761	1106572604826157056	1109671346269753345
84	1041710893451501568	1107981975829135360	1058994219170312192
85	1045723189035307008	1053751223558389760	1061388778743496705
86	1056901526105534464	1113164605092769798	1117517583681507328
87	1051587487611670528	1058870654957690882	1042085189759975424
88	1113601813213847552	1035630630724411392	1106660984683405318
89	1024976803885137921	1063665806016270336	1059477211332235264
90	1107689945693597696	1114221113037299712	1054051986234953728
91	1114695040335523845	1054069282714386433	1110029894107332608
92	1057419953383583745	1054407378370613249	1035244105041891328
93	1034939525187948545	1115224597962448896	1105244284624822272
94	1034939108697751553	1063638632169385985	1105261766144114688
95	1113852884658081792	1024505349271891969	1110311771108184064
96	1061549874498453505	1107129436447690754	1034977939497144321
97	1056991756150026243	1109427471718342656	1061653033396985856
98	1055884642606350338	1115291191904493568	1106825962514247680
99	1109486634263896064	1109190152306544640	1117309132678287361
100	1107631444216762368	1115883865934114817	1108023859373113344
101	1049758335824584705	1061789996825395200	1114290912023257089
102	1053364294853844993	1115812783294230529	1116351583154049027
103	1058359655196491776	1035254005335814144	1064265701937041409
104	1108491748689539072	1046778264797290497	1049519770935148544
105	1108308896505044992	1107825752492462081	1061334295736995840
106	1107120311265189889	1041814400116568064	1108038886046007297
107	1053449040174690305	1115784784649883653	1060923251612966912
108	1114672115494604800	1110372503929741312	1107801961015975936
109	1044854226424418306	1113620188300283904	1047257632556417025
110	1114590708969746433	1062745676625403906	1106860073962426368
111	1062441292154724352	1042081748463640576	1053702508957388800
112	1050139473873387522	1108474969057619969	1114451353382690817
113	1115126563668885504	1037168686740586496	1106580970629681152
114	1109825886302453762	1109167381182443520	1056800782941671424
115	1105326574159589376	1056496046229065728	1058606958696108038
116	1060938072001560576	1115450374272487426	1044695563437068288
117	1057226288644132864	1108437045624692738	1113147404642082817
118	1035248494494330885	1114558139851005955	1034967888476524544
119	1062916731163729920	1109990461719105536	1110023763150532608
120	1107796651610128384	1114341541781364737	1041860965548130304
121	1056183855965786112	1114888347640651778	1109208203928240134
122	1062746446280249345	1115062937327161344	1115155116498149376
123	1064415064722042880	1115612484730122240	1057986269542780928
124	1115474998121193472	1043633348726476800	1051752728907661312
125	1107326212639260674	1059442584051888130	1114218538485469184
126	1053365967248605184	1114080107029725184	1052580299916230656
127	1107496281356886016	1043955285281230848	1049868627321729025
128	1114275995027148801	1056650353339330560	1062801072404672512
129	1059477306794786819	1108535199699218436	1055289967184920576
130	1054171381859004419	1057665449838739456	1061356918080454656
131	1054079762463973377	1061728766265880581	1109890120516284417
132	1108072629842391041	1106785644838182912	1113575940729085953
133	1058890601201127424	1046810169072668673	1109602117537464321
134	1045724963326611456	1113072243704201216	1037037227258200064
135	1055912818971734016	1045848403442163712	1062470093718937600
136	1116500593110147076	1106756897967878145	1061491259980693504
137	1034917161716920321	1110242773720915969	1108546561930219520
138	1114636101485047808	1053389906746191873	1058511486966874112
139	1057754597761183744	1105616669433581569	1115270425309777920
140	1114332121143762944	1117127063180197889	1110445370796965889
141	1109884093964021760	1056705767896768512	1107628318151581699
142	1115628440538046465	1054066820402024448	1114244802789273600
143	1105417426517348352	1115053108827230208	1115651523793518598
144	1050803241624236032	1107717449154260993	1109881221436198912
145	1116936777506312192	1044775151500480513	1113517914672566272
146	1109202047658790915	1107373783227207680	1115899208819777537
147	1105206747164262408	1106573332151967744	1116399997371781122
148	1055980378912186368	1035130399167598592	1034867790782423040
149	1058986865066274816	1110319844132446208	1045085286756208640
150	1108564002249031686	1063584019894476800	1108434445340758016
151	1058182825621381120	1058745794860367873	1047185468373135360
152	1113054483553103873	1117314975783997440	1113142093533380611
153	1052604768395423746	1107101902360268801	1114610686422863879
154	1114251901032443904	1107493527141969920	1116035614401601536
155	1049913185409601538	1037317632565960704	1105649960232591360
156	1059498592707141632	1114266010461310976	1044314075285639169
157	1110128190641467392	1108419364481568768	1058592078425276416
158	1113113339637456897	1058538965383438336	1113661078926495744
159	1105142455173828609	1057468133995352064	1050710621283643392
160	1052554196778545152	1042479877453164545	1057431128188039170
161	1035885160980533249	1114743207722721280	1050532510474625024
162	1116453986448617473	1057281802199621633	1106707571493220352
163	1114247191634137088	1110249210056716289	1042217078663593984
164	1054359885935267845	1108549142501117952	1044177880526270465
165	1110015505094438918	1045933420637872129	1063602331680301057
166	1056550980526002176	1045757691732414464	1044036911696957440
167	1106998615686426625	1044582561194827776	1113117629328261120
168	1034928825707188229	1057465963703123969	1108865016059576320
169	1107330354698956800	1043209159473283080	1106805736175292416
170	1056755742336786432	1048707472658026496	1105700744030760960
171	1109206768687763458	1053407213107269632	1062879659896041472
172	1108597479048544256	1114463505044865024	1115049297727213568
173	1035546994515824640	1036325834125135872	1105124051616448514
174	1116453402001715224	1057412287114420224	1053349233988911104
175	1055212593852375041	1109298368373616640	1057090641761574912
176	1058733313756725250	1061410118552694784	1108907836942225408
177	1034855829059584000	1062721961502171137	1024805262895579136
178	1114042297551851520	1105298222258507781	1057003409461649408
179	1105143999000731648	1063503907324862464	1061828676705230848
180	1107093770896470016	1035128792455565312	1106768577825304576
181	1108911538386231297	1114681621381251072	1051291155613110272
182	1049794020946452481	1057437947861975040	1051130538935939072
183	1057017858377474048	1108025057467658241	1058517586495893504
184	1105337283664904192	1057388615599296512	1114333375823740928
185	1056278931622555648	1041653217984163841	1058130377443893248
186	1035992340672872448	1106765151087280128	1106828274733334528
187	1116408201107378176	1057642874244907010	1035324085398593537
188	1106568173246185472	1107722857931591680	1062808340894490624
189	1115656225645981696	1061235017190379521	1058123956589346818
190	1114721696764891137	1115034619567464450	1114248320539435008
191	1051930197916758020	1107176107034451969	1109867150833934336
192	1050929020177698816	1107505694352134145	1057798042408095744
193	1107977994000363520	1055909474446254080	1110370376759103489
194	1049298429355155456	1049890518442934272	1115412072060342279
195	1044066322412376066	1049856767616868352	1106657103173902337
196	1115018885915336704	1043209544577347584	1116898106317201408
197	1115279594708459524	1108939086230773760	1108081927716827136
198	1062318676639080448	1107089132877242370	1061400938362101762
199	1062462191851528192	1108971937911312384	1034939924322115584
200	1053668594754772992	1107971365414543360	1042151256599482368
201	1056546274936274944	1108750238632816645	1057577929721462785
202	1051385843896737793	1108851111417516036	1115384511796264960
203	1114166254800121858	1054144471317639168	1062494928327073792
204	1107364030883266561	1105519894815277057	1105875349399834624
205	1106653583221624832	1034826995878653953	1057842053273567232
206	1057731867875704833	1106715130186719232	1063897500296364037
207	1046914370729578497	1056213445648048128	1035914114634272768
208	1043543628617015296	1109778916078768134	1108804729604313088
209	1107760134607044608	1107797151172710400	1113687267749564421
210	1106702984375726080	1107001437349990407	1050825970066890752
211	1063899953565700097	1061014982245208065	1110368097645547520
212	1113753423109705728	1106571484833738752	1110531659965833216
213	1062778888093384704	1044010021191704576	1050412750608842752
214	1055029842696056832	1035655594680639488	1053964819835961344
215	1110415828896399360	1114841461131026432	1106619475535777792
216	1115766981578383361	1106607394371657728	1114784150655909888
217	1113490446167224320	1107401117493809152	1044321688215859200
218	1113918724510117888	1107356216659980288	1042266507345096705
219	1114177145063051264	1117504341575917568	1114645537146449921
220	1108914662786154497	1054184163488788480	1042072743133544448
221	1116743040356487169	1113350567110246401	1046950502402002949
222	1058185544935436288	1114808799678935041	1057987103173365765
223	1105558988198957056	1057471626965598208	1063902244712656897
224	1053834801709547520	1058532973333614594	1114976253516423168
225	1037188893613936640	1108836873827504129	1108564076571975681
226	1037423575479799808	1051150640011972608	1057088252216311808
227	1113138731358203905	1036272439729242112	1053841368441737216
228	1035963059947352064	1114970981687287809	1109983270022844417
229	1115195658351280128	1117241842477748230	1046275065476775936
230	1109685235908857857	1042727677982138370	1106835705198710784
231	1113351918972100608	1107456933106278400	1108543156658864128
232	1114999856668581889	1113096171554291714	1113596794565464064
233	1044731620698333184	1062087010842750980	1113188612454137858
234	1044477676684279808	1107134427241439232	1063991714178846720
235	1109351648759967750	1058148528244056064	1113916195210764288
236	1113216560166895616	1116358176608280576	1110441914665320449
237	1116697118956146689	1046973939271049217	1047023825454600192
238	1114988098566287360	1107804653083942912	1108097788909375490
239	1046456309120462848	1114969890648199168	1062437884802809856
240	1057481744121774080	1063379449629081600	1105194904597209088
241	1049746318841786369	1057692457335369728	1105600891363737603
242	1049454507858382848	1063439199787864064	1053866832556425216
243	1061818937657049089	1105617375783673856	1107795780826480641
244	1113162794340319233	1115419602585051136	1107387893541232642
245	1052578433635676160	1044725096588472321	1114373415685840896
246	1056512736585310208	1044153695439638528	1113840493077630976
247	1116704372866592768	1058972964723548160	1061662530463064071
248	1108813728760254464	1116684169671847939	1050152470574456832
249	1044838759605444608	1055260190025539584	1106960080694583296
250	1115359665842475009	1060993259097522176	1109446237852450816
251	1105832908105961477	1049968510296821760	1057748846179241984
252	1115162844629172224	1109500253294809090	1116308727882223616
253	1115423998073081857	1042554391365083136	1109102107548893184
254	1058913922714079233	1108294721288339456	1106865399688118272
255	1058048843839729664	1116434047880892416	1109416005762056192
256	1114645912662499328	1062411558767202305	1063599198984130560
257	1107284944441802758	1054233477426626560	1113439959371911168
258	1113540564090335234	1115977243271081986	1116375065489231872
259	1107439635830067201	1061192430794498048	1105497451115544578
260	1064300194177720320	1043524088856174592	1109903594986319872
261	1113462331403579393	1114741421897080832	1115796184659103745
262	1105206261547556864	1113984044159590400	1036281738090041344
263	1114644621223710720	1107982205840551937	1109806440724774912
264	1107100475478941696	1113584696028553217	1064239544000831490
265	1058269063133052928	1115675768955207680	1115746244033503233
266	1109638580584873984	1054199415039291392	1058103018330165248
267	1114757179628826624	1114317059670700032	1058202133474902017
268	1113543849715093504	1043102290549399552	1108301258497187846
269	1053910778800148481	1109291310819606528	1116380692064210945
270	1116693463607603200	1117105498749325312	1034928116257382401
271	1105217410242695169	1109044961343926272	1036246511686963200
272	1105530793110192128	1046838830228287488	1115660329386676227
273	1058161925069197312	1057379521631006721	1054508250912108544
274	1113869803624726529	1058291918281465858	1109903055204638721
275	1059526892905213952	1037189443390717952	1114758165382307841
276	1053368550851821569	1106674005455634434	1053788544009945089
277	1114949223701725184	1108910132946178048	1024077365373227008
278	1061853138045599744	1061265773845471233	1064367919084097536
279	1105557823797248001	1114959581371748352	1024604529134907393
280	1114980555731369989	1113989854604427265	1108400026328489987
281	1051318543600443392	1109946804257411072	1109195496541900801
282	1061473355084251136	1051510609689399296	1047135867960143875
283	1061033857770815488	1056294390547787777	1114218815494086662
284	1063992371950571520	1113832573870804992	1116281663921762304
285	1063887733683310593	1042594867191472139	1109963122821992450
286	1045710810528415744	1036333782238937088	1109859110261018625
287	1109627496914247681	1115399323951534080	1114248174414323719
288	1105608010234241026	1116660619976032260	1106957685898051584
289	1062948305557221376	1114184882907799552	1034877991459979266
290	1105199863455727619	1114839074504884224	1113222329214095360
291	1055310435824664576	1053880601533710336	1064253056676696064
292	1107960955906985986	1107535921954447360	1107364431498043392
293	1062895521126379520	1051253154585694209	1056736675550892032
294	1062853491805294593	1051594253967736833	1108081074847051776
295	1050635792790347776	1110186219563032578	1054119704304992256
296	1116808470630752256	1108567834383261696	1113738500694859777
297	1042673189132926978	1106672793612099585	1108326487474745344
298	1063890976337522688	1056153714526892032	1107894624666845184
299	1108219800894038016	1114900778714587137	1113898361650909185
300	1057877958667337728	1057224879257407488	1114484230065664001
301	1105376264590749701	1113125851648843776	1109688447936143361
302	1055970669685428224	1106503148728922112	1107679154743451651
303	1114336719313223681	1108223792004952064	1053708870600810497
304	1063665381938589696	1054614562949935105	1034736819789750272
305	1106728374087618560	1110383373694853121	1063787173458137090
306	1117282811248095233	1109148228899893248	1035149310038618112
307	1057769798166372352	1053359284166156288	1116483741952741379
308	1113066037757411331	1037001038937686016	1114179521177985024
309	1045907893969702912	1061848200191954944	1117147560827871234
310	1052559249149026304	1046181127248130049	1056767565723246592
311	1051653687175729152	1109978744628764672	1043504077857071104
312	1117555314470150145	1110019487401570304	1057057735756390400
313	1035014874496163841	1056201328081465344	1110282906272976898
314	1049993719372570624	1055295289437896704	1061742210956357632
315	1108507230133989379	1105123798888648704	1062266554493136896
316	1113590292320595974	1058173950587531264	1064007494547042305
317	1043159325173313536	1058602850886934528	1047233479514017793
318	1062874655034351618	1057427339749974016	1061251397411315712
319	1052638759441842176	1053321772274200576	1056699375471210496
320	1108024146644992002	1113517234289139712	1054174769514512384
321	1035122012988104705	1046557521824149504	1109673276270411776
322	1108253395595464710	1061788070125752320	1050792216673886208
323	1109150903943266304	1052551068285059072	1107761337671643136
324	1115987211151978496	1105750260033437696	1113888659818917888
325	1114468663778775041	1036018484608565248	1050194923415396353
326	1110385755921305601	1105656545105334273	1114975202579030016
327	1108439485501444096	1057690003403366401	1116044056352702466
328	1114098947428057088	1113848825930813442	1057757913467535360
329	1114957160331526149	1047290667414802432	1061520989224239109
330	1116387755511173120	1107753194673836032	1051581391895433219
331	1047524191036166144	1114890019540557824	1109150901724504064
332	1117187460520448000	1113844986447945728	1056225446130532352
333	1058103031894429696	1105571603054841858	1114581548936892416
334	1050040248279986176	1044213631578263552	1035003596050452486
335	1105325112675495936	1115072559865827329	1063440109985517568
336	1053492898891739136	1044242171547705345	1114589089020301312
337	1105643293029949440	1041631983946784769	1057001469084426245
338	1058030998854594560	1105549570631782400	1108386064077651969
339	1115660802206392320	1113896143249969153	1042067385643958273
340	1107862057058099200	1063712503908261888	1042153762201071616
341	1050862517730328581	1046862154262093825	1037037807238184960
342	1116935424864342016	1036032753307983872	1116648332066213894
343	1115432104119029760	1060887349515747328	1034860877814673408
344	1035498132921049088	1107703313863081984	1107796689920946177
345	1114958282916020230	1023976217232506880	1056701407007592448
346	1053303166979125249	1041772232836505600	1042755940863418368
347	1113514908291870721	1053697890818785280	1113017568766373888
348	1063424816856862720	1037091050307891200	1061161453904834560
349	1041880071621857282	1034827616757395456	1106675169718951938
350	1047250966490148864	1109111607404175362	1110364292841439233
351	1055255218009595904	1062071717521170432	1113423770390343681
352	1037467854239481856	1063873001609924614	1063853291552063488
353	1115874720828862468	1114817646913048576	1105609159872077824
354	1057608076235141120	1046957513277693952	1061220807525961728
355	1059051516085047296	1107035398759477255	1054149802731155456
356	1105576293524037635	1115285298563375105	1114205083850477574
357	1110174450069241857	1117258751831105536	1116002172582420483
358	1110384504575799296	1107025957645418497	1063451859053174784
359	1109080594829508615	1109808982275883008	1062819221007032320
360	1037290617141776389	1051306788203556864	1041824536319090688
361	1037093047664893957	1035357589440225280	1061805835926429696
362	1105656855135748097	1062501198907944960	1062913521078419456
363	1043662699048112128	1046289753874845696	1108547857785806848
364	1061859820439986176	1108223917167124480	1107753891452645377
365	1115804657572560896	1057191067508867072	1110257688469032963
366	1115819814604251136	1044260610161221632	1114484452292538368
367	1044662517241384960	1113620022922969088	1042675227367333888
368	1053973547704573954	1115468692068941825	1105574730923429888
369	1035339506780708865	1108452656815706112	1105659766456487936
370	1037469340835012608	1108525668885770240	1109870593707515911
371	1053635490073722880	1109962745233981441	1063451208071999494
372	1054690523137617920	1107378854123974657	1061654643028226050
373	1058565520499195905	1115411938849239045	1109746347979108353
374	1109590545750462464	1107497349872603137	1109182977207087108
375	1056602198027763712	1109188108740894721	1113043187361374208
376	1051490700531916800	1054566998888202240	1114750222721323008
377	1024290247822192640	1053783002914926593	1107369806548922368
378	1114625496468328449	1053431443102195713	1115162314976649216
379	1106622103300857856	1056398659246530560	1057713424770183168
380	1116359719441051649	1113492628815978497	1044710394596675584
381	1107730123720216577	1107516129927258112	1105564380073287680
382	1108899430428753926	1062443212436987904	1061008117465530370
383	1107321067499147265	1046121216224972801	1109124614331027457
384	1062234052135071746	1114711485559627776	1107749196659130369
385	1044328191186403335	1035480844616519680	1107819018835103745
386	1114014351118172160	1106523769143607299	1105098234182029315
387	1108545567569989632	1044434900684689409	1061808305574764545
388	1050035984186974208	1113432131097722880	1109294906084937728
389	1051473851169660928	1115611901902241792	1044626313494110208
390	1064379811861315589	1050983232932593664	1054366937113743360
391	1107829276068339712	1057389336335917056	1107354238584274944
392	1054553966628012032	1024298461737431040	1062350493135982592
393	1113468671890984960	1058760148691361792	1057075711708725253
394	1108353683509706752	1113127368581758976	1045937256425553921
395	1043501570489573376	1115671751260872706	1107347655347314688
396	1105730340809830400	1105176928200376321	1106602466341195776
397	1115149887543349248	1110287361626247168	1105218375435862023
398	1115107741104840705	1035186301170012161	1110516280673660928
399	1024023527228432386	1047056014300893188	1042240922895953920
400	1057650763822981120	1056359048117837825	1036211780253569024
401	1114945293315973122	1108781250381266945	1042283831284379649
402	1114605662103846915	1114728334917865472	1115797154784776193
403	1035928862805450756	1023954804798717952	1053993860123242498
404	1025113422172573696	1106571491016089601	1113612772724682753
405	1042018092698746882	1059469120360640512	1110377938493599747
406	1055984240079392768	1052616853095415809	1056975193715826688
407	1107719907288977408	1114806815773138944	1106692998312665091
408	1116858592894902273	1049770703438995456	1113619729627979776
409	1115902877371908096	1044572332260569088	1110342878327439365
410	1044693668400164868	1105231952536317952	1054145779172954112
411	1107885553515724800	1114725981418344448	1055899608000446465
412	1110230973197758464	1116523388724482048	1056899209541038080
413	1105817124243734529	1108236928351195136	1114280112894169093
414	1117056774853603328	1107444102315081728	1115902657229619202
415	1108265767013937152	1046224483495739392	1049935344538460160
416	1063957402930872320	1110016021375713282	1110349746495983623
417	1108137329678565376	1058042397484036096	1109957939715018757
418	1105744137419149312	1054544080510898176	1046268564863238144
419	1056280593649033216	1107722303972925440	1114769006882361344
420	1042055334163111937	1114897952768712709	1105293057866506240
421	1035529292409712641	1114219186094579712	1114074102875213824
422	1051314771398717441	1114309252158500865	1113225736331067399
423	1107902015638663168	1053851672680771584	1110221273416646658
424	1061711678302240769	1105145552080121858	1058113465754247168
425	1107078103778689024	1050354924884844545	1116865207761022977
426	1116763430462029824	1042928545000054784	1056247093340196866
427	1046515083239555075	1061272380247625730	1115437072679153667
428	1059532821994397697	1110501554635894785	1046904447098544128
429	1107700843439185921	1056944317758103552	1024257705244946433
430	1024056839489576961	1058685630958301185	1105620416469585920
431	1037396055204265984	1114421280348839936	1063901397085839360
432	1058539581090529280	1105664086996471808	1113131674722807808
433	1034759440686346240	1060860961811259392	1057338230230671367
434	1035338285932077056	1113131887776747521	1058091473944625152
435	1113853146751750146	1114690566833360896	1107677359652642816
436	1105367103908048896	1049867430208655360	1115521882651004928
437	1110378111772745729	1106580780308983810	1114714897319960576
438	1058861568136495106	1113670474670669825	1054707009780625408
439	1050110197656641537	1114004813560406016	1106742580568621057
440	1064166398543441920	1106991937414823936	1115142495292334080
441	1107753827611131905	1108564395011915777	1056522297559998465
442	1036053609669177346	1041694184707567617	1064171396597784581
443	1062434343765925889	1114649731295215618	1050396636936118272
444	1113512893394378752	1050373090256056320	1106748819683848192
445	1105838756811165699	1109617388310290433	1106995269093285888
446	1105357613661736961	1107018662588882945	1115308624467955719
447	1114256524954804226	1116314459881005056	1115640415204593669
448	1113358422274125824	1108005257160916995	1116052760569548802
449	1107338481376870400	1035326559350087680	1105476517482688514
450	1107779407186407424	1109701676888440832	1108783548155219969
451	1109933320945762304	1036102447561887745	1050128502840651776
452	1109260068309078016	1044718556200480769	1108075827252600832
453	1116362802615033856	1056561561102376961	1113699622344482816
454	1108627875853414400	1115017441946603520	1046414021891706882
455	1055318845655724032	1105564764145627136	1044571737512390656
456	1050585149539307520	1115806079219314688	1105285356566519808
457	1043373366206517249	1107519771497517057	1044325195232595969
458	1047193094150610946	1106929066236657664	1050852403044605954
459	1108718848738553856	1054095436024307712	1055244911828713473
460	1024054557989654534	1108729996485500938	1105404678303608832
461	1107297844678086657	1044633589244059648	1058318853816664069
462	1052597637180993536	1056228387771969536	1115265995759923201
463	1115706545205964800	1106696436266217473	1113426589839241216
464	1110077688788733952	1062154238678065152	1024707445644570624
465	1114685922711429120	1037110754716143616	1105200347943981056
466	1057767335677886464	1053878913418461189	1045142651274752002
467	1105299379081170945	1109095000275599360	1044605884297437185
468	1113653492923674626	1055178626528768000	1058004651168149504
469	1057615971710451712	1047308696257269760	1110448774030204928
470	1037045514431279105	1050812762530689025	1108785071115460610
471	1105138133090238466	1114912991248388096	1109342411073994752
472	1107771995029229569	1052399551271841792	1115100350329917440
473	1043606900246491137	1109417880364437507	1056706402163572738
474	1051667555104911360	1105275194783002624	1105404680128118784
475	1113540283319246848	1050404733771485187	1057730888711241736
476	1114289499973005313	1115638107204771840	1057742077012905986
477	1056933528858963969	1113541334063824896	1113420387923255296
478	1115699913231355904	1114894198019428354	1051730252232318976
479	1035675518383861760	1114646008569446400	1053293279096139776
480	1114941784210042881	1106988371832913922	1108946044421705729
481	1053416064455970816	1061651512445743105	1114880304651673600
482	1114577543850545152	1114659147587497987	1024495306094854146
483	1115069188064722946	1043724009207201792	1061357037001543682
484	1052592729815900165	1115394341290176512	1107213413468565504
485	1113664722853871616	1037216299200507905	1063577167018156032
486	1109512999268687872	1044381035700531200	1056592261474082817
487	1050289102946529280	1043830485569458181	1116513011932512258
488	1041802184151719937	1109563705442729985	1043040487966474240
489	1057422185663348736	1114142242506145792	1108000770320850944
490	1044420078752518146	1109532009091747840	1024780876486455296
491	1045181442861477888	1116385923913195520	1054138944386990081
492	1042967287139954689	1062035635173756928	1044448193453412353
493	1115482819466354688	1117508321542574081	1117096158797676546
494	1105883091111956480	1037197077779042304	1114492136324341760
495	1105204590033530880	1113440957368635392	1037392512737001473
496	1063513953152761856	1114358926319935488	1057159059873378304
497	1113853411374448640	1046501830405107713	1053703953605525506
498	1053495671263768576	1061682217733242880	1053452042826670080
499	1115417681837084672	1051624108553883650	1115305784521392128
500	1107030991741337601		1108398078468517890
501	1043579897644548097		1058837374489292800
502	1115037425666019328
503	1042681361973358592
504	1114216074554347529
505	1105469408179380224
506	1115136998958870529
507	1063748973306028033
508	1116398931175456771
509	1043687110090416128
510	1107766944365715458
511	1108101058365145088
512	1116880468841050113
513	1058151882663911426
514	1107322442652008448
515	1107963228586500097
516	1058711358307553281
517	1054119490483408896
518	1035713247033348096
519	1058782152727252992
520	1109827431215611905
521	1117050237229596673
522	1113202633173499908
523	1117179865298554880
524	1106855229465731072
525	1057972152312496128
526	1105213237782552576
527	1042299045040087040
528	1056697968286425088
529	1035609444938276865
530	1107771743580667904
531	1063780466745065472
532	1108128380921303040
533	1045950985330290690
534	1107961451946209281
535	1024321326486499329
536	1050797374379941888
537	1114757260234952704
538	1115399051619573760
539	1062852220927008773
540	1034984657648070657
541	1114945212256800773
542	1115222182580359168
543	1110363910962663424
544	1043526440271208448
545	1059461500539207680
546	1061025840736145409
547	1053959331329310720
548	1116683270798958592
549	1062557802911027201
550	1108720529589051392
551	1114427719511490560
552	1109178724937719808
553	1047077090707853312
554	1117341477292662784
555	1053763763793547267
556	1113499046474342400
557	1042798312720662529
558	1042473611397869568
559	1108265985235144704
560	1062824606069940224
561	1106791315696771073
562	1114184359387570176
563	1107269682711678978
564	1110307706123046912
565	1058478068140896256
566	1110209972267335680
567	1116503223970476034
568	1050865972314161152
569	1115994828905570306
570	1117081409393291265
571	1113886629184376841
572	1115368316334272512
573	1046132885642780672
574	1108801435498676224
575	1034977343767363584
576	1057458295240384513
577	1110021018557415430
578	1110009322627612672
579	1110305417983348739
580	1108087464814669830
581	1053922974217179136
582	1061530153526980608
583	1041830394558115841
584	1115686568289886220
585	1054684139323117568
586	1114245800874455041
587	1057995967973203969
588	1035697533748686848
589	1117595324317614080
590	1024363951289716738
591	1058510713092759552
592	1056559416487612417
593	1115295232038506496
594	1114944229992816640
595	1107558317713285121
596	1057148009950130176
597	1108140333358030851
598	1057495828229693445
599	1113664101035794432
600	1042313249193111552
601	1061267240572608514
602	1035034019912720387
603	1058032438662688768
604	1061446129559134208
605	1048261598069108738
606	1052597550983733248
607	1109764360283537408
608	1055122719136714757
609	1109990125730037760
610	1105680961042374656
611	1113826766341033984
612	1044648712234913792
613	1049792613585494016
614	1062448157500555264
615	1035187396520882177
616	1113530134970155008
617	1114947720400310272
618	1063810275483230208
619	1058540898336686080
620	1115063638769971200
621	1115100377135718400
622	1061068224840810502
623	1114311995350642688
624	1062722896949374979
625	1057107246042267649
626	1057712194299654144
627	1025317639378403328
628	1107754245279883264
629	1107527424693145605
630	1035522047684878338
631	1108858855067275264
632	1056908595739144192
633	1109533324136062976
634	1056317019656765440
635	1061395592826494979
636	1108721557315170305
637	1108723942951399424
638	1056486463020380162
639	1055939531852136448
640	1114181942499520513
641	1057425410638667778
642	1058798744102207488
643	1042453836055633920
644	1115651370865111040
645	1062658740099330048
646	1117228218153623552
647	1109808136540618752
648	1107227298602852352
649	1057392848381861888
650	1042913055653416960
651	1058507424171053057
652	1035248457907351552
653	1105136342516801536
654	1053779064144715776
655	1043576249220837377
656	1116361022342926348
657	1113919374807711744
658	1116499607733833729
659	1115798241533157376
660	1055119703688077313
661	1115662768638656513
662	1024700630076665856
663	1047066318787289090
664	1108203458568560640
665	1107385928060993536
666	1035781763065241601
667	1114263159265583104
668	1105801427711078400
669	1061327712915202051
670	1050513102616309760
671	1114931060150874118
672	1116699300854104069
673	1035173655179874305
674	1106668716933238784
675	1107129584175079424
676	1050782479399968770
677	1055944678812667904
678	1037285008405417984
679	1044445792876941312
680	1114701637556293634
681	1105637249348259846
682	1105518811879522304
683	1034944602418102273
684	1056242630923829249
685	1051515932194103297
686	1107776302826905606
687	1115348705882800130
688	1114709716528189441
689	1109449486579961858
690	1108069271853326337
691	1056208426555006976
692	1058280252210741248
693	1113132270846607362
694	1043223305170419713
695	1114310852293697536
696	1114809435522781186
697	1116679391868870656
698	1062446607571042304
699	1035323204481380352
700	1115348431650709504
701	1113582804909080578
702	1054105722949173250
703	1057153877944918017
704	1117166129946845184
705	1107057878559543296
706	1057337919126585349
707	1024275355794911233
708	1108889191998517248
709	1042415943756873728
710	1117470741799276545
711	1114672445787492352
712	1107819456758194181
713	1109137913558765570
714	1114109979462647809
715	1046186972027531264
716	1044601957355261952
717	1116417783615692800
718	1064271433600286720
719	1061160558412660737
720	1050105509586628608
721	1107499865011937280
722	1108382286163202050
723	1108078361748873217
724	1109038890281848832
725	1110290406074433537
726	1061875015589789696
727	1057697613833740290
728	1046978446042308609
729	1056221501010178049
730	1055285332680339457
731	1061835483792072704
732	1051527675246866437
733	1113488375510708225
734	1055248307621126145
735	1035323274551545857
736	1054354743483686912
737	1045005911893454855
738	1116474414655262727
739	1110449951434334208
740	1107272107367546880
741	1105832127629873153
742	1116392685311549447
743	1053412144283291649
744	1105227600845139968
745	1110067648484696069
746	1114441278689693701
747	1057648194685992960
748	1064220543518457856
749	1054472044681838592
750	1116528579578343425
751	1062513312464822272
752	1108764380135608320
753	1115263348248076288
754	1113488777958363137
755	1106608360240177154
756	1106596938676199424
757	1035396470688473088
758	1110370425391992832
759	1116354915423653888
760	1061292033246224386
761	1106644666168963072
762	1109442295336599552
763	1062853223432839169
764	1061523150335369217
765	1057761802401001472
766	1105708874080751617
767	1107115524402700289
768	1062737887291092992
769	1105531941259014145
770	1042692648413405185
771	1115772835652415488
772	1113219039747133440
773	1059545520446693376
774	1109978182415872000
775	1062749914504011777
776	1109244133640753157
777	1035575515241885696
778	1106940886536146945
779	1105483295465254913
780	1024643404293136384
781	1108151255581503488
782	1114287035215491072
783	1116389526178549760
784	1054244095735029760
785	1061398358047293440
786	1047139807481221120
787	1057821270144823296
788	1064201465877585921
789	1113097148026028038
790	1042312831352229888
791	1042230896294875136
792	1106582475994730496
793	1055040264883093504
794	1108839321417715714
795	1050972468737794049
796	1052624102723346433
797	1107702634109157377
798	1108806887326302208
799	1114286595350228992
800	1051525174204469248
801	1055762100067450881
802	1056560288504274944
803	1106604786751860736
804	1109845371046543361
805	1116479027802443777
806	1114918822417436673
807	1113189212663230464
808	1047132192462331905
809	1025086949537841153
810	1108197889820499968
811	1062961471603249152
812	1044943497625841664
813	1115802240516640769
814	1063817991836573698
815	1109628215407058945
816	1063876665770536960
817	1113487206851710977
818	1056746159790678016
819	1064127160355454976
820	1110064784035196928
821	1108553721934299137
822	1110380918634622976
823	1110357393752363008
824	1063944477654441985
825	1045063511934554112
826	1107166286352662528
827	1109167654206689280
828	1056225961832841222
829	1035578803769290753
830	1061547712670138369
831	1114936661048213504
832	1035038340339433472
833	1046399424933572608
834	1035059885229174784
835	1110524528046694400
836	1113736281765314560
837	1035890105205047297
838	1115102606223925248
839	1045057635731599360
840	1109627355612569601
841	1115970664081522694
842	1113682957225603073
843	1057586462881918976
844	1106761859665788928
845	1108701838868729858
846	1063360954350649344
847	1107144908761120769
848	1114719527378382848
849	1113632388448436225
850	1114013518599159814
851	1108736292874084352
852	1036243680426946561
853	1063616825680814080
854	1044969029063069696
855	1064215160020262914
856	1037239893250863104
857	1107636692851322880
858	1108878889722527745
859	1035496909455192064
860	1110338081666719744
861	1113951120248975361
862	1109283846711705601
863	1108418491030204416
864	1105162345289056256
865	1062032386458820608
866	1058895092461813760
867	1105481712836833281
868	1106630292448706560
869	1113602452169715713
870	1106897488198414339
871	1056927109527101440
872	1058346206961827840
873	1107462028229267456
874	1115884993845264384
875	1115424316794068993
876	1061475427384991744
877	1116687473030180865
878	1113925574794391552
879	1044777141655785473
880	1109466957135446016
881	1115039604413992960
882	1105219209859084289
883	1053338010165694469
884	1105717299867279361
885	1107870862441660417
886	1063597636803051522
887	1050893497962823682
888	1051646643169320960
889	1055171301273468928
890	1053629970344538115
891	1109093093704429568
892	1113492666166198272
893	1053834535668858880
894	1061028973033836544
895	1108879215074705410
896	1047079512440213505
897	1107319460103364610
898	1114201609511288832
899	1042758412457525248
900	1107522968266125312
901	1106984987579039745
902	1037168753224626177
903	1056939643613077504
904	1114297505913737217
905	1114992396905979904
906	1024421755920834560
907	1108846311820787712
908	1113140770045931520
909	1058131421007659009
910	1113487664316059649
911	1110268934589214726
912	1057068615080574976
913	1109602491757404162
914	1109587982753894400
915	1044259442475315201
916	1110215566181183489
917	1041817632696139776
918	1050366741061267456
919	1114773078490472449
920	1024697239116111872
921	1114504735061446656
922	1062779576508657664
923	1115884889176510464
924	1107572259437404162
925	1057684442896945152
926	1115519278596403200
927	1108376578772398080
928	1109292630662438914
929	1055996421789356037
930	1110497665710592001
931	1106752637494427648
932	1108587921458819072
933	1036086697858134018
934	1036053365896110080
935	1105858533713760257
936	1108675099413172224
937	1043240280114245632
938	1055158479755902976
939	1037218232686522370
940	1116542493229760512
941	1114156833529315330
942	1109182179995717633
943	1113213973174870023
944	1047222355125293056
945	1116083022485266432
946	1062053207847985156
947	1116336742469005314
948	1116501199526744064
949	1113414603604660225
950	1062108654709719040
951	1053962135833726980
952	1106650862338883585
953	1053468884408459267
954	1044427687647948800
955	1055942403327168521
956	1115455748623011840
957	1105811409361883136
958	1108844448727949313
959	1109957345742909442
960	1043187146310463488
961	1105174113935548421
962	1115715421188055041
963	1107416447905468418
964	1042490834594275328
965	1108007483182931968
966	1041740349834616833
967	1059546374327492610
968	1115394167373537280
969	1116415949610024960
970	1115053118457171969
971	1110138593261944832
972	1061856413360648192
973	1062548066689896448
974	1054088592111349761
975	1042435737818464256
976	1105206448282198016
977	1117145709936095232
978	1116480230070325252
979	1113069425585016832
980	1108539260687138817
981	1115686957827461124
982	1035552272447692800
983	1062817276649447426
984	1106556785685479424
985	1061391598859231232
986	1044765476851785728
987	1106542413433044993
988	1113960557005221889
989	1025294792790626304
990	1114591224936181761
991	1105574594952474624
992	1061886948644548608
993	1054025392258871297
994	1043303481447276549
995	1057940317113004033
996	1115370927825485824
997	1114131477132763136
998	1035767032443072513
999	1025267431462326272
1000	1054570122440921088
1001	1109049366797533189
1002	1108582357966053376
1003	1052625834186498048
1004	1113095896634396673
1005	1113844863454334977
1006	1107906777033723904
1007	1115796361901830144
1008	1113968556209836032
1009	1113963670696906752
1010	1058191867223965696
1011	1114377713408671745
1012	1057218427172151296
1013	1109813486501142528
1014	1105507047888572416
1015	1050876531478880256
1016	1055047349465079808
1017	1109474036931837952
1018	1115414135242670080
1019	1058731791262121984
1020	1058129777352232960
1021	1063955175944216576
1022	1108363665219166209
1023	1035377703652712448
1024	1053408633688649728
1025	1035109426728976385
1026	1114324562077016064
1027	1061017836070551553
1028	1115442368147226625
1029	1056141272015101952
1030	1115811638731517954
1031	1114735715013791744
1032	1109992037216980993
1033	1115308190084861953
1034	1035594431263657986
1035	1044590327326224385
1036	1050842864857600001
1037	1114034676509872128
1038	1115419753072533505
1039	1061980580538187782
1040	1050033618024878081
1041	1105677635072544769
1042	1116387770866569218
1043	1110189662059069442
1044	1052559900629499905
1045	1046199891238825986
1046	1055975665365860354
1047	1105852223643246593
1048	1050263323596414976
1049	1049763710695329792
1050	1113146743871250432
1051	1109576231052328960
1052	1036086982160670721
1053	1109079850550247425
1054	1114901700744286210
1055	1115675854749749248
1056	1045227839673573376
1057	1110081201769992192
1058	1107346682210107392
1059	1114822277776863232
1060	1105170382296895488
1061	1107284402394947585
1062	1113842779367649281
1063	1109138485938659333
1064	1107328466976944128
1065	1053653092678463488
1066	1064267653773254656
1067	1058065220889767936
1068	1064034506590441472
1069	1105163751949520897
1070	1051496822676574208
1071	1043074244387561472
1072	1110325624797913088
1073	1115215598227611648
1074	1042543469955362816
1075	1053780382414327808
1076	1051119454304657408
1077	1116672289842651137
1078	1046926693192151040
1079	1056372707795685376
1080	1061246801716555776
1081	1036303714275999744
1082	1057792557823025152
1083	1110103545309790208
1084	1053391327168225280
1085	1109662207892168705
1086	1107104854684532742
1087	1109796782475825157
1088	1051101054488760321
1089	1044882574965952512
1090	1114910521403355139
1091	1115286174812254209
1092	1037000352355295232
1093	1107852697724768256
1094	1105514825017372675
1095	1108047845381144576
1096	1061735338085937152
1097	1105425363004518400
1098	1108634475964047360
1099	1107441090049777665
1100	1107633989190324229
1101	1044085436577140739
1102	1110397786485346304
1103	1108853031729270784
1104	1061569501324550144
1105	1105505623649722368
1106	1110155846821052417
1107	1035676841267355649
1108	1116525605879779330
1109	1114407737050509315
1110	1043503156649439232
1111	1106550399618691077
1112	1105788256426381312
1113	1055873333689020418
1114	1063736801632952320
1115	1117222925206159361
1116	1050089559042740230
1117	1108958003682660354
1118	1105422135596593152
1119	1105657494515470337
1120	1058503246824665089
1121	1108908629741178880
1122	1106518057508323328
1123	1105169626009354240
1124	1108255790903762945
1125	1064150402613039106
1126	1042756198699872257
1127	1059545776353759232
1128	1116671098953916417
1129	1061752722045714437
1130	1057008823641227265
1131	1054494047446929409
1132	1052191770375835648
1133	1109108822289903622
1134	1063879596724998144
1135	1064316742485360645
1136	1062835490863411210
1137	1105562820043780097
1138	1058418703421923330
1139	1051835242728882177
1140	1107700626065145856
1141	1117218016683536384
1142	1116505588916281350
1143	1113903173830365187
1144	1109586904356438016
1145	1114593488786448385
1146	1058342171282194432
1147	1051568110896074757
1148	1107954741873643520
1149	1109515248854142976
1150	1113600941255798784
1151	1117539706768588800
1152	1061519581393620992
1153	1056938083982163969
1154	1114531527185051648
1155	1108415230579752960
1156	1114633724698738691
1157	1054529738943934465
1158	1110189030417690630
1159	1057769211311853568
1160	1109874855187488770
1161	1109293132204728326
1162	1056998237087952896
1163	1115698606470828032
1164	1024649789621731335
1165	1109849723635150848
1166	1057350958286544897
1167	1034956110820794368
1168	1114382965218447360
1169	1106585162098327554
1170	1054016351805861888
1171	1042556873084477440
1172	1108164698015444993
1173	1054188917765758976
1174	1056645751558701056
1175	1108172029021376513
1176	1056892856399523840
1177	1064082982233755650
1178	1050050131180044288
1179	1113626986851782656
1180	1054122913845125120
1181	1109175204922736640
1182	1062434716056539136
1183	1105655283240632320
1184	1105495436155080709
1185	1043314439041167361
1186	1110297534541504517
1187	1042411739256504321
1188	1105546176982667270
1189	1063570496770297856
1190	1055132565596749825
1191	1108473053908885504
1192	1062689537351131137
1193	1043912789599744000
1194	1115722854748672001
1195	1114346556252205057
1196	1025061466813210626
1197	1057733069614964737
1198	1115677521209692160
1199	1056997012636348417
1200	1113607232191631360
1201	1049820931441319936
1202	1044054213465124866
1203	1057107514666508288
1204	1044424202319802374
1205	1107444846221033473
1206	1049904627259445248
1207	1115509887197302784
1208	1105617608194314240
1209	1056392890946072576
1210	1107484718075965440
1211	1064301397859016704
1212	1057638266139279360
1213	1060939068509487106
1214	1106744030522757120
1215	1063488143515635713
1216	1115893021692837888
1217	1115262682993655809
1218	1058278679959273473
1219	1115989507227246594
1220	1059515444619489280
1221	1036087860942790656
1222	1043507659020947456
1223	1105870178338918401
1224	1110239862542794752
1225	1058921099508019200
1226	1064228497760165888
1227	1113889931540279297
1228	1113433700283367424
1229	1042745295988301824
1230	1057426312241983488
1231	1113160874443853824
1232	1058862284125208577
1233	1050421927729393666
1234	1054516504698462208
1235	1042230972857626624
1236	1043273694938898432
1237	1049700470179209217
1238	1057774635339501568
1239	1037412704246530048
1240	1109076984099991552
1241	1108716904871575552
1242	1055893521553453056
1243	1108624172383723522
1244	1107799757722972160
1245	1051452598610464768
1246	1108872672384028672
1247	1116655948808855552
1248	1060998600702869506
1249	1114951291455848451
1250	1051223461610356736
1251	1057121078013816832
1252	1053389848889909248
1253	1108683167215566848
1254	1045175141792022528
1255	1117140135626334208
1256	1058912993453457409
1257	1110224222406823937
1258	1114676972703981568
1259	1114589205131399170
1260	1036230469208231936
1261	1114601762709745664
1262	1116528585517490176
1263	1106604024550297602
1264	1115487698947641344
1265	1050155996662902785
1266	1057790984543789056
1267	1116398279397392390
1268	1050656098456240129
1269	1116077040887840770
1270	1055257460494102528
1271	1037339629010268161
1272	1057043034548985856
1273	1062040734419902464
1274	1055096461992570881
1275	1041767057677864960
1276	1062542274226049025
1277	1107355929497010180
1278	1109110970515902465
1279	1044219044906364928
1280	1113848816250368000
1281	1024189476296450048
1282	1109661111262027781
1283	1109871178326437888
1284	1035067094579073024
1285	1058501627190149124
1286	1114724759764328449
1287	1116372775231459328
1288	1115291868760244227
1289	1107859659547906048
1290	1114154052529664001
1291	1113181993871671296
1292	1116072470942027777
1293	1057883705249857536
1294	1049693934853722112
1295	1105467168236408832
1296	1107426303597309953
1297	1105567954882703361
1298	1036237921995681792
1299	1114965296497008641
1300	1105189787290529802
1301	1054381846664888320
1302	1051216379716747265
1303	1044833045499596801
1304	1050530437502722051
1305	1045052611270004736
1306	1114716003991261184
1307	1052635509862875137
1308	1105842959868723200
1309	1043305515764408321
1310	1115873618616037376
1311	1062984870572347392
1312	1113948231917088768
1313	1105424332732289024
1314	1062035470991863808
1315	1044203270925942787
1316	1058254990026764288
1317	1106656010691731456
1318	1037223864105938949
1319	1116318731003514886
1320	1109968978066227200
1321	1110196247036485632
1322	1105217158466990082
1323	1116511745533722626
1324	1042480219255271424
1325	1115464402180943872
1326	1117256981771898881
1327	1056344074343591936
1328	1063785967230816256
1329	1107058809518854144
1330	1115787719987298304
1331	1106664018314518528
1332	1048780090576789504
1333	1059556490883805184
1334	1115506133211463680
1335	1053298166479667205
1336	1045761147666931718
1337	1107171654721900549
1338	1042818161865908224
1339	1063914035576561665
1340	1037204167159439361
1341	1059450539518226432
1342	1064228006699257856
1343	1110025495796699136
1344	1105502696860278784
1345	1054426607375413248
1346	1057659858160377856
1347	1043500196301295617
1348	1055803384056422400
1349	1049834676175728640
1350	1110042377455132673
1351	1106543269092253697
1352	1053310654331973632
1353	1108179775720435712
1354	1053342014320926721
1355	1058413814700371968
1356	1046040270947721217
1357	1107616768435068928
1358	1109471163217035264
1359	1045990996142694400
1360	1107770025874726913
1361	1105280873895583744
1362	1058513225187278849
1363	1115744106221834240
1364	1041759111845699588
1365	1115302137397956608
1366	1108905728939450368
1367	1107707615893749762
1368	1113936155160932352
1369	1035203534084599809
1370	1107834344540983296
1371	1107010509965004800
1372	1042503112026542081
1373	1046483059732877314
1374	1106994440323780609
1375	1115712552653090816
1376	1105300931632087041
1377	1115903328804835333
1378	1114346703816220674
1379	1107116001630584832
1380	1110378566502490112
1381	1047122282806620162
1382	1054302467607822336
1383	1108480017825189888
1384	1063421503650308096
1385	1105792901429248002
1386	1046080045981323265
1387	1108773928347017216
1388	1108800009695346688
1389	1110424329009971200
1390	1109606360801599488
1391	1057015043525623808
1392	1056699898307993601
1393	1113564912331177986
1394	1035160203300200448
1395	1059504188856635395
1396	1116435607708770304
1397	1044842475523846144
1398	1113586214421041153
1399	1109530563004850176
1400	1024756486696775680
1401	1055844582435491841
1402	1109609717796663303
1403	1105786893961228288
1404	1113095274690379777
1405	1051625955607883776
1406	1105144606960861184
1407	1116628619843870720
1408	1113744672680181760
1409	1114210490022940673
1410	1055295104783544320
1411	1049696114629316608
1412	1105254479358803969
1413	1105548700263346185
1414	1043892493564170245
1415	1053705785165922311
1416	1054722944700637184
1417	1116655661545349121
1418	1113519679107162112
1419	1045136799901929477
1420	1062475392945135618
1421	1056013885440962561
1422	1113868582109229056
1423	1114208652355829760
1424	1024699722827751425
1425	1064067498469978112
1426	1115050049497653248
1427	1114298172464037889
1428	1105609406253809665
1429	1107881886276300800
1430	1059570935899013125
1431	1107516436698689536
1432	1107119208557617152
1433	1037121173274939392
1434	1064077697138257920
1435	1042056794120499207
1436	1056088167495950336
1437	1116442202266329089
1438	1107558013005500416
1439	1115158971357126656
1440	1061653453481623554
1441	1109270000244801541
1442	1043124936854917121
1443	1108561971501244417
1444	1106519373144092677
1445	1110511833755107328
1446	1109801142794571777
1447	1061810264071438337
1448	1042548514415366144
1449	1108823808645849088
1450	1116330429496401920
1451	1057448901479940097
1452	1050188148007948294
1453	1043416678586114048
1454	1106710278509641728
1455	1114268641879646208
1456	1045090327479169024
1457	1045858772894146561
1458	1105314612466147329
1459	1058213915669217281
1460	1062915156282347520
1461	1055927191739875328
1462	1107478202937683968
1463	1058746584802844673
1464	1055820772940361728
1465	1105198680414539777
1466	1113832724547108864
1467	1105247079507677184
1468	1056834474606907393
1469	1110366399510310912
1470	1115086214946799621
1471	1116510476022587393
1472	1116329302692438016
1473	1105038434987577345
1474	1044230257161719814
1475	1109247269105217537
1476	1107651050503233537
1477	1114698703485526016
1478	1046075159780765697
1479	1109223413242040322
1480	1105091717466808320
1481	1116370484608815104
1482	1058441199374290944
1483	1058083520361320450
1484	1105517763878178822
1485	1107448203404812288
1486	1059001882771890177
1487	1107639433573158914
1488	1107361322600030208
1489	1046601869391527938
1490	1063497231393669120
1491	1116682132318035968
1492	1110350965893419013
1493	1055200881187151872
1494	1055981724566462465
1495	1042131837903138817
1496	1114973145008676867
1497	1042315864622608384
1498	1059423157919064064
1499	1050067769608347649
1500	1113962392633798656
1501	1113563439304192000
1502	1061876850945912835
1503	1107237205771198465
1504	1116509667193176064
1505	1106686856362708993
1506	1105852263803822080
1507	1115418112051032064
1508	1115991831496597505
1509	1023958311572570112
1510	1056781668403445760
1511	1114605474588975106
1512	1058443290587160577
1513	1043032894250184705
1514	1044675547597438976
1515	1042990908495413248
1516	1105107942716727297
1517	1106927769391378433
1518	1055280436295872512
1519	1116756992880783361
1520	1115618190569160704
1521	1115334757901111296
1522	1046498376206946306
1523	1108120775272337412
1524	1114385849716805633
1525	1106682795085189121
1526	1044349127973359616
1527	1106589995916238848
1528	1054687701205573632
1529	1035020430590070785
1530	1058820964933353473
1531	1061251195480739840
1532	1105588699285385216
1533	1055191278881853440
1534	1106789636720992256
1535	1044332603107553280
1536	1108587555757256704
1537	1050174922327244800
1538	1108078643048337413
1539	1113215292661010432
1540	1058772529815404545
1541	1113433587775410176
1542	1115457076665491457
1543	1060896081918246912
1544	1045215797478608897
1545	1115378418173059073
1546	1115394899975835649
1547	1053397047024463872
1548	1034895953059356678
1549	1115823785385627648
1550	1050794968657395712
1551	1110221111348740097
1552	1113509433756274688
1553	1105692454664187904
1554	1109559107202269184
1555	1049691350327808005
1556	1108753754151628800
1557	1114298715076878336
1558	1109287554824785922
1559	1058189743320653824
1560	1057803599542173696
1561	1044368484623429632
1562	1034924634569945088
1563	1114724548753141760
1564	1106527366866706433
1565	1107745034290360321
1566	1105300801059254278
1567	1054560148834959360
1568	1114263849685929984
1569	1108867136993280001
1570	1043424812369096704
1571	1055307562692853760
1572	1113945960911183878
1573	1046589891856027648
1574	1055311425768472577
1575	1042737323270725632
1576	1058798017040601092
1577	1056309061635969024
1578	1108792475743735808
1579	1114226801381912577
1580	1056148762530402304
1581	1116342376446996481
1582	1050852152158109698
1583	1105043660981366784
1584	1036018954655985665
1585	1107471407305256960
1586	1058805892710387712
1587	1105482738033811456
1588	1061762991912349697
1589	1106871754499207168
1590	1107522487984840706
1591	1114028186503929856
1592	1107040951388852224
1593	1108410529301688320
1594	1114927655919472641
1595	1115101597380558849
1596	1051217242648506368
1597	1115676878931623938
1598	1054184521774428160
1599	1114653430017142784
1600	1057745188146348040
1601	1113444854284136448
1602	1107719874606977024
1603	1045773899277815808
1604	1034983773207756800
1605	1050214828835516417
1606	1109183655103090689
1607	1115419660969807873
1608	1051336576465170432
1609	1114509769295921157
1610	1108042697481158657
1611	1058296953363202048
1612	1062667300250284032
1613	1045721360239136769
1614	1054405759365087233
1615	1114709573414400000
1616	1110248544668131330
1617	1108171717283852288
1618	1054309131950014464
1619	1114635323542081537
1620	1043266494522523648
1621	1054519284880171008
1622	1057818014744117248
1623	1058943114478567424
1624	1024532978049867777
1625	1115815919757008897
1626	1105567654616678400
1627	1109138674220961792
1628	1035176863965036544
1629	1115752033309614086
1630	1056570924424667137
1631	1057296031912611840
1632	1105504502990417921
1633	1025097881089437701
1634	1042880952836534272
1635	1107863411273023488
1636	1107409721441570816
1637	1109150880903950336
1638	1061349467452915712
1639	1117467839567409154
1640	1057740676534693888
1641	1063625797389426688
1642	1058729328299700225
1643	1105579965180006401
1644	1108698396481736704
1645	1114758349625724928
1646	1107793653957885952
1647	1108900014795952128
1648	1110471675005583362
1649	1057320754382077952
1650	1106654724718321665
1651	1114212884827873280
1652	1116684533070540802
1653	1060908780244951041
1654	1108785190309117952
1655	1024273796457549825
1656	1059028381231210496
1657	1056744663053410305
1658	1062399593231630348
1659	1044319818512424960
1660	1105661992038076417
1661	1113226300402040832
1662	1024951467436896257
1663	1113622253541838848
1664	1063375532929241090
1665	1105106864122064896
1666	1106661410149326848
1667	1108074058040655872
1668	1058461083047002112
1669	1107910922910089221
1670	1110048864826847232
1671	1041729007107092480
1672	1046142106291572737
1673	1116368374328590342
1674	1117120344723218432
1675	1113214951672381446
1676	1058558039131934720
1677	1062138079924965376
1678	1113927161675644928
1679	1062575962666061824
1680	1059460447152291842
1681	1063771196125315072
1682	1055922064102776832
1683	1105676114943344640
1684	1106965544912203777
1685	1056317027365933056
1686	1106704545063858179
1687	1047030227132649473
1688	1063831680429879296
1689	1058749976405131264
1690	1115414400519872512
1691	1035303975237640192
1692	1105184552975241218
1693	1055254172478648320
1694	1115834568190439424
1695	1106556860902137856
1696	1106667508625334272
1697	1115416362053177345
1698	1105554465149644801
1699	1109200492775817217
1700	1114715657176641536
1701	1108749282671235072
1702	1055879554806542337
1703	1061442214553894912
1704	1113883597696634880
1705	1058406117712318469
1706	1108823123401560064
1707	1046030672236892166
1708	1114352454022389760
1709	1105317570704338944
1710	1049866335071739904
1711	1042917657660542976
1712	1109257887371542528
1713	1114990903574372354
1714	1105234019489206272
1715	1024288887454289920
1716	1115005381078659072
1717	1115252652449968128
1718	1056501143432503296
1719	1108565618498899969
1720	1061741889181966336
1721	1108226708992376833
1722	1037235001618825218
1723	1106630922106007552
1724	1061301041746993152
1725	1106543466115461120
1726	1115243417766961152
1727	1114550380631867393
1728	1116494438778507264
1729	1042266565868175360
1730	1110056978397552640
1731	1110194461408182273
1732	1115398071410745344
1733	1053355885991485440
1734	1105863287848226821
1735	1107190594022051841
1736	1109188814340325377
1737	1114218656295260163
1738	1061188440857997312
1739	1116476557646864384
1740	1108837384987332610
1741	1114270141913628672
1742	1054049712595185665
1743	1106577522202996737
1744	1110533011836203013
1745	1107705361535041536
1746	1051754789200121857
1747	1055102491992473601
1748	1058858582429569025
1749	1105345545948852224
1750	1044958573879590912
1751	1043118078609973248
1752	1116068117367721984
1753	1106809903547584512
1754	1042307527709474816
1755	1057318536832528384
1756	1108402512896446464
1757	1109350125892186112
1758	1108564860567240704
1759	1044210145054654466
1760	1115726973765132288
1761	1114994545001766912
1762	1106813533809827840
1763	1064071871048663041
1764	1106657444166393858
1765	1035552096500805632
1766	1107122187402731521
1767	1116813610100109313
1768	1063731521918517248
1769	1045654104247291907
1770	1114421070394732544
1771	1109619056523517952
1772	1108074668848803841
1773	1108921315073769472
1774	1062580899924074496
1775	1049158617486807040
1776	1107693133687603202
1777	1114877776379691008
1778	1107811893350199296
1779	1047150214438637568
1780	1054432084608118784
1781	1052490936087994370
1782	1024019861448667137
1783	1116694753268174851
1784	1056547130431672320
1785	1116334261496315904
1786	1114241329721221120
1787	1107724812351389699
1788	1044840084510511104
1789	1054144726205718528
1790	1113011702302420992
1791	1108491379196510209
1792	1105665256368603136
1793	1061645182431621120
1794	1115446109529411584
1795	1024730009586597888
1796	1105602438927736833
1797	1061767861314695168
1798	1115915973196943360
1799	1114109979995377669
1800	1107360220412551174
1801	1108409100801638406
1802	1045730499816116224
1803	1046519939354554369
1804	1037396636513837058
1805	1115002769029513216
1806	1041937472756871169
1807	1061348330507251712
1808	1116304017108414464
1809	1024086575469277184
1810	1050905928029990912
1811	1046212050374909953
1812	1106777087149522944
1813	1062708986351443969
1814	1045034868810412032
1815	1055269309927383045
1816	1058542067712962560
1817	1058282236779335680
1818	1024156693423382528
1819	1059439567428878337
1820	1107969867318210560
1821	1105198594485874689
1822	1061639854721822720
1823	1108375598236356609
1824	1106705226847977472
1825	1108196525794971648
1826	1107528161980542976
1827	1105245230138380288
1828	1107843753639886849
1829	1024030883723001856
1830	1060940271578419206
1831	1114011925552214016
1832	1115650537570144256
1833	1056176982130606080
1834	1037089375052546050
1835	1105272070093578240
1836	1044458460534984704
1837	1110398568634843136
1838	1107707837193560065
1839	1043286821872914432
1840	1108120559001452544
1841	1114140100865273858
1842	1057878666082807813
1843	1060941943197388801
1844	1055802987438899200
1845	1106770338413715456
1846	1051733343233089536
1847	1115021008107216896
1848	1037441970757677056
1849	1109269254833094656
1850	1035017157493575680
1851	1045776921429200896
1852	1114673045111701506
1853	1062358564507959297
1854	1060939630202249221
1855	1050363173449203713
1856	1106958241949536258
1857	1058466734095646721
1858	1058484773352624128
1859	1114892175966384129
1860	1114527535801491456
1861	1051684729336918017
1862	1037196243380916224
1863	1108548195121025025
1864	1051527460372795393
1865	1109917067329921024
1866	1056459321771520000
1867	1050767498633781248
1868	1105826589189783553
1869	1057467738568847360
1870	1114445394535112704
1871	1054399302511005696
1872	1106982480429625344
1873	1024838659911106560
1874	1108865549830942726
1875	1109459647268823045
1876	1105385900979249152
1877	1061404239971450882
1878	1054425503828971521
1879	1115712309840764929
1880	1045045142313463812
1881	1049786230261596160
1882	1105758389613690882
1883	1109288227641401344
1884	1113880054252089349
1885	1056254777573761024
1886	1105471410431029248
1887	1061068641196826629
1888	1115663539014914050
1889	1105272418313142272
1890	1115619620830961664
1891	1109195543950049282
1892	1108537685097041922
1893	1108492103603142657
1894	1043320328095719426
1895	1060946182950682624
1896	1105357911578951681
1897	1062173403849916416
1898	1053424353843408898
1899	1108838528463654913
1900	1109779292538523648
1901	1113056240454627329
1902	1042509500601782272
1903	1024225937619996677
1904	1108608184195776513
1905	1107347782636130304
1906	1056005452360806400
1907	1113681921660395521
1908	1116425682475732992
1909	1034857570186473474
1910	1055767715863019520
1911	1114464198678011904
1912	1115067250183155713
1913	1117163452068507648
1914	1106694489731751937
1915	1108109244568666113
1916	1108203208365801472
1917	1044972964398157825
1918	1108735979832176640
1919	1108372227039350787
1920	1114523065176735744
1921	1109165313134903300
1922	1105615542306639872
1923	1045915703705042944
1924	1045185918964060160
1925	1053300372775858176
1926	1110269354455851008
1927	1037074794431356928
1928	1037078819662913538
1929	1053368847183446016
1930	1054536415005020160
1931	1063929738576711680
1932	1106706788311810048
1933	1106737795509481472
1934	1056226750022279169
1935	1054520107957960705
1936	1113941355477315586
1937	1055234922787586048
1938	1107308534595809280
1939	1115322834614673408
1940	1057748612472561664
1941	1035565786595639301
1942	1035932216013086720
1943	1109850432602603520
1944	1055132403205840897
1945	1062683387578802176
1946	1047007039275376640
1947	1110372321720786945
1948	1115089530221207554
1949	1115321110940278784
1950	1063629371863441408
1951	1113350782261309440
1952	1050217759114764288
1953	1110392966638530560
1954	1114954502128455681
1955	1037320883319332864
1956	1063438425204891649
1957	1063547052557258753
1958	1058358763177041920
1959	1059455750936973312
1960	1035361284093435904
1961	1117441720965320704
1962	1109851808732798976
1963	1062758534583066624
1964	1110291816929206277
1965	1115435914493345792
1966	1115098911935430657
1967	1024689026513731586
1968	1050950583539122177
1969	1058849308991279104
1970	1052581379274432513
1971	1110171378060353538
1972	1052617226010943489
1973	1046926875090509824
1974	1107027010164064257
1975	1109867785868316674
1976	1050897526583255040
1977	1105166483582320640
1978	1035660097635213314
1979	1114349081130876929
1980	1051470287953453058
1981	1110528045218181120
1982	1051299251400204289
1983	1042429029729497088
1984	1060996557330415617
1985	1105264662638194688
1986	1050403526906695680
1987	1057892553230413825
1988	1063457189900296195
1989	1109457776823144448
1990	1114252567993880576
1991	1105450131145469953
1992	1114747145121411072
1993	1057989381766737920
1994	1114923173424848897
1995	1051059607500537857
1996	1107045641321152512
1997	1105340361591775233
1998	1110272946101276673
[truncated: 1,999 more rows]
