# Supplementary material
Source: ML conference proceedings conference paper supplement (https://aclanthology.org/2021.findings-acl.166)
Supplement: OptionalSupplementaryMaterial [file 2021.findings-acl.166.OptionalSupplementaryMaterial.zip › acl_supplement/data/Dataset/search_terms.txt]

Search terms used to sample from MMHS150k:
wall, card, confederate, maga, islam, sjw, gender, crim, npc, normie, ))), muslim, illegal, caravan, obama, hillary, america
