# Supplementary material
Source: ML conference proceedings conference paper supplement (https://aclanthology.org/2021.findings-acl.166)
Supplement: OptionalSupplementaryMaterial [file 2021.findings-acl.166.OptionalSupplementaryMaterial.zip › acl_supplement/data/Results/Image/NASNet/NASNet_dogwhistle_predictions.csv]

	Multimodal Labels	Unimodal Labels	Predictions
0	tf.Tensor(0, shape=(), dtype=int64)	tf.Tensor(0, shape=(), dtype=int64)	0
1	tf.Tensor(0, shape=(), dtype=int64)	tf.Tensor(0, shape=(), dtype=int64)	1
2	tf.Tensor(0, shape=(), dtype=int64)	tf.Tensor(0, shape=(), dtype=int64)	0
3	tf.Tensor(0, shape=(), dtype=int64)	tf.Tensor(0, shape=(), dtype=int64)	1
4	tf.Tensor(0, shape=(), dtype=int64)	tf.Tensor(0, shape=(), dtype=int64)	0
5	tf.Tensor(0, shape=(), dtype=int64)	tf.Tensor(0, shape=(), dtype=int64)	3
6	tf.Tensor(0, shape=(), dtype=int64)	tf.Tensor(0, shape=(), dtype=int64)	0
7	tf.Tensor(0, shape=(), dtype=int64)	tf.Tensor(0, shape=(), dtype=int64)	0
8	tf.Tensor(0, shape=(), dtype=int64)	tf.Tensor(0, shape=(), dtype=int64)	0
9	tf.Tensor(0, shape=(), dtype=int64)	tf.Tensor(0, shape=(), dtype=int64)	2
10	tf.Tensor(0, shape=(), dtype=int64)	tf.Tensor(0, shape=(), dtype=int64)	0
11	tf.Tensor(0, shape=(), dtype=int64)	tf.Tensor(1, shape=(), dtype=int64)	0
12	tf.Tensor(0, shape=(), dtype=int64)	tf.Tensor(1, shape=(), dtype=int64)	2
13	tf.Tensor(0, shape=(), dtype=int64)	tf.Tensor(0, shape=(), dtype=int64)	0
14	tf.Tensor(0, shape=(), dtype=int64)	tf.Tensor(0, shape=(), dtype=int64)	1
15	tf.Tensor(0, shape=(), dtype=int64)	tf.Tensor(0, shape=(), dtype=int64)	1
16	tf.Tensor(0, shape=(), dtype=int64)	tf.Tensor(0, shape=(), dtype=int64)	1
17	tf.Tensor(0, shape=(), dtype=int64)	tf.Tensor(0, shape=(), dtype=int64)	0
18	tf.Tensor(1, shape=(), dtype=int64)	tf.Tensor(0, shape=(), dtype=int64)	0
19	tf.Tensor(0, shape=(), dtype=int64)	tf.Tensor(0, shape=(), dtype=int64)	0
20	tf.Tensor(0, shape=(), dtype=int64)	tf.Tensor(0, shape=(), dtype=int64)	1
21	tf.Tensor(0, shape=(), dtype=int64)	tf.Tensor(0, shape=(), dtype=int64)	0
22	tf.Tensor(1, shape=(), dtype=int64)	tf.Tensor(0, shape=(), dtype=int64)	0
23	tf.Tensor(0, shape=(), dtype=int64)	tf.Tensor(0, shape=(), dtype=int64)	2
24	tf.Tensor(0, shape=(), dtype=int64)	tf.Tensor(0, shape=(), dtype=int64)	0
25	tf.Tensor(0, shape=(), dtype=int64)	tf.Tensor(0, shape=(), dtype=int64)	0
26	tf.Tensor(1, shape=(), dtype=int64)	tf.Tensor(0, shape=(), dtype=int64)	0
27	tf.Tensor(1, shape=(), dtype=int64)	tf.Tensor(1, shape=(), dtype=int64)	1
28	tf.Tensor(0, shape=(), dtype=int64)	tf.Tensor(0, shape=(), dtype=int64)	1
29	tf.Tensor(0, shape=(), dtype=int64)	tf.Tensor(0, shape=(), dtype=int64)	1
30	tf.Tensor(0, shape=(), dtype=int64)	tf.Tensor(0, shape=(), dtype=int64)	3
31	tf.Tensor(0, shape=(), dtype=int64)	tf.Tensor(0, shape=(), dtype=int64)	0
32	tf.Tensor(0, shape=(), dtype=int64)	tf.Tensor(0, shape=(), dtype=int64)	2
33	tf.Tensor(1, shape=(), dtype=int64)	tf.Tensor(0, shape=(), dtype=int64)	1
34	tf.Tensor(0, shape=(), dtype=int64)	tf.Tensor(0, shape=(), dtype=int64)	0
35	tf.Tensor(0, shape=(), dtype=int64)	tf.Tensor(0, shape=(), dtype=int64)	0
36	tf.Tensor(1, shape=(), dtype=int64)	tf.Tensor(0, shape=(), dtype=int64)	1
37	tf.Tensor(0, shape=(), dtype=int64)	tf.Tensor(0, shape=(), dtype=int64)	2
38	tf.Tensor(0, shape=(), dtype=int64)	tf.Tensor(1, shape=(), dtype=int64)	1
39	tf.Tensor(0, shape=(), dtype=int64)	tf.Tensor(0, shape=(), dtype=int64)	0
40	tf.Tensor(0, shape=(), dtype=int64)	tf.Tensor(0, shape=(), dtype=int64)	0
41	tf.Tensor(0, shape=(), dtype=int64)	tf.Tensor(0, shape=(), dtype=int64)	0
42	tf.Tensor(1, shape=(), dtype=int64)	tf.Tensor(0, shape=(), dtype=int64)	1
43	tf.Tensor(1, shape=(), dtype=int64)	tf.Tensor(0, shape=(), dtype=int64)	1
44	tf.Tensor(0, shape=(), dtype=int64)	tf.Tensor(1, shape=(), dtype=int64)	1
45	tf.Tensor(0, shape=(), dtype=int64)	tf.Tensor(0, shape=(), dtype=int64)	1
46	tf.Tensor(1, shape=(), dtype=int64)	tf.Tensor(3, shape=(), dtype=int64)	3
47	tf.Tensor(1, shape=(), dtype=int64)	tf.Tensor(0, shape=(), dtype=int64)	0
48	tf.Tensor(1, shape=(), dtype=int64)	tf.Tensor(0, shape=(), dtype=int64)	1
49	tf.Tensor(1, shape=(), dtype=int64)	tf.Tensor(0, shape=(), dtype=int64)	1
50	tf.Tensor(0, shape=(), dtype=int64)	tf.Tensor(0, shape=(), dtype=int64)	1
51	tf.Tensor(0, shape=(), dtype=int64)	tf.Tensor(1, shape=(), dtype=int64)	0
52	tf.Tensor(0, shape=(), dtype=int64)	tf.Tensor(0, shape=(), dtype=int64)	0
53	tf.Tensor(0, shape=(), dtype=int64)	tf.Tensor(1, shape=(), dtype=int64)	0
54	tf.Tensor(0, shape=(), dtype=int64)	tf.Tensor(0, shape=(), dtype=int64)	1
55	tf.Tensor(0, shape=(), dtype=int64)	tf.Tensor(0, shape=(), dtype=int64)	0
56	tf.Tensor(0, shape=(), dtype=int64)	tf.Tensor(0, shape=(), dtype=int64)	1
57	tf.Tensor(0, shape=(), dtype=int64)	tf.Tensor(0, shape=(), dtype=int64)	0
58	tf.Tensor(0, shape=(), dtype=int64)	tf.Tensor(0, shape=(), dtype=int64)	0
59	tf.Tensor(0, shape=(), dtype=int64)	tf.Tensor(0, shape=(), dtype=int64)	0
60	tf.Tensor(1, shape=(), dtype=int64)	tf.Tensor(1, shape=(), dtype=int64)	1
61	tf.Tensor(1, shape=(), dtype=int64)	tf.Tensor(0, shape=(), dtype=int64)	0
62	tf.Tensor(0, shape=(), dtype=int64)	tf.Tensor(0, shape=(), dtype=int64)	1
63	tf.Tensor(0, shape=(), dtype=int64)	tf.Tensor(0, shape=(), dtype=int64)	1
64	tf.Tensor(1, shape=(), dtype=int64)	tf.Tensor(1, shape=(), dtype=int64)	1
65	tf.Tensor(0, shape=(), dtype=int64)	tf.Tensor(1, shape=(), dtype=int64)	0
66	tf.Tensor(0, shape=(), dtype=int64)	tf.Tensor(0, shape=(), dtype=int64)	0
67	tf.Tensor(0, shape=(), dtype=int64)	tf.Tensor(0, shape=(), dtype=int64)	3
68	tf.Tensor(1, shape=(), dtype=int64)	tf.Tensor(1, shape=(), dtype=int64)	1
69	tf.Tensor(0, shape=(), dtype=int64)	tf.Tensor(1, shape=(), dtype=int64)	1
70	tf.Tensor(0, shape=(), dtype=int64)	tf.Tensor(0, shape=(), dtype=int64)	0
71	tf.Tensor(0, shape=(), dtype=int64)	tf.Tensor(1, shape=(), dtype=int64)	0
72	tf.Tensor(0, shape=(), dtype=int64)	tf.Tensor(0, shape=(), dtype=int64)	1
73	tf.Tensor(0, shape=(), dtype=int64)	tf.Tensor(0, shape=(), dtype=int64)	1
74	tf.Tensor(1, shape=(), dtype=int64)	tf.Tensor(0, shape=(), dtype=int64)	3
75	tf.Tensor(1, shape=(), dtype=int64)	tf.Tensor(1, shape=(), dtype=int64)	0
76	tf.Tensor(1, shape=(), dtype=int64)	tf.Tensor(0, shape=(), dtype=int64)	0
77	tf.Tensor(1, shape=(), dtype=int64)	tf.Tensor(1, shape=(), dtype=int64)	1
78	tf.Tensor(0, shape=(), dtype=int64)	tf.Tensor(0, shape=(), dtype=int64)	0
79	tf.Tensor(1, shape=(), dtype=int64)	tf.Tensor(0, shape=(), dtype=int64)	0
80	tf.Tensor(0, shape=(), dtype=int64)	tf.Tensor(1, shape=(), dtype=int64)	1
81	tf.Tensor(0, shape=(), dtype=int64)	tf.Tensor(0, shape=(), dtype=int64)	0
82	tf.Tensor(0, shape=(), dtype=int64)	tf.Tensor(0, shape=(), dtype=int64)	0
83	tf.Tensor(0, shape=(), dtype=int64)	tf.Tensor(0, shape=(), dtype=int64)	0
84	tf.Tensor(0, shape=(), dtype=int64)	tf.Tensor(0, shape=(), dtype=int64)	3
85	tf.Tensor(1, shape=(), dtype=int64)	tf.Tensor(0, shape=(), dtype=int64)	1
86	tf.Tensor(0, shape=(), dtype=int64)	tf.Tensor(0, shape=(), dtype=int64)	1
87	tf.Tensor(0, shape=(), dtype=int64)	tf.Tensor(0, shape=(), dtype=int64)	1
88	tf.Tensor(0, shape=(), dtype=int64)	tf.Tensor(0, shape=(), dtype=int64)	0
89	tf.Tensor(0, shape=(), dtype=int64)	tf.Tensor(0, shape=(), dtype=int64)	0
90	tf.Tensor(3, shape=(), dtype=int64)	tf.Tensor(0, shape=(), dtype=int64)	3
91	tf.Tensor(0, shape=(), dtype=int64)	tf.Tensor(0, shape=(), dtype=int64)	1
92	tf.Tensor(0, shape=(), dtype=int64)	tf.Tensor(1, shape=(), dtype=int64)	1
93	tf.Tensor(0, shape=(), dtype=int64)	tf.Tensor(0, shape=(), dtype=int64)	2
94	tf.Tensor(1, shape=(), dtype=int64)	tf.Tensor(0, shape=(), dtype=int64)	0
95	tf.Tensor(1, shape=(), dtype=int64)	tf.Tensor(1, shape=(), dtype=int64)	1
96	tf.Tensor(0, shape=(), dtype=int64)	tf.Tensor(0, shape=(), dtype=int64)	3
97	tf.Tensor(0, shape=(), dtype=int64)	tf.Tensor(3, shape=(), dtype=int64)	0
98	tf.Tensor(0, shape=(), dtype=int64)	tf.Tensor(1, shape=(), dtype=int64)	1
99	tf.Tensor(0, shape=(), dtype=int64)	tf.Tensor(0, shape=(), dtype=int64)	1
100	tf.Tensor(0, shape=(), dtype=int64)	tf.Tensor(0, shape=(), dtype=int64)	3
101	tf.Tensor(0, shape=(), dtype=int64)	tf.Tensor(0, shape=(), dtype=int64)	1
102	tf.Tensor(0, shape=(), dtype=int64)	tf.Tensor(0, shape=(), dtype=int64)	1
103	tf.Tensor(0, shape=(), dtype=int64)	tf.Tensor(0, shape=(), dtype=int64)	0
104	tf.Tensor(0, shape=(), dtype=int64)	tf.Tensor(0, shape=(), dtype=int64)	0
105	tf.Tensor(1, shape=(), dtype=int64)	tf.Tensor(0, shape=(), dtype=int64)	1
106	tf.Tensor(0, shape=(), dtype=int64)	tf.Tensor(0, shape=(), dtype=int64)	0
107	tf.Tensor(1, shape=(), dtype=int64)	tf.Tensor(0, shape=(), dtype=int64)	0
108	tf.Tensor(0, shape=(), dtype=int64)	tf.Tensor(0, shape=(), dtype=int64)	1
109	tf.Tensor(1, shape=(), dtype=int64)	tf.Tensor(0, shape=(), dtype=int64)	0
110	tf.Tensor(0, shape=(), dtype=int64)	tf.Tensor(0, shape=(), dtype=int64)	0
111	tf.Tensor(0, shape=(), dtype=int64)	tf.Tensor(0, shape=(), dtype=int64)	0
112	tf.Tensor(0, shape=(), dtype=int64)	tf.Tensor(0, shape=(), dtype=int64)	1
113	tf.Tensor(0, shape=(), dtype=int64)	tf.Tensor(0, shape=(), dtype=int64)	0
114	tf.Tensor(0, shape=(), dtype=int64)	tf.Tensor(0, shape=(), dtype=int64)	0
115	tf.Tensor(0, shape=(), dtype=int64)	tf.Tensor(0, shape=(), dtype=int64)	0
116	tf.Tensor(1, shape=(), dtype=int64)	tf.Tensor(0, shape=(), dtype=int64)	1
117	tf.Tensor(0, shape=(), dtype=int64)	tf.Tensor(0, shape=(), dtype=int64)	0
118	tf.Tensor(0, shape=(), dtype=int64)	tf.Tensor(0, shape=(), dtype=int64)	0
119	tf.Tensor(0, shape=(), dtype=int64)	tf.Tensor(1, shape=(), dtype=int64)	1
120	tf.Tensor(0, shape=(), dtype=int64)	tf.Tensor(1, shape=(), dtype=int64)	0
121	tf.Tensor(0, shape=(), dtype=int64)	tf.Tensor(0, shape=(), dtype=int64)	0
122	tf.Tensor(0, shape=(), dtype=int64)	tf.Tensor(0, shape=(), dtype=int64)	0
123	tf.Tensor(0, shape=(), dtype=int64)	tf.Tensor(0, shape=(), dtype=int64)	0
124	tf.Tensor(0, shape=(), dtype=int64)	tf.Tensor(1, shape=(), dtype=int64)	1
125	tf.Tensor(0, shape=(), dtype=int64)	tf.Tensor(0, shape=(), dtype=int64)	1
126	tf.Tensor(1, shape=(), dtype=int64)	tf.Tensor(0, shape=(), dtype=int64)	1
127	tf.Tensor(0, shape=(), dtype=int64)	tf.Tensor(0, shape=(), dtype=int64)	0
128	tf.Tensor(0, shape=(), dtype=int64)	tf.Tensor(0, shape=(), dtype=int64)	1
129	tf.Tensor(0, shape=(), dtype=int64)	tf.Tensor(0, shape=(), dtype=int64)	1
130	tf.Tensor(0, shape=(), dtype=int64)	tf.Tensor(0, shape=(), dtype=int64)	0
131	tf.Tensor(0, shape=(), dtype=int64)	tf.Tensor(0, shape=(), dtype=int64)	0
132	tf.Tensor(0, shape=(), dtype=int64)	tf.Tensor(0, shape=(), dtype=int64)	0
133	tf.Tensor(0, shape=(), dtype=int64)	tf.Tensor(1, shape=(), dtype=int64)	1
134	tf.Tensor(0, shape=(), dtype=int64)	tf.Tensor(0, shape=(), dtype=int64)	3
135	tf.Tensor(0, shape=(), dtype=int64)	tf.Tensor(0, shape=(), dtype=int64)	0
136	tf.Tensor(0, shape=(), dtype=int64)	tf.Tensor(0, shape=(), dtype=int64)	0
137	tf.Tensor(1, shape=(), dtype=int64)	tf.Tensor(1, shape=(), dtype=int64)	1
138	tf.Tensor(0, shape=(), dtype=int64)	tf.Tensor(0, shape=(), dtype=int64)	0
139	tf.Tensor(1, shape=(), dtype=int64)	tf.Tensor(0, shape=(), dtype=int64)	1
140	tf.Tensor(0, shape=(), dtype=int64)	tf.Tensor(0, shape=(), dtype=int64)	0
141	tf.Tensor(0, shape=(), dtype=int64)	tf.Tensor(0, shape=(), dtype=int64)	0
142	tf.Tensor(1, shape=(), dtype=int64)	tf.Tensor(0, shape=(), dtype=int64)	1
143	tf.Tensor(0, shape=(), dtype=int64)	tf.Tensor(0, shape=(), dtype=int64)	0
144	tf.Tensor(0, shape=(), dtype=int64)	tf.Tensor(1, shape=(), dtype=int64)	0
145	tf.Tensor(0, shape=(), dtype=int64)	tf.Tensor(0, shape=(), dtype=int64)	0
146	tf.Tensor(0, shape=(), dtype=int64)	tf.Tensor(0, shape=(), dtype=int64)	1
147	tf.Tensor(1, shape=(), dtype=int64)	tf.Tensor(0, shape=(), dtype=int64)	0
148	tf.Tensor(1, shape=(), dtype=int64)	tf.Tensor(0, shape=(), dtype=int64)	0
149	tf.Tensor(1, shape=(), dtype=int64)	tf.Tensor(0, shape=(), dtype=int64)	1
150	tf.Tensor(1, shape=(), dtype=int64)	tf.Tensor(0, shape=(), dtype=int64)	0
151	tf.Tensor(0, shape=(), dtype=int64)	tf.Tensor(0, shape=(), dtype=int64)	1
152	tf.Tensor(0, shape=(), dtype=int64)	tf.Tensor(0, shape=(), dtype=int64)	0
153	tf.Tensor(1, shape=(), dtype=int64)	tf.Tensor(1, shape=(), dtype=int64)	1
154	tf.Tensor(0, shape=(), dtype=int64)	tf.Tensor(0, shape=(), dtype=int64)	0
155	tf.Tensor(0, shape=(), dtype=int64)	tf.Tensor(0, shape=(), dtype=int64)	0
156	tf.Tensor(0, shape=(), dtype=int64)	tf.Tensor(0, shape=(), dtype=int64)	0
157	tf.Tensor(0, shape=(), dtype=int64)	tf.Tensor(0, shape=(), dtype=int64)	0
158	tf.Tensor(0, shape=(), dtype=int64)	tf.Tensor(0, shape=(), dtype=int64)	1
159	tf.Tensor(0, shape=(), dtype=int64)	tf.Tensor(1, shape=(), dtype=int64)	0
160	tf.Tensor(0, shape=(), dtype=int64)	tf.Tensor(1, shape=(), dtype=int64)	1
161	tf.Tensor(0, shape=(), dtype=int64)	tf.Tensor(0, shape=(), dtype=int64)	3
162	tf.Tensor(1, shape=(), dtype=int64)	tf.Tensor(0, shape=(), dtype=int64)	1
163	tf.Tensor(0, shape=(), dtype=int64)	tf.Tensor(0, shape=(), dtype=int64)	3
164	tf.Tensor(0, shape=(), dtype=int64)	tf.Tensor(0, shape=(), dtype=int64)	1
165	tf.Tensor(1, shape=(), dtype=int64)	tf.Tensor(0, shape=(), dtype=int64)	0
166	tf.Tensor(0, shape=(), dtype=int64)	tf.Tensor(0, shape=(), dtype=int64)	0
167	tf.Tensor(1, shape=(), dtype=int64)	tf.Tensor(0, shape=(), dtype=int64)	0
168	tf.Tensor(0, shape=(), dtype=int64)	tf.Tensor(0, shape=(), dtype=int64)	1
169	tf.Tensor(1, shape=(), dtype=int64)	tf.Tensor(0, shape=(), dtype=int64)	1
170	tf.Tensor(0, shape=(), dtype=int64)	tf.Tensor(0, shape=(), dtype=int64)	0
171	tf.Tensor(0, shape=(), dtype=int64)	tf.Tensor(0, shape=(), dtype=int64)	0
172	tf.Tensor(1, shape=(), dtype=int64)	tf.Tensor(1, shape=(), dtype=int64)	1
173	tf.Tensor(0, shape=(), dtype=int64)	tf.Tensor(1, shape=(), dtype=int64)	2
174	tf.Tensor(0, shape=(), dtype=int64)	tf.Tensor(0, shape=(), dtype=int64)	1
175	tf.Tensor(0, shape=(), dtype=int64)	tf.Tensor(0, shape=(), dtype=int64)	0
176	tf.Tensor(1, shape=(), dtype=int64)	tf.Tensor(0, shape=(), dtype=int64)	1
177	tf.Tensor(0, shape=(), dtype=int64)	tf.Tensor(0, shape=(), dtype=int64)	1
178	tf.Tensor(0, shape=(), dtype=int64)	tf.Tensor(0, shape=(), dtype=int64)	1
179	tf.Tensor(0, shape=(), dtype=int64)	tf.Tensor(0, shape=(), dtype=int64)	0
180	tf.Tensor(0, shape=(), dtype=int64)	tf.Tensor(0, shape=(), dtype=int64)	3
181	tf.Tensor(1, shape=(), dtype=int64)	tf.Tensor(0, shape=(), dtype=int64)	1
182	tf.Tensor(0, shape=(), dtype=int64)	tf.Tensor(1, shape=(), dtype=int64)	1
183	tf.Tensor(0, shape=(), dtype=int64)	tf.Tensor(0, shape=(), dtype=int64)	0
184	tf.Tensor(0, shape=(), dtype=int64)	tf.Tensor(1, shape=(), dtype=int64)	0
185	tf.Tensor(0, shape=(), dtype=int64)	tf.Tensor(0, shape=(), dtype=int64)	0
186	tf.Tensor(1, shape=(), dtype=int64)	tf.Tensor(0, shape=(), dtype=int64)	1
187	tf.Tensor(0, shape=(), dtype=int64)	tf.Tensor(0, shape=(), dtype=int64)	0
188	tf.Tensor(0, shape=(), dtype=int64)	tf.Tensor(0, shape=(), dtype=int64)	1
189	tf.Tensor(0, shape=(), dtype=int64)	tf.Tensor(0, shape=(), dtype=int64)	1
190	tf.Tensor(0, shape=(), dtype=int64)	tf.Tensor(1, shape=(), dtype=int64)	1
191	tf.Tensor(0, shape=(), dtype=int64)	tf.Tensor(0, shape=(), dtype=int64)	0
192	tf.Tensor(0, shape=(), dtype=int64)	tf.Tensor(0, shape=(), dtype=int64)	0
193	tf.Tensor(0, shape=(), dtype=int64)	tf.Tensor(0, shape=(), dtype=int64)	1
194	tf.Tensor(0, shape=(), dtype=int64)	tf.Tensor(0, shape=(), dtype=int64)	2
195	tf.Tensor(0, shape=(), dtype=int64)	tf.Tensor(0, shape=(), dtype=int64)	0
196	tf.Tensor(0, shape=(), dtype=int64)	tf.Tensor(0, shape=(), dtype=int64)	0
197	tf.Tensor(0, shape=(), dtype=int64)	tf.Tensor(0, shape=(), dtype=int64)	0
198	tf.Tensor(0, shape=(), dtype=int64)	tf.Tensor(0, shape=(), dtype=int64)	1
199	tf.Tensor(0, shape=(), dtype=int64)	tf.Tensor(0, shape=(), dtype=int64)	1
200	tf.Tensor(1, shape=(), dtype=int64)	tf.Tensor(0, shape=(), dtype=int64)	1
201	tf.Tensor(0, shape=(), dtype=int64)	tf.Tensor(1, shape=(), dtype=int64)	0
202	tf.Tensor(0, shape=(), dtype=int64)	tf.Tensor(0, shape=(), dtype=int64)	0
203	tf.Tensor(0, shape=(), dtype=int64)	tf.Tensor(1, shape=(), dtype=int64)	1
204	tf.Tensor(0, shape=(), dtype=int64)	tf.Tensor(0, shape=(), dtype=int64)	1
205	tf.Tensor(0, shape=(), dtype=int64)	tf.Tensor(0, shape=(), dtype=int64)	1
206	tf.Tensor(0, shape=(), dtype=int64)	tf.Tensor(0, shape=(), dtype=int64)	0
207	tf.Tensor(0, shape=(), dtype=int64)	tf.Tensor(0, shape=(), dtype=int64)	1
208	tf.Tensor(0, shape=(), dtype=int64)	tf.Tensor(0, shape=(), dtype=int64)	1
209	tf.Tensor(0, shape=(), dtype=int64)	tf.Tensor(0, shape=(), dtype=int64)	0
210	tf.Tensor(0, shape=(), dtype=int64)	tf.Tensor(1, shape=(), dtype=int64)	0
211	tf.Tensor(0, shape=(), dtype=int64)	tf.Tensor(0, shape=(), dtype=int64)	2
212	tf.Tensor(1, shape=(), dtype=int64)	tf.Tensor(0, shape=(), dtype=int64)	0
213	tf.Tensor(0, shape=(), dtype=int64)	tf.Tensor(0, shape=(), dtype=int64)	0
214	tf.Tensor(0, shape=(), dtype=int64)	tf.Tensor(1, shape=(), dtype=int64)	1
215	tf.Tensor(0, shape=(), dtype=int64)	tf.Tensor(0, shape=(), dtype=int64)	3
216	tf.Tensor(0, shape=(), dtype=int64)	tf.Tensor(0, shape=(), dtype=int64)	0
217	tf.Tensor(0, shape=(), dtype=int64)	tf.Tensor(0, shape=(), dtype=int64)	1
218	tf.Tensor(0, shape=(), dtype=int64)	tf.Tensor(1, shape=(), dtype=int64)	0
219	tf.Tensor(0, shape=(), dtype=int64)	tf.Tensor(0, shape=(), dtype=int64)	0
220	tf.Tensor(0, shape=(), dtype=int64)	tf.Tensor(0, shape=(), dtype=int64)	0
221	tf.Tensor(0, shape=(), dtype=int64)	tf.Tensor(0, shape=(), dtype=int64)	1
222	tf.Tensor(0, shape=(), dtype=int64)	tf.Tensor(0, shape=(), dtype=int64)	1
223	tf.Tensor(0, shape=(), dtype=int64)	tf.Tensor(0, shape=(), dtype=int64)	1
224	tf.Tensor(1, shape=(), dtype=int64)	tf.Tensor(0, shape=(), dtype=int64)	0
225	tf.Tensor(0, shape=(), dtype=int64)	tf.Tensor(0, shape=(), dtype=int64)	0
226	tf.Tensor(0, shape=(), dtype=int64)	tf.Tensor(1, shape=(), dtype=int64)	1
227	tf.Tensor(0, shape=(), dtype=int64)	tf.Tensor(0, shape=(), dtype=int64)	1
228	tf.Tensor(0, shape=(), dtype=int64)	tf.Tensor(0, shape=(), dtype=int64)	3
229	tf.Tensor(0, shape=(), dtype=int64)	tf.Tensor(0, shape=(), dtype=int64)	0
230	tf.Tensor(0, shape=(), dtype=int64)	tf.Tensor(0, shape=(), dtype=int64)	0
231	tf.Tensor(0, shape=(), dtype=int64)	tf.Tensor(1, shape=(), dtype=int64)	0
232	tf.Tensor(0, shape=(), dtype=int64)	tf.Tensor(0, shape=(), dtype=int64)	0
233	tf.Tensor(0, shape=(), dtype=int64)	tf.Tensor(0, shape=(), dtype=int64)	0
234	tf.Tensor(0, shape=(), dtype=int64)	tf.Tensor(0, shape=(), dtype=int64)	3
235	tf.Tensor(0, shape=(), dtype=int64)	tf.Tensor(0, shape=(), dtype=int64)	3
236	tf.Tensor(0, shape=(), dtype=int64)	tf.Tensor(1, shape=(), dtype=int64)	0
237	tf.Tensor(0, shape=(), dtype=int64)	tf.Tensor(1, shape=(), dtype=int64)	0
238	tf.Tensor(0, shape=(), dtype=int64)	tf.Tensor(1, shape=(), dtype=int64)	1
239	tf.Tensor(1, shape=(), dtype=int64)	tf.Tensor(0, shape=(), dtype=int64)	0
240	tf.Tensor(0, shape=(), dtype=int64)	tf.Tensor(0, shape=(), dtype=int64)	0
241	tf.Tensor(0, shape=(), dtype=int64)	tf.Tensor(0, shape=(), dtype=int64)	0
242	tf.Tensor(0, shape=(), dtype=int64)	tf.Tensor(0, shape=(), dtype=int64)	1
243	tf.Tensor(1, shape=(), dtype=int64)	tf.Tensor(1, shape=(), dtype=int64)	0
244	tf.Tensor(0, shape=(), dtype=int64)	tf.Tensor(1, shape=(), dtype=int64)	1
245	tf.Tensor(1, shape=(), dtype=int64)	tf.Tensor(0, shape=(), dtype=int64)	0
246	tf.Tensor(1, shape=(), dtype=int64)	tf.Tensor(1, shape=(), dtype=int64)	1
247	tf.Tensor(0, shape=(), dtype=int64)	tf.Tensor(1, shape=(), dtype=int64)	0
248	tf.Tensor(0, shape=(), dtype=int64)	tf.Tensor(1, shape=(), dtype=int64)	0
249	tf.Tensor(0, shape=(), dtype=int64)	tf.Tensor(0, shape=(), dtype=int64)	1
250	tf.Tensor(0, shape=(), dtype=int64)	tf.Tensor(0, shape=(), dtype=int64)	1
251	tf.Tensor(0, shape=(), dtype=int64)	tf.Tensor(0, shape=(), dtype=int64)	0
252	tf.Tensor(1, shape=(), dtype=int64)	tf.Tensor(1, shape=(), dtype=int64)	2
253	tf.Tensor(0, shape=(), dtype=int64)	tf.Tensor(0, shape=(), dtype=int64)	0
254	tf.Tensor(0, shape=(), dtype=int64)	tf.Tensor(0, shape=(), dtype=int64)	0
255	tf.Tensor(0, shape=(), dtype=int64)	tf.Tensor(1, shape=(), dtype=int64)	1
256	tf.Tensor(0, shape=(), dtype=int64)	tf.Tensor(0, shape=(), dtype=int64)	3
257	tf.Tensor(1, shape=(), dtype=int64)	tf.Tensor(0, shape=(), dtype=int64)	0
258	tf.Tensor(0, shape=(), dtype=int64)	tf.Tensor(0, shape=(), dtype=int64)	1
259	tf.Tensor(1, shape=(), dtype=int64)	tf.Tensor(0, shape=(), dtype=int64)	1
260	tf.Tensor(1, shape=(), dtype=int64)	tf.Tensor(1, shape=(), dtype=int64)	0
261	tf.Tensor(1, shape=(), dtype=int64)	tf.Tensor(0, shape=(), dtype=int64)	1
262	tf.Tensor(0, shape=(), dtype=int64)	tf.Tensor(0, shape=(), dtype=int64)	1
263	tf.Tensor(1, shape=(), dtype=int64)	tf.Tensor(0, shape=(), dtype=int64)	1
264	tf.Tensor(0, shape=(), dtype=int64)	tf.Tensor(0, shape=(), dtype=int64)	0
265	tf.Tensor(0, shape=(), dtype=int64)	tf.Tensor(0, shape=(), dtype=int64)	0
266	tf.Tensor(0, shape=(), dtype=int64)	tf.Tensor(0, shape=(), dtype=int64)	0
267	tf.Tensor(0, shape=(), dtype=int64)	tf.Tensor(0, shape=(), dtype=int64)	0
268	tf.Tensor(1, shape=(), dtype=int64)	tf.Tensor(0, shape=(), dtype=int64)	0
269	tf.Tensor(1, shape=(), dtype=int64)	tf.Tensor(1, shape=(), dtype=int64)	1
270	tf.Tensor(0, shape=(), dtype=int64)	tf.Tensor(0, shape=(), dtype=int64)	0
271	tf.Tensor(1, shape=(), dtype=int64)	tf.Tensor(0, shape=(), dtype=int64)	1
272	tf.Tensor(0, shape=(), dtype=int64)	tf.Tensor(0, shape=(), dtype=int64)	0
273	tf.Tensor(1, shape=(), dtype=int64)	tf.Tensor(0, shape=(), dtype=int64)	0
274	tf.Tensor(0, shape=(), dtype=int64)	tf.Tensor(0, shape=(), dtype=int64)	0
275	tf.Tensor(1, shape=(), dtype=int64)	tf.Tensor(0, shape=(), dtype=int64)	1
276	tf.Tensor(0, shape=(), dtype=int64)	tf.Tensor(0, shape=(), dtype=int64)	0
277	tf.Tensor(0, shape=(), dtype=int64)	tf.Tensor(0, shape=(), dtype=int64)	0
278	tf.Tensor(0, shape=(), dtype=int64)	tf.Tensor(0, shape=(), dtype=int64)	0
279	tf.Tensor(0, shape=(), dtype=int64)	tf.Tensor(1, shape=(), dtype=int64)	0
280	tf.Tensor(0, shape=(), dtype=int64)	tf.Tensor(0, shape=(), dtype=int64)	1
281	tf.Tensor(0, shape=(), dtype=int64)	tf.Tensor(0, shape=(), dtype=int64)	0
282	tf.Tensor(1, shape=(), dtype=int64)	tf.Tensor(0, shape=(), dtype=int64)	1
283	tf.Tensor(0, shape=(), dtype=int64)	tf.Tensor(1, shape=(), dtype=int64)	0
284	tf.Tensor(0, shape=(), dtype=int64)	tf.Tensor(0, shape=(), dtype=int64)	0
285	tf.Tensor(0, shape=(), dtype=int64)	tf.Tensor(0, shape=(), dtype=int64)	1
286	tf.Tensor(0, shape=(), dtype=int64)	tf.Tensor(0, shape=(), dtype=int64)	1
287	tf.Tensor(0, shape=(), dtype=int64)	tf.Tensor(0, shape=(), dtype=int64)	0
288	tf.Tensor(0, shape=(), dtype=int64)	tf.Tensor(0, shape=(), dtype=int64)	3
289	tf.Tensor(0, shape=(), dtype=int64)	tf.Tensor(0, shape=(), dtype=int64)	0
290	tf.Tensor(0, shape=(), dtype=int64)	tf.Tensor(0, shape=(), dtype=int64)	0
291	tf.Tensor(0, shape=(), dtype=int64)	tf.Tensor(0, shape=(), dtype=int64)	0
292	tf.Tensor(0, shape=(), dtype=int64)	tf.Tensor(0, shape=(), dtype=int64)	1
293	tf.Tensor(0, shape=(), dtype=int64)	tf.Tensor(0, shape=(), dtype=int64)	0
294	tf.Tensor(0, shape=(), dtype=int64)	tf.Tensor(0, shape=(), dtype=int64)	0
295	tf.Tensor(0, shape=(), dtype=int64)	tf.Tensor(0, shape=(), dtype=int64)	0
296	tf.Tensor(1, shape=(), dtype=int64)	tf.Tensor(0, shape=(), dtype=int64)	1
297	tf.Tensor(0, shape=(), dtype=int64)	tf.Tensor(0, shape=(), dtype=int64)	0
298	tf.Tensor(0, shape=(), dtype=int64)	tf.Tensor(0, shape=(), dtype=int64)	0
299	tf.Tensor(1, shape=(), dtype=int64)	tf.Tensor(0, shape=(), dtype=int64)	1
300	tf.Tensor(0, shape=(), dtype=int64)	tf.Tensor(0, shape=(), dtype=int64)	0
301	tf.Tensor(1, shape=(), dtype=int64)	tf.Tensor(0, shape=(), dtype=int64)	0
302	tf.Tensor(0, shape=(), dtype=int64)	tf.Tensor(0, shape=(), dtype=int64)	0
303	tf.Tensor(0, shape=(), dtype=int64)	tf.Tensor(0, shape=(), dtype=int64)	0
304	tf.Tensor(0, shape=(), dtype=int64)	tf.Tensor(0, shape=(), dtype=int64)	0
305	tf.Tensor(0, shape=(), dtype=int64)	tf.Tensor(1, shape=(), dtype=int64)	1
306	tf.Tensor(0, shape=(), dtype=int64)	tf.Tensor(0, shape=(), dtype=int64)	1
307	tf.Tensor(0, shape=(), dtype=int64)	tf.Tensor(0, shape=(), dtype=int64)	0
308	tf.Tensor(0, shape=(), dtype=int64)	tf.Tensor(0, shape=(), dtype=int64)	0
309	tf.Tensor(0, shape=(), dtype=int64)	tf.Tensor(0, shape=(), dtype=int64)	0
310	tf.Tensor(0, shape=(), dtype=int64)	tf.Tensor(0, shape=(), dtype=int64)	0
311	tf.Tensor(0, shape=(), dtype=int64)	tf.Tensor(0, shape=(), dtype=int64)	1
312	tf.Tensor(0, shape=(), dtype=int64)	tf.Tensor(1, shape=(), dtype=int64)	2
313	tf.Tensor(0, shape=(), dtype=int64)	tf.Tensor(0, shape=(), dtype=int64)	1
314	tf.Tensor(0, shape=(), dtype=int64)	tf.Tensor(0, shape=(), dtype=int64)	3
315	tf.Tensor(0, shape=(), dtype=int64)	tf.Tensor(0, shape=(), dtype=int64)	0
316	tf.Tensor(0, shape=(), dtype=int64)	tf.Tensor(1, shape=(), dtype=int64)	1
317	tf.Tensor(0, shape=(), dtype=int64)	tf.Tensor(0, shape=(), dtype=int64)	1
318	tf.Tensor(0, shape=(), dtype=int64)	tf.Tensor(0, shape=(), dtype=int64)	1
319	tf.Tensor(0, shape=(), dtype=int64)	tf.Tensor(0, shape=(), dtype=int64)	1
320	tf.Tensor(0, shape=(), dtype=int64)	tf.Tensor(0, shape=(), dtype=int64)	0
321	tf.Tensor(0, shape=(), dtype=int64)	tf.Tensor(0, shape=(), dtype=int64)	0
322	tf.Tensor(1, shape=(), dtype=int64)	tf.Tensor(0, shape=(), dtype=int64)	1
323	tf.Tensor(0, shape=(), dtype=int64)	tf.Tensor(1, shape=(), dtype=int64)	0
324	tf.Tensor(1, shape=(), dtype=int64)	tf.Tensor(0, shape=(), dtype=int64)	1
325	tf.Tensor(0, shape=(), dtype=int64)	tf.Tensor(1, shape=(), dtype=int64)	1
326	tf.Tensor(0, shape=(), dtype=int64)	tf.Tensor(0, shape=(), dtype=int64)	0
327	tf.Tensor(0, shape=(), dtype=int64)	tf.Tensor(0, shape=(), dtype=int64)	1
328	tf.Tensor(0, shape=(), dtype=int64)	tf.Tensor(0, shape=(), dtype=int64)	3
329	tf.Tensor(0, shape=(), dtype=int64)	tf.Tensor(0, shape=(), dtype=int64)	0
330	tf.Tensor(0, shape=(), dtype=int64)	tf.Tensor(1, shape=(), dtype=int64)	0
331	tf.Tensor(0, shape=(), dtype=int64)	tf.Tensor(0, shape=(), dtype=int64)	0
332	tf.Tensor(0, shape=(), dtype=int64)	tf.Tensor(0, shape=(), dtype=int64)	1
333	tf.Tensor(0, shape=(), dtype=int64)	tf.Tensor(0, shape=(), dtype=int64)	0
334	tf.Tensor(1, shape=(), dtype=int64)	tf.Tensor(0, shape=(), dtype=int64)	1
335	tf.Tensor(0, shape=(), dtype=int64)	tf.Tensor(0, shape=(), dtype=int64)	0
336	tf.Tensor(0, shape=(), dtype=int64)	tf.Tensor(1, shape=(), dtype=int64)	1
337	tf.Tensor(0, shape=(), dtype=int64)	tf.Tensor(0, shape=(), dtype=int64)	0
338	tf.Tensor(0, shape=(), dtype=int64)	tf.Tensor(0, shape=(), dtype=int64)	0
339	tf.Tensor(0, shape=(), dtype=int64)	tf.Tensor(0, shape=(), dtype=int64)	0
340	tf.Tensor(0, shape=(), dtype=int64)	tf.Tensor(1, shape=(), dtype=int64)	0
341	tf.Tensor(0, shape=(), dtype=int64)	tf.Tensor(0, shape=(), dtype=int64)	1
342	tf.Tensor(0, shape=(), dtype=int64)	tf.Tensor(0, shape=(), dtype=int64)	0
343	tf.Tensor(0, shape=(), dtype=int64)	tf.Tensor(0, shape=(), dtype=int64)	0
344	tf.Tensor(0, shape=(), dtype=int64)	tf.Tensor(0, shape=(), dtype=int64)	1
345	tf.Tensor(0, shape=(), dtype=int64)	tf.Tensor(0, shape=(), dtype=int64)	3
346	tf.Tensor(0, shape=(), dtype=int64)	tf.Tensor(1, shape=(), dtype=int64)	1
347	tf.Tensor(1, shape=(), dtype=int64)	tf.Tensor(0, shape=(), dtype=int64)	1
348	tf.Tensor(0, shape=(), dtype=int64)	tf.Tensor(1, shape=(), dtype=int64)	0
349	tf.Tensor(1, shape=(), dtype=int64)	tf.Tensor(0, shape=(), dtype=int64)	1
350	tf.Tensor(0, shape=(), dtype=int64)	tf.Tensor(1, shape=(), dtype=int64)	1
351	tf.Tensor(0, shape=(), dtype=int64)	tf.Tensor(1, shape=(), dtype=int64)	1
352	tf.Tensor(0, shape=(), dtype=int64)	tf.Tensor(0, shape=(), dtype=int64)	1
353	tf.Tensor(0, shape=(), dtype=int64)	tf.Tensor(3, shape=(), dtype=int64)	0
354	tf.Tensor(0, shape=(), dtype=int64)	tf.Tensor(0, shape=(), dtype=int64)	0
355	tf.Tensor(0, shape=(), dtype=int64)	tf.Tensor(0, shape=(), dtype=int64)	0
356	tf.Tensor(0, shape=(), dtype=int64)	tf.Tensor(0, shape=(), dtype=int64)	0
357	tf.Tensor(0, shape=(), dtype=int64)	tf.Tensor(0, shape=(), dtype=int64)	0
358	tf.Tensor(0, shape=(), dtype=int64)	tf.Tensor(1, shape=(), dtype=int64)	1
359	tf.Tensor(0, shape=(), dtype=int64)	tf.Tensor(0, shape=(), dtype=int64)	0
360	tf.Tensor(0, shape=(), dtype=int64)	tf.Tensor(0, shape=(), dtype=int64)	0
361	tf.Tensor(0, shape=(), dtype=int64)	tf.Tensor(0, shape=(), dtype=int64)	0
362	tf.Tensor(0, shape=(), dtype=int64)	tf.Tensor(0, shape=(), dtype=int64)	0
363	tf.Tensor(0, shape=(), dtype=int64)	tf.Tensor(0, shape=(), dtype=int64)	0
364	tf.Tensor(1, shape=(), dtype=int64)	tf.Tensor(1, shape=(), dtype=int64)	1
365	tf.Tensor(0, shape=(), dtype=int64)	tf.Tensor(1, shape=(), dtype=int64)	1
366	tf.Tensor(0, shape=(), dtype=int64)	tf.Tensor(0, shape=(), dtype=int64)	1
367	tf.Tensor(0, shape=(), dtype=int64)	tf.Tensor(0, shape=(), dtype=int64)	0
368	tf.Tensor(0, shape=(), dtype=int64)	tf.Tensor(0, shape=(), dtype=int64)	0
369	tf.Tensor(1, shape=(), dtype=int64)	tf.Tensor(0, shape=(), dtype=int64)	0
370	tf.Tensor(0, shape=(), dtype=int64)	tf.Tensor(0, shape=(), dtype=int64)	1
371	tf.Tensor(1, shape=(), dtype=int64)	tf.Tensor(0, shape=(), dtype=int64)	0
372	tf.Tensor(3, shape=(), dtype=int64)	tf.Tensor(0, shape=(), dtype=int64)	0
373	tf.Tensor(0, shape=(), dtype=int64)	tf.Tensor(0, shape=(), dtype=int64)	3
374	tf.Tensor(0, shape=(), dtype=int64)	tf.Tensor(0, shape=(), dtype=int64)	0
375	tf.Tensor(0, shape=(), dtype=int64)	tf.Tensor(0, shape=(), dtype=int64)	0
376	tf.Tensor(1, shape=(), dtype=int64)	tf.Tensor(0, shape=(), dtype=int64)	1
377	tf.Tensor(0, shape=(), dtype=int64)	tf.Tensor(0, shape=(), dtype=int64)	3
378	tf.Tensor(0, shape=(), dtype=int64)	tf.Tensor(0, shape=(), dtype=int64)	0
379	tf.Tensor(0, shape=(), dtype=int64)	tf.Tensor(0, shape=(), dtype=int64)	1
380	tf.Tensor(0, shape=(), dtype=int64)	tf.Tensor(0, shape=(), dtype=int64)	0
381	tf.Tensor(0, shape=(), dtype=int64)	tf.Tensor(0, shape=(), dtype=int64)	1
382	tf.Tensor(0, shape=(), dtype=int64)	tf.Tensor(0, shape=(), dtype=int64)	0
383	tf.Tensor(0, shape=(), dtype=int64)	tf.Tensor(0, shape=(), dtype=int64)	0
384	tf.Tensor(0, shape=(), dtype=int64)	tf.Tensor(0, shape=(), dtype=int64)	0
385	tf.Tensor(0, shape=(), dtype=int64)	tf.Tensor(0, shape=(), dtype=int64)	0
386	tf.Tensor(0, shape=(), dtype=int64)	tf.Tensor(0, shape=(), dtype=int64)	0
387	tf.Tensor(0, shape=(), dtype=int64)	tf.Tensor(0, shape=(), dtype=int64)	0
388	tf.Tensor(0, shape=(), dtype=int64)	tf.Tensor(1, shape=(), dtype=int64)	0
389	tf.Tensor(0, shape=(), dtype=int64)	tf.Tensor(0, shape=(), dtype=int64)	3
390	tf.Tensor(1, shape=(), dtype=int64)	tf.Tensor(0, shape=(), dtype=int64)	1
391	tf.Tensor(1, shape=(), dtype=int64)	tf.Tensor(1, shape=(), dtype=int64)	1
392	tf.Tensor(0, shape=(), dtype=int64)	tf.Tensor(0, shape=(), dtype=int64)	0
393	tf.Tensor(0, shape=(), dtype=int64)	tf.Tensor(0, shape=(), dtype=int64)	0
394	tf.Tensor(1, shape=(), dtype=int64)	tf.Tensor(0, shape=(), dtype=int64)	0
395	tf.Tensor(0, shape=(), dtype=int64)	tf.Tensor(0, shape=(), dtype=int64)	3
396	tf.Tensor(0, shape=(), dtype=int64)	tf.Tensor(1, shape=(), dtype=int64)	0
397	tf.Tensor(0, shape=(), dtype=int64)	tf.Tensor(0, shape=(), dtype=int64)	0
398	tf.Tensor(0, shape=(), dtype=int64)	tf.Tensor(0, shape=(), dtype=int64)	0
399	tf.Tensor(0, shape=(), dtype=int64)	tf.Tensor(0, shape=(), dtype=int64)	0
400	tf.Tensor(0, shape=(), dtype=int64)	tf.Tensor(0, shape=(), dtype=int64)	0
401	tf.Tensor(0, shape=(), dtype=int64)	tf.Tensor(0, shape=(), dtype=int64)	0
402	tf.Tensor(0, shape=(), dtype=int64)	tf.Tensor(0, shape=(), dtype=int64)	0
403	tf.Tensor(0, shape=(), dtype=int64)	tf.Tensor(1, shape=(), dtype=int64)	1
404	tf.Tensor(0, shape=(), dtype=int64)	tf.Tensor(0, shape=(), dtype=int64)	1
405	tf.Tensor(1, shape=(), dtype=int64)	tf.Tensor(1, shape=(), dtype=int64)	1
406	tf.Tensor(0, shape=(), dtype=int64)	tf.Tensor(1, shape=(), dtype=int64)	1
407	tf.Tensor(0, shape=(), dtype=int64)	tf.Tensor(1, shape=(), dtype=int64)	0
408	tf.Tensor(0, shape=(), dtype=int64)	tf.Tensor(1, shape=(), dtype=int64)	0
409	tf.Tensor(1, shape=(), dtype=int64)	tf.Tensor(1, shape=(), dtype=int64)	0
410	tf.Tensor(0, shape=(), dtype=int64)	tf.Tensor(0, shape=(), dtype=int64)	1
411	tf.Tensor(0, shape=(), dtype=int64)	tf.Tensor(0, shape=(), dtype=int64)	0
412	tf.Tensor(0, shape=(), dtype=int64)	tf.Tensor(0, shape=(), dtype=int64)	3
413	tf.Tensor(1, shape=(), dtype=int64)	tf.Tensor(1, shape=(), dtype=int64)	1
414	tf.Tensor(0, shape=(), dtype=int64)	tf.Tensor(1, shape=(), dtype=int64)	3
415	tf.Tensor(0, shape=(), dtype=int64)	tf.Tensor(0, shape=(), dtype=int64)	0
416	tf.Tensor(1, shape=(), dtype=int64)	tf.Tensor(0, shape=(), dtype=int64)	0
417	tf.Tensor(0, shape=(), dtype=int64)	tf.Tensor(0, shape=(), dtype=int64)	0
418	tf.Tensor(0, shape=(), dtype=int64)	tf.Tensor(0, shape=(), dtype=int64)	0
419	tf.Tensor(0, shape=(), dtype=int64)	tf.Tensor(0, shape=(), dtype=int64)	1
420	tf.Tensor(0, shape=(), dtype=int64)	tf.Tensor(0, shape=(), dtype=int64)	1
421	tf.Tensor(1, shape=(), dtype=int64)	tf.Tensor(0, shape=(), dtype=int64)	0
422	tf.Tensor(0, shape=(), dtype=int64)	tf.Tensor(0, shape=(), dtype=int64)	1
423	tf.Tensor(0, shape=(), dtype=int64)	tf.Tensor(0, shape=(), dtype=int64)	1
424	tf.Tensor(0, shape=(), dtype=int64)	tf.Tensor(0, shape=(), dtype=int64)	3
425	tf.Tensor(0, shape=(), dtype=int64)	tf.Tensor(0, shape=(), dtype=int64)	0
426	tf.Tensor(0, shape=(), dtype=int64)	tf.Tensor(0, shape=(), dtype=int64)	3
427	tf.Tensor(1, shape=(), dtype=int64)	tf.Tensor(1, shape=(), dtype=int64)	1
428	tf.Tensor(1, shape=(), dtype=int64)	tf.Tensor(0, shape=(), dtype=int64)	1
429	tf.Tensor(0, shape=(), dtype=int64)	tf.Tensor(0, shape=(), dtype=int64)	0
430	tf.Tensor(0, shape=(), dtype=int64)	tf.Tensor(0, shape=(), dtype=int64)	0
431	tf.Tensor(1, shape=(), dtype=int64)	tf.Tensor(0, shape=(), dtype=int64)	1
432	tf.Tensor(1, shape=(), dtype=int64)	tf.Tensor(0, shape=(), dtype=int64)	1
433	tf.Tensor(0, shape=(), dtype=int64)	tf.Tensor(1, shape=(), dtype=int64)	0
434	tf.Tensor(0, shape=(), dtype=int64)	tf.Tensor(0, shape=(), dtype=int64)	1
435	tf.Tensor(0, shape=(), dtype=int64)	tf.Tensor(1, shape=(), dtype=int64)	1
436	tf.Tensor(0, shape=(), dtype=int64)	tf.Tensor(1, shape=(), dtype=int64)	0
437	tf.Tensor(0, shape=(), dtype=int64)	tf.Tensor(0, shape=(), dtype=int64)	0
438	tf.Tensor(0, shape=(), dtype=int64)	tf.Tensor(0, shape=(), dtype=int64)	0
439	tf.Tensor(0, shape=(), dtype=int64)	tf.Tensor(0, shape=(), dtype=int64)	1
440	tf.Tensor(0, shape=(), dtype=int64)	tf.Tensor(0, shape=(), dtype=int64)	1
441	tf.Tensor(0, shape=(), dtype=int64)	tf.Tensor(0, shape=(), dtype=int64)	3
442	tf.Tensor(0, shape=(), dtype=int64)	tf.Tensor(0, shape=(), dtype=int64)	0
443	tf.Tensor(0, shape=(), dtype=int64)	tf.Tensor(0, shape=(), dtype=int64)	0
444	tf.Tensor(0, shape=(), dtype=int64)	tf.Tensor(0, shape=(), dtype=int64)	0
445	tf.Tensor(1, shape=(), dtype=int64)	tf.Tensor(0, shape=(), dtype=int64)	1
446	tf.Tensor(0, shape=(), dtype=int64)	tf.Tensor(0, shape=(), dtype=int64)	0
447	tf.Tensor(0, shape=(), dtype=int64)	tf.Tensor(0, shape=(), dtype=int64)	0
448	tf.Tensor(1, shape=(), dtype=int64)	tf.Tensor(0, shape=(), dtype=int64)	1
449	tf.Tensor(0, shape=(), dtype=int64)	tf.Tensor(0, shape=(), dtype=int64)	0
450	tf.Tensor(0, shape=(), dtype=int64)	tf.Tensor(0, shape=(), dtype=int64)	0
451	tf.Tensor(0, shape=(), dtype=int64)	tf.Tensor(0, shape=(), dtype=int64)	0
452	tf.Tensor(0, shape=(), dtype=int64)	tf.Tensor(1, shape=(), dtype=int64)	0
453	tf.Tensor(0, shape=(), dtype=int64)	tf.Tensor(1, shape=(), dtype=int64)	2
454	tf.Tensor(0, shape=(), dtype=int64)	tf.Tensor(0, shape=(), dtype=int64)	0
455	tf.Tensor(0, shape=(), dtype=int64)	tf.Tensor(0, shape=(), dtype=int64)	0
456	tf.Tensor(0, shape=(), dtype=int64)	tf.Tensor(1, shape=(), dtype=int64)	1
457	tf.Tensor(0, shape=(), dtype=int64)	tf.Tensor(0, shape=(), dtype=int64)	0
458	tf.Tensor(0, shape=(), dtype=int64)	tf.Tensor(1, shape=(), dtype=int64)	1
459	tf.Tensor(1, shape=(), dtype=int64)	tf.Tensor(0, shape=(), dtype=int64)	1
460	tf.Tensor(0, shape=(), dtype=int64)	tf.Tensor(0, shape=(), dtype=int64)	0
461	tf.Tensor(0, shape=(), dtype=int64)	tf.Tensor(0, shape=(), dtype=int64)	0
462	tf.Tensor(1, shape=(), dtype=int64)	tf.Tensor(0, shape=(), dtype=int64)	1
463	tf.Tensor(0, shape=(), dtype=int64)	tf.Tensor(0, shape=(), dtype=int64)	0
464	tf.Tensor(0, shape=(), dtype=int64)	tf.Tensor(1, shape=(), dtype=int64)	0
465	tf.Tensor(0, shape=(), dtype=int64)	tf.Tensor(0, shape=(), dtype=int64)	0
466	tf.Tensor(1, shape=(), dtype=int64)	tf.Tensor(0, shape=(), dtype=int64)	1
467	tf.Tensor(1, shape=(), dtype=int64)	tf.Tensor(1, shape=(), dtype=int64)	1
468	tf.Tensor(3, shape=(), dtype=int64)	tf.Tensor(0, shape=(), dtype=int64)	0
469	tf.Tensor(0, shape=(), dtype=int64)	tf.Tensor(0, shape=(), dtype=int64)	1
470	tf.Tensor(0, shape=(), dtype=int64)	tf.Tensor(0, shape=(), dtype=int64)	0
471	tf.Tensor(0, shape=(), dtype=int64)	tf.Tensor(0, shape=(), dtype=int64)	0
472	tf.Tensor(0, shape=(), dtype=int64)	tf.Tensor(0, shape=(), dtype=int64)	0
473	tf.Tensor(0, shape=(), dtype=int64)	tf.Tensor(1, shape=(), dtype=int64)	0
474	tf.Tensor(0, shape=(), dtype=int64)	tf.Tensor(1, shape=(), dtype=int64)	3
475	tf.Tensor(1, shape=(), dtype=int64)	tf.Tensor(1, shape=(), dtype=int64)	0
476	tf.Tensor(0, shape=(), dtype=int64)	tf.Tensor(0, shape=(), dtype=int64)	1
477	tf.Tensor(0, shape=(), dtype=int64)	tf.Tensor(0, shape=(), dtype=int64)	0
478	tf.Tensor(0, shape=(), dtype=int64)	tf.Tensor(0, shape=(), dtype=int64)	0
479	tf.Tensor(0, shape=(), dtype=int64)	tf.Tensor(0, shape=(), dtype=int64)	0
480	tf.Tensor(1, shape=(), dtype=int64)	tf.Tensor(0, shape=(), dtype=int64)	1
481	tf.Tensor(0, shape=(), dtype=int64)	tf.Tensor(1, shape=(), dtype=int64)	1
482	tf.Tensor(0, shape=(), dtype=int64)	tf.Tensor(0, shape=(), dtype=int64)	1
483	tf.Tensor(0, shape=(), dtype=int64)	tf.Tensor(1, shape=(), dtype=int64)	1
484	tf.Tensor(0, shape=(), dtype=int64)	tf.Tensor(0, shape=(), dtype=int64)	0
485	tf.Tensor(0, shape=(), dtype=int64)	tf.Tensor(1, shape=(), dtype=int64)	3
486	tf.Tensor(0, shape=(), dtype=int64)	tf.Tensor(0, shape=(), dtype=int64)	0
487	tf.Tensor(0, shape=(), dtype=int64)	tf.Tensor(0, shape=(), dtype=int64)	0
488	tf.Tensor(1, shape=(), dtype=int64)	tf.Tensor(0, shape=(), dtype=int64)	0
489	tf.Tensor(0, shape=(), dtype=int64)	tf.Tensor(0, shape=(), dtype=int64)	0
490	tf.Tensor(0, shape=(), dtype=int64)	tf.Tensor(0, shape=(), dtype=int64)	3
491	tf.Tensor(1, shape=(), dtype=int64)	tf.Tensor(0, shape=(), dtype=int64)	3
492	tf.Tensor(0, shape=(), dtype=int64)	tf.Tensor(0, shape=(), dtype=int64)	3
493	tf.Tensor(0, shape=(), dtype=int64)	tf.Tensor(0, shape=(), dtype=int64)	1
494	tf.Tensor(0, shape=(), dtype=int64)	tf.Tensor(0, shape=(), dtype=int64)	0
495	tf.Tensor(0, shape=(), dtype=int64)	tf.Tensor(1, shape=(), dtype=int64)	3
496	tf.Tensor(1, shape=(), dtype=int64)	tf.Tensor(0, shape=(), dtype=int64)	1
497	tf.Tensor(0, shape=(), dtype=int64)	tf.Tensor(1, shape=(), dtype=int64)	1
498	tf.Tensor(0, shape=(), dtype=int64)	tf.Tensor(0, shape=(), dtype=int64)	1
499	tf.Tensor(0, shape=(), dtype=int64)	tf.Tensor(0, shape=(), dtype=int64)	1
500	tf.Tensor(0, shape=(), dtype=int64)	tf.Tensor(0, shape=(), dtype=int64)	0
501	tf.Tensor(0, shape=(), dtype=int64)	tf.Tensor(1, shape=(), dtype=int64)	1
