# Supplementary material
Source: ML conference proceedings conference paper supplement (https://aclanthology.org/2021.findings-acl.166)
Supplement: OptionalSupplementaryMaterial [file 2021.findings-acl.166.OptionalSupplementaryMaterial.zip › acl_supplement/data/Results/Image/Xception/Xception_dogwhistle_predictions.csv]

	image_number	Multimodal Labels	Predictions_multimodal	Unimodal Labels	Predictions_unimodal
0	1024252637045239808	0	0	0	0
1	1024780876486455296	0	0	0	0
2	1034736819789750272	0	1	0	1
3	1034939924322115584	0	0	0	0
4	1035003596050452486	0	0	0	0
5	1035324085398593537	0	0	0	0
6	1035508530860548096	0	1	0	1
7	1035866576061382656	0	0	0	0
8	1037037227258200064	0	0	0	0
9	1042067385643958273	0	0	0	0
10	1042072743133544448	0	0	0	0
11	1042085189759975424	0	0	0	0
12	1042153762201071616	0	0	0	0
13	1042240922895953920	0	0	0	0
14	1042283831284379649	0	0	0	0
15	1043040487966474240	0	1	0	1
16	1043413806041456640	0	0	0	0
17	1044321688215859200	0	1	0	1
18	1044448193453412353	0	0	0	0
19	1044571737512390656	0	0	0	0
20	1044710394596675584	0	0	0	0
21	1045142651274752002	0	0	0	0
22	1045937256425553921	0	0	0	0
23	1046950502402002949	0	0	0	0
24	1047023825454600192	0	0	0	0
25	1047176060092211200	0	0	0	0
26	1047185468373135360	0	0	0	0
27	1049519770935148544	0	0	0	0
28	1049868627321729025	0	0	0	0
29	1049935344538460160	0	0	0	0
30	1050412750608842752	0	0	0	0
31	1050532510474625024	0	0	0	0
32	1050545519964119041	0	1	0	1
33	1050825970066890752	0	1	0	1
34	1051291155613110272	0	0	0	0
35	1051486821685882885	0	0	0	0
36	1051527702753230848	0	0	0	0
37	1051730252232318976	0	1	0	1
38	1052559416569020416	0	0	0	0
39	1053293279096139776	0	0	0	0
40	1053349233988911104	0	1	0	1
41	1053703953605525506	0	0	0	0
42	1053708870600810497	0	0	0	0
43	1053866832556425216	0	0	0	0
44	1053964819835961344	0	0	0	0
45	1054138944386990081	0	0	0	0
46	1054174769514512384	0	0	0	0
47	1054366937113743360	0	0	0	0
48	1054605519837523969	0	0	0	0
49	1055273737132654598	0	0	0	0
50	1055289967184920576	0	0	0	0
51	1055899608000446465	0	1	0	1
52	1056225446130532352	0	0	0	0
53	1056247093340196866	0	0	0	0
54	1056358330250215425	0	0	0	0
55	1056686524006305793	0	0	0	0
56	1056699375471210496	0	0	0	0
57	1056706402163572738	0	0	0	0
58	1056736675550892032	0	0	0	0
59	1056800782941671424	0	0	0	0
60	1057034881916641280	0	0	0	0
61	1057057735756390400	0	0	0	0
62	1057075711708725253	0	0	0	0
63	1057090641761574912	0	0	0	0
64	1057338230230671367	0	0	0	0
65	1057713424770183168	0	0	0	0
66	1057730888711241736	0	0	0	0
67	1057748846179241984	0	0	0	0
68	1057757913467535360	0	0	0	0
69	1057798042408095744	0	0	0	0
70	1058130377443893248	0	0	0	0
71	1058202133474902017	0	0	0	0
72	1058318853816664069	0	0	0	0
73	1058517586495893504	0	0	0	0
74	1058538218730258438	0	0	0	0
75	1058592078425276416	0	0	0	0
76	1058606958696108038	0	0	0	0
77	1058874123617677312	0	0	0	0
78	1058994219170312192	0	0	0	0
79	1059508332560613378	0	0	0	0
80	1061008117465530370	0	0	0	0
81	1061220807525961728	0	0	0	0
82	1061334295736995840	0	0	0	0
83	1061491259980693504	0	0	0	0
84	1061520989224239109	0	0	0	0
85	1061654643028226050	0	0	0	0
86	1061805835926429696	0	0	0	0
87	1061828676705230848	0	0	0	0
88	1062266554493136896	0	1	0	1
89	1062437884802809856	0	0	0	0
90	1062494928327073792	0	0	0	0
91	1062879659896041472	0	0	0	0
92	1062913521078419456	0	0	0	0
93	1063599198984130560	0	0	0	0
94	1063602331680301057	0	0	0	0
95	1063897500296364037	0	0	0	0
96	1063902244712656897	0	0	0	0
97	1064007494547042305	0	0	0	0
98	1064171396597784581	0	0	0	0
99	1064265701937041409	0	1	0	1
100	1105098234182029315	0	0	0	0
101	1105115461627404289	0	1	0	1
102	1105124051616448514	0	0	0	0
103	1105194904597209088	0	0	0	0
104	1105200347943981056	0	0	0	0
105	1105244284624822272	0	0	0	0
106	1105261766144114688	0	0	0	0
107	1105285356566519808	0	1	0	1
108	1105404678303608832	0	0	0	0
109	1105404680128118784	0	0	0	0
110	1105497451115544578	0	0	0	0
111	1105574730923429888	0	0	0	0
112	1105580369020112896	0	0	0	0
113	1105600891363737603	0	0	0	0
114	1105609159872077824	0	0	0	0
115	1105620416469585920	0	0	0	0
116	1105659766456487936	0	0	0	0
117	1105700744030760960	0	0	0	0
118	1105870932051152897	0	0	0	0
119	1105875349399834624	0	1	0	1
120	1106524592447856641	0	0	0	0
121	1106580970629681152	0	0	0	0
122	1106602466341195776	0	0	0	0
123	1106619475535777792	0	0	0	0
124	1106657103173902337	0	0	0	0
125	1106660984683405318	0	0	0	0
126	1106692998312665091	0	0	0	0
127	1106742580568621057	0	1	0	1
128	1106748819683848192	0	0	0	0
129	1106805736175292416	0	0	0	0
130	1106825962514247680	0	0	0	0
131	1106828274733334528	0	0	0	0
132	1106860073962426368	0	0	0	0
133	1106995269093285888	0	0	0	0
134	1107016011079974913	0	0	0	0
135	1107387893541232642	0	0	0	0
136	1107502771400372224	0	0	0	0
137	1107628318151581699	0	0	0	0
138	1107677359652642816	0	0	0	0
139	1107679154743451651	0	0	0	0
140	1107733549766098946	0	0	0	0
141	1107749196659130369	0	0	0	0
142	1107795780826480641	0	0	0	0
143	1107796689920946177	0	0	0	0
144	1107801961015975936	0	0	0	0
145	1107882212605784064	0	0	0	0
146	1107894624666845184	0	0	0	0
147	1107968886081634305	0	0	0	0
148	1108000770320850944	0	0	0	0
149	1108023859373113344	0	1	0	1
150	1108075827252600832	0	0	0	0
151	1108081927716827136	0	0	0	0
152	1108097788909375490	0	0	0	0
153	1108182159922266112	0	1	0	1
154	1108301258497187846	0	0	0	0
155	1108326487474745344	0	0	0	0
156	1108398078468517890	0	1	0	1
157	1108400026328489987	0	1	0	1
158	1108434445340758016	0	0	0	0
159	1108543156658864128	0	0	0	0
160	1108546561930219520	0	0	0	0
161	1108764484716429312	0	0	0	0
162	1108783548155219969	0	0	0	0
163	1108818558249824256	0	0	0	0
164	1108865016059576320	0	0	0	0
165	1108892807018758144	0	0	0	0
166	1108907836942225408	0	0	0	0
167	1108931029769682949	0	0	0	0
168	1108946044421705729	0	0	0	0
169	1109102107548893184	0	0	0	0
170	1109124614331027457	0	1	0	1
171	1109150901724504064	0	0	0	0
172	1109182977207087108	0	0	0	0
173	1109195496541900801	0	0	0	0
174	1109244411924434944	0	0	0	0
175	1109294906084937728	0	0	0	0
176	1109342411073994752	0	0	0	0
177	1109602117537464321	0	1	0	1
178	1109631046302072834	0	0	0	0
179	1109671346269753345	0	0	0	0
180	1109673276270411776	0	0	0	0
181	1109720334511558656	0	0	0	0
182	1109746347979108353	0	0	0	0
183	1109806440724774912	0	0	0	0
184	1109842098990313474	0	0	0	0
185	1109859110261018625	0	0	0	0
186	1109870593707515911	0	0	0	0
187	1109881221436198912	0	0	0	0
188	1109963122821992450	0	0	0	0
189	1109999380654948353	0	0	0	0
190	1110023763150532608	0	0	0	0
191	1110029894107332608	0	0	0	0
192	1110257688469032963	0	0	0	0
193	1110342878327439365	0	0	0	0
194	1110349746495983623	0	0	0	0
195	1110368097645547520	0	0	0	0
196	1110377938493599747	0	0	0	0
197	1110441914665320449	0	0	0	0
198	1110445370796965889	0	0	0	0
199	1110448774030204928	0	0	0	0
200	1110516280673660928	0	1	0	1
201	1113017568766373888	0	0	0	0
202	1113117629328261120	0	0	0	0
203	1113131674722807808	0	0	0	0
204	1113142093533380611	0	0	0	0
205	1113147404642082817	0	0	0	0
206	1113188612454137858	0	0	0	0
207	1113222329214095360	0	0	0	0
208	1113426589839241216	0	0	0	0
209	1113517914672566272	0	0	0	0
210	1113575940729085953	0	0	0	0
211	1113619729627979776	0	0	0	0
212	1113656019412901888	0	1	0	1
213	1113661078926495744	0	0	0	0
214	1113687267749564421	0	0	0	0
215	1113699622344482816	0	0	0	0
216	1113840493077630976	0	1	0	1
217	1113875060354367489	0	0	0	0
218	1113898361650909185	0	0	0	0
219	1113916195210764288	0	0	0	0
220	1114074102875213824	0	0	0	0
221	1114179521177985024	0	0	0	0
222	1114218538485469184	0	0	0	0
223	1114218815494086662	0	0	0	0
224	1114244802789273600	0	0	0	0
225	1114248174414323719	0	0	0	0
226	1114365706026536961	0	0	0	0
227	1114373415685840896	0	0	0	0
228	1114451353382690817	0	0	0	0
229	1114484452292538368	0	0	0	0
230	1114492136324341760	0	1	0	1
231	1114581548936892416	0	0	0	0
232	1114645537146449921	0	0	0	0
233	1114758165382307841	0	0	0	0
234	1114769006882361344	0	0	0	0
235	1114880304651673600	0	0	0	0
236	1114975202579030016	0	0	0	0
237	1114976253516423168	0	0	0	0
238	1115049297727213568	0	0	0	0
239	1115142495292334080	0	1	0	1
240	1115265995759923201	0	0	0	0
241	1115270425309777920	0	0	0	0
242	1115276435432853504	0	0	0	0
243	1115305784521392128	0	0	0	0
244	1115308624467955719	0	1	0	1
245	1115322519169507329	0	0	0	0
246	1115412072060342279	0	0	0	0
247	1115521882651004928	0	0	0	0
248	1115640415204593669	0	0	0	0
249	1115651523793518598	0	0	0	0
250	1115746244033503233	0	0	0	0
251	1115797154784776193	0	0	0	0
252	1115899208819777537	0	0	0	0
253	1115902657229619202	0	0	0	0
254	1116002172582420483	0	0	0	0
255	1116035614401601536	0	0	0	0
256	1116042450991075328	0	0	0	0
257	1116281663921762304	0	0	0	0
258	1116308727882223616	0	0	0	0
259	1116351583154049027	0	0	0	0
260	1116375065489231872	0	0	0	0
261	1116380692064210945	0	0	0	0
262	1116399997371781122	0	0	0	0
263	1116513011932512258	0	0	0	0
264	1116865207761022977	0	0	0	0
265	1116898106317201408	0	0	0	0
266	1117096158797676546	0	0	0	0
267	1117147560827871234	0	0	0	0
268	1023952990984654853	1	0	1	0
269	1024077365373227008	1	0	1	0
270	1024257705244946433	1	1	1	1
271	1024495306094854146	1	0	0	0
272	1024805262895579136	1	0	1	0
273	1034860877814673408	1	0	1	0
274	1034867790782423040	1	0	1	0
275	1034877538408062976	1	1	0	1
276	1034877991459979266	1	0	1	0
277	1034928116257382401	1	0	1	0
278	1034967888476524544	1	0	0	0
279	1034977939497144321	1	1	1	1
280	1035149310038618112	1	1	1	1
281	1035244105041891328	1	0	1	0
282	1035262675993935872	1	1	1	1
283	1035914114634272768	1	0	0	0
284	1036281738090041344	1	0	1	0
285	1037037807238184960	1	0	0	0
286	1037392512737001473	1	1	1	1
287	1041824536319090688	1	0	0	0
288	1041860965548130304	1	0	1	0
289	1042151256599482368	1	1	0	1
290	1042217078663593984	1	0	0	0
291	1042266507345096705	1	0	0	0
292	1042352771167477765	1	0	0	0
293	1042675227367333888	1	1	1	1
294	1042860455088156672	1	0	1	0
295	1043504077857071104	1	0	1	0
296	1044036911696957440	1	1	1	1
297	1044177880526270465	1	0	0	0
298	1044314075285639169	1	0	1	0
299	1044325195232595969	1	0	0	0
300	1044605884297437185	1	0	1	0
301	1044626313494110208	1	0	1	0
302	1045085286756208640	1	0	0	0
303	1046268564863238144	1	1	1	1
304	1046275065476775936	1	1	0	1
305	1046414021891706882	1	0	1	0
306	1046904447098544128	1	0	1	0
307	1047135867960143875	1	1	1	1
308	1047233479514017793	1	1	1	1
309	1047257632556417025	1	0	1	0
310	1050128502840651776	1	1	0	1
311	1050152470574456832	1	1	1	1
312	1050391873330786304	1	0	0	0
313	1050710621283643392	1	0	0	0
314	1050792216673886208	1	1	0	1
315	1050852403044605954	1	0	0	0
316	1050995405159165952	1	0	0	0
317	1051130538935939072	1	0	0	0
318	1051275520699244545	1	0	1	0
319	1051332251106066433	1	0	1	0
320	1051581391895433219	1	0	1	0
321	1051752728907661312	1	0	1	0
322	1052580299916230656	1	0	0	0
323	1053452042826670080	1	1	1	1
324	1053702508957388800	1	0	1	0
325	1053788544009945089	1	0	1	0
326	1053841368441737216	1	0	0	0
327	1053894921961304064	1	0	0	0
328	1053993860123242498	1	1	1	1
329	1054051986234953728	1	1	1	1
330	1054119704304992256	1	1	1	1
331	1054145779172954112	1	0	1	0
332	1054149802731155456	1	1	1	1
333	1054485828951404544	1	0	0	0
334	1054508250912108544	1	0	1	0
335	1054560047202742272	1	0	1	0
336	1054707009780625408	1	0	1	0
337	1055244911828713473	1	0	1	0
338	1056441383534379009	1	0	0	0
339	1056522297559998465	1	0	0	0
340	1056592261474082817	1	0	0	0
341	1056701407007592448	1	1	1	1
342	1056767565723246592	1	0	1	0
343	1056975193715826688	1	0	0	0
344	1057001469084426245	1	0	1	0
345	1057003409461649408	1	0	1	0
346	1057088252216311808	1	0	0	0
347	1057098802287521792	1	1	1	1
348	1057159059873378304	1	0	0	0
349	1057430860838760448	1	0	1	0
350	1057431128188039170	1	1	1	1
351	1057577929721462785	1	1	1	1
352	1057742077012905986	1	1	1	1
353	1057842053273567232	1	0	0	0
354	1057986269542780928	1	1	1	1
355	1057987103173365765	1	1	1	1
356	1058004651168149504	1	1	1	1
357	1058091473944625152	1	0	1	0
358	1058103018330165248	1	1	1	1
359	1058123956589346818	1	1	1	1
360	1058464913495150595	1	1	1	1
361	1058511486966874112	1	0	1	0
362	1058837374489292800	1	1	1	1
363	1059477211332235264	1	0	0	0
364	1059530820606742528	1	0	0	0
365	1060923251612966912	1	0	1	0
366	1061076346565287936	1	0	0	0
367	1061251397411315712	1	0	0	0
368	1061356918080454656	1	0	0	0
369	1061357037001543682	1	0	1	0
370	1061388778743496705	1	0	1	0
371	1061400938362101762	1	0	1	0
372	1061662530463064071	1	0	1	0
373	1061742210956357632	1	0	0	0
374	1061808305574764545	1	0	0	0
375	1061910083515248641	1	0	1	0
376	1062316236694908928	1	0	1	0
377	1062350493135982592	1	0	0	0
378	1062450549055021056	1	0	1	0
379	1062470093718937600	1	1	1	1
380	1062734507080667136	1	1	1	1
381	1062801072404672512	1	0	0	0
382	1062808340894490624	1	1	0	1
383	1062819221007032320	1	1	1	1
384	1063440109985517568	1	1	1	1
385	1063451208071999494	1	1	1	1
386	1063451859053174784	1	0	1	0
387	1063577167018156032	1	1	1	1
388	1063853291552063488	1	1	0	1
389	1064189790021668872	1	1	1	1
390	1064239544000831490	1	0	0	0
391	1064253056676696064	1	0	1	0
392	1064367919084097536	1	0	0	0
393	1105293057866506240	1	0	1	0
394	1105476517482688514	1	0	1	0
395	1105564380073287680	1	1	1	1
396	1105649960232591360	1	0	0	0
397	1106546229524213767	1	1	0	1
398	1106593104684027907	1	0	0	0
399	1106675169718951938	1	1	1	1
400	1106768577825304576	1	1	1	1
401	1106957685898051584	1	0	1	0
402	1106960080694583296	1	0	1	0
403	1107213413468565504	1	1	1	1
404	1107282344203952128	1	0	1	0
405	1107347655347314688	1	0	1	0
406	1107354238584274944	1	0	1	0
407	1107369806548922368	1	1	1	1
408	1107819018835103745	1	1	1	1
409	1108038886046007297	1	0	1	0
410	1108564076571975681	1	0	1	0
411	1108701637957300224	1	0	0	0
412	1108785071115460610	1	0	0	0
413	1108804729604313088	1	1	1	1
414	1109208203928240134	1	0	0	0
415	1109416005762056192	1	1	1	1
416	1109446237852450816	1	1	1	1
417	1109890120516284417	1	0	1	0
418	1109957939715018757	1	0	1	0
419	1110311771108184064	1	0	0	0
420	1110364292841439233	1	0	0	0
421	1113043187361374208	1	0	1	0
422	1113225736331067399	1	1	1	1
423	1113420387923255296	1	0	1	0
424	1113439959371911168	1	0	1	0
425	1113612772724682753	1	0	1	0
426	1113738500694859777	1	0	1	0
427	1113888659818917888	1	0	1	0
428	1113900292247044096	1	1	0	1
429	1114041243615604736	1	1	1	1
430	1114205083850477574	1	0	0	0
431	1114248320539435008	1	1	1	1
432	1114271764404756480	1	0	1	0
433	1114280112894169093	1	1	0	1
434	1114290912023257089	1	0	0	0
435	1114333375823740928	1	1	1	1
436	1114484230065664001	1	0	0	0
437	1114589089020301312	1	1	1	1
438	1114714897319960576	1	0	1	0
439	1114784150655909888	1	0	0	0
440	1115100350329917440	1	0	1	0
441	1115155116498149376	1	0	0	0
442	1115162314976649216	1	1	1	1
443	1115384511796264960	1	0	0	0
444	1115425010900848645	1	0	0	0
445	1115437072679153667	1	0	1	0
446	1115796184659103745	1	0	1	0
447	1116044056352702466	1	1	1	1
448	1116052760569548802	1	0	1	0
449	1116066732903419905	1	1	0	1
450	1116648332066213894	1	0	1	0
451	1117309132678287361	1	0	1	0
452	1117517583681507328	1	0	0	0
453	1036246511686963200	2	0	2	0
454	1042440758220005376	2	0	2	0
455	1042755940863418368	2	0	2	0
456	1061527969653501953	2	1	2	1
457	1061883468240560128	2	0	2	0
458	1064325232557768704	2	0	0	0
459	1105269450859786241	2	0	2	0
460	1106865399688118272	2	0	2	0
461	1107508416698896385	2	0	2	0
462	1108386064077651969	2	0	2	0
463	1110221273416646658	2	0	2	0
464	1113407989824786433	2	1	0	1
465	1024604529134907393	3	0	3	0
466	1024707445644570624	3	0	0	0
467	1036211780253569024	3	0	0	0
468	1044695563437068288	3	0	0	0
469	1050194923415396353	3	0	3	0
470	1050396636936118272	3	0	3	0
471	1050853581883154434	3	0	3	0
472	1056899209541038080	3	0	0	0
473	1058113465754247168	3	0	3	0
474	1061161453904834560	3	0	3	0
475	1061653033396985856	3	0	3	0
476	1063787173458137090	3	0	3	0
477	1063901397085839360	3	0	3	0
478	1063991714178846720	3	0	0	0
479	1105218375435862023	3	0	0	0
480	1106707571493220352	3	0	3	0
481	1106835705198710784	3	0	0	0
482	1107364431498043392	3	0	3	0
483	1107753891452645377	3	0	3	0
484	1107761337671643136	3	1	3	1
485	1108081074847051776	3	0	3	0
486	1108547857785806848	3	0	0	0
487	1109688447936143361	3	0	0	0
488	1109867150833934336	3	0	0	0
489	1109903055204638721	3	0	3	0
490	1109903594986319872	3	0	3	0
491	1109983270022844417	3	0	3	0
492	1110282906272976898	3	0	3	0
493	1110370376759103489	3	0	0	0
494	1110531659965833216	3	0	0	0
495	1113423770390343681	3	0	3	0
496	1113596794565464064	3	0	0	0
497	1114610686422863879	3	0	3	0
498	1114750222721323008	3	0	3	0
499	1115660329386676227	3	0	0	0
500	1115769250197565440	3	0	3	0
501	1116483741952741379	3	1	3	1
