# Supplementary material
Source: ML conference proceedings conference paper supplement (https://aclanthology.org/2021.findings-acl.166)
Supplement: OptionalSupplementaryMaterial [file 2021.findings-acl.166.OptionalSupplementaryMaterial.zip › acl_supplement/data/Results/Model_Predictions.csv]

	Tweet ID	Labels	Image_Predictions	LSTM_Predictions	Transformer_Predictions	Multimodal_Predictions
0	1108892807018758144	0	0	0	3	3
1	1115276435432853504	0	0	0	0	0
2	1054560047202742272	1	0	0	1	1
3	1024252637045239808	0	0	0	0	0
4	1053894921961304064	1	0	0	1	1
5	1114271764404756480	1	0	0	0	1
6	1059530820606742528	1	0	1	1	1
7	1116042450991075328	0	0	0	3	0
8	1109244411924434944	0	0	0	0	0
9	1051486821685882885	0	0	0	0	0
10	1106546229524213767	1	1	1	1	1
11	1047176060092211200	0	0	0	0	0
12	1106524592447856641	0	0	0	0	0
13	1043413806041456640	0	0	0	0	0
14	1109999380654948353	0	0	0	0	0
15	1108764484716429312	0	0	0	0	3
16	1107733549766098946	0	0	0	0	0
17	1062450549055021056	1	0	1	1	1
18	1050995405159165952	1	0	1	1	1
19	1058874123617677312	0	0	0	0	0
20	1108182159922266112	0	1	0	0	0
21	1042352771167477765	1	0	1	1	1
22	1051527702753230848	0	0	0	0	0
23	1108931029769682949	0	0	0	1	1
24	1058464913495150595	1	1	1	1	1
25	1107282344203952128	1	0	1	1	1
26	1054605519837523969	0	0	1	1	1
27	1042860455088156672	1	0	1	1	1
28	1056686524006305793	0	0	0	0	0
29	1057034881916641280	0	0	0	0	0
30	1108701637957300224	1	0	0	0	0
31	1107016011079974913	0	0	3	1	1
32	1107502771400372224	0	0	0	0	0
33	1057430860838760448	1	0	1	1	1
34	1115425010900848645	1	0	1	1	1
35	1042440758220005376	2	0	1	1	1
36	1061910083515248641	1	0	1	1	1
37	1105580369020112896	0	0	0	0	0
38	1115769250197565440	3	0	3	3	0
39	1058538218730258438	0	0	0	0	0
40	1051275520699244545	1	0	1	1	1
41	1113900292247044096	1	1	1	1	1
42	1055273737132654598	0	0	1	1	0
43	1116066732903419905	1	1	1	1	1
44	1064189790021668872	1	1	1	1	1
45	1114041243615604736	1	1	1	1	1
46	1056441383534379009	1	0	3	1	0
47	1061076346565287936	1	0	1	1	1
48	1059508332560613378	0	0	0	0	0
49	1114365706026536961	0	0	0	0	0
50	1064325232557768704	2	0	1	1	1
51	1035262675993935872	1	1	1	1	1
52	1062734507080667136	1	1	1	1	1
53	1105870932051152897	0	0	0	0	0
54	1023952990984654853	1	0	1	1	1
55	1050545519964119041	0	1	1	1	1
56	1109842098990313474	0	0	1	0	0
57	1034877538408062976	1	1	1	1	1
58	1054485828951404544	1	0	0	1	1
59	1105115461627404289	0	1	0	0	0
60	1106593104684027907	1	0	0	0	0
61	1107882212605784064	0	0	0	0	0
62	1050853581883154434	3	0	0	3	3
63	1035508530860548096	0	1	0	0	0
64	1105269450859786241	2	0	0	0	0
65	1109720334511558656	0	0	0	0	0
66	1107968886081634305	0	0	0	1	1
67	1050391873330786304	1	0	1	1	1
68	1056358330250215425	0	0	1	1	1
69	1061527969653501953	2	1	1	1	1
70	1052559416569020416	0	0	0	0	0
71	1107508416698896385	2	0	1	1	1
72	1057098802287521792	1	1	1	1	1
73	1051332251106066433	1	0	1	1	1
74	1035866576061382656	0	0	1	1	0
75	1061883468240560128	2	0	1	1	1
76	1115322519169507329	0	0	0	0	0
77	1113407989824786433	2	1	0	1	1
78	1109631046302072834	0	0	0	0	0
79	1062316236694908928	1	0	1	1	1
80	1108818558249824256	0	0	0	0	0
81	1113656019412901888	0	1	0	0	0
82	1113875060354367489	0	0	0	0	0
83	1109671346269753345	0	0	0	0	0
84	1058994219170312192	0	0	0	0	0
85	1061388778743496705	1	0	1	1	1
86	1117517583681507328	1	0	1	1	1
87	1042085189759975424	0	0	1	0	0
88	1106660984683405318	0	0	0	0	0
89	1059477211332235264	1	0	0	1	0
90	1054051986234953728	1	1	1	1	1
91	1110029894107332608	0	0	0	0	0
92	1035244105041891328	1	0	0	1	1
93	1105244284624822272	0	0	0	0	0
94	1105261766144114688	0	0	0	0	0
95	1110311771108184064	1	0	1	1	1
96	1034977939497144321	1	1	1	1	1
97	1061653033396985856	3	0	0	3	0
98	1106825962514247680	0	0	0	0	0
99	1117309132678287361	1	0	1	1	1
100	1108023859373113344	0	1	0	0	0
101	1114290912023257089	1	0	0	0	1
102	1116351583154049027	0	0	3	3	3
103	1064265701937041409	0	1	1	1	1
104	1049519770935148544	0	0	1	1	1
105	1061334295736995840	0	0	0	0	0
106	1108038886046007297	1	0	0	0	0
107	1060923251612966912	1	0	1	1	1
108	1107801961015975936	0	0	0	0	0
109	1047257632556417025	1	0	1	1	1
110	1106860073962426368	0	0	0	0	0
111	1053702508957388800	1	0	1	1	1
112	1114451353382690817	0	0	3	0	0
113	1106580970629681152	0	0	0	0	0
114	1056800782941671424	0	0	1	1	1
115	1058606958696108038	0	0	0	1	0
116	1044695563437068288	3	0	0	3	3
117	1113147404642082817	0	0	0	0	0
118	1034967888476524544	1	0	1	1	1
119	1110023763150532608	0	0	0	0	0
120	1041860965548130304	1	0	1	1	1
121	1109208203928240134	1	0	1	1	1
122	1115155116498149376	1	0	0	0	0
123	1057986269542780928	1	1	1	1	1
124	1051752728907661312	1	0	1	1	1
125	1114218538485469184	0	0	0	0	0
126	1052580299916230656	1	0	1	1	1
127	1049868627321729025	0	0	0	0	0
128	1062801072404672512	1	0	0	1	1
129	1055289967184920576	0	0	0	0	0
130	1061356918080454656	1	0	1	1	1
131	1109890120516284417	1	0	1	1	0
132	1113575940729085953	0	0	3	3	3
133	1109602117537464321	0	1	0	0	0
134	1037037227258200064	0	0	0	1	0
135	1062470093718937600	1	1	1	1	1
136	1061491259980693504	0	0	0	0	0
137	1108546561930219520	0	0	0	0	0
138	1058511486966874112	1	0	1	1	1
139	1115270425309777920	0	0	0	0	0
140	1110445370796965889	0	0	0	0	0
141	1107628318151581699	0	0	0	0	0
142	1114244802789273600	0	0	0	1	1
143	1115651523793518598	0	0	0	0	0
144	1109881221436198912	0	0	0	0	0
145	1113517914672566272	0	0	0	0	0
146	1115899208819777537	0	0	1	1	0
147	1116399997371781122	0	0	0	0	0
148	1034867790782423040	1	0	1	1	1
149	1045085286756208640	1	0	1	1	1
150	1108434445340758016	0	0	0	0	0
151	1047185468373135360	0	0	0	0	0
152	1113142093533380611	0	0	0	0	0
153	1114610686422863879	3	0	0	0	0
154	1116035614401601536	0	0	0	0	0
155	1105649960232591360	1	0	1	1	1
156	1044314075285639169	1	0	1	1	1
157	1058592078425276416	0	0	0	0	0
158	1113661078926495744	0	0	0	0	0
159	1050710621283643392	1	0	0	0	0
160	1057431128188039170	1	1	1	1	0
161	1050532510474625024	0	0	1	1	1
162	1106707571493220352	3	0	0	3	1
163	1042217078663593984	1	0	1	1	1
164	1044177880526270465	1	0	0	1	1
165	1063602331680301057	0	0	1	1	1
166	1044036911696957440	1	1	1	1	1
167	1113117629328261120	0	0	0	1	1
168	1108865016059576320	0	0	0	0	0
169	1106805736175292416	0	0	0	0	0
170	1105700744030760960	0	0	0	0	0
171	1062879659896041472	0	0	1	0	0
172	1115049297727213568	0	0	0	0	0
173	1105124051616448514	0	0	0	0	0
174	1053349233988911104	0	1	0	0	0
175	1057090641761574912	0	0	1	1	1
176	1108907836942225408	0	0	0	0	0
177	1024805262895579136	1	0	1	1	0
178	1057003409461649408	1	0	1	1	1
179	1061828676705230848	0	0	0	0	0
180	1106768577825304576	1	1	0	1	1
181	1051291155613110272	0	0	0	0	0
182	1051130538935939072	1	0	1	1	1
183	1058517586495893504	0	0	1	1	0
184	1114333375823740928	1	1	0	1	1
185	1058130377443893248	0	0	0	0	0
186	1106828274733334528	0	0	3	3	3
187	1035324085398593537	0	0	1	1	0
188	1062808340894490624	1	1	1	1	1
189	1058123956589346818	1	1	1	1	1
190	1114248320539435008	1	1	1	1	1
191	1109867150833934336	3	0	0	3	0
192	1057798042408095744	0	0	0	0	0
193	1110370376759103489	3	0	0	0	0
194	1115412072060342279	0	0	0	0	0
195	1106657103173902337	0	0	0	1	0
196	1116898106317201408	0	0	0	0	0
197	1108081927716827136	0	0	0	0	0
198	1061400938362101762	1	0	0	1	1
199	1034939924322115584	0	0	1	1	1
200	1042151256599482368	1	1	1	1	1
201	1057577929721462785	1	1	1	1	1
202	1115384511796264960	1	0	1	1	1
203	1062494928327073792	0	0	1	1	1
204	1105875349399834624	0	1	0	0	3
205	1057842053273567232	1	0	1	1	1
206	1063897500296364037	0	0	1	1	0
207	1035914114634272768	1	0	1	1	1
208	1108804729604313088	1	1	1	1	1
209	1113687267749564421	0	0	0	0	0
210	1050825970066890752	0	1	0	1	1
211	1110368097645547520	0	0	0	1	0
212	1110531659965833216	3	0	0	3	0
213	1050412750608842752	0	0	1	1	1
214	1053964819835961344	0	0	0	0	0
215	1106619475535777792	0	0	0	0	0
216	1114784150655909888	1	0	1	1	1
217	1044321688215859200	0	1	0	0	0
218	1042266507345096705	1	0	1	1	1
219	1114645537146449921	0	0	0	3	0
220	1042072743133544448	0	0	0	0	0
221	1046950502402002949	0	0	0	1	1
222	1057987103173365765	1	1	1	1	1
223	1063902244712656897	0	0	0	1	0
224	1114976253516423168	0	0	0	0	0
225	1108564076571975681	1	0	0	1	1
226	1057088252216311808	1	0	1	1	1
227	1053841368441737216	1	0	1	1	1
228	1109983270022844417	3	0	0	0	0
229	1046275065476775936	1	1	1	1	1
230	1106835705198710784	3	0	3	0	0
231	1108543156658864128	0	0	0	0	0
232	1113596794565464064	3	0	1	1	1
233	1113188612454137858	0	0	0	1	0
234	1063991714178846720	3	0	1	1	1
235	1113916195210764288	0	0	0	1	1
236	1110441914665320449	0	0	0	3	0
237	1047023825454600192	0	0	1	0	0
238	1108097788909375490	0	0	0	1	3
239	1062437884802809856	0	0	0	0	0
240	1105194904597209088	0	0	0	0	0
241	1105600891363737603	0	0	0	0	0
242	1053866832556425216	0	0	1	1	0
243	1107795780826480641	0	0	3	3	3
244	1107387893541232642	0	0	0	0	0
245	1114373415685840896	0	0	0	0	0
246	1113840493077630976	0	1	0	0	0
247	1061662530463064071	1	0	1	1	1
248	1050152470574456832	1	1	1	1	1
249	1106960080694583296	1	0	1	1	1
250	1109446237852450816	1	1	1	1	1
251	1057748846179241984	0	0	1	0	0
252	1116308727882223616	0	0	1	0	0
253	1109102107548893184	0	0	0	0	0
254	1106865399688118272	2	0	0	0	1
255	1109416005762056192	1	1	1	1	1
256	1063599198984130560	0	0	1	1	1
257	1113439959371911168	1	0	1	1	1
258	1116375065489231872	0	0	0	0	0
259	1105497451115544578	0	0	0	1	1
260	1109903594986319872	3	0	0	3	3
261	1115796184659103745	1	0	0	1	0
262	1036281738090041344	1	0	1	0	1
263	1109806440724774912	0	0	0	0	0
264	1064239544000831490	1	0	0	1	1
265	1115746244033503233	0	0	0	0	0
266	1058103018330165248	1	1	1	1	1
267	1058202133474902017	0	0	0	0	0
268	1108301258497187846	0	0	0	0	0
269	1116380692064210945	0	0	0	0	0
270	1034928116257382401	1	0	1	1	1
271	1036246511686963200	2	0	0	1	0
272	1115660329386676227	3	0	0	0	3
273	1054508250912108544	1	0	1	1	1
274	1109903055204638721	3	0	3	3	3
275	1114758165382307841	0	0	0	0	0
276	1053788544009945089	1	0	1	1	1
277	1024077365373227008	1	0	0	1	1
278	1064367919084097536	1	0	0	1	0
279	1024604529134907393	3	0	3	3	3
280	1108400026328489987	0	1	0	0	0
281	1109195496541900801	0	0	0	0	0
282	1047135867960143875	1	1	1	1	1
283	1114218815494086662	0	0	0	1	1
284	1116281663921762304	0	0	0	0	0
285	1109963122821992450	0	0	0	0	0
286	1109859110261018625	0	0	0	3	0
287	1114248174414323719	0	0	0	0	0
288	1106957685898051584	1	0	1	1	0
289	1034877991459979266	1	0	1	1	1
290	1113222329214095360	0	0	0	0	0
291	1064253056676696064	1	0	1	1	1
292	1107364431498043392	3	0	0	0	3
293	1056736675550892032	0	0	0	0	0
294	1108081074847051776	3	0	0	0	0
295	1054119704304992256	1	1	1	1	1
296	1113738500694859777	1	0	1	1	1
297	1108326487474745344	0	0	0	0	0
298	1107894624666845184	0	0	0	0	0
299	1113898361650909185	0	0	0	0	0
300	1114484230065664001	1	0	1	1	1
301	1109688447936143361	3	0	3	3	3
302	1107679154743451651	0	0	0	0	0
303	1053708870600810497	0	0	1	0	0
304	1034736819789750272	0	1	0	0	0
305	1063787173458137090	3	0	3	3	3
306	1035149310038618112	1	1	1	1	1
307	1116483741952741379	3	1	0	3	0
308	1114179521177985024	0	0	1	1	1
309	1117147560827871234	0	0	3	0	0
310	1056767565723246592	1	0	1	1	1
311	1043504077857071104	1	0	0	1	1
312	1057057735756390400	0	0	0	1	0
313	1110282906272976898	3	0	0	0	0
314	1061742210956357632	1	0	1	1	1
315	1062266554493136896	0	1	0	0	0
316	1064007494547042305	0	0	0	1	0
317	1047233479514017793	1	1	1	1	1
318	1061251397411315712	1	0	1	1	1
319	1056699375471210496	0	0	0	0	1
320	1054174769514512384	0	0	0	0	0
321	1109673276270411776	0	0	0	3	0
322	1050792216673886208	1	1	1	1	1
323	1107761337671643136	3	1	0	3	3
324	1113888659818917888	1	0	1	1	0
325	1050194923415396353	3	0	1	1	1
326	1114975202579030016	0	0	0	0	0
327	1116044056352702466	1	1	0	1	1
328	1057757913467535360	0	0	0	0	0
329	1061520989224239109	0	0	0	0	0
330	1051581391895433219	1	0	1	1	1
331	1109150901724504064	0	0	0	0	0
332	1056225446130532352	0	0	0	3	1
333	1114581548936892416	0	0	0	0	0
334	1035003596050452486	0	0	3	0	3
335	1063440109985517568	1	1	1	1	1
336	1114589089020301312	1	1	1	1	1
337	1057001469084426245	1	0	1	1	1
338	1108386064077651969	2	0	0	0	3
339	1042067385643958273	0	0	0	0	0
340	1042153762201071616	0	0	0	0	0
341	1037037807238184960	1	0	0	1	3
342	1116648332066213894	1	0	0	0	0
343	1034860877814673408	1	0	1	1	1
344	1107796689920946177	0	0	0	0	0
345	1056701407007592448	1	1	0	1	1
346	1042755940863418368	2	0	1	1	1
347	1113017568766373888	0	0	0	0	0
348	1061161453904834560	3	0	3	0	0
349	1106675169718951938	1	1	1	1	1
350	1110364292841439233	1	0	0	0	0
351	1113423770390343681	3	0	0	3	3
352	1063853291552063488	1	1	1	1	1
353	1105609159872077824	0	0	0	0	0
354	1061220807525961728	0	0	0	0	0
355	1054149802731155456	1	1	1	1	1
356	1114205083850477574	1	0	1	1	1
357	1116002172582420483	0	0	1	1	1
358	1063451859053174784	1	0	1	1	1
359	1062819221007032320	1	1	1	1	1
360	1041824536319090688	1	0	1	1	0
361	1061805835926429696	0	0	0	0	0
362	1062913521078419456	0	0	0	0	0
363	1108547857785806848	3	0	0	3	3
364	1107753891452645377	3	0	0	0	0
365	1110257688469032963	0	0	0	0	0
366	1114484452292538368	0	0	0	0	0
367	1042675227367333888	1	1	1	1	1
368	1105574730923429888	0	0	0	0	0
369	1105659766456487936	0	0	0	0	3
370	1109870593707515911	0	0	0	0	0
371	1063451208071999494	1	1	1	0	1
372	1061654643028226050	0	0	1	0	0
373	1109746347979108353	0	0	0	0	0
374	1109182977207087108	0	0	0	0	0
375	1113043187361374208	1	0	1	1	1
376	1114750222721323008	3	0	0	0	0
377	1107369806548922368	1	1	1	1	1
378	1115162314976649216	1	1	1	1	1
379	1057713424770183168	0	0	0	0	0
380	1044710394596675584	0	0	0	0	0
381	1105564380073287680	1	1	1	1	1
382	1061008117465530370	0	0	0	1	0
383	1109124614331027457	0	1	0	1	0
384	1107749196659130369	0	0	0	0	0
385	1107819018835103745	1	1	1	1	1
386	1105098234182029315	0	0	0	0	0
387	1061808305574764545	1	0	0	1	1
388	1109294906084937728	0	0	0	0	0
389	1044626313494110208	1	0	1	1	1
390	1054366937113743360	0	0	0	0	1
391	1107354238584274944	1	0	0	1	1
392	1062350493135982592	1	0	1	1	1
393	1057075711708725253	0	0	0	0	0
394	1045937256425553921	0	0	1	1	0
395	1107347655347314688	1	0	1	1	1
396	1106602466341195776	0	0	0	0	0
397	1105218375435862023	3	0	0	0	0
398	1110516280673660928	0	1	0	0	0
399	1042240922895953920	0	0	0	1	0
400	1036211780253569024	3	0	1	1	1
401	1042283831284379649	0	0	1	1	1
402	1115797154784776193	0	0	3	3	3
403	1053993860123242498	1	1	1	1	1
404	1113612772724682753	1	0	0	3	0
405	1110377938493599747	0	0	0	0	0
406	1056975193715826688	1	0	1	1	1
407	1106692998312665091	0	0	0	0	0
408	1113619729627979776	0	0	0	0	0
409	1110342878327439365	0	0	0	0	0
410	1054145779172954112	1	0	0	1	1
411	1055899608000446465	0	1	0	0	0
412	1056899209541038080	3	0	1	1	1
413	1114280112894169093	1	1	1	1	1
414	1115902657229619202	0	0	0	0	0
415	1049935344538460160	0	0	0	0	0
416	1110349746495983623	0	0	0	0	0
417	1109957939715018757	1	0	1	1	1
418	1046268564863238144	1	1	0	1	1
419	1114769006882361344	0	0	0	0	0
420	1105293057866506240	1	0	0	0	0
421	1114074102875213824	0	0	1	1	1
422	1113225736331067399	1	1	1	1	1
423	1110221273416646658	2	0	1	1	0
424	1058113465754247168	3	0	3	0	0
425	1116865207761022977	0	0	0	0	0
426	1056247093340196866	0	0	0	0	0
427	1115437072679153667	1	0	0	0	1
428	1046904447098544128	1	0	1	1	1
429	1024257705244946433	1	1	1	1	1
430	1105620416469585920	0	0	0	0	0
431	1063901397085839360	3	0	1	1	1
432	1113131674722807808	0	0	0	0	0
433	1057338230230671367	0	0	0	0	0
434	1058091473944625152	1	0	1	1	1
435	1107677359652642816	0	0	0	0	0
436	1115521882651004928	0	0	0	0	0
437	1114714897319960576	1	0	1	1	1
438	1054707009780625408	1	0	1	1	1
439	1106742580568621057	0	1	0	1	0
440	1115142495292334080	0	1	0	0	0
441	1056522297559998465	1	0	1	0	1
442	1064171396597784581	0	0	0	0	0
443	1050396636936118272	3	0	0	3	3
444	1106748819683848192	0	0	0	0	0
445	1106995269093285888	0	0	0	1	0
446	1115308624467955719	0	1	0	0	0
447	1115640415204593669	0	0	0	0	0
448	1116052760569548802	1	0	1	1	1
449	1105476517482688514	1	0	1	1	1
450	1108783548155219969	0	0	0	0	0
451	1050128502840651776	1	1	0	1	0
452	1108075827252600832	0	0	0	0	0
453	1113699622344482816	0	0	0	1	1
454	1046414021891706882	1	0	0	1	1
455	1044571737512390656	0	0	0	0	0
456	1105285356566519808	0	1	0	0	0
457	1044325195232595969	1	0	1	1	0
458	1050852403044605954	1	0	1	1	1
459	1055244911828713473	1	0	1	1	1
460	1105404678303608832	0	0	0	0	0
461	1058318853816664069	0	0	1	1	1
462	1115265995759923201	0	0	0	0	0
463	1113426589839241216	0	0	0	0	0
464	1024707445644570624	3	0	1	1	1
465	1105200347943981056	0	0	0	0	0
466	1045142651274752002	0	0	1	0	0
467	1044605884297437185	1	0	1	1	1
468	1058004651168149504	1	1	1	1	1
469	1110448774030204928	0	0	0	0	0
470	1108785071115460610	1	0	0	1	1
471	1109342411073994752	0	0	0	0	0
472	1115100350329917440	1	0	1	1	1
473	1056706402163572738	0	0	0	1	1
474	1105404680128118784	0	0	0	0	0
475	1057730888711241736	0	0	1	1	1
476	1057742077012905986	1	1	0	0	0
477	1113420387923255296	1	0	1	1	1
478	1051730252232318976	0	1	0	0	0
479	1053293279096139776	0	0	0	1	0
480	1108946044421705729	0	0	0	0	0
481	1114880304651673600	0	0	1	0	0
482	1024495306094854146	1	0	1	1	1
483	1061357037001543682	1	0	0	1	1
484	1107213413468565504	1	1	1	1	1
485	1063577167018156032	1	1	1	1	1
486	1056592261474082817	1	0	1	1	1
487	1116513011932512258	0	0	3	3	1
488	1043040487966474240	0	1	1	1	1
489	1108000770320850944	0	0	0	0	0
490	1024780876486455296	0	0	0	0	0
491	1054138944386990081	0	0	0	0	0
492	1044448193453412353	0	0	0	3	3
493	1117096158797676546	0	0	0	0	0
494	1114492136324341760	0	1	0	0	0
495	1037392512737001473	1	1	1	1	1
496	1057159059873378304	1	0	1	1	1
497	1053703953605525506	0	0	1	3	1
498	1053452042826670080	1	1	1	1	1
499	1115305784521392128	0	0	0	0	0
500	1108398078468517890	0	1	1	0	0
501	1058837374489292800	1	1	1	1	1
