# Supplementary material
Source: ML conference proceedings conference paper supplement (https://aclanthology.org/2021.findings-acl.166)
Supplement: OptionalSupplementaryMaterial [file 2021.findings-acl.166.OptionalSupplementaryMaterial.zip › acl_supplement/data/Results/Multimodal/MMBT/config.json]

{
  "architectures": [
    "MMBTForClassification"
  ],
  "attention_probs_dropout_prob": 0.1,
  "hidden_act": "gelu",
  "hidden_dropout_prob": 0.1,
  "hidden_size": 1024,
  "id2label": {
    "0": "LABEL_0",
    "1": "LABEL_1",
    "2": "LABEL_2",
    "3": "LABEL_3"
  },
  "initializer_range": 0.02,
  "intermediate_size": 4096,
  "label2id": {
    "LABEL_0": 0,
    "LABEL_1": 1,
    "LABEL_2": 2,
    "LABEL_3": 3
  },
  "layer_norm_eps": 1e-12,
  "max_position_embeddings": 512,
  "modal_hidden_size": 2048,
  "model_type": "bert",
  "num_attention_heads": 16,
  "num_hidden_layers": 24,
  "num_labels": 4,
  "pad_token_id": 0,
  "type_vocab_size": 2,
  "vocab_size": 30522
}
