# Supplementary material
Source: ML conference proceedings conference paper supplement (https://aclanthology.org/2021.findings-acl.166)
Supplement: OptionalSupplementaryMaterial [file 2021.findings-acl.166.OptionalSupplementaryMaterial.zip › acl_supplement/data/Results/Text/AlBERT/AlBERT_dogwhistle_predictions.csv]

	Labels	Predictions
0	0	3
1	0	0
2	1	0
3	0	0
4	1	0
5	1	0
6	1	1
7	0	3
8	0	0
9	0	0
10	1	1
11	0	0
12	0	0
13	0	0
14	0	0
15	0	0
16	0	0
17	1	1
18	1	1
19	0	0
20	0	0
21	1	1
22	0	0
23	0	1
24	1	1
25	1	1
26	0	0
27	1	0
28	0	0
29	0	0
30	1	0
31	0	3
32	0	0
33	1	1
34	1	0
35	2	1
36	1	1
37	0	0
38	3	3
39	0	0
40	1	1
41	1	1
42	0	0
43	1	1
44	1	1
45	1	1
46	1	0
47	1	1
48	0	0
49	0	3
50	2	1
51	1	1
52	1	1
53	0	0
54	1	1
55	0	1
56	0	0
57	1	0
58	1	1
59	0	0
60	1	0
61	0	0
62	3	3
63	0	0
64	2	0
65	0	0
66	0	1
67	1	1
68	0	1
69	2	0
70	0	0
71	2	0
72	1	1
73	1	1
74	0	1
75	2	1
76	0	0
77	2	0
78	0	0
79	1	1
80	0	0
81	0	0
82	0	0
83	0	0
84	0	0
85	1	1
86	1	1
87	0	0
88	0	0
89	1	0
90	1	1
91	0	0
92	1	1
93	0	3
94	0	0
95	1	1
96	1	1
97	3	0
98	0	0
99	1	1
100	0	0
101	1	0
102	0	3
103	0	1
104	0	0
105	0	0
106	1	0
107	1	1
108	0	0
109	1	1
110	0	0
111	1	1
112	0	0
113	0	0
114	0	1
115	0	0
116	3	3
117	0	0
118	1	1
119	0	0
120	1	1
121	1	1
122	1	0
123	1	1
124	1	0
125	0	0
126	1	1
127	0	0
128	1	1
129	0	0
130	1	1
131	1	0
132	0	0
133	0	3
134	0	3
135	1	0
136	0	0
137	0	0
138	1	1
139	0	0
140	0	0
141	0	0
142	0	1
143	0	0
144	0	0
145	0	0
146	0	0
147	0	0
148	1	1
149	1	1
150	0	0
151	0	0
152	0	0
153	3	0
154	0	0
155	1	1
156	1	1
157	0	0
158	0	0
159	1	0
160	1	0
161	0	0
162	3	3
163	1	1
164	1	1
165	0	1
166	1	1
167	0	1
168	0	0
169	0	0
170	0	0
171	0	0
172	0	0
173	0	0
174	0	0
175	0	1
176	0	0
177	1	0
178	1	1
179	0	0
180	1	0
181	0	0
182	1	1
183	0	0
184	1	1
185	0	0
186	0	3
187	0	0
188	1	1
189	1	1
190	1	0
191	3	3
192	0	0
193	3	0
194	0	0
195	0	0
196	0	0
197	0	0
198	1	1
199	0	1
200	1	1
201	1	0
202	1	1
203	0	1
204	0	0
205	1	1
206	0	0
207	1	1
208	1	0
209	0	0
210	0	1
211	0	0
212	3	0
213	0	1
214	0	0
215	0	0
216	1	1
217	0	0
218	1	0
219	0	0
220	0	0
221	0	3
222	1	1
223	0	0
224	0	3
225	1	1
226	1	1
227	1	0
228	3	3
229	1	1
230	3	0
231	0	0
232	3	1
233	0	0
234	3	1
235	0	1
236	0	3
237	0	0
238	0	0
239	0	0
240	0	0
241	0	0
242	0	1
243	0	0
244	0	0
245	0	0
246	0	0
247	1	1
248	1	1
249	1	0
250	1	1
251	0	0
252	0	0
253	0	0
254	2	0
255	1	1
256	0	1
257	1	1
258	0	0
259	0	1
260	3	3
261	1	0
262	1	0
263	0	0
264	1	0
265	0	0
266	1	1
267	0	0
268	0	0
269	0	0
270	1	1
271	2	0
272	3	0
273	1	1
274	3	3
275	0	0
276	1	1
277	1	1
278	1	1
279	3	3
280	0	0
281	0	0
282	1	1
283	0	1
284	0	3
285	0	0
286	0	0
287	0	0
288	1	1
289	1	1
290	0	0
291	1	0
292	3	0
293	0	0
294	3	0
295	1	0
296	1	1
297	0	0
298	0	0
299	0	3
300	1	1
301	3	3
302	0	0
303	0	0
304	0	0
305	3	3
306	1	1
307	3	3
308	0	0
309	0	0
310	1	0
311	1	1
312	0	0
313	3	0
314	1	1
315	0	0
316	0	0
317	1	1
318	1	1
319	0	0
320	0	0
321	0	3
322	1	1
323	3	3
324	1	1
325	3	0
326	0	0
327	1	1
328	0	0
329	0	0
330	1	1
331	0	0
332	0	3
333	0	0
334	0	0
335	1	1
336	1	1
337	1	1
338	2	0
339	0	0
340	0	0
341	1	0
342	1	3
343	1	1
344	0	0
345	1	3
346	2	0
347	0	0
348	3	0
349	1	1
350	1	0
351	3	0
352	1	1
353	0	0
354	0	0
355	1	1
356	1	1
357	0	1
358	1	1
359	1	1
360	1	1
361	0	0
362	0	0
363	3	3
364	3	3
365	0	0
366	0	0
367	1	1
368	0	0
369	0	0
370	0	0
371	1	0
372	0	0
373	0	0
374	0	0
375	1	1
376	3	3
377	1	1
378	1	1
379	0	0
380	0	0
381	1	1
382	0	1
383	0	0
384	0	0
385	1	1
386	0	0
387	1	1
388	0	0
389	1	1
390	0	0
391	1	0
392	1	1
393	0	0
394	0	0
395	1	0
396	0	0
397	3	3
398	0	0
399	0	0
400	3	1
401	0	1
402	0	3
403	1	0
404	1	0
405	0	0
406	1	1
407	0	0
408	0	0
409	0	0
410	1	1
411	0	0
412	3	0
413	1	1
414	0	0
415	0	0
416	0	0
417	1	1
418	1	1
419	0	0
420	1	0
421	0	1
422	1	1
423	2	0
424	3	3
425	0	3
426	0	0
427	1	0
428	1	1
429	1	1
430	0	0
431	3	0
432	0	0
433	0	0
434	1	1
435	0	0
436	0	0
437	1	1
438	1	1
439	0	0
440	0	0
441	1	1
442	0	0
443	3	3
444	0	0
445	0	0
446	0	0
447	0	0
448	1	1
449	1	1
450	0	0
451	1	1
452	0	0
453	0	0
454	1	1
455	0	0
456	0	0
457	1	0
458	1	1
459	1	1
460	0	0
461	0	1
462	0	0
463	0	0
464	3	0
465	0	3
466	0	0
467	1	1
468	1	1
469	0	0
470	1	0
471	0	0
472	1	1
473	0	0
474	0	0
475	0	1
476	1	0
477	1	0
478	0	0
479	0	0
480	0	0
481	0	0
482	1	1
483	1	0
484	1	1
485	1	1
486	1	1
487	0	0
488	0	1
489	0	0
490	0	0
491	0	0
492	0	3
493	0	0
494	0	0
495	1	1
496	1	1
497	0	0
498	1	1
499	0	0
500	0	0
501	1	1
