# Supplementary material
Source: ML conference proceedings conference paper supplement (https://aclanthology.org/2021.findings-acl.166)
Supplement: OptionalSupplementaryMaterial [file 2021.findings-acl.166.OptionalSupplementaryMaterial.zip › acl_supplement/data/Results/Text/LSTM/LSTM_dogwhistle_predictions.csv]

	Labels	Predictions	image_number
0	0	0	1059508332560613378
1	1	0	1108701637957300224
2	0	0	1107677359652642816
3	3	0	1107753891452645377
4	0	0	1058592078425276416
5	0	0	1106580970629681152
6	3	3	1115769250197565440
7	0	0	1116042450991075328
8	3	1	1063901397085839360
9	0	0	1116865207761022977
10	0	0	1061805835926429696
11	3	0	1113423770390343681
12	0	0	1114581548936892416
13	3	0	1108081074847051776
14	0	0	1109859110261018625
15	0	0	1109195496541900801
16	0	1	1116308727882223616
17	0	0	1113142093533380611
18	0	0	1108546561930219520
19	0	3	1113575940729085953
20	1	0	1035244105041891328
21	0	3	1107016011079974913
22	0	0	1109999380654948353
23	0	0	1109244411924434944
24	3	1	1024707445644570624
25	3	0	1114750222721323008
26	0	0	1057757913467535360
27	3	0	1109903594986319872
28	0	0	1116898106317201408
29	0	0	1110029894107332608
30	0	0	1107882212605784064
31	0	0	1024780876486455296
32	0	0	1113426589839241216
33	0	0	1057338230230671367
34	0	0	1109870593707515911
35	3	3	1063787173458137090
36	0	1	1057748846179241984
37	0	0	1114976253516423168
38	0	0	1113117629328261120
39	0	0	1105244284624822272
40	0	0	1108818558249824256
41	0	0	1114365706026536961
42	1	1	1062450549055021056
43	0	0	1109342411073994752
44	0	0	1108783548155219969
45	0	0	1115521882651004928
46	0	0	1113898361650909185
47	0	0	1113222329214095360
48	0	3	1107795780826480641
49	0	0	1105600891363737603
50	0	0	1113687267749564421
51	0	0	1108892807018758144
52	0	0	1114769006882361344
53	0	0	1109806440724774912
54	1	1	1042217078663593984
55	0	0	1109602117537464321
56	1	0	1106593104684027907
57	0	0	1108000770320850944
58	1	1	1061251397411315712
59	1	1	1053788544009945089
60	3	0	1109983270022844417
61	1	1	1041860965548130304
62	1	1	1056522297559998465
63	1	0	1115155116498149376
64	3	1	1113596794565464064
65	1	1	1105649960232591360
66	0	0	1110445370796965889
67	0	0	1061491259980693504
68	0	0	1061334295736995840
69	0	0	1057034881916641280
70	1	1	1056592261474082817
71	0	0	1105285356566519808
72	3	0	1105218375435862023
73	0	0	1114218815494086662
74	0	0	1113916195210764288
75	1	1	1057003409461649408
76	0	0	1108434445340758016
77	1	1	1060923251612966912
78	0	0	1109671346269753345
79	0	0	1058538218730258438
80	1	1	1057430860838760448
81	1	1	1042860455088156672
82	3	1	1056899209541038080
83	0	0	1109150901724504064
84	1	1	1114784150655909888
85	1	1	1115384511796264960
86	3	0	1109867150833934336
87	0	0	1058874123617677312
88	1	0	1061357037001543682
89	0	0	1053293279096139776
90	0	0	1108075827252600832
91	1	1	1058091473944625152
92	0	0	1056247093340196866
93	1	1	1109957939715018757
94	0	1	1045937256425553921
95	0	0	1109294906084937728
96	3	0	1108547857785806848
97	3	0	1107364431498043392
98	0	0	1110441914665320449
99	0	3	1114451353382690817
100	0	0	1113875060354367489
101	0	0	1109720334511558656
102	1	3	1056441383534379009
103	0	0	1108182159922266112
104	0	0	1115305784521392128
105	0	0	1110342878327439365
106	1	0	1113612772724682753
107	0	1	1061654643028226050
108	0	0	1056225446130532352
109	1	1	1047233479514017793
110	3	3	1109688447936143361
111	0	0	1108326487474745344
112	0	0	1056736675550892032
113	3	3	1024604529134907393
114	3	3	1109903055204638721
115	3	0	1115660329386676227
116	0	0	1114645537146449921
117	0	0	1115651523793518598
118	0	3	1116351583154049027
119	3	0	1050853581883154434
120	1	0	1114271764404756480
121	0	0	1117096158797676546
122	0	0	1115265995759923201
123	0	3	1115797154784776193
124	3	0	1106707571493220352
125	3	0	1044695563437068288
126	1	1	1047257632556417025
127	0	0	1058994219170312192
128	1	1	1061076346565287936
129	0	0	1024252637045239808
130	1	1	1057159059873378304
131	1	1	1044605884297437185
132	0	0	1105200347943981056
133	0	0	1115902657229619202
134	1	1	1042675227367333888
135	1	1	1063451859053174784
136	0	0	1107796689920946177
137	0	0	1042153762201071616
138	2	0	1108386064077651969
139	1	1	1057001469084426245
140	1	1	1036281738090041344
141	0	0	1106619475535777792
142	0	1	1115899208819777537
143	0	1	1056800782941671424
144	1	1	1023952990984654853
145	1	1	1113420387923255296
146	1	1	1056767565723246592
147	1	1	1064253056676696064
148	1	1	1034877991459979266
149	0	0	1114248174414323719
150	1	1	1061662530463064071
151	3	1	1063991714178846720
152	0	0	1115412072060342279
153	1	0	1059477211332235264
154	0	0	1107502771400372224
155	0	0	1105620416469585920
156	0	0	1110349746495983623
157	0	0	1106602466341195776
158	1	0	1110364292841439233
159	0	0	1056699375471210496
160	0	3	1117147560827871234
161	3	0	1110531659965833216
162	0	1	1062879659896041472
163	1	1	1109208203928240134
164	0	0	1113656019412901888
165	1	1	1062316236694908928
166	0	0	1052559416569020416
167	1	1	1116066732903419905
168	0	0	1051527702753230848
169	0	0	1108946044421705729
170	0	0	1115640415204593669
171	0	0	1044710394596675584
172	3	0	1110282906272976898
173	0	1	1114179521177985024
174	2	0	1036246511686963200
175	0	0	1116375065489231872
176	0	0	1053964819835961344
177	1	1	1051130538935939072
178	0	1	1057090641761574912
179	0	0	1115270425309777920
180	1	1	1117309132678287361
181	1	1	1110311771108184064
182	0	0	1105261766144114688
183	0	0	1106524592447856641
184	0	1	1114880304651673600
185	0	0	1105404680128118784
186	0	0	1105404678303608832
187	0	0	1113619729627979776
188	0	0	1054366937113743360
189	0	0	1110257688469032963
190	0	3	1035003596050452486
191	0	0	1105194904597209088
192	1	1	1113043187361374208
193	0	0	1113017568766373888
194	0	0	1114373415685840896
195	0	0	1062437884802809856
196	0	0	1116399997371781122
197	1	1	1107369806548922368
198	1	1	1054149802731155456
199	0	0	1058202133474902017
200	1	1	1034867790782423040
201	0	0	1109881221436198912
202	0	0	1058606958696108038
203	1	1	1053702508957388800
204	1	1	1034877538408062976
205	1	1	1115100350329917440
206	0	0	1106995269093285888
207	1	0	1061808305574764545
208	0	0	1105098234182029315
209	0	0	1105659766456487936
210	1	0	1024077365373227008
211	0	0	1046950502402002949
212	0	1	1050412750608842752
213	0	1	1058517586495893504
214	0	0	1061828676705230848
215	0	0	1105700744030760960
216	0	0	1106805736175292416
217	0	0	1047185468373135360
218	0	0	1106860073962426368
219	0	0	1043413806041456640
220	0	0	1110448774030204928
221	0	0	1113131674722807808
222	0	0	1049935344538460160
223	0	0	1042067385643958273
224	3	1	1050194923415396353
225	0	0	1051291155613110272
226	1	1	1044314075285639169
227	0	0	1049868627321729025
228	0	0	1106660984683405318
229	0	0	1109631046302072834
230	0	1	1109842098990313474
231	0	0	1044571737512390656
232	3	1	1036211780253569024
233	1	1	1062350493135982592
234	0	0	1109746347979108353
235	0	0	1062266554493136896
236	1	1	1054119704304992256
237	1	0	1064239544000831490
238	0	0	1105875349399834624
239	0	0	1108081927716827136
240	0	0	1058130377443893248
241	1	1	1045085286756208640
242	1	1	1061356918080454656
243	0	0	1055289967184920576
244	1	1	1052580299916230656
245	0	1	1057730888711241736
246	0	1	1045142651274752002
247	3	0	1050396636936118272
248	0	0	1057713424770183168
249	0	0	1105609159872077824
250	0	0	1107679154743451651
251	0	0	1108301258497187846
252	0	0	1107801961015975936
253	1	0	1108038886046007297
254	0	1	1042085189759975424
255	0	0	1105870932051152897
256	1	1	1054508250912108544
257	0	0	1114218538485469184
258	3	0	1110370376759103489
259	0	1	1114074102875213824
260	1	1	1041824536319090688
261	1	0	1116648332066213894
262	0	0	1057057735756390400
263	1	1	1053841368441737216
264	0	0	1057798042408095744
265	0	3	1106828274733334528
266	1	0	1054485828951404544
267	0	0	1107749196659130369
268	1	1	1063440109985517568
269	0	0	1116281663921762304
270	0	0	1116380692064210945
271	0	0	1116035614401601536
272	1	1	1034967888476524544
273	2	0	1113407989824786433
274	0	1	1035866576061382656
275	1	1	1107282344203952128
276	1	1	1114714897319960576
277	0	0	1105574730923429888
278	1	1	1114205083850477574
279	1	1	1051581391895433219
280	1	1	1061742210956357632
281	1	0	1115796184659103745
282	0	0	1113840493077630976
283	0	0	1115322519169507329
284	0	0	1105580369020112896
285	0	0	1047176060092211200
286	0	0	1106748819683848192
287	0	0	1109182977207087108
288	0	0	1061520989224239109
289	0	0	1114975202579030016
290	0	0	1054174769514512384
291	0	0	1064007494547042305
292	2	0	1106865399688118272
293	1	1	1057088252216311808
294	0	0	1063902244712656897
295	0	0	1110368097645547520
296	1	1	1024805262895579136
297	1	1	1109890120516284417
298	0	0	1113147404642082817
299	1	1	1051332251106066433
300	1	1	1035262675993935872
301	0	0	1056686524006305793
302	0	0	1108931029769682949
303	0	0	1044448193453412353
304	0	0	1113699622344482816
305	3	3	1058113465754247168
306	1	0	1105293057866506240
307	0	0	1062913521078419456
308	0	0	1061220807525961728
309	0	0	1107894624666845184
310	0	0	1115746244033503233
311	3	3	1106835705198710784
312	1	1	1042266507345096705
313	0	1	1034939924322115584
314	0	0	1037037227258200064
315	0	0	1106825962514247680
316	2	0	1105269450859786241
317	0	1	1053703953605525506
318	0	0	1054138944386990081
319	1	0	1057742077012905986
320	1	1	1035914114634272768
321	1	1	1057098802287521792
322	1	0	1054560047202742272
323	0	0	1114758165382307841
324	0	0	1113188612454137858
325	1	0	1106768577825304576
326	1	1	1064189790021668872
327	0	0	1051486821685882885
328	1	1	1105564380073287680
329	1	1	1106960080694583296
330	0	1	1053866832556425216
331	1	1	1034977939497144321
332	1	1	1106675169718951938
333	0	0	1109963122821992450
334	1	1	1050152470574456832
335	1	1	1114248320539435008
336	1	1	1058123956589346818
337	1	1	1062470093718937600
338	1	1	1115425010900848645
339	1	1	1044325195232595969
340	1	1	1050792216673886208
341	1	1	1046275065476775936
342	1	1	1063853291552063488
343	1	0	1037037807238184960
344	0	0	1109673276270411776
345	1	1	1061388778743496705
346	0	1	1058318853816664069
347	1	1	1044626313494110208
348	1	1	1062819221007032320
349	1	1	1114484230065664001
350	0	0	1108907836942225408
351	2	1	1064325232557768704
352	1	1	1116052760569548802
353	1	1	1034860877814673408
354	0	0	1107387893541232642
355	0	0	1044321688215859200
356	0	1	1050532510474625024
357	1	0	1050710621283643392
358	0	1	1049519770935148544
359	0	1	1050545519964119041
360	0	1	1108398078468517890
361	1	1	1063577167018156032
362	1	1	1024495306094854146
363	0	0	1108400026328489987
364	0	1	1063599198984130560
365	3	0	1114610686422863879
366	0	0	1113517914672566272
367	0	0	1105115461627404289
368	1	1	1051275520699244545
369	0	0	1115276435432853504
370	1	1	1055244911828713473
371	1	1	1113888659818917888
372	0	1	1053708870600810497
373	1	1	1106957685898051584
374	1	1	1042151256599482368
375	0	0	1106657103173902337
376	0	0	1110023763150532608
377	3	0	1061653033396985856
378	1	1	1117517583681507328
379	1	1	1050391873330786304
380	0	0	1108764484716429312
381	1	1	1053452042826670080
382	1	0	1054145779172954112
383	3	0	1116483741952741379
384	1	1	1057986269542780928
385	1	1	1057987103173365765
386	2	1	1061527969653501953
387	0	0	1055899608000446465
388	0	1	1116002172582420483
389	1	0	1043504077857071104
390	1	1	1047135867960143875
391	1	1	1058004651168149504
392	1	1	1046904447098544128
393	1	1	1107819018835103745
394	0	0	1108543156658864128
395	1	1	1114280112894169093
396	0	0	1106692998312665091
397	1	1	1057431128188039170
398	1	0	1062801072404672512
399	0	0	1114492136324341760
400	1	1	1054707009780625408
401	1	1	1024257705244946433
402	0	0	1115142495292334080
403	1	1	1058511486966874112
404	0	0	1042240922895953920
405	1	0	1064367919084097536
406	1	0	1114290912023257089
407	0	0	1064171396597784581
408	3	3	1061161453904834560
409	1	0	1116044056352702466
410	0	1	1063897500296364037
411	1	1	1057842053273567232
412	1	0	1061400938362101762
413	0	0	1107968886081634305
414	0	3	1116513011932512258
415	0	0	1056706402163572738
416	2	1	1042440758220005376
417	1	1	1050995405159165952
418	1	0	1053894921961304064
419	1	0	1046268564863238144
420	1	1	1107347655347314688
421	0	0	1034736819789750272
422	1	1	1034928116257382401
423	0	0	1115049297727213568
424	1	1	1061910083515248641
425	1	1	1042352771167477765
426	0	0	1107733549766098946
427	1	1	1109416005762056192
428	0	0	1109102107548893184
429	0	0	1107628318151581699
430	1	0	1108785071115460610
431	1	1	1050852403044605954
432	1	0	1115437072679153667
433	0	0	1061008117465530370
434	1	0	1056701407007592448
435	0	0	1051730252232318976
436	1	1	1062734507080667136
437	0	0	1110377938493599747
438	0	1	1062494928327073792
439	0	1	1056358330250215425
440	0	1	1054605519837523969
441	1	1	1113225736331067399
442	1	1	1053993860123242498
443	1	1	1106546229524213767
444	1	1	1059530820606742528
445	0	0	1105497451115544578
446	1	1	1113439959371911168
447	1	0	1108564076571975681
448	1	1	1058464913495150595
449	0	0	1053349233988911104
450	1	1	1057577929721462785
451	0	0	1057075711708725253
452	0	0	1108865016059576320
453	1	0	1107354238584274944
454	1	1	1114589089020301312
455	2	1	1107508416698896385
456	0	1	1047023825454600192
457	1	1	1054051986234953728
458	0	1	1043040487966474240
459	1	0	1044177880526270465
460	2	1	1061883468240560128
461	0	1	1064265701937041409
462	1	1	1107213413468565504
463	0	0	1114484452292538368
464	1	1	1115162314976649216
465	1	1	1044036911696957440
466	1	1	1051752728907661312
467	1	1	1056975193715826688
468	0	1	1063602331680301057
469	0	0	1115308624467955719
470	1	1	1062808340894490624
471	0	0	1109124614331027457
472	0	0	1106742580568621057
473	0	0	1114244802789273600
474	1	1	1035149310038618112
475	1	1	1058837374489292800
476	0	0	1108097788909375490
477	0	1	1042283831284379649
478	1	1	1114041243615604736
479	1	1	1037392512737001473
480	3	0	1107761337671643136
481	1	0	1046414021891706882
482	0	0	1108023859373113344
483	1	1	1108804729604313088
484	0	0	1050825970066890752
485	1	1	1113738500694859777
486	1	1	1109446237852450816
487	0	0	1105124051616448514
488	0	0	1113661078926495744
489	1	1	1113900292247044096
490	2	1	1110221273416646658
491	1	0	1114333375823740928
492	0	0	1035508530860548096
493	0	1	1055273737132654598
494	1	1	1063451208071999494
495	0	0	1042072743133544448
496	1	0	1050128502840651776
497	1	1	1058103018330165248
498	2	1	1042755940863418368
499	1	1	1105476517482688514
500	0	0	1110516280673660928
501	0	1	1035324085398593537
