# Supplementary material
Source: ML conference proceedings conference paper supplement (https://aclanthology.org/2021.findings-acl.166)
Supplement: OptionalSupplementaryMaterial [file 2021.findings-acl.166.OptionalSupplementaryMaterial.zip › acl_supplement/data/Results/Text/RoBERTa/merges.txt]

#version: 0.2
Ġ t
Ġ a
h e
i n
r e
o n
Ġt he
e r
Ġ s
a t
Ġ w
Ġ o
e n
Ġ c
i t
i s
a n
o r
e s
Ġ b
e d
Ġ f
in g
Ġ p
o u
Ġa n
a l
a r
Ġt o
Ġ m
Ġo f
Ġ in
Ġ d
Ġ h
Ġan d
i c
a s
l e
Ġt h
i on
o m
l l
en t
Ġ n
Ġ l
s t
Ġ re
v e
Ġ e
r o
l y
Ġb e
Ġ g
Ġ T
c t
Ġ S
i d
o t
Ġ I
u t
e t
Ġ A
Ġ is
Ġ on
i m
a m
o w
a y
a d
s e
Ġth at
Ġ C
i g
Ġf or
a c
Ġ y
v er
u r
Ġ u
l d
Ġs t
Ġ M
' s
Ġ he
Ġ it
at ion
it h
i r
c e
Ġy ou
i l
Ġ B
Ġw h
o l
Ġ P
Ġw ith
Ġ 1
t er
c h
Ġa s
Ġw e
Ġ (
n d
i ll
Ġ D
i f
Ġ 2
a g
er s
k e
Ġ "
Ġ H
e m
Ġc on
Ġ W
Ġ R
he r
Ġw as
Ġ r
o d
Ġ F
u l
at e
Ġa t
r i
p p
o re
ĠT he
Ġs e
u s
Ġp ro
Ġh a
u m
Ġa re
Ġd e
a in
an d
Ġo r
ig h
es t
is t
a b
r om
Ġ N
t h
Ġc om
Ġ G
u n
o p
0 0
Ġ L
Ġn ot
es s
Ġe x
Ġ v
re s
Ġ E
e w
it y
an t
Ġb y
e l
o s
or t
o c
q u
Ġf rom
Ġha ve
Ġs u
i ve
ou ld
Ġs h
Ġth is
n t
r a
p e
igh t
ar t
m ent
Ġa l
u st
en d
- -
al l
Ġ O
ac k
Ġc h
Ġ le
i es
re d
ar d
â Ģ
ou t
Ġ J
Ġa b
e ar
i v
al ly
ou r
o st
g h
p t
Ġp l
as t
Ġc an
a k
om e
u d
T he
Ġh is
Ġd o
Ġg o
Ġh as
g e
' t
Ġ U
r ou
Ġs a
Ġ j
Ġb ut
Ġw or
Ġa ll
e ct
Ġ k
am e
Ġw ill
o k
Ġw he
Ġthe y
id e
0 1
f f
ic h
p l
t her
Ġt r
. .
Ġin t
i e
u re
ag e
Ġn e
i al
a p
in e
ic e
Ġm e
Ġo ut
an s
on e
on g
ion s
Ġwh o
Ġ K
Ġu p
Ġthe ir
Ġa d
Ġ 3
Ġu s
at ed
ou s
Ġm ore
u e
o g
ĠS t
in d
i ke
Ġs o
im e
p er
. "
b er
i z
a ct
Ġon e
Ġsa id
Ġ -
a re
Ġyou r
c c
ĠT h
Ġc l
e p
a ke
ab le
i p
Ġcon t
Ġwh ich
i a
Ġ im
Ġab out
Ġwe re
ver y
u b
Ġh ad
Ġ en
Ġcom p
, "
ĠI n
Ġu n
Ġa g
i re
ac e
a u
ar y
Ġw ould
as s
r y
Ġ âĢ
c l
o ok
e re
s o
Ġ V
ig n
i b
Ġof f
Ġt e
v en
Ġ Y
i le
o se
it e
or m
Ġ2 01
Ġre s
Ġm an
Ġp er
Ġo ther
or d
ul t
Ġbe en
Ġl ike
as e
an ce
k s
ay s
ow n
en ce
Ġd is
ct ion
Ġan y
Ġa pp
Ġs p
in t
res s
ation s
a il
Ġ 4
ic al
Ġthe m
Ġhe r
ou nt
ĠC h
Ġa r
Ġ if
Ġthe re
Ġp e
Ġy ear
a v
Ġm y
Ġs ome
Ġwhe n
ou gh
ac h
Ġth an
r u
on d
ic k
Ġo ver
ve l
Ġ qu
Ċ Ċ
Ġs c
re at
re e
ĠI t
ou nd
p ort
Ġal so
Ġp art
f ter
Ġk n
Ġbe c
Ġt ime
en s
Ġ 5
op le
Ġwh at
Ġn o
d u
m er
an g
Ġn ew
-- --
Ġg et
or y
it ion
ing s
Ġj ust
Ġint o
Ġ 0
ent s
o ve
t e
Ġpe ople
Ġp re
Ġit s
Ġre c
Ġt w
i an
ir st
ar k
or s
Ġwor k
ad e
o b
Ġs he
Ġo ur
w n
in k
l ic
Ġ1 9
ĠH e
is h
nd er
au se
Ġh im
on s
Ġ [
Ġ ro
f orm
i ld
at es
ver s
Ġon ly
o ll
Ġs pe
c k
e ll
am p
Ġa cc
Ġb l
i ous
ur n
f t
o od
Ġh ow
he d
Ġ '
Ġa fter
a w
Ġat t
o v
n e
Ġpl ay
er v
ic t
Ġc ould
it t
Ġa m
Ġf irst
Ġ 6
Ġa ct
Ġ $
e c
h ing
u al
u ll
Ġcom m
o y
o ld
c es
at er
Ġf e
Ġbe t
w e
if f
Ġtw o
oc k
Ġb ack
) .
id ent
Ġu nder
rou gh
se l
x t
Ġm ay
rou nd
Ġp o
p h
is s
Ġd es
Ġm ost
Ġd id
Ġad d
j ect
Ġin c
f ore
Ġp ol
on t
Ġag ain
cl ud
ter n
Ġkn ow
Ġne ed
Ġcon s
Ġc o
Ġ .
Ġw ant
Ġse e
Ġ 7
n ing
i ew
ĠTh is
c ed
Ġe ven
Ġin d
t y
ĠW e
at h
Ġthe se
Ġp r
Ġu se
Ġbec ause
Ġf l
n g
Ġn ow
ĠâĢ ĵ
c om
is e
Ġm ake
Ġthe n
ow er
Ġe very
ĠU n
Ġse c
os s
u ch
Ġe m
Ġ =
ĠR e
i ed
r it
Ġin v
le ct
Ġsu pp
at ing
Ġl ook
m an
pe ct
Ġ 8
ro w
Ġb u
Ġwhe re
if ic
Ġyear s
i ly
Ġd iff
Ġsh ould
Ġre m
T h
I n
Ġe v
d ay
' re
ri b
Ġre l
s s
Ġde f
Ġr ight
Ġs y
) ,
l es
00 0
he n
Ġth rough
ĠT r
_ _
Ġw ay
Ġd on
Ġ ,
Ġ1 0
as ed
Ġas s
ub lic
Ġre g
ĠA nd
i x
Ġ very
Ġin clud
ot her
Ġim p
ot h
Ġsu b
ĠâĢ Ķ
Ġbe ing
ar g
ĠW h
= =
ib le
Ġdo es
an ge
r am
Ġ 9
er t
p s
it ed
ation al
Ġb r
Ġd own
Ġman y
ak ing
Ġc all
ur ing
it ies
Ġp h
ic s
al s
Ġde c
at ive
en er
Ġbe fore
il ity
Ġwe ll
Ġm uch
ers on
Ġth ose
Ġsu ch
Ġ ke
Ġ end
ĠB ut
as on
t ing
Ġl ong
e f
Ġth ink
y s
Ġbe l
Ġs m
it s
a x
Ġo wn
Ġpro v
Ġs et
if e
ment s
b le
w ard
Ġsh ow
Ġp res
m s
om et
Ġo b
Ġs ay
ĠS h
t s
f ul
Ġe ff
Ġg u
Ġin st
u nd
re n
c ess
Ġ ent
ĠY ou
Ġgo od
Ġst art
in ce
Ġm ade
t t
st em
ol og
u p
Ġ |
um p
Ġhe l
ver n
ul ar
u ally
Ġa c
Ġm on
Ġl ast
Ġ2 00
1 0
Ġst ud
u res
ĠA r
sel f
ar s
mer ic
u es
c y
Ġm in
oll ow
Ġc ol
i o
Ġm od
Ġc ount
ĠC om
he s
Ġf in
a ir
i er
âĢ Ķ
re ad
an k
at ch
e ver
Ġst r
Ġpo int
or k
ĠN ew
Ġs ur
o ol
al k
em ent
Ġus ed
ra ct
we en
Ġs ame
ou n
ĠA l
c i
Ġdiff ere
Ġwh ile
---- ----
Ġg ame
ce pt
Ġs im
.. .
Ġin ter
e k
Ġre port
Ġpro du
Ġst ill
l ed
a h
Ġhe re
Ġwor ld
Ġth ough
Ġn um
ar ch
im es
al e
ĠS e
ĠI f
/ /
ĠL e
Ġre t
Ġre f
Ġtr ans
n er
ut ion
ter s
Ġt ake
ĠC l
Ġcon f
w ay
a ve
Ġgo ing
Ġs l
u g
ĠA meric
Ġspe c
Ġh and
Ġbet ween
ist s
ĠD e
o ot
I t
Ġe ar
Ġagain st
Ġh igh
g an
a z
at her
Ġex p
Ġo p
Ġin s
Ġg r
Ġhel p
Ġre qu
et s
in s
ĠP ro
is m
Ġf ound
l and
at a
us s
am es
Ġp erson
Ġg reat
p r
Ġs ign
ĠA n
' ve
Ġs omet
Ġs er
h ip
Ġr un
Ġ :
Ġt er
ire ct
Ġf ollow
Ġd et
ic es
Ġf ind
1 2
Ġm em
Ġc r
e red
e x
Ġex t
ut h
en se
c o
Ġte am
v ing
ou se
as h
at t
v ed
Ġsy stem
ĠA s
d er
iv es
m in
Ġle ad
ĠB l
c ent
Ġa round
Ġgo vern
Ġc ur
vel op
an y
Ġc our
al th
ag es
iz e
Ġc ar
od e
Ġl aw
Ġre ad
' m
c on
Ġre al
Ġsupp ort
Ġ1 2
.. ..
Ġre ally
n ess
Ġf act
Ġd ay
Ġb oth
y ing
Ġs erv
ĠF or
Ġth ree
Ġw om
Ġm ed
od y
ĠThe y
5 0
Ġex per
t on
Ġe ach
ak es
Ġc he
Ġc re
in es
Ġre p
1 9
g g
ill ion
Ġg rou
ut e
i k
W e
g et
E R
Ġm et
Ġs ays
o x
Ġd uring
er n
iz ed
a red
Ġf am
ic ally
Ġha pp
ĠI s
Ġch ar
m ed
v ent
Ġg ener
i ent
p le
i et
re nt
1 1
v es
pt ion
Ġ2 0
form ation
Ġc or
Ġoff ic
ie ld
Ġto o
is ion
Ġin f
Ġ Z
t he
o ad
Ġp ublic
Ġpro g
r ic
* *
Ġw ar
Ġp ower
v iew
Ġf ew
Ġl oc
Ġdiffere nt
Ġst ate
Ġhe ad
' ll
Ġp oss
Ġst at
re t
ant s
Ġv al
Ġis s
Ġc le
i vers
an c
Ġex pl
Ġan other
Ġ Q
Ġa v
th ing
n ce
W h
Ġch ild
Ġs ince
i red
l ess
Ġl ife
Ġde velop
itt le
Ġde p
Ġp ass
ã ĥ
Ġt urn
or n
Th is
b ers
ro ss
ĠA d
Ġf r
Ġres p
Ġsec ond
o h
Ġ /
Ġdis c
Ġ &
Ġsomet hing
Ġcomp le
Ġ ed
Ġf il
Ġmon th
a j
u c
Ġgovern ment
Ġwith out
Ġle g
Ġd ist
Ġp ut
Ġqu est
an n
Ġpro t
2 0
Ġne ver
i ence
Ġle vel
Ġar t
Ġth ings
Ġm ight
Ġeff ect
Ġcont ro
Ġc ent
Ġ1 8
Ġall ow
Ġbel ie
ch ool
ot t
Ġinc re
Ġfe el
Ġres ult
Ġl ot
Ġf un
ot e
Ġt y
ere st
Ġcont in
Ġus ing
Ġb ig
2 01
Ġas k
Ġb est
Ġ )
I N
Ġo pp
3 0
Ġnum ber
in ess
S t
le ase
Ġc a
Ġm ust
Ġd irect
Ġg l
Ġ <
Ġop en
Ġp ost
Ġcom e
Ġse em
ord ing
Ġwe ek
ate ly
it al
Ġe l
ri end
Ġf ar
Ġt ra
in al
Ġp ri
ĠU S
Ġpl ace
Ġfor m
Ġto ld
" :
ain s
at ure
ĠTr ump
Ġst and
Ġ #
id er
ĠF r
Ġne xt
Ġs oc
Ġp ur
Ġle t
Ġl ittle
Ġh um
Ġ i
r on
1 5
Ġ1 5
Ġcomm un
Ġm ark
ĠThe re
Ġw r
ĠTh at
Ġin formation
w ays
Ġb us
a pp
Ġinv est
m e
Ġh ard
ain ed
e ad
Ġim port
Ġapp ro
Ġt est
Ġt ri
Ġre st
os ed
Ġf ull
Ġc are
ĠS p
Ġc ase
O N
Ġs k
Ġl ess
Ġ +
Ġpart ic
ĠP l
ab ly
u ck
is hed
ch n
b e
Ġl ist
at or
Ġto p
Ġad v
ĠB e
ru ct
Ġd em
r ation
l ing
g y
re en
g er
Ġh ome
Ġle ft
Ġbet ter
Ġd ata
Ġ1 1
Ġatt ack
Ġpro ble
l ine
ard s
Ġbe h
r al
ĠH ow
ĠS he
ar ge
Ġ --
: //
Ġb ro
ĠP h
at s
Ġbu ild
w w
id ed
a im
as es
en cy
Ġm ain
in ed
Ġinclud ing
Ġ {
Ġg ot
Ġint erest
Ġke ep
Ġ X
Ġe as
ain ing
Ġcl ass
âĢ ¦
ĠN o
Ġv ar
Ġsm all
amp le
A T
Ġ ide
ĠS o
Ġre ce
Ġpol it
Ġm ov
Ġpl an
Ġper cent
iv ing
Ġc amp
Ġp ay
1 4
s c
is ed
Ġu nt
one y
pl oy
== ==
Ġdid n
ĠI nd
el s
ert ain
Ġp os
__ __
i ver
Ġpro cess
Ġprog ram
if ied
ĠR ep
1 6
u ro
olog y
at ter
in a
Ġn ame
ĠA ll
Ġf our
Ġret urn
v ious
b s
Ġcall ed
Ġm ove
ĠS c
ir d
Ġgrou p
Ġb re
Ġm en
Ġc ap
t en
e e
Ġd ri
le g
he re
uth or
Ġp at
Ġcur rent
id es
Ġp op
t o
ent ion
Ġal ways
Ġm il
Ġwom en
Ġ1 6
Ġo ld
iv en
ra ph
ĠO r
r or
ent ly
Ġn ear
ĠE x
re am
s h
Ġ1 4
Ġf ree
iss ion
st and
ĠC on
al ity
us ed
1 3
Ġdes ign
Ġch ange
Ġch ang
Ġb o
Ġv is
em ber
Ġb ook
read y
Ġk ill
2 5
pp ed
Ġa way
Ġab le
Ġcount ry
Ġcon st
ar n
Ġor der
A R
i or
i um
or th
1 8
ail able
Ġs w
Ġm illion
Ġ1 3
at ic
t ed
ĠG o
Ġo per
en g
Ġth ing
aj or
con om
ĠCom m
Ġwh y
u red
ur al
Ġs chool
b y
ĠM ar
Ġa ff
Ġd ays
Ġan n
us h
an e
I f
e g
Ġpro f
Ġhe alth
ou th
B ut
ion al
. ,
Ġs ol
Ġal ready
Ġ3 0
Ġchar act
H e
Ġf riend
E S
i ans
ic le
' d
ĠO n
Ġle ast
Ġp rom
Ġd r
Ġh ist
it her
Ġ est
i qu
1 7
s on
Ġte ll
Ġt alk
oh n
o int
le ction
A N
Ġunt il
au gh
Ġl ater
Ġ ve
Ġv iew
end ing
iv ed
Ġwor d
w are
Ġc ost
Ġen ough
Ġg ive
ĠUn ited
Ġte chn
are nt
O R
Ġp ar
ĠD r
Ġ201 6
r ist
er ing
Ġ Â
Ġl arge
s ide
ac y
cc ess
Ġw in
Ġimport ant
Ġ19 9
Ġdoes n
Ġ1 7
Ġbus iness
Ġcle ar
Ġre se
" ,
ur y
Ġe qu
as ter
al f
ĠAmeric an
n ect
Ġex pect
ivers ity
Ġo cc
ĠF l
Ġk ind
Ġme an
Ġp ast
Ġde v
Ġb as
le t
ra ft
Ġor gan
Ġde l
Ġper form
Ġst ory
Ġse ason
ĠC ol
Ġcl aim
Ġc ame
Ġwith in
Ġl ine
Ġpro ject
ĠA t
Ġcontro l
end ed
ĠS y
Ġa ir
iz ation
Ġ *
le y
Ġm oney
id d
Y ou
f or
Ġfam ily
Ġm aking
Ġb it
Ġpol ice
Ġhapp en
Ġ vers
on y
u ff
ĠW hen
Ġs it
ide o
l f
is on
Ġsu re
g in
Ġapp ear
Ġl ight
Ġ es
o f
Ġw ater
Ġt imes
n ot
Ġg row
Ġcomp any
ĠT e
ow s
Ġm ar
our ce
i ol
ar m
b r
Ġex ample
Ġcon c
Ġf ore
ĠT o
p ro
E N
ri es
Ġ2 5
ĠC an
ne y
Ġact ually
Ġe ver
ur ity
ak en
ap s
Ġt ax
Ġm ajor
am a
Ġof ten
er al
Ġhum an
Ġj ob
is ter
Ġav ailable
oc r
en n
a id
iv id
Ġrec ord
? "
Ġs ing
ĠA m
id ence
Ġnew s
st er
Ġe conom
Ġfollow ing
ĠB r
is ing
Ġh our
m ost
um ent
Ġse x
Ġdes c
Ġbec ome
ĠE d
Ġto ok
Ġha ving
Ġprodu ct
a ult
A s
ar ing
Ġme ans
Ġh op
un e
Ġch o
Ġc ertain
Ġn on
Ġde al
2 4
le ment
oc i
en e
Ġs ide
ĠP r
ĠM ay
Ġre ason
u ed
c hed
ul ation
Ġe lect
Ġoffic ial
Ġposs ible
Ġh old
and s
ot s
Ġc ity
or ies
Ġse ver
Ġchild ren
Ġon ce
Ġact iv
l er
Ġn ight
it ions
ĠJ ohn
a pe
pl ay
Ġd one
Ġl im
Ġwork ing
ĠP res
or ld
e b
ĠC o
Ġb ody
ail s
ut es
ĠM r
Ġwhe ther
Ġa uthor
ro p
Ġpro per
Ġse en
) ;
Ġf ac
ĠS u
Ġcon d
it ing
Ġcour se
Ġ }
-------- --------
a ign
Ġev ent
Ġen g
Ġp ot
Ġin tern
i am
Ġsh ort
em pt
ã Ĥ
ĠG od
il ar
8 0
Ġor ig
I S
our n
ab ility
it ive
Ġd am
Ġ1 00
Ġp ress
Ġdo ing
Ġprot ect
r ing
Ġthough t
Ġquest ion
re w
ĠW ar
Ġsever al
ĠSt ate
Ġg iven
Ġf und
ĠT w
Ġw ent
an ces
w ork
p or
m y
4 0
Ġar g
art ment
ust om
Ġpol ic
Ġme et
Ġc reat
2 2
ĠSt ates
Ġg ames
ra w
ut ure
Ġunder stand
ur s
ĠO b
l ish
s y
Ġm akes
Ġw on
ag on
Ġh tt
Ġl ove
ent ial
Ġcomple te
p ar
ĠI m
A L
Ġacc ount
Â ł
ore d
ver t
Ġ ident
Ġ201 5
Ġother s
ĠM in
i ber
ver age
The re
ition al
d d
Ġpro b
Ġyou ng
Ġal ong
Ġacc ording
Ġy et
Ġmem bers
ĠWh at
o id
ĠM an
A nd
Ġam ong
a i
Ġem ploy
ĠR es
Ġ >
Ġinv ol
Ġl ow
a f
ĠC ar
Ġh ig
ĠO ne
ĠS ec
in ation
Ġlike ly
Ġan t
ag ed
ĠR uss
Ġb en
Ġre le
F or
b ack
ĠN ot
Ġpres ident
b all
Ġacc ess
ivid ual
ĠD em
ĠE uro
6 0
Ġkn own
ir l
ĠG r
Ġear ly
u se
iet y
âĢ ĵ
Ġf ight
Ġs ent
Ġto day
Ġmark et
" .
Ġb ased
Ġstr ong
ur ther
Ġde b
m ber
Ġproble m
Ġde ath
Ġsoc ial
im ate
A S
ort un
Ġcamp aign
er y
C h
Ġe y
i ally
Ġm us
w h
p os
Ġ er
Ġsa f
Ġmonth s
ir on
Ġv iol
Ġf ive
Ġst re
Ġplay ers
in c
al d
y ear
a un
Ġsu ccess
Ġpres ent
ere nce
Ġ201 4
Ġsu gg
Ġpartic ular
Ġtr y
Ġsugg est
ĠCh rist
on es
Ġpri v
2 3
Ġc rit
Ġl and
Ġloc al
if y
2 9
Ġa ut
E D
ĠG u
Ġm ult
Ġpolit ical
Ġask ed
Ġfor mer
it ter
ri pt
Ġcl ose
Ġp ract
ĠY ork
Ġget ting
Ġac ross
Ġcom b
Ġbelie ve
Ġ z
Ġto get
Ġtoget her
ĠC ent
ir c
Ġind ividual
ĠM c
2 7
is k
ĠE ng
Ġf ace
Ġ2 4
Ġval ue
Ġare a
e v
Ġw rit
ĠPres ident
Ġv ot
Ġke y
Ġm om
p ut
Ġany thing
Ġexper ience
att le
Ġm ind
a ff
om m
Ġf uture
g ed
Ġc ut
Ġto t
it ch
Ġv ideo
Ġinvest ig
Ġn et
ĠM y
r ict
i en
. )
Ġimp ro
th ough
ward s
Ġcon nect
ĠM ed
sel ves
ens ive
m b
o ber
at ors
A n
Ġ5 0
Ġre du
res ent
Ġab ove
Ġf re
ĠEuro pe
s w
Ġam ount
ĠA pp
Ġe ither
Ġmil it
Ġan al
Ġf ail
ĠE n
al es
Ġspec ial
Ġbl ack
I T
c her
Ġlook ing
Ġf ire
y n
Ġal most
o on
Ġstud y
Ġm iss
c hes
ro wn
Ġt re
Ġcommun ity
Ġmed ia
Ġf ood
Ġcom es
ĠUn iversity
Ġsing le
Wh at
u ly
Ġh alf
ag ue
h od
ĠRep ublic
Ġstart ed
Ġqu ick
ot o
b ook
Ġiss ue
it or
Ġel se
Ġcons ider
2 6
ro du
Ġt aken
2 8
9 9
ĠW ith
Ġtr ue
Ġw a
Ġtr ad
Ġag o
Ġm ess
ie f
Ġadd ed
o ke
Ġb ad
Ġf av
3 3
Ġsim ilar
as k
ĠD on
Ġcharact er
ort s
ĠH ouse
Ġreport ed
Ġty pe
v al
i od
ĠHow ever
Ġt arg
Ġent ire
pp ing
Ġhist ory
Ġl ive
ff ic
.... ....
ed eral
Ġtr ying
Ġdisc uss
ĠH ar
ac es
l ished
Ġse lf
os p
re st
Ġro om
el t
Ġf all
ol ution
Ġe t
Ġ x
Ġis n
Ġide a
b o
Ġs ound
ĠD ep
Ġsome one
ci ally
ull y
Ġf oc
Ġob ject
if t
ap er
Ġplay er
Ġr ather
Ġserv ice
as hing
ĠD o
ĠP art
ru g
m on
p ly
Ġm or
Ġnot hing
Ġprov ide
I C
un g
Ġpart y
Ġex ist
Ġm ag
7 0
Ġr ul
Ġh ouse
Ġbeh ind
Ġhow ever
ĠW orld
Ġs um
Ġapp lic
Ġ ;
Ġfun ction
g r
ĠP ol
Ġfr ont
2 00
Ġser ies
Ġt em
Ġty p
ill s
Ġo pt
Ġpoint s
Ġbel ow
itt ed
Ġspec ific
Ġ201 7
um b
Ġr a
Ġpre vious
Ġpre t
re me
Ġc ustom
Ġcour t
ĠM e
Ġre pl
Ġwho le
g o
c er
Ġt reat
ĠA ct
Ġprob ably
Ġle arn
end er
ĠA ss
Ġvers ion
n ow
Ġche ck
ĠC al
R E
min ist
O n
our ces
Ġben ef
Ġd oc
Ġdet er
Ġen c
Ġsu per
Ġadd ress
Ġv ict
Ġ201 3
Ġme as
t r
Ġf ield
W hen
Ġsign ific
u ge
Ġfe at
Ġcomm on
l oad
Ġbe gin
Ġbr ing
Ġa ction
er man
Ġdesc rib
Ġind ust
Ġwant ed
ri ed
m ing
Ġatt empt
4 5
f er
Ġd ue
ress ion
# #
Ġsh all
Ġs ix
o o
Ġst ep
Ġp ub
Ġhim self
Ġ2 3
Ġc op
Ġd est
Ġst op
A C
ib ility
Ġl ab
ic ult
Ġhour s
Ġcre ate
Ġf urther
ĠAmeric a
ĠC ity
Ġd ou
he ad
S T
ĠN orth
c ing
Ġn ational
u le
ĠIn st
Ġt aking
ĠQ u
ir t
Ġre d
Ġrese arch
v iron
ĠG e
Ġbre ak
an a
Ġsp ace
ater ial
Ġrec ent
ĠA b
Ġgener al
Ġh it
Ġper iod
Ġevery thing
ive ly
Ġph ys
Ġsay ing
an ks
Ġc ou
Ġc ult
ac ed
e al
u ation
Ġc oun
l u
Ġinclud e
Ġpos ition
ĠA fter
ĠCan ad
ĠE m
Ġim m
ĠR ed
Ġp ick
Ġcom pl
Ġm atter
re g
e xt
ang u
is c
o le
a ut
Ġcomp et
e ed
f ect
Ġ2 1
ĠS en
ĠThe se
as ing
Ġcan not
Ġin it
Ġrel ations
ac hed
Ġb ar
Ġ4 0
ĠT H
Ġ201 2
Ġv ol
Ġg round
Ġsec urity
Ġup d
il t
3 5
Ġconc ern
ĠJ ust
Ġwh ite
Ġseem s
ĠH er
pe cially
i ents
Ġann oun
Ġf ig
ight s
Ġst ri
l ike
id s
Ġs us
Ġw atch
Ġ â
Ġw ind
ĠC ont
Ġit self
Ġm ass
A l
y le
iqu e
ĠN ational
Ġab s
Ġp ack
Ġout side
Ġan im
Ġp ain
et er
Ġman ag
du ct
og n
Ġ ]
ĠSe pt
se c
o ff
ĠJ an
Ġf oot
ad es
Ġth ird
Ġm ot
Ġev idence
int on
Ġth reat
a pt
pl es
c le
Ġl o
Ġde cl
Ġit em
med i
Ġrep resent
om b
am er
Ġsignific ant
og raph
s u
Ġc al
i res
00 00
I D
A M
Ġsim ply
Ġlong er
Ġf ile
O T
c he
S o
ate g
or g
ĠH is
Ġen er
Ġd om
Ġup on
il i
": "
Ġthem selves
Ġcom ing
Ġqu ite
Ġdiff icult
ĠB ar
il ities
re l
end s
c ial
6 4
Ġwom an
ra p
y r
Ġne cess
ip s
Ġte xt
Ġrequ ire
Ġmilit ary
Ġre view
Ġresp ons
7 5
Ġsub ject
Ġinst ead
Ġiss ues
Ġg en
" ,"
Ġmin utes
Ġwe ap
r ay
am ed
t ime
b l
H ow
Ġc ode
ĠS m
Ġhig her
ĠSt e
r is
Ġp age
Ġstud ents
ĠIn tern
Ġmet hod
ĠA ug
ĠP er
ĠA g
Ġpolic y
ĠS w
Ġex ec
Ġac cept
um e
rib ut
Ġword s
Ġfin al
Ġchang es
ĠDem ocr
Ġfriend s
Ġres pect
Ġe p
Ġcomp an
iv il
Ġdam age
** **
og le
viron ment
Ġne g
ent al
Ġa p
Ġtot al
iv al
! "
l im
Ġneed s
Ġag re
Ġdevelop ment
Ġa ge
ip le
2 1
Ġresult s
ĠA f
S h
Ġg un
ĠOb ama
ro ll
Ġ @
Ġright s
ĠB rit
Ġrun ning
Ġwas n
Ġp ort
Ġr ate
Ġpret ty
Ġtarg et
Ġsa w
Ġc irc
Ġwor ks
ic ro
al t
o ver
ww w
Th at
l ier
Ġevery one
ud e
Ġp ie
idd le
ra el
Ġr ad
Ġbl ock
Ġw alk
T o
ã ģ
n es
ĠA ust
a ul
ro te
ĠS outh
ess ion
op h
Ġshow s
Ġs ite
Ġj o
Ġr isk
cl us
l t
Ġin j
id ing
ĠS pe
Ġch all
ir m
Ġ2 2
itt ing
st r
Ġh y
L E
ke y
Ġbe gan
at ur
ashing ton
l am
ĠD av
b it
Ġs ize
ĠP ar
3 8
ourn al
f ace
Ġdec ision
Ġl arg
Ġj ud
re ct
Ġcontin ue
ĠO ct
ove red
ĠI nt
==== ====
Ġp arent
ĠW ill
Ġeas y
Ġd rug
ang er
Ġs ense
Ġd i
id ay
Ġener gy
ist ic
Ġass oci
ar ter
ob al
e ks
ĠE l
ur ch
Ġg irl
o e
it le
Ġ2 8
ĠC he
Ġrequ est
Ġso on
Ġh ost
k y
Ġst ates
om es
Ġm aterial
le x
Ġmom ent
Ġan sw
on se
Ġes pecially
Ġn orm
Ġserv ices
p ite
r an
Ġro le
4 4
) :
Ġc red
C l
____ ____
Ġm at
Ġl og
ĠCl inton
O U
Ġoff ice
Ġ2 6
Ġch arg
Ġtr ack
m a
Ġhe art
Ġb all
Ġperson al
Ġbuild ing
n a
s et
b ody
ĠBl ack
Ġincre ase
itt en
Ġneed ed
3 6
3 2
= "
Ġl ost
Ġbec ame
Ġgrou ps
ĠM us
Ġw rote
ĠP e
Ġpro p
j oy
Ã ©
ĠWh ite
Ġde ad
. '
Ġhtt p
Ġwe bs
O S
Ġins ide
Ġwr ong
Ġstat ement
Ġ ...
y l
Ġfil m
Ġmus ic
Ġsh are
ific ation
Ġre lease
Ġfor ward
Ġst ay
Ġcomp ut
it te
s er
Ġorig inal
Ġc ard
Ġc and
Ġd iv
at ural
Ġfav or
O M
Ġc ases
us es
Ġse ction
Ġle ave
g ing
ov ed
ĠW ashington
3 9
ĠG l
Ġrequ ired
act ion
ap an
o or
it er
ĠK ing
Ġcount ries
ĠG erman
ll ing
Ġ2 7
3 4
Ġquest ions
Ġpr im
Ġc ell
Ġsh oot
Ġany one
ĠW est
Ġaff ect
ep end
Ġon line
ĠIs rael
ĠSept ember
Ġab ility
Ġcont ent
is es
Ġre ve
Ġl aun
Ġind ic
Ġfor ce
c ast
Ġso ld
av ing
f l
Ġso ft
Ġcompan ies
ce ed
Ġart icle
Ġa ud
Ġre v
Ġed uc
Ġplay ing
0 5
Ġhe ld
ct or
Ġrele ased
Ġf ederal
3 7
Ġad minist
Ġinter view
Ġinst all
Ġrece ived
Ġs ource
u k
P h
Ġser ious
Ġcre ated
Ġc ause
Ġim medi
Ġdef in
u el
ĠDep artment
ct ions
ĠC our
ĠN ow
z e
it es
it ution
Ġl ate
Ġspe ak
n ers
Ġleg al
ar i
ĠC or
Ġwe eks
Ġmod el
Ġp red
Ġex act
B C
ĠB y
IN G
os ing
Ġt akes
Ġreg ard
Ġopp ortun
Ġpr ice
Ġ19 8
ĠA pr
f ully
Ġor d
Ġproble ms
ru ction
h am
ĠC ount
le ge
Ġlead ers
E T
le v
Ġde ep
olog ical
es e
h aps
ĠS ome
Ġp ers
Ġcont ract
Ġrelations hip
s p
ou d
Ġb ase
4 8
m it
A d
anc ial
Ġcons um
Ġpot ential
Ġl angu
re m
et h
Ġrel ig
ress ed
6 6
Ġl ink
Ġl ower
ay er
ĠJ une
Ġf em
un t
er c
ur d
Ġcont act
Ġ ill
Ġm other
Ġest ab
h tt
ĠM arch
ĠB ro
ĠCh ina
Ġ2 9
Ġs qu
Ġprov ided
Ġa verage
as ons
Ġ201 1
Ġex am
l in
5 5
n ed
Ġper fect
Ġt ou
al se
u x
Ġbu y
Ġsh ot
Ġcol lect
Ġph ot
Ġplay ed
Ġsur pr
Ġofficial s
Ġsim ple
av y
Ġindust ry
Ġhand s
g round
Ġp ull
Ġr ound
Ġus er
Ġr ange
u ary
Ġpriv ate
op s
e es
Ġw ays
ĠM ich
Ġve h
Ġex cept
Ġter ms
im um
pp er
I ON
ore s
ĠDr agon
ou l
Ġd en
Ġperform ance
Ġb ill
c il
4 7
Ġen vironment
Ġex c
ad d
Ġwor th
Ġp ict
Ġch ance
Ġ201 8
b or
Ġspe ed
ict ion
Ġal leg
ĠJ apan
at ory
re et
Ġm atch
ĠI I
Ġst ru
ord er
Ġst e
Ġl iving
Ġst ruct
in o
Ġse par
her n
Ġresp onse
Ġen joy
Ġv ia
A D
um ents
ace book
Ġmem ber
ib r
iz ing
Ġto ol
ĠM on
ĠWh ile
h ood
ĠA ng
ĠD ef
Ġoff er
T r
a ur
Ġturn ed
ĠJ uly
d own
an ced
Ġrec ently
ĠE ar
Ġc e
ĠSt ar
ĠC ong
rough t
Ġbl ood
Ġhop e
Ġcom ment
ain t
Ġar ri
il es
Ġpartic ip
ough t
ri ption
0 8
4 9
Ġg ave
Ġse lect
Ġkill ed
sy ch
Ġgo es
i j
Ġc oll
Ġimp act
at ives
ĠS er
0 9
ĠAug ust
Ġb oy
d e
ĠD es
Ġf elt
U S
Ġexpect ed
Ġim age
ĠM ark
cc ording
o ice
E C
ĠM ag
en ed
h old
ĠP ost
Ġpre vent
N o
Ġinvol ved
Ġey es
Ġquick ly
A t
un k
Ġbeh av
Ġ ur
Ġl ed
c ome
e y
Ġcand id
Ġear lier
Ġfoc us
et y
P ro
led ge
ix ed
ill ed
Ġpop ular
A P
Ġset t
l ight
Ġvar ious
in ks
Ġlevel s
Ġro ad
ell ig
ab les
he l
itte e
ĠG ener
y pe
Ġhe ard
ic les
Ġm is
Ġus ers
ĠS an
Ġimpro ve
Ġf ather
Ġse arch
The y
v il
Ġprof ess
Ġkn ew
Ġl oss
Ġev ents
6 5
Ġb illion
0 7
0 2
ĠNew s
ĠA M
Ġco ver
w here
ens ion
Ġb ott
Ġare as
en ces
op e
ĠTw itter
a el
Ġget s
ĠGo ogle
Ġs n
i ant
Ġv ote
Ġnear ly
Ġinclud ed
Ġrec ogn
z z
m m
al ed
Ġhappen ed
0 4
Ġh ot
Ġwho se
Ġc ivil
Ġsu ff
o es
it iz
ĠSy ri
Ġresp ond
Ġh on
Ġfeat ures
Ġeconom ic
ĠApr il
r im
Ġtechn ology
Ġo ption
ag ing
Ġpur ch
R e
Ġl at
ch ie
is l
Ġrec omm
u f
Ġtr aining
Ġeffect s
Ġf ast
Ġ201 0
Ġocc ur
Ġwebs ite
Ġem ail
Ġs ens
e ch
Ġo il
Ġinf lu
Ġcurrent ly
ĠS ch
ĠAd d
Ġgo al
Ġsc ient
Ġcon v
1 00
em y
Ġdec ided
Ġtra vel
Ġm ention
L L
0 3
Ġe lection
Ġph one
Ġlook s
Ġsit uation
Ġc y
Ġh or
b ed
ĠCour t
a ily
av es
Ġqu ality
ĠCom p
w ise
Ġt able
Ġst aff
ĠW ind
et t
Ġtri ed
ide red
Ġadd ition
Ġb ox
Ġl ack
ar ily
Ġw ide
Ġm id
Ġbo ard
ys is
Ġant i
h a
Ġd ig
en ing
Ġd ro
C on
6 8
Ġsl ow
b ased
se qu
Ġp ath
E x
ak er
Ġwork ed
Ġp en
Ġeng ine
Ġlook ed
ĠSu per
ĠS erv
Ġvict im
U n
Ġproper ty
Ġint rodu
Ġexec ut
ĠP M
L e
Ġcol or
ĠM ore
Ġ6 0
Ġnet work
Ġd ate
c ul
id ge
Ġext ra
3 1
Ġs le
6 7
Ġw ond
Ġreport s
j ust
ĠAust ral
Ġcap ital
Ġen s
Ġcomm and
Ġallow ed
Ġpre p
Ġca pt
h ib
Ġnum bers
ch an
Ġf air
m p
om s
Ġre ach
W ith
t ain
Ġbro ad
Ġcou ple
ec ause
ly ing
ĠF eb
Ġsc reen
Ġl ives
Ġpri or
ĠCong ress
A r
Ġappro ach
Ġe mer
ar ies
ĠD is
s erv
ĠN e
Ġbu ilt
c ies
Ġre pe
Ġrul es
for ce
ĠP al
Ġfin ancial
Ġcons idered
ĠCh ar
n ces
ĠI S
Ġb rought
Ġb i
i ers
ĠS im
O P
Ġproduct s
Ġvis it
Ġdoc ument
Ġcon duct
Ġcomplete ly
in ing
ĠCal if
ib ly
Ġwr itten
ĠT V
em ents
Ġd raw
O ne
Ġpub lished
Ġsec ret
r ain
he t
ĠF acebook
ond ay
ĠU p
Ġsex ual
Ġth ous
ĠP at
Ġ ess
Ġstand ard
Ġar m
g es
ect ion
Ġf ell
Ġfore ign
an i
ĠFr iday
Ġreg ular
in ary
Ġincre ased
Ġus ually
Ġdem on
Ġd ark
Ġadd itional
ro l
ĠO f
Ġprodu ction
! !
und red
Ġintern ational
id ents
ĠF ree
rou p
Ġr ace
Ġm ach
Ġh uge
A ll
le ar
ove mber
Ġto wn
Ġatt ention
ĠO ff
y ond
ĠThe n
f ield
Ġter ror
ra z
ĠB o
Ġmeet ing
ĠP ark
Ġar rest
Ġf ear
Ġa w
ĠV al
or ing
' ,
Ġext reme
ar r
Ġwork ers
A fter
Ġ3 1
n et
am ent
Ġdirect ly
Ġpop ulation
ub e
ĠOct ober
ĠI N
ĠJan uary
5 9
ĠDav id
Ġc ross
ce mber
ĠF irst
Ġmess age
ir it
Ġn ation
Ġp oll
is ions
Ġansw er
n y
is ode
Ġcar ry
ĠRuss ia
Ġhe ar
eng th
ro y
Ġn atural
in ally
Ġdo g
m itted
Ġtr ade
Ġsub st
Ġmult iple
ĠAf ric
Ġf ans
Ġs ort
Ġgl obal
ic ation
ĠW ed
ar a
Ġa chie
Ġlangu age
ve y
Ġt al
Ġnecess ary
Ġdet ails
Ġs en
ĠS und
ĠRe g
ĠR ec
0 6
Ġs il
ress ive
Ġmed ical
un ch
orn ia
Ġu nd
f ort
oc ks
ĠM onday
ues day
c raft
7 7
ur t
Ġ ver
ĠH ill
Ġrece ive
Ġmor ning
es tern
Ġb ank
Ġs at
ir th
ĠH igh
Ġdev ice
ĠTH E
ĠCent er
Ġsaf e
Ġp le
ĠCanad a
Ġsystem s
Ġass ist
Ġsur v
Ġb attle
ĠS oc
vert is
S he
Ġp aper
Ġgrow th
Ġc ast
S c
Ġpl ans
ll ed
Ġpart s
Ġw all
Ġmove ment
Ġpract ice
im ately
Ġdis play
Ġsomet imes
om p
ĠP aul
ĠY es
k ing
5 8
o ly
Ġs on
Ġav oid
ok es
ĠJ ew
Ġto wards
as c
Ġ //
ĠK ore
Ġtalk ing
Ġcor rect
Ġsp ent
ic ks
i able
e ared
Ġter m
Ġwant s
om ing
Ġ ut
Ġdou b
Ġfor ces
Ġp lease
6 9
ĠN ovember
at form
ond on
Ġon es
Ġimmedi ately
ĠRuss ian
ĠM et
Ġde g
Ġparent s
C H
ĠAmeric ans
al y
ĠM od
Ġsh own
Ġcond itions
Ġst uff
Ġre b
ĠY our
Ġinclud es
n own
ĠS am
Ġexper ien
m ission
ĠE ven
augh t
Ġannoun ced
ĠRepublic an
Ġdeter min
Ġdescrib ed
ĠCount y
( )
Ġdo or
Ġchang ed
Ġne igh
ĠH ere
Ġcle an
Ġp an
ĠDe cember
ĠEurope an
ir ing
ap ter
Ġcl ub
ĠT uesday
Ġp aid
ĠN et
Ġattack s
Ġcharact ers
Ġal one
Ġdirect or
d om
Ġ3 5
Ġl oad
Ġr out
ĠCalif ornia
Ġfin ally
Ġr ac
Ġcont r
Ġexact ly
res h
p ri
ĠIs lam
Ġn ature
Ġcare er
Ġlat est
Ġcon vers
ĠS l
p ose
ci ent
ĠIn c
iv ity
8 8
ĠA tt
ĠM or
nes day
Ġwe ight
k en
Ġnot e
Ġteam s
Ġ \
air s
ĠG reen
Ġh undred
on ent
Ġstre ng
Ġcons ist
ic ated
Ġreg ul
Ġl ic
ast ic
Ġt en
urs day
ellig ence
ous ly
ĠU K
B I
Ġcost s
Ġind epend
ĠA P
Ġnorm al
Ġh om
Ġob vious
Ġs we
Ġst ar
Ġread y
ac her
Ġimp lement
g est
Ġs ong
ĠG et
ĠL ab
Ġinterest ing
us ing
Ġg iving
ĠSund ay
Ġet c
Ġm iddle
Ġrem ember
r ight
os ition
ut ions
Ġm ax
4 6
Ġyour self
Ġdem and
Ġtreat ment
Ġd anger
ĠC ons
Ġgu y
ĠBrit ish
Ġphys ical
Ġrel ated
Ġrem ain
Ġcould n
Ġref er
Ġc itiz
b ox
EN T
bo ard
Ġin n
I G
er o
ĠSt reet
osp ital
ren ch
cher s
Ġst ra
O L
ag er
ĠA N
Ġeas ily
I A
en ge
in y
Ġcl os
ock ed
Ġus es
ĠC oun
I m
u ild
? ?
m ore
Ġan g
Ġwr ite
ol ute
5 7
Ġlead er
Ġread ing
< /
Ġaut om
est s
4 3
Ġleg isl
ĠG old
Ġdesign ed
ĠS T
ĠLe g
a res
Ġbe aut
ĠT ex
Ġappear s
Ġstru gg
ĠR om
Ġ 00
Ġcho ice
Ġparticular ly
ĠF rom
op er
ĠL ondon
ann ed
Ġallow s
ob ile
Ġdiffere nce
âĢ ¢
ĠV iew
ĠWed nesday
Ġal though
Ġrel ative
Ġapplic ation
ate ver
Ġare n
Ġmy self
Ġim ag
Ġdis e
Ġsoc iety
Ġfre qu
ĠEng lish
Ġpo or
ĠD ay
Ġwrit ing
Ġse ven
Ġstart ing
Ġb ud
Ġpr int
ĠTr ans
uf act
ĠSt ud
n ew
Ġcr im
Ġg ives
Ġco ol
a e
i ance
ĠGener al
Ġthink ing
Ġsa ve
Ġlim ited
ĠPart y
Ġmean ing
p en
ow ers
ĠJ ack
E M
Ġn ice
ru pt
Ġg as
Ġe ight
Ġfe et
Ġeff ort
Ġ ign
ic it
B l
co in
Ġop in
Ġbr ain
Wh ile
he st
ĠTh ursday
Ġwould n
augh ter
Ġtou ch
le ments
Ġstud ies
Ġcent er
c ont
or ge
Ġcomput er
Ġinvestig ation
P l
or ks
Ġ200 8
Ġincre asing
Ġst ore
Ġcom ments
Ġb al
m en
Ġdo ll
Ġl iber
Ġw ife
Ġlaw s
atur day
it ness
Ġmod ern
ĠS k
Ġadminist ration
Ġopportun ity
Ġs al
Ġpower ful
M y
Ġclaim s
ĠEar th
ord s
Ġt itle
Ġes c
n ame
N ot
om en
Ġbe yond
Ġc amer
Ġse ll
it ute
ear ch
Ġapp l
im ent
4 2
ĠAr t
Ġun f
Ġviol ence
ur g
ĠE ast
Ġcomp ared
Ġopt ions
Ġthrough out
Ġv s
ig r
. [
ac hes
7 8
Ġfil es
F L
E L
ar ian
ĠJ ames
ĠA ir
an ch
Ġdet ail
Ġpie ce
P S
Ġn amed
Ġeduc ation
Ġdri ve
Ġitem s
Ġstud ent
ic ed
: :
ic o
Ġth row
Ġsc ene
Ġcomple x
Ġ200 9
Ġpre c
ĠB re
7 9
Ġcon cept
Ġstat us
am ing
Ġd ied
Ġknow ledge
Ġbegin ning
O D
ru ary
Ġcertain ly
Ġgu ys
Ġsl ight
in n
ound s
Ġf ine
Ġf at
ic ations
Ġper haps
ĠA nt
Ġinc ome
Ġhtt ps
Ġmajor ity
port s
st on
Ġgreat er
Ġfe ed
ent ially
Ġsaf ety
Ġun ique
and om
Ġg one
Ġshow ed
Ġhist or
Ġcoun ter
i us
id a
Ġlead ing
i pe
Ġs end
ĠDon ald
er ve
Ġdef ense
ines e
Ġy es
ĠF ire
ĠMus lim
ra q
Ġcontin ued
os h
Ġprov ides
Ġpr ison
ĠP re
Ġhapp y
Ġeconom y
Ġtr ust
ag s
ĠG ame
Ġweap ons
um an
ĠC le
it ation
Ġanal ysis
ĠT imes
Ġsc ience
- >
Ġfig ure
Ġdis app
ent y
Ġsoft ware
Ġu lt
Ġoffic ers
N ew
I s
Ġrem ains
ĠInd ia
Ġp sych
ri ef
Ġc at
es c
Ġob serv
Ġst age
ĠD ark
Ġent er
ch ange
Ġpass ed
Ġdes pite
ĠO ut
Ġmov ie
r s
Ġv oice
m ine
ĠPl ay
Ġto ward
ĠT er
Ġreg ion
Ġval ues
or ters
Ġm ount
Ġoffic er
ĠO ther
b an
Ġh ous
w ood
ro om
I V
ĠS un
se e
ĠO ver
ro g
9 0
Ġl ay
ĠT ur
a wn
Ġpress ure
ĠS ub
Ġbook s
ed om
ĠS and
A A
ag o
Ġre asons
f ord
Ġactiv ity
U T
N ow
ĠSen ate
ce ll
n ight
Ġcall s
in ter
Ġlet ter
ĠR ob
ĠJ e
Ġcho ose
ĠL aw
G et
B e
Ġro b
Ġtyp es
Ġpl atform
Ġqu arter
R A
ĠT ime
Ġmay be
ĠC r
9 5
p re
Ġmov ing
Ġl if
Ġgo ld
Ġs om
Ġpat ients
Ġtr uth
ĠK e
ur ance
ant ly
m ar
Ġchar ge
ĠG reat
Ġce le
---------------- ----------------
Ġro ck
ro id
an cy
Ġcred it
a ud
B y
ĠE very
Ġmov ed
ing er
rib ution
Ġn ames
Ġstra ight
ĠHe alth
ĠW ell
Ġfe ature
Ġr ule
Ġsc he
in ated
ĠMich ael
ber g
4 1
il ed
b and
Ġcl ick
ĠAng el
on ents
Â Ń
ĠI raq
ĠS aturday
Ġa ware
p art
Ġpat tern
O W
ĠL et
Ġgr ad
ign ed
Ġassoci ated
Ġst yle
n o
i ation
a ith
il ies
Ġst ories
ur ation
Ġindividual s
ĠâĢ ¦
m iss
ĠAss oci
ish ing
ab y
Ġsum mer
ĠB en
Ġ3 2
Ġar ch
ut y
ĠTex as
h ol
Ġfull y
Ġm ill
Ġfollow ed
ĠB ill
ĠInd ian
ĠSec ret
ĠB el
ĠFeb ruary
Ġjob s
Ġseem ed
ĠGo vern
i pped
Ġreal ity
Ġl ines
Ġp ark
Ġmeas ure
ĠO ur
I M
Ġbro ther
Ġgrow ing
Ġb an
Ġest im
Ġc ry
ĠS chool
Ġme chan
ĠO F
ĠWind ows
Ġr ates
ĠO h
Ġpos itive
Ġcult ure
ist ics
ic a
Ġh ar
y a
ite ly
i pp
Ġm ap
en cies
ĠWill iam
I I
ak ers
5 6
ĠM art
ĠR em
Ġal tern
it ude
Ġco ach
row d
D on
Ġk ids
Ġj ournal
Ġcor por
Ġf alse
Ġwe b
Ġsle ep
Ġcont ain
Ġst o
Ġb ed
iver se
ĠR ich
ĠCh inese
Ġp un
Ġme ant
k nown
Ġnot ice
Ġfavor ite
a ven
Ġcond ition
Ġpur pose
) )
Ġorgan ization
Ġchall eng
Ġman ufact
Ġsus p
ĠA c
Ġcrit ic
un es
uc lear
Ġm er
vent ion
Ġ8 0
Ġm ist
ĠU s
ĠT or
htt p
ol f
Ġlarg er
Ġadv ant
Ġrese ar
Ġact ions
m l
Ġke pt
Ġa im
, '
c ol
Ġbenef its
if ying
Ġact ual
ĠIntern ational
Ġveh icle
Ġch ief
Ġeff orts
ĠLe ague
ĠM ost
Ġwa it
Ġad ult
Ġover all
Ġspe ech
Ġhigh ly
Ġfem ale
Ġer ror
Ġeffect ive
5 4
Ġenc our
w ell
Ġfail ed
Ġcons erv
Ġprogram s
Ġt rou
Ġa head
5 00
vertis ement
I P
ĠF ound
p ir
Ġ %
Ġcr ime
and er
Ġloc ation
ĠI ran
Ġbehav ior
az ing
Ġr are
Ġem b
Ġca used
Ġsh ip
Ġact ive
Ġcont ribut
Ġg reen
Ġac qu
Ġref lect
ven ue
Ġf irm
Ġb irth
] .
Ġclear ly
Ġem ot
Ġag ency
ri age
Ġmem ory
9 8
S A
ĠSe e
ac ing
C C
Ġbig gest
Ġr ap
Ġbas ic
Ġb and
e at
Ġsus pect
ĠM ac
Ġ9 0
m ark
ist an
Ġsp read
am s
k i
as y
ra v
ĠR ober
Ġdemon str
r ated
Ġabs olute
Ġpl aces
Ġim pl
ibr ary
Ġc ards
Ġdest roy
Ġv irt
ve re
Ġapp eared
y an
p oint
Ġbe g
Ġtem per
s pe
ant ed
ear s
ĠD irect
Ġl ength
Ġbl og
am b
Ġint eg
Ġres ources
ac c
if ul
Ġsp ot
Ġfor ced
Ġthous ands
ĠMin ister
Ġqu al
ĠF rench
at ically
Ġgener ally
Ġdr ink
Ġth us
I L
od es
Ġappro pri
ĠRe ad
Ġwh om
Ġey e
Ġcol lege
Ġ4 5
ire ction
Ġens ure
Ġapp arent
id ers
Ġrelig ious
Ġmin or
ol ic
Ġt ro
ĠWh y
rib ute
m et
Ġprim ary
Ġdevelop ed
Ġpe ace
Ġsk in
st e
av a
Ġbl ue
Ġfam ilies
Ġ ir
Ġapp ly
Ġin form
ĠSm ith
C T
i i
Ġlim it
Ġres ist
........ ........
um n
Ġconf lic
Ġtw e
ud d
ĠT om
Ġl iter
qu e
b on
Ġha ir
Ġevent ually
Ġp us
Ġhelp ed
Ġag g
or ney
ĠApp le
Ġf it
ĠS ur
Ġpre m
Ġs ales
Ġsecond s
Ġstreng th
Ġfeel ing
¿ ½
Ġt our
Ġknow s
o om
Ġex erc
Ġsom ew
ï ¿½
> >
Ġsp okes
Ġide as
Ġreg ist
so ft
ĠD el
ĠP C
Ġpro pos
Ġlaun ch
Ġbott om
T H
ĠP lease
v est
it z
ĠIn ter
Ġsc ript
Ġr at
ar ning
Ġ il
ĠJ er
ĠA re
Ġwh atever
ok en
ci ence
Ġmod e
Ġag ree
Ġs ources
Ġinit ial
Ġrest rict
Ġwond er
us ion
## ##
ĠS il
vil le
Ġb urn
t w
as ion
ĠÂ £
Ġn or
u ing
Ġre ached
Ġs un
Ġc ateg
ig ration
Ġc ook
Ġprom ot
Ġm ale
Ġcl imate
Ġf ix
Ġalleg ed
U R
all ed
Ġim ages
C ont
ot a
Ġschool s
i os
Ġd rop
Ġst ream
ĠM o
Ġprevious ly
al ing
Ġp et
Ġdou ble
Ġ( @
ann el
Ġdef ault
t ies
Ġr ank
ĠD ec
ĠCoun cil
Ġweap on
Ġst ock
Ġanal y
ĠSt r
Ġpict ure
ĠPol ice
f erence
Ġcent ury
Ġcitiz ens
Ġon to
Ġexp and
Ġhe ro
ĠS ol
Ġw ild
Ġupd ate
Ġcustom ers
r ont
d ef
Ġl ik
Ġcrim inal
ĠChrist ian
S P
7 6
Ġle aving
Ġother wise
ĠD ist
Ġbas is
5 2
5 3
ic ip
ĠB er
Ġrecomm end
Ġfl oor
Ġc rowd
ol es
Ġ7 0
Ġcent ral
ĠE v
Ġd ream
Ġdown load
Ġconf ir
ĠTh om
Ġwind ow
Ġhapp ens
Ġun it
Ġt end
Ġs pl
Ġbec omes
Ġfight ing
Ġpred ict
ĠP ress
ĠP ower
Ġhe avy
ak ed
Ġf an
or ter
ate gy
B A
iz es
Ġsp end
H ere
Ġ200 7
Ġad op
ĠH am
Ġfoot ball
ĠP ort
od ay
5 1
amp ions
Ġtrans fer
h t
Ġ3 8
ter m
ac ity
Ġb ur
] ,
tern al
r ig
b ut
Ġthere fore
ĠB ecause
res p
re y
Ġm ission
S ome
Ġnot ed
Ġass um
Ġdise ase
Ġed it
Ġprog ress
r d
ĠB rown
oc al
Ġadd ing
Ġra ised
ĠAn y
Ġt ick
Ġsee ing
ĠPe ople
Ġagre ement
Ġser ver
Ġw at
Ġdeb ate
Ġsupp osed
il ing
Ġlarg est
Ġsuccess ful
ĠP ri
ĠDemocr atic
Ġj ump
ĠSyri a
Ġown ers
Ġoff ers
Ġshoot ing
Ġeff ic
se y
Ġha ven
ver se
te red
ĠL ight
im al
ĠB ig
Ġdef end
Ġbe at
Ġrecord s
% )
Ġsc en
Ġemploy ees
Ġdev ices
he m
Ġcom mer
ĠM ex
Ġbenef it
ĠPro f
Ġil leg
Ġsur face
ĠAl so
Ġh arm
ing ly
w ide
ĠA lex
Ġsh ut
ĠC ur
Ġl ose
p m
Ġchall enge
se mb
Ġst ation
Ġint elligence
Ġacc ur
ĠFl or
Ġrequ ires
ĠM al
b um
Ġh ospital
Ġsp irit
Ġoff ered
Ġprodu ce
ĠComm un
Ġcreat ing
Ġcr is
s pect
Ġend ed
Ġd aily
Ġvot ers
land s
i as
i h
on a
Ġsm art
ĠOff ice
ĠL ord
ri al
ĠIntern et
Ġcirc um
Ġextreme ly
' .
Ġopin ion
ĠM il
Ġg ain
B S
ĠF in
y p
Ġuse ful
Ġbud get
Ġcom fort
is f
Ġback ground
el ine
Ġep isode
Ġen emy
Ġtri al
Ġestab lish
d ate
ĠC ap
Ġcontin ues
Ġshow ing
ĠUn ion
w ith
Ġpost ed
ĠSy stem
Ġe at
ri an
Ġr ise
ĠGerman y
il s
Ġsign ed
Ġv ill
Ġgr and
m or
ĠEng land
Ġproject s
um ber
Ġconf erence
z a
Ġrespons ible
ĠAr ab
Ġlearn ed
âĢĶ âĢĶ
i pping
ĠGe orge
O C
Ġreturn ed
ĠAustral ia
Ġb rief
Q u
Ġbr and
ill ing
ab led
Ġhig hest
Ġtr ain
ĠComm ission
wh ile
Ġn om
cept ion
Ġm ut
ĠBl ue
Ġinc ident
v ant
8 6
ĠI D
Ġn uclear
7 4
ĠL ike
ĠR E
ĠM icro
l i
m ail
Ġcharg es
8 9
Ġad just
ad o
Ġear th
N A
Ġpr ices
P A
Ġd raft
Ġrun s
Ġcandid ate
ens es
Ġmanag ement
ĠPh il
ĠM iss
Ġte ach
g ram
Ġunderstand ing
a it
ic ago
A dd
ĠE p
sec ut
Ġsepar ate
Ġinst ance
Ġe th
Ġun less
**** ****
ĠF ore
in ate
Ġoper ations
S p
Ġf aith
g ar
ĠCh urch
ron ic
Ġconf ig
os ure
Ġactiv ities
Ġtrad itional
Ġ3 6
Ġd irection
Ġmach ine
Ġsur round
Ġp ush
un ction
ĠE U
Ġeas ier
Ġarg ument
G B
Ġm icro
Ġsp ending
iz ations
Ġthe ory
ad ow
Ġcall ing
ĠL ast
Ġd er
Ġinflu ence
Ġcomm it
Ġph oto
Ġun c
ist ry
g n
ast e
ack s
Ġdis p
ad y
d o
ĠG ood
Ġ `
Ġw ish
Ġreve aled
Âł Âł
l ig
Ġen force
ĠComm ittee
Ġche m
Ġmil es
Ġinterest ed
Ġsol ution
ic y
in ct
Ġ- >
ĠD et
Ġrem oved
Ġcomp ar
e ah
Ġpl ant
ĠS ince
Ġachie ve
Ġadvant age
Ġslight ly
b ing
Ġpl aced
u nder
201 5
ĠM ad
Ġt im
os es
Ġc ru
ĠR ock
Ġmost ly
Ġneg ative
Ġset ting
Ġprodu ced
Ġm ur
Ġconnect ion
ĠM er
Ġdri ver
Ġexecut ive
Ġass ault
Ġb orn
ĠV er
t ained
Ġstruct ure
Ġredu ce
Ġdec ades
Ġd ed
u ke
ĠM any
idd en
Ġle ague
S e
Ġjo in
Ġdis co
Ġd ie
c ks
act ions
Ġass ess
ag n
Ġgo als
our s
I R
Ġsen ior
ill er
m od
ip ment
oc ol
u y
ĠQ ue
Ġpart ies
ir gin
Ġle arning
it able
Ġstre et
Ġcamer a
A pp
Ġsk ills
b re
c ious
Ġcele br
ĠFr anc
Ġexist ing
Ġwill ing
l or
Ġ id
ĠSp ace
Ġcrit ical
ĠL a
ortun ately
Ġser ve
Ġc old
Ġspec ies
T S
Ġanim als
ĠB ay
Ġold er
ĠU nder
est ic
ĠT re
Ġte acher
Ġpre fer
v is
Ġth read
ĠM att
Ġmanag er
ãĥ »
Ġprofess ional
ĠV ol
Ġnot es
The se
ul a
Ġf resh
ent ed
u zz
ed y
clus ion
ĠR el
Ġdoub t
E O
Ġopen ed
ĠB it
Ad vertisement
Ġgu ess
ĠU N
Ġse qu
Ġexpl ain
ott en
Ġatt ract
ak s
Ġstr ing
Ġcont ext
oss ible
ĠRepublic ans
Ġsol id
Ġc ities
Ġask ing
Ġr andom
u ps
ur ies
ar ant
dd en
g l
ĠFlor ida
Ġdep end
ĠSc ott
Ġ3 3
Ġi T
ic on
Ġmention ed
Ġ2 000
Ġclaim ed
Ġdefin itely
ul f
Ġc ore
Ġopen ing
ĠCon st
wh ich
ĠT ra
A G
7 2
Ġbelie ved
ad a
Ġ4 8
ĠSec urity
yr ight
ĠP et
ĠL ou
Ġhold ing
======== ========
Ġ ice
Ġb row
Ġauthor ities
h ost
w ord
Ġsc ore
ĠD iv
Ġcell s
Ġtrans l
Ġneigh bor
Ġrem ove
u ct
Ġdist rict
ĠA ccording
Ġwor se
Ġconcern s
Ġpresident ial
Ġpolic ies
ĠH all
7 3
Ġh us
A Y
Ġ200 6
ĠJ ud
Ġindepend ent
ĠJust ice
ili ar
pr int
igh ter
Ġprotect ion
z en
Ġsu dden
h ouse
ĠJ es
P R
ĠIn f
Ġb ul
Ġ _
ĠServ ice
ĠP R
Ġstr ategy
ff ect
Ġgirl s
Ġmiss ing
oy al
ĠTe am
ul ated
Ġd at
Ġpolit ics
ab or
A ccording
Ġspe ll
Ġg raph
ort hern
T C
A b
Ġlab or
is her
Ġk ick
ĠiT unes
Ġstep s
pos es
Ġsmall er
E n
ber t
Ġro ll
Ġresear chers
Ġcl osed
Ġtrans port
Ġlaw y
________ ________
ĠCh icago
Ġas pect
Ġn one
Ġmar riage
9 6
Ġe lements
ĠF re
ĠS al
Ġd ram
F C
t op
e qu
Ġhe aring
Ġsupport ed
Ġtest ing
co hol
Ġmass ive
Ġst ick
Ġgu ard
is co
ph one
F rom
How ever
Ġb order
Ġcop y
ograph y
l ist
7 1
Ġown er
cl ass
ru it
r ate
ĠO nce
Ġdig ital
Ġt ask
ER S
Ġinc red
t es
+ +
ĠFr ance
Ġb reat
ow l
Ġiss ued
ĠW estern
Ġdet ect
Ġpart ners
Ġsh ared
ĠC all
Ġcan cer
ac he
rib e
Ġexpl ained
Ġhe at
{ "
Ġinvest ment
ĠB ook
Ġw ood
Ġtool s
ĠAl though
Ġbelie f
Ġcris is
Ġg e
ĠM P
Ġoper ation
ty pe
~ ~
g a
Ġcont ains
ant a
Ġexp ress
ĠG roup
ĠJ ournal
k a
Ġam b
ĠUS A
Ġfind ing
Ġfund ing
h ow
Ġestab lished
ide os
Ġdeg ree
Ġdanger ous
ang ing
Ġfre edom
pp ort
out hern
Ġch urch
Ġc atch
ĠTw o
Ġpres ence
ĠGu ard
U p
Ġauthor ity
ĠPro ject
Ġbut ton
Ġcon sequ
Ġval id
Ġwe ak
Ġstart s
Ġref erence
ĠM em
" )
U N
or age
ĠO pen
Ġcol lection
y m
g ency
Ġbeaut iful
ro s
Ġtell s
Ġwa iting
n el
Ġprov iding
ĠDemocr ats
Ġd aughter
Ġm aster
Ġpur poses
ĠJapan ese
Ġequ al
Ġturn s
Ġdoc uments
Ġwatch ing
R es
Ġr an
201 4
Ġre ject
ĠKore a
Ġvictim s
Le vel
ere nces
Ġw itness
Ġ3 4
Ġre form
com ing
Ġocc up
Ġc aught
Ġtra ffic
ad ing
Ġmod els
ar io
Ġserv ed
Ġb atter
u ate
ĠSecret ary
Ġagre ed
Ġtr uly
yn am
ĠR et
Ġun its
ĠRes earch
h and
az ine
ĠM ike
Ġvar iety
ot al
Ġam azing
Ġconfir med
Ġentire ly
Ġpurch ase
Ġe lement
Ġc ash
Ġdeter mine
D e
Ġc ars
ĠW all
â ĸ
Ġview s
Ġdrug s
Ġdep artment
ĠSt ep
u it
Ġ3 9
as ure
ĠCl ass
Ġc overed
ĠB ank
Ġme re
u ana
Ġmult i
Ġm ix
Ġun like
lev ision
Ġsto pped
Ġs em
ĠG al
ul es
Ġwe l
ĠJohn son
l a
Ġsk ill
Ġbec oming
ri e
Ġappropri ate
f e
ell ow
ĠPro t
ul ate
oc ation
Ġweek end
od ies
Ġsit es
Ġanim al
ĠT im
Ġsc ale
Ġcharg ed
Ġinst ruct
ill a
Ġmethod s
Ġc ert
Ġjud ge
ĠH el
Ġdoll ars
Ġstand ing
ĠS qu
Ġdeb t
l iam
Ġdri ving
ĠS um
ĠEd ition
Ġal bum
and on
I F
ĠU k
6 3
ad er
Ġcommer cial
es h
ĠGovern ment
Ġdisc overed
Ġout put
ĠHill ary
ĠCar ol
Ġ200 5
Ġab use
anc ing
Ġsw itch
Ġann ual
T w
Ġst ated
ag ement
in ner
Ġdem ocr
Ġres idents
Ġallow ing
Ġfact ors
od d
Ġf uck
em ies
Ġoccur red
ot i
Ġn orth
ĠP ublic
Ġinj ury
Ġins urance
C L
oll y
ã Ģ
Ġrepe ated
Ġar ms
ang ed
Ġconst ruction
Ġf le
P U
ic ians
Ġfor ms
ĠMc C
ant ic
Ġm ental
p ire
Ġequ ipment
Ġf ant
Ġdiscuss ion
Ġregard ing
k in
ar p
Ġch air
og ue
Ġpro ceed
ĠI d
O ur
Ġmur der
M an
Ġ4 9
as p
Ġsupp ly
Ġin put
Ġwe alth
liam ent
Ġpro ced
or ial
ĠSt at
ĠN FL
hen s
ĠInst itute
Ġput ting
ourn ament
et ic
Ġloc ated
Ġk id
er ia
r un
Ġpr inc
Ġ !
go ing
ĠB et
Ġcl ot
Ġtell ing
Ġprop osed
i ot
or ry
Ġfund s
g ment
ĠL ife
Ġb aby
ĠB ack
Ġsp oke
Im age
Ġear n
ĠA T
g u
Ġex change
ĠL in
ov ing
Ġp air
M ore
az on
Ġarrest ed
Ġkill ing
c an
ĠC ard
y d
Ġident ified
Ġm obile
Ġthan ks
ony m
ĠF orm
Ġhundred s
ĠCh ris
ĠC at
Ġtre nd
h at
ĠA v
om an
Ġelect ric
ĠW il
S E
O f
Ġrest aur
ot ed
Ġtr ig
Ġn ine
Ġb omb
Wh y
Â ¯
Ġco verage
Ġapp eal
ĠRober t
ĠS up
Ġfin ished
Ġfl ow
Ġdel iver
Ġcal cul
Ġphot os
Ġph il
Ġpie ces
Ġapp re
k es
Ġr ough
D o
Ġpart ner
Ġconcern ed
Ġ3 7
ĠG en
C ol
ct ors
Ġ= >
st ate
Ġsuggest ed
ĠFor ce
C E
Ġher self
ĠPl an
w orks
o oth
ren cy
Ġcor ner
Ġhus band
Ġintern et
ĠA ut
em s
os en
ĠAt l
g en
Ġbal ance
6 2
Ġsound s
te xt
Ġar r
ov es
Ġmill ions
Ġrad io
Ġsat isf
ĠD am
M r
G o
S pe
Ġcomb at
r ant
ĠG ree
Ġf uel
Ġdist ance
Ġtest s
Ġdec re
ĠE r
Ġman aged
D S
Ġt it
Ġmeas ures
ĠL iber
Ġatt end
as hed
ĠJ ose
ĠN ight
d it
ĠN ov
ĠE nd
out s
Ġgener ation
Ġadv oc
y th
Ġconvers ation
ĠS ky
act ive
ce l
ri er
ĠFr ank
Ġg ender
Ġcon cent
Ġcar ried
and a
ĠV irgin
Ġarri ved
ic ide
ad ed
Ġfail ure
Ġmin imum
le ts
Ġwor st
Ġkeep ing
Ġint ended
Ġilleg al
Ġsub sc
Ġdetermin ed
Ġtri p
Y es
Ġra ise
Ġ ~
Ġfeel s
Ġpack age
ĠJ o
h i
201 6
re al
Ġf ra
Ġsy mb
M e
uck y
p ret
ĠK h
ĠEd it
ĠWe b
em ic
ĠCol or
Ġjust ice
I nt
Ġfar m
ck now
" >
el ess
Ġredu ced
Ġ5 00
x x
ĠR ad
ĠW ood
Ġcl in
Ġhy p
il er
ur a
k ins
8 5
6 1
ĠThe ir
ĠM ary
Ġs an
Ġno vel
ĠWh o
Ġcap acity
Ġimp ossible
Ġpl ays
Ġmin ister
ij uana
ic ate
ĠS et
Ġf ram
Ġ ing
Ġcommun ities
ĠF BI
it a
Ġb on
Ġstr ateg
Ġinterest s
l ock
g ers
m as
ĠAN D
Ġconflic t
Ġrequire ments
Ġs ac
Ġoper ating
in i
rel ated
Ġcomm itted
Ġrelative ly
Ġs outh
Â¯ Â¯
Ġaff ord
Ġident ity
Ġdec isions
Ġacc used
pl ace
Ġvict ory
o ch
i at
N ame
C om
t ion
ed s
Ġsee k
Ġt ight
ĠIm ages
Ġinit i
Ġhum ans
Ġfam iliar
Ġaud ience
Ġintern al
vent ure
Ġs ides
ĠT O
Ġd im
Ġcon clud
Ġapp oint
Ġenforce ment
ĠJ im
ĠAssoci ation
Ġcircum st
ĠCanad ian
Ġjo ined
Ġdiffere nces
ĠL os
Ġprot est
Ġtw ice
w in
Ġgl ass
ars h
ĠAr my
Ġexp ression
Ġdec ide
Ġplan ning
an ia
Ġhand le
ĠMicro soft
ĠN or
Ġmax imum
ĠRe v
Ġse a
Ġev al
Ġhel ps
re f
Ġb ound
Ġm outh
Ġstand ards
Ġcl im
ĠC amp
ĠF ox
cl es
Ġar my
ĠTe chn
ack ing
x y
S S
Ġ4 2
Ġbu g
ĠUk rain
ĠM ax
ĠJ ones
ĠSh ow
l o
Ġplan et
Ġ7 5
Ġwin ning
Ġf aster
Ġspe ct
Ġbro ken
T R
Ġdef ined
Ġhealth y
Ġcompet ition
htt ps
ĠIs land
ĠF e
Ġannoun ce
ĠC up
ĠInst ead
Ġcl ient
Ġposs ibly
se ction
ock et
l ook
Ġfin ish
Ġcre w
Ġres erv
Ġed itor
Ġh ate
Ġs ale
Ġcontro vers
Ġp ages
w ing
Ġnum er
Ġopp osition
Ġ200 4
Ġref uge
Ġfl ight
Ġap art
ĠL at
A meric
ĠAfric a
Ġapplic ations
ĠPal est
ĠB ur
Ġg ar
ĠSoc ial
Ġup gr
Ġsh ape
Ġspe aking
ans ion
a o
ĠS n
Ġwor ry
ĠBrit ain
P lease
rou d
Ġh un
Ġintrodu ced
Ġd iet
I nd
ĠSec ond
Ġfun ctions
ut s
ĠE ach
ĠJe ff
Ġst ress
Ġaccount s
Ġgu arant
ĠAn n
ed ia
Ġhon est
Ġt ree
ĠAfric an
ĠB ush
} ,
Ġs ch
ĠOn ly
Ġf if
ig an
Ġexerc ise
ĠEx p
Ġscient ists
Ġlegisl ation
ĠW ork
ĠS pr
Ã Ĥ
ĠH uman
Ġ è
Ġsur vey
Ġr ich
ri p
Ġmain tain
Ġfl o
Ġleaders hip
st ream
ĠIslam ic
Ġ 01
ĠCol lege
Ġmag ic
ĠPr ime
Ġfig ures
201 7
ind er
x ual
ĠDe ad
Ġabsolute ly
Ġfour th
Ġpresent ed
resp ond
rib le
Ġal cohol
at o
ĠD E
por ary
Ġgr ab
Ġvar i
Ġqu ant
ĠPh oto
Ġpl us
r ick
ar ks
Ġaltern ative
Ġp il
Ġappro x
th at
Ġobject s
ĠR o
ĠAnd roid
Ġsignificant ly
ĠR oad
k ay
R ead
av or
Ġa cknow
ĠH D
ĠS ing
O r
ĠM ont
Ġun s
pro f
Ġneg oti
ĠAr ch
ik i
Ġte levision
ĠJew ish
Ġcomm ittee
Ġmot or
Ġappear ance
Ġs itting
Ġstri ke
ĠD own
com p
ĠH ist
Ġf old
ac ement
ĠLou is
Ġbel ong
ĠâĢ ¢
Ġm ort
Ġprep ared
Ġ6 4
ĠM aster
Ġind eed
ĠD en
Ġre nt
T A
our ney
ar c
S u
9 7
Ġadv ice
Ġchang ing
Ġlist ed
Ġlaun ched
is ation
ĠP eter
is hes
Ġl ived
ĠM el
ĠSup reme
ĠF ederal
Ġ) ;
ruct ure
Ġset s
Ġphil os
u ous
ĠÂ ł
Ġappl ied
ĠN OT
Ġhous ing
ĠM ount
Ġo dd
Ġsu st
D A
ffic ient
Ġ ?
ol ved
Ġp owers
Ġth r
Ġrem aining
ĠW ater
L C
Ġca uses
ãģ ®
Ġman ner
ad s
Ġsuggest s
Ġend s
stand ing
f ig
ĠD un
id th
Ġg ay
Ġter min
ĠAngel es
M S
Ġscient ific
Ġco al
ap ers
b ar
ĠThom as
Ġsy m
ĠR un
th is
P C
igr ants
Ġmin ute
ĠDist rict
cell ent
Ġle aves
Ġcomple ted
am in
Ġfoc used
Ġmon itor
Ġveh icles
M A
ĠM ass
ĠGr and
Ġaffect ed
itution al
Ġconst ruct
Ġfollow s
Ġt on
re ens
Ġh omes
ĠE xt
ĠLe vel
r ast
ĠI r
Ġel im
Ġlarge ly
ĠJ oe
Ġvot es
all s
Ġbusiness es
ĠFound ation
ĠCent ral
Ġy ards
Ġmaterial s
ul ner
Ġgu ide
Ġclos er
um s
Ġsp orts
ed er
J ust
Ġtax es
8 4
ĠO ld
Ġdec ade
ol a
Ġv ir
Ġdro pped
Ġdel ay
it ect
Ġsec ure
ste in
le vel
Ġtre ated
Ġfil ed
ain e
Ġv an
Ġm ir
Ġcol umn
ict ed
e per
Ġro t
Ġcons ult
Ġent ry
Ġmar ijuana
ĠD ou
Ġapparent ly
ok ing
clus ive
Ġincre ases
an o
Ġspecific ally
Ġte le
ens ions
Ġrelig ion
ab ilities
Ġfr ame
ĠN ote
ĠLe e
Ġhelp ing
Ġed ge
ost on
Ġorgan izations
Ã ĥ
ĠB oth
hip s
Ġbig ger
Ġbo ost
ĠSt and
Ġro w
ul s
ab ase
Ġr id
L et
are n
ra ve
Ġst ret
P D
Ġv ision
Ġwe aring
Ġappre ci
Ġa ward
ĠU se
Ġfact or
w ar
ul ations
) (
Ġg od
Ġter rit
Ġpar am
ast s
8 7
Ġen emies
ĠG ames
F F
Ġacc ident
W ell
ĠMart in
T ER
Ġat h
ĠHe ll
Ġfor g
Ġve ter
ĠMed ic
f ree
Ġst ars
Ġexp ensive
Ġac ad
ra wn
ĠW he
Ġl ock
Ġform at
Ġsold iers
s m
Ġag ent
Ġrespons ibility
or a
ĠS cience
Ġrap id
Ġt ough
ĠJes us
Ġbelie ves
M L
Ġwe ar
le te
Ãĥ ÃĤ
ĠD ri
Ġcomm ission
ĠB ob
O h
ap ed
Ġwar m
ÃĥÃĤ ÃĥÃĤ
Ġ200 3
ort ion
Ġhas n
ust er
Ġun ivers
ĠI ll
Ġk ing
olog ies
9 4
ĠT em
ĠM os
Ġpat ient
ĠMex ico
ce an
ĠDe ath
ĠSand ers
y ou
ĠC ast
ĠComp any
pt y
Ġhappen ing
F P
ĠB attle
Ġb ought
A m
M od
U s
ut ers
ĠC re
ĠTh ose
Ġ4 4
is er
Ġs oul
ĠT op
ĠHar ry
ĠA w
Ġse at
ff ee
Ġrev olution
Ġ( "
ĠD uring
et te
Ġr ing
Ġoff ensive
Ġreturn s
Ġv ideos
Ġdis cl
Ġfam ous
en ced
ĠS ign
ĠR iver
Ġ3 00
P M
ĠB us
ĠC H
Ġcandid ates
ard en
Ġpercent age
Ġvis ual
Ġthan k
Ġtrou ble
ner gy
Ġ200 1
Ġpro ve
ash ion
Ġen h
ĠL ong
U M
Ġconnect ed
Ġposs ibility
O ver
Ġexper t
Ġl ibrary
art s
ĠDirect or
Ġfell ow
9 2
ir ty
Ġd ry
Ġsign s
ĠL ove
Ġqu iet
f oot
Ġp ure
ĠH un
Ġf illed
ph as
ĠE lect
end ment
ĠEx pl
Ġun able
n s
m o
Ġv ast
ob e
Ġident ify
app ing
ĠCarol ina
g ress
Ġpro te
Ġf ish
Ġcircumst ances
raz y
ĠPh ot
Ġb odies
ĠM ur
Ġdevelop ing
ĠA R
Ġexperien ced
Ġsubst ant
ĠBo ard
es ome
Ġdom estic
Ġcomb ined
ĠP ut
Ġchem ical
ĠCh ild
Ġpo ol
ĠC y
Ġe gg
c ons
st ers
Ġh urt
Ġmark ets
Ġconserv ative
Ġsupp orters
Ġag encies
id el
O b
ur b
Ġ4 3
ĠDef ense
y e
ĠA p
du le
Ġtemper ature
Ġconduct ed
ĠCh ief
Ġpull ed
Ġf ol
L ast
ont o
os is
V ER
D es
ĠP an
F irst
Ġadv ance
Ġlic ense
r ors
ĠJ on
Ġimag ine
Ġhe ll
Ġf ixed
Ġinc or
os ite
ĠL og
ick en
] :
Ġsurpr ise
h ab
Ġc raft
ol t
ĠJ ul
Ġd ial
Ġrele vant
Ġent ered
Ġlead s
ĠA D
ĠCle an
Ġpict ures
ess or
Ġal t
Ġpay ing
P er
ĠMark et
Ġupd ates
am ily
ĠT ype
ĠH ome
Ġ5 5
semb ly
rom e
8 3
Ġgreat est
Ġhe ight
Ġhe av
ain ts
Ġlist en
as er
ĠS H
Ġcap able
ac le
Ġpers pect
in ating
Ġoff ering
ry pt
ĠDe velop
ab in
r c
Ġbr ight
al ty
ar row
Ġsupp l
ind ing
ack ed
gy pt
ĠAn other
p g
ĠVirgin ia
ĠL u
Ġpl anned
Ġp it
Ġswe et
T ype
ĠD i
Ġtyp ically
ĠFranc isco
Ġpro spect
ĠD an
Ġte en
re es
Ġsc hed
Ġh ol
Ġsc r
Ġlot s
l ife
Ġnews p
Ġfor get
ĠN one
ĠM iddle
ĠR yan
ed d
Ġse vere
Ġsu it
ll er
9 3
Ġcor respond
Ġexpl os
u ations
Ġfl ag
g ame
r id
Ġpr in
ĠD ata
Ġde ploy
ĠEn ter
su it
gh an
ĠM en
Ġthough ts
Ġmat ters
Ġad apt
ĠA ri
Ġf ill
Ġfor th
Ġs am
Ġ4 1
Ġpay ment
ĠH or
Ġsp ring
du c
Ġl osing
Ġbring ing
F O
al a
Ġdist ribution
he red
b our
ĠIsrael i
om a
Ġcomb ination
Ġpl enty
V E
C an
ĠH aw
Ġper man
ĠSpe cial
Ġto w
Ġsee king
Ġexam ples
Ġclass es
c r
Ġbe er
Ġmov es
ĠI P
ĠK n
Ġpan el
E ven
Ġproper ly
Ġr is
Ġpl ug
Ġestim ated
E very
Ġdef ensive
ag raph
Ġpre gn
Ġinst it
ĠV ict
Ġvol ume
Ġpos itions
Ġl inks
ĠPro gram
ĠWe ek
ag ues
Ġtrans form
k er
ĠC EO
Ġc as
Ġopp onent
Ġtwe et
ĠC ode
Ġsh op
Ġf ly
Ġtal ks
Ġb ag
Ph one
Ġa id
Ġpl ants
Ġ6 5
Ġatt orney
ar ters
qu est
ĠMag ic
Ġbeg ins
Ġmy ster
Ġenvironment al
Ġst orage
N N
Ġm arg
Ġs ke
Ġmet al
ell y
Ġord ered
Ġrem ained
Ġl oved
Ġprom pt
Ġupd ated
Ġexper ts
Ġwalk ing
Ġan cient
Ġperform ed
AT E
Ġne ither
i ency
Ġmanufact ure
ĠP ak
Ġselect ed
Ġm ine
Ġult imately
Ġexpl an
Ġlab el
ĠServ ices
ribut ed
Tr ump
Ġsy n
ĠU lt
S C
Ġme at
Ġg iant
ĠW ars
ĠO N
Ġad m
Ġinter pret
Ġeven ing
Ġev il
ĠB oston
ĠW ild
Ġ Ã
ĠBit coin
ĠAm azon
D r
ĠIn formation
Ġobvious ly
Ġadv anced
Ph oto
ol ar
Ġwe ather
Ġsymb ol
Ġso le
Ġpot entially
ost er
Ġorig inally
m un
3 00
az e
ess ions
Ġde ck
Ġst ood
Ġyou th
ĠB ern
R ep
ĠT est
Ġbas ically
ot ic
Ġinvol ve
ol it
ly n
S ee
Ġair craft
Ġconf irm
E W
Ġmess ages
ĠRich ard
Ġk it
Ġpro hib
Ġv ulner
is ters
Ġexist ence
Ġturn ing
ĠS P
Ġdes ire
Ġfl at
Ġm ent
se ason
ang es
Ġneighbor hood
ĠL ake
AT ION
Ġpoint ed
b ur
Ġinn ov
uc ks
U L
Ġprofess or
Ġexp ressed
A B
ic ious
Ġ200 2
ĠDe v
Ġs ession
Ġb are
s en
Ġdis s
ĠC ath
ĠP ass
ĠP oint
Ġdo ctor
or row
ail ed
ĠR ub
ĠD C
ĠChar l
p erson
Ġwrit er
igh ters
ure au
Ġob lig
Ġrecord ed
Ġbro ke
Ġord ers
il ty
Ġmot ion
in ity
l aw
ad ium
Ġimm igration
Ġcontr ast
Ġb att
Ġex cellent
Ġtechn ical
am i
Ġt un
Ġcl oud
ĠY ear
ge on
Ġcre ation
Ġstr ange
Ġa uth
Ġfor t
b orn
Ġext ent
ĠT oday
ĠCl ub
Ġr ain
Ġs ample
Ġaccept ed
Ġt act
Ġf ired
ĠS on
Ġstand s
Ġb oot
Ġ4 7
Ġstat ements
Ġvers ions
Ġse lling
ound ed
Ġ199 0
Ġwere n
ĠW atch
Ġexper iment
P ost
Ġret ail
ul ed
In st
un te
ãĥ ¼
Ġdep art
Ġb ond
i very
om pl
Ġre action
ĠSyri an
ĠP ac
app ed
ani el
D P
Ġres olution
Ġre act
Ġappro ved
on om
m ond
ĠO ffic
-- -
Ġrepl ace
Ġt ack
Ġsp ort
Ġch ain
Ġemer gency
r ad
ĠPalest in
Ġ4 6
Ġautom atically
Ġrout e
Ġp al
Ġb anks
ĠPar is
ĠMed ia
ro ad
ic ing
i xt
ist ed
Ġg rew
Ġco ord
ĠW here
om in
Ġsub s
ï¿½ ï¿½
ĠÂ ±
Ġcorpor ate
Ġse lection
n oon
ĠRep ort
c s
clud ing
ord ers
anc he
ĠIt s
Ġslow ly
ĠE gypt
ĠA cc
Ġcol le
iqu es
E X
Ġattempt s
ur l
ĠC ross
Ġfind ings
ĠS C
ĠO R
Ġind ex
ens ity
ĠW ay
ĠL and
Ġsh ock
d is
Ġd ynam
Ġc art
m osp
S ince
i est
ĠB oy
Ġst orm
ĠCont in
201 3
he w
il it
Ġess ential
iqu id
O ther
ive red
Ġreason able
A ct
Ġsub sequ
ĠP ack
ĠF ort
Ġconsider ing
Ġun iversity
l og
Ġmar ried
Ġill ust
ĠTr ue
£ ı
Ġnumer ous
rast ructure
Ġserious ly
Ġrefer red
u a
Ġconsist ent
on na
ĠRe al
ru ption
ci ples
Ġfact s
9 1
ot es
er g
The n
Ġacc ompl
N ote
Ġre venue
Ġpass ing
Ġm al
e en
ĠY et
Ġg ather
ter day
ew ork
ĠA uthor
P e
Ġopt im
Ġr ub
Ġè £ı
Ġun known
st one
Ġun ion
ol ve
Ġopportun ities
Ġbrow ser
ĠW al
ĠC ost
Ġreport ing
st s
p et
Ġs and
Ġsudden ly
Ġsurpr ising
ĠV R
Ġsomew hat
ĠB as
ult ure
iz z
ĠC D
Ġchalleng es
Ġsett ings
Ġexperien ces
ĠF ull
Ġcan n
Ġrece iving
ES T
Ġj oint
Ġcult ural
Ġa st
8 2
as tern
ce ived
ĠC ru
Ġb ull
p ired
am m
Ġfac ing
p ower
Ġb oss
ĠH ol
Ġinst r
Ġincreasing ly
Ġsh ift
Ġstre ets
ĠWilliam s
ab b
Ġl ie
Ġl augh
ĠC a
P L
Ġadult s
Ġcustom er
Ġob tained
Ġsupport ing
ht ml
f ire
Ġdetail ed
Ġpick ed
ĠR ight
ld er
E E
st ood
ĠK im
Ġw ire
Ġs ight
Ġdevelop ers
Ġpers ons
Ġs ad
Ġc up
Ġwar ning
Ġboy s
l ong
Ġb ird
f o
Ġw al
Ġobserv ed
Ġz one
iven ess
Ġch annel
c ript
Ġref used
ĠAg ain
Ġsu c
Ġspokes man
ĠRe f
r ite
ou ston
ãĥ ³
ĠS her
Ġact s
ĠN ame
Ġstrugg le
ar ry
omet imes
Ġdisc rim
H T
Ġcateg ory
Ġreal ize
Ġemploy ee
ĠAf ghan
en ger
Ġgun s
ĠSte ve
ĠM ot
ĠO l
ok ed
Ġth ick
Ġfair ly
ill y
Ġsur ve
ĠM at
we ight
â Ķ
Ġtro ops
Ġag ents
Ġbatter y
Ġmot iv
Ã ¡
S ec
d en
o very
L S
Ġfl u
Ġconf ident
ĠO per
Ġem pty
Ġp hen
Ġse ctor
Ġexc ited
Ġrem ote
ap h
o en
Ġdestroy ed
Ġmor al
ĠH P
ĠR on
Ġd ress
ĠB at
Ġl it
ĠM S
Ġa f
H L
r um
is ms
Ġshould n
Ġsym pt
ĠTor onto
het ic
Ġcar bon
Ġinstall ed
Ġviol ent
Ġsol ar
j a
Ġpract ices
Ġr ide
ĠP enn
Ġimpro ved
Ġaud io
Ġbehav i
ĠP S
Ġe ating
D ata
ĠRe view
p ass
cl aim
u ated
ang ers
c hen
Ġproper ties
Ġany where
An other
Ġbl ow
ĠJack son
Ġp roud
Ġplan e
l ines
Ġsqu are
Ġpro of
ans as
Ġtalk ed
m akers
Ġs ister
Ġhold s
Ġres ident
Ġ= =
Ġresist ance
Ġspl it
Ġpro secut
Ġconf idence
res ents
Ġcut s
Ġexcept ion
Ġz ero
Get ty
Ġcop yright
Ġtot ally
orm al
ific ations
ĠAustral ian
Ġs ick
Ġ1 50
Ġhouse hold
Ġfe es
Ġdri vers
og en
ĠN Y
Ġnecess arily
Ġregul ations
ear ing
s l
Ġperspect ive
c are
ic ial
H is
Ġesc ape
Ġsurpr ised
ĠV an
ur rent
Ġv ac
8 1
ĠTh us
Ġem phas
ĠCh ampions
ĠI ce
Ġn arr
Ġhead s
Ġca using
b el
f ortunately
ĠM a
Ġtarg ets
ci pl
Ġafter noon
Ġadd s
ĠMay be
ĠF our
ess ed
ple te
Ġus ual
ch o
ing u
Ġwith d
ĠE nergy
ĠE conom
O O
Ġart icles
Ġinj ured
Ġman age
Ġexpl ains
Ġdi agn
R ec
at ures
Ġlink ed
Ġdiscuss ed
Ġexpl o
Ġocc asion
ath an
Ġopp osite
Ġfac es
Ġden ied
ĠK night
Ġn ut
Ġapprox imately
Ġdisapp oint
onym ous
ĠB est
ĠL o
ĠH y
ĠA ff
Ġvot ing
an while
ĠII I
Ġinstit utions
ag ram
ĠD aily
Ġdr ag
Ġnear by
Ġgu ilty
Ġcon ver
P re
s hip
Ġre ward
Ġphilos oph
ĠS S
u gh
Ġapp s
f riend
Ġu pper
Ġad vert
Ġs now
Ġfr ust
Ġour selves
F r
ĠD ie
amp ion
Ġdis miss
Ġc ere
Ġsign al
f rom
Ġ ).
Ġ5 2
Ġcr imes
it ors
est ival
use um
Ġcoun cil
ĠS aud
M ay
ĠG un
ic ian
et her
Ġsu fficient
ĠH en
so le
Ġhistor ical
ĠF ar
ĠT urn
Ġp in
Ġsuc ceed
m at
ly mp
Ġtrad ition
ĠO k
Ġc ro
Ġdesc ription
al le
Ġsk y
T e
Ġwide ly
Ġw ave
Ġdefin ition
ĠJew s
Ġcy cle
Ġref ere
Ġbr ings
us al
Ġal ive
Ġfrequ ently
Ġint ention
ĠCont rol
l v
y stem
Ġpriv acy
g ent
ren ce
ĠQu est
ĠChrist mas
Ġr ail
Ġco oper
Ġtest ed
ĠC apt
as ks
Ġcomfort able
Ġdel ivered
sc ape
Ġdep th
ĠG OP
Ġwrit es
Ġass ets
Ġsa v
im ents
Ġtrans ition
Ġart ist
ĠL ook
Ġl ob
Ġcomp onents
ar ity
Ġwalk ed
Ġro ot
Ġparticip ants
Ġnot iced
Ġres c
Ġn av
ĠAd minist
d a
ut ral
pl ate
Ġimport ance
Ġass ert
ious ly
c ription
Ġinj uries
ĠChe ck
Ġregist ered
Ġint ent
Ġmiss ed
ograph ic
Ġsent ence
oun ter
Ġassist ance
ev in
Ġdat abase
Ġbuild ings
Ġclass ic
Ġth inks
ĠOh io
P r
ug g
Ġfe e
p an
Ġeffect ively
Ġfac ility
Ġbe ar
Ġch apter
Ġdog s
ĠCol umb
Ġl atter
it ial
Ġad mitted
T V
ĠGe org
Ġpost s
\ \
Ġlawy er
Ġequ ival
Ġm and
Ġcontro lled
ĠW alk
ĠAnd rew
Ġmen u
am ental
Ġprotect ed
v a
Ġadminist r
or al
Ġre in
ĠS ar
Ġamount s
Ġn ative
ĠM oon
Ġrep resents
Ġab andon
Ġcarry ing
Ġt ank
m ary
Ġdecl ared
T ube
Ġh at
Ġpun ish
el lect
m es
Ġun iverse
ĠR od
ph y
Ġinf rastructure
Ġ5 1
Ġopp osed
ow nt
c a
ĠM ake
Ġhard ware
Ġco ffee
R el
b al
w orld
ĠS af
ĠSe a
in als
Ġown ed
Ġh all
ers ion
Ġdescrib e
ĠP ot
Ġport ion
Ġat mosp
Ġgovern ments
Ġdep ending
Ġoff ense
Ġtr ick
aw a
ĠL ine
ĠV is
ĠH ard
ĠOr ig
ĠCl ick
Ġdes k
ĠVal ley
ĠS ov
Ġmov ies
Ġrem ark
Ġm ail
Ġcons cious
Ġrul ing
ĠR ights
Ġmed ic
he nt
ĠW omen
> <
Ġrepl aced
ĠP rem
ĠTh anks
Ġre new
ĠB all
if orm
Ġsh ots
C omm
Ġar med
Ġconst ant
Ġt aste
Ġreal ized
Ġbu ff
Ġm o
Ġeffic ient
M ost
or ation
if ies
Ġcommun ication
Ġfl ood
Ġconsequ ences
Ġany way
ig g
ĠG M
ĠTh ank
Ġ iron
Ġev olution
ĠC op
tw itter
Ġ9 5
Ġrelationship s
ad el
ĠYou ng
Ġpropos al
ay ers
uild ing
ĠH ot
OR E
c os
Ġcoll abor
P G
ax y
Ġknow ing
Ġsupport s
ow ed
Ġcontrol s
Ġmere ly
um er
Ġath let
Ġf ashion
p ath
Ġg ift
Ġer a
AN D
Ġkind s
ĠKore an
Ġleg it
ul ous
Ġess entially
Ġthe rap
n ic
Ġsuff ered
Ġh ur
Ġprom ise
Ġex cess
Ġover w
Ġpr ime
ĠH ouston
er ry
ĠM s
R S
201 2
Ġst ores
ĠO lymp
Ġj ourney
Al though
S ub
ĠE duc
ĠCh apter
Ġrequest s
Ġconsum ers
Ġt iny
Ġis ol
ĠF air
b a
ĠY OU
Ġcr ash
ce ler
Ġemot ional
Ġgood s
Ġelect ed
Ġmod er
ĠLin ux
Ġbl ocks
Ġis land
ĠSoc iety
Ġelect ions
Ġbroad cast
Ġche ap
Ġn ations
Ġse asons
4 00
Ġwas te
ĠS at
Ġfield s
em ploy
Ġprof ile
Ġauth ors
AL L
ĠG ra
w est
ĠT y
Ġdeath s
Ġv acc
Ġfor med
Ġd u
Ġon going
ĠMuslim s
el f
ig ure
Ġass ume
ĠUkrain e
w ater
Ġco ast
Ġvot ed
g or
ĠA S
ĠMich igan
az a
ĠAr m
i ro
Ġf lex
as ters
' '
Ġwel come
ar l
Ġloc ations
ig ation
ĠF il
Ġbu ying
Ġarch itect
Ġhard er
ĠC ub
Ġinter face
Ġrestaur ant
Ġdisco ver
Ġex ceed
Ġfav our
ger y
Ġd uty
Ġp itch
ad or
ĠM ach
b oy
Ġrespond ed
Ġext ended
her s
M any
ra id
if er
ĠIn s
S er
Ġmed ium
s he
ĠS ports
Ġmag azine
ut ation
Ġlim its
ĠG all
Ġex ternal
raz il
Ġyoung er
t le
Ġrem ind
ĠC ON
Ġimmedi ate
Ġh idden
Ġvol unte
Ġsim pl
od cast
Ġph ase
d r
Ġpl ot
Ġexp osure
R I
og rap
v in
an ish
ĠAc ad
ĠEng ine
Ġexp ansion
ĠP ay
Y our
Ġpus hed
ĠE ll
ĠHe ad
Ġmarket ing
ĠA C
k et
Ġh its
Ġg ro
ĠA ge
ĠSc ot
] [
Ġst im
Ġi Phone
Ī Ĵ
Ġn arrow
ĠGet ty
ĠTur key
Ġperfect ly
Ġen able
ut ch
Ġprec ise
Ġreg ime
Ġsh if
Ġcomp ens
g un
d iv
Ġch osen
ĠK en
An y
Ġtre es
Ġrecomm ended
ĠR en
u able
ĠH T
F ollow
E G
ĠH and
ĠK enn
Ġarg uments
Ġex ists
Ġb ike
ĠCons erv
Ġbre aking
ĠG ar
Ġc razy
Ġvirt ual
ay lor
ix el
Ġ19 80
Ġper mission
ĠSer ies
Ġconsum er
Ġclose ly
c alled
Ġ5 4
Ġhop es
Ġar ray
ĠW in
ĠLab our
Ġsp ons
ĠI re
Ġp ow
Ġread ers
Ġemploy ment
Ġcreat ure
Ġresult ing
Ġaccur ate
Ġmom ents
Ġarg ued
Ġp ed
D uring
Ġ5 3
ĠT al
Ġs ought
Ġsuff ering
Ġ icon
le e
Ġ( $
al ian
Â °
Ġp ra
Ġbon us
( "
k o
Ġact ing
D E
f all
Ġcompar ison
Ġsm ooth
ĠN AS
u pp
ĠJose ph
ep ing
ĠT ake
ĠM id
Ġs ending
f ast
ĠF all
Ġdeal ing
us er
ĠOr gan
C o
Ġatt ached
Ġse es
% .
Ġtyp ical
AR T
Ġfind s
ĠAs ia
um in
ĠC ore
ĠE nt
in ent
u ce
ĠBl ood
ĠN ever
Ġem ails
Ġhigh light
Ġconf ront
at us
ut ed
Ġun us
Ġtop ic
ĠAd am
Ġb le
at i
Ġunder stood
S et
st ruct
T P
Ġm ob
a a
ĠSt art
pect ed
se ll
Ġded icated
ĠC A
u an
Ġsong s
esc ription
Ġte ch
Ġr ape
Ġas ide
Ġgr ant
Ġ5 6
s ub
Ġarg ue
Ġcont aining
Ġsche dule
Ġliber al
Ġpublic ly
Ġheav ily
ĠU t
in er
ĠS ection
ĠC are
we et
l s
D is
âĶ Ģ
ĠF ollow
B ack
ĠI T
Ġb es
j i
ĠH it
est ed
Ġevery body
ĠSw ed
Ġfem in
Ġfac ilities
Ġcon ven
C omp
ĠO S
c ore
Ġan x
Ġdiv ision
ĠC am
ĠSt an
m ates
Ġexpl ore
pl om
Ġsh ares
pl oad
an es
Ġide al
et ers
ĠB ase
Ġpl astic
Ġdist inct
ĠNet work
ĠSe attle
Ġtrad ing
ens us
int end
Ġex hib
Ġinit ially
ĠF ood
Ġthous and
ĠBus iness
act er
Ġpar agraph
Ġrough ly
Ġw ww
Ġcreat ive
ĠCon f
Ġconsum ption
Ġfil ms
ag an
Ġob tain
Ġt all
Ġt or
Ġacknow led
Ġg rown
al o
K E
Ġ4 00
end ers
t aining
U G
Ġsu icide
Ġwat ched
ĠL ist
al i
re hens
Ġsurround ing
Ġp ip
Ġf lying
ĠJ ava
ord an
Ġserv ing
in ations
p ost
Ġsh o
A v
Ġj ail
z y
Ġ199 9
Ġ< /
Ġliter ally
ĠS ir
Ġexp osed
Ġl ies
st ar
Ġb at
Ġear ned
ĠD ig
Ġspec ified
ĠSe ason
Ġdeg rees
Don ald
Ġcent re
Ġsh aring
Ġwin ter
ĠC O
C he
Ġ Î
M P
Ġun w
Ġfew er
ĠM ir
Ġsomew here
ĠK ey
Ġattack ed
ĠK ir
Ġdom ain
Ġstrong er
Ġ9 9
Ġpen alty
I d
Sc ript
Ġdecl ined
Ġne ck
Ġfra ud
Ġcur rency
Ġr ising
R C
âĢ¦ âĢ¦
H z
Ġt ab
Ġtal ent
n am
ĠN BA
Ġvill age
Ġleg s
ĠN ext
E d
Ġac id
Ġhy d
8 00
Ġinvol ving
ĠIm age
ĠBe fore
F l
Ġyes terday
S ource
Ġterror ist
Ġsu p
Ġsy nt
ĠSaud i
Ġw est
Ġr u
b urg
Ġvis ible
Ġstru ck
r ison
Ġaw esome
Ġd rawn
Ġansw ers
ĠG irl
ĠR am
Ġthreat s
Ġdef eat
os it
Ġv ent
atur ally
Americ an
end a
ĠH oly
Ġr um
% ,
c ase
ĠHist ory
ĠYou Tube
Ġsit uations
ĠD NA
S te
Ġsa ved
It em
Ġrec ip
olog ist
Ġfac ed
Ġel ig
O nce
ĠL i
u h
Ġmist ake
ĠDiv ision
ĠB ell
Ġsympt oms
Â ®
Ġdom in
Ġfall ing
Ġend ing
as hes
Ġmat ches
ĠOn line
Ġexplan ation
D ef
red it
Ġany more
ĠT otal
ĠF OR
us hed
Ġlet ters
Ġris ks
ĠO K
Ġreported ly
: \
Ġpl ate
Ġsubject s
Ġattempt ed
if ier
ian a
Ġunlike ly
ĠTh ough
um a
ĠIn vest
ĠPr in
ic an
ĠD ar
ĠColor ado
au g
Ġve get
a os
ri a
Ġshe l
Ġmark ed
Ġ( )
Ġsp r
p o
ĠL ink
Ġdef e
ĠJ r
Ġthem e
Ġpass ion
ĠP en
Ġinf o
iz er
Ġsh it
ĠC ivil
ap se
c re
Ġpo ly
Ġcomp onent
ĠChar les
ĠIre land
ĠPro v
Ġdo ctors
Ġgr anted
Ġpain t
Ġhon or
Ġsm oke
Ġpay ments
Ġprim arily
ĠKing dom
r ich
ate ll
Ġde als
Ġsched uled
Ġfund amental
Ġprote in
Ġnewsp aper
Ġcl ients
yth on
ĠD ate
h us
Ġfeed back
Ġstret ch
Ġc ock
Ġhot el
ĠQue en
Ġsu gar
Ġj u
Ġmil k
Ġappro val
ĠL ive
Ġequival ent
ef ully
Ġins ert
z ona
Ġext ension
d ri
J ohn
Ġacc omp
S m
ĠF und
Ġconst antly
Ġ` `
Ġgener ated
ĠA ction
ĠP sych
ĠT ri
Ġrecogn ize
Ġv ary
ph a
ĠR a
d f
et ch
ĠSov iet
Tw o
Ġpattern s
Ġprof ession
an ing
T ime
ĠL im
Ġcol ors
ĠA z
ĠT R
Ġinf ect
Ġphen omen
Ġshe ll
Al so
Ġput s
Ġdel ivery
Ġbro wn
Ġprocess ing
Ġlight s
ess age
ĠBro ok
ĠA ud
l ation
Ġindust rial
L ike
ĠB razil
rou s
ES S
ĠL uc
Ġsome how
Ġ8 5
Ġpro port
Ġpolit icians
Ġindic ate
Ġh ole
Ġtechn iques
Ġcompet itive
Ġph r
Ġv o
ist ent
ĠD ream
Ġcamp us
Ġaspect s
Ġhelp ful
Ġsh ield
or se
Ġtrig ger
m al
Ġ5 8
Ġt ort
Ġperson ally
Ġt ag
Ġkeep s
ĠV ideo
Ġben ch
Ġg ap
a ire
Ġe ast
Ġrec overy
per ial
Ġprof it
ĠM ic
Ġ5 7
Ġcol on
Ġstrong ly
st yle
Ġalleg ations
h an
Ġrep orters
j o
r ine
arg et
and al
Ġ0 3
Ġfl ash
tr ans
Ġstr ict
Ġpark ing
ĠPak istan
Ġl i
Ġwe ird
ĠE ric
Ġreg ions
ĠJ un
Ġint ellect
ĠW H
od ing
rib utes
up id
ĠT it
Ġf inger
or ia
Ġe lev
ĠF ield
Ġcon clusion
; ;
Ġfeel ings
Ġext ensive
Ġm ixed
Ġne uro
v y
Ġhar ass
ĠC irc
ou ch
Ġterrit ory
Ġsuccess fully
M ar
Ġing red
Ġoverw hel
Ġl ayer
V iew
Ġall ies
ill ance
ĠTh ree
Ġb unch
Ġnorm ally
Ġnet works
Ġsac r
ĠC IA
b les
Ġch ose
Ġopp onents
Ġregard less
Ġfr anch
Ġpre f
ĠP o
Ġbr idge
ann a
ĠSil ver
Ġw age
p age
ri or
Ġrad ical
ĠL ittle
Ġman ip
Ġsecret ary
Ġg ang
D R
F A
Ġdec ent
ĠSp irit
Ġun cle
ĠDevelop ment
Ġinvest ors
Ġwall s
Ġpub lish
Ġgener ate
iss ions
c ar
Ġprom ote
Ġcut ting
Ġche st
Ġdrink ing
Ġcollect ed
Ġ7 2
Ġhop ing
Ġem br
gor ith
Ġwar ned
Ġinstruct ions
O G
ĠD id
ĠAg ency
Ġg ear
Ġcritic ism
ĠF urther
Ġut il
ann y
R ed
Ġcoun sel
ĠAs ian
Ġredu ction
p ool
Ġteach ing
Ġdeep ly
i y
Ġestim ates
Ġcho ices
Ġperman ent
in em
ke l
Ġf asc
p se
f ile
ĠL ow
ĠP erson
Ġt ournament
st al
Ġm el
U ST
ĠR ay
az i
V al
Ġcont ained
ĠH olly
Ġw ake
Ġreve al
Ġprocess es
ĠIS IS
Ġ0 9
Ġbl ind
Ġste el
ĠB ad
Ġcare fully
app y
ro it
Ġg aming
Ġhous es
ĠC oll
Ġtr uck
er m
Ġsc ored
Ġocc as
ret urn
b ound
v ar
Ġsh arp
Ġaf raid
ĠE X
am ber
c ific
Ġsche me
N C
ĠPol it
Ġdecl ine
Ġ199 8
Ġpus hing
Ġposs ession
Ġpriv ile
Ġteacher s
Ġy ield
H A
ĠDav is
it led
#### ####
Ġr ig
ĠD aniel
ac on
Ġh ide
ut en
Ġcolle agues
Ġprin ciples
Ġl oud
Ġs in
ĠDem on
Ġst one
Ġ0 2
Ġt aught
Ġter rible
Ġst uck
ĠPol icy
te en
Ġimplement ation
ĠB BC
ĠAP I
Ġwhe el
all as
Ġch ampions
ol ars
play er
Ġrepeated ly
ĠSt ill
Ġlik es
ast y
es ter
ĠCath olic
R L
Ġb ath
Ġno ise
t itle
Ġn orthern
P art
Ġmag n
Ġf ab
ĠAs h
Ġdis pl
Ġtick et
Ġm urd
Ġalong side
ĠMus ic
Ġr iver
ĠSte el
ĠC L
ĠPl ayer
ĠM ult
ow ing
re p
s ize
Ġt ur
ĠGeorg ia
isc al
ra ction
Ġc able
Ġ5 9
Ġw ins
Ġup coming
Ġsurv ive
Ġins pired
ĠEduc ation
Ġstat istics
ĠF oot
iam i
Ġy ellow
ĠP age
. -
ĠH as
Ġur ban
Ġa x
es sel
\ "
Ġquarter back
Ġreg ister
ĠLab or
Ġab ilities
ĠF amily
Ġvar iable
ĠPr ice
Ġcont em
Ġth in
ĠE qu
d ata
Ġg otten
Ġconst it
Ġas ks
Ġt ail
Ġexc iting
ĠE ffect
ĠSp anish
Ġencour age
ins on
ĠA h
Ġcommit ment
C S
Ġr ally
Ġ: :
Ġsubs id
Ġsp in
Ġcapt ured
201 8
Ġinn oc
Ġalleged ly
ĠC ome
Ġart ists
ĠN umber
Ġelect ronic
Ġreg ional
ap es
Ġw ra
Ġmy th
pr ise
ĠM iller
ĠC reat
ĠEp isode
b ell
Ġdirect ed
Ġext ract
Ġs orry
Ġv ice
ag ger
ĠSu pport
Ġ6 6
ĠI ron
Ġwonder ful
Ġg ra
N et
ion e
E ng
Ġsh ips
ik es
ĠK evin
it ar
Ġactiv ists
tr ue
ĠAri zona
ent h
ĠDes pite
ĠS E
Ġha bit
ern el
Ġin qu
Ġab ortion
Ġv oid
Ġexpl icit
Ġeng aged
Ġang ry
Ġr ating
Ġfr ag
b ro
ick ing
d ev
Ġwor ried
Ġob ser
Ġap artment
ĠG T
Ġest ate
ĠConst itution
em on
ĠS now
Ġcount y
Ġdis ag
ĠStep hen
Ġimm igrants
w ind
ĠN ations
Ġfol ks
O ut
Ġg all
Ġtarget ed
Ġst ead
ĠB on
ĠL ib
Ġinform ed
Ġ12 0
ch ain
idel ines
or ough
Ġdri ven
Ġregular ly
Ġbas ket
Ġprinc iple
oc ument
Ġst un
ib ilities
ĠRom an
ĠAb out
Ġal ert
Ġdemocr acy
Ġrepresent ed
H S
c ers
p arent
Ar t
p ack
Ġdi plom
re ts
ĠN O
Ġcapt ure
ĠAd v
Ħ ¢
Ġannounce ment
ĠL ear
Ġh ook
Ġpur s
ĠS uch
ĠC amer
Ġrefuge es
ĠV e
P ol
Ġrecogn ized
l ib
Ġhad n
A ss
Ġpil ot
us hing
Ġreturn ing
Ġtra il
ĠSt one
Ġrout ine
Ġcour ts
Ġdes per
Ġfriend ly
ĠIt aly
Ġpl ed
Ġbreat h
Ġstud io
N S
Ġimp ressive
ĠAfghan istan
Ġf ing
Ġd ownt
ink ing
ĠR og
i ary
col or
se x
ar on
Ġf ault
ĠN ick
D own
ĠR ose
ĠS outhern
X X
is odes
L ist
6 00
Ġout come
er r
Ġelse where
Ġret ire
Ġp ounds
ĠGl obal
Pe ople
Ġcommun ications
Ġlo an
Ġrat io
ĠEm pire
Ġg onna
Ġinv ent
D F
Ġ19 70
ĠComm on
p at
Ġprom ised
Ġd inner
ĠH om
Ġcreat es
Ġoper ate
ver ty
ĠJ ordan
et ime
Ġsust ain
R eg
Ġincred ible
im a
Ġwar rant
Ġm m
A tt
Ġlaw suit
Ġreview s
it ure
ĠS ource
l ights
ĠF ord
Ġ6 3
g roup
st ore
Ġfeat ured
Ġfore ver
Ġpo verty
ĠP op
ĠC NN
az z
ab is
ach ing
Ġl aid
ĠSu pp
Ġfil ter
en a
ĠCommun ity
Ġcreat ures
u ction
ĠR oyal
Ġassoci ation
ĠCon nect
ĠBr ad
âĸ Ī
l ers
the re
ĠG i
Ġval uable
AC K
ĠT aylor
Ġl iquid
ĠAtt orney
ĠCar l
ĠF inal
ag a
ĠWil son
B ecause
ĠProf essor
ak a
Ġincred ibly
r ance
! )
R ef
s k
Ġsol utions
Ġatmosp here
Ġbl ame
um es
ĠN ob
C A
um ps
r ical
ĠPut in
ĠD est
or ic
ĠP A
Ġrespect ively
w an
Ġfif th
â Ħ¢
ĠC ry
Ġgovern or
res ident
Ġpurch ased
Ġh ack
Ġint ense
ob s
Ġorig in
Ġdef ine
Ġcare ful
** *
Ġshould er
Cl ick
Ġt ied
Ġdest ruction
ou red
Ġno body
Ġh o
ĠEx per
Ġt ip
" ;
Ġtechn ique
Ġj ur
ĠP ok
b ow
Ġleg end
Ġacc ord
Ġbus y
ĠInt el
Ġh ang
ak i
. ]
âĢĶâĢĶ âĢĶâĢĶ
Ġsur gery
Ġrep rodu
Ġun iform
Ġscen es
c ode
Ġ6 2
l isher
ĠH ave
ph ia
Ġcry pt
Ġrec on
Ġsc ream
Ġadop ted
Ġsc ores
N e
ĠIt alian
in cluding
B O
Ġindic ated
Ġent ertain
G u
T ext
i el
Ġtw enty
Ġeng age
off s
ĠPac ific
Ġsm ile
Ġperson nel
Ġto ler
Ġdo ors
Ġt one
Ġmach ines
Ġent ering
ten ance
C O
ĠJer sey
Ġfore st
Ġhor se
Ġcompl aint
ĠSpr ing
y o
ĠPl us
ed ing
ĠRet urn
qu arters
ial s
c ow
Ġacad emic
Ġf ruit
Ġ199 6
og ether
Ġw ine
Ġpur su
ĠSte ven
Ġlic ens
Wh o
Ġclot hes
re ction
Ġsqu ad
Ġst able
Ġr aw
z ens
St ar
ut ies
anc er
Ġke ys
ĠM u
Ġcompl icated
ig er
ĠTe xt
Ġabs or
Ġ6 8
Ġfun ny
Ġrel ief
ĠL ew
ĠC ook
Ġch art
Ġdraw ing
G E
Ġmod ule
ĠB ull
I LL
Ġs alt
0000 0000
il le
Ġres ource
aw ay
adel phia
ĠB ru
Ġ6 7
Ġsome body
Ġparticip ate
Ġro se
we red
Ġmus cle
Ġcons ent
Ġcontin uing
ĠGuard ian
ĠOr der
reg on
Ġre ar
Ġprov ision
Ġlik ed
ri ent
Ġb ra
Tr ans
Ġmeet ings
Ġto x
Ġcon vent
Ġaut o
Ġrec ording
ĠSo ft
00 1
ĠR oll
Ġprogram ming
Ġp ic
Ġprov ed
Ġst ab
ĠA st
Ġca ption
ul ating
ĠAtt ack
Ġnew ly
Ġ199 7
f r
Ġdis cipl
ĠGree k
Ġed ition
ĠDo es
ĠB ox
if le
ack et
Ġpass es
Ġgu est
Ġac celer
it als
U D
Ġaut hent
ĠR est
ov al
t a
u ine
Ġarm or
ĠT own
Ġcomp at
Ġinc hes
Des pite
Ġass ign
he rent
Ġprep are
ĠM eg
oc key
Ġdep ends
Ġtrack s
w atch
Ġl ists
ĠN orthern
Ġal ter
re c
ĠE astern
Ġcond em
Ġevery where
? '
Ġaff ili
Ġf ought
": {"
Ġm ac
it arian
Ġsc ope
ĠA L
aw s
ar ms
Ġqu e
Ġenjoy ed
nes ota
Ġagg ressive
ĠSt ory
ĠI V
Ġrec ipe
Ġrare ly
ĠMed ical
val ue
ang el
ay ing
omet hing
Ġsub section
Ġs outhern
Ġfrequ ency
re te
roll ed
ult s
ĠN ic
Ġbeh alf
Ġsequ ence
ab et
Ġcontrovers ial
Ġcomp rom
Ġwork er
Ġmain ly
Ġal gorith
ĠM ajor
or ce
g ender
Ġorgan ized
Ġf ake
Ġconclud ed
ĠE D
ĠEx ec
r age
Ġch ances
ber ry
ĠTr ad
Ġconfig uration
Ġwithd raw
Ġf ro
ud es
ĠBro ther
ĠB rian
Ġtri es
Ġsam ples
Ġb id
ĠGold en
Ġphot ograph
if est
ĠD O
ĠPar liament
******** ********
R em
Ġcont est
Ġsign ing
p x
ĠZ eal
âĶĢ âĶĢ
E ar
Ġex it
Be fore
ĠCor por
n ull
mon th
Ġrac ial
ott ed
ĠV eg
ĠRe uters
Ġsw ord
ps on
ĠRom ney
a ed
Ġt rib
Ġin ner
Ġprot ocol
ĠB i
ĠM iami
ever al
p ress
Ġsh ipping
ĠAm endment
ĠHow ard
con nect
ĠD isc
ĠJ ac
iam ond
ĠThere fore
s es
ĠPrin cess
ĠUS B
ĠAn th
Ġsurve illance
Ġap olog
Ġ6 1
ow a
Ġf ulf
j s
Ġl uck
ust ed
ĠÂ §
n i
Ġant icip
em an
Ġwin ner
Ġsil ver
ll a
ic ity
Ġunus ual
Ġcr ack
Ġt ies
e z
Ġpract ical
Ġprov ince
ĠPl ace
Ġprior ity
IC E
Ġdescrib es
Ġbr anch
F orm
ask a
miss ions
b i
Ġp orn
ĠTur k
Ġent hus
Ġf ighters
Ġ0 8
ĠDet roit
Ġfound ation
av id
A re
Ġjud gment
cl ing
Ġsol ve
ĠDes ign
W here
hes is
ĠT ro
a fter
Ġne utral
ĠPalestin ian
ĠHolly wood
Ġadv is
ĠN on
y es
ol is
Ġrep utation
Ġsm ell
Ġb read
ĠB ul
ĠBe ach
Ġclaim ing
Ġgen etic
Ġtechn ologies
Ġupgr ade
row s
Ġdevelop er
ĠJ osh
ĠDis ney
erv ed
ip al
Ġun ex
Ġbare ly
t hen
ĠP ub
Ġill ness
et ary
ĠB al
Ġp atch
Ġbut t
Ġst upid
ĠD og
ĠD allas
f ront
ie ce
Ġprot ests
Ġch at
oen ix
Ġw ing
Ġpar liament
Ġ7 7
ose xual
Ġre nder
pt ions
ĠCo ast
os a
ĠG reg
h op
ĠMan agement
Ġbit coin
Ġrec over
Ġincor por
or ne
ĠUs ing
Ġpre ced
Ġthreat ened
Ġspirit ual
ĠE vent
ĠF red
Ġadvert ising
Ġimprove ments
ĠC ustom
Ġer rors
Ġsens itive
ĠN avy
Ġcre am
L ook
Ġex clusive
Ġcomp rehens
Ġde leg
Ġcon ce
Ġrem em
Ġstruct ures
Ġst ored
N D
Ġ1 000
U P
ĠB udd
A F
w oman
ĠAcad emy
ð Ł
se a
Ġtem porary
Ab out
es ters
Ġtick ets
Ġposs ess
in ch
o z
Ġl a
Ġcontract s
Ġun p
Ġc ig
ĠK at
ult ural
as m
Ġmount ain
ĠCapt ain
St ep
m aking
ĠSp ain
Ġequ ally
Ġl ands
at ers
Ġreject ed
er a
im m
ri x
C D
Ġtrans action
g ener
less ly
Ġ| |
Ġc os
ĠHen ry
Ġprov isions
Ġg ained
Ġdirect ory
Ġra ising
ĠS ep
ol en
ond er
Ġcon sole
in st
Ġb om
Ġunc ertain
1 50
ock ing
Ġmeas ured
Ġpl ain
Ġse ats
Ġd ict
S L
af e
Ġest imate
iz on
at hered
Ġcontribut ed
Ġep isodes
omm od
G r
AN T
Ġ6 9
G ener
Ġ2 50
vious ly
rog en
Ġterror ism
Ġmove ments
ent le
oun ce
ĠS oul
Ġpre v
ĠT able
act s
ri ors
t ab
Ġsuff er
Ġn erv
Ġmain stream
ĠW olf
Ġfranch ise
b at
Ġdem ands
Ġag enda
Ġdo zen
Ġclin ical
iz ard
ĠO p
t d
Ġvis ited
ĠPer haps
Ġact or
Ġde lic
Ġcont ribute
Ġin ject
ĠE s
ac co
Ġlist ening
Ġcon gress
epend ent
Ġprem ium
Ġ7 6
ĠIr ish
Ġass igned
ĠPh ys
Ġworld wide
Ġnarr ative
ot ype
m ont
b ase
ĠB owl
ĠAdminist ration
Ġrel ation
ĠE V
C P
Ġco vers
Ġ7 8
Ġcert ific
Ġgr ass
Ġ0 4
pir acy
ir a
Ġengine ering
ĠM ars
Ġun employ
ĠFore ign
st ract
Ġv en
Ġst eal
Ġrepl ied
Ġult imate
Ġtit les
d ated
Ġj oy
a us
Ġhy per
ak u
Ġoffic ially
ĠPro duct
Ġdifficult y
per or
Ġresult ed
rib ed
l ink
wh o
~~ ~~
ĠSpe ed
ĠV iet
W ind
ĠBar ack
Ġrestrict ions
ĠSh are
Ġ199 5
ition ally
Ġbeaut y
op t
Ġm aps
ĠC R
ĠN ation
ĠCru z
W ill
Ġelectric ity
Ġor g
Ġb urd
Ġviol ation
Ġus age
Ġper mit
ĠCh ron
ĠF ant
Ġn aturally
Ġ0 7
Ġth rown
ĠAw oken
Ġal ien
ĠHer o
ĠK ent
ĠR ick
ri ke
Ġp ace
}, {"
G L
Ġpo ison
ĠT ower
Ġform al
al ysis
Ġgen uine
Ġk il
a ver
Ġproced ure
ĠPro p
intend o
ĠM ain
as ant
Ġtr ained
G ame
ĠL oad
ĠM A
Ġcru cial
Ġle ts
ĠF R
Ġch ampion
1 01
ĠCon ference
Ġwrit ers
Ġconnect ions
Ġo kay
ir ms
ĠR and
Ġenc ounter
ĠB uff
Ġachie ved
Ġche cks
isc ons
Ġassist ant
Ġwhen ever
ĠA ccess
ĠU r
b in
Ġcl ock
is p
op her
Ġb orrow
Ġm ad
Ġperson ality
on ly
IS T
ab ama
Ġg ains
Ġcommon ly
Ġter r
Ġhyp ot
Ġre ly
Ġt iss
iscons in
Ġrid ic
f unction
ĠO regon
Ġun com
r ating
el and
ĠN C
Ġm oon
ann on
Ġvulner able
ut ive
ÂłÂł ÂłÂł
ĠRad io
Ġw estern
se ct
ĠT ony
Ġocc urs
ĠO s
ĠH on
Ã Ń
Ġv essel
ĠScot land
Ġdiscrim ination
Ġsubsequ ent
st ring
Ġfant asy
ĠSh adow
Ġtest im
W E
it i
r as
Ġbo at
Ġmar ks
Ġord inary
Ġre n
Ġrepresent ative
Ġpet ition
Ġ7 3
Ġad venture
Ġign ore
ĠPhil adelphia
ĠS av
V P
Ġfact ory
Ġt asks
Ġdep ression
z ed
................ ................
ĠSt orm
Ġc ogn
Ġelig ible
Ġredu cing
v ia
Ġ0 5
Ġstri king
Ġdoll ar
h o
O V
Ġinstr ument
Ġphilosoph y
ĠMo ore
ĠA venue
Ġrul ed
ĠFr ont
IN E
ĠM ah
Ġscen ario
ĠNAS A
Ġen orm
Ġdeb ut
Ġte a
T oday
Ġabs ence
S im
Ġh am
le ep
Ġt ables
ĠHe art
M I
K e
re qu
V D
m ap
Ġchair man
Ġp ump
Ġrapid ly
v i
Ġsubstant ial
E P
d es
ch ant
ili pp
ĠS anta
ri ers
anche ster
L oad
ĠC ase
Ġsa ving
Ġ7 4
ĠA FP
er ning
oun ced
ĠMin nesota
ĠW as
Ġrec ru
Ġassess ment
ĠB ron
U E
Ġdynam ic
Ġf urn
ul ator
Ġprop ag
h igh
Ġacc ommod
Ġst ack
ĠS us
w rit
Ġre ven
ĠGod d
ĠZeal and
ab s
Ġbr ut
Ġper pet
h ot
Ġhard ly
ĠB urn
ãĤ ¹
Ġst y
Ġtrans actions
Ġg ate
Ġsc reens
Ġsub mitted
Ġ1 01
Ġlangu ages
ugh t
em en
Ġfall s
Ġc oc
Ĥ ¬
Ġstri kes
p a
Ġdel iber
ĠI M
Ġrel ax
ann els
ĠSen ator
Ġext rem
Ġ} ,
ĠDe b
Ġbe ll
Ġdis order
c ut
Ġi OS
Ġl ocked
Ġem issions
Ġshort ly
" ]
ĠJud ge
ĠS ometimes
Ġr ival
Ġd ust
Ġreach ing
F ile
Â¯Â¯ Â¯Â¯
ino is
ĠJ ason
Ġs atell
are t
Ġst ations
Ġag ric
ĠTechn ology
com es
ĠUn fortunately
ĠChild ren
Ġappl ies
ast ed
Ġan ger
ail ability
ĠDam age
Ġcomp are
ĠStand ard
Ġaim ed
ĠB a
angu age
Ġreg ulation
Ġj ury
Ġair port
Ġse ctions
ĠPr ince
em ed
Ġmedic ine
Ġh itting
Ġsp ark
ol ves
Ġad s
St ate
Ġfood s
Ġrepl acement
Ġch icken
Ġlow est
Ġmind s
Ġinvol ves
u i
Ġarr ang
Ġproced ures
ĠWh ich
ivers ary
Ġb ills
Ġimprove ment
Ġin ev
Ġexpect ations
Ġintellect ual
Ġsp aces
Ġmechan ism
2 50
bre ak
ĠZ e
ĠT enn
ĠB alt
Ġbar rel
Ġstat ic
man n
Pol ice
Ġt ips
Ġhand ling
c us
od ed
il ton
ir y
Ġjournal ists
our se
Ġcom ic
Ġnom ine
IT Y
Ġvers us
Ġlo op
Ġsur f
ĠInd ust
ĠHun ter
Ġbelief s
is an
Ġset up
Ġbre w
im age
Ġcomput ers
f ol
} ,"
ĠMed al
Ġtax p
Ġdisplay ed
Ġg rav
Ġf iscal
M on
ĠMos cow
ĠK ong
ĠCent re
Ġcamer as
ĠMr s
ĠH ay
Ġa ver
ĠK elly
p y
Ġrequire ment
Ġent itled
omb ie
Ġsh adow
ag ic
ĠA k
Ġel ite
Ġdiv ided
Ġhead ing
Ġcop ies
Ġloss es
Ġv it
k ed
ĠB ry
Ġan s
ĠSte am
Ġrep orter
he im
ĠIt em
Ġsuper ior
d on
ere nt
Ã ¶
Ġtherap y
Ġpe ak
ĠMod el
Ġl ying
Ġg am
z er
r itten
Ġrespons es
Ġconsider ation
ĠB ible
Ġl oyal
Ġinst ant
Ġp m
ĠFore st
Ã ¼
Ġext end
Ġconv icted
Ġfound er
Ġconv in
ĠO ak
che ck
Ġsch olars
p ed
Ġover se
T op
c ount
ĠAr k
Â ·
Ġ0 6
ĠL A
m d
ĠLat in
im ental
ĠC PU
Ġsubst ance
Ġminor ity
Ġmanufact uring
E r
ocol ate
Ġatt ended
ĠMan ager
r ations
Ġappreci ate
om y
GB T
id ency
B L
Ġguarant ee
pos ition
Ġo cean
clud e
Ġhead ed
Ġt ape
Ġlo ose
Ġlog ic
Ġpro ven
Ġsp ir
Ġad mit
is a
Ġinvestig ate
Ġ199 4
sy lv
ĠL ost
c est
Ġ7 1
Ġrequest ed
Ġwind ows
ĠPok Ã©
ĠWith out
M et
Ġbehavi our
Ġread er
Ġh ung
ĠKe ep
Ġro les
Ġimplement ed
Ġbl ank
Ġserv es
ĠJ ay
Ġc ited
ĠF riend
prof it
ap on
Ġrep air
it em
arr ass
Ġcrit ics
ad i
ĠF ather
Ġsh out
Ġf ool
Ġ8 8
Ġprodu cing
Ġl ib
Ġround s
Ġcirc le
Ġpre par
Ġsub mit
Ġn ic
mor row
ãĥ «
U nder
Ġv ital
ater n
Ġpass word
Ġpublic ation
Ġprom inent
Ġspeak s
Ġb ars
Ġde eper
ĠM ill
port ed
Ġw id
Ġbut ter
Ġsm oking
Ġindic ates
K ey
rop ri
ĠF ile
all ing
ast ing
ĠR us
Ġad j
Ġ7 9
av al
Ġpres um
bur gh
on ic
Ġf ur
Ġpoll s
ik a
Ġsecond ary
Ġmon ster
ig s
ĠCur rent
E vent
Ġowners hip
end ar
Ġarri ve
ĠT ax
Ġn ull
ĠPri v
Ġth ro
Ġk iss
c at
Ġup set
ang le
it ches
ect or
olog ists
ĠGal axy
Ġcor ruption
Ġh int
ent er
ĠH ospital
Ġgreat ly
Ġbeg un
es y
Ġso il
ĠAnt on
Ġmain tenance
ãĥ ©
Ġdo zens
Ġhuman ity
ĠAl abama
Ġr om
w orth
ap ing
sylv ania
l ah
Ġg athered
G A
Ġattack ing
f ound
ĠSqu are
Ġar bit
ict ions
ĠW isconsin
Ġd ance
ĠS aint
arch y
Ġbase ball
Ġcontribut ions
Ġliter ature
Ġex ha
per ty
t est
Ġb ab
Ġcontain er
let ter
Ġfall en
Ġwebs ites
Ġbott le
ĠS ac
Ġbre ast
ĠP L
Ġveter an
Ġinterview s
ĠA le
Ġb anned
eng ers
ĠRev olution
in th
Ġconc erning
IV E
Ġexp enses
ĠMatt hew
ĠColumb ia
d s
ist ance
Ġent ity
.. ."
Ġrel iable
Ġpar alle
ĠChrist ians
Ġopin ions
Ġin du
l ow
Ġcompet e
Ġth orough
Ġemploy ed
Ġestablish ment
ig en
ĠC ro
Ġlawy ers
ĠSt ation
T E
ĠL ind
ĠP ur
it ary
Ġeffic iency
âĢ Ĳ
ĠL y
Ġm ask
Ġdis aster
Ġag es
ER E
es is
ĠH old
Ġcas ual
b led
Ġen abled
ĠEn vironment
ĠInt elligence
i per
ĠM ap
ĠB E
Ġemer ged
is dom
Ġc abin
Ġregist ration
Ġfing ers
Ġro ster
Ġfram ework
ĠDo ctor
et ts
Ġtransport ation
Ġaware ness
H er
Ġattempt ing
O ff
ĠSt ore
ÃĥÃĤÃĥÃĤ ÃĥÃĤÃĥÃĤ
ĠK now
Ġdef ence
Ġsc an
ĠT en
ĠCh air
ĠP H
ĠAtl anta
Ġfuck ing
Ġans wered
b n
ĠK ar
Ġcateg ories
Ġr ational
Ġc ust
Ġrob ot
Ġcorrect ly
Ġg if
Ġgraph ics
m ic
Ġground s
ĠO pp
i ate
Ġdist ributed
Ġsan ctions
Ġchalleng ing
ut o
Ġingred ients
Ġinv ited
Ġfound ed
ĠRe qu
d ed
Ġb owl
Ġbrother s
ĠH a
I O
Ġw ages
im ore
oc ial
Ġse ed
ative ly
Ġaddress es
ĠI owa
ab eth
Ġatt itude
is d
ch ild
Ġm ole
Ġdisco very
y ard
B r
Ġ8 2
Ġsuppl ies
ell ing
Ġdist ingu
C R
Ġre cept
Ġ vert
Ġsw im
b ec
d oor
ĠY eah
Ġg al
Ġinter act
ĠE SP
ĠC S
amp s
Ġconvin ced
Ġobject ive
Ġdis h
ĠPhot os
l ad
Ġdownt own
o il
in ction
Ġto morrow
ĠC OM
Ġsurv ival
sh ot
Ġsett lement
C ons
ĠX box
int erest
ĠS M
arg o
en ess
Ġeth nic
b ered
M in
ĠT ok
Ġinc ent
ĠComm and
Ġmain tained
Ġbreak s
br idge
at ar
ag g
ĠF inally
un icip
ĠO nt
le ft
Ġrecogn ition
Ġ* /
ĠP ers
Ġwe lf
Ġaddress ed
ĠK ansas
Ġvir us
Ġwhere as
Ġp apers
ram s
ĠMin istry
Ġple asure
Ġacqu ired
Ġd uration
j pg
Ġcal m
ĠN HL
Ġburn ing
Ġfold er
ick ed
ĠP y
ĠIll inois
Cl ass
ĠGodd ess
Ġperform ing
Ġwelf are
j ar
In ter
Ġl in
Ġenh ance
Ġnot ion
f are
yp es
ĠAre a
Ġcann abis
ĠDie go
f s
ĠM anchester
com m
in ite
Ġcover ing
ĠS ound
Ġ19 60
Ġ8 4
e lect
z ing
Ġcitiz en
Ġph ones
Ġr aid
Ġign ored
ĠOb ject
Ġu pload
c ard
Ġmod ified
Ġroom s
ia h
r ange
he ast
ach us
Ġsuggest ing
âĢ ĭ
gr ade
E l
Ġclot hing
Ġr h
ĠH an
un ity
en cing
ĠAust in
sec ution
t ra
d em
ĠQ ual
Ġhe aven
Ġst ages
Ġw edd
pl us
ific ial
ĠIm m
ĠH o
iet ies
Ġphr ase
Ġbr ill
act ory
Ġprov iders
Ġsil ence
Ġa er
ĠA I
ĠAd venture
Ġplatform s
Ġdemonstr ated
Ġinter f
ing ton
Ġr aces
Ġgr ade
ult ane
ĠTh rough
f alse
Ġb ow
ĠA B
Ġfl avor
Ġhistor ic
g ov
Ġcol our
Ġview ed
ĠEm ail
el come
Ġinter vention
Ġd iversity
Ġperiod s
Ġre verse
ĠV ery
Ġqu ote
ĠLe ft
th rough
Ġsc rew
Ġland ing
Ġp ill
Ġw et
Ġprot esters
Ġrepe at
av ed
er k
Ġsal ary
ĠPenn sylvania
St ill
Ġmay or
Ġkit chen
Ġfeat uring
ĠM useum
ĠT ournament
ĠF al
Ġser vers
U C
Ġany body
im g
ĠTr ade
ixt ure
the less
Ġfin ance
Ġcl osing
ĠPat ri
i ac
ab el
Ġ> >
or ous
Ġf irms
sc reen
un a
Ġemb arrass
ul se
Ġlet ting
Ġth rew
ile y
Ġch annels
l an
ĠVeg as
Ġse ar
Ġfant astic
ar re
uzz le
ĠD er
Th ose
Ġsw ing
Ġshe et
ind ex
co ver
og an
Ġvari ables
ĠTe ch
Ġsp oken
ac hel
ĠD a
ĠMount ain
Ġload ed
Ġfoot age
vers ion
Ġun l
ĠPh oenix
Ġthrow ing
Ġf iring
Ġtrack ing
Ġw idth
Ġstrugg ling
ro oms
ot ion
Ġmonth ly
ĠSer ver
Ġegg s
op en
M C
Ġ199 3
Ġh ired
Ġstay ed
ĠAll en
Ġst ro
Ġ9 8
st ep
ĠTurk ish
Ġfab ric
ist ing
ĠD om
Ġd ates
Ġpr on
Ġbasket ball
Ġl ucky
ĠArab ia
Ġassum ed
est y
Ġaff airs
Ġgl ad
ĠInd eed
ĠF A
ĠW ord
Ġjo ining
if ice
p read
ir ts
ĠSe lect
Ġpop ulations
aw are
Ġn ose
Ġcompl aints
st art
Ġsc oring
Th anks
Ġmin ing
Ġvisit ors
S H
Ġdam aged
Ġcharacter istics
ĠP ent
D C
Ġ8 3
ĠS ix
r ates
Ġfl ags
ĠB rew
d og
M ark
// //
Ġexec ution
Ġj oke
ph ones
Ġtestim ony
Ġob st
Q L
ĠC ut
Ġstud ied
ĠN intendo
ick et
ĠN BC
Ġl ad
ĠB ra
ĠM oh
Ġk ernel
Ġoverwhel ming
Ġag ed
Ġapplic able
ĠC ond
Ġroad s
ĠBl ock
m ade
od ge
Ġcomm ands
Ġoff ices
vel and
Ġt ut
Ġrece iver
ĠF ro
Ġsho pping
Ġi P
ĠSt re
ĠA BC
Ġentertain ment
ĠB ow
ort ed
M c
Ġread s
gr ad
ĠCol lect
Ġâ ĪĴ
ĠCap ital
eder ation
Ġemploy er
Ġinvolve ment
Ġanx iety
al ia
Ġro of
ĠAm ong
ĠDemocr at
Ġstat s
ĠV ill
Ġconst itutional
Ġrefer ring
itt y
Ġtack le
out ube
Ġback ed
ĠH ong
ĠBro ad
Ġe le
ĠO tt
Ġ199 2
h our
achus etts
C al
Ġdefe ated
Ġ8 1
es p
Ġseem ingly
w as
ĠJ enn
ĠK urd
Ġg ene
Ġdisc ount
R et
EC T
( );
Ġclub s
Ġs id
ĠM arsh
Che ck
Ġp p
ĠE ag
ides pread
Ġbe ings
F T
Ġintrodu ction
ĠCh ange
AR D
Ġ1 10
ad ows
ier ce
Ġme al
a uthor
ĠB ang
lah oma
Ġr anks
201 1
?? ??
m ax
Ġcoll apse
Ġop ens
Ġe cho
Ġs oph
Ġrac ist
Ġenorm ous
Ġw aves
Ġt ap
Ġcomprehens ive
. --
ĠR oy
Ġfarm ers
Rel ated
a ired
ron es
ĠC rim
Ġproport ion
Ġdesign s
Ġnegoti ations
Ġvirt ually
ĠBat man
Ġwar n
Ġlegit imate
m ate
Ġcon vention
, ,
net ic
ĠS D
Ġconsist ently
Ġcompens ation
Ġpunish ment
Ġy e
Ġt ie
ĠB ureau
ir lf
ĠB u
ĠA ren
ĠPh ilipp
Ġkn ife
Ġmem ories
ĠR oss
Ġang le
Ġ8 6
ĠTh under
Ġre nd
ĠT our
Ġcount s
s ung
ĠIm p
Ġeduc ational
Ġaccess ible
C OM
Ġd rew
y er
G l
am ine
OR T
O B
I B
m aster
Ġtri als
og y
h ar
ĠTr ust
Ġprefer red
irlf riend
ĠN ev
Ġb in
Ġc ow
P age
Ġsign ature
ĠB L
7 00
Ġret ired
Ġby tes
Ġneigh b
ĠLeg end
Ġdev ast
Ġsuspect ed
is ons
ĠPokÃ© mon
sc ale
Ġcap abilities
Ġre vel
Ġche ese
d y
igr ant
Ġfail ing
b its
ĠHer oes
ĠG host
ĠS cient
Ġappoint ed
ur i
Ġinst itution
Ġexpand ed
g reg
Ġmonitor ing
Ġp odcast
Ġcoal ition
Ġ9 6
J o
Ġst olen
ĠS ab
Ġstop s
Ġhol iday
Ġint r
C ar
Bl ack
ĠL GBT
Ġwar ming
ĠAnd erson
Ġ8 9
Ġprodu cer
M ed
Ġaccur acy
ĠMar vel
iz abeth
ĠPat rick
m ony
Ġmin i
ac les
Ġover t
the y
Ġmembers hip
ĠV en
Ġex ch
Ġrem oval
ĠD ave
T Y
m ad
ĠF ind
Ġad equ
Ġe c
Ġte eth
Ġemot ion
Ġper m
Ġsole ly
d b
Ġextra ord
IG HT
c al
Ġgu idelines
Ġd ying
Ġsusp ended
ĠPrem ier
ĠAnth ony
el ve
Ġd ad
ĠE th
ĠFoot ball
Ġabandon ed
Ġ< <
Ġm arch
Ġhor ror
âĢ¦ "
Ġchild hood
Ġcampaign s
Ġl unch
ĠAl bert
bl ock
âĸĪ âĸĪ
ound ing
Ġb one
or gan
ad ers
ĠFl ash
ĠDri ve
Ġton ight
Ġw ars
ĠF L
Ġform ation
con st
New s
Ġcom pe
or ious
ĠSt aff
Ġdiscuss ions
ĠProt ection
ĠJ am
Ġcrit eria
Ġinstall ation
Ġaccompl ish
iz za
Ġpub lisher
Ġresc ue
ĠT ry
U LL
ĠS om
ĠH op
ore t
th s
ord on
Ġp ocket
ĠIn v
Down load
ĠCr ime
Ġb ene
ĠGu ide
ĠAs sembly
Ġparam eters
I E
ĠAlex ander
Ġconc ert
ĠSc he
Ġsh oes
Ġvis iting
Ġrec all
Ġb ub
Ġr ural
Ġconc rete
ĠR os
N ext
R uss
Ġlo ans
ĠSh ield
Ġtre m
hem at
k g
ĠHar ris
is ition
ĠM ove
ĠF C
Ġf ate
ĠCh o
Ġt ired
Ġprinc ipal
h ist
ien ces
ath y
Ġse vent
Ġm ood
Ġstrateg ic
Ġdise ases
Ġfor um
Ġtem por
Ġhead quarters
P ar
ig e
fl ix
Ġgu itar
Ġ9 4
On ly
Ġrele ases
ro ph
================ ================
Ġ6 00
ĠContin ue
ig ate
ĠC rit
sy stem
Ġdis abled
Ġunex pected
ith ub
Ġuncle ar
ĠE st
Ġcontr ad
Ġstrateg ies
vent ures
Ġpass age
AM E
Ġimpro ving
Ġreve als
Ġdecre ase
ov a
Ġann oy
ĠSh ort
ĠL ibrary
Ġcy ber
n ell
ĠH ur
ĠC B
Ġphot ograp
U I
Ġs ed
G e
Ġ8 7
Ġd iverse
Ġencour aged
Ġcons piracy
Ġbird s
Ġoper ator
Ġhand ful
Ġclass ified
? )
Ġdram atic
Ġinvestig ators
it o
Ġw idespread
ĠR oom
-------------------------------- --------------------------------
Ġcollect ive
Ġjournal ist
St ring
Ġtemper atures
il a
Ġgu id
Ġins pect
Ġmiss ile
ĠMay or
Ġman ual
Ġsim ultane
Ġrat ings
Ġsu ck
Ġ9 7
Ġunivers al
Ġph arm
Ġdis rupt
ian o
A V
Ġf t
Ġstat ist
old s
ĠWalk er
ph p
Ġunder t
ĠL as
ish op
nt il
res hold
ĠWhe ther
M s
Ġden y
ĠCl oud
Ġprov ider
Ġsurv iv
ĠUp date
h as
Ġmist akes
ch arge
pl ed
r ity
Ġn ode
ĠMass achusetts
ool s
lic ation
Ġf ails
em ale
or i
back s
Ġsh irt
Ġ' '
ĠN AT
Ġwat ers
els on
Ġe ase
Ġsc ar
Ġcont ents
m ind
Ġcont ribution
Ġsh r
Ġhand ed
Ġst ability
Ġtra ve
E m
Ġmir ror
12 3
Ġwe igh
Ġf iction
ou ver
ist ant
r ition
ĠF ed
Ġphys ically
Ġst ake
ĠArt icle
ĠAr c
ĠLew is
ĠM ind
Ġdemonstr ate
Ġprof its
v ision
om ic
ol id
Ġbatt les
Ġdri ves
Ġeas tern
ĠS ony
!! !
ar ation
v ard
ĠG L
port ation
Ġ9 2
Ġlaw makers
Ġprotect ing
ĠE PA
Ġy eah
Ġsh ame
ol ph
e ven
x it
Ġatt ach
Ġrepresent ing
Ġob s
ĠUt ah
iff s
ĠFre edom
Ã ³
A K
Ġinc idents
it age
Ġview ers
c d
Ġm ouse
Ġcl ar
Ġaccord ance
Ġb ot
c or
ĠSum mer
he ld
Ġinnoc ent
Ġiniti ative
ol s
________________ ________________
Ġsp ots
p ace
Ġconvent ional
Ġcorpor ations
Ġblock ed
H D
at tered
Ġref ers
Ġbu ck
ĠDig ital
12 0
Ġtop ics
T F
Ä ģ
br id
re ement
Ġunder lying
ĠM ember
Ġinvestig ating
Ġpregn ancy
Ġtouch down
ĠB and
ĠCall er
Ġinst ances
P P
w a
G ood
Ġ199 1
ĠC old
Ġfear s
Ġrem arks
Ĩ Ĵ
at al
Ġm it
Ġexper iments
i pt
Col or
ind u
Up date
Ġ9 3
A g
Ġ å
anc ouver
B oth
Ġjud ges
Ob ject
Ġst ere
umb n
Ġparticip ation
ĠSt ars
ĠJ ere
Ġweek ly
ĠB an
Ġconvers ations
ĠP itt
u z
ĠIndian a
ĠK ick
Ġinf ection
Ġhero es
Ġsett led
Ġstri p
Ġh al
Ġd ump
ĠS ci
Ġl es
Ġref erences
ĠU RL
ĠBr idge
Ġwant ing
For ce
Ġex clus
Me anwhile
m n
Ġg entle
m aker
sen al
ĠG ro
ou ri
ĠR ain
ĠAll iance
Ġl ift
el a
S D
ĠCle veland
Ġrank ed
Ġst adium
Ġdead ly
ä ¸
Ġr iding
ar ia
ĠAr mor
Ġdocument ation
ĠGree ce
ree k
Ġl ens
ĠS a
Ġg ross
ĠE mer
ag ers
ĠD ub
ĠR h
ĠAM D
Ġarri val
Ġdes ert
Ġsupp lement
ĠRes p
Ġkn ee
Ġmarg in
f ont
og g
201 0
ĠP ir
ĠP rom
iv als
Ġint ake
Ġdifferent ly
ug s
Ġb its
clud ed
Ġsearch ing
ĠD u
um ble
Ġfunction al
ĠBalt imore
ĠC ould
Ġdes ired
Ġcirc uit
ĠL yn
ĠG O
ĠF alse
re pre
' :
alt ies
Ġmin im
Ġdro ve
ĠSh ould
Ġh ip
Ġpro s
Ġut ility
ĠN ature
ĠM ode
P resident
o pp
r at
form ance
Ġconcent ration
Ġf ont
ĠB ud
Ġam id
Ġre vers
ĠM L
B ar
Ġinter action
Ġjur isd
Ġspell s
d ep
f il
Ġcivil ians
ut ter
ĠCo oper
ĠBel ow
Ġent rance
Ġcon vert
Ġcontrovers y
ow ered
Ġcontr ary
Ġar c
ĠExec utive
ĠOffic er
Ġpack ages
Ġprog ressive
w idth
Ġreserv ed
v ol
ĠSam sung
Ġprint ed
Ġcent ers
Ġintrodu ce
ĠKenn edy
Ġodd s
Ġsure ly
Ġindepend ence
Ġpass engers
repre ne
ĠBe h
Ġl oves
ĠESP N
Ġfac ilit
Ġident ical
Ġdo ct
Ġpartners hip
con f
ĠH ide
Ġconf used
ĠC ow
M en
Ġw rest
ĠIraq i
Ġh oles
ĠStud ies
Ġpregn ant
h ard
Ġsign als
I X
Ġpull ing
Ġgrad uate
Ġnomine e
D ate
Ġper mitted
Ġâ Ĥ¬
ĠOk lahoma
St art
Ġauthor ized
Ġal arm
ĠC os
v an
Ġgener ations
c ular
Ġdr agon
ĠSoft ware
ĠEd ward
Ġcontro ller
S en
ge red
ĠV ik
Ġappro ached
Th ank
Ġcan ce
Ġform ula
ĠSm all
Ġweak ness
Ġr amp
it udes
j ud
Ġbrill iant
Ġacc us
s ource
Ġ8 00
ĠE vil
S w
Ġhom eless
we ek
i ens
r ics
ĠTh ird
T O
Ġorgan ic
Ġpresent ation
ag h
ĠDown load
v ation
Ġas sembly
or able
hold ers
ĠBern ie
ĠHel p
Ġt ong
ĠF ight
Ġbe ach
B ook
ĠL ic
Ġr ush
ĠR ound
ou p
ĠMar x
Ġcalcul ated
ĠDe vil
ĠSar ah
Ġoccasion ally
Ġbul let
Av ailable
g ate
Ġ9 1
Ġh osp
Ġprom ises
ĠH IV
ĠSt adium
ĠSt ock
ĠCorpor ation
g age
N G
ĠC redit
Ġs ne
ib l
Ġacc um
s uch
Ġterror ists
Ġconscious ness
ĠZ h
Ġdram a
ool a
pir ation
Ġlab our
ĠN in
Ġut ter
Ġdemocr atic
Ġass ass
il ation
Ġg est
Ġab road
Ġmet ab
Ġs orts
Ġfl av
U B
Ġm g
ĠNot hing
ĠO d
Ġmus ical
200 9
Ġdro ps
oc ated
ater al
0000 00
Ġg re
Ġequ ality
Ġburd en
Ġv ig
ĠLe ader
-------- ----
Ġcere mony
Ġf ighter
Ġact ors
Ġ æ
am an
F i
Ġal ign
put er
Ġe lder
ĠN SA
Ġrepresent ation
ĠOnt ario
IT H
usal em
Ġharass ment
itz er
Ġsy mp
Ġbox es
ĠD R
Ġman ifest
at re
Ġ ^
Ġd ies
le ton
Ġmiss ions
et he
Ġres olve
Ġfollow ers
Ġas c
Ġk m
l ord
am med
Ġsil ent
ĠAssoci ated
Ġtim ing
Ġprison ers
ĠK ings
ĠF ive
Ġtow er
Ġappro aches
Ġprecise ly
Ġb ureau
ĠM other
ĠI ss
Ġkey board
it ual
Ġfund ed
Ġstay ing
Ġpsych ological
Ġm ile
ĠLe on
ĠBar b
w ill
Ġw ider
ĠAtl antic
Ġt ill
ĠR ome
ro t
Ġaccomp an
Ġfl our
ac o
W orld
ĠExp ress
ĠY u
C or
Ġple ased
part y
Ġpoint ing
Ġinf lation
Ġro y
Ġ ),
ain er
Ġwedd ing
orm on
Ġrequ iring
Ġqual ified
Ġse gment
EN D
Ġs izes
e als
Ġcor rupt
ass ador
Ġcele b
Ġdream s
ĠM ess
Ġcheck ing
ĠV ersion
Ġprep aring
Ġact ively
ĠD iff
Ġl ux
ĠW inter
act eria
ĠN E
Ġdep uty
Ġtrans gender
Ġsum mary
Ġin her
er ies
ch ar
ĠY an
Ġkn ock
ĠP ath
Ġl ip
roll er
Ġimp ression
Ġcelebr ate
Ġsl ide
Ġgu ests
Ġcl ip
F S
Ġsav ings
Ġcapt ain
Ġleg acy
ĠDen ver
Ġw ounded
tab oola
AC T
Ġpurs ue
Ġo xy
Ġ q
Ġsem i
ĠN eed
ĠAff airs
Ġob sc
Ġcheck ed
Ġd ual
C ode
ĠM D
le m
ult y
ĠÂ ©
ĠEl izabeth
Ġcent uries
ard ed
s rc
Ġev ident
enn is
at in
Ġunemploy ment
ĠMar io
Ġint im
Ch rist
Ġbi ological
Ġsold ier
ĠAdd ed
Ġm ath
ĠG il
Ġbi as
Ġd ating
ĠO cean
Ġm ice
M us
h ire
ĠT es
Ser ver
lim ited
S ize
Ġmet ers
Ġrock et
es see
Ġcertific ate
ĠIran ian
AS S
Ġgr id
D ec
Ġro lling
com mun
ĠSwed en
b ury
Ġtiss ue
Ġrac ism
ĠL ocal
Ġmyster y
Ġexam ine
Ġst em
Ġs its
Ġhop ed
ot ing
Ġdial ogue
Ġpers u
W atch
l ay
M AN
Ġch ronic
ĠPort land
mark et
ĠS EC
Ġparalle l
Ġsc andal
Ġcar ries
Ġphenomen on
h uman
ack er
ĠO x
Ġretire ment
tain ment
ov ie
ĠG ear
Ġd uties
Ġdo se
Ġsc roll
M B
in f
Ġsa uce
Ġland scape
red dit
ĠChampions hip
ĠRed dit
al id
Ġco in
Ġover s
Ġpost ing
ab out
Ġf el
and y
Ġb old
Ġfocus ing
e ffect
G R
Ġde emed
Ġrecommend ations
Ġste pped
Ġvot er
ĠDe ep
ĠInst agram
Ġmoder ate
ĠMary land
Ġrestrict ed
ĠM B
ĠCh all
Ġto b
Ġc ir
ĠO cc
ĠE ver
Ġcoll aps
IN FO
= -
ĠP ict
ĠAcc ount
n c
Ġo ught
Ġex port
Ġdr unk
( '
Ġw ise
ĠM ort
ne cess
Ġan cest
ĠInc re
Ġfrequ ent
m ir
Ġinterpret ation
Ġdepend ent
Ġco ins
ĠB ol
V ideo
ĠJust in
Ġfat al
Ġcook ing
Ġconf usion
ip her
Ġcust ody
ĠMor gan
om ach
ĠGovern or
Ġrestaur ants
el ing
Ġacknowled ged
Ġthe r
Ġgen es
ch ing
He y
Ġtact ics
ĠMex ican
Ġv end
Ġhe s
qu er
Ġnot ing
ĠCamer on
Ġtarget ing
ro ck
Ġcred its
Ġemot ions
Ġrepresent atives
new s
Ġlegisl ative
Ġrem oving
Ġtweet ed
ĠCar ter
ĠF ixed
Ġfor cing
Ġspeak er
Ġm ales
ĠViet nam
l ined
Ġconcept s
Ġvo ices
o ir
ĠT rib
W he
ĠJer usalem
ĠS ant
Ġc ul
Ġl ady
ĠHaw ai
Ġar ts
ĠIn n
ĠMach ine
ĠEm peror
Ġsl ot
g ly
ĠPro cess
II I
Ġathlet es
ĠTem ple
ĠRep resent
Ġpres c
Ġt ons
Ġgold en
Ġp unch
ĠG R
iver pool
Ġen act
Ġlob by
Ġm os
Ġpick ing
Ġlif etime
Ġcogn itive
E ach
z o
Ġd ub
Ġcons ists
ol n
Ġf estival
am ous
Ġint ellig
w ords
ĠSm art
Ġde le
Ġl apt
Ġmag ical
ĠS in
b us
ur ities
igh th
ĠRub y
ĠS ure
ol ving
Ġj un
O ST
Ġimp osed
Ġast ron
Ġcor rel
ĠN S
ĠK it
ĠF uture
b urn
Ġimm une
oc us
Ġcour ses
ĠSt ring
Ġle an
Ġg host
Ġout comes
Ġexp ense
Ġevery day
Ġaccept able
A h
Ġequ ipped
Ġor ange
F R
ĠD utch
Th ough
ĠR ank
Q U
ĠRober ts
wh at
re nd
Ġdisapp ear
Ġsp awn
ĠL am
o is
Ġdes erve
Ġmin imal
Ġnerv ous
ĠW ould
Ġro ok
ĠV ancouver
Ġres ign
sh ire
ĠW orks
ĠB uild
Ġafford able
ĠG ary
ĠAren a
Ġh anging
Ġimpl ications
ĠS ong
Ġmain taining
Ġgu ards
C ON
Ġder ived
Ġexecut ed
Ġthe ories
Ġqu oted
ĠAnd re
og a
sel ess
in fo
ĠBel g
Ġt ears
ĠSur v
Ġbirth day
ig ious
im mer
Ġspect rum
Ġarchitect ure
Ġrec ruit
arm a
T able
Ġmon sters
ĠG ov
Ġdest ination
Ġattract ive
Ġf oss
ĠMore over
Ġpres ents
TH E
Ġrep ly
pt on
Ġc um
Ġdel ight
Ġaffect s
Ġdon ations
ĠT oy
ĠH im
M ENT
Ġover come
it ched
ĠFant asy
ĠH at
ĠBe ast
b ott
Ġinvestig ations
R un
Ġhun ting
d i
f und
Ġs essions
est yle
Ġport ray
oid s
Y eah
Ġcommun icate
Ġcom edy
ĠY ang
Ġbel t
ĠMar ine
Ġpredict ed
Pl ay
Ġimportant ly
Ġremark able
Ġelim inate
D avid
Ġb ind
V ID
Ġadvoc ates
ĠG aza
im p
D B
ĠN a
ĠSim ilar
I ES
Ġchar ity
v as
m ath
Ġâ ĸ
ok er
nd um
Ġcap s
ĠH al
2 000
e an
Ġfle et
Ġrec re
R ight
Ġsleep ing
ij ing
k ind
Ġdesign ated
Ã ¤
Ġanim ation
ke e
ĠInt rodu
Ġ/ >
Ġdelay ed
Ġtrem end
Ġcur ious
U se
Ġle ct
d am
Ġinnov ation
ĠPoint s
Ġload ing
Ġdisp ute
ct ic
ird s
ĠB Y
Ġn urs
ĠVal ue
ION S
ĠH um
Ġtem plate
m ers
Ġappear ances
ĠEnter tainment
Ġtransl ation
Ġsa ke
Ġbene ath
Ġin hib
Ġe uro
abet es
Ġstud ying
ĠM as
Ġper ceived
Ġexam ined
Ġe ager
Ġco aches
Ġim per
ch i
Ġprodu ces
" ).
ĠEvery one
Ġm unicip
Ġg irlfriend
Ġh ire
ĠV ice
Ġsu itable
op y
Ġin equ
ĠD uke
f ish
f irst
ĠO bs
Ġinter ior
ĠBru ce
ĠR y
Ġanal ys
Ġconsider able
Ġfore cast
Ġf ert
ors hip
ĠD rug
ĠA LL
: "
th ur
ĠM ail
Ġball ot
Ġinst antly
ĠCh annel
Ġp icks
Ġ198 9
Ġt ent
ol i
Ġcivil ian
b ling
ell o
b u
Ġin ch
Ġlog o
Ġcooper ation
Ġwal ks
Ġinvest ments
Ġimp rison
ĠF estival
ĠK y
Ġleg ally
Ġg ri
ch arg
S l
Ġthreat ening
du ction
fl ow
Ġdismiss ed
ibr aries
c ap
e le
ĠMc G
ĠHar vard
ĠConserv ative
ĠC BS
p ng
Ġro ots
ĠH aving
umb led
ĠF un
\ /
ĠS earch
ple x
Ġdiscuss ing
Ġcontin u
ĠT ai
ĠW ik
F ree
f it
Ġref use
Ġmanag ing
Ġsy nd
ip edia
w alk
Ġprofession als
Ġguid ance
Ġunivers ities
Ġas semb
unt u
F inally
AS E
ĠAut o
ĠH ad
Ġann iversary
L D
ĠD ur
ĠUlt imate
ih ad
pro duct
Ġtrans it
Ġrest ore
Ġexpl aining
Ġass et
Ġtransfer red
Ġbur st
ap olis
ĠMag azine
ĠC ra
ĠB R
gg ed
ĠH E
M ich
b et
ĠL ady
yl um
erv es
Ġme ets
wh ite
L og
Ġcorrespond ing
Ġins isted
G G
Ġsurround ed
Ġt ens
Ġl ane
Ġco inc
h ome
Ġexist ed
ect ed
ĠDou ble
lam m
Ġske pt
ex p
Ġper ception
ie v
ĠBe ing
o ft
Ġadop t
. :
] ;
Wind ows
Ġsatell ite
AS H
Ġinf ant
d escription
ĠMe anwhile
c m
oc a
ĠT reat
act or
Ġtob acco
ĠN orm
em ption
Ġfl esh
Ġj e
o op
ĠHe aven
Ġbe ating
an im
Ġgather ing
Ġcult iv
G O
ab e
ĠJon athan
ĠSaf ety
Ġbad ly
pro t
Ġcho osing
Ġcontact ed
Ġqu it
Ġdist ur
Ġst ir
Ġto ken
D et
ĠP a
Ġfunction ality
00 3
s ome
Ġlimit ations
Ġmet h
b uild
con fig
N T
re ll
ble m
ĠM om
Ġveter ans
ĠH u
Ġtrend s
are r
ĠG iven
ĠCa ption
m ay
AS T
Ġwond ering
ĠCl ark
n ormal
Ġsepar ated
Ġdes p
st ic
b rew
Ġrel ating
ĠN ik
ĠF arm
Ġenthus i
g ood
d eb
Ġactiv ist
Ġm art
Ġexplos ion
ĠEconom ic
L ink
Ġins ight
Ġconven ient
Ġcounter part
su pport
ĠV irt
ag en
ĠTenn essee
ĠSim on
ĠA ward
OC K
ĠF igure
Ġoverse as
Ġpr ide
ĠC as
n ote
m g
C urrent
Ġdispl ays
cont ent
Ġtravel ing
Ġhosp itals
ĠFin ancial
ĠP ast
Ġdefend ant
Ġstream ing
m ble
ĠBer lin
uk i
Ġdist ribut
Ġant ib
Ġch ocolate
ĠCast le
Ġinter rupt
ĠR ow
Ġconvers ion
Ġbug s
ĠR ather
li est
L Y
ĠJe an
com mon
ak h
Ġ1 30
ot ton
ĠDe an
Ġam endment
Ġgame play
ĠWar ren
od a
Ġhigh lights
Ġir re
ĠNAT O
Ġball s
Ġdemand ing
U RE
ĠL uke
F igure
st op
on ia
z one
iz ers
ĠW R
Ġaward ed
Ġregul atory
ĠH art
ĠS N
pl ing
Ġs our
ĠP ixel
us ive
Ġf et
ĠS ent
Ġautom atic
Ġf er
vern ment
ĠKh an
T ON
f ather
Ġextraord inary
th rop
ĠP ython
ĠG PU
Ġsex ually
Ġdesk top
it ivity
ĠAnton io
Ġo rient
Ġe ars
ob by
ous es
vertis ements
Ġmanufacture rs
ic ient
min ute
Ġconv iction
Ġg arden
p ublic
Ġsatisf ied
f old
O K
Ġin hab
ĠTh ink
Ġprogram me
Ġst omach
Ġcoord in
Ġh oly
Ġth reshold
Ġr het
Ġser ial
Ġemploy ers
ĠEvery thing
ra h
Ġb other
Ġbr ands
Val ue
ĠT ed
ĠPlan et
Ġp ink
ĠFurther more
s a
P E
re ck
ĠUS D
ot te
Ġ& &
Ġland ed
g ets
Ġprodu cers
Ġhealth care
Ġdomin ant
Ġdest ro
Ġam ended
ch ron
Ġf its
ĠSy d
ĠAuthor ity
AT CH
Ġfight s
ĠL LC
Ġ-- -
ĠCor p
Ġtox ic
spe cific
ĠC orn
ĠChe l
Ġtele phone
ĠP ant
Ġmyster ious
aun ch
od ox
med ia
Ġwitness es
ag u
Ġquestion ed
ĠBre xit
ĠRem ember
ene z
Ġend orse
iat ric
ĠId ent
Ġridic ulous
1 10
Ġpr ayer
Ġscient ist
Ġ19 50
ĠA qu
Ġunder ground
ĠU FC
m are
ĠL ater
w ich
Ġsubsc rib
Ġhost s
Ġer r
Ġgr ants
ant om
Ġsum mon
ear ly
ĠC lear
ĠPr im
Ġsusp ension
Ġguarant eed
app er
Ġr ice
ĠSe an
ĠSh in
Ġrefere ndum
Ġfl ed
r ust
Ġ3 60
ter y
Ġsh ocked
B R
ĠO il
ĠAll ah
Ġpart ly
Ġign or
Ġtrans mission
Ġhom osexual
ivers al
Ġhop efully
ãĤ ¤
Ġless on
L eg
Ġ ..
Y et
t able
app ropri
re tt
Ġbo ards
Ġincor rect
Ġb acteria
ar u
am ac
Ġsn ap
.' "
Ġpar ad
t em
he art
Ġav ailability
Ġw isdom
Ġ( +
Ġpri est
ĠÂł ĠÂł
O pen
Ġsp an
Ġparam eter
Ġconv ince
Ġ( %)
r ac
Ġf o
Ġsafe ly
Ġconver ted
ĠOlymp ic
Ġres erve
Ġhe aling
ĠM ine
M ax
Ġin herent
ĠGra ham
Ġinteg rated
D em
Ġpip eline
Ġapp lying
Ġem bed
ĠCharl ie
Ġc ave
200 8
Ġcons ensus
Ġre wards
P al
ĠHT ML
Ġpopular ity
look ing
ĠSw ord
ĠAr ts
' )
Ġelect ron
clus ions
Ġinteg rity
Ġexclus ively
Ġgr ace
Ġtort ure
Ġburn ed
tw o
Ġ18 0
P rodu
Ġent reprene
raph ics
Ġg ym
ric ane
ĠT am
Ġadministr ative
Ġmanufacture r
Ġ vel
ĠN i
Ġisol ated
ĠMedic ine
Ġback up
Ġpromot ing
Ġcommand er
Ġfle e
ĠRus sell
Ġforg otten
ĠMiss ouri
Ġres idence
m ons
Ġrese mb
Ġw and
Ġmeaning ful
P T
Ġb ol
Ġhe lic
Ġwealth y
Ġr ifle
str ong
row ing
pl an
as ury
âĢ¦ .
Ġexpand ing
ĠHam ilton
Ġrece ives
S I
eat ures
ĠAn im
RE E
P ut
Ġbrief ly
ri ve
Ġstim ul
Ġ`` (
Ġ __
Ġch ip
Ġha z
Ġpri ze
ĠTh ings
AC E
ul in
d ict
ok u
Ġassoci ate
ock ets
y outube
St ory
ateg ory
Ġm ild
ail ing
ĠY e
O rig
ĠK a
or ig
Ġpropag anda
Ġan onymous
Ġstrugg led
Ġout rage
AT ED
ĠBe ijing
r ary
Ġle ather
Ġworld s
Ġbroad er
12 5
id al
ĠBet ter
Ġt ear
E xt
Ġpropos als
Ġit er
ĠSqu ad
Ġvol unt
m i
D id
ĠP u
p in
Ġspeak ers
Ġb orders
Ġfig ured
= '
Ġsimultane ously
aed a
Ġcharg ing
Ġur ged
Ġcon j
25 6
ĠG ordon
mer ce
Ġdocument ary
Sh are
it ol
ON E
ĠG arden
h att
ĠThom pson
ane ous
ap ore
Ġt anks
Ġless ons
tr ack
Ġout standing
Ġvolunte ers
Ġsp ray
Ġmanag ers
l arge
Ġcamp s
Ġart ificial
ĠR u
Ġb ags
th al
Ġcompat ible
ĠBl ade
Ġf ed
Ġarg ues
F I
Ġunf air
Ġcor n
Ġoff set
Ġdirect ions
Ġdisappoint ed
ĠCon vention
Ġview ing
M E
oc ity
Ġtown s
Ġlay ers
Ġro lled
Ġjump ed
Ġatt ribute
Ġun necess
inc oln
Ġsupp ose
ĠNet her
ch a
Ġbur ied
Ġsix th
B en
ress ing
OU R
Ġw ound
Ġcy cl
Ġmechan isms
Ġcongress ional
ĠE lement
Ġagre ements
Ġdec or
Ġclos est
ĠM it
Go ogle
} }
Ġm ixture
Ġflu id
S ign
ĠSch olar
Ġp ist
ask et
ab ling
Ġrac ing
he ro
ri el
ass y
Ġche aper
b en
Ġvert ical
amac are
ĠRead ing
g ments
Ġhelic op
Ġsacr ifice
ay a
p aren
V A
ĠL es
ĠStud io
Ġviol ations
ĠAn na
ac er
é ¾
ĠR at
ĠBe ck
ĠD ick
ĠA CT
Ġcomp osition
Ġtext ure
ĠO wn
Ġsmart phone
ĠN A
Ġfor b
im port
Ġdef ending
il st
re r
Ġo h
ĠJere my
Ġbank ing
cept ions
Ġrespect ive
/ .
Ġdr inks
ĠW i
Ġb ands
ĠL iverpool
Ġg rip
ĠB uy
Ġopen ly
Ġreview ed
per t
Ġver ify
ĠCo le
ĠW ales
M O
Ġun pre
Ġshel ter
ĠIm perial
Ġgu i
ĠD ak
Ġsuggest ions
Ġexplicit ly
Ġsl ave
Ġblock chain
Ġcompet ing
Ġprom ising
S ON
Ġsoc cer
Ġconst itution
4 29
Ġdist ract
ĠU ser
es ides
ĠMet hod
ĠTok yo
Ġaccompan ied
Cl ient
s ur
al og
Ġident ification
Ġinv asion
as ma
Ġindust ries
pp ers
Ġsub tle
ĠUn it
n atural
Ġsurv ived
Ġfl aw
ĺ ħ
ĠH oll
Ġdef icit
Ġtut orial
ĠCh ance
Ġarg uing
Ġcontem porary
Ġinteg ration
for ward
Ġt um
it is
Ġh iding
ĠD omin
ĠT an
ĠB uilding
ĠV in
Ġspokes person
ĠNot es
Ġemer ging
Ġprepar ation
Ġpro st
Ġsuspect s
Ġaut onom
D escription
Ġdeal t
ĠP ear
Ġstead y
Ġdecre ased
Ġso vere
ĠCl in
Ġgrad ually
ors es
ĠW AR
S erv
ãĤ ¢
h r
Ġd irty
ĠB arn
ĠB C
Ġd il
Ġcal endar
Ġcompl iance
Ġch amber
b b
Ġpass enger
ate ful
ĠT itle
ĠSyd ney
ĠG ot
Ġdark ness
Ġdef ect
Ġpack ed
ass ion
Ġgod s
Ġh arsh
IC K
le ans
Ġalgorith m
Ġoxy gen
Ġvis its
Ġbl ade
Ġkil omet
ĠKent ucky
Ġkill er
P ack
enn y
Ġdiv ine
Ġnom ination
be ing
Ġeng ines
Ġc ats
Ġbuff er
ĠPh ill
Ġtra ff
AG E
Ġtong ue
Ġrad iation
ere r
m em
ĠExpl icit
é¾ į
Ġcou ples
Ġphys ics
ĠMc K
Ġpolit ically
aw ks
ĠBl oom
Ġwor ship
e ger
ut er
ĠF O
Ġmat hemat
Ġsent enced
Ġdis k
ĠM arg
Ġ/ *
P I
Ġoption al
Ġbab ies
Ġse eds
ĠScott ish
Ġth y
] ]
ĠHit ler
P H
ng th
Ġrec overed
ing e
Ġpow der
Ġl ips
Ġdesign er
Ġdis orders
Ġcour age
Ġch aos
" },{"
Ġcar rier
b ably
H igh
ĠR T
es ity
l en
Ġrout es
u ating
F il
N OT
w all
s burgh
Ġeng aging
ĠJava Script
ore r
li hood
Ġun ions
ĠF ederation
ĠTes la
Ġcomple tion
ĠT a
Ġprivile ge
ĠOr ange
Ġne ur
paren cy
Ġb ones
Ġtit led
Ġprosecut ors
ĠM E
Ġengine er
ĠUn iverse
ĠH ig
n ie
o ard
Ġheart s
ĠG re
uss ion
Ġmin istry
Ġpen et
ĠN ut
ĠO w
ĠX P
in stein
Ġbul k
S ystem
ic ism
ĠMarket able
Ġpre val
Ġpost er
Ġatt ending
ur able
Ġlicens ed
ĠG h
et ry
ĠTrad able
Ġbl ast
à ¤
ĠTit an
ell ed
d ie
H ave
ĠFl ame
Ġprof ound
Ġparticip ating
Ġan ime
ĠE ss
Ġspec ify
Ġregard ed
ĠSpe ll
Ġs ons
own ed
Ġm erc
Ġexper imental
land o
h s
ĠDun geon
in os
Ġcomp ly
ĠSystem s
ar th
Ġse ized
l ocal
ĠGirl s
ud o
on ed
ĠF le
Ġconstruct ed
Ġhost ed
Ġsc ared
act ic
ĠIs lands
ĠM ORE
Ġbl ess
Ġblock ing
Ġch ips
Ġev ac
P s
Ġcorpor ation
Ġo x
Ġlight ing
Ġneighb ors
ĠU b
ar o
Ġbe ef
ĠU ber
F acebook
ar med
it ate
ĠR ating
ĠQu ick
Ġoccup ied
Ġaim s
ĠAdd itionally
ĠInt erest
Ġdram atically
Ġhe al
Ġpain ting
Ġengine ers
M M
ĠM ust
Ġquant ity
P aul
Ġearn ings
ĠPost s
st ra
ãĥ¼ ãĥ
Ġst ance
Ġdro pping
sc ript
Ġd ressed
M ake
Ġjust ify
ĠL td
Ġprompt ed
Ġscr ut
Ġspeed s
ĠGi ants
om er
ĠEd itor
Ġdescrib ing
ĠL ie
ment ed
Ġnow here
oc aly
Ġinst ruction
fort able
Ġent ities
Ġc m
ĠN atural
Ġinqu iry
Ġpress ed
iz ont
for ced
Ġra ises
ĠNet flix
ĠS ide
Ġout er
Ġamong st
im s
ows ki
Ġclim b
ne ver
Ġcomb ine
d ing
Ġcomp r
Ġsignific ance
Ġremem bered
ĠNev ada
ĠT el
ĠSc ar
ĠWar riors
ĠJ ane
Ġcou p
b as
Ġtermin al
, -
O H
Ġt ension
Ġw ings
ĠMy ster
ï¿½ï¿½ ï¿½ï¿½
ĠUn like
val id
viron ments
ĠAl i
Ġn aked
book s
ĠM un
ĠG ulf
Ġd ensity
Ġdim in
Ġdesper ate
Ġpres idency
Ġ198 6
h y
IN D
Ġun lock
im ens
Ġhand led
ĠE b
Ġdisapp eared
Ġgen re
Ġ198 8
Ġdetermin ation
St ream
ik o
ap ters
Ġacknow ledge
J an
Ġcapital ism
P at
Ġ20 20
Ġpain ful
Ġcur ve
Ġbom bs
st orm
ĠMet al
en cer
ĠF ig
ĠA aron
anc hes
Ġins piration
Ġexha ust
t ains
ash i
Ġdesc ript
Ġr itual
ĠChel sea
Ġpromot ion
ĠH ung
ĠW ard
iv a
ĠE T
Ġto ss
all ow
ĠFranc is
D ep
Ġhapp iness
ĠGl ass
Ġbet a
Ġstreng then
N E
o a
Ġbutt ons
ĠMur ray
Ġkick ed
Qu est
ĠT alk
ĠS everal
ĠZ ero
Ġdr one
ul k
Ġc am
ĠM obile
Ġprevent ing
Ġret ro
ĠA x
Ġcru el
Ġflo at
. ),
Ġfil ing
ĠGr ant
ĠB or
Ġr ib
Ġchampions hip
ĠM erc
Ġsty les
Ġc ake
Ġbuild s
ĠS elf
io x
Ġep ic
oy d
B el
ĠSt ew
. (
ah u
ĠBe yond
Ġout s
Ġsol o
ĠT ree
Ġpres erve
Ġt ub
AR E
ro c
ĠIm pro
ĠW right
Ġbu nd
Ġtr aged
Ġoccas ional
b ian
Sec ond
r ons
Ġinter actions
form ed
s ing
Ġown s
Ġh ockey
Gener al
Ġlog ical
Ġexp end
Ġesc al
ĠGr iff
ĠC rown
ĠRes erve
Ġsto pping
Ġexc use
sec ond
Ġoper ated
Ġre aches
ĠMal ays
Ġpoll ution
ĠBrook lyn
Ġde lete
Ġhas h
Bl ock
ah a
âĢ ³
Ġsh orter
p iece
> </
Ġh orm
ĠW at
ĠBre ak
Ġprohib ited
Ġint ensity
ĠAl an
Ġli ability
? !
and ed
Ġneigh bour
ĠCol lection
Ġf ires
Ġrevolution ary
f ly
ĠOr leans
Wh ite
ĠW rit
ĠD awn
Ġsett le
Ġexec ute
B M
Ġspokes woman
Ġlif estyle
Ġclick ing
ĠK ill
ĠLiber al
ĠN azi
Ġtra iler
Ġmount ains
Ġdam n
z es
p es
Ġpress ing
Ġb ail
ĠOrgan ization
Ġp ir
Ġth irty
Ġelect rical
Ġ1 15
ĠP oly
ĠR ap
ĠSt rike
ĠC ann
Ġdemand ed
Ġback ing
def ault
spe ed
ĠLeg isl
Ġmother s
ĠB ody
Ġvar iation
ced ented
p owered
le ading
N ever
Ġg rave
ĠAnt i
A W
Ġinterview ed
ĠG ab
ĠF at
Ġrook ie
u u
Ġdep os
ix on
Ġam pl
ret ion
ĠHe at
Ġpeace ful
S M
ie ve
Ġd iver
ĠVict oria
Ġm ic
p df
Ġst ating
Ġl ung
Ġcritic ized
Ġvacc ine
ĠLoad ing
ur se
T ake
ĠFr an
ĠS old
ĠRob in
Ġdetect ed
ĠSc ript
Ġadjust ed
Ġsen ator
Ġopp osing
Er ror
C ount
Ġconflic ts
Ġo w
ĠAr gent
Ġmatch ing
h h
ĠTre k
st arter
" ),
ĠA F
od er
xx xx
ĠAl t
ac re
ĠP ick
ĠSol ar
ĠD al
O ct
ĠB att
Ġs rc
Ġeng agement
Ġexecut ives
Ġliber ty
j ava
Ġtal ented
igen ous
Ġcon secut
.. ...
In fo
Ġhor rible
Ġsurprising ly
f eed
ic ating
ĠL ED
Ġfem ales
St ation
ell er
ĠOak land
Ġmechan ical
i ology
ĠV ar
Ġrob ust
ett ings
ott a
Ġthe oret
Ġret ain
k ward
Ġd a
Ġdeploy ed
d el
ĠAnd y
Ġsubsc ribe
we b
Ġn a
ĠMic hel
Ġpart ially
ĠCome y
Ġc rown
ĠM aj
ĠBl u
r ator
D ay
IN T
Ġdocument ed
ĠG DP
g i
che ll
Ġbrut al
ĠB ab
st ration
Ġthe ft
Ġt ube
@ @
Ġqu ery
ĠL incoln
Ġpublish ing
Ġw ore
or ical
Ġr ic
Ġnot able
Ġsubsequ ently
ne x
Ġobser ve
ĠB oe
Ġc odes
m ain
W H
ĠS L
Ġresident ial
av an
Ġm as
are st
ade on
OU T
Ġsoph istic
ant e
Ġc ens
Ġ **
Ġmort ality
Ġyour s
Ġoccas ions
Ġrec alled
ĠDri ver
Ġv ocal
Ġbath room
Ġsh ops
Ġcollabor ation
ĠOb amacare
ĠC ell
Ch ar
Su per
C re
Ġt ends
Ġt orn
Ġeconom ics
a very
ĠR aid
ĠS em
Ġshould ers
Ġexpect ing
Ġexam ination
en ame
ĠU I
i ability
ol as
ĠAm b
ĠD ra
Ġmid field
ĠI C
Ġlay out
Ġflo ating
f i
it ative
Ġtremend ous
Ġ Ð
Ġab und
W ork
ĠLight ning
Ġsimilar ly
Ġconserv atives
Ġpr ay
B E
iz arre
Ġt empt
Ġemphas is
ĠMet ro
Ġf ishing
Ġmar ry
ne g
ĠStud y
Ġrec k
Ġdis pos
on ing
bs ite
Ġsusp ic
Ġmer ch
ĠG ib
ĠDes cription
ĠD VD
w he
ĠY emen
Ġen vironments
oot ing
ĠMod ern
e u
Ġreflect s
Ġh oney
Ġanaly st
Ġg ut
d ec
A ction
Ġhousehold s
Ġst er
Ġtem ple
Ġreform s
Ġfavour ite
Ġdead line
ĠL E
Th ree
ĠWith in
A ug
Ġnight s
elt a
Ġinv alid
ĠEx change
ĠDel hi
w hen
inc ome
Ġ ðŁ
Ġwire less
sc ribe
ist a
Ġhost ile
Ġall y
Ġg ig
Ġout lets
ĠD or
EM ENT
Ġas h
Ġab stract
OR D
ĠMot or
Ġadv iser
ist le
Ġb ases
Ġcourt esy
Ġcross ing
Ġcle ared
Ġrefuge e
cos ystem
Ġthrow s
f un
bour ne
d ays
Ġdisag ree
ĠN ative
Ġreflect ed
ĠF ast
ĠY ellow
ĠSing apore
ĠR aven
Ġembr ace
ĠK u
ĠC hen
ĠEar ly
Ġappoint ment
ĠMin i
it ement
Ġpl acing
Ġb icy
S R
Ġwh is
S U
Ġinvestig ated
Ġphotograph s
g ithub
ĠBe at
ĠR ing
ig hed
i ar
Ġev olved
eral d
Ġd un
Ġh ub
I AL
Ġencour aging
ĠPr int
ĠD ays
Ġpro secution
Ġp ants
az y
l ive
Ġfoss il
ĠJ u
Ġro cks
ud ge
ĠR ace
Ġg reet
b ie
Ġf illing
ĠL en
Ġdi abetes
Ġfire arms
um ing
enez uel
ĠB B
Ġaccept ing
AT H
Ġres ort
Ġh unt
ri k
uck er
am ents
Ġsust ained
Ġcross ed
Ġbreak fast
Ġatt ributes
lect ed
at ile
Ġv ibr
ĠK al
ars on
op les
Ġtou ched
Ġdam ages
Ġimp ressed
ru p
Ġan ch
ĠAd ams
H el
ĠVict or
Ġmount ed
ĠC C
Ġdelic ious
sp an
ell a
Ġel abor
am ples
Ġdef ic
Ġconstit u
u ates
ĠM ission
ĠT her
ĠMon ster
b es
Re uters
ĠInd ones
h ill
mun ition
Ġconfirm ation
ĠCons ider
ac ent
Ġj et
ĠEm ploy
ĠGT X
n an
ĠSp ider
Ġprocess or
Ġpat ri
ĠPent agon
ĠRob inson
Ġreal istic
Ã ±
Ġappear ing
Ġp ipe
om ed
Ġf ru
Ġaw ful
Ġeval uation
Ġintellig ent
ĠC itiz
Ġfund ra
od ium
Ġtwe ets
Ġwor n
pr ing
Ġkid n
Ġreb els
ĠK am
ĠNether lands
ĠS W
Ġacqu isition
ĠM ale
ãĥ ª
omb ies
Ġtrad em
ĠStat us
B re
ĠTH IS
Ġad verse
ĠN EW
s ign
Ġorgan isation
en c
ĠHar per
ap or
ĠMem bers
ĠPe ace
ĠAir port
ĠOther s
Ġscr atch
ĠP il
Ġsens or
Ġadop tion
ĠHot el
ĠDr ag
Ġhonest ly
Ġy ard
ĠFor ces
Ġpat ent
Ġb ass
Ġquiet ly
Ġbreat hing
Ġp ose
i ors
ĠJ ess
st atic
IT E
O ffic
Ġj ew
w cs
Ġ14 0
Ġpre view
ipp i
Ġunf ortunately
oke mon
Ġh orn
Ġre ass
Ġpe er
ock er
Ġunt o
ĠGr ay
Ġclean ing
Ġattract ed
200 7
P oint
k ill
ĠAg reement
ur ches
Ġhor r
ĠMiss iss
Ġworth y
Ġfl owers
t own
d ll
Ġre actions
Ġde ce
Ġindic ating
M D
Ġpre ference
ĠM VP
ess ional
ĠT arget
g ence
ĠInd ians
Ġm isc
Ġfree ly
Ġmus cles
Ġline up
Ġimpact s
ous ing
om i
ac ular
Ġcontro lling
ag ine
c ery
he ll
Ġrank ing
ĠN ich
ĠA ve
12 8
Ġhigh way
Ġinc ons
Ġb inding
Ġstrugg les
ĠPitt sburgh
Ġgr ay
r in
Ġcom ics
ĠS port
Ġrel atives
Ġfr ight
Ġpro be
ĠPort ug
Ġv oc
Ġt u
ĠCor ps
Ġposs ibilities
Ġqual ify
wcs store
Ġl ibraries
Ġm igrants
Ġent ries
Ġconsecut ive
v als
ĠChair man
Ġh ill
IM E
ĠG ard
Ġinequ ality
f ox
ĠS ave
Ġc ort
claim ed
Ġtra its
Ġp our
Ġmiss iles
Ġess ence
Ġs ends
Ġall iance
Ġw ishes
ĠChrist opher
B ig
N Y
ĠJac ob
s an
ur red
ĠS O
ll y
Ġadvoc ate
ĠB ond
Ġ" /
Us ing
Ġdistrict s
ĠG ate
ĠB ir
r idge
ĠN az
ĠR s
bo ards
ĠG a
ĠRe agan
Ġinflu enced
1 000
ap y
Ġchalleng ed
Ġb arg
Ġfac ulty
ĠF if
Ġacqu ire
A c
Ġin sect
Ġinstr uments
Ġle af
th odox
M essage
Ġt ale
Ġthere by
Ġtra p
Ġstrong est
ĠMil itary
is ible
Ġ198 4
ethe less
Ġflex ible
Ġkill s
Ġfin ishing
ĠS ize
Ġredu ces
Ġep id
Ġorient ation
f ull
Ġtr ace
Ġl aser
Ġopp ose
Ġed iting
Ġmoment um
ä º
sh ow
V I
ĠL ad
Ġ198 5
Ġmurd ered
9 00
ut her
Ġprob ability
ĠP oll
Ġrel uct
ĠChe m
ĠMont real
Ġadequ ate
ĠPol and
ĠSher iff
um ph
Ġo k
Ġ 000
Ġ" [
Ġoper ators
ĠF er
Ġmod es
ĠE ve
Ġdiscipl ine
N ET
H and
Ġor al
ĠW E
em ail
J P
ĠPalestin ians
Ġhe nce
ĠL ess
Ġover l
d ig
Ġintim id
ĠCo al
Ġr anging
th a
Ġdist ant
Ġf ib
ĠInd ex
ĠW onder
ĠP el
hatt an
ĠH ug
Ã Ĺ
ra it
Ġwra pped
ĠR PG
Ġchemical s
ĠM oney
Ġfro zen
Ġind irect
ĠAgain st
E nd
Ġuncom fortable
ĠGall ery
ĠPost ed
Ø §
ond uct
Ġconsequ ence
Ġbit ter
Ġ198 7
p op
Ġcount less
ĠAl aska
ff ff
Ġdepart ure
Ġref und
ĠI an
i ated
Ġsee ks
Ġmechan ics
Ġjurisd iction
lyn n
Ġal ike
ĠH unt
ath on
Ġres olved
Ġc ache
Ġdist inction
d irect
Ġenc ount
ou b
be at
ĠCount ry
se arch
Ġcontin uous
Ġmod est
ĠR ail
th ood
1 30
B UG
Ġcrim inals
Ġindic ation
Ġencount ered
l ast
ĠW y
Ġide ology
ĠP DF
sec urity
] )
ĠJim my
ĠE N
Ġh iring
T em
Ġp ig
aun t
ĠCry stal
Ġpen alties
Ġcap ability
Ġp y
Ġproduct ive
Ġbal anced
ĠGe Force
cl ick
olit an
od s
Ġafter wards
Ġplay offs
ĠG ill
U ser
Ġback s
p ub
t ag
Ġabs urd
p iring
Ġc iting
Ġtr illion
Ġoblig ation
Ġmax im
ah oo
c f
um i
ĠAl pha
ĠN elson
Ġpursu ant
in itely
Ġf ract
ent ry
ber y
ĠTh or
Add ed
ĠD J
ĠG ene
Ġaw kward
St ud
Ġwal let
ĠDiv ine
ari os
Ġrele asing
Ġed ited
Ġaccompl ished
B est
Ġed ges
Ġplan es
Ġfeed ing
" },"
Ġdiscl osure
Ġgr ain
air y
o ons
ern and
V R
Ġreason ably
Ġdr um
Ġpart ial
Ġgraph ic
Ġunpre cedented
Ġadv ised
M icro
ĠAss ad
point s
sc ar
ĠZ one
tt es
Ġ7 00
v o
ĠH amp
Ġfix es
Ġca ution
Ġstr ings
Ġpan els
Ġle ak
Ġpr icing
row th
ĠEr ror
ĠS aints
f ix
Ġobserv ations
ĠA bs
Ġsuggest ion
ĠUkrain ian
Ġbar rier
Ġpain ted
B et
im ir
ĠS pect
p ot
orne ys
Ġcomp ound
Ġbe ars
ĠR ush
Ġlux ury
S um
Ġor bit
ĠMar c
Ġex empt
ĠTra il
ĠM O
ĠH ans
ĠWe apon
oc used
umin um
ĠJer ry
Ġb ust
ĠA G
ĠW iki
Ġend less
ĠV lad
ĠB ah
ĠR adeon
ke ys
ĠSur vey
ĠV iol
def ine
le an
Ġcomm od
Ġreven ues
Å į
Ġfurn iture
Ġcast ing
Ġdiplom atic
ĠPlay ers
ĠK illed
Ġmod ify
Ġinnov ative
ĠAb u
n or
Ġbond s
Ġcoach ing
M er
Ġmod ules
ĠPatri ots
Ġenh anced
Ġproceed ings
Ġteam mates
Ġ12 8
ard o
Ġcomprom ise
ĠM uch
Ġfle w
ĠEd ge
Ġunnecess ary
Ġdoct rine
re port
ĠOr lando
ĠProf ile
Ġplay off
friend ly
Ġcompl ain
ĠM C
ĠO pt
ĠG B
Ġbeat en
Ġg olf
Ġpl acement
B it
Ġnews letter
Ġ201 9
vis or
raw l
ĠiP ad
Ġact ed
Ġju ice
Ġdec ks
P N
su ccess
ĠH alf
Ġdele ted
Ġsec rets
Ġas ylum
M art
ĠAct iv
ĠGu y
ĠT s
Ġd ys
Ġassum ing
Ġman a
Ġsub ur
Ġ12 5
M edia
AR Y
r ide
c p
Ġdifficult ies
Ġcollect ing
Ġbank rupt
n on
Ġcomp osed
Ġvol t
Ġmilit ants
Ġ> >>
ĠM ormon
t or
Ġpartic les
ĠB art
ry ption
Ġad min
Ġsqu ee
VID IA
Ġcreat or
iam eter
ic ular
N BC
Ġgrab bed
Ġn odd
Ġr ated
Ġrot ation
Ġgr asp
Ġexcess ive
ĠE C
ĠWh it
Ġinvent ory
ault s
ĠF B
Ġe cosystem
Ġbill ions
Ġvent ure
n amed
Ġdef ender
out e
Inst ead
ir able
W ar
Ġassum ption
Ġb ite
Ġearth qu
t ail
sp ace
Ġgif ts
boy s
Ġinev itable
Ġstruct ural
Ġbenef icial
Ġcompe lling
h ole
erv ation
Ġco at
o j
inc arn
ĠY ears
Ġdetermin ing
Ġrhet oric
Ġbound aries
Ġwh ites
A nt
add y
) -
ra ham
eter min
Ġhar vest
ĠCon c
Ġlapt op
ĠM atch
Ġenjoy ing
cc a
oll ar
Ġtri ps
Ġadd iction
ĠS ak
Ġpow ered
Ġc ous
ĠRuss ians
ie re
Ġret rie
qu ality
Ġdiff er
Ġking dom
ĠL aur
ĠCap itol
Ġcon clusions
ĠAl tern
ĠN av
Ġtrans parent
B ER
G roup
ĠCom plete
Ġinf er
Ġint rig
Ġins ane
R O
oph ob
is en
qu al
Mich ael
Ġm useum
ĠP ope
Ġres et
r ative
f ive
Ġagg reg
itte es
osit ory
Ġcar b
ĠRec ord
Ġdec ides
ĠF ix
Ġexcept ions
ĠCommission er
un s
ĠEnvironment al
Ġlegend ary
ist ence
Ġtun nel
k m
Ġins ult
Ġt roll
Ġsh ake
Ġdet ention
qu es
ĠCh rome
ĠF iles
Ġsub t
Ġprospect s
Ġpro l
re nder
pro of
Ġperform ances
St r
Ġh ref
ern ame
Ġachieve ment
Ġf ut
F ull
ĠLe ban
go ogle
ãĥ Ī
amp a
May be
Ġproject ed
ĠE mb
Ġcol leg
Ġa wards
Ġâ Ķ
G old
ĠBl ake
ĠR aj
if ting
Ġp ending
Ġinst inct
Ġdevelop ments
Con nect
ĠM and
ĠW ITH
ĠPhilipp ines
prof ile
Ġalt ogether
ĠB und
ĠT D
oo oo
amp ed
ip h
Ġste am
Ġold est
Ġdet ection
ul pt
Ġ ç
ĠWay ne
200 6
f a
Ġcir cles
ĠF u
Ġdon ors
appropri ate
ĠDak ota
j amin
Ġmotiv ated
Ġpurch ases
ĠLouis iana
ĠS pl
Ġgl obe
Ġ10 5
z ip
c all
Ġdepart ments
Ġsustain able
10 5
ĠO P
if iers
Ġprevent ed
Ġinc omp
ĠComm ander
Ġdom inated
ĠÂ »
Ġinvest ed
Ġcomplex ity
Ġin cl
Ġens uring
Ġreal m
yn c
ĠInd ependent
r ained
ĠJ en
ĠFl ight
Ġat he
Ġspec ulation
ĠT E
oc ate
t ic
Ġpl aint
her ry
Ġto y
Ġ1 11
Ġpl ates
st atus
ĠIs a
Ġdev oted
C op
ĠE S
25 5
ur rency
M ain
Ġsl aves
Ġpe pper
Ġqu otes
Ġce iling
ĠF ish
Ġtrans formation
Ġfra ction
Ġadvant ages
Ġto ile
Ġstun ning
Ġmo ist
bre aking
s i
ĠL ocation
ĠMed ium
Ġtext s
Ġu gly
Ġb io
. âĢĶ
ĠB ased
Ġtr ains
ĠW ing
ĠAn cient
ĠRec ords
ĠH ope
Spe cial
ades h
ob i
[ /
Ġtempor arily
V er
h u
os er
Ġover night
Ġm amm
ĠTre asury
ĠV enezuel
ĠMeg a
Ġt ar
Ġexpect s
bl ack
or ph
\\ \\
Ġaccept ance
Ġrad ar
s is
Ġjun ior
Ġfram es
Ġobserv ation
ac ies
P ower
ĠAdv anced
M ag
olog ically
ĠMe chan
Ġsent ences
Ġanaly sts
augh ters
force ment
Ġv ague
Ġcl ause
Ġdirect ors
Ġeval uate
Ġcabin et
M att
ĠClass ic
A ng
Ġcl er
ĠB uck
Ġresear cher
Ġ16 0
Ġpoor ly
Ġexperien cing
ĠP ed
ĠMan hattan
Ġfre ed
Ġthem es
ad vant
Ġn in
Ġpra ise
10 4
ĠLib ya
b est
Ġtrust ed
Ġce ase
Ġd ign
D irect
Ġbomb ing
Ġm igration
ĠSci ences
Ġmunicip al
ĠA verage
Ġgl ory
Ġreve aling
Ġare na
Ġuncertain ty
Ġbattle field
ia o
G od
Ġc inem
ra pe
el le
ap ons
Ġlist ing
Ġwa ited
Ġsp otted
ke ley
ĠAud io
e or
ard ing
idd ing
ig ma
ĠN eg
Ġl one
Ġ ----
ex e
d eg
Ġtrans f
Ġwas h
Ġsl avery
Ġexpl oring
ĠW W
ats on
Ġen cl
l ies
ĠC reek
Ġwood en
Man ager
ĠBr and
um my
ĠAr thur
Ġbureau cr
Ġbl end
ar ians
F urther
Ġsupposed ly
Ġwind s
Ġ19 79
Ġgrav ity
Ġanalys es
ĠTra vel
ĠV eter
Ġd umb
Ġaltern ate
g al
Ġconsum ed
Ġeffect iveness
.' '
Ġpath s
ond a
L A
ĠStr ong
Ġen ables
Ġesc aped
Ġ" "
Ġ1 12
Ġ198 3
Ġsm iled
Ġtend ency
F ire
Ġp ars
ĠR oc
Ġl ake
Ġf itness
ĠA th
ĠH orn
Ġh ier
Ġimp ose
m other
Ġp ension
ic ut
bor ne
ic iary
. _
ĠS U
Ġpol ar
is y
eng u
itial ized
AT A
w rite
Ġexerc ises
ĠD iamond
ot ypes
Ġharm ful
on z
Ġprint ing
st ory
Ġexpert ise
ĠG er
Ġtraged y
ĠF ly
Ġd ivid
amp ire
st ock
M em
Ġre ign
Ġun ve
Ġam end
ĠProp het
Ġmut ual
ĠF ac
Ġrepl acing
H ar
ĠCirc uit
Ġthro at
ĠSh ot
Ġbatter ies
Ġto ll
Ġaddress ing
ĠMedic aid
Ġp upp
ĠN ar
ol k
Ġequ ity
M R
ĠHis pan
ĠL arge
m id
D ev
Ġexp ed
Ġdem o
ĠMarsh all
erg us
Ġf iber
Ġdiv orce
ĠCre ate
Ġsl ower
ĠPark er
ĠStud ent
ĠTr aining
Ret urn
ĠT ru
Ġc ub
ĠRe ached
Ġpan ic
Ġqu arters
Ġre ct
Ġtreat ing
Ġr ats
ĠChristian ity
ol er
Ġsac red
Ġdecl are
ul ative
et ing
Ġdeliver ing
est one
Ġt el
ĠL arry
Ġmet a
ac cept
art z
ĠRog er
hand ed
Ġhead er
Ġtra pped
ĠCent ury
Ġkn ocked
ĠOx ford
Ġsurviv ors
b ot
Ġdemon stration
Ġd irt
Ġass ists
OM E
ĠD raft
ortun ate
fol io
pe red
ust ers
g t
ĠL ock
Ġjud icial
ver ted
Ġsec ured
out ing
ĠBook s
Ġhost ing
Ġlif ted
l ength
Ġj er
Ġwhe els
ĠR ange
umbn ails
Ġdiagn osis
te ch
ĠStew art
ĠP ract
Ġnation wide
Ġde ar
Ġoblig ations
Ġgrow s
Ġmand atory
Ġsusp icious
! '
A pr
G reat
Ġmort gage
Ġprosecut or
Ġeditor ial
ĠK r
Ġprocess ed
ung le
Ġflex ibility
Ear lier
ĠC art
ĠS ug
Ġfoc uses
Ġstart up
Ġbre ach
ĠT ob
cy cle
ãĢ Į
ro se
Ġb izarre
ãĢ į
Ġveget ables
$ $
Ġret reat
osh i
ĠSh op
ĠG round
ĠSt op
ĠHawai i
ĠA y
Per haps
ĠBe aut
uff er
enn a
Ġproduct ivity
F ixed
cont rol
Ġabs ent
ĠCamp aign
G reen
Ġident ifying
Ġreg ret
Ġpromot ed
ĠSe ven
Ġer u
ne ath
aug hed
ĠP in
ĠL iving
C ost
om atic
me ga
ĠN ig
oc y
Ġin box
Ġem pire
Ġhor izont
Ġbr anches
Ġmet aph
Act ive
ed i
ĠFil m
ĠS omething
Ġmod s
inc ial
ĠOrig inal
G en
Ġspir its
Ġear ning
H ist
Ġr iders
Ġsacr ific
M T
ĠV A
ĠS alt
Ġoccup ation
ĠM i
Ġdis g
lic t
Ġn it
Ġn odes
e em
ĠP ier
Ġhat red
ps y
ãĥ ī
Ġthe ater
Ġsophistic ated
Ġdef ended
Ġbes ides
Ġthorough ly
ĠMedic are
Ġbl amed
arent ly
Ġcry ing
F OR
pri v
Ġsing ing
ĠI l
Ġc ute
o ided
olit ical
ĠNe uro
å ¤
Ġdon ation
ĠEag les
ĠG ive
T om
Ġsubstant ially
ĠLic ense
ĠJ a
Ġg rey
ĠAn imal
ĠE R
ĠU nd
Ġke en
Ġconclud e
ĠMississ ippi
Eng ine
ĠStud ios
P ress
o vers
ll ers
Ġ3 50
ĠR angers
Ġr ou
ert o
E p
iss a
iv an
Ġse al
ĠReg ist
dis play
Ġwe aken
u um
ĠComm ons
ĠS ay
Ġcult ures
Ġl aughed
Ġsl ip
Ġtreat ments
iz able
m art
ĠR ice
Ġbe ast
Ġob esity
ĠLa ure
ig a
Wh ich
hold er
Ġelder ly
Ġp ays
Ġcompl ained
Ġc rop
Ġpro c
Ġexplos ive
ĠF an
ĠAr senal
A uthor
ef ul
Ġme als
Ġ( -
id ays
Ġimag ination
Ġann ually
Ġm s
as ures
H ead
ik h
m atic
Ġboy friend
ĠCom puter
Ġb ump
Ġsur ge
ĠCra ig
ĠKir k
D el
medi ate
Ġscen arios
ĠM ut
ĠSt ream
Ġcompet itors
Ù Ħ
ĠStan ford
ĠRes ources
az ed
b age
Ġorgan is
ĠRe lease
Ġsepar ately
Ġha bits
Ġmeasure ments
ĠCl ose
Ġaccomp any
Ġg ly
Ġt ang
ĠR ou
Ġplug in
Ġcon vey
ĠChall enge
oot s
j an
Ġcur s
ĠRel ations
ke eper
Ġapproach ing
p ing
Spe aking
Ġarrang ement
ĠV I
are ttes
Ġaffect ing
Ġperm its
b ecause
Ġu seless
ĠH us
!! !!
Ġdestro ying
Un fortunately
Ġfasc inating
S em
Ġelect oral
Ġtrans parency
ĠCh aos
Ġvolunte er
Ġstatist ical
Ġactiv ated
ro x
We b
H E
ĠHamp shire
is ive
M ap
Ġtr ash
ĠLaw rence
st ick
C r
Ġr ings
EX T
Ġoper ational
op es
D oes
ĠEv ans
Ġwitness ed
P ort
Ġlaunch ing
ec onom
w ear
ĠPart icip
um m
cul es
ĠR AM
ĠT un
Ġass ured
Ġb inary
Ġbet ray
Ġexpl oration
ĠF el
Ġad mission
it ated
S y
Ġav oided
ĠSim ulator
Ġcelebr ated
ĠElect ric
¥ ŀ
Ġcl uster
itzer land
he alth
L ine
ĠN ash
at on
Ġsp are
Ġenter prise
ĠD IS
clud es
Ġfl ights
Ġreg ards
ĠÃ Ĺ
h alf
Ġtr ucks
Ġcontact s
Ġunc ons
ĠCl imate
Ġimm ense
N EW
oc c
ect ive
Ġemb od
Ġpat rol
Ġbes ide
Ġv iable
Ġcre ep
Ġtrig gered
ver ning
Ġcompar able
q l
Ġg aining
ass es
Ġ( );
ĠG rey
ĠM LS
s ized
Ġpros per
" ?
Ġpoll ing
Ġsh ar
ĠR C
Ġfire arm
or ient
Ġf ence
Ġvari ations
g iving
ĠP i
osp el
Ġpled ge
Ġc ure
Ġsp y
Ġviol ated
Ġr ushed
Ġstro ke
ĠBl og
sel s
ĠE c
,' '
Ġp ale
ĠColl ins
ter ror
ĠCanad ians
Ġt une
Ġlabor atory
Ġn ons
t arian
Ġdis ability
ĠG am
Ġsing er
al g
ĠSen ior
Ġtrad ed
ĠWar rior
Ġinf ring
ĠFrank lin
Ġstr ain
ĠSwed ish
Ġsevent h
ĠB enn
ĠT ell
Ġsynd rome
Ġwond ered
id en
++ ++
ig o
Ġpur ple
Ġjournal ism
Ġreb el
Ġf u
bl og
Ġinv ite
ren cies
ĠCont act
Is rael
ĠCont ent
Ġche er
Ġbed room
ĠEngine ering
ĠQue ens
Ġd well
ĠPlay Station
ĠD im
ĠCol on
l r
Ġoper ates
Ġmotiv ation
US A
ast ered
C ore
ĠTr uth
ol o
OS E
ĠMem ory
Ġpred ec
Ġan arch
Ġ19 20
ĠY am
Ã ¨
b id
Ġgr ateful
Ġexc itement
Ġtre asure
Ġlong est
ct ive
Ġdes erves
Ġreserv es
Ġcop s
ĠOtt awa
ĠEgypt ian
ank ed
Ġart if
Ġhypot hesis
: /
Ġpurch asing
Ġlove ly
H P
Ġdiv ide
Ġstrict ly
Ġquestion ing
Ġtaxp ayers
ĠJ oy
Ġroll s
ĠHe avy
Ġp orts
Ġmag netic
Ġinf lamm
Ġbr ush
t ics
â ĪĴ
Ġbott les
pp y
Ġp add
ãĤ ¯
m illion
Ġdevast ating
Ġcomp iled
Ġmed ication
Ġtw elve
ĠPer ry
Sp ace
im b
y our
Ġle aked
ĠT ar
Ġun ity
Ġinfect ed
Ġtravel ed
ID E
ĠMc Donald
t xt
ĠPr inc
Ġinter ven
ĠTai wan
ĠP ow
Ġbe aring
ĠTh read
Ġz ones
iz ards
un ks
Ch apter
ll or
ĠÂ ·
Ġw ounds
Ġdisc retion
Ġsucceed ed
ik ing
Ġicon ic
C all
Ġscreen ing
ĠM is
ict s
Ġmin isters
Ġsepar ation
Pl ayer
Ġb ip
Ġbel oved
Ġcount ing
ĠE ye
ar ound
ing ing
Ġtable t
Ġoff ence
in ance
h ave
ĠInf o
ĠNin ja
Ġprotect ive
ĠC ass
M ac
ĠQual ity
N orth
Ġ ic
ĠCub a
ĠChron icle
ĠPro perty
Ġfast est
ot os
ĠG erm
OW N
Ġbo om
ĠStan ley
ergus on
Ġcle ver
Ġent ers
m ode
ter ior
ĠS ens
Ġlin ear
AR K
Ġcomp aring
Ġpure ly
Ġsaf er
ĠPot ter
Ġc ups
R T
Ġgl uc
Ġatt ributed
Ġdu pl
ĠP ap
Ġprec ious
Ġp a
iction ary
ĠT ig
ĠTo o
ol utions
st an
Ġrob ots
Ġlob b
Ġstat ute
Ġprevent ion
w estern
16 0
ĠAct ive
ĠMar ia
h al
N one
ell ar
ĠK B
ĠPart ners
ĠSing le
ĠFollow ing
ang o
ac ious
Ġth ou
Ġk g
Ġinflu ential
ĠFriend s
S ur
ain ted
Ġfor ums
Ġst arter
Ġcitizens hip
ĠE lection
on ge
ot ation
os ph
;; ;;
ut ical
p ur
ere n
Ġaccus ations
bit ious
ab bit
ĠOr d
Post ed
ir k
Ġsens itivity
ic he
ĠAm y
ĠF ab
Ġsum mit
Ġped est
Ġrub ber
Ġagric ultural
Ġcan cel
A E
Ġin aug
Ġcont am
Ġfirm ly
i w
st age
ĠK an
Ġt ier
Ġinv ention
Ġtransl ated
ĠR ules
B ox
Tw itter
ID S
Ġp izza
Ġdeb ug
ĠD rop
v s
Ġh orses
b ig
Ġb oring
Ġh ood
ĠMcC ain
at ched
ĠBro s
Ġsk ip
Ġess ay
st at
ĠLeg ends
Ġam munition
au c
Ġshoot er
Ġun h
Ġsuppl ied
Ġgener ic
ĠS K
ib an
yr ics
Ġ25 5
Ġclim bing
Form er
Ġfl ip
Ġjump ing
Ġfrust ration
ĠTer ry
Ġneighborhood s
Ġmed ian
be an
Ġbr ains
Follow ing
Ġsh aped
Ġdraw s
Ġal tered
J ack
Ġrecip es
Ġsk illed
we alth
ach i
e lection
Ġbehavi ors
de als
ĠU ntil
F e
Ġdecl aration
mar ks
ĠBet ween
cel ona
Ġres on
Ġbub ble
Am ong
Ġim perial
G S
Ġfemin ist
200 5
ĠK yle
Ġaccount ing
ĠTe le
ĠT yr
Ġconnect ing
Ġre hab
ĠP red
s im
Ġmeant ime
Ġphys ician
M W
ĠCamp bell
ĠBr andon
Ġcontribut ing
ĠR ule
ĠWe ight
ĠN ap
Ġinter active
Ġv ag
Ġhel met
ĠCom b
f our
Ġsh ipped
Ġcomple ting
ĠP D
PD ATE
Ġspread ing
Ġsc ary
erv ing
ĠG as
Ġfr ank
s chool
Ġrom antic
Ġstab il
R ob
Ġaccur ately
Ġac ute
ĠH ann
Ġsymbol s
Ġcivil ization
ĠA W
Ġlight ning
Ġcons iders
Ġven ue
Ġ ×
Ġo ven
ĠS F
h is
Ġn u
ĠLear n
Ġpe oples
Ġst d
Ġsle e
Ġs lic
ĠStat istics
Ġcor ners
ĠB aker
Ġ: )
ment ation
ol ver
Ġlaugh ing
ĠT odd
ond e
ĠH ills
Ġn uts
ĠW oman
pl ane
Ġl iver
ĠIn side
S orry
Ġagre es
Ġfund ament
ĠF isher
Ġa uction
Ġthread s
gl as
ĠBas ic
ĠN at
Ġlack ing
Ġceleb ration
j u
Ġs illy
E uro
Ġt att
ight y
cont rolled
T est
ĠSing h
Ġr age
Ġrh yth
o ffic
ĠPh antom
Ġhead lines
Ġrespond ing
ĠMor ning
Ġvit amin
Ġboot s
ĠS ite
al in
p i
Ġvir al
ĠU C
D ER
ĠSe x
Ġst ocks
c urrent
Ġch urches
ĠR are
ĠMur phy
Ġden ial
ĠG aming
Ġtou g
Ġn ick
Ġm akers
ĠRon ald
Ġgener ous
ĠD oc
ĠMor ris
Ġtransform ed
ĠN ormal
Ġ10 4
ĠKick starter
ĠUp on
On line
ĠI RS
Ġw rap
Ġl oving
Ġarri ves
ĠD ue
Ġhe ter
ĠM ade
Ġrent al
Ġbelong s
Ġatt orneys
Ġcro ps
Ġmat ched
ul um
ol ine
10 9
Ġdis par
Ġbuy ers
ĠCam bridge
Ġeth ics
rou ps
Ġjust ified
Ġmarg inal
Ġrespect ed
win ning
Ġnodd ed
ĠSer ge
ĠForm er
C raft
######## ########
ĠWar ner
Ġd ash
et e
Ġent ert
ĠE scape
out heast
Ġkn ees
ĠB omb
Ġr ug
P ass
Ġatt itudes
go vernment
ĠPri or
Ġqual ities
Ġnot ification
ĠPh one
l ie
Ġanticip ated
ĠCom bat
ĠBar ry
Ġ198 2
Us ers
on er
Ġcomput ing
ĠConnect icut
Ġless er
Ġpe ers
ĠC u
Ġtechn ically
Ġsub mission
ĠUn iversal
Ġman ually
our ge
Ġrespond ents
ĠB TC
ĠH ost
Ġf are
ĠB ird
Ġrece ipt
al so
Ġj ack
Ġagric ulture
Ġsk ull
Ġ! =
Ġpass ive
ĠC I
Ġsoc ieties
Ġremind ed
Ġinter ference
B uy
Ġâ ľ
g on
Ġscrut iny
ĠW itch
Ġconduct ing
Ġ ãĥ
Ġexch anges
ĠMit chell
Ġinhab it
Ġtw ist
B D
Ġwhere ver
group on
Ġj okes
ĠBen jamin
ĠR andom
fr ame
ĠL ions
Ġhighlight ed
ĠArk ansas
E nt
Ġp ile
Ġpre lim
g s
mind ed
Ġfel ony
ĠG A
ĠL uck
Ġpract ically
ĠB os
Ġact ress
D am
ĠB ou
Ġvis a
Ġembed ded
Ġhy brid
Ġear liest
Ġsoon er
s ocial
ĠH A
Ġste ep
Ġdis advant
Ġexplo it
ĠE gg
ĠUlt ra
Ġnecess ity
L ocal
ie ge
Ġd ated
Ġmass es
Ġsubsc ription
pl ess
Ġan onym
Ġpresum ably
Bl ue
The ir
asket ball
ĠPhil ip
Ġcom ed
load ed
r ane
Ġref lection
Ch ina
Ġext ends
Ġform ing
Ġund ers
200 1
Ġgr at
Ġconcent rations
Ġins ulin
Ġsec ular
Ġwh ilst
Ġwin ners
Ad vertisements
Ġdeliber ately
ĠWork ing
Ġs ink
et ics
d ale
Ġmand ate
Ġg ram
Ġvac ation
Ġwarn ings
ri pp
ĠTH AT
Ġcomment ary
Ġint u
Ġa est
Ġreason ing
Ġbreak down
ĠZ ombie
Ġ-- >
ĠPolit ical
c ott
Ġthr ust
Ġtechn ological
Ġdec iding
Ġtraff icking
L ong
W elcome
pr ising
ĠCommun ications
Ġend ors
Ġsw ift
Ġmetab ol
co ins
res a
ĠHT TP
Ġen roll
ĠH appy
us r
int age
Ġ[ "
u ably
ĠM aterial
Ġrepe al
Se pt
k h
ĠMod i
Ġunder neath
ĠI L
sh ore
Ġdiagn osed
ace utical
Ġsh ower
au x
ĠSw itch
ĠStre ngth
Ġj ihad
n ational
Ġtra uma
uss y
on i
Ġcons olid
Ġcal ories
ĠF lynn
ag ged
16 8
ĠP ink
Ġfulf ill
Ġch ains
Ġnot ably
ĠA V
L ife
ĠCh uck
m us
ĠUr ban
ĠH end
Ġdep osit
ĠS ad
Ġaff air
OR K
ie val
ĠF DA
Ġt rop
ĠOver all
Ġvirt ue
Ġsatisf action
au nd
Ġl un
ĠSw itzerland
ĠOper ation
pro cess
Ġsh ook
Ġcount ies
le ased
ĠCharl otte
1 12
Ġtrans cript
Ġre dd
p ush
ĠHe y
ĠAn alysis
[ "
Ġaltern atives
ard less
Ġele ph
Ġpre jud
ĠLe af
H aving
ĠH ub
Ġexpress ions
ĠVol ume
Ġshock ing
ĠRed s
Ġread ily
Ġplan ets
ad ata
Ġcollaps ed
ĠMad rid
Ġir rit
i pper
ĠEn c
ĠW ire
Ġbu zz
ĠG P
ash a
Ġaccident ally
ur u
Ġfrust rated
ĠS A
Ġhung ry
ĠH uff
Ġlab els
ant o
ĠE P
Ġbar riers
) |
ĠBer keley
ĠJ ets
Ġp airs
ĠL an
J ames
ĠB ear
Ġhum or
ĠLiber ty
Ġmagn itude
Ġag ing
ĠM ason
Ġfriends hip
umb ling
Ġemer ge
Ġnewsp apers
Ġam bitious
ĠRich ards
atern al
Ġ198 1
Ġcook ies
Ġsc ulpt
Ġpur suit
L ocation
Ġscript s
p c
Ġarrang ements
Ġd iameter
Ġl oses
am ation
Ġl iqu
ĠJ ake
aret te
Ġunderstand s
ĠZ en
v m
Ġappro ve
Ġw ip
Ġult ra
Ġint end
ĠD I
asc ular
Ġst ays
ĠK or
ĠK l
Ġinvest ing
L a
Ġbelie ving
b ad
m outh
Ġtaxp ayer
ãĥ ĥ
ĠQue bec
Ġl ap
ĠSw iss
d rop
Ġdr ain
ir i
et c
ft en
ĠN ex
Ġst raw
Ġscream ing
Ġcount ed
Ġdam aging
Ġamb assador
cent ury
Ġpro x
Ġarrest s
u v
il ateral
ĠCh arg
Ġpresc ribed
Ġindepend ently
Ġf ierce
ĠB aby
Ġb rave
Ġsu its
= >
Ġbas eline
ĠR ate
Ġis lands
Ġ( (
g reen
ix els
Ġname ly
ĠVill age
th an
am y
V ersion
g mail
ential s
ĠS ud
ĠMel bourne
Ġarri ving
Ġquant um
e ff
rop olitan
T ri
Ġfun eral
ĠI R
ÃĥÃĤÃĥÃĤÃĥÃĤÃĥÃĤ ÃĥÃĤÃĥÃĤÃĥÃĤÃĥÃĤ
ĠC ob
it ably
Ġt urb
Ġcomb o
Re view
Ġdeploy ment
u ity
ĠB ott
Ġinv isible
Ġrender ing
Ġunl ocked
Ġa qu
ĠVlad imir
Ġp ad
ĠBr ain
ĠLeg acy
dr agon
ĠKurd ish
Ġsound ed
Ġdet ained
ĠD M
g ary
Ġd aughters
Ġdistur bing
uk a
ĠPar ad
Ġt ast
Ġunf ortunate
Ġu l
em in
Ġattend ance
tr l
Ġpar ks
ĠMem orial
ĠAl ice
oth y
gu ard
ĠD ise
ĠSh an
ĠFor um
R ich
Ġshif ted
ue z
Ġl ighter
ĠMag n
Ġc od
S ch
ham mad
P ub
3 50
ĠP okemon
Ġprot otype
Ġun re
B ase
ĠStud ents
ĠRep ly
ĠCommun ist
Ġg au
ĠTy ler
I Z
Ġparticip ated
Ġsup rem
ĠDet ails
Ġvessel s
ro d
Ġt ribe
ke ep
Ġassum ptions
Ġp ound
Ġcr ude
ĠAv ailable
Ġswim ming
Ġin clusion
Ġadv ances
c ulation
Ġconserv ation
Ġover d
ĠBuff alo
Art icle
ed ge
Ġaw a
ĠMad ison
Ġsid ew
Ġcat ast
ĠK rist
uc le
ĠHigh way
ĠTer ror
Ġactiv ation
Ġuncons cious
ĠSat an
ĠSus an
ill ery
Ġarr anged
i op
Ġrum ors
ur ring
th ink
ĠKe ith
ĠK ind
Ġavoid ing
by n
n ut
ĠSpe aker
r us
n ames
Ġgu ilt
ĠOlymp ics
Ġsa il
ĠM es
lev ant
ĠColumb us
a ft
C ity
S outh
ĠHar vey
ĠP un
S everal
Ġment ally
Ġimp ress
m ount
ĠUb untu
âĢĶâĢĶâĢĶâĢĶ âĢĶâĢĶâĢĶâĢĶ
ĠSuper man
ĠMP s
Ġintent ions
ĠR acing
Ġlike lihood
Ġ2 40
T otal
Ġto ys
ĠW atson
Ġur ge
L ear
ĠP aper
Ġoccur ring
ĠB eng
ĠC ert
Ġst ones
T im
ĠTw in
z b
ĠD ynam
Ġpolit ician
k ens
ĠEnter prise
UT ERS
Ġab ol
Ġref resh
Ġarbit rary
pe ction
Ġtrou bles
Ġ} );
t v
Ġpil ots
Ġdist ribute
Ġaud it
Ġp ause
orig inal
Ġr ivals
Â £
F ig
T L
ab il
ry ing
L in
ion ed
l on
Ġf ancy
Ġcr ashed
Ġt ract
Ġshe d
Ġcons ume
B ased
down load
in it
Ġvolt age
Int rodu
Ġcondem ned
ĠFin ance
res pect
Ġex cluded
Ġestablish ing
her ic
Ġher itage
Ġspect acular
Ġun st
ĠSnow den
ĠL ane
S an
Ġprotect ions
st ruction
inc inn
Ġmac ro
C ustom
ios ity
Ġes p
Ġfunction ing
Ġm ush
Ġp uzzle
Ġeth ical
M al
Ġgo verning
ĠF erguson
Ġrest ored
Ġst ressed
ĠCoun ter
ĠK as
cl ip
AN S
Ġse iz
U K
by ss
old own
ap i
Ġperman ently
oun ters
W est
Th rough
L ight
at oes
Ġne at
Ġc ord
ure r
Ġsevere ly
ĠA ven
Ġinter rog
Ġtri ple
G iven
N umber
Ġar ise
Ġs her
pl ant
Ġfl ower
ĠC ou
Ġat e
Ġnew er
b ul
Ġmean while
ĠL air
Ġadjust ment
ĠCop yright
Ġd ivers
i ological
Ġgam ers
o at
Ġhistor ically
Ġanal og
Ġlong time
Ġpres cription
ĠM ist
ĠHy per
ĠM aine
ĠDe ity
Ġmulti pl
ĠRe incarn
ĠH yd
ĠP ic
S il
r ants
ĠC ris
. ;
( {
epend ence
Ġrec y
ate ur
Ġqu ad
Ġgl ob
Ġcon ced
te am
Ġcapital ist
ĠL ot
Ġroy al
ĠCy ber
Ġblack s
met ic
ri v
ĠD anny
Ġsp o
ĠR O
Ġanim ated
rypt ed
ĠDep uty
Ġrend ered
F E
Ġstre ak
Ġcloud s
ĠDou g
~~~~ ~~~~
Ġdisc our
ĠVe h
Ġpsych ology
ĠJ ourney
Ġcry stal
ĠFro st
Ġsuspic ion
Ġrel ate
or us
ĠC rypt
ĠN VIDIA
com ed
ut ing
incinn ati
Ġvulner ability
ost ic
Ġisol ation
Ġcool ing
ĠCoal ition
Ġ1 19
F our
ĠDe al
Ġâ ī
se mble
ram ent
ĠBar celona
Ġ10 2
Ġcoc aine
ocaly pse
F eb
ogen ic
Ġmut ation
Ġcrypt oc
ĠK el
ĠG it
a is
Ġs isters
AN K
Ġactiv ate
T er
Ġd read
yl on
Ġprop ri
A ust
ĠDef ault
Ġout door
Ġshe er
ce ive
Ġg ently
Ð ¾
Pro gram
Ġâ ĨĴ
Ġve gan
ĠCr us
Ġrespons ibilities
ĠH R
OL D
Ġprev ents
Ġst iff
ĠW ere
Ġathlet ic
ĠSc ore
Ġ) :
Ġcolumn s
ĠL oc
av ailable
ĠF ram
ĠS essions
Ġcompan ion
Ġpack s
14 0
ĠKn ights
Ġf art
Ġstream s
Ġsh ore
Ġapp eals
ĠPer formance
h aul
ĠSt ra
ĠN ag
10 3
ĠTrans portation
B B
E v
z an
P ublic
Ġtw in
uls ion
M ult
Ġelect ro
Ġstat ue
ation ally
ĠN ort
Ġins pection
/ *
ig ue
Ġcomp assion
ĠT ales
ĠSte in
ĠSc reen
ĠB ug
ĠL ion
g irl
Ġwithdraw al
Ġobject ives
Ġblood y
Ġprelim inary
Ġj acket
Ġdim ensions
ĠC ool
ĠOcc up
Ġw reck
Ġdoub led
ank ing
Ġ19 75
Ġglass es
ĠW ang
pro v
P ath
connect ed
ĠMult i
ĠNor way
agon ist
Ġfe ared
Ġtouch ing
Ġarg uably
Â¯Â¯Â¯Â¯ Â¯Â¯Â¯Â¯
ĠNC AA
che m
Ġsp at
ĠW WE
ĠC el
ig ger
Ġattack er
ĠJo in
ob ject
ett a
Ġelim inated
d et
Ġdest ruct
ĠLuc as
ct uary
18 0
ĠBr ady
ĠBl ues
B ay
au kee
Ġtim eline
Ġdeleg ates
w ritten
uff icient
Ġsh apes
Cop yright
ou ble
serv ice
Ġp ione
Ġcolleg es
Ġrow s
Ġsp ite
Ġassess ed
3 60
Ġle ase
Ġconfident ial
ck er
ĠMan ning
ĠV oice
Ġse aled
Ġcalcul ate
N O
ĠAss istant
Ġteen ager
ul ent
ather ine
Ġm ock
Ġd iamond
Ġf est
Ġsw itched
Ġres ume
ĠPu erto
Ġl anes
ir ation
ĠSimilar ly
Ġro d
ĠS el
ĠPal ace
ĠLim ited
e ous
Ġvar iant
Ġw ard
Ġ) )
Sh ow
OO K
A lex
ĠN ep
br is
ĠWik ipedia
Ġexcept ional
Ġman ages
ĠD raw
Ag ain
Ġco pper
ut t
Ġex ports
Ġport folio
Ġelev ated
R ated
ĠOther wise
ĠT act
ĠShe l
ĠT X
" âĢĶ
Ġres ur
ĠW a
ven ant
Ġmon etary
pe ople
E mail
Ġfif ty
ĠS weet
ĠMalays ia
Ġconf using
ĠR io
ud a
uten ant
" );
Ġpra ised
Ġvol umes
t urn
Ġm ature
Ġnon profit
Ġpassion ate
ĠPriv ate
Ġ10 3
Ġdesc end
ç ¥ŀ
uff y
head ed
Whe ther
ri en
ze ch
be it
Ġch rom
ĠMc M
Ġd ancing
Ġe leg
ĠNot iced
11 5
Ġadvoc acy
ENT S
amb ling
ĠMin or
ĠF inn
Ġprior ities
Ġthere of
ĠSt age
ĠRog ers
Ġsubst itute
ĠJ ar
ĠJeff erson
Ġlight ly
10 2
ĠL isa
u its
ys ical
Ġshif ts
Ġd rones
Ġwork place
Ġres id
ens ed
ah n
Ġpref erences
ser ver
Ġdeb ates
d oc
ĠGod s
Ġhelicop ter
Ġhon our
Ġconsider ably
ed ed
ĠF emale
ĠAn ne
Ġre un
ĠF ace
ĠHall ow
ĠBud get
Ġcondem n
Ġt ender
Pro f
ocr atic
ĠTurn er
ĠAg ric
Ġ19 76
Ġa pt
d isc
ĠF ighter
ĠA ur
Ġgar bage
in put
ĠK arl
ĠOl iver
ĠL anguage
k n
N on
ĠCl ar
Ġtrad itions
Ġad vertisement
ĠS or
Ġarch ive
Ġvill ages
7 50
Ġimplement ing
w aukee
Ġdiet ary
Ġswitch ing
Rep ublic
Ġvel ocity
Ġc it
ĠA wards
Ġfin ancing
Ġlast ed
) ]
Ġrem inder
P erson
Ġprec ision
Ġdesign ers
ĠF ried
ĠB order
Ġtr agic
Ġw ield
Ġiniti atives
ĠT ank
w er
Ġjo ins
R o
in ery
Ġar row
Ġgener ating
found er
Ġsear ches
Ġrandom ly
A ccess
Ġb atch
Ġp osed
l at
Ġpursu ing
as a
Ġtest ified
form ing
ĠSh ar
w iki
ĠE ither
S ometimes
Ġsen ators
ĠJohn ny
ĠTal iban
ĠG PS
":" /
ãģ® å
Ġanaly zed
ĠRub io
ĠMove ment
op ard
ii i
St and
f ight
Ġign oring
i ang
ĠG N
so ever
ĠST AT
Ġref using
Ġswe at
Ġb ay
P ORT
ir med
ak y
Ġdis pro
Ġlabel ed
Ġ10 8
H ello
Ġple asant
ab a
Ġtri umph
Ġab oard
Ġinc om
ĠC row
le tt
Ġfol k
Ġch ase
` `
ĠBr us
Ġte ens
c ue
Ġter rain
h yd
il ight
OR Y
Su pport
ew s
ll i
rain ts
ĠC and
Ġab used
ach ment
l arg
B as
ĠC ancer
Ġ19 78
Ġsupp orter
ac cess
ĠTer min
ĠT ampa
ĠAN Y
Ġnew est
ĠCrim inal
ed u
Ġ19 30
Ġadm its
Ġend e
Ġfail ures
ur ate
ful ness
cy cl
ĠSub ject
Ġinf inite
th ree
W A
p it
ĠInst all
R ad
ili ation
G M
Ġcontin ent
Ġaccommod ate
ĠCl ay
Ġp up
ĠF unction
Ġham mer
ĠAlbert a
Ġrev ised
Ġminor ities
Ġmeasure ment
Con nell
Ġdis able
ĠM ix
In cre
Ġfor k
ĠR osen
Ġimpl ies
umb lr
AN G
Ġprote ins
Ġagg ression
Ġfacilit ate
S N
Ġilleg ally
u er
Ġacad em
Ġp uzz
ĠSh ift
p ay
oll o
Ġaud iences
B uild
Ġno ble
Ġsynt ax
â ĺħ
Ġbe am
ĠB ed
ĠA ld
Ġorig ins
v ideo
Ġ19 77
ĠAss ault
Ġgar age
Te am
Ġver dict
Ġd war
ĠVirt ual
e vent
Ke ep
Ġsent iment
Ġwild life
sh irt
Ġb urg
Ġrecommend ation
rep resent
Ġgall ery
own ers
Ġsch olar
Ġconven ience
ĠSw ift
Ġconv inc
C ap
Ġwar fare
ĠVis ual
Ġconst itute
Ġab ort
ĠWe ather
ĠLook ing
ĠH em
Ġmart ial
Ġinc oming
et ition
Ġtoler ance
ĠCre ated
Ġfl ows
ĠE lder
Ġsoul s
Ġf oul
ĠP ain
ĠC AN
Ġ2 20
b c
he nd
Ġgen ius
R eal
ĠW r
omet er
p ad
Ġlim iting
ĠS i
ĠL ore
ĠAd ventures
Ġvar ied
D isc
f in
ĠPerson al
Ch ris
Ġinv ented
Ġd ive
ĠR ise
Ġo z
ĠCom ics
Ġexp ose
ĠRe b
let ters
s ite
im ated
Ġh acking
Ġeduc ated
ĠNob ody
Ġdep ri
Ġincent ive
ãĤ ·
Ġovers ight
Ġtrib es
ĠBelg ium
Ġlicens ing
our t
Produ ct
ah l
ĠG em
Ġspecial ist
Ġc ra
ann ers
ĠCor byn
Ġ19 73
RE AD
Ġsum mar
Ġover look
ĠApp lication
Ġin appropriate
Ġdownload ed
Q ue
ĠB ears
Ġth umb
ĠChar acter
ĠReincarn ated
ĠS id
Ġdemonstr ates
s ky
ĠBloom berg
ĠAr ray
ĠRes ults
ĠFour th
ĠED T
ĠO scar
c end
Ġ10 6
ĠN ULL
ĠH ERE
m atch
ĠBr un
Ġgluc ose
ie g
eg u
Ġcert ified
Ġrel ie
Ġhuman itarian
Ġpr ayers
K ing
Ġn an
h ou
10 8
ul u
Ġrenew able
Ġdistingu ish
Ġd ense
ĠV ent
ĠPack age
ĠB oss
Ġedit ors
Ġm igr
T ra
ĠPet ers
ĠAr ctic
200 4
ĠC ape
Ġloc ally
Ġlast ing
Ġhand y
. ).
P an
ĠR ES
Ind ex
Ġt ensions
Ġformer ly
Ġide ological
Ġsens ors
Ġdeal ers
Ġdef ines
S k
Ġproceed s
Ġpro xy
az ines
ĠB ash
ĠP ad
ĠC raft
eal ous
Ġshe ets
omet ry
J une
cl ock
T T
ĠThe atre
ĠB uzz
Ġch apters
Ġmill enn
Ġd ough
ĠCongress ional
Ġimag ined
av ior
Ġclin ic
Ġ19 45
Ġhold er
ro ot
oles ter
Ġrest art
B N
ĠHam as
ĠJ ob
Ġor b
Ġr am
Ġdiscl ose
Ġtransl ate
Ġimm igrant
Ġannoy ing
Ġtreat y
an ium
ĠTe a
ĠLeg ion
Ġcrowd s
ĠB ec
ĠA er
oh yd
B ro
Look ing
Ġl bs
Ġagg ress
Ġse am
Ġinter cept
ĠM I
mer cial
act iv
ĠC it
Ġdim ension
Ġconsist ency
Ġr ushing
ĠDou glas
Ġtr im
Inst all
ick er
Ġsh y
10 6
Ġment ions
pe lled
ĠT ak
c ost
Ġclass room
Ġfort une
dri ven
Ġun le
ĠWhe el
Ġinvest or
ĠM asters
k it
Ġassoci ations
ĠEv olution
op ing
us cript
Ġprov incial
ĠWal ter
av i
S O
Ġun limited
Eng lish
ĠC ards
ĠEb ola
ne red
Ġreven ge
Ġout right
um per
Ġf itting
ĠSol id
Ġform ally
Ġproblem atic
Ġhaz ard
Ġenc ryption
Ġstraight forward
ĠA K
Ġp se
ĠOr b
ĠCh amber
ĠM ak
Cont ents
Ġloyal ty
Ġl yrics
ĠSy m
Ġwel comed
Ġcook ed
Ġmon op
Ġn urse
Ġmis leading
Ġe ternal
Ġshif ting
Ġ+ =
V is
Ġinst itutional
ill ary
Ġp ant
VER T
ĠA CC
ĠEn h
Ġinc on
ĠRE UTERS
Ġdon ated
âĢ¦âĢ¦ âĢ¦âĢ¦
In tern
Ġexhib it
Ġt ire
ĠR ic
ĠCh ampion
ĠMu hammad
N ING
ĠSoc cer
Ġmob ility
Ġvary ing
ĠM ovie
Ġl ord
o ak
F ield
Ġve ctor
us ions
Ġsc rap
Ġen abling
m ake
T or
. *
| |
ĠWe bsite
ĠN PC
Ġsocial ist
ĠBill y
ĠAdd itional
Ġc argo
Ġfar ms
ĠSo on
ĠPri ze
Ġmid night
Ġ9 00
se en
ĠSp ot
Ġshe ep
Ġspons ored
ĠH i
ĠJ ump
Ġ19 67
Micro soft
ĠAg ent
Ġch arts
d ir
Ġadj acent
Ġtr icks
Ġman ga
Ġex agger
/ >
foot ball
ĠF CC
G C
ĠT ier
and ra
OU ND
% ),
Ġfru its
V C
ĠA A
R ober
Ġmid st
â Ĺ
ank a
Ġlegisl ature
ĠNe il
Ġtour ists
" "
ĠWar ning
ĠNever theless
ĠOffic ial
ĠWh atever
Ġm old
Ġdraft ed
Ġsubst ances
Ġbre ed
Ġt ags
ĠT ask
Ġver b
Ġmanufact ured
com ments
ĠPol ish
Pro v
Ġdetermin es
Ob ama
k ers
Ġutter ly
Ġse ct
sc he
ĠG ates
ĠCh ap
Ġal uminum
Ġz ombie
ĠT ouch
ĠU P
Ġsatisf y
Ġpred omin
asc ript
Ġelabor ate
Ġ19 68
Ġmeas uring
ĠV ari
any ahu
Ġs ir
ul ates
id ges
ick ets
ĠSp encer
T M
oub ted
Ġpre y
Ġinstall ing
ĠC ab
re ed
re ated
Su pp
Ġwr ist
ĠK erry
10 7
ĠK le
ĠR achel
Ġc otton
ĠA RE
ĠE le
Cont rol
Ġload s
ĠD od
an as
b one
Ġclass ical
ĠReg ional
ĠInt eg
V M
Ġdes ires
Ġaut ism
support ed
ĠM essage
Ġcomp act
writ er
Ġ10 9
ĠHur ricane
c ision
Ġcy cles
Ġdr ill
Ġcolle ague
Ġm aker
G erman
Ġmist aken
S un
ĠG ay
Ġwhat soever
Ġsell s
ĠA irl
l iv
ĠO ption
Ġsol ved
Ġse ctors
Ġhorizont al
Ġequ ation
ĠSk ill
ĠB io
g ement
ĠSn ap
ĠLeg al
Ġtradem ark
Ġmake up
Ġassemb led
Ġsa ves
ĠHallow een
ĠVer mont
ĠFR OM
Ġfar ming
ĠP odcast
accept able
ĠHig her
Ġas leep
ull ivan
Ġrefere n
ĠLe v
Ġbul lets
ok o
H C
Ġst airs
Ġmain tains
ĠL ower
ĠV i
Ġmar ine
Ġac res
Ġcoordin ator
ĠJ oh
Ġcounterpart s
ĠBrother s
Ġind ict
b ra
Ġch unk
Ġc ents
H ome
ĠMon th
Ġaccording ly
if les
ĠGerm ans
ĠSy n
H ub
Ġey eb
âĶĢâĶĢ âĶĢâĶĢ
Ġr anges
ĠHoll and
ĠRob ot
f c
M ike
Ġpl asma
Ġsw ap
Ġath lete
ĠR ams
,' "
Ġinfect ions
Ġcor rid
Ġv ib
Ġpat ches
Ġtradition ally
Ġrevel ation
Ġswe ep
Ġgl ance
Ġin ex
200 3
ĠR aw
work ing
os ures
ĠD at
ĠLyn ch
Ġle verage
ĠRe id
Ġcorrel ation
ian ces
av ascript
Ġrep ository
ret ty
Ġ19 72
24 0
Ġo un
p ol
ĠRe ed
Ġtact ical
is ite
App le
ĠQu inn
Ġrap ed
ill o
Euro pe
Ġalgorith ms
ĠRod rig
i u
Ġill um
Ġf ame
Ġintrodu cing
Ġdel ays
ĠRaid ers
Ġwh istle
Ġnovel s
ĠRe ally
Ġder iv
Ġpublic ations
ĠNe ither
ĠCom merce
Ġa ston
l anguage
Not es
ĠR oth
ĠF ear
Ġm ate
Ġpar ade
ĠQ B
Ġman eu
ĠC incinnati
m itting
Ġwa ist
ĠR ew
Ġdisc ont
Ð °
Ġst aring
Ġal ias
Ġsec urities
Ġtoile t
ĠJ edi
Ġun law
v ised
//// ////
] (
ĠWe iss
Ġpre st
ĠComp an
Ġmem o
ĠGr ace
J uly
ĠEl ite
cent er
ĠSt ay
Ġgal axy
Ġto oth
ĠS ettings
Ġsubject ed
ãĤ ¦
Ġline back
Ġretail ers
ĠW ant
Ġd angers
A ir
Ġvolunt ary
ew ay
Ġinterpret ed
ot ine
Ã §
Ġp el
Serv ice
ĠEvent ually
Ġcare ers
Ġthreat en
Ġmem or
ĠBrad ley
anc ies
s n
ĠUn known
N ational
Ġsh adows
ail and
ĠD ash
Every one
izz ard
M arch
= (
Ġpull s
Ġstr anger
Ġback wards
ĠBern ard
imens ional
Ġch ron
Ġtheoret ical
k top
Ġw are
ĠInvest ig
ĠIn iti
ĠOper ations
o ven
oc ide
* /
Ġfl ames
ĠC ash
sh it
Ġc ab
ĠAn aly
ĠSe ah
Ġdefin ing
Ġorder ing
Ġimm un
Ġpers istent
AC H
Russ ian
m ans
Ġh ind
Ġphot ography
Â ©
Ġh ug
Ġ10 7
ĠH ence
i ots
ude au
Ġsubsid ies
Ġroutine ly
ĠDev ice
it ic
Ġdisg ust
land er
Ġ19 40
Ġassign ment
ĠB esides
w ick
ĠD ust
us c
struct ed
11 1
de velop
Ġf ond
Ġinter section
Ġdign ity
Ġcommission er
With out
re ach
Ġcart oon
Ġsc ales
ãĥ Ń
F IG
Ġsurve ys
ĠIndones ia
Ġart work
Ġun ch
Ġcy cling
un ct
au er
or ate
ĠOb viously
Ġcharacter ized
fe ld
Ġaff irm
Ġinn ings
Ġ é
Ġal iens
Ġcl oth
et ooth
ĠC ertain
Â §
Ġdig est
k now
ĠX L
Ġpredict ions
Ġd in
W AR
Ġafter math
Ex ample
ĠSu ccess
ĠTh r
IG N
Ġmin er
B us
Ġcl arity
heim er
ĠO UT
ĠS end
ĠCirc le
ĠD iet
Ġpron ounced
Ġcreat ors
Ġearthqu ake
atter y
ge ons
Ġo d
Ġlay ing
or p
U lt
pro ject
Ġunder min
Ġsequ el
S am
ĠDark ness
Ġre ception
b ull
Y S
ĠV ir
Ġsequ ences
ĠCo in
Ġout fit
ĠW ait
1 19
Ġdel ivers
.... ..
Ġbl own
ĠE sc
ĠM ath
per m
ĠU l
Ġgl im
Ġfac ial
Ġgreen house
Ġto kens
/ -
ĠAnn ual
ĠON E
Ġteen age
ĠPhys ical
ĠL ang
ĠC elt
Ġsu ed
ivid ually
Ġpat ience
ch air
reg ular
Ġa ug
in v
ex cept
ĠL il
Ġn est
f d
s um
ĠCh ase
Russ ia
ĠJenn ifer
Ġoff season
Over all
F ore
Ġr iot
A ud
form er
Ġdefend ers
ĠC T
iot ic
rib ly
Ġautom ated
Ġpen is
Ġins ist
Ġdi agram
ĠS QL
ĠG arc
Ġw itch
cl ient
ier ra
am bers
Ġrec ount
f ar
V ery
oster one
Ġappreci ated
ĠPer fect
S ection
Ġd oses
oca ust
Ġcost ly
Ġg rams
ĠSh i
Ġwrest ling
Ġ19 71
Ġtro phy
Ġn erve
ĠK az
ĠExper ience
Ġpled ged
Ġplay back
Ġcreat ivity
by e
Ġattack ers
Ġhold ers
ĠCo ach
ĠPh D
Ġtransf ers
Ġcol ored
ĠH indu
Ġd rown
Ġlist ened
ĠW A
ias m
P O
Ġappeal ing
Ġdiscl osed
ĠCh icken
ag ging
Ġple aded
Ġnav igation
ĠReturn s
Ġ[ [
R OR
E A
Ġphotograp her
ĠR ider
ipp ers
Ġsl ice
Ġe rect
Ġhe d
iss ance
ĠVik ings
ur ious
Ġapp et
oubted ly
Ch ild
Ġauthent ic
o os
ĠM aking
Ġannoun cing
Ġb od
Ġmet er
ĠN ine
ĠR ogue
Ġwork force
Ġrenew ed
Ġorganis ations
ac s
P LE
Sh ort
Ġcomp ounds
ĠVis it
Ġen velop
ear th
Ġsupport ive
gg le
ĠBrus sels
ĠGu ild
Cre ate
RE L
Ġaver aged
Ġ19 69
ri ages
Ġlength y
Ġforg ot
O kay
ĠE rd
Ġdeal er
Ġrec ession
D D
Ġdesper ately
Ġhun ger
Ġst icks
Ġm ph
ĠF aith
Ġintention ally
Ġdem ol
ue ller
ĠS ale
Ġde bris
s pring
Ġle ap
>> >>
Ġcontain ers
se lling
rane an
atter ing
Ġcomment ed
ĠC M
on ut
Ġwood s
es pecially
Ġorgan ize
iv ic
ĠWood s
ang a
s qu
Ġm aj
am on
Ġax is
Ġ19 74
ĠDen mark
Ġwar rior
ĠP and
Ġout lined
ĠB O
ins ula
z illa
eb ook
Ġd are
Ġsear ched
Ġnav igate
S n
writ ing
Ġun ited
J apan
ĠHe brew
Ġfl ame
Ġrel ies
Ġcatch ing
ĠSh o
Ġimprison ment
Ġp ockets
Ġclos ure
ĠF am
t im
ade qu
Act ivity
Ġrecru iting
ĠW ATCH
ĠArgent ina
d est
Ġapolog ize
or o
Ġlack s
Ġtun ed
ĠGriff in
Ġinf amous
Ġcelebr ity
ss on
Ġ ----------------------------------------------------------------
ĠIs is
ĠDis play
Ġcred ibility
Ġeconom ies
Ġhead line
ĠCow boys
Ġind ef
Ġl ately
Ġincent ives
but ton
ĠM ob
A ut
Ġres igned
ĠO m
c amp
Ġprof iles
Ġsche mes
olph ins
ay ed
Cl inton
en h
ĠY ahoo
Ġab st
Ġan k
su its
Ġw ished
ĠMar co
udd en
Ġsp here
ĠB ishop
Ġincorpor ated
ĠPl ant
11 4
Ġh ated
p ic
Ġdon ate
Ġl ined
Ġbe ans
Ġsteal ing
Ġcost ume
Ġsher iff
Ġfor ty
Ġint act
Ġadapt ed
Ġtrave lling
b art
Ġnice ly
Ġdri ed
Ġsc al
os ity
NOT E
ĠB h
ĠBron cos
ĠI gn
Ġint imate
Ġchem istry
Ġopt imal
D eb
ĠGener ation
Ġ] ,
ich i
ĠW ii
ĠYOU R
vent ions
W rite
Ġpop ul
un ning
ĠW or
V ol
Ġqu een
head s
K K
Ġanaly ze
op ic
ear chers
Ġd ot
leg raph
ast ically
Ġupgr ades
Ġca res
Ġext ending
Ġfree ze
Ġin ability
Ġorg ans
Ġpret end
Ġout let
11 3
ol an
ĠM all
ul ing
t alk
Ġexpress ing
ĠAl ways
ĠBe gin
f iles
Ġlic enses
% %
ĠM itt
Ġfil ters
ĠMil waukee
G N
Ġunf old
M o
Ġnut rition
pp o
B o
Ġfound ing
Ġunder mine
Ġeas iest
ĠC zech
ĠM ack
Ġsexual ity
ĠN ixon
W in
ĠAr n
ĠK in
ãĤ £
ic er
Ġfort un
Ġsurf aces
agh d
Ġcar riers
ĠP ART
ĠT ib
Ġinter val
Ġfrust rating
ĠSh ip
ĠAr med
ff e
Ġbo ats
ĠAb raham
in is
Ġsu ited
th read
i ov
ab ul
ĠVenezuel a
Ġto m
su per
Ġcast le
alth ough
iox ide
ec hes
Ġevolution ary
Ġnegoti ate
Ġconfront ed
Rem ember
Ġ17 0
S uch
Ġ9 11
m ult
ĠA byss
ur ry
ke es
spe c
ĠBarb ara
Ġbelong ing
Ġvill ain
ist ani
Ġaccount able
Ġport ions
ĠDe cl
U r
ĠK ate
g re
Ġmag azines
UC K
Ġregul ate
om on
ĠAl most
Ġover view
Ġsc ram
Ġl oot
ĠF itz
Ġcharacter istic
ĠSn ake
s ay
ĠR ico
Ġtra it
ĠJo ined
au cus
Ġadapt ation
ĠAirl ines
Ġarch ae
ĠI de
Ġb ikes
Ġliter ary
Ġinflu ences
ĠUs ed
C reat
Ġple a
ĠDef ence
ĠAss ass
Ġp ond
UL T
) "
Ġeval uated
Ġob taining
Ġdem ographic
Ġvig il
ale y
Ġsp ouse
ĠSeah awks
resp ons
ĠB elt
um atic
Ġr ises
run ner
ĠMichel le
Ġpot ent
r ace
ĠP AC
F ind
olester ol
IS S
ĠIntrodu ced
ress es
ign ment
O s
ĠT u
ĠDe x
ic ides
Ġspark ed
ĠLaur a
ĠBry ant
Ġsm iling
ĠNex us
Ġdefend ants
ĠCat al
Ġdis hes
sh aped
Ġpro long
m t
( $
ãĢ Ĥ
Ġcalcul ations
ĠS ame
Ġp iv
H H
Ġcance lled
Ġgr in
Ġterrit ories
ist ically
C ome
ĠP arent
Pro ject
Ġneg lig
ĠPriv acy
Ġam mo
LE CT
olute ly
ĠEp ic
Ġmis under
w al
Apr il
m os
path y
ĠC arson
Ġalbum s
ĠE asy
Ġpist ol
< <
Ġ\ (
t arget
hel p
Ġinter pre
cons cious
ĠH ousing
ĠJ oint
12 7
Ġbe ers
s cience
ĠFire fox
effect ive
ĠC abin
ĠO kay
ĠApp lic
Ġspace craft
ĠS R
ve t
ĠStr ange
S B
Ġcor ps
iber al
e fficient
Ġpreval ence
Ġeconom ists
11 8
Th read
ord able
OD E
ĠC ant
=- =-
if iable
ĠA round
Ġpo le
Ġwilling ness
CL A
ĠK id
Ġcomple ment
Ġsc attered
Ġin mates
Ġble eding
e very
Ġque ue
ĠTr ain
Ġh ij
Ġme lee
ple ted
Ġdig it
Ġg em
offic ial
Ġlif ting
Ð µ
Re qu
it utes
Ġpack aging
ĠWork ers
h ran
ĠLeban on
ol esc
Ġpun ished
ĠJ uan
Ġj am
ĠD ocument
Ġm apping
ic ates
Ġinev itably
Ġvan illa
ĠT on
Ġwat ches
Ġle agues
Ġiniti ated
deg ree
port ion
Ġrec alls
Ġru in
Ġm elt
I AN
Ġhe m
Ex p
Ġb aking
ĠCol omb
at ible
Ġrad ius
pl ug
ĠI F
et ically
Ġf ict
H ER
ĠT ap
atin um
Ġin k
Ġco h
ĠW izard
b oth
te x
Ġsp ends
ĠCurrent ly
ĠP it
Ġneur ons
ig nt
Ġr all
Ġbus es
b uilding
Ġadjust ments
Ġc ried
ibl ical
att ed
ĠZ ion
ĠM atter
Ġmed itation
ĠD ennis
Ġour s
ĠT ab
Ġrank ings
ort al
Ġad vers
Ġsur render
ĠG ob
ci um
om as
im eter
Ġmulti player
Ġhero in
Ġoptim istic
Ġindic ator
ĠBr ig
Ġgro cery
Ġapplic ant
ĠRock et
v id
Ex ception
p ent
Ġorgan izing
Ġenc ounters
ĠT OD
Ġjew el
S ave
ĠChrist ie
Ġhe ating
Ġl azy
ĠC P
Ġcous in
Con fig
Ġreg ener
Ġne arest
Ġachie ving
EN S
th row
ĠRich mond
ant le
200 2
Ġan ten
b ird
13 3
Ġn arc
r aint
un ny
ĠHispan ic
ourn aments
Ġprop he
ĠTh ailand
ĠT i
Ġinject ion
Ġinher it
rav is
Ġmed i
Ġwho ever
ĠDE BUG
G P
ĠH ud
C ard
p rom
Ġp or
Ġover head
L aw
Ġviol ate
Ġhe ated
Ġdescript ions
Ġachieve ments
ĠBe er
ĠQu ant
W as
Ġe ighth
ĠI v
Ġspecial ized
U PDATE
ĠD elta
P op
J ul
ĠAs k
oph y
Ġnews letters
ĠT ool
Ġg ard
ĠConf eder
ĠGM T
ĠAb bott
Ġimm unity
ĠV M
Is lam
Ġimpl icit
w d
Ġ19 44
rav ity
omet ric
Ġsurv iving
ur ai
ĠPr ison
Ġr ust
ĠSk etch
Ġbe es
ĠThe ory
Ġmer it
T ex
ch at
Ġm im
Ġpast e
ĠK och
Ġignor ance
ĠSh oot
Ġbas ement
Un ited
ĠAd vis
he ight
Ġf oster
Ġdet ain
in formation
Ġne ural
' ;
Ġprov es
all ery
Ġinv itation
um bers
Ġc attle
Ġbicy cle
z i
Ġconsult ant
Ġap ology
ĠT iger
Ġ12 3
99 9
Ġind ividually
r t
ig ion
ĠBrazil ian
Ġdist urb
Ġentreprene urs
Ġfore sts
cer pt
pl ates
p her
clip se
Ġtw itter
Ġac ids
ograph ical
h um
ĠB ald
if ully
Ġcomp iler
ĠD A
Ġdon or
as i
Ġtrib al
l ash
ĠCon fig
Ġapplic ants
Ġsal aries
13 5
Put in
ĠF ocus
ir s
Ġmisc onduct
ĠH az
Ġeat en
M obile
Mus lim
ĠMar cus
v iol
Ġfavor able
Ġst ub
ad in
ĠH ob
Ġfaith ful
Ġelectron ics
Ġvac uum
w ait
back ed
econom ic
d ist
Ġten ure
Ġsince re
ĠT ogether
ĠW ave
Ġprog ression
Ġden ying
Ġdist ress
br aska
th ird
Ġmix ing
Ġcolon ial
Ġpriv ately
Ġun rest
atern ity
Ġprem ises
ant i
greg ation
Ġlic ence
ĠH ind
ĠSam uel
Ġconvinc ing
ĠA ce
ĠR ust
ĠNet anyahu
Ġhand les
ĠP atch
orient ed
ah o
ĠG onz
Ġhack ers
claim er
Ġcustom s
ĠGr an
f ighters
Ġl uc
Ġman uscript
aren thood
Ġdev il
Ġwar riors
Ġoff enders
Will iam
Ġhol idays
Ġnight mare
Ġle ver
iff erent
St at
Ġexhib ition
put ed
ĠP ure
Ġal pha
Ġenthus iasm
ĠRepresent atives
E AR
ĠT yp
Ġwhe at
ĠAl f
Ġcor rection
Ġev angel
AT T
M iss
Ġs oup
Ġimpl ied
par am
Ġsex y
ĠL ux
Ġrep ublic
p atch
ab lish
Ġic ons
Ġfather s
ĠG ET
ĠCar ib
Ġregul ated
ĠCo hen
ĠBob by
Ġn er
Ġb ent
vent ory
ĠAl ong
ĠE ST
ĠWall ace
Ġmurd ers
r ise
ke ll
ĠCommon wealth
Ġn asty
et a
ĠM IT
Ġadminist ered
Ġgenuine ly
Ed itor
n ick
Ġhyd ro
**************** ****************
ĠB le
Ġfin es
Ġg orge
aus ible
r h
Ġapp le
ment ioned
Ġro pe
ot yp
H R
Ġdisappoint ing
Ġc age
n ik
Ġdoub ts
ĠF REE
print s
ĠM UST
Ġvend ors
ĠIn qu
Ġliber als
Ġcontract or
Ġup side
child ren
Ġtrick y
Ġregul ators
charg ed
l iter
Ġ ***
Ġreb ell
l ang
Ġloc als
Ġphys icians
Ġhe y
ar se
t m
ĠLe x
Ġbehavior al
success ful
F X
Ġbr ick
ov ic
Ġcon form
Ġreview ing
Ġins ights
Ġbi ology
ĠRem ove
ĠExt ra
Ġcomm itting
indu ced
ignt y
ig m
Ġat omic
Comm on
ĠE M
ĠP ere
ĠIt ems
e h
Ġpres erved
ĠH ood
Ġprison er
Ġbankrupt cy
Ġg ren
us hes
Ġexplo itation
Ġsign atures
Ġfin an
] ,"
ĠM R
Ġme g
rem lin
Ġmusic ians
Ġselect ing
Ġexam ining
IN K
l ated
H i
Ġart ic
Ġp ets
Ġimp air
ĠM AN
Ġtable ts
in clude
R ange
Ġca ut
Ġlog s
Ġmount ing
Ġun aware
Ġdynam ics
ĠPalest ine
ĠQu arter
ĠPur ple
Ġm a
ĠIm port
Ġcollect ions
ci ation
Ġsuccess or
Ġcl one
Ġaim ing
Ġposs essed
Ġstick ing
Ġsh aking
Ġloc ate
ĠH ockey
T urn
17 0
Ġfif teen
ĠHar rison
Ġcontinu ously
ĠT C
ĠVal ent
ĠRes cue
Ġby pass
am ount
Ġm ast
Ġprotect s
Ġart istic
Ġsomet ime
Ġsh oe
Ġshout ed
ific ant
et itive
ĠReg ister
ĠJ in
Ġconcent rated
ling ton
on ies
Ġgener ator
yr im
ĠAr men
Ġclear ing
id o
ĠT W
al ph
Ġlad ies
H ard
Ġdial og
Ġinput s
æ ľ
Ġpos es
Ġsl ots
ĠPrem ium
Ġle aks
Ġboss es
Ġ11 3
c ourse
A cc
ĠNew ton
ĠAust ria
ĠM age
Ġte aches
ab ad
Ġwe ars
Ġc yl
Ġcur se
ĠS ales
ĠW ings
Ġp sy
Ġg aps
ĠIce land
ĠP interest
Ġland lord
Ġdefin itions
ĠK er
Ġsufficient ly
ĠP ence
ĠArch itect
Ġsur pass
Ġ11 4
Ġsuper hero
ĠDise ase
Ġpri ests
ĠC ulture
Ġdefin itive
Ġsecret ly
ĠD ance
inst all
ch ief
ĠJess ica
W ould
Up dated
Ġlock er
ĠK ay
Ġmem orial
è ¦
f at
Ġdis gu
Ġflav ors
ĠBase ball
ĠRes istance
Ġk icks
Ġen v
Ġteen agers
D ark
ĠC AR
Ġh alt
ĠL G
ĠGab riel
Ġfe ver
Ġs atur
Ġm all
Ġaffili ate
ĠS leep
ĠSpe cific
ĠV el
Ġj ar
ĠSac red
ĠEd wards
ĠA CL
Ġret ained
ĠG iant
Ġlim itation
in ces
Ġref usal
ĠT ale
ĠBut ler
Ġacc idents
ĠC SS
Ġimport ed
ĠCop y
Î ±
ER T
z el
Ġdiv isions
h ots
ĠAl b
ĠD S
Load er
W ashington
at isf
ĠCreat ive
\ .
ĠAut om
red ict
Ġrecept or
ĠCarl os
Met hod
ok a
Ġmal icious
Ġste pping
, [
ĠD ad
Ġatt raction
ĠEffect s
ĠPir ate
ĠC er
ĠIndust ry
ĠR ud
Ġchar ter
Ġd ining
Ġins ists
Ġconfig ure
Ġ( #
ĠSim ple
ĠSc roll
UT C
17 5
ĠK on
Ġmarket place
Ġ ãĤ
Ġref res
Ġg ates
er red
ĠP od
Ġbeh ave
Fr ank
n ode
Ġendors ed
he tt
as ive
ĠHom eland
Ġr ides
ĠLe ave
er ness
Ġflood ing
A FP
Ġris en
Ġcontin ually
Ġun anim
ĠCont ract
ĠP as
Ġgu ided
ĠCh ile
b d
Ġsu cc
pt ic
Ġcomm ittees
ĠL uther
ĠAny one
Ġs ab
12 4
Ġp ixel
ĠB ak
ĠT ag
ĠBenn ett
En ter
sm all
ĠPresident ial
Ġp ul
Ġcontr ace
arch ive
Ġcoast al
ĠK ids
19 2
âĢ ²
ick y
ING TON
Ġw olf
ĠSt alin
T ur
id get
am as
ĠUn less
Ġspons or
Ġmor ph
ĠCho ose
Ġrun ner
Ġun bel
Ġm ud
ĠMan a
Ġdub bed
Ġg odd
ure rs
wind ow
Ġrel ied
Ġcelebr ating
os c
Ġ13 5
Ġlobb ying
Ġincom plete
Ġrestrict ion
Ġinc ap
it us
Ġexpect ation
ĠAp ollo
Ġint ens
Ġsyn c
G H
Ġmanip ulation
B Y
Ġspe ar
Ġbre asts
Ġvol can
il ia
M aterial
Ġform ats
ĠB ast
Ġparliament ary
Ġsn ake
Ġserv ants
ĠTr udeau
ĠGr im
ĠArab ic
ĠSC P
ĠBoy s
st ation
Ġprospect ive
ord e
in itialized
Ġb ored
AB LE
Ġaccess ed
Ġtax i
ĠShe ll
aid en
urs ed
in ates
ĠIns urance
ĠPet e
Sept ember
6 50
Ġad ventures
ĠCo ver
Ġt ribute
Ġsk etch
Ġem power
Ġ Ø
ĠGl enn
ĠD aw
= \"
ĠPolit ics
Ġgu ides
Ġd ioxide
ĠG ore
ĠBr ight
ĠS ierra
Ġval ued
c ond
Ġpo inter
Se lect
Ġrisk y
Ġabsor b
im ages
Ġref uses
Ġbon uses
__ _
Ġh ilar
ĠF eatures
2 20
ĠCollect or
F oot
Ġ19 64
cul us
Ġd awn
Ġwork out
ĠL O
Ġphilosoph ical
ĠSand y
ĠYou th
Ġl iable
A f
bl ue
Ġovert urn
less ness
ĠTrib une
ĠIn g
Ġfact ories
Ġcat ches
Ġpr one
Ġmat rix
Ġlog in
Ġin acc
Ġex ert
s ys
Ġneed le
ĠQ ur
Ġnot ified
ould er
t x
Ġremind s
Ġpublisher s
Ġn ort
Ġg it
Ġfl ies
ĠEm ily
Ġflow ing
ĠAl ien
ĠStr ateg
Ġhard est
Ġmod ification
AP I
ĠM Y
Ġcr ashes
st airs
n umber
Ġur ging
ch annel
ĠFal con
Ġinhabit ants
Ġterr ifying
Ġutil ize
Ġban ner
Ġcig arettes
Ġsens es
ĠHol mes
Ġpract ition
ĠPhill ips
ott o
Ġcomp ile
Mod el
ĠK o
Ġ[ ]
Americ ans
ĠTer ms
Ġmed ications
ĠAn a
Ġfundament ally
ĠNot ice
Ġwe aker
Ġ 0000
Ġgar lic
Ġout break
Ġeconom ist
ĠB irth
Ġobst acles
ar cer
ĠOr thodox
Ġplace bo
ĠC rew
asp berry
ĠAng els
Ġdis charge
Ġdestruct ive
11 7
ĠR ising
Ġd airy
l ate
Ġcoll ision
ĠTig ers
ean or
ocument ed
ĠIn valid
Ġd ont
ĠL iter
ĠV a
Ġhyd rogen
Ġvari ants
ĠBrown s
Ġ19 65
Ġind igenous
Ġtrad es
Ġremain der
Ġswe pt
ĠImp act
Ġred ist
Ġun int
grad uate
ãĥ ķ
ĠW ILL
ãģ® ç
ĠCrit ical
Ġf isher
Ġv icious
Ġrevers ed
Y ear
ĠS ox
Ġshoot ings
Ġfil ming
Ġtouchdown s
ai res
m el
Ġgrand father
Ġaffect ion
ing le
Ġover ly
Add itional
Ġsup reme
ĠGr ad
Ġsport ing
Ġmer cy
ĠBrook s
ount y
Ġperform s
Ġtight ly
Ġdem ons
Ġkill ings
Ġfact ion
ĠNov a
aut s
Ġund oubtedly
ar in
Ġunder way
ra k
Ġl iv
ĠReg ion
Ġbrief ing
s ers
cl oud
ĠM ik
us p
Ġpred iction
az or
Ġport able
ĠG and
Ġpresent ing
Ġ10 80
Â »
ush i
ĠSp ark
there um
Ġjust ification
ĠN y
Ġcontract ors
ming ham
ĠSt yle
å ħ
ĠChron icles
ĠPict ure
Ġprov ing
Ġw ives
set t
Ġmole cules
ĠFair y
Ġconsist ing
Ġp ier
al one
in ition
Ġn ucle
j son
Ġg otta
Ġmob il
Ġver bal
ar ium
Ġmon ument
uck ed
Ġ25 6
T ech
mine craft
ĠTr ack
Ġt ile
Ġcompat ibility
as is
Ġs add
Ġinstruct ed
ĠM ueller
Ġle thal
Ġhorm one
Ġor che
el se
Ġske let
Ġentert aining
Ġminim ize
ag ain
Ġunder go
Ġconst raints
Ġcig arette
ĠIslam ist
Ġtravel s
ĠPant hers
l ings
C are
Ġlaw suits
ur as
Ġcry st
Ġlow ered
Ġaer ial
Ġcomb inations
Ġha un
Ġch a
Ġv ine
Ġquant ities
Ġlink ing
b ank
Ġso y
B ill
ĠAngel a
Ġrecip ient
ĠProt est
Ġs ocket
Ġsolid arity
Ġâ Ĩ
m ill
Ġvar ies
ĠPak istani
Dr agon
Ġun e
Ġhor izon
ÂłÂłÂłÂł ÂłÂłÂłÂł
Ġprov inces
Ġfrank ly
Ġenact ed
not es
[ '
Ġ19 2
ocr acy
Ġendorse ment
Ġover time
Tr ue
L ab
lic ted
ĠD NC
Ġbe ats
ĠJam ie
15 2
ĠIN T
Cont act
Ġaccount ed
h ash
ĠPack ers
p ires
Ġles bian
Ġamend ments
Ġhop eful
ĠFin land
Ġspot light
Ġconfig ured
Ġtrou bled
Ġg aze
ĠCal gary
Ġrel iability
Ġins urg
sw er
b uy
ĠSk in
Ġp ixels
Ġhand gun
Ġpar as
Ġcateg or
ĠE L
ĠRe x
Ind eed
Ġkind a
Ġconj unction
ĠBry an
ĠMan ufact
y ang
Pl us
S QL
ish ment
Ġdom inate
Ġn ail
Ġo ath
Ġeru pt
ĠF ine
it bart
ĠCh ip
ĠAb d
ĠN am
Ġbuy er
Ġdiss ent
Le aks
Cont in
Ġr ider
ĠSome one
Ġill usion
c in
ĠBoe ing
Ġin adequ
ov ation
i ants
Ġreb uild
4 50
ĠDest iny
S W
ĠT ill
H it
ia z
ĠBang l
acher s
ĠRe form
Ġse gments
Ġsystem atic
d c
ĠConserv atives
Ġport al
h or
ĠDragon bound
Ġdrag ged
om o
Ġthe e
ad vert
ĠRep orts
ĠE t
Ġbarrel s
Aug ust
Ġcompar isons
Ġhe x
Ġan throp
" [
bor ough
ab i
Ġpict ured
play ing
ĠAdd ress
ĠMir ror
Sm ith
Ġt ires
ĠN PR
AA AA
Ġclass ification
ĠTh an
ĠH arm
ĠR A
Ġreject ion
min ation
Ġr anged
ĠF alls
D I
H ost
ãĤ ´
ĠEx ample
list ed
th irds
Ġsaf egu
br and
Ġprob able
Can ada
IT ION
ĠQ aeda
Ġch ick
Ġimport s
h it
l oc
W W
Ġble w
Ġany time
Ġwh oles
ik ed
Ġcal culation
cre ate
ĠO ri
Ġupgr aded
Ġapp ar
ut ory
ĠM ol
B rit
ĠJ ong
IN AL
ĠStart ing
Ġd ice
urt le
Ġre lying
cl osure
Ġprof itable
Ġsl aughter
ĠMan ual
c aster
Ġ" $
Ġfe ather
ĠSim ply
ie ves
Ġdeter ior
ĠPC I
Ġst amp
Ġfl aws
Ġsh ade
ham mer
Ġpass port
Ġcont ing
am el
Ġobser vers
Ġneg lect
ĠR B
ĠBrother hood
Ġskept ical
f amily
us k
Ġemotion ally
â Ļ
ĠBet a
ason able
id ity
ĠM ul
Ġkick ing
ĠC arm
oll ah
VERT IS
ĠAt hen
Ġlad der
ĠBul let
å £
00 01
ĠWild life
ĠM ask
ĠN an
R ev
Ġun acceptable
leg al
Ġcrowd ed
ag i
ĠC ox
j e
Ġmor ality
Ġfu els
Ġc ables
Ġman kind
ĠCarib bean
Ġanch or
Ġby te
ĠO ften
ĠO z
Ġcraft ed
Ġhistor ian
ĠW u
Ġtow ers
ĠCitiz ens
Ġhel m
Ġcred entials
Ġsing ular
ĠJes se
Ġtack les
Ġcont empt
Ġa fore
ĠSh adows
Ġn il
Ġur gent
app le
bl ood
Ġv on
Ġoff line
Ġbreat he
Ġj umps
Ġirre levant
ox ic
om al
import ant
J im
Ġgl oves
arm ing
dep th
Ġtal ents
ook ie
ĠS B
Ġpal m
uff s
est a
IG H
Ġcan on
ĠVer izon
ĠP le
Ġcou pled
vel t
Ġfundra ising
ĠGet ting
ĠD LC
Ġmathemat ical
ĠH S
ĠCard inals
te lling
Ġspons ors
Ġ Ï
ĠBull s
op tion
Ġprop ose
Ġmem orable
Ġembr aced
Ġdecl ining
He alth
ed a
Ġ} ;
Ġsp am
m ile
Ġpit cher
ĠE ight
Ġcar ing
ut ic
ro le
Ġair line
ernand ez
ĠAth let
Ġcert ification
ux e
rig er
Ġem pir
Ġsens ation
Ġdis m
Ġb olt
Ġev olve
H ouse
Ġconsult ation
ĠD uty
Ġtou ches
ĠN athan
Ġf aint
h ad
" (
ĠCons umer
ĠExt reme
Ġ12 7
ĠHer m
ĠSac rament
iz oph
Ġanx ious
ul ously
Ġsoc ially
ĠU TC
Ġsol ving
ĠLet ter
Hist ory
ed uc
Pr ice
) );
Ġrel oad
am ic
Ġp ork
Ġdisc ourse
Ġt ournaments
ai ro
ĠK ur
ĠCost a
Ġviol ating
Ġinterf ere
Ġrecre ational
uff le
Ġspe eches
Ġneed ing
Ġremem bers
Ġcred ited
n ia
f ocused
amer a
Ġb ru
um bs
ĠCub an
Ġpreced ing
Ġnons ense
ac ial
Ġsmart phones
ĠSt ories
S ports
ĠEmer gency
oun cing
ef ined
Ġb er
Ġconsult ing
Ġm asters
he astern
." [
ĠRun ning
Ġsus cept
ĠF eng
Americ a
pr ises
st itial
ĠWeek ly
ĠGreat er
mod ules
if ter
G raphics
ul er
Ġwho lly
Ġsupp ress
Ġconce aled
Ġhapp ily
Ġaccept s
ĠEn joy
Ġr ivers
ĠEx cept
2 25
ĠN HS
ĠMc Connell
Ġp ussy
fer red
ut able
Ġatt ain
Ġ> =
Ġdepos its
roph ic
Ġnot orious
ĠSh aw
il itation
Ġepid emic
all ic
Ġsmall est
ov ich
Ġaccess ories
per ties
Ġsur plus
ĠMe ch
Ġamb ig
ĠImm igration
Ġch im
ev al
Ġpract icing
ĠMyster y
Ġdom ains
ĠSil icon
app s
Ġkilomet ers
e a
ĠSm ash
Ġwarrant y
Ġn ost
s il
re v
J on
ĠDub lin
Ġtast es
Ġb out
g reat
er ror
Ġsw itches
ĠB apt
D O
ok i
Ġsour ced
pro du
Ġattach ment
ĠIss ue
ĠQuest ion
Jo in
Ġf itted
Ġunlaw ful
^ ^
ere k
Ġauthent ication
Ġst ole
Ġaccount ability
l abel
S earch
Ġal beit
atic an
fund ed
ĠAdd ing
ĠI Q
Ġsub mar
l it
a que
ĠLear ning
Ġint eger
M aster
ĠCh rom
Ġprem ier
O p
ĠLi u
Ġbl essed
ĠGl obe
ĠResp onse
Ġlegit im
ĠMer kel
Ġdispos al
Â ´
Ġgau ge
pe at
Ġindu ced
Ġquestion able
arth y
ĠV it
ĠF eed
U ntil
U t
worth y
R Y
ĠH erald
ĠHam mer
Ġmed al
ĠR ivers
ĠH ack
Ġclar ify
Ġtrack ed
Ġautonom ous
Ġten ant
ĠQ atar
er ie
Ġgr im
ĠMon itor
Ġresist ant
ĠSpe c
ĠWell s
N AS
14 8
Ġmin ers
iot ics
Ġmiss es
11 6
g ian
g it
ĠE yes
p res
Ġgrad uated
Ġang el
Ġsyn chron
Ġefficient ly
Ġtrans mitted
H arry
Ġglob ally
EN CE
ĠMont ana
r aged
ĠPre vention
Ġp iss
ĠL l
Ġshe lf
ĠB JP
ĠTest ament
ĠL ate
ik er
ĠH app
ĠJul ian
h all
Ġsp ont
Ġshut down
Ġincons istent
Ġsubscrib ers
Ġske leton
ĠNe braska
Ġins pire
ĠV oid
F eed
Ġang les
ĠSpr ings
Ġbench mark
Ġvacc ines
izoph ren
se xual
uff ed
Ġsh ine
ĠK ath
Ġgest ure
ine a
Ġr ip
Ġopp ression
Ġcons cience
b t
ĠL um
Ġinc idence
ĠF a
w r
Ġmin eral
ĠSp urs
alk y
Ġth under
Ġop io
Be ing
ĠPal m
Ġwas ted
Ġl b
i aries
ĠIniti ative
Ġcur ric
Ġmark er
ĠMc L
Ġext ensions
ĠP v
ĠAr ms
Ġoffer ings
Ġdef enses
Ġvend or
Ġcontrad ict
ĠCol in
Ġredd it
Ġper ipher
12 2
Ġs ins
E dit
IC T
So ft
ĠSh ah
Ġadministr ator
ĠT rip
Ġporn ography
Ġtu ition
in ence
ĠPro gress
Ġcat alog
Ġsu ite
Ġh ike
Ġreprodu ctive
eng ine
Ġd rought
ĠNo ah
Ġ2 30
Ġd ude
Ġrelax ed
Ġpart ition
Ġparticip ant
Ġtel esc
Ġfe as
ĠF F
own er
Ġswe eping
Ġl enses
Ġmatch up
ĠRe pl
ourn als
Ġcred ible
Ġgrand mother
Ġther mal
Ġsubscrib ing
Ġident ities
col m
U CT
Ġreluct ant
us ers
ĠC ort
Ġassist ed
OS S
ATION S
IS H
Ġpharm aceutical
ic able
ad ian
ĠSon ic
ĠF ury
ĠM ong
A H
ĠPsych ology
Ġph osph
Ġtreat s
Ń Ķ
Ġstead ily
ĠHell o
Ġrel ates
Ġcl ue
Ex pl
a uth
Ġrev ision
Ġe ld
os ion
Ġbr on
14 4
ri kes
Ġmin es
Ġblank et
ĠF ail
el ed
ĠIm agine
ĠPl anned
a ic
Re quest
M ad
ĠHor se
ĠEag le
Ġcap ac
15 7
Ġl ing
ĠN ice
ĠP arenthood
min ster
og s
ens itive
Not hing
Ġcar n
F in
ĠP E
Ġr ifles
ĠL P
S and
Ġgui Active
Ġtour ist
C NN
Ġunve iled
Ġpredec essor
} {
u ber
Ġoff shore
Ġopt ical
ĠR ot
ĠPear l
et on
Ġst ared
Ġfart her
at ility
cont in
ĠG y
ĠF oster
ĠC oc
ri ents
Ġdesign ing
ĠEconom y
ON G
W omen
ĠN ancy
er ver
Ġmas cul
Ġcasual ties
Ġ2 25
ĠS ullivan
ĠCh oice
Ġa ster
w s
Ġhot els
Ġconsider ations
Ġcou ch
ĠSt rip
ĠG n
Ġmanip ulate
l ied
Ġsynt hetic
Ġassault ed
Ġoff enses
ĠDra ke
Ġim pe
Oct ober
ĠHer itage
h l
ĠBl air
Un like
Ġg rief
Ġ4 50
Ġopt ed
Ġresign ation
il o
Ġver se
ĠT omb
Ġu pt
Ġa ired
ĠH ook
ĠML B
Ġassum es
out ed
ĠV ers
Ġinfer ior
Ġbund le
ĠD NS
ograp her
Ġmult ip
ĠSoul s
Ġillust rated
Ġtact ic
Ġdress ing
Ġdu o
Con f
Ġrel ent
Ġc ant
Ġscar ce
Ġcand y
ĠC F
Ġaffili ated
Ġspr int
yl an
ĠGarc ia
Ġj unk
Pr int
ex ec
C rit
Ġport rait
ir ies
ĠOF F
Ġdisp utes
W R
L ove
ãģ Ħ
ĠRe yn
Ġh ipp
op ath
Ġflo ors
ĠFe el
Ġwor ries
Ġsett lements
ĠP os
Ġmos que
Ġfin als
Ġcr ushed
ĠPro bably
ĠB ot
ĠM ans
ĠPer iod
Ġsovere ignty
Ġsell er
Ġap ost
Ġam ateur
Ġd orm
Ġconsum ing
Ġarm our
ĠRo ose
Ġint ensive
Ġelim inating
ĠSun ni
ĠAle ppo
j in
Ġadv ise
p al
ĠH alo
Ġdes cent
Ġsimpl er
Ġbo oth
ST R
L ater
ĠC ave
== =
Ġm ol
Ġf ist
Ġshot gun
su pp
Ġrob bery
E ffect
Ġobsc ure
ĠProf essional
Ġemb assy
Ġmilit ant
Ġinc arcer
Ġgener ates
Ġlaun ches
Ġadministr ators
Ġsh aft
Ġcirc ular
Ġfresh man
ĠW es
ĠJo el
ĠD rew
ĠDun can
ĠApp arently
s ight
ĠIntern al
ĠInd ividual
ĠF E
Ġb ore
ĠM t
Ġbroad ly
ĠO ptions
ount ain
ip es
ĠV ideos
20 4
Ġh ills
Ġsim ulation
Ġdisappoint ment
it an
ĠLabor atory
Ġup ward
Ġbound ary
Ġdark er
h art
Ġdomin ance
C ong
ĠOr acle
ĠL ords
Ġscholars hip
ĠVin cent
ed e
ĠR ah
Ġencour ages
ro v
Ġqu o
Ġprem ise
ĠCris is
ĠHol ocaust
Ġrhyth m
Ġmet ric
cl ub
Ġtransport ed
Ġn od
ĠP ist
Ġancest ors
ĠFred er
th umbnails
ĠC E
ON D
Ph il
ven ge
ĠProduct s
cast le
Ġqual ifying
ĠK aren
VERTIS EMENT
Ġmight y
Ġexplan ations
Ġfix ing
D i
Ġdecl aring
Ġanonym ity
Ġju ven
ĠN ord
ĠDo om
ĠAct ually
O k
ph is
ĠDes ert
Ġ11 6
I K
ĠF M
Ġinc omes
V EL
ok ers
Ġpe cul
Ġlight weight
g ue
Ġacc ent
Ġincre ment
ĠCh an
Ġcompl aining
ĠB aghd
Ġmidfield er
Ġover haul
Pro cess
ĠH ollow
ĠTit ans
Sm all
man uel
ĠUn ity
ĠEv ents
S ty
Ġdispro portion
n esty
en es
ĠC od
Ġdemonstr ations
ĠCrim son
ĠO H
Ġen rolled
Ġc el
ĠBre tt
Ġa ide
Ġhe els
Ġbroad band
Ġmark ing
Ġw izard
ĠN J
ĠChief s
Ġingred ient
Ġd ug
ĠSh ut
urch ase
end or
Ġfar mer
ĠGold man
12 9
15 5
Or der
Ġl ion
i ably
Ġst ain
ar ray
ilit ary
ĠFA Q
Ġexpl oded
ĠMcC arthy
ĠT weet
ĠG reens
ek ing
l n
ens en
Ġmotor cycle
Ġpartic le
Ġch olesterol
B ron
Ġst air
Ġox id
Ġdes irable
ib les
Ġthe or
for cing
Ġpromot ional
ov o
b oot
ĠBon us
raw ling
Ġshort age
ĠP sy
Ġrecru ited
Ġinf ants
Ġtest osterone
Ġded uct
Ġdistinct ive
Ġfirm ware
bu ilt
14 5
Ġexpl ored
Ġfact ions
Ġv ide
Ġtatt oo
Ġfinan cially
Ġfat igue
Ġproceed ing
const itutional
Ġmis er
Ġch airs
gg ing
ipp le
Ġd ent
Ġdis reg
ç Ķ
st ant
ll o
b ps
aken ing
Ġab normal
ĠE RA
å£ «
ĠH BO
ĠM AR
Ġcon cess
Ġserv ant
Ġas pir
l av
ĠPan el
am o
Ġprec ip
Ġrecord ings
Ġproceed ed
Ġcol ony
ĠT ang
ab lo
Ġstri pped
Le ft
to o
Ġpot atoes
Ġfin est
% ).
Ġc rap
ĠZ ach
ab ases
ĠG oth
Ġbillion aire
w olf
Ġsan ction
S K
Ġlog ged
P o
ey ed
un al
Ġcr icket
Ġarm ies
Ġunc overed
Cl oud
Ã³ n
Ġreb ounds
Ġm es
O per
P ac
Ġnation ally
Ġinsert ed
p ict
Ġgovern ance
Ð ¸
Ġprivile ges
G ET
Ġfavor ites
im ity
Ġlo ver
the m
em pl
Ġgorge ous
An n
Ġsl ipped
Ġve to
B ob
Ġsl im
u cc
ĠF ame
udden ly
Ġden ies
ĠM aur
Ġdist ances
Ġw anna
t ar
ĠS ER
Ġâ Ī
Ġle mon
at hetic
Ġlit eral
Ġdistingu ished
Ġansw ering
G I
Ġrelig ions
ĠPhil os
ĠL ay
Ġcomp os
ire ments
ĠK os
ine z
roll ing
Ġyoung est
and ise
ĠB orn
Ġalt ar
am ina
ĠB oot
v oc
Ġdig ging
Ġpress ures
Ġl en
26 4
Ġassass ination
ĠBir mingham
ĠMy th
Ġsovere ign
ĠArt ist
ĠPhot ograph
Ġdep icted
Ġdisp ens
orth y
Ġamb ul
int eg
ĠC ele
ĠTib et
Ġhier archy
Ġc u
Ġpre season
ĠPet erson
Ġcol ours
Ġworry ing
Ġback ers
ĠPal mer
ĠÎ ¼
Ġcontribut or
Ġhear ings
Ġur ine
Ġ Ù
ourge ois
Sim ilar
ĠZ immer
s omething
ĠUS C
Ġstrength s
ĠF I
Ġlog ging
As ked
ĠTh ai
in qu
ĠW alt
Ġcrew s
it ism
3 01
Ġshar ply
um ed
Ġred irect
r ators
In f
ĠWe apons
Ġte asp
19 99
L ive
ĠEs pecially
ĠS ter
ĠVeter ans
Ġint ro
other apy
Ġmal ware
Ġbre eding
Ġmole cular
ĠR oute
ĠCom ment
oc hem
Ġa in
Se ason
Ġlineback er
Ä «
ĠEconom ics
es ar
ĠL ives
ĠEm ma
Ġk in
ĠTer rit
Ġpl anted
ot on
ĠBut ter
ĠSp ons
P ER
Ġdun geon
Ġsymb olic
Ġfil med
Ġdi ets
Ġconclud es
Ġcertain ty
ĠForm at
Ġstr angers
form at
ĠPh ase
Ġcop ied
Ġmet res
ld a
ĠUs ers
Ġdeliber ate
Ġwas hed
ĠL ance
im ation
Ġimpro per
ĠGen esis
ick r
ĠK ush
Ġreal ise
Ġembarrass ing
alk ing
b ucks
Ġver ified
Ġout line
year s
ĠIn come
20 2
Ġz ombies
F inal
ĠMill enn
Ġmod ifications
ĠV ision
ĠM oses
ver b
iter ranean
ĠJ et
Ġnav al
ĠA gg
Ġur l
Ġvict ories
Ġnon etheless
Ġinj ust
ĠF act
ç ļ
Ġins ufficient
re view
face book
Ġnegoti ating
Ġguarant ees
im en
uten berg
Ġg ambling
Ġcon gr
Load ing
Ġnever theless
Ġpres idents
ĠIndust rial
Ġ11 8
Ġp oured
ĠT ory
Ġ17 5
Ġ: =
Sc ott
ange red
T ok
Ġorgan izers
M at
ĠG rowth
Ġad ul
Ġens ures
Ġ11 7
é¾į å
Ġmass acre
Ġgr ades
be fore
AD VERTISEMENT
ĠSl ow
ĠM MA
âĢĶ "
ĠV atican
Q aeda
Ġo we
66 66
ĠS orry
ĠGr ass
Ġbackground s
Ġexha usted
Ġcl an
Ġcomprom ised
ĠE lf
ĠIsa ac
ens on
In vest
IF A
Ġinterrupt ed
ãĥī ãĥ©
Ġtw isted
ĠDrag ons
M ode
ĠK remlin
Ġfert il
he res
ph an
ĠN ode
f ed
ĠOr c
Ġunw illing
C ent
Ġprior it
Ġgrad uates
Ġsubject ive
Ġiss uing
ĠL t
Ġview er
Ġw oke
Th us
bro ok
Ġdep ressed
Ġbr acket
ĠG or
ĠFight ing
Ġstri ker
Rep ort
ĠPortug al
Ġne o
w ed
19 9
Ġflee ing
sh adow
ident ified
US E
Ste am
Ġstret ched
Ġrevel ations
art ed
ĠD w
Ġalign ment
est on
ĠJ ared
S ep
Ġblog s
up date
g om
r isk
Ġcl ash
ĠH our
Ġrun time
Ġunw anted
Ġsc am
Ġr ack
Ġen light
on est
ĠF err
Ġconv ictions
Ġp iano
Ġcirc ulation
ĠW elcome
Ġback lash
ĠW ade
Ġrece ivers
ot ive
J eff
Ġnetwork ing
ĠPre p
ĠExpl orer
Ġlect ure
Ġupload ed
ĠMe at
B LE
ĠNaz is
ĠSy nd
st ud
ro ots
ri ans
Ġportray ed
Ġ ??
ĠBudd ha
s un
Rober t
ĠCom plex
Ġover see
Ġste alth
T itle
ĠJ obs
ĠK um
Ġappreci ation
ĠM OD
Ġbas ics
Ġcl ips
Ġnurs ing
Ġpropos ition
Ġreal ised
ĠNY C
Ġall ocated
ri um
ar an
ĠPro duction
ĠV ote
Ġsm ugg
Ġhun ter
az er
ĠCh anges
Ġfl uct
y on
Ar ray
Ġk its
W ater
Ġuncom mon
Ġrest ing
ell s
w ould
Ġpurs ued
Ġassert ion
omet own
ĠMos ul
ĠPl atform
io let
Ġshare holders
Ġtra ils
P ay
ĠEn forcement
ty pes
ĠAn onymous
Ġsatisf ying
il ogy
Ġ( '
w ave
c ity
Ste ve
Ġconfront ation
ĠE ld
C apt
ah an
ht m
ĠC trl
ON S
2 30
if a
hold ing
Ġdelic ate
Ġj aw
ĠGo ing
or um
S al
Ġd ull
ĠB eth
Ġpr isons
Ġe go
ĠEl sa
avor ite
ĠG ang
ĠN uclear
Ġsp ider
ats u
Ġsam pling
Ġabsor bed
ĠPh arm
iet h
Ġbuck et
ĠRec omm
O F
ĠF actory
AN CE
Ġb acter
H as
ĠObs erv
12 1
Ġprem iere
De velop
Ġcur rencies
C ast
Ġaccompany ing
ĠNash ville
Ġfat ty
ĠBre nd
Ġloc ks
Ġcent ered
ĠU T
augh s
or ie
ĠAff ordable
v ance
D L
em et
Ġthr one
ĠBlu etooth
Ġn aming
if ts
AD E
Ġcorrect ed
Ġprompt ly
ĠST R
Ġgen ome
Ġcop e
Ġval ley
Ġround ed
ĠK end
al ion
p ers
Ġtour ism
Ġst ark
v l
Ġblow ing
ĠSche dule
st d
Ġunh appy
Ġlit igation
ced es
Ġand roid
Ġinteg ral
ere rs
ud ed
t ax
Ġre iter
ĠMot ors
oci ated
Ġwond ers
ĠAp ost
uck ing
ĠRoose velt
f ram
Ġyield s
Ġconstit utes
aw k
Int erest
Ġinter im
Ġbreak through
ĠC her
Ġpro sec
ĠD j
ĠM T
Res p
ĠP T
Ġs perm
ed it
B T
Lin ux
count ry
le ague
Ġd ick
Ġo ct
Ġinsert ing
Ġsc ra
ĠBrew ing
Ġ19 66
Ġrun ners
Ġpl un
id y
ĠD ian
Ġdys function
Ġex clusion
Ġdis gr
Ġincorpor ate
Ġrecon c
Ġnom inated
ĠAr cher
d raw
achel or
Ġwrit ings
Ġshall ow
Ġh ast
ĠB MW
ĠR S
Ġth igh
Ġ19 63
Ġl amb
Ġfav ored
ag le
Ġcool er
ĠH ours
ĠG U
ĠOrig in
Ġglim pse
---------------- ----
L im
Ġche ek
Ġj ealous
- '
Ġhar ness
ĠPo ison
Ġdis abilities
ne apolis
Ġout look
Ġnot ify
ĠIndian apolis
Ġab rupt
ns ic
Ġenc rypted
Ġfor fe
reat h
Ġr abb
Ġfound ations
Ġcompl iment
ĠInter view
ĠS we
Ġad olesc
Ġmon itors
ĠSacrament o
Ġtime ly
Ġcontem pl
Ġposition ed
Ġpost ers
ph ies
iov ascular
v oid
ĠFif th
Ġinvestig ative
OU N
Ġinteg rate
ĠIN C
ish a
ibl ings
ĠRe quest
ĠRodrig uez
Ġsl ides
ĠD X
Ġfemin ism
Ġdat as
Ġb end
ir us
ĠNig eria
F ox
Ch ange
Ġair plane
ĠLad en
Ġpublic ity
ixt y
Ġcommit ments
Ġaggreg ate
Ġdisplay ing
ĠAr row
Ġ12 2
Ġrespect s
and roid
s ix
ĠSh a
Ġrest oration
) \
W S
oy s
Ġillust rate
with out
12 6
ĠâĶ Ĥ
Ġpick up
n els
Ġ ....
f ood
ĠF en
) ?
Ġphenomen a
Ġcompan ions
ĠW rite
Ġsp ill
Ġbr idges
ĠUp dated
ĠF o
Ġinsect s
ASH INGTON
Ġsc are
il tr
ĠZh ang
Ġsever ity
Ġind ul
14 9
ĠCo ffee
Ġnorm s
Ġp ulse
ĠF T
Ġhorr ific
ĠDest roy
ĠJ SON
Ġo live
Ġdiscuss es
R est
E lect
ĠW inn
ĠSurv iv
ĠH ait
S ure
op ed
Ġro oted
ĠS ke
ĠBron ze
Ġl ol
Def ault
Ġcommod ity
red ited
Ġliber tarian
Ġforb idden
Ġgr an
à ¨
Ġl ag
en z
dri ve
Ġmathemat ics
Ġw ires
Ġcrit ically
Ġcarb ohyd
ĠChance llor
ĠEd die
Ġban ning
ĠF ri
Ġcompl ications
et ric
ĠBangl adesh
Ġband width
St op
ĠOrig inally
Ġhalf way
yn asty
sh ine
Ġt ales
rit ies
av ier
Ġspin ning
ĠWH O
Ġneighbour hood
b ach
Ġcommer ce
ĠS le
B U
Ġentreprene ur
Ġpecul iar
ĠCom ments
f re
3 20
IC S
Ġimag ery
ĠCan on
ĠElect ronic
sh ort
( (
D ig
Ġcomm em
u ced
Ġincl ined
ĠSum mon
Ġcl iff
ĠMed iterranean
Ġpo etry
Ġprosper ity
ĠRe ce
Ġp ills
m ember
Ġfin ale
un c
ĠG ig
ä ½
Ġl od
Ġback ward
- +
ĠFor ward
Ġth ri
s ure
Ġso ap
ĠF X
R ES
ĠSe xual
oul os
Ġfool ish
Ġright eous
Ġco ff
terror ism
ust ain
ot er
Ġab uses
ne xt
Ġab usive
Ġthere after
Ġprohib ition
ĠS UP
Ġd ip
Ġr ipped
Ġinher ited
Ġb ats
st ru
G T
Ġflaw ed
ph abet
Ġf og
do ors
Ġim aging
Ġdig its
ĠHung ary
Ġar rog
Ġteach ings
Ġprotocol s
ĠB anks
à ¸
p ound
ĠC urt
." )
. /
Ġex emption
end ix
ĠM ull
Ġimpro ves
ĠG amer
d imensional
I con
ĠMarg aret
St atus
d ates
Ġint ends
Ġdep ict
Ġpark ed
J oe
ĠMar ines
chn ology
! ).
Ġjud ged
Ġwe ights
R ay
Ġapart ments
he ster
Ġrein force
Ġoff ender
occ up
Ġs ore
e pt
ĠPH P
ĠB row
Ġauthor ization
ĠR isk
ĠDel aware
ĠQ U
Ġnot ifications
Ġsun light
Ġex clude
d at
Ġm esh
ĠSud an
Ġbelong ed
Ġsub way
Ġno on
ĠInter ior
ol ics
ĠL akers
Ġc oding
Dis claimer
Cal if
O ld
Ġdis l
???? ?
Ġconfir ms
Ġrecruit ment
Ġhom icide
Cons ider
ĠJeff rey
ft y
} ;
Ġobject ion
do ing
ĠLe o
W ant
Ġgl ow
ĠClar ke
ĠNorm an
Ġver ification
Ġpack et
ĠForm ula
Ġpl ag
es ville
Ġshout ing
Ġo v
ĠR EC
ĠB ub
Ġn inth
Ġener g
Ġvalid ity
Ġup s
j ack
Ġneighbor ing
ĠN ec
ew orks
ĠH ab
are z
Ġsp ine
Ġevent ual
ĠLe aders
ĠC arn
Ġprob ation
Ġrom ance
ms g
ĠMechan ical
ER Y
R ock
Ġpart isan
N ode
ass ets
min ent
Ġforeign ers
Ġtest ify
ĠUs ually
l ords
ĠG ren
ĠPow ell
BI L
Ġs r
Ġadd ict
Ġshell s
Ġs igh
ĠY ale
tern ity
Ġ7 50
E U
ĠR ifle
Ġpat ron
em a
ĠB annon
an ity
Ġtrop ical
ĠV II
c ross
Every thing
ĠIS O
Ġhum ble
ass ing
ĠF IG
Ġupd ating
ys on
Ġcal cium
Ġcompet ent
Ġste ering
Pro t
ĠS Y
ĠFin als
ĠR ug
15 9
13 7
ĠG olf
Ġ12 6
Ġaccommod ation
ĠHug hes
Ġaest hetic
art isan
ĠTw ilight
Ġpr ince
ĠAgric ulture
ĠDis co
Ġpreced ent
Ġtyp ing
author ized
O ption
ĠA ub
l ishes
ach t
m ag
P eter
ĠU FO
mont on
ĠL ith
Ġa rom
Ġsec uring
Ġconf ined
priv ate
Ġsw ords
Ġmark ers
Ġmetab olic
se lect
ĠCur se
ĠO t
g ressive
Ġinc umb
ĠS aga
Ġpr iced
Ġclear ance
Cont ent
Ġdr illing
Ġnot ices
Ġb ourgeois
Ġv est
Ġcook ie
ĠGuard ians
ry s
in yl
Ġ12 4
Ġpl ausible
on gh
ĠOd in
Ġconcept ion
ĠY uk
ĠBaghd ad
ĠFl ag
Aust ral
ĠI BM
Ġintern ationally
ĠWiki Leaks
I ED
Ġc yn
Ġcho oses
ĠP ill
Ġcomb ining
Ġrad i
ĠMoh ammed
def ense
atch ing
Sub ject
ic iency
Fr ame
Ġ{ "
Ġche ss
Ġtim er
19 0
Ġt in
Ġord inance
emet ery
Ġacc using
Ġnotice able
Ġcent res
Ġl id
ĠM ills
img ur
Ġz oom
erg ic
Ġcomp ression
pr im
f ind
Ġsur g
Ġp and
ĠK ee
ĠCh ad
cell ence
oy le
Ġsocial ism
ĠT ravis
ĠM Hz
Ġgu ild
ALL Y
ĠSub scribe
ĠRel ated
Ġoccur rence
itch ing
Ġfict ional
Ġcr ush
ĠE A
c od
m ix
ĠTri ple
Ġretrie ve
Ġstimul us
Ġpsych iat
ĠDo or
Ġhomosexual ity
Ġelement ary
Ġcell ular
id ian
ĠL aun
Ġintrig uing
Ġfo am
ĠB ass
id i
its u
Ġass ure
Ġcongr at
Ġbusiness man
ĠBo ost
cl ose
Ġl ied
Ġsc iences
ĠO mega
ĠG raphics
Ġ< =
sp oken
Ġconnect ivity
S aturday
ĠAven gers
Ġto ggle
Ġank le
Ġnational ist
mod el
ĠP ool
ophob ia
V ar
ĠM ons
ator ies
Ġaggress ively
C lear
For ge
act ers
Ġhed ge
Ġpip es
Ġbl unt
Ġs q
Ġremote ly
W ed
as ers
Ġref riger
Ġt iles
Ġresc ued
Ġcompr ised
ins ky
Ġman if
avan augh
Ġprol ifer
Ġal igned
x ml
Ġtri v
Ġcoord ination
ĠP ER
ĠQu ote
13 4
b f
ĠS aw
Ġtermin ation
Ġ19 0
Ġadd itions
Ġtri o
Ġproject ions
Ġpositive ly
Ġin clusive
Ġmem br
19 90
old er
Ġpract iced
ink le
Ar ch
Ġstar ters
ari us
Ġinter mediate
ĠBen ef
ĠK iller
Ġinter ventions
ĠK il
ĠF lying
In v
Ġprem ature
Ġpsych iatric
Ġind ie
Ġcoll ar
ĠRain bow
af i
Ġdis ruption
ĠFO X
cast ing
Ġmis dem
c ro
Ġw ipe
ard on
Ġb ast
ĠTom my
ĠRepresent ative
Ġbell y
ĠP O
ĠBre itbart
13 2
Ġmess aging
Sh ould
Ref erences
ĠG RE
ist ical
L P
ĠC av
ĠC razy
Ġintu itive
ke eping
ĠM oss
Ġdiscont in
ĠMod ule
Ġun related
ĠPract ice
ĠTrans port
Ġstatist ically
orn s
Ġs ized
p u
Ġca f
ĠWorld s
ĠRod gers
ĠL un
ĠCom ic
l iving
Ġc ared
Ġclim bed
) {
Ġconsist ed
Ġmed ieval
fol k
Ġh acked
Ġd ire
ĠHerm ione
Ġt ended
ce ans
D aniel
w ent
Ġlegisl ators
Ġred es
g ames
Ġg n
am iliar
Ġ+ +
gg y
th reat
Ġmag net
Ġper ceive
Ġz ip
Ġindict ment
Ġcrit ique
g ard
ĠSaf e
ĠC ream
Ġad vent
ob a
Ġv owed
ous ands
Ġsk i
Ġabort ions
u art
Ġstun ned
Ġadv ancing
Ġlack ed
Ġ\ "
Ġsch izophren
Ġeleg ant
Ġconf erences
Ġcance led
ĠHud son
ĠHop efully
Ġtr ump
Ġfrequ encies
Ġmet eor
ĠJun ior
ĠFle et
ĠMal colm
ĠT ools
Ġ ........
Ġh obby
ĠEurope ans
Ġ15 00
ĠInt o
Ġs way
ĠApp ro
ĠCom pl
Comm unity
Ġt ide
ĠSum mit
ä »
Ġinter vals
ĠE ther
Ġhabit at
ĠSteven s
lish ing
ĠDom ain
Ġtrig gers
Ġch asing
Ġchar m
ĠFl ower
it ored
Ġbless ing
Ġtext ures
F ive
Ġliqu or
R P
F IN
Ġ19 62
C AR
Un known
Ġres il
ĠL ily
Ġabund ance
Ġpredict able
r ar
Ġbull shit
le en
che t
M or
M uch
ä ¹
Ġemphas ized
Ġcr ust
Ġprim itive
Ġenjoy able
ĠPict ures
Ġteam mate
pl er
ĠT ol
ĠK ane
Ġsummon ed
th y
ram a
ĠH onda
Ġreal izing
Ġquick er
Ġconcent rate
cle ar
Ġ2 10
ĠErd ogan
ar is
Ġrespond s
ĠB I
Ġelig ibility
Ġpus hes
ĠId aho
Ġagg rav
Ġru ins
ur ations
Ġb ans
Ġan at
sh are
Ġgr ind
h in
um en
Ġut ilities
ĠYan kees
Ġdat abases
ĠD D
Ġdispl aced
Ġdepend encies
Ġstim ulation
h un
h ouses
ĠP retty
ĠRaven s
ĠTOD AY
Ġassoci ates
Ġthe rape
cl ed
Ġde er
Ġrep airs
rent ice
Ġrecept ors
Ġrem ed
ĠC e
Ġmar riages
Ġball ots
ĠSold ier
Ġhilar ious
op l
13 8
Ġinherent ly
Ġignor ant
Ġb ounce
ĠE aster
REL ATED
ĠCur rency
E V
ãĥ ŀ
ĠLe ad
Ġdece ased
B rien
ĠMus k
J S
Ġmer ge
heart ed
c reat
m itt
m und
ĠâĢ ĭ
ĠB ag
Ġproject ion
Ġj ava
ĠStand ards
ĠLeon ard
Ġcoc onut
ĠPop ulation
Ġtra ject
Ġimp ly
Ġcur iosity
ĠD B
ĠF resh
ĠP or
Ġheav ier
ne ys
gom ery
Ġdes erved
Ġphr ases
ĠG C
Ġye ast
d esc
De ath
Ġreb oot
Ġmet adata
IC AL
Ġrep ay
ĠInd ependence
Ġsubur ban
ical s
Ġat op
Ġall ocation
gener ation
ĠG ram
Ġmoist ure
Ġp ine
ĠLiber als
Ġa ides
Ġund erest
ĠBer ry
Ġcere mon
3 70
ast rous
ĠPir ates
Ġt ense
ĠIndust ries
ĠApp eals
ĠN ear
Ġè£ı ç
Ġlo vers
ĠC AP
ĠC raw
Ġg iants
Ġeffic acy
E lement
ĠBeh avior
ĠToy ota
Ġint est
P riv
A I
Ġmaneu ver
Ġperfect ion
Ġb ang
p aper
r ill
Ge orge
b order
in ters
ĠS eth
Ġcl ues
ĠLe vi
ĠRe venue
14 7
Ġv apor
Ġfortun ate
Ġthreat ens
Ġve t
Ġdepend ency
ers ed
art icle
ĠBl izzard
Ġch lor
Ġmin us
ĠB ills
Ġcryptoc urrency
Ġmetabol ism
ter ing
Ġp estic
step s
ĠTre asure
ract ed
ĠConst ant
Ġtem p
13 9
ĠDet ective
ur ally
Ġrecover ing
Ġcort ex
Ġ14 4
cl osed
Ġprejud ice
aun ted
Ġstorm s
ĠN OW
Ġmach inery
Add ress
Ġcompe lled
27 0
Ġdesp air
b ane
Ġveget able
Ġbed s
Lear n
Ġcolor ful
Ġsp ike
Ġmarg ins
Ġsymp athy
Ġworks hop
ĠC BC
S at
Ġburn s
ĠG ender
Ġ12 9
ĠC able
Ġdeb ts
ĠThe resa
Ġreflect ing
Ġa irst
Ġr im
ram id
Ġweakness es
W rit
ogg le
t i
ĠCh arge
Ġwe ighed
Ġ( .
Ġl aughter
Ġrou ter
ĠDemocr acy
D ear
Ġhas ht
Ġd y
Ġhint s
run ning
Ġfin ishes
ar us
M ass
res ult
asc us
Ġv intage
Ġcon qu
Ġwild ly
ac ist
Ġl ingu
Ġprot agonist
st rom
te enth
ĠSol o
m ac
f illed
Ġre nown
it ives
Ġmot ive
ĠAnt ar
ĠM ann
ĠAd just
Ġrock ets
Ġtrou bling
e i
Ġorgan isms
ass is
Christ ian
Ġ14 5
ĠH ass
Ġsw all
Ġw ax
ĠSurv ival
V S
ĠM urd
v d
stand ard
Ġdrag ons
Ġacceler ation
r ational
f inal
Ġp aired
ĠE thereum
Ġinterf aces
Ġres ent
Ġartif acts
Å «
are l
Ġcompet itor
ĠNich olas
ĠSur face
c pp
ĠT ot
Ġeconom ically
Ġorgan ised
Ġen forced
in ho
Ġvar ieties
Ġab dom
ĠBa iley
id av
ĠSal v
p aid
Ġalt itude
ess ert
ĠG utenberg
are a
op oulos
Ġprofess ors
igg s
ĠF ate
he y
Ġ3 000
D ist
Ġtw ins
c ill
ĠM aps
Ġtra ps
Ġwe ed
ĠK iss
Ġy oga
Ġrecip ients
ĠWest minster
Ġpool s
ĠWal mart
18 8
ĠSchool s
att ack
ĠAR M
par agraph
W arning
j l
Ġself ish
anche z
ĠHe ights
F re
ĠS oph
Ġ --------------------------------
t ml
33 3
Ġraid s
Ġsatell ites
KE Y
Ġlast s
Ñ Ĥ
In s
ĠD ame
Ġunp redict
// /
gh ai
Ġart illery
Ġcru ise
Ġg el
ĠCabin et
Ġbl ows
ĠE sp
Ġprox imity
ot he
ĠSk ills
ĠU pper
ob o
ĠN DP
Ġenjoy s
Ġrepe ating
ĠConst ruction
ĠQuest ions
H illary
Ġu int
Ġprocess ors
ĠGib son
ĠMult iple
q a
ĠB om
ĠM iles
vent ional
Ġhur ts
s kin
ĠA IDS
Ġadvis ers
ĠR oot
Ġmethod ology
ĠD ale
Ġdet on
ĠKnow ledge
sequ ently
Ġ12 1
Ġconnect s
C y
ĠD anger
Ġcontribut ors
ĠB ent
Ġbr ass
ĠGun s
int o
ĠFort une
Ġbro ker
bal ance
Ġlength s
Ġv ic
Ġaver aging
Ġappropri ately
ĠCamer a
Ġsand wich
ĠCD C
Ġcoord inate
Ġnav ig
Ġgood ness
l aim
Ġbra ke
Ġextrem ist
ĠW ake
ĠM end
ĠT iny
ĠC OL
ĠR F
ĠD ual
ĠW ine
C ase
Ġref ined
Ġl amp
L ead
Ġb apt
ĠCar b
ĠS add
ĠMin neapolis
PD F
Ear ly
ĠH idden
I ts
ĠT IME
Ġp ap
Ġcommission ed
ĠF ew
ĠCol ts
ĠB ren
Ġbot hered
Ġlike wise
Ex per
ĠSch w
c ry
n n
ĠM itch
im on
M G
b m
UM P
r ays
Ġregist ry
Ġ2 70
ach ine
re lla
ant ing
00 000
Ġru ined
sp ot
Ġt a
Ġmaxim ize
Ġincon ven
D ead
H uman
En abled
ĠMar ie
Ġch ill
ĠParad ise
Ġstar ring
ĠLat ino
ĠProt ocol
ĠE VER
Ġsuppl iers
m essage
ĠBro ck
Ġser um
âĸĪâĸĪ âĸĪâĸĪ
Ġen comp
Ġamb ition
ues e
Ġar rows
And rew
Ġanten na
Ġ19 61
ĠB ark
Ġb ool
ãĤ ª
ĠSt orage
Ġrail way
Ġtoug her
ĠC ad
Ġwas hing
P y
' ]
em bed
ĠMem phis
ack le
Ġfam ously
ĠF ortunately
ov ies
Ġmind set
Ġsne ak
ĠD h
RA W
ĠSim pson
Ġliv est
Ġland mark
Ġc ement
L ow
Ġthr illed
ĠCour se
in el
Ġch uck
id ate
gl obal
Ġwh it
Ġ ï¿½
ad ays
s ki
ĠS V
Ġvir uses
30 6
ĠResp ons
Ġthe aters
ĠBr anch
ĠGene va
ĠM K
Ġunbel iev
Ġcommun ist
Orig inal
ĠRe ceived
ĠTrans fer
ĠAr g
In put
ĠStr ategy
Ġpal ace
the ning
D ri
Ġsent encing
umbn ail
Ġp ins
re cy
Ġs iblings
Get ting
ĠB U
ĠNorth west
Ġprolong ed
ĠSak ura
C omb
ĠB our
Ġinadequ ate
ĠK ash
Ġus ername
ĠImpro ve
Ġbatt ling
ĠM AC
Ġcurric ulum
Ġs oda
ĠC annon
Ġsens ible
sp ons
De cember
Ġw icked
ĠP engu
Ġdict ators
ĠHe arts
og yn
Ġsimilar ities
ĠSt ats
Ġh ollow
it ations
": [
Ġh over
ĠList en
s ch
S und
Ġc ad
ĠPar ks
Ġl ur
Ġhy pe
ĠL em
N AME
is ure
Fr iday
Ġshoot s
Ġclos es
Ġd b
ĠR idge
ĠDiff erent
Ġrepl ies
ĠBroad way
op ers
Ġint oler
ĠZe us
akes pe
Ġpropri etary
Ġrequest ing
Ġcontro llers
ĠM IN
im edia
be cca
Ġexp ans
Ġoil s
B ot
ĠCh and
Ġpr inter
Ġto pped
ĠP OL
ĠEar lier
S ocial
av in
Ġdecre ases
ĠSe b
Ġspecific ations
ĠBl ast
ĠK urt
Ġfre el
B rown
Ġdil ig
ro e
ĠPro blem
ĠQu ad
Ġdecent ral
ĠV ector
an ut
Ġplug ins
ĠGreg ory
Ġfuck ed
el ines
ĠAmb assador
t ake
Ġcle ans
ong yang
An onymous
st ro
" }
al ine
ĠO dd
ĠE ug
2 16
Ġbo il
ĠP owers
Ġnurs es
Ob viously
ĠTechn ical
Ġexceed ed
OR S
Ġextrem ists
Ġtr aces
ex pl
Ġcom r
ĠS ach
) /
Ġm asks
Ġsc i
B on
Ġreg ression
we gian
Ġadvis or
it ures
ĠV o
ex ample
ĠInst ruct
Ġs iege
Ġredu ctions
pt r
Ġstat utory
Ġrem oves
Ġp uck
red its
Ġbe e
Ġsal ad
Ġpromot ions
ĠJosh ua
with standing
ET H
ĠCh a
im us
Ġexpend iture
aun ting
Ġdelight ed
Ġ15 5
be h
Ġcar pet
ĠSp art
Ġj ungle
l ists
Ġbull ying
ĠNob el
ĠGl en
Ġreferen ced
Ġintrodu ces
se in
Ġcho pped
gl ass
ĠW rest
Ġneutral ity
Ġâ Ļ
Ġinvestig ator
Ġshel ves
Ġun constitutional
Ġreprodu ction
Ġmer chant
m ia
Ġmet rics
Ġexplos ives
ĠSon ia
Ġbod ily
Ġthick ness
Ġpredomin antly
ĠAb ility
Ġmon itored
IC H
Ġ] .
ĠMart inez
Ġvis ibility
Ġqu eries
Ġgen ocide
ĠWar fare
Qu ery
Ġstud ios
Ġemb ry
Ġcorrid or
Ġclean ed
com plete
ĠM H
Ġenroll ment
ING S
Ġimpact ed
Ġdis astrous
ĠY un
ĠCl aire
ĠBas ically
y t
uster ity
Ġindirect ly
w ik
Ġd od
ĠCar r
Ġam p
Ġprohib it
ĠIn itial
ĠR d
ij i
Ġeduc ate
c orn
i ott
ĠBeaut y
Ġdetect ive
ĠCon n
s ince
Ġst agger
Ġob ese
Ġb ree
olog ic
is se
walk er
Ġbl ades
Ġlaw ful
fun c
ĠBeh ind
Ġappet ite
Ġ( *
Ġt ennis
Ġoff spring
Ġj ets
Ġstruct ured
Ġafore mentioned
N ov
Ġsc aling
f ill
Ġst ew
Ġcur b
ĠStep han
ed In
S F
ob ic
é ŃĶ
ou g
ĠM M
Ġgen etically
ope z
13 6
Ġu mb
anc ers
Ġcoh ort
Ġmerch andise
Ġimp osing
ĠLegisl ature
ĠArch ive
iv ia
ĠN aval
Ġoff ences
Ġmir acle
Ġsn apped
Ġf oes
Ġextensive ly
ĠR af
Ġc ater
ed ience
K it
ĠB in
Ġrecomm ends
ĠC ities
Ġrig id
ĠRE AD
ĠNob le
ĠT ian
Ġcertific ates
ant is
o iler
ĠBudd hist
d id
Ġsurvey ed
Ġdown ward
Ġprint s
ĠMot ion
ron ics
ĠS ans
oss ibly
u ctions
Ġcolon ies
ĠDan ish
un it
Ġsp oil
Ġadvis ory
ber ries
Pl an
Ġspecific ation
op hers
ĠRes ource
Ġsh irts
prising ly
commun ications
Ġtriv ial
Ġmention ing
ise xual
Ġsupp lements
Ġsuper vision
B P
v or
Ġw it
Ġco oldown
Ġplaint iff
ĠReview s
ĠS ri
ĠM int
ĠSug ar
Ġafter ward
ĠPri est
ĠInvest ment
og ene
ĠT aking
Ġstretch ing
Ġinflamm ation
ĠTe hran
Ġl ining
Ġfree zing
ĠEnt ity
Ġins piring
spe cial
pr ice
Ġsu e
ĠP orter
oun ge
ET A
ĠD erek
ĠLu is
u o
ym ph
Ġex terior
ih il
ĠAsh ley
in ator
Ġnut rients
ĠTh rones
Ġfin ances
ĠIn spect
Ġspe cially
ĠRequ ired
ĠP TS
ĠViol ence
oint ed
sh ots
Ġex cerpt
co on
IN S
ĠG ri
Ġrecogn ised
We ek
You ng
Ġv om
is le
ĠCur ry
ĠBudd h
Ġnot ebook
Ġd urable
/ ?
ĠG ad
ĠP upp
Ġforg ive
p ark
Ġpersonal ities
an alysis
cl amation
Ġelev ator
Ġware house
ĠR ole
un n
Ġillust ration
ĠSc an
Ġatmosp heric
Im port
AN C
rict ed
f u
01 0
Ġar che
Ġreward ed
akespe are
Ġintern ally
ĠR BI
alk er
Ġeleph ant
ow itz
ĠP izza
Ġbip artisan
Ã© s
Ġslow ed
ĠSt ark
Ġover ride
OU S
Ġ3 20
undred s
ĠDe ck
ĠC ensus
be e
14 6
ot or
Ġ ip
Ġu b
oc ations
ĠBut ton
r ice
Ġc ripp
ff f
Ġorig inated
Ġoverwhel med
app a
Ġfore most
âĢ ĳ
ĠL EG
re lease
eat ured
at ches
Ġre ps
Ġl ending
ĠRe ference
ĠCl ient
16 5
vent h
Com plete
ĠPat rol
Ġsw orn
c am
Ġshut tle
ĠR alph
Ġh ometown
- ,
on al
ĠB P
å ı
Ġpersu ade
ĠAlex and
Ġcomb ines
Ġv ivid
ĠL ag
Ġenc oding
Ġsal vation
w en
ĠRec overy
i ya
Un iversity
ĠB iden
Ġbud gets
ĠTex ans
f its
Ġhon ored
Ġp ython
T D
## #
cl one
Ġbl ink
ĠL iquid
Ġunemploy ed
Ġcl ashes
ĠCoun sel
Ġdirect ing
Ġpun ct
ĠFal cons
Ġsh ark
ĠDam ascus
Ġje ans
Ġemb ark
Ġse ize
Ġup wards
2 80
ĠE z
ĠAny thing
Ġex otic
l ower
ĠCreat or
ĠU m
Ġsubur bs
ber ger
ĠW end
Ġm int
ĠX X
ĠD ro
Ġsuff ers
Ġher b
t ree
Ġfrag ile
Ġflood ed
ĠAl cohol
ole an
ny der
ĠK O
F ram
Ġ13 6
Ġow ed
ĠMe lee
ĠH ash
Ġwh isk
Ġsu do
r r
Qu ick
app ro
Ġi i
ĠEx amples
he e
Ġpromot es
per ature
k ar
ĠHon or
Ġs odium
ĠL if
ros so
intend ent
Ġcorrespond ent
F ound
sec ret
Ġident ifies
ag ne
Ġl ou
ĠP P
Ġcoinc idence
m ove
Ġmilit ia
Ġinf iltr
ĠPrim ary
Ġpitch ing
ĠI b
ĠGO OD
ãĤ ¸
ĠW izards
ir al
ĠVen us
R R
ĠâĢ ķ
ĠCase y
Ġsad ly
Ġadm ire
Ġembarrass ed
c b
M el
Ġtub es
Ġbeaut ifully
ĠQueens land
Bel ow
re z
qu et
ple asant
ĠÂ «
C amp
Ġdec isive
19 98
ĠL amb
ut ton
h n
ĠJ agu
au nder
ĠC ord
Ġcl erk
Ġca ffe
Ġwip ed
Ġre im
ĠMount ains
Ġimprison ed
Ġdevelop s
ĠP ra
Ġmodel ing
Any one
ance l
ĠS it
Ġshield s
Ġl awn
Ġcard iovascular
Ġdemonstr ating
Ġpar se
ĠIsrael is
Ġeuro s
14 3
Ġgl orious
ins ki
ec d
Ġcondition ing
Ġhel pless
Ġmicro sc
ĠHar bor
Ġst akes
Ġ2 60
Ġun equ
ĠFl oyd
Ġd amp
Ġappar atus
ĠLaw s
Ġcoun ters
Ġindu ce
at able
ĠAh med
Ġsl am
N ovember
Ġpers ist
Ġim minent
Ã¡ n
Ġsh red
Ġph ases
ĠEd monton
ĠArm strong
ĠMe et
ĠK itty
Ñ Ģ
c irc
ĠAd ult
Ġa rose
ĠX en
D an
g ow
Ġsuper f
ĠAd mir
Ġend ure
Ġkey word
yr us
Ġy arn
Ġpath way
ĠHop kins
mid t
Ġcens orship
d ependent
Ġinstruct or
S ources
Ġto e
Ġball oon
N ob
Ġsw ear
ĠCast ro
Ġgl oss
ĠK avanaugh
Ġremark ably
Ph otos
ĠN om
ĠS outheast
y ers
Ġvalid ation
Ġcann on
ĠVict ory
ĠPier re
Ġcaut ious
Aud io
Ġf etch
ĠG ift
ĠH yp
Ġrem edy
Z E
Ġsc ent
Ġbe ard
ĠR ut
- "
Ġpat ents
H y
Ġun just
Ġpot ato
Ġforth coming
Ġche f
ĠR ift
aff e
ĠR OM
ĠL aunch
Ġp ads
ĠNe o
Ġon set
Ġsquee ze
s afe
Ġpref ix
ĠT M
ĠN early
ĠClin ical
ĠM ental
ot iation
ĠUn ic
ant ry
ĠC ir
Ġep it
Ã ¦
Ġextract ed
verse ly
ri ad
Ġstr ains
Ġto ps
Ġpo em
ĠRand y
ĠMap le
TH ER
up iter
ĠSS D
ļ é
Ġun con
per ing
Ġsle pt
in ers
Ġunder water
ĠEv idence
g one
20 5
Ġhistor ians
Ġsynt hesis
Ġf rog
b asketball
Ġvibr ant
Ġsub ord
Ġ3 65
ĠD ial
Ġcooper ate
HA HA
Ġgreet ed
15 8
Ġj azz
Ġinto x
ĠWalk ing
Ġsuper visor
ĠF usion
ĠMer cedes
s end
H am
s d
n l
Ġtour s
ĠF IFA
Ġcul p
g d
30 4
Ġple as
Ġillust rates
ĠColomb ia
Ġhighlight ing
ĠSum mary
Ġexp osing
ĠD ru
Ġir ony
r itional
ĠCar roll
ĠEll is
P ict
ĠR apt
Ġad apter
Ġun m
Ġcor pse
Ġceleb rities
D en
at um
ĠAp ocalypse
ĠW ag
lin ing
Ġhorm ones
R ub
ĠX i
ĠV aults
20 8
alky rie
inos aur
Ġfeed s
v ity
Ġdefe ating
W ait
Ġemphas ize
ĠSteel ers
yr inth
le ys
ĠWhe never
Current ly
ĠCl ock
Ġcollect ively
any on
ĠJ P
Ġment ality
Ġdownload s
Ġsurround ings
ĠBarn es
Ġflags hip
Ġindic ators
Ġgra pp
Jan uary
ĠElement al
ĠAthen a
ib al
Ġs ights
Ġcap ita
ĠTreat y
Ġvo iced
ĠG az
let te
Ġy a
Ġexp ired
Leg end
H ot
n ature
Ġunst able
Ġ2 80
Ã º
Com ment
AL E
Ġquest s
Ġhand ler
n is
Ġvers atile
Ġconce al
enge ance
ĠInter active
Ġobs essed
ĠDog s
Ġcr acked
S ound
s v
ĠD ylan
ro ads
f x
ĠCath olics
ĠH ag
Ġsl ammed
Ġgl owing
s ale
Ġtiss ues
ĠCh i
ne e
Ġc her
s ic
ur rection
Ġb acon
ul atory
) ."
Ġir regular
FOR M
ass ed
Ġintention al
Ġcompens ate
ĠSpe aking
ĠS ets
15 3
Ġconvent ions
b ands
em ade
Ġe cc
ĠWin ston
ĠAssass in
ĠBelg ian
Ġdepend ence
Ġnic he
Ġb ark
ĠJ azz
Ġdisadvant age
Ġgas oline
Ġ16 5
çļ Ħ
ess a
mod ule
ang ular
O Y
ĠTreat ment
it as
ol ation
ĠArn old
Ġfe ud
ĠN est
Ġthe atre
ew ater
Ġmin ors
olic y
ĠH aven
div ision
Ġtr unk
F ar
ĠP ull
Ġcapt uring
Ġ18 00
ĠTe en
Ġex empl
Ġclin ics
ĠB urg
Ġsubst it
Ġpay load
ĠL av
ĠT roy
ĠW itness
Ġfrag ments
Ġpass words
Ġg ospel
ĠG in
Ġten ants
ol ith
S ix
Pre vious
ĠAg es
ĠDar win
Ġbl at
Ġem pathy
sm ith
b ag
ĠE cho
ĠC amb
ĠM add
ĠB oo
Ġred e
ĠBurn ing
Ġsmooth ly
ĠAd rian
ĠV ampire
ĠMon sters
ste am
Sty le
M a
re a
ĠD war
aly st
urs or
Ġelim ination
Ġcrypt o
ch t
ĠE ternal
âĢ¦ ]
ĠS orce
I ll
N ER
Ġu h
Con clusion
w age
Ġresp ir
Ġrem inis
het ical
Ġg y
Ġutil ized
ic idal
Ġ19 00
Ġhun ters
ĠSw an
ĠRe act
Ġvis itor
ĠThanks giving
30 8
Post s
Ġh ips
19 97
om ers
Ġkn ocking
ĠVeh icle
Ġt il
Ġ13 8
Ġm i
ĠInvest igation
ĠKen ya
Ġcas ino
Ġmot ives
Ġreg ain
re x
Ġweek ends
Ġstab bed
bor o
Ġexplo ited
ĠHA VE
ĠTe levision
c ock
Ġprepar ations
Ġende av
ĠRem ote
ĠM aker
ĠPro du
ĠEv an
Ġinform ational
ĠLouis ville
15 4
ĠDream s
Ġpl ots
ĠRun ner
Ġhur ting
Ġacad emy
ĠMont gomery
n m
ĠL anc
ĠAl z
2 10
el ong
Ġretail er
Ġar ising
Ġrebell ion
Ġbl onde
play ed
Ġinstrument al
C ross
Ġret ention
Ġtherape utic
Ġse as
Ġinfant ry
ĠCl int
Ġprompt ing
Ġbit ch
Ġst ems
ĠK ra
Ġthe sis
ĠB og
ru ed
Ġk ings
Ġcl ay
ific ent
ĠY ES
ĠTh ing
ĠCub s
vey ard
els h
in arily
ĠE y
ĠRoll ing
Ġev olving
Ind ia
Ġrecogn izes
Ġgrad uation
is ers
Ġfert ility
ĠMil an
Comm and
Ġbox ing
Ġ19 43
Ġgl uten
ĠEm ir
Ġid ol
Ġcon ceived
ĠCre ation
Mer it
udd y
uss ions
ĠLie utenant
iet al
Ġunch anged
ĠSc ale
ĠCrime a
ball s
ator ial
Ġdepth s
Ġempir ical
Ġtrans m
Ġuns afe
miss ible
com fort
15 6
Ġmechan ic
00 2
l ins
Ġsm oked
P os
Ġslow ing
Ġl av
Tex as
Ġche ating
ĠMet ropolitan
eth yl
Ġdiscover ing
as se
Ġpen cil
ĠPy ongyang
Ġclos et
ĠShe et
ĠEnt ry
ou stic
Ġmy st
er ate
ari at
Ġminer als
Ġmusic ian
ĠP ul
ĠM az
24 9
Ġper missions
Ġ iv
en ary
ick ers
ĠB ing
he a
en able
Ġgri ev
Ġassert ed
ĠColon el
Ġaff idav
w o
Ġse ated
ĠR ide
Ġpaint ings
ĠP ix
Ġ13 7
ish i
umb ai
g otten
ĠEar l
Ġin ning
Ġc ensus
Ġtrave lled
ĠCons ult
18 5
b ind
Ġsimpl icity
Ġoverlook ed
ĠHelp ful
Ġmon key
Ġoverwhelming ly
Bl ood
ĠFl int
ĠJ ama
ĠPres ent
ĠR age
ĠT A
pt ive
Ġturn out
w ald
ĠD olphins
ĠV PN
Ġon ion
Ġcraft ing
m ma
ĠMerc ury
Ġarr ange
Ġalert s
ĠO T
zb ollah
Ġg ases
ĠRichards on
s al
l ar
Ġfro st
Ġlower ing
Ġacc laim
Ġstart ups
ĠG ain
ess ment
Ġguard ian
äº º
ĠP ie
ĠL inks
Ġmer its
Ġaw ake
Ġparent al
Ġexceed s
Ġid le
ĠPil ot
Ġe Bay
ĠAc cept
ipe g
C am
ĠK ot
Ġtrad ers
olit ics
unk er
ĠP ale
os i
an mar
Ġ19 47
ĠF ell
est ial
it ating
G F
ĠS r
if ted
Ġconnect or
ĠB one
ill es
2 60
h ma
Ġoverl ap
ĠGit Hub
Ġclean er
ĠBapt ist
ĠW AS
Ġlung s
Ñ ģ
ĠB UT
Ġc ite
Ġpit ched
reat ment
Ġtro phies
ĠN u
38 6
ĠPr ide
Ġattend ees
[ ]
17 9
Ġspat ial
Ġpri zes
ĠRel igion
Ġshow case
ĠC ategory
vid ia
T arget
Pro perty
? ,
Ġf usion
p ie
ĠU CLA
Ġsound track
Ġprin cess
ĠC aval
sh ould
Ġlim bs
Back ground
Ġlone ly
Ġc ores
ĠT ail
she et
Ġ13 2
R a
ãĤ «
ĠB olt
Ġbook ed
Ġadmin ister
Ġequ als
w y
Ġobserv ing
ĠBar on
ĠAd obe
Ġv irgin
ĠSocial ist
M ove
gh azi
ĠLind a
2 12
Ġbre wing
Ġmerch ants
bur se
Ġdiv or
Ġmet als
ĠN er
Ġsum s
ĠEn emy
Ġen vision
Ġgrant ing
ĠH oney
ĠSk yrim
Ġsoc io
gr aded
Ġselect ive
W ASHINGTON
Ġ19 48
ĠSir ius
ĠG ross
act ivity
ĠI van
Ġfur ious
BS D
ĠPre vious
Ġrespons ive
Ġchar itable
Ġle aning
ĠP ew
Ġviol ates
\\\\ \\\\
ĠCom ing
w ire
Ġpo et
Ġres olutions
comm and
ĠPortug uese
Ġnick name
Ġde af
Feb ruary
Ġrecogn ise
Ġentire ty
Ġseason al
pl aced
ĠTe legraph
Ġmicro phone
our ing
Ġgr ains
Ġgovern ed
Ġpost p
ĠW aters
in ement
Ġund ocumented
ĠCom cast
Ġf ox
Ġassault s
re on
man y
ĠJen kins
ĠAny way
Ġassess ments
Ġdown s
ĠM ouse
Ġsuper b
k t
ĠD ow
Ġtax ation
4 01
Ġsm iles
Ġundert aken
Ġex h
Ġenthusi astic
Ġtw ent
Ġgovernment al
Ġautonom y
ĠTechn ologies
ĠCh ain
Ġpreval ent
f b
Ġnic otine
og ram
j ob
Ġawa iting
ĠMen u
Ġdep uties
k ov
ish ops
But ton
ĠShan ghai
Ġdies el
ĠD uck
R yan
ĠPC s
N F
j ury
ent e
Ġinacc urate
edd y
Wh atever
Ġshow c
ĠN ad
od us
et r
Ġplaint iffs
ĠW OR
ĠAss ange
Ġpriv at
Ġpremium s
Ġt am
UR L
Ġel ites
ĠR anger
otten ham
ĠH off
ĠAt hens
Ġdefin ite
Ġs ighed
Ġeven ly
2 11
ĠAm ber
ak ia
Ġmail ing
Ġcr ashing
ĠConfeder ate
ru gged
W al
ĠDep ths
Ġjuven ile
Ġreact or
Introdu ction
ĠDel uxe
19 95
ĠS anchez
ĠM ead
iv able
: -
ĠPlan ning
ĠT rap
qu in
ĠProt ect
ve red
In formation
Ġkid ney
inn amon
l as
Ġpolic ing
Ġtoler ate
ĠQ i
Ġbi ased
F ort
ĠK i
s ave
Ġprivile ged
Ġbe asts
ĠGl as
ĠC inem
Ġcome back
Sund ay
Ġext inction
h ops
Ġtrans mit
Ġdoub les
ĠFl at
16 7
Ġdis puted
Ġinjust ice
f oo
V ict
role um
ĠJul ie
Con text
ĠR arity
iss ue
Comp onent
Ġcounsel ing
an ne
d ark
Ġobject ions
u ilt
Ġg ast
Ġpl ac
Ġun used
ãĥ ĩ
ĠT rial
ĠJ as
hed ral
ob b
Ġtempor al
ĠPR O
ĠN W
ĠAnn iversary
L arge
Ġther m
Ġd avid
Ġsystem ic
ĠSh ir
m ut
ĠNe pt
add ress
Ġscan ning
Ġunderstand able
Ġcan vas
C at
ĠZ oo
Ġang els
L O
ĠStat ement
ĠS ig
ov able
ĠA way
sh aring
ocr ats
st ated
Ġweigh ing
N or
w ild
B ey
Ġaston ishing
ĠReyn olds
Ġop ener
Ġtrain er
Ġsurg ical
p n
Ġadjust ing
whe el
Ġf rown
erv ative
Ġsusp end
With in
te in
Ġobst acle
Ġliber ties
ym es
Ġur anium
ans om
an ol
ub a
ĠL oss
Ġa rous
ĠHend erson
W ow
s pl
c ur
ĠÂ Ń
Ġtheir s
Dam age
Ġdownload ing
Ġdisc ern
ĠSt o
ĠFl a
Ġh ath
ĠA j
Ġun pleasant
Europe an
exp ensive
Ġscreens hot
ĠU V
Ġall ied
ĠPers ian
Ġmonop oly
Ġat om
ĠReds kins
"> <
Ġcan cell
Ġcinem a
13 1
f air
ĠAlf red
Ġd uck
arg s
22 3
ĠIS I
Ġsign aling
in ar
Ġlaugh s
Ġfor wards
Ġreck less
Ġlisten ers
at ivity
Ġvast ly
n ant
L ess
ĠHun ting
ĠScient ific
IT ED
Ġkn ight
ĠH TC
us a
t mp
Ġr ude
ĠLegend ary
Ġar ises
B ad
ĠCl aim
pe g
Ġreal ities
Th ink
ĠÂ °
Ġro de
Ġstri ve
Ġan ecd
Ġshort s
Ġhypot hes
Ġcoord inated
ĠGand hi
ĠF PS
R ED
Ġsuscept ible
Ġshr ink
ĠCh art
Hel p
Ġ ion
de ep
rib es
ĠK ai
ĠCustom er
Sum mary
Ġc ough
w ife
Ġl end
Ġposition ing
Ġlot tery
ĠC anyon
Ġf ade
Ġbron ze
ĠKenn y
Ġbo asts
ĠEnh anced
rec ord
Ġemer gence
Ġa kin
ĠB ert
it ous
âĸ ĳ
Ġst ip
Ġexch anged
om ore
als h
Ġreserv oir
Ġstand point
W M
Ġiniti ate
Ġdec ay
Ġbrew ery
Ġter ribly
Ġmort al
lev ard
Ġrev is
N I
el o
Ġconf ess
ĠMS NBC
Ġsub missions
Cont roller
Ġ20 2
ĠR uth
} );
ĠAz ure
Ġ ."
20 6
ĠMarket ing
Ġl aund
ien cies
Ġrenown ed
ĠT rou
ĠN GO
ble ms
Ġterr ified
Ġwar ns
Ġper t
Ġuns ure
4 80
ale z
ult z
ĠOut side
Ġst yl
ĠUnder ground
Ġp anc
Ġd ictionary
Ġf oe
rim inal
ĠNor wegian
Ġj ailed
Ġm aternal
Ã© e
ĠLu cy
c op
Ch o
Ġuns igned
ĠZe lda
ĠIns ider
ĠContin ued
Ġ13 3
ĠNar uto
ĠMajor ity
16 9
ĠW o
ãĤ ĵ
Ġpast or
Ġinform al
Ð ½
an throp
jo in
ãģ Ĺ
it ational
N P
ĠWrit ing
f n
ĠB ever
19 5
Ġy elling
Ġdr astically
Ġe ject
Ġne ut
Ġth rive
ĠFre qu
ou x
Ġpossess es
ĠSen ators
ĠD ES
ĠSh akespeare
ĠFran co
ĠL B
uch i
Ġinc arn
Ġfound ers
F unction
Ġbright ness
ĠB T
Ġwh ale
ĠThe ater
m ass
ĠD oll
S omething
Ġecho ed
ĠHe x
c rit
af ia
Ġgodd ess
Ġele ven
ĠPre view
ĠAur ora
Ġ4 01
uls ive
ĠLog an
in burgh
ĠCent ers
ĠON LY
ĠA id
Ġparad ox
Ġh urd
ĠL C
D ue
c ourt
Ġoff ended
Ġeval uating
ĠMatthew s
Ġto mb
Ġpay roll
Ġextra ction
ĠH ands
if i
Ġsuper natural
ĠCOM M
] =
dog s
Ġ5 12
ĠMe eting
Rich ard
ĠMax imum
Ġide als
Th ings
m and
ĠReg ardless
Ġhum ili
b uffer
L ittle
ĠD ani
ĠN ak
Ġliber ation
ĠA be
ĠO L
Ġstuff ed
ac a
ind a
raph ic
Ġmos qu
Ġcampaign ing
Ġoccup y
S qu
r ina
ĠW el
ĠV S
Ġphys ic
Ġp uls
r int
oad ed
ET F
ĠArch ives
Ġven ues
h ner
ĠTur bo
Ġl ust
Ġappeal ed
que z
il ib
ĠTim othy
Ġo mn
d ro
Ġobs ession
ĠSav age
19 96
Gl obal
J es
2 14
Ġsl iding
Ġdisapp ro
ĠMag ical
Ġvolunt arily
g b
ane y
Ġprop het
ĠRe in
ĠJul ia
ĠW orth
aur us
Ġb ounds
ie u
)) )
Ġcro re
ĠCitiz en
S ky
Ġcolumn ist
Ġseek ers
ond o
IS A
ĠL ength
Ġnost alg
Ġnew com
Ġdet rim
ent ric
3 75
ĠG E
Ġaut op
Ġacadem ics
App Data
ĠS hen
Ġid iot
ĠTrans it
Ġteasp oon
W il
K O
ĠCom edy
> ,
Ġpop ulated
W D
Ġp igs
ĠO culus
Ġsymp athetic
Ġmar athon
19 8
Ġseiz ure
s ided
Ġd op
irt ual
L and
ĠFl oor
osa urs
... ]
Ġl os
Ġsubsid iary
E Y
ĠPart s
ĠSt ef
ĠJud iciary
Ġ13 4
Ġmir rors
Ġk et
t imes
Ġneuro log
Ġc av
ĠGu est
Ġtum or
sc ill
ĠLl oyd
E st
Ġcle arer
Ġstere otypes
Ġd ur
not hing
Red dit
Ġnegoti ated
---------------- --------
23 5
Ġfl own
ĠSe oul
ĠRes ident
ĠS CH
Ġdisappear ance
ĠV ince
g rown
Ġgrab s
r il
ĠInf inite
ĠTw enty
Ġpedest rian
Ġjer sey
ĠF ur
ĠInf inity
ĠEll iott
Ġment or
Ġmor ally
Ġob ey
sec ure
iff e
Ġantib iotics
ang led
ĠFre eman
ĠIntrodu ction
J un
Ġm arsh
ic ans
ĠEV ENTS
och ond
W all
icult y
Ġmisdem eanor
Ġl y
Th omas
ĠRes olution
Ġanim ations
ĠD ry
Ġinter course
ĠNew castle
ĠH og
ĠEqu ipment
17 7
Ġterrit orial
Ġarch ives
20 3
Fil ter
ĠMun ich
Ġcommand ed
ĠW and
Ġpit ches
ĠCro at
Ġrat ios
ĠM its
Ġaccum ulated
ĠSpecific ally
Ġgentle man
acer b
Ġp enn
Ġa ka
ĠF uk
Ġinterven e
ĠRef uge
ĠAlz heimer
Ġsuccess ion
oh an
d oes
L ord
Ġsepar at
Ġcorrespond ence
Ġsh iny
P rior
Ġs ulf
Ġmiser able
Ġded ication
( ).
Ġspecial ists
Ġdefect s
ĠC ult
ĠX ia
Ġje opard
ĠO re
Ab ility
Ġle ar
Ġamb itions
ĠB MI
ĠArab s
Ġ19 42
Ġpres ervation
ific ate
Ġash amed
l oss
ĠRest aur
Ġrese mble
Ġen rich
ĠK N
ĠCl an
fl oat
Ġplay able
IT T
Ġharm ony
arr ison
ĠWe instein
w ere
Ġpoison ing
ĠCom put
ĠWord Press
m ajor
ĠVal ve
F an
ĠTh row
ĠRom ans
ĠDep ression
ad os
Ġtort ured
Ġbal ancing
bott om
Ġacqu iring
ĠMon te
ard i
Ġa ura
Ġ# #
ĠStand ing
ĠAtl as
C F
Ġintr ins
ĠBen ghazi
Ġcamp ing
Ġt apped
bl ade
st rous
ĠR abb
ĠW ritten
t ip
ĠNe igh
ster dam
ĠAll ow
ĠHe aling
ĠR hod
n um
Ġcaffe ine
ĠPer cent
Ġbo o
Ġapp les
30 5
Ġwel coming
Ġappl aud
Ġa usterity
Â ±
ĠRe ality
ef e
å ®
Ġsu cks
Ġtab s
ĠPay Pal
Ġback pack
Ġgif ted
abul ary
ĠSc out
ir teen
Ġch in
Ġo mitted
Ġnegative ly
Ġaccess ing
ĠE arn
Ġambul ance
Ġhead phones
Ġ20 5
ĠRef resh
p resident
ĠKit chen
ĠEnt ered
ĠS nyder
00 5
om ical
Ġborrow ed
ĠN em
Ġav iation
Ġst all
rim ination
Ġuniform s
it ime
ĠSim mons
ener gy
ab lished
y y
qual ified
Ġrall ies
ĠSt uart
fl ight
Ġgang s
r ag
Ġv ault
lu x
ĠCom par
Ġdesign ation
20 9
ĠJ os
d ollar
z ero
Ġwell s
30 3
Ġconstitu ents
Ġhe ck
Ġc ows
Ġcommand ers
Ġdifferent ial
ĠC atherine
29 9
Ġval ve
Ġbr ace
Ġperspect ives
c ert
f act
icular ly
ĠMc N
pl anes
Ġint ric
Ġpe as
ov an
Ġtoss ed
ret ch
ĠL opez
Ġunf amiliar
de ath
ĠA part
ĠCh ang
Ġrelie ved
rop he
Ġair ports
Ġfre ak
ut il
M ill
ĠCh in
ĠOw en
m ale
ĠBro ken
ĠWind s
ro b
r ising
Ġfire fighters
Ġauthor itarian
Ġ14 8
Bit coin
ex ternal
Ġbrow sers
iche ver
or ian
Ġun b
Ġpo ke
ĠZ ot
M id
ĠPop ular
Ġco vert
Ġcont ributes
Ġ6 50
Ġcont ention
G ate
Ġcons oles
Ġchrom os
ĠI X
Ġvis ually
ĠE isen
Ġjewel ry
Ġdeleg ation
Ġacceler ate
ĠR iley
Ġsl ope
Ġind oor
it ially
Ġhuge ly
Ġtun nels
Ġfin ed
Ġdirect ive
Ġfore head
ustom ed
Ġsk ate
Mus ic
g as
Ġrecogn izing
am bo
Ġover weight
ĠGr ade
Ù Ĭ
Ġsound ing
Ġlock ing
ĠR EM
St ore
Ġexc av
ĠLike wise
ĠL ights
Ġel bow
ĠSupp ly
w ic
Ġhands ome
19 94
C oll
Ġadequ ately
ĠAssoci ate
Ġstri ps
Ġcrack down
Ġmar vel
ĠK un
Ġpass ages
@@ @@
ĠT all
Ġthought ful
names e
Ġprost itution
bus iness
Ġball istic
person al
c ig
iz ational
R ound
ĠÂłĠÂł ĠÂłĠÂł
ĠCole man
Ġadm itting
ĠPl ug
Ġbit coins
ĠSu z
Ġfair ness
Ġsupp lier
Ġcatast rophic
ĠHel en
o qu
M arc
ĠArt icles
g ie
Ġend angered
Ġdest iny
ĠVol t
ol ia
ax is
Ġche at
Ġun ified
IC O
qu ote
30 2
ĠS ed
Ġsupp ression
Ġanaly zing
Ġsqu at
Ġfig uring
Ġcoordin ates
Ġch unks
Ġ19 46
Ġsub p
Ġw iki
ĠFor bes
ĠJ upiter
ĠE rik
im er
ĠCom mercial
\ )
Ġlegitim acy
Ġd ental
ĠMe an
Ġdefic its
5 50
Orig inally
ĠHor ror
Ġcontam ination
ll ah
Ġconf isc
ĠCl are
T B
ĠF ailed
an ed
Ġrul er
ĠCont roller
Ġfemin ists
F ix
g ay
20 7
Ġr abbit
Th ird
ownt own
Ġgl ue
Ġvol atile
Ġsh ining
Ġf oll
Ġimp aired
Ġsup ers
æ Ī
Ġcl utch
ļé ĨĴ
Ġpro let
Ġ( !
Ġy elled
ĠK iev
ĠEr n
ĠSh ock
K B
Ġsit uated
qu ery
ĠN as
Ġan nex
char acter
ĠHol iday
Ġautom ation
ĠJ ill
ĠRem astered
Ġl inem
Ġwild erness
ĠHor izon
ĠGu inea
A Z
Ġmain land
Ġsec recy
LE ASE
Ġp unk
ĠProv ince
( ),
Spe ed
Ġhand ing
ĠSeb ast
S ir
r ase
Ġj ournals
Ġcon gest
ĠT ut
ir rel
Ġschizophren ia
Ġmis ogyn
health y
I ron
Ġreact ed
- $
25 2
Ġpl ural
Ġpl um
Ġbarg ain
Ġground ed
f inder
Ġdis se
ĠL az
O OD
Ġat roc
F actory
Ġmin ions
Ġo ri
ĠB rave
ĠP RE
ĠMy anmar
ĠH od
Ġexped ition
Ġexpl ode
ĠCo ord
Ġext r
ĠB rief
ĠAD HD
Ġhard core
feed ing
Ġd ile
ĠF ruit
Ġvacc ination
ĠM ao
osp here
Ġcont ests
- |
Ġf ren
isp here
R om
ĠSh arp
ĠTre nd
Ġdis connect
âĢ¢ âĢ¢
Ġper secution
Ear th
Ġhealth ier
38 4
Ġc ob
ĠTr inity
OW S
AN N
Ġspecial ty
Ġg ru
Ġcooper ative
wh y
Start ing
ĠIss ues
st re
ens or
Ġ18 5
Ad v
! ?
ĠRe vel
em ia
ĠH ulk
Ġcelebr ations
ĠS ou
ra ud
ĠKle in
Ġun real
con text
Ġpartners hips
Ġadop ting
t ical
Ġspl ash
ĠHe zbollah
c ategory
cycl op
xt on
ĠD ot
urd y
t z
Ġenvelop e
ĠN L
â ķ
Ġwhere in
Spe c
18 4
Ġte lev
al iation
Ġmyth s
å °
Ġrig orous
Ġcommun icating
Ġobser ver
Ġre he
ĠW ash
Ġapolog ized
ĠT in
Ġexpend itures
work ers
d ocument
Ġhes itate
ĠLen in
Ġunpredict able
Ġrenew al
cl er
ok ia
ĠCON T
Ġpost season
Tok ens
Ġex acerb
Ġbet ting
Ġ14 7
Ġelev ation
W ood
ĠSol omon
19 4
00 4
out put
Ġredu nd
ĠM umbai
Ġp H
Ġreprodu ce
ĠD uration
MA X
Ġb og
C BS
ĠBal ance
ĠS gt
ĠRec ent
Ġc d
Ġpo pped
Ġincomp et
pro p
ay an
g uy
Pac ific
Ġty r
Ġ{ {
ĠMy stic
ĠD ana
Ġmast urb
Ġge ometry
Ã ¢
ĠCor rect
Ġtraject ory
Ġdistract ed
Ġf oo
ĠW elsh
L uc
m ith
Ġrug by
Ġrespir atory
Ġtri angle
Ġ2 15
Ġunder graduate
ĠSuper ior
ch anging
_ -
Ġright ly
Ġrefere e
Ġluc rative
Ġun authorized
Ġresemb les
ĠGN U
ĠDer by
Ġpath ways
ĠL ed
Ġend urance
Ġst int
Ġcollect or
F ast
Ġd ots
Ġnational s
ĠSec urities
Ġwh ip
Par am
Ġlearn s
M agic
Ġdetail ing
m oon
Ġbroadcast ing
Ġb aked
26 5
hol m
ĠS ah
ĠHus sein
ĠCourt esy
17 4
Ġ14 6
Ġge ographic
pe ace
Ġjud ging
ĠS tern
B ur
Ġstory line
G un
ĠSt ick
24 5
30 7
ãĤ´ ãĥ³
ĠAdminist rator
Ġbur nt
Ġp ave
ch oes
Ex ec
Ġcamp uses
Res ult
Ġmut ations
ĠCh arter
Ġcapt ures
Ġcomp ares
Ġbad ge
S cient
Ġer ad
ier y
o i
ett es
ĠE state
Ġst rap
Ġproud ly
Ġf ried
Ġwithd rawn
ĠV oy
ph ony
It ems
ĠP ierce
b ard
Ġann otation
ant on
ill on
Im pro
... )
Ġhapp ier
---- --
ad just
Ġstaff ers
Ġactiv ism
Ġper f
Ġal right
N eed
Ġcomm ence
Ġopio id
ĠAm anda
E s
ĠP ars
ĠK aw
W orks
24 8
Ġind o
t c
end ant
ĠM oto
Ġlegal ization
OT E
Ġtask ed
Ġt sp
ĠACT IONS
16 6
Ġrefres hing
ĠN R
ĠPere z
Ġinfring ement
S Y
List en
in ning
k u
Ġrot ate
pro gram
ar ah
Des ign
Ġ( Â£
Ġst oring
Ġwar rants
Ġjud gement
ĠB rist
us ually
ph oto
ĠR an
ĠP ine
Ġoutrage ous
ĠValent ine
lu ence
ĠEvery body
Al tern
Ġrele vance
Ġtermin ated
Ġd essert
Ġfulf illed
Ġprosecut ed
ĠW ords
Ġm igrant
Ġcultiv ation
ÃĥÃĤÃĥÃĤÃĥÃĤÃĥÃĤÃĥÃĤÃĥÃĤÃĥÃĤÃĥÃĤ ÃĥÃĤÃĥÃĤÃĥÃĤÃĥÃĤÃĥÃĤÃĥÃĤÃĥÃĤÃĥÃĤ
idel ity
ĠV ern
ĠLog in
Ġmetaph or
ĠT ip
Ġrecru its
ĠP ig
rib ing
Ġenthusi asts
ex per
Ġfright ening
ĠH air
ans on
str ate
Ġh i
He ight
Ġown ing
n one
Ġdis like
Ġkn ives
pher d
Ġloud ly
ĠAP Is
Dis play
ĠL ac
ĠUS S
ab l
ver ages
J ew
Ġ17 2
ĠHist orical
at oon
ĠPhys ics
in tern
Ġwarm th
Ġto pp
D M
Ġgun man
Ġem peror
od i
ãĥ £
in atory
ĠR ib
Ġ13 1
ĠSat urn
ĠSh ining
Ġw aking
Qu otes
Ġcomed ian
en berg
Â ½
Ġbelie vers
Ġpaper work
c ustom
Ġle v
Ġl ament
Ġpour ing
22 2
p olitical
ĠSupp lement
m aid
Ġcruel ty
Ġt read
ys ics
A w
rit es
Ġmod ifier
ĠP osition
Ad am
l b
ub s
Ġimper fect
Ġcl usters
ĠEngine er
ĠC herry
Ġinaug uration
ĠS au
Ġembod iment
ĠUn cle
Ġover r
Ġexplos ions
c ule
ĠPrinc eton
ĠAndre a
Ġincorrect ly
Ġearn est
Ġpil gr
ĠS print
Ġslee ve
Ġhe ars
ĠAm azing
Ġbrow sing
ag in
Ġhom eland
Ġha w
Ġd iving
ist ered
17 8
Ġbarg aining
ĠArc ade
Ġdeleg ate
ters on
................................ ................................
ĠJackson ville
27 5
Ġst agn
Ġad am
ĠSher man
C B
Ġsub urb
ĠFood s
Ġconver ting
ĠAr ist
Ġch ambers
l ove
Ġam ino
ĠG an
Ġmad ness
m c
ĠUS E
def ined
Ġul tr
ind ust
Ġw olves
l ance
Add itionally
Ġcr acks
as ia
ĠRe ason
ĠP ump
Ġaccident al
ĠL aser
ĠR id
Ġinitial ized
ell i
Ġun named
Ġn oun
ĠPass ed
Ġhost age
ĠEth iop
sh irts
Ġun rel
ĠEmb assy
Ġ19 41
Ġat oms
Ġpur ported
16 4
ĠF i
Ġgall ons
ĠMon ica
Ġp g
en ment
Ġsort ed
ĠG ospel
Ġhe ights
Ġtr aced
Ġunder going
She ll
Ġs acks
Ġproport ions
Ġhall uc
F ont
ac et
Ġwar mer
ĠIN TER
Ġgrab bing
Pl ug
Ġreal ization
ĠBur ke
Ġen chant
AT ER
ĠSe ed
Ġabund ant
F M
Ġc ivic
V s
is i
Ġv ow
Ġre per
ĠPartners hip
Ġpenet ration
Ġax e
Ġsh attered
ĠZ ombies
Ġv inyl
ĠAl ert
e on
Ġoblig ed
ĠIll ust
ĠPl aza
ĠFront ier
Ġdavid jl
ĠSer ial
ĠH av
ĠNut rition
B i
Ġâĸ Ī
ĠJ ays
lin ux
Ġhur ry
Ġv oy
Ġhop eless
ĠSte alth
Ġ ãģ
ess ors
tt le
b org
ĠSaf ari
f ell
Ġw ary
d ue
ĠAb ove
H a
E LL
Ġnot or
ĠW on
T oo
Ġoccup ations
Ġposs essions
Ġinv iting
Ġpred ators
Ġacceler ated
Ġ15 7
uter te
ĠC ube
e ast
acc ount
G ive
Ġtrans plant
red ients
id able
Ġscreens hots
ĠG und
ĠF S
Ġtravel ers
Ġsens ory
ĠF iat
ĠRock ets
İ ĭ
_ {
F riend
Ġchar ming
AL S
Ġenjoy ment
m ph
Ġ5 000
ĠRE G
Ù Ĩ
b ia
Ġcomp ilation
ro st
ĠV P
ĠSch ne
201 9
Ġcop ying
M ORE
ĠFl ore
f alls
2 15
t otal
Ġdis ciples
d ouble
Ġexceed ing
Ġsm ashed
Ġconcept ual
ĠRom ania
ĠB rent
ĠI CE
ĠT ou
Ġg rap
Ġn ails
18 9
ãĥ ĺ
Ġproc ure
e ur
Ġconfir ming
ĠC ec
aw i
ĠEd en
Ġn g
Ġengine ered
at ics
Ġhook ed
Ġdisgust ing
ĠMur der
ãĤ ¿
L ibrary
Ġ16 8
Al most
hem atic
Men u
ĠNot re
ĠJ ur
Ġkidn apped
Ġhack er
ĠJ ade
Ġcreep y
Ġdraw ings
ĠSpons or
Ġcycl ists
ĠGob lin
Ġoptim ized
Ġst aged
ĠMc D
bet ween
A ge
en o
S ex
ĠW ide
n ings
av is
Ġincap able
ĠK ob
Ġreward ing
ĠL one
oles cent
Ġcontract ed
Ġstick y
J ose
B all
f est
ĠIn put
ĠRec ently
Ġto mat
squ are
App lication
Ġnit rogen
Ġdupl icate
ĠRec on
ĠD ear
L ondon
Ġint ra
Ġd ock
Ġout reach
ĠM illion
Ġmamm als
am pton
V AL
Ġsn aps
Ġd os
ĠWh ole
ĠRead y
T ry
ĠWinn ipeg
ear ance
Ġinc urred
ren ched
ĠNS W
il ot
rain e
Ġc ube
g ot
Ġrun way
etermin ed
ĠHaw ks
Ġsurviv or
ĠW ish
ĠD in
ĠDE F
ĠV ault
18 7
Ġmush rooms
Ġcris p
be y
ĠDisco very
Ġdevelopment al
Ġparad igm
Ġcha otic
ĠT su
Ġ3 33
b ons
Ġbacter ial
Ġcomm its
Ġcos mic
Ġme ga
oc ative
ĠP aint
ophob ic
Ġv ain
Ġcar ved
ĠTh ief
ĠG ul
ows hip
Ġc ites
ĠEd inburgh
Ġdimin ished
Ġacknowled ges
ĠK ills
Ġmic row
ĠHer a
Ġsen iors
Ġwhere by
H op
at ron
Ġun available
ĠN ate
Ġ4 80
Ġsl ated
ĠRe becca
ĠB attery
Ġgram mar
Ġhead set
Ġcurs or
Ġex cluding
any e
aunder ing
eb in
Ġfeas ible
ĠPub lishing
ĠLab s
ĠCl iff
ĠFerr ari
Ġp ac
vis ible
mark ed
pe ll
Ġpol ite
Ġstagger ing
ĠGal actic
Ġsuper st
Ġpar an
ĠOffic ers
ãĢ ģ
Ġspecific s
ul us
23 9
ĠP aste
AM P
ĠPan ama
ĠDe lete
angu ard
rest rial
Ġhero ic
ĠD y
Ø§ ÙĦ
Ġincumb ent
Ġcr unch
t ro
Ġsc oop
Ġblog ger
Ġsell ers
ure n
Ġmedic ines
ĠC aps
ĠAnim ation
ox y
Ġout ward
Ġinqu iries
22 9
Ġpsych ologist
ĠS ask
ev il
Ġcontam inated
ãĤ ¨
he rence
Ġbrand ed
ĠAbd ul
z h
Ġparagraph s
Ġmin s
Ġcor related
er b
Ġimp art
Ġmil estone
ĠSol utions
ot le
Ġunder cover
Ġmar ched
ĠCharg ers
f ax
ĠSec rets
Ġr uth
we ather
Ġfemin ine
Ġsh am
Ġprest igious
igg ins
Ġs ung
hist ory
ett le
gg ie
Ġout dated
ol and
Ġper ceptions
ĠS ession
ĠDod gers
u j
ĠE ND
D oc
Ġdefic iency
Gr and
ĠJ oker
Ġretro spect
Ġdiagn ostic
Ġharm less
Ġro gue
ĠA val
E qu
Ġtrans c
ĠRoberts on
ĠDep ending
ĠBurn s
iv o
Ġhost ility
F eatures
ĵ ĺ
Ġdis comfort
ĠL CD
spec ified
ĠEx pect
3 40
Ġimper ative
ĠReg ular
Ch inese
Ġstate wide
Ġsy mm
Ġlo ops
Ġaut umn
N ick
Ġsh aping
Ġqu ot
Ġc herry
ĠCross ref
è¦ ļéĨĴ
Stand ard
he ed
ĠD ell
ĠViet namese
Ġo st
ĠV alkyrie
O A
Ass ad
Ġreb ound
ĠTra ffic
pl aces
æ ĺ
ĠB uc
17 2
Ġshel ters
Ġins isting
ĠCertain ly
ĠKenn eth
ĠT CP
Ġpen al
ĠRe play
he ard
Ġdial ect
iz a
ĠF Y
it cher
ĠD L
Ġspir al
Ġquarterback s
Ġh ull
Ġgo ogle
Ġto dd
ĠSter ling
ĠPl ate
Ġsp ying
mb ol
ĠReal m
ĠPro ced
ĠCr ash
Ġtermin ate
Ġprotest ing
C enter
gu ided
Ġun cover
Ġboy cott
Ġreal izes
s ound
Ġpret ending
ĠV as
19 80
Ġfram ed
Ġ13 9
Ġdesc ended
Ġrehab ilitation
Ġborrow ing
ĠB uch
Ġbl ur
R on
ĠFro zen
en za
Ch ief
ĠP oor
Ġtransl ates
M IN
Ġ2 12
J ECT
Ġerupt ed
Ġsuccess es
S EC
Ġpl ague
Ġg ems
d oms
Ġstret ches
ĠSp y
Ġstory telling
C redit
ĠP ush
Ġtra ction
Ġin effective
ĠL una
Ġt apes
Ġanaly tics
erc ise
Ġprogram mes
ĠCar bon
Ġbeh old
he avy
ĠConserv ation
ĠF IR
Ġs ack
ter min
ric ks
Ġhous ed
Ġunus ually
I ce
Ġexecut ing
ĠMor oc
ed ay
Ġed itions
Ġsm arter
ĠB A
Ġout law
Ġvan ished
ib a
AL SE
ĠSil va
23 8
C ould
Ġphilos opher
Ġevac uated
Sec ret
14 2
Ġvis as
ãĤ ¬
ĠM alt
ĠClear ly
ĠN iger
ĠC airo
ĠF ist
3 80
ĠX ML
aut o
it ant
Ġrein forced
Rec ord
ĠSurviv or
G Hz
Ġscrew s
parent s
Ġo ceans
ma res
Ġbra kes
vas ive
Ġhell o
ĠS IM
rim p
Ġo re
ĠArm our
24 7
Ġterr ific
Ġt ones
14 1
ĠMin utes
Ep isode
Ġcur ves
Ġinflamm atory
Ġbat ting
ĠBeaut iful
L ay
Ġunp op
v able
Ġr iots
ĠTact ics
b augh
ĠC ock
Ġorg asm
ĠS as
Ġconstruct or
et z
G ov
Ġant agon
Ġthe at
Ġde eds
ha o
c uts
ĠMc Cl
Ġu m
ĠScient ists
Ġgrass roots
ys sey
"] =>
Ġsurf aced
Ġsh ades
Ġneighb ours
Ġad vertis
oy a
Ġmer ged
Up on
Ġg ad
Ġanticip ate
Any way
Ġsl ogan
Ġdis respect
I ran
ĠT B
act ed
Ġsubp oen
medi ately
OO OO
Ġwa iver
Ġvulner abilities
ott esville
ĠHuff ington
J osh
ĠD H
M onday
ĠEll en
K now
x on
it ems
22 8
Ġf ills
ĠN ike
Ġcum ulative
and als
I r
Ġ ì
Ġfr iction
ig ator
Ġsc ans
ĠVi enna
ld om
Ġperform ers
P rim
Ġb idding
M ur
Ġlean ed
ĠPri x
al ks
Ġ[ âĢ¦]
ĠTw itch
ĠDevelop er
ĠG ir
Ġcall back
Ab stract
Ġacc ustomed
Ġfreed oms
ĠP G
ur acy
Ġl ump
is man
,, ,,
19 92
ĠR ED
Ġwor m
M atch
ĠPl atinum
I J
ĠOwn er
Tri via
com pl
Ġnew born
Ġfant as
O wn
Ġ19 59
Ġsymp ath
Ġub iqu
Ġoutput s
Ġal lev
Ġpr ag
K evin
Ġfav ors
Ġbur ial
Ġn urt
so lete
c ache
Ġ15 6
Ġunl ocks
te chn
M aking
Ġcon quer
ad ic
æ ĸ
Ġel f
Ġelect orate
ĠKurd s
ĠSt ack
ĠSam urai
Ġâ ĺħ
Ġ{ }
ĠS aid
ĠFall out
Ġkind ness
ĠCustom s
ĠBou levard
Ġhelicop ters
ot ics
ĠVe get
com ment
Ġcritic ised
Ġpol ished
ĠRem ix
ĠC ultural
Ġrec ons
Ġdo i
at em
Sc reen
Ġbar red
Com ments
ĠGener ally
Ġsl ap
7 20
V ari
p ine
Ġem pt
Ġh ats
ĠPlay ing
l ab
a verage
form s
ĠC otton
Ġcan s
ĠD ON
ĠSom alia
C rypt
ĠIncre ases
E ver
mod ern
Ġsur geon
3 000
Ġrandom ized
================================ ================================
B ern
im pl
ĠC OR
Ġpro claim
th ouse
Ġto es
Ġam ple
Ġpres erving
Ġdis bel
gr and
B esides
Ġsil k
ĠPat tern
h m
Ġenter prises
Ġaffidav it
ĠAdvis ory
Ġadvert ised
ĠRel igious
se ctions
psy ch
ĠField s
aw ays
Ġhasht ag
ĠNight mare
Ġv ampire
Ġfore nsic
rosso ver
n ar
Ġn avy
Ġvac ant
ĠD uel
Ġhall way
Ġface book
ident ally
ĠN RA
Ġm att
Ġhur ricane
ĠKir by
ĠP uzzle
Ġsk irt
ou st
du llah
Ġanal ogy
in ion
Ġtomat oes
ĠN V
ĠPe ak
ĠMe yer
Ġappoint ments
Ġm asc
Ġal ley
re hend
Ġchar ities
Ġund o
Ġdest inations
ĠTest ing
"> </
Ġdest ined
Ġimp lements
ĠHar old
RE CT
Ġoptim ization
Ġkilomet res
Ġc md
Ġimpair ment
Ġun successful
Ġswift ly
ĠGlas gow
art en
ĠSh ares
ĠAn swer
ĠAl bum
Ġnut ritional
ãĥ ĸ
ĠF ut
Ġbl oc
ĠN FC
Ġwholes ale
ĠC W
Ġneg lected
Ġlaun cher
Ġannounce ments
OU LD
com b
Ġrot ating
Ġrest s
ĠT icket
ched el
L ou
ĠV ic
Ġ" '
Ġtem plates
Ġrepl aces
Ar c
:: ::
ĠGil bert
Ġillness es
Ġsched ules
Ġheter osexual
L INE
Ġhere in
Ġco erc
Ġdecre asing
Ġde portation
s udo
ĠInd igenous
Ġweigh s
Al ong
' );
ĠBeng als
70 7
Ġjoint s
ver ts
Ġ14 9
na ire
Ġsimpl est
Ġl ore
10 80
f iction
ĠDat abase
Ġreserv ation
Ġs ou
Ġsan ctuary
aud io
ap le
Ġveget arian
Ġanticip ation
m icro
Ġend uring
Ġdepart ed
Ġsidew alk
Ġprohib its
ĠF ont
Ġcomp ute
ĠS ect
Ġ15 8
B attle
Ġbom ber
Ġdist raction
Ġend ured
Ġpractition ers
Ġdistur bed
Ġdr ank
ord ered
Ġsurpr ises
se at
Sec urity
ĠW isdom
og o
Ġsub paragraph
ĠPen insula
ĠOrig ins
ire n
ĠP av
igg le
Ġgrat itude
ĠG ravity
over ty
im an
ct r
ĠCa esar
c ould
g em
Ġsk ies
Ġch amp
Ġagree ing
F amily
D iv
17 6
Ġmess y
um ption
F ederal
ern o
ĠCh at
Bey ond
Ġdev ote
ĠW alsh
Ġdump ed
Ġaccum ulation
st ad
hib ition
Ġsm okers
Ġinspect or
F rench
iss an
ĠV ita
Ġresearch ing
R AM
ĠCelt ics
Ġcl oak
ĠTer ra
M ary
so ld
ĠD OM
mod s
Int el
Ġmult itude
ĠImpro ved
Ġrel iance
Ġartif act
Ġalarm ing
P rom
h on
T ION
med ium
Ġref lex
ĠEx cel
Ġweaken ed
16 3
2 24
Ġcost umes
Ġunique ly
Ġs orrow
Ġm ansion
w p
Ġsal v
ĠGro ve
bs p
ĠSn iper
ĠSh ipping
ĠP OW
Ġund is
Ġbrand ing
G irl
ĠAh mad
ĠL akes
ĠCore y
Ġinherit ance
ener y
Ġpack ing
ĠP rest
D est
F W
Ġregul ator
l ocked
Ġcont ested
ĠMel issa
ĠD uc
Ġunpop ular
Ġst acked
Ġ19 17
Ġyear ly
Ġst are
Ġassess ing
Ã ¸
Ġbe verages
Ġcompet itions
Ġstreng thening
al ong
ĠL ud
Ġmel ted
stan bul
Ġb ounty
EN C
ĠL ands
Ġdecl ares
Ġcustom ize
Ġcomp osite
ãĥ ¬
C M
ograph ics
ĠTem p
Ġcont ender
Ġins ign
ĠL AN
Ġdis asters
ins pired
Ġjud gments
ustain able
urs ion
Ġvar iance
ĠUlt imately
Ġ --------
u ador
ĠR X
Ġmel ting
ĠExt ended
ĠT we
M ajor
ĠB il
Ġsy rup
qu ick
ĠHold er
Ġinnoc ence
U LE
ĠM ight
99 99
Ġf al
Ġcontinu ity
Ġ19 53
ĠB S
st ill
L at
ĠAb use
Ġun supported
xxxx xxxx
Ġinst itute
Ġfrag ment
ĠP ep
W estern
ĠC ause
ĠFr ag
ĠAr s
à ¥
ast ics
Ġb ishop
Ġcross es
Ġ15 4
ĠUp grade
Ġmit igate
ĠRay mond
Mod s
Ġtom ato
Ġst umbled
Ġdiff ers
In itial
ĠR aspberry
Ġign ores
Ġt ant
Ã ł
Ġrel ay
Ġb isexual
Ġconf ession
Ġd ement
in as
ĠHe ather
pl atform
dri ving
bour g
ĠM ush
Ġhy ster
Det ails
Ġdr ift
ĠW ald
ĠLuck ily
or f
Ġexp ire
ĠP unch
zy me
g old
Ġunp aid
ĠT rent
Ġun armed
Ġill icit
ĠT ottenham
Ġsm ash
Intern ational
ink er
Ġst ing
ĠSadd am
ĠAR T
Ġtruth s
b irth
Ġso ber
ĠN it
Ġ ib
Ġus able
Ġst acks
ĠSy lv
Ġnort heast
Ġdom ination
ĠM our
EN SE
ĠMe asure
Ġprogram mer
Ġ< -
18 2
ĠCond ition
Ġback yard
ir ling
ĠJ eb
ĠCre ed
ĠH ang
ĠCOM P
F ER
ĠIs h
Ġdetect ives
------------ ---
ĠMess enger
Ġlo oph
Ġgate way
15 1
ĠMaterial s
ĠD T
Ġdo omed
od o
Ġslic es
Ġemail ed
ĠPer l
Ġren ov
UT H
ody nam
ĠSouth west
get ic
ĠT PP
Ġoptim ism
ĠT ow
ul ators
prot ected
y les
Â «
Ġex ile
en v
P rop
ĠZimmer man
Ù İ
C a
om aly
ãĥ Ĩ
Ġrail road
L ee
23 2
Ġrepl icate
Ġcomfort ably
act ly
Ġr av
Ġtelesc ope
Ġhonest y
ĠPe pper
ĠBr ing
Ġric hest
Ġout doors
Ġh alls
Ġcont end
IS E
Ġsub mitting
Ġna ive
ar ations
Ġ14 3
Ġpo ised
respons ible
Ġsoc ks
ĠSk ull
Quest ion
Ġdiscover ies
Jo ined
ĠEn emies
ĠWire less
ĠRe venge
Ġpuzz les
Ġce ased
29 0
cript ions
ĠCon sole
Ġbo iling
Ġdisc rep
Ġded uction
Ġar senal
XX XX
ĠAm sterdam
rox imately
ĠSh ane
Ġpos ing
ĠACL U
ĠCompan ies
Ġthe ology
ĠU g
qu arter
ĠH ank
Co in
ĠL v
Ġalleg ation
ĠAv oid
Ġindef initely
Ġcommod ities
Ġbr ig
ĠMan it
Ġt enth
met hod
ĠKn icks
ĠâĢ İ
Ġinv oked
D ial
AR A
Ġc aucus
22 7
ĠJ ab
Ġoun ces
b ay
Ġbud dy
f an
23 4
ĠH il
ad h
ĠT Y
ĠIN D
Ġ19 39
Ġiter ation
ĠGonz alez
ĠV ert
ĠI O
em b
re ra
en ch
ĠRequ irements
ĠW ins
Ġlivest ock
h ours
" âĢ¦
b ral
M arg
ĠD one
Ġwas ting
ing ed
g roups
Ġw ishing
ĠT umblr
Ġt apping
Ġnational ism
ĠB yr
Ġsqu ares
ĠAct ions
ãĥ ¥
In side
deb ug
Ġapp end
Ġstub born
ĠC ind
T ell
Ġt earing
ĠRe y
or c
ĠDay ton
ĠN H
ĠMad ness
Ch arl
ĠMor rison
fil ter
Ġacc use
Ġ. /
Ġtor rent
Ġdecl ines
g allery
M ine
Ġneg otiation
ĠBash ar
op ia
19 93
em ort
ĠNo vel
ĠF ang
ers ive
ĠInst ant
Ġroll er
A round
ĠElect ions
G ames
Ġin expensive
Ġwor s
Ġv ul
ĠH ole
Ġunbeliev able
Ġn ause
Ġent r
bo at
ĠST E
Ġbus h
ĠHass an
Ġw o
Ġpa used
ĠM ig
l ived
Ġsc out
Ġl ith
Pub lished
du ino
c ool
Ġcirc ulating
id as
ĠP am
viol ent
ĠCraw ford
udd le
ĠLet ters
Gu ard
mor ph
Ġwand ering
Ġsoph omore
Ġque er
ĠBl ind
r ue
ĠMar riage
D om
Ġpadd ing
Ġfold ers
Ġmeaning less
Ġcandid acy
af ort
Ġwhistle bl
ĠIdent ified
Ġcig ar
Ġh id
ĠDub ai
Ġpost ure
Ġh iking
ĠTermin al
Legend ary
ĠT P
ĠAT K
ĠStar bucks
ĠR iot
19 91
ĠBott om
e ffic
ĠEug ene
ĠWy oming
ĠRock y
Ġsal mon
Ġmet ro
Ġb ilateral
Ġcelebr ates
L ength
b illion
B at
Ġre leg
Ġpse udo
D T
ĠRh ode
P arent
ple tion
Ġatt ribut
Ġtun ing
ĠNOT E
ĠRe bel
ic us
F und
Ġcock tail
Ġ5 01
Ġsp oon
Ġbrut ality
Ġun ite
Ġmicro bi
ĠRe ich
pos itive
Ġam azed
ĠN T
D esc
ECT ION
Ġfalse ly
ĠHigh lander
ĠC rist
ĠVictor ian
Ġdistribut ions
the ir
ĠE instein
Ġp od
Ġepid em
Ġhe ap
ĠR anch
Ġan them
Ġre app
ĠAub urn
Ġconc urrent
ĠThrough out
ĠP OST
â ĺ
Ġhom emade
k ick
B eg
Ġch assis
c ounter
Ġmer ger
Ġl aps
2 17
un ion
ĠTr igger
Ġdeb ated
Ġsil ently
Ġrest raint
B al
0000 000
Ġform idable
ĠFil ip
Ġsacrific es
F ood
Ġdwar f
ĠSe qu
in ian
More over
Ġtang ible
ops is
ĠMine craft
ĠRegist ration
o an
Ġrepresent ations
Ġth irst
Ġcor p
ire ment
M ade
l oe
> "
c ats
* .
Ġgest ures
gener al
Le ague
Ġpack ets
ĠInspect or
ĠBer g
Ġfraud ulent
Ġcritic ize
F un
Ġbl aming
nd ra
Ġsl ash
ĠE ston
Ġpropos ing
Ġwh ales
Ġtherap ist
Ġsub set
Ġle isure
EL D
ĠC VE
ĠAct ivity
Ġcul min
sh op
ĠD AY
is cher
ĠAdmir al
ĠAtt acks
Ġ19 58
Ġmem oir
Ġfold ed
Ġsex ist
Ġ15 3
ĠL I
Ġread ings
Ġembarrass ment
ĠEmploy ment
w art
ch in
Ġcontin uation
l ia
Rec ently
Ġd uel
Ġevac uation
ĠKash mir
Ġdis position
ĠR ig
Ġbol ts
Ġins urers
4 67
M ex
Ġret aliation
Ġmis ery
Ġunre asonable
r aining
I mm
ĠP U
em er
Ġgen ital
ãĤ ³
ĠC andy
Ġon ions
ĠP att
lin er
Ġconced ed
Ġf a
Ġfor c
ĠH ernandez
ĠGe off
deb ian
ĠTe ams
Ġc ries
Ġhome owners
23 7
A BC
Ġst itch
Ġstat istic
Ġhead ers
ĠBi ology
Ġmot ors
ĠG EN
ĠL ip
Ġh ates
Ġhe el
S elf
i pl
ED IT
ort ing
Ġann ot
ĠSpe ech
old emort
ĠJ avascript
ĠLe Bron
Ġfoot print
Ġf n
Ġseiz ures
n as
h ide
Ġ19 54
ĠBe e
ĠDecl aration
ĠKat ie
Ġreserv ations
N R
f emale
Ġsatur ated
Ġb iblical
Ġtroll s
Dev ice
ph otos
Ġdr ums
ãĥīãĥ© ãĤ´ãĥ³
N ight
f ighter
ĠH ak
ri ber
Ġc ush
Ġdiscipl inary
ba um
ĠG H
ĠSch midt
ilib rium
Ġs ixty
ĠKush ner
ro ts
Ġp und
ĠR ac
Ġspr ings
Ġcon ve
Bus iness
F all
Ġqual ifications
Ġvers es
Ġnarc iss
ĠK oh
ĠW ow
ĠCharl ottesville
ed o
Ġinterrog ation
ĠW ool
36 5
B rian
Ġâľ ĵ
Ġalleg es
ond s
id ation
ĠJack ie
y u
Ġl akes
Ġworth while
Ġcryst als
ĠJud a
Ġcomp rehend
Ġfl ush
Ġabsor ption
ĠO C
Ġfright ened
ĠCh ocolate
Mart in
Ġbu ys
Ġbu cks
Ġapp ell
ĠChampions hips
Ġlist ener
ĠDef ensive
Ġc z
ud s
ĠM ate
Ġre play
Ġdecor ated
Ġs unk
ĠV IP
ĠAn k
Ġ19 5
aa aa
Nob ody
ĠMil k
ĠG ur
ĠM k
ĠS ara
Ġse ating
ĠW id
Tr ack
Ġemploy s
Ġgig antic
AP P
ãĤ §
in ventory
Ġtow el
at che
l asting
ĠT L
Ġlat ency
Ġkn e
B er
me aning
Ġup held
Ġplay ground
Ġm ant
S ide
Ġstere o
Ġnorth west
Ġexception ally
Ġr ays
Ġrec urring
D rive
Ġup right
Ġab duct
ĠMar athon
Ġgood bye
Ġal phabet
h p
Ġcourt room
ring ton
ot hing
T ag
Ġdiplom ats
Ġbar bar
ĠAqu a
18 3
33 33
Ġmat urity
Ġinst ability
ĠAp ache
Ġ= ==
Ġfast ing
ĠGr id
Mod Loader
Ġ15 2
A bs
ĠOper ating
ett i
Ġacqu aint
Don nell
ĠK em
ĠFor ge
Ġarm ored
M il
Ġphilos ophers
in vest
Pl ayers
â Ī
Ġmy riad
Ġcomr ades
R ot
Ġremember ing
Ġcorrespond s
Ġprogram mers
ĠLyn n
Ġo lig
Ġco herent
yn chron
ĠChem ical
Ġj ugg
p air
post s
E ye
ĠIn ner
Ġsem ester
ott est
ĠEmir ates
ric anes
or ously
m its
ĠW is
Ġd odge
l ocation
Ġf aded
Am azon
ĠPro ceed
ĠIN FO
j ournal
ĠTru ck
T en
Ġ2 17
Ġstat utes
m obile
ĠT ypes
Rec omm
b uster
pe x
Ġleg ends
Ġhead ache
f aced
ĠWi Fi
if ty
ĠH ER
Ġcirc uits
ER ROR
22 6
ol in
Ġcyl inder
osp ace
ik ers
P rem
Qu ant
Ġconflic ting
Ġslight est
Ġfor ged
ion age
Step hen
ĠK ub
ĠOpp ortun
ĠHe al
Ġbl o
Ġrul ers
Ġh uh
Ġsubmar ine
f y
ass er
Ġallow ance
ĠKas ich
ĠT as
ĠAustral ians
Forge ModLoader
ĠâĨ ĳ
ĠMat rix
am ins
Ġ12 00
ĠAc qu
23 6
D ocument
ĠBre aking
19 3
ĠSub st
ĠRoll er
ĠPro perties
ĠN I
t ier
Ġcr ushing
Ġadvoc ating
Further more
keep ers
Ġsex ism
x d
Ġcall er
ĠS ense
chie ve
ĠT F
Ġfuel ed
Ġreminis cent
Ġobs ess
ur st
Ġup hold
ĠF ans
het ics
Ġâ Ĺ
ĠB ath
Ġbe verage
Ġo scill
25 4
Ġpol es
Ġgrad ual
Ġex ting
ĠS uff
ĠS uddenly
Ġlik ing
Ġ19 49
un ciation
am ination
ĠO mar
ĠL V
ĠCon sequently
Ġsynt hes
ĠG IF
Ġp ains
Ġinteract ing
u ously
inc re
Ġrum or
ĠScient ology
19 7
ĠZ ig
Ġspe lling
ĠA SS
Ġexting u
ms on
Ġg h
Ġremark ed
ĠStrateg ic
ĠM ON
å ¥
g ae
ĠWH AT
E ric
ĠCamp us
Ġmeth ane
Ġimag in
J UST
ĠAl m
X T
i q
ĠR SS
Ġwrong doing
att a
Ġbig ot
Ġdemonstr ators
ĠCal vin
ĠV illa
Ġmembr ane
ĠAw esome
Ġbenef ic
26 8
Ġmagn ificent
ĠL ots
G reg
ĠBor is
Ġdetain ees
ĠH erman
Ġwhis pered
Ġa we
Prof essor
fund ing
Ġphys iological
ĠDest ruction
Ġlim b
Ġmanip ulated
Ġbub bles
Ġpse ud
Ġhyd ra
ĠBrist ol
Ġst ellar
ĠExp ansion
ĠK ell
ĠInterest ingly
Ġm ans
Ġdrag ging
Ġec ological
ĠF it
Ġg ent
Ġbenef ited
ĠHait i
Ġpoly g
ãĥ İ
Ġ20 30
Ġpro w
Ġrecon struction
Ġwas t
Ġpsych ic
ĠGree ks
Hand ler
16 2
ĠP ulse
Ġsol icit
Ġsy s
Ġinflu x
ĠG entle
per cent
Ġprolifer ation
Ġtax able
Ġdisreg ard
Ġesc aping
Ġg inger
Ġwith stand
Ġdevast ated
ĠD ew
ser ies
Ġinject ed
ela ide
Ġturn over
he at
Ļ Ĥ
H appy
ĠSil ent
ãĤ Ń
iv ism
Ġir rational
AM A
Ġre ef
r ub
Ġ16 2
Ġbank ers
ĠEth ics
v v
Ġcritic isms
K n
18 6
M ovie
ĠT ories
Ġno od
Ġdist ortion
F alse
od ore
Ġt asty
Res earch
ĠU ID
- )
Ġdivor ced
ĠM U
ĠHay es
ĠIs n
ian i
ĠH Q
Ġ" #
ign ant
Ġtra umatic
ĠL ing
H un
Ġsab ot
on line
r andom
Ġren amed
ra red
K A
d ead
Ã© t
ĠAss istance
Ġse af
++++ ++++
Ġse ldom
ĠWeb b
Ġbo olean
u let
Ġref rain
ĠDI Y
ru le
Ġshut ting
Ġutil izing
load ing
ĠPar am
co al
oot er
Ġattract ing
ĠD ol
Ġher s
ag netic
ĠRe ach
im o
Ġdisc arded
ĠP ip
01 5
Ã¼ r
Ġm ug
Im agine
C OL
Ġcurs ed
ĠSh ows
ĠCurt is
ĠSach s
spe aking
ĠV ista
ĠFram ework
ong o
Ġsub reddit
Ġcr us
ĠO val
R ow
g rowing
Ġinstall ment
Ġgl ac
ĠAdv ance
EC K
ĠLGBT Q
LE Y
Ġac et
Ġsuccess ive
ĠNic ole
Ġ19 57
Qu ote
Ġcircumst ance
ack ets
Ġ14 2
ort ium
Ġguess ed
ĠFr ame
Ġperpet rators
ĠAv iation
ĠBen ch
Ġhand c
A p
Ġ19 56
25 9
r and
Net Message
d in
urt les
h ig
ĠV III
ff iti
ĠSw ords
b ial
Ġkidn apping
dev ice
Ġb arn
ĠEl i
auc as
S end
Con structed
ĠÂ ½
Ġneed les
Ġad vertisements
Ġv ou
Ġexhib ited
ĠFort ress
As k
B erry
TY PE
Ġcan cers
ump ing
ĠTerrit ory
Ġpr ud
Ġn as
Ġathe ist
Ġbal ances
ãģ Ł
ĠSh awn
& &
Ġland sc
ĠR GB
Ġpet ty
Ġex cellence
Ġtransl ations
Ġpar cel
ĠChe v
E ast
ĠOut put
im i
Ġamb ient
ĠTh reat
Ġvill ains
Ġ5 50
IC A
Ġtall er
Ġle aking
c up
Ġpol ish
Ġinfect ious
ĠK C
Ġ@ @
back ground
Ġbureaucr acy
ĠS ai
un less
it ious
ĠSky pe
At l
ID ENT
00 8
Ġhyp ocr
Ġpit chers
Ġguess ing
ĠF INAL
Bet ween
Ġvill agers
Ġ25 2
f ashion
ĠTun is
Be h
ĠEx c
ĠM ID
28 8
ĠHas kell
19 6
ĠN OR
Ġspec s
Ġinv ari
Ġgl ut
ĠC ars
Ġimp ulse
Ġhon ors
g el
Ġjurisd ictions
ĠBund le
ul as
Calif ornia
ĠIncre ase
Ġp ear
Ġsing les
Ġc ues
Ġunder went
ĠW S
Ġexagger ated
Ġdub ious
Ġfl ashing
L OG
) ].
J ournal
t g
V an
ĠI stanbul
ĠIn sp
ĠFrank en
D raw
Ġsad ness
Ġiron ic
ĠF ry
x c
Ġ16 4
is ch
W ay
ĠProtest ant
h orn
Ġun aff
ĠV iv
ill as
ĠProduct ions
ĠH ogan
Ġper imeter
ĠS isters
Ġspont aneous
Ġdown side
Ġdescend ants
Ġor n
w orm
Japan ese
Ġ19 55
Ġ15 1
ĠDo ing
els en
umb les
Ġrad ically
ĠDr um
ĠB ach
Ġli abilities
ĠO B
ĠElement ary
Ġmem e
yn es
Ġfinger print
ĠGr ab
Ġundert ake
Mem bers
ĠRead er
ĠSim s
g od
Ġhypot hetical
s cient
ĠA J
Ġchar ism
Ġad missions
ĠMiss ile
tr ade
Ġexerc ising
ĠBack ground
W ritten
Ġvoc als
whe ther
Ġv i
ĠW inner
Ġl itter
ĠSh ooting
ST EM
ãĤ ¡
ĠA FL
Ġvari ability
Ġe ats
ĠD PS
b row
Ġeleph ants
Ġstr at
Ġ Å
Ġsett lers
Matt hew
Ġin advert
H I
ĠIM F
ĠGo al
Ġnerv es
John son
ey e
ablish ment
Th ursday
BIL ITY
H ad
am oto
het amine
ep s
Ġmit ochond
Ġcomp ressed
ĠTre vor
ĠAnim als
T ool
L ock
Ġtwe ak
Ġpin ch
Ġcancell ation
P ot
Ġfoc al
ĠAst ron
17 3
ĠA SC
ĠO THER
umn i
Ġdem ise
d l
Ù ħ
Sem itism
Ġcr acking
Ġcollabor ative
Ġexpl ores
s ql
Ġher bs
Ġconfig urations
m is
ĠRes ult
ace y
ĠSm oke
Ġsan ct
el ia
Ġdeg ener
Ġdeep est
Ġscream ed
Ġn ap
Soft ware
ĠST AR
E F
ĠX in
spons ored
mans hip
23 3
Ġprim aries
Ġfilter ing
Ġas semble
m il
ĠMy ers
b ows
Ġpun ched
M ic
Ġinnov ations
Ġfun c
and o
Ġfr acking
ĠV ul
Ð¾ Ð
osh op
ĠIm mun
Ġsett ling
Ġadolesc ents
Ġreb uilding
Ġtransform ing
Ġpar ole
Ġhar bor
Ġbook ing
ot ional
onge vity
ĠY o
b ug
Ġemer ges
ĠMethod s
ĠCh u
P res
ĠDun geons
Ġtra iling
ĠR um
ĠH ugh
å¤ ©
ĠE ra
ĠBatt les
Res ults
ĠTr ading
Ġvers a
c ss
ax ies
he et
Ġgre ed
19 89
Ġgard ens
Ġconting ent
P ark
ĠLeaf s
h ook
ro be
Ġdiplom acy
ĠF uel
ĠInv asion
Ġupgr ading
M ale
Ġe lic
Ġrelent less
ĠCo venant
ap esh
ĠT rop
T y
pro duction
art y
Ġpun ches
ak o
cyclop edia
ĠR abbit
ĠHD MI
Ġ14 1
Ġf oil
Item Image
ĠF G
Ġimplement ations
ĠP om
ixt ures
Ġaw ait
Ġ3 30
am us
Ġumb rella
Ġfore see
se par
Ġcircum cision
Ġperipher al
S ay
ĠExper t
In c
Ġwithd rew
ĠAnd ers
f ried
Ġradio active
ĠOp ening
Ġboard ing
ĠN D
Ġover throw
Act iv
W P
ĠAct s
× Ļ
Ġmot ions
v ic
ĠM ighty
ĠDef ender
a er
Ġthank ful
ĠK illing
ĠBr is
mo il
Ġpredict ing
26 6
ch oice
Ġkill ers
Ġinc ub
ĠChe st
ather ing
Ġpro claimed
fl ower
oss om
umbled ore
ĠCy cling
ĠOccup y
AG ES
P en
ĠY ug
Ġpack aged
Ġheight ened
c ot
st ack
C ond
Ġst amps
m age
Ġpersu aded
Ġens l
ĠCard inal
Ġsol itary
Ġpossess ing
ĠC ork
Ġev id
ĠT ay
Ġbl ues
Ġextrem ism
Ġlun ar
Ġcl own
Te chn
Ġfest ivals
ĠPv P
ĠL ar
Ġconsequ ently
p resent
Ġsom eday
ç İĭ
ĠMet eor
Ġtour ing
c ulture
Ġbe aches
S hip
c ause
ĠFl ood
ãĥ ¯
Ġpur ity
th ose
Ġem ission
b olt
Ġch ord
ĠScript ure
L u
Ġ$ {
cre ated
Other s
25 8
Ġelement al
Ġannoy ed
ĠA E
d an
ĠS ag
Res earchers
Ġfair y
âĢĵ âĢĵ
======== ====
Sm art
GG GG
Ġskelet ons
Ġpup ils
link ed
Ġur gency
en abled
ĠF uck
Ġcoun cill
r ab
U AL
T I
Ġlif es
Ġconf essed
B ug
Ġharm on
ĠCON FIG
ĠNe utral
D ouble
Ġst aple
ĠSH A
Brit ish
ĠSN P
AT OR
oc o
Ġswing ing
ge x
ole on
pl ain
ĠMiss ing
ĠTro phy
v ari
ran ch
Ġ3 01
4 40
00000000 00000000
Ġrest oring
Ġha ul
uc ing
ner g
Ġfut ures
Ġstrateg ist
quest ion
Ġlater al
ĠB ard
Ġs or
ĠRhod es
ĠD owntown
????? -
ĠL it
ĠB ened
Ġco il
st reet
ĠPort al
FI LE
ĠG ru
* ,
23 1
ne um
Ġsuck ed
Ġr apper
Ġtend encies
ĠLaure n
cell aneous
26 7
Ġbrow se
Ġover c
head er
o ise
Ġbe et
ĠG le
St ay
Ġm um
Ġtyp ed
Ġdiscount s
T alk
ĠO g
ex isting
ĠS ell
u ph
C I
ĠAust rian
ĠW arm
Ġdismiss al
Ġaver ages
c amera
Ġalleg iance
L AN
=" #
Ġcomment ators
ĠSet ting
ĠMid west
Ġpharm ac
ĠEX P
Ġstain less
Ch icago
Ġt an
24 4
Ġcountry side
ĠV ac
29 5
Ġpin ned
Ġcr ises
Ġstandard ized
T ask
ĠJ ail
ĠD ocker
col ored
f orth
" },
Ġpat rons
Ġsp ice
Ġm ourn
ĠM ood
Ġlaund ry
Ġequ ip
ĠM ole
y ll
ĠTH C
n ation
ĠSher lock
Ġiss u
ĠK re
ĠAmeric as
ĠA AA
Ġsystem atically
Ġcont ra
ĠS ally
Ġrational e
Ġcar riage
Ġpe aks
Ġcontrad iction
ens ation
ĠFail ure
Ġpro ps
Ġnames pace
Ġc ove
field s
ãĤ ĭ
Ġw ool
ĠC atch
Ġpresum ed
ĠD iana
r agon
ig i
Ġh amm
Ġst unt
ĠG UI
ĠObserv atory
ĠSh ore
Ġsmell s
ann ah
Ġcock pit
ĠD uterte
8 50
Ġopp ressed
bre aker
ĠCont ribut
ĠPer u
ĠMons anto
ĠAtt empt
Ġcommand ing
Ġfr idge
ĠR in
ĠChe ss
ual ity
Ġo l
Republic an
ĠGl ory
ĠW IN
.... ...
ag ent
read ing
Ġin h
J ones
Ġcl icks
al an
Ġ[ ];
ĠMaj esty
ĠC ed
op us
ate l
Ã ª
AR C
ĠEc uador
ãĥ ł
ĠK uro
Ġritual s
Ġcapt ive
Ġoun ce
Ġdisag reement
Ġsl og
f uel
P et
M ail
Ġexerc ised
Ġsol ic
Ġrain fall
Ġdev otion
ĠAss essment
Ġrob otic
opt ions
ĠR P
ĠFam ilies
ĠFl ames
Ġassign ments
00 7
aked own
Ġvoc abulary
Re illy
Ġc aval
g ars
Ġsupp ressed
ĠS ET
ĠJohn s
Ġwar p
bro ken
Ġstat ues
Ġadvoc ated
Ġ2 75
Ġper il
om orph
ĠF emin
per fect
Ġh atch
L ib
5 12
Ġlif elong
3 13
Ġche eks
Ġnum bered
ĠM ug
B ody
ra vel
We ight
ĠJ ak
ĠHe ath
Ġkiss ing
ĠJ UST
Ġw aving
u pload
Ġins ider
ĠPro gressive
ĠFil ter
tt a
ĠBe am
Ġviol ently
ip ation
Ġskept icism
Ġ19 18
ĠAnn ie
ĠS I
Ġgen etics
Ġon board
at l
ĠFried man
ĠB ri
cept ive
Ġpir ate
ĠRep orter
27 8
Ġmyth ology
Ġe clipse
Ġsk ins
Ġgly ph
ing ham
F iles
C our
w omen
Ġreg imes
Ġphotograp hed
K at
ĠMA X
Offic ials
Ġunexpected ly
Ġimpress ions
F ront
;;;; ;;;;
Ġsuprem acy
Ġs ang
Ġaggrav ated
Ġabrupt ly
ĠS ector
Ġexc uses
Ġcost ing
ide press
St ack
ĠR NA
ob il
Ġghost s
ld on
at ibility
Top ics
Ġreim burse
ĠH M
ĠDe g
Ġth ief
y et
ogen esis
le aning
ĠK ol
ĠB asketball
Ġf i
ĠSee ing
Ġrecy cling
Ġ[ -
Cong ress
Ġlect ures
P sy
Ġne p
Ġm aid
Ġori ented
A X
Ġrespect ful
re ne
fl ush
ĠUn loaded
re quest
gr id
ĠAltern atively
ĠHug o
Ġdec ree
ĠBuddh ism
and um
And roid
ĠCong o
ĠJoy ce
Ġacknowled ging
hes ive
ĠTom orrow
ĠH iro
th ren
ĠM aced
Ġho ax
ĠIncre ased
ĠPr adesh
W ild
____ __
16 1
Ġa unt
Ġdistribut ing
ĠT ucker
ĠSS L
ĠW olves
B uilding
ou lt
ĠLu o
ĠY as
ĠSp ir
ĠSh ape
ĠCamb od
ĠIP v
Ġm l
Ġext rad
39 0
ĠPenn y
d ream
Ġstation ed
opt ional
ew orthy
. </
Ġundert aking
Ġchick ens
Ġstimul i
ĠEl se
ig ators
ĠBegin ning
ct ory
Ġprep ares
Ġdel ta
Ġvic inity
t ool
Ġworks hops
M Hz
Ġaccus ation
Ġhist ories
rop olis
ĠChurch ill
Ġne on
Ġb aff
d ies
may be
Ġè£ı è¦ļéĨĴ
Ġsympt om
EC H
ĠMan uel
Ġban ana
ĠH B
Ġ ****
ĠKore ans
c oll
F B
Ġpr aying
ĠCann ot
ĠM ile
Ġembr acing
ĠSil k
39 3
ot ers
F D
Ġday light
al ias
ĠBrig ade
ĠHann ah
Ġcler gy
Ġs outheast
Ġalcohol ic
Ġpropos es
liv ion
Ġcalcul ating
Ġstim ulate
Ġspl itting
e ight
ĠInd y
pl ays
ĠP ik
Ġdom est
Ġforg iveness
ĠR ings
pat ient
kins on
M ont
ig ible
; "
Ġperiod ically
amm ad
ĠBr itt
p ard
Ġarbit ration
ĠSchne ider
ĠCorpor ate
ĠMay a
Ġsn akes
a um
Ġbl asted
Ġmyster ies
Ġrev ive
oc amp
ĠD odge
ĠOper a
27 9
Ġor phan
Ġspec ifies
ĠM ets
D uration
H en
Ġfire works
Ġprosec ute
ĠTill erson
d p
us age
l iness
ĠDeb ian
Ġ2 24
ris es
ĠIn fect
at ra
ĠR R
ĠL or
d iff
ĠCharl eston
Ġac oustic
Ġam use
3 30
Ġc er
ĠT ac
Ġ[ +
Ġcard iac
ĠRestaur ant
er gy
Ġf uzz
Ġbit es
Ġhazard ous
Ġbr ighter
r ans
ĠStephan ie
ext ra
RE T
ĠChrist ine
ĠS ue
stat ement
Ġbol ster
Ġant it
Rad io
B IT
ãĤ °
Ġvis ions
ĠCon cept
Ġin line
ĠPhilos ophy
is ans
ĠIr ving
Ã £
t aking
Ġincons ist
ĠKum ar
Ġl ig
ĠSch umer
ĠReg ulations
ĠH z
th ro
ĠV oldemort
ĠM ED
ĠFreder ick
P ad
22 1
Ġalleg ing
ĠCommun ication
Ġ16 7
Ġforecast s
Ġsp iders
Or gan
ĠParticip ants
ĠO ps
des ign
Cl ose
Ġfact o
Ġbom bers
res istant
ateg ories
S chool
Ġhom ework
Ġcor ro
T uesday
ĠBrend an
ĠM X
ĠT S
ĠSt ri
Ġstake holders
ĠMillenn ium
Ġtransfer ring
J ud
Ġt ac
Ġ16 00
ĠSD K
r b
Ġinterpret ations
ĠS G
Ġup stairs
ĠHar vest
Ġvag ina
Ġing est
x f
ĠOr ion
ĠJoe y
Ġsand wic
Ġimm ortal
Ġfl ipped
ort ex
threat ening
Ġsn iper
Ġconver ts
Ġinstall ations
ĠBul gar
ors che
m ails
Ġl ure
Ġnarrow ly
Ġgren ade
ĠG ing
Ġunder wear
------------ --
Ġch ased
ĠV AL
Ġparent ing
ĠH amb
ĠBl az
Ġanarch ist
ĠMed ian
ĠProgram s
Î ½
Ġob j
ĠN okia
orm an
an qu
at ism
op a
Ġfulf illing
Ġpupp y
Ġent it
ĠSebast ian
Ġshoot ers
Ġric her
è ¡
Ġtempt ed
ĠAT T
ĠC V
Ġto re
Res ource
ĠDevil s
40 8
in ational
Ġass urance
ĠDar ren
Ġwh ichever
pos ure
Ġf ury
St ock
Ġunivers ally
resp onse
Ġo ak
Ġwork load
ĠCor ner
ee le
" ...
Ġdepri ved
k owski
Ġcast s
Ġaffili ation
ĠA ch
ĠAs ked
at he
Ġl act
ĠTh u
r m
Ġair lines
Ġnot ions
Form at
ĠF AA
ãĥ Ĭ
dri ver
Ġtrans cend
S ettings
ĠPro secut
Ġsp inal
Ġdefault s
F K
Ġpref ers
rend ered
th us
fil m
Ġt iger
ĠSp icer
rec ogn
ĠRug by
Net work
Ġp ity
Ġcomp artment
c asters
ĠMon roe
Ġ7 20
Ġcorrect ions
Ġdop amine
ĠA Z
C ut
Ġro omm
Ġspec ulate
H ash
Ġrestrict ive
11 11
red ible
on el
Ġramp ant
re ported
ĠSu ite
ĠMin imum
al ys
az ard
lo op
Ġl ent
sh a
Ġv andal
men u
ĠBoe hner
Ġnarr atives
Ġauthent icity
26 9
an ic
d uty
28 5
Ġthank ed
Ġbetray ed
l ift
Ġsouth west
ĠDex ter
ĠB od
Ġkey words
A verage
D IS
Ġethnic ity
! ),
ĠNational s
á ¹
ĠT ah
iox id
Ġwid get
Ġpast a
Ġbill ing
Ġtr ilogy
ĠL ines
Ġsn iff
Ġnep hew
L ate
Ġprinc ip
ĠLo op
ĠMarx ist
Ġdiss olved
Ġcontext s
ĠAm ount
ĠSp ike
Ġtot als
Ġorgan izer
Ġup rising
s hips
Y Y
ĠNort heast
m oney
grad ation
Ġgoal keeper
ĠH ear
Ġste ak
ĠBuzz Feed
Ġsole mn
ĠSc and
Ġpo pping
Ġad here
ĠAl leg
by te
ĠW olver
Ġun in
Ġrec ol
it ud
Ġmim ic
ib us
Ġpredict s
ĠKee per
i ating
Ġde ception
Ġlear nt
Ġdi ary
Ġcond itional
Ġre lic
Ġinv oke
ien ced
å Ī
ĠP ont
Ġcell phone
Ġspeed ing
Ġtack ling
Ġn ude
op ened
ĠMan afort
Ġ19 52
Ġmaj ors
ĠSil ence
Ġlog istics
Ġweight ed
ĠPsych iat
": ["
Ġsick ness
Ġdivid ends
z on
Re lease
ĠKe ys
ĠI ch
Ġen z
ĠF ernand
ĠÎ ±
Ġmean ings
Ġp enny
Ġst ern
Ġl ar
ĠPub lished
Ġback drop
K im
ĠSy nt
Ġdeb uted
w m
ĠIs le
Ġregul ating
ott i
ĠSch olars
ices ter
ĠChe f
Ġpop s
ĠLaun cher
ĠVar ious
Ġcomment ing
os lav
enz ie
Ġrival ry
â Ĥ¬
Re ally
Ġor c
Ġbe an
ĠJud y
Not ice
ĠB ike
? ]
Ġrent ed
st en
Ġfore front
ĠBald win
Ġyield ed
t ails
Pr ime
ĠS ources
ic ator
Se an
Ġmarch ing
Out put
ĠJ ungle
Ġres ide
zz le
ĠAndrew s
Ġtor que
Bas ic
Act ually
st rap
p enter
Ġexam s
ĠY a
Ġ15 9
ĠDec ision
Ġr ansom
ete enth
ens ing
2 13
Ġsun set
40 4
ĠRap id
ĠHe in
ĠAb original
Ġorgan ism
ĠS ever
Ġcl a
aj i
Sim ple
ĠFl avor
ĠE val
pr us
Ġch orus
D AY
Ġden ounced
Ġbi ography
ĠTurn bull
Rec ent
N ormal
lect ions
W ord
Ġf erry
ĠWag ner
h om
Un it
Ġsuper market
ĠS ith
Ġnomine es
Ġdictators hip
idd ler
Ġannoun ces
ĠThe m
ĠNept une
Ġde ity
ĠY i
Ġmon arch
AR R
Ġinv aded
ĠH ok
unt ary
C ertain
eg a
Ġk idding
ĠReg ulation
Ġtr ay
Ġphotograp hers
ĠArc ane
Ġdis charged
Ġevangel ical
Ġinter change
Ġfilm maker
ĠEnd less
Ġ29 0
ĠSalv ador
AS Y
ĠSign al
Ġwr ath
â ľ
l ot
' /
Ġproject ile
Ġemploy ing
ĠInter face
19 1
atell ite
ĠR ath
pack age
Ġindic ations
J ason
Ġarg s
ĠG Hz
Ġt ilt
n ants
w on
ãĤ µ
red d
res cent
ĠCal endar
Ġmod ular
Ġassist ing
Ġred eem
ĠBe an
Ġwor sh
Ġdecentral ized
) ...
37 7
Ġarr ays
Ġaccomplish ments
Î ¿
d ot
Ġmut ually
Ġob struct
Ġmis represent
ore st
ion ic
ru ce
% ;
Ġknow ingly
port ing
in ently
A ri
ĠSch ultz
D a
ĠC ere
Ġob solete
ħ ĭ
g ive
Ġb ait
Ġen larg
Ne ill
Ġ19 33
Ġrecons ider
ĠSerge ant
ĠDian e
ĠC ogn
ĠI con
P osition
Ġf ost
Ġstir ring
se ven
ĠSpace X
ugg ets
Ġmed d
G al
ĠS ister
B oy
Ġtrigger ing
T aking
Ġscream s
Ġca usal
Ġaw aken
Ar m
29 7
Ġdisp atched
ĠF ALSE
Ġorgan izational
ĠT ong
Ġdile mma
d emon
S pl
Ġhook s
ud ing
Ġvalid ate
Ġpot ion
Ġcl aw
Ġburg l
Ġqu ir
AC A
ĠBren nan
Ġdur ability
Ġbomb ings
ĠWind ow
Ġculp rit
3 25
There fore
umb ered
per formance
w arts
Ġen forcing
ĠBl ow
Ġre print
if ax
al pha
Ġsin ister
Ġbur ger
fight ing
Sc ore
ĠSt ones
i em
40 5
che my
Ġvine gar
n om
Ġprev ailing
ĠLat est
Â ¶
Ġb a
ĠWrit er
Ġ17 7
ĠCon way
Ġcollect s
Ġquant itative
Ġhor rors
og ens
ĠSl ov
Ġl ays
h aw
ĠSl ash
Ġnight club
ĠDav ies
Ġbr ide
ĠScar let
y mm
ĠApplic ations
vel ength
Ġrev ival
Ġsoft ly
Ġz oo
ita ire
C ur
Ġelect rom
Ġplant ing
OT O
ĠE lements
Ġsw allow
por ter
Ġlapt ops
Ġpe anut
Ġlobby ists
Î ²
Pan el
ĠJo an
im il
t nc
Ġresist ed
Ġout we
Ġret aining
at ri
Ġpo orer
ĠSyri ans
ĠHam mond
Ġwe ld
ud er
top ic
ĠT T
ric ia
Ġth ieves
L ic
ĠG ust
ĠW ays
are th
24 3
Ġbroad caster
sh ield
ass ium
ub le
Ġairst rikes
on so
Ġped al
Ġcollect ors
ĠV ander
ĠMes a
Ġdict ator
Ġd ir
ent on
c art
sc ore
ad der
C ry
Ġs sh
gg er
Ġdrunk en
ĠG S
ĠSe at
Ġcorner back
Ġsk ipped
ĠRes earchers
ĠAud i
Ref erence
Ġhaun ted
Ã «
ĠClin ic
c z
Ġp s
ĠPal adin
ĠRec ipe
Ġst igma
opp y
Ġmon keys
ĠHaw k
S ad
" />
ĠWorks hop
ĠRet ail
ĠAv atar
6 25
N a
ĠV C
ĠSec ure
M Y
19 88
oss ip
Ġpro state
Ġund en
Ġg amer
ĠCont ents
ĠWar hammer
ĠSent inel
3 10
Ġse gregation
ĠF lex
ĠM AY
Ġdr ills
ĠDrug s
Islam ic
Ġsp ur
Ġca fe
Ġimag inary
Ġgu iding
Ġsw ings
ĠThe me
ob y
Ġn ud
Ġbe gging
Ġstr ongh
Ġreject ing
Ġpedest rians
ĠPro spect
R are
s le
Ġconcess ions
ĠConst itutional
Ġbe ams
Ġfib ers
p oon
Ġinstinct s
pro perty
ĠB IG
Sand ers
im ates
Ġco ating
Ġcorps es
ĠTR UE
check ed
Ġ16 6
A sh
ĠJ S
ĠF iction
Ġcommun al
Ġener getic
oooo oooo
Ġnow adays
IL D
ib o
ĠSU V
R en
Ġdwell ing
Sil ver
Ġt ally
ĠM oving
Ġcow ard
Ġgener als
Ġhorn s
Ġcirc ulated
Ġrob bed
ĠUn limited
Ġharass ed
Ġinhib it
Ġcomp oser
ĠSpot ify
Ġspread s
3 64
Ġsu icidal
Ġno ises
ĠSt ur
Ġs aga
ĠK ag
is o
Ġtheoret ically
M oney
Ġsimilar ity
Ġslic ed
ut ils
ing es
" -
Ġan th
Ġimp ed
Mod ule
Through out
Ġmen us
comm ittee
and i
ob j
in av
f ired
ĠAb dullah
Ġund ead
Ġfont s
H old
EN G
Ġsustain ability
Ġfl ick
Ġr azor
ĠF est
ĠChar acters
Ġword ing
Ġpopul ist
Ġcritic izing
Ġm use
v ine
Ġcard board
Ġkind ly
Ġfr inge
ĠThe ft
icult ural
Ġgovern ors
Ġ ï¿½ï¿½ï¿½ï¿½
Ġ16 3
Ġtime out
ĠA uth
Child ren
A U
Ġred emption
ĠAl ger
Ġ19 14
Ġw aved
Ġastron auts
og rams
Ġsw amp
ĠFinn ish
Ġcand le
Ġton nes
ut m
Ġr ay
Ġsp un
Ġfear ful
art icles
Ġca us
or ically
ĠRequ ires
ĠG ol
Ġpop e
Ġinaug ural
Ġg le
AD A
ĠIS IL
ĠOff ensive
Ġwatch dog
Ġbal con
ent ity
ĠH oo
Ġgall on
AC C
Ġdoub ling
Ġimpl ication
ĠS ight
Ġdoct r
---- ---
Ġ\ \
Ġm alt
R oll
Ġâī ¥
Ġrec ap
add ing
u ces
ĠB end
fig ure
Ġtur key
Ġsoc ietal
ĠT ickets
Ġcommer cially
Ġsp icy
Ġ2 16
ĠR amp
Ġsuperior ity
Ã ¯
ĠTr acker
C arl
ĠC oy
ĠPatri ot
Ġconsult ed
Ġlist ings
Ġsle w
reens hot
ĠG one
Ġ[ ...]
30 9
Ġh ottest
Ø ±
Ġrock y
ĠD iaz
Ġmass age
Ġpar aly
Ġp ony
A z
Ġcart ridge
ĠN Z
Ġsn ack
ĠLam ar
ple ment
ĠLes lie
Ġm ater
Ġsn ipp
24 6
Ġjoint ly
ĠBris bane
ĠiP od
Ġpump ing
Ġgo at
ĠSh aron
eal ing
Ġcor on
Ġan omal
rah im
ĠConnect ion
Ġsculpt ure
Ġsched uling
ĠD addy
at hing
Ġeyeb rows
Ġcur ved
Ġsent iments
Ġdraft ing
D rop
( [
Ġnom inal
ĠLeaders hip
ĠG row
Ġ17 6
Ġconstruct ive
iv ation
Ġcorrupt ed
ger ald
ĠC ros
ĠChe ster
ĠL ap
ãģ ª
OT H
D ATA
Ġal mond
pro bably
I mp
Ġfe ast
ĠWar craft
F lor
Ġcheck point
Ġtrans cription
Ġ20 4
Ġtwe aks
Ġrel ieve
S cience
Ġperform er
Z one
Ġtur moil
ig ated
hib it
ĠC afe
the med
Ġflu or
ben ch
Ġde com
ĠU nt
ĠBar rett
ĠF acts
Ġt asting
ĠPTS D
ĠSe al
ĠJuda ism
ĠDynam ic
ĠC ors
V e
ĠM ing
ĠTrans form
v on
ĠDef enders
ĠTact ical
ĠV on
ĠUn ivers
Ġdist orted
ĠB reath
?' "
Ġag on
ĠDead ly
Ġl an
ĠCy cle
orn ed
Ġrel iably
Ġgl or
ĠMon key
ãĥ ¡
Ġad ren
Ġmicrow ave
ĠAl ban
irc raft
dig it
sm art
ĠD read
Â¯Â¯Â¯Â¯Â¯Â¯Â¯Â¯ Â¯Â¯Â¯Â¯Â¯Â¯Â¯Â¯
{ {
ĠRoc hester
Ġsimpl ified
Ġinf licted
Ġtake over
Ġyour selves
ad itional
Ġmus cular
K S
Ġing en
T ax
ĠFe ature
27 7
Ġcru c
Ġcr ate
Ġun identified
Ġacclaim ed
ĠM anga
ĠFr ances
ĠNep al
ĠG erald
ĠKu wait
Ġsl ain
ĠHe b
ĠG oku
ãģ® æ
28 6
M rs
ĠC ody
ĠSan ctuary
01 6
Ġdism ant
Ġdatas et
ĠH ond
b uck
ĠPat terson
Ġpal ette
ĠG D
ic ol
ĠL odge
Ġplanet ary
ak in
ĠRegist ered
ab we
ĠPeters burg
Ġha iled
ĠP iece
S che
ĠDO J
Ġen umer
18 1
ĠObs erver
ĠB old
f ounded
com merce
Ġexplo its
ĠF inding
UR N
ĠS ne
ĠAc id
ay ette
ĠVal ues
Ġdr astic
Ġarchitect ural
Ġ" .
× ķ
ump ed
Ġwra pping
Ġwid ow
ĠSl ayer
l ace
on ce
German y
av oid
Ġtem ples
P AR
Ã ´
ĠLuc ifer
ĠFl ickr
l ov
for ces
Ġsc outing
Ġlou der
tes y
Ġbefore hand
Ä ĵ
ĠNe on
ĠW ol
ĠTyp ically
ĠPolit ico
-+ -+
Ġbuild er
Ġder ive
K ill
Ġp oker
Ġambig uous
Ġlif ts
Ġcy t
Ġrib s
ood le
ĠS ounds
h air
ĠSynd rome
t f
Ġproport ional
u id
Ġper taining
ĠKind le
ĠNeg ro
Ġreiter ated
ĠTon ight
oth s
ĠCorn ell
Ġo wing
Ġ20 8
elf are
oc ating
ĠB irds
Sub scribe
Ġess ays
Ġburd ens
Ġillust rations
ar ious
ER AL
ĠCal cul
Ġx en
ĠLink edIn
ĠJ ung
Ġredes ign
Con nor
29 6
Ġrevers al
ĠAd elaide
ĠL L
Ġs inking
Ġg um
US H
c apt
ĠGr imm
Ġfoot steps
ĠCB D
isp ers
Ġpro se
Wed nesday
ĠM ovies
ed in
Ġoverturn ed
Ġcontent ious
US B
~~~~~~~~ ~~~~~~~~
ĠCo pper
Ġpoint less
N V
val ues
olph in
d ain
Ġdepos ited
ĠG W
Ġpreced ed
ĠCl a
ĠGo lem
ĠN im
ĠÎ ²
ĠEngine ers
m iddle
Ġfl att
oper ative
Ġcouncil s
imb abwe
el in
Ġstress ful
ĠL D
Ġres h
l ake
Ġwheel chair
ĠAltern ative
Ġoptim ize
oper ation
Ġpe ek
Ġones elf
ig il
Ġtrans itions
op athy
bl ank
Ġ16 9
17 1
________________________________ ________________________________
Ġl aundering
En c
ĠD EC
Ġwork outs
Ġsp ikes
Ġdin osaurs
Ġdiscrim inatory
P ool
R ather
38 5
R NA
tes ters
et o
ĠIdent ity
Ġve in
ĠBur ton
Ġarc ade
4 20
Ult imately
ĠSad ly
Ã °
p ill
Ġcub ic
ĠSpect rum
the se
st ates
Ġun official
h awks
ĠEVER Y
Ġrain bow
Ġincarcer ation
and ing
Ġsy ll
ĠEver ton
Ġ17 9
ĠSer bia
Ġ18 9
m eter
ĠMic key
Ġant iqu
Ġfact ual
ne ck
ĠN are
n orm
m ust
Ġhigh ways
Ġgl am
Ġdivid ing
ĠSquad ron
ĠMar tha
Ġbirth s
C over
//////// ////////
ĠW ong
Ph ot
ĠA LS
ri o
ĠNon etheless
ĠL emon
Ġ20 6
ĠE E
Ġderiv ative
ĠWW II
v ote
Ġthere in
Ġsepar ating
44 6
sy nc
ĠStre ets
Ġr att
Ġmunicip ality
ĠShort ly
Ġmon k
) ,"
Ġscr ub
Ġoper atives
Ne ither
Pl ace
ĠLim it
F emale
ĠAct or
Char acter
Ġconstit uted
35 7
Ġprotest ed
ĠSt raw
ĠHe ight
ild a
ĠTy ph
Ġflood s
Ġcos metic
W AY
pert ure
up on
t ons
ess ing
ĠP ocket
Ġro oft
ĠC aucas
Ġant idepress
Ġincomp atible
EC D
Ġoper a
ĠCont est
Ġgener ators
l ime
Def ense
19 87
for um
Ġsav age
ĠHung arian
n z
Ġmet allic
Ġex pelled
Ġres idency
Ġdress es
66 6
ĠC lement
f ires
C ategory
Ġge ek
al is
Ġc emetery
educ ated
Ġc rawl
ĠUn able
ĠT yson
ak is
Ġp ardon
ĠW ra
Ġstrengthen ed
ĠF ors
33 5
ĠH C
ĠM ond
Ġvisual s
ĠBeat les
ett lement
Ġ ï
g ro
Ġb ash
Ġpo orest
Ġex cel
Ġaspir ations
ĠM unicip
ens ible
Ġceremon ies
Ġintimid ation
ĠCON TR
be ck
ĠK ap
as u
Ġtradem arks
ĠS ew
ĠComp etition
net work
ĠAr ri
ĠT et
Ro aming
W C
D at
Ġso b
Ġpair ing
Ġoverd ose
SA Y
ab er
Ġrev olt
ĠF ah
act ing
e q
est ation
F ight
ĠMar ks
27 3
Ġ17 8
R aw
ãģ ĭ
34 9
bl ocks
Ġver ge
est ine
ĠPod esta
Ġinv asive
Ġprofound ly
ĠA o
e ach
Ġl est
inter pret
Ġshr inking
Ġerr one
Ġche es
ly s
ĠI vy
ĠDirect ory
Ġhint ed
V ICE
Ġcontact ing
ĠG ent
he i
Ġlabel ing
Ġmerc ury
ĠL ite
Ġexp ires
Ġdest abil
rit is
c u
Ġfeather s
Ġste er
Ġprogram med
ĠV ader
Go ing
ĠE lim
Ġy o
ĠMic he
Ġ20 3
Ġslee ves
Ġb ully
ĠHum ans
36 8
Ġcomp ress
ĠBan ner
AR S
Ġa while
Ġcal ib
Ġspons orship
ĠDiff iculty
ĠP apers
Ġident ifier
} .
Ġy og
ĠSh ia
Ġclean up
Ġvib e
int rodu
im ming
Austral ia
Ġout lines
ĠY outube
tr ain
ĠM akes
Ġde ported
Ġcent r
ĠD ug
ĠB oulder
ĠBuff y
Ġinj unction
ĠHar ley
ĠG roups
ĠD umbledore
ĠCl ara
Ġ" -
Ġsacrific ed
ep h
Sh adow
ib ling
Ġfreel ance
Ġevident ly
ph al
Ġret ains
M ir
Ġfin ite
d ar
ĠC ous
Ġrep aired
Ġperiod ic
Ġchampions hips
Ġaster oid
bl ind
Ġexpress ly
ĠAst ros
Ġsc aled
Ġge ographical
ĠRap ids
En joy
Ġel astic
ĠMoh amed
Mark et
be gin
Ġdisco vers
Ġtele communications
Ġscan ner
Ġen large
Ġsh arks
Ġpsy chedel
ĠRou ge
Ġsnap shot
is ine
X P
Ġpestic ides
ĠL SD
ĠDist ribution
re ally
Ġde gradation
Ġdisgu ise
Ġbi om
ĠEX T
Ġequ ations
Ġhaz ards
ĠComp ared
) *
Ġvirt ues
Ġeld ers
Ġenh ancing
ĠAc ross
er os
ang ling
Ġcomb ust
ucc i
Ġconc ussion
Ġcontrace ption
ĠK ang
Ġexpress es
Ġa ux
ĠP ione
Ġexhib its
Deb ug
OT AL
ĠAl ready
ĠWheel er
Ġexp ands
? :
Ġreconc iliation
Ġpir ates
Ġpur se
Ġdiscour age
Ġspect acle
R ank
Ġwra ps
ĠTh ought
Ġimp ending
O pp
ĠAng lo
ĠE UR
Ġscrew ed
ret ched
Ġencour agement
mod els
Ġconf use
mm m
ĠVit amin
âĸĳ âĸĳ
C ru
Ġkn ights
Ġdisc ard
Ġb ishops
ĠW ear
ĠGar rett
k an
ãĥ Ł
Ġmascul ine
cap ital
ĠA us
Ġfat ally
th anks
ĠA U
ĠG ut
12 00
Ġ 00000000
Ġsur rog
ĠBI OS
ra its
ĠWat ts
Ġresur rection
ĠElect oral
ĠT ips
4 000
Ġnut rient
Ġdepict ing
Ġspr ink
Ġm uff
ĠL IM
ĠS ample
ps c
ib i
gener ated
Ġspec imens
Ġdiss atisf
Ġtail ored
Ġhold ings
ĠMonth ly
ĠE at
po ons
Ġne c
ĠC age
ĠLot us
ĠLan tern
Ġfront ier
Ġp ensions
Ġj oked
ĠHard y
=-=- =-=-
r ade
U ID
Ġr ails
Ġem it
Ġsl ate
Ġsm ug
Ġsp it
ĠCall s
ĠJac obs
f eat
ĠU E
Ġrest ruct
Ġregener ation
Ġenerg ies
ĠCon nor
OH N
ĠChe ese
Ġg er
Ġresur rect
man agement
N W
Ġpres ently
ĠBru ins
M ember
ĠM ang
id an
Ġboost ing
w yn
+ .
requ isite
ĠNY PD
ĠMe gan
ĠCond itions
Ġp ics
nes ium
ĠR ash
Ġ17 4
ĠD ucks
Ġemb ro
z u
on ian
rel igious
Ġc raz
ĠAC A
ĠZ ucker
EM A
ĠPro s
We apon
ĠKn ox
ĠAr duino
Ġst ove
Ġheaven s
ĠP urchase
Ġher d
Ġfundra iser
Dig ital
5 000
Ġprop onents
/ âĢĭ
Ġj elly
ĠVis a
Ġmon ks
Ġadvance ment
ĠW er
Ġ18 7
e us
ert ility
Ġfet al
Ġ19 36
L o
Ġout fits
Ġstair case
b omb
Ġcustom ized
cl air
T ree
Ġm apped
ĠConsider ing
ĠTor res
Ġmeth yl
Ġapprox imate
Ġdo om
ĠHans en
Ġc rossover
Ġstand alone
ä ¼
Ġinv ites
Ġgra veyard
Ġh p
Donald Trump
Ġesc ort
G ar
Ġpredec essors
Ġh ay
Ġen zyme
ĠStra ight
vis ors
I ng
ane ously
ĠApp lied
Ġf ec
ĠDur ant
Ġout spoken
or b
Ġz eal
Ġdisgr ace
' ).
ĠChe ng
28 9
ĠRen a
ĠSu icide
29 4
Ġout raged
ĠNew man
ĠN vidia
ĠA ber
ĠB ers
Ġrecre ation
Wind ow
ĠD P
x e
Ġped oph
Ġfall out
ambo o
Ġpresent ations
ĠApp s
Ġh tml
3 45
ĠX XX
Ġrub bing
ĠLe ather
Ġhum idity
se ys
est ablished
ĠUn its
64 6
Ġrespect able
A uto
Ġthri ving
ĠInn ovation
ang s
Ext ra
reg ulation
29 8
p ick
Ex amples
ĠC J
Att ack
Ġdr acon
L T
Ġstick er
re rs
Ġsun ny
I ss
reg ulated
d im
ĠAb stract
Ġhus bands
Off ice
om ination
it ars
AN GE
asc al
ĠK ris
ĠInf antry
Ġm alf
ĠA the
ĠR ally
bal anced
................ ........
OU P
Ġmole cule
met ics
ĠSpl it
ĠInstruct ions
ĠN ights
c ards
Ġt ug
Ġcon e
å Ń
Ġt x
ĠDisc ussion
Ġcatast rophe
pp e
g io
Ġcommun ism
Ġhal ted
ĠGu ant
cle an
ĠSc hed
ĠK anye
Ġw ander
ĠSer iously
Ġ18 8
enn ial
f ollow
product ive
ĠFl ow
ĠS ail
Ġc raw
Ġsim ulations
or u
ang les
ĠN olan
Ġmen stru
4 70
Ġ20 7
aj a
Ġcas ually
board ing
Ġ2 22
ov y
ĠN umbers
um at
O E
28 7
ĠCle mson
Ġcert s
Ġsl id
ĠT ribe
Ġto ast
Ġfort unes
Ġf als
ĠComm ittees
Ġg p
Ġf iery
ĠN ets
ĠAn ime
Pack age
ĠComp are
l aughter
in fect
Ġatroc ities
Ġjust ices
Ġins ults
ĠVern on
Ġsh aken
Ġperson a
est amp
36 7
br ain
Ġexperiment ing
K en
ĠElect ronics
Ġ16 1
dom ain
Ġgraph ical
b ishop
Ġwho pping
ĠEv angel
Ġadvertis ers
ĠSpe ar
Ġb ids
Ġdestro ys
ut z
Ġunders c
ĠAD D
Ġan ts
ĠC um
ipp les
ĠF ill
Ġgl anced
Ġind icted
ĠE ff
Ġmis con
ĠDes ktop
Ġab ide
ãĥ Ģ
ĠI o
ĠC oul
Ġcaps ule
ĠCh rys
M ON
Ġund es
ĠI RA
Ġc itation
Ġdict ate
ĠNet works
ĠConf lict
ĠSt uff
x a
is ec
ĠChem istry
Ġquarter ly
William s
an an
O pt
ĠAlexand ria
out heastern
ĠSpring field
ĠBlack s
Ġge ography
24 2
Ġut most
ĠEx xon
ab outs
E VA
ĠEn able
ĠBar r
Ġdisag reed
ĠCy prus
Ġdement ia
Ġlab s
Ġubiqu itous
ĠLO VE
Ġconsolid ated
s r
Ġcream y
ĠTim ber
Reg ardless
ĠCert ificate
Ġ" ...
ogen ous
Capt ain
Ġinsult ing
ĠSor os
ĠInst r
ĠBulgar ia
bet ter
Ġsuck ing
ĠDavid son
at z
Ġcoll ateral
g if
Ġplag ued
ĠC ancel
ĠGard ner
R B
Ġsix teen
Rem ove
ur istic
c ook
R od
Ġcompr ising
f le
) âĢĶ
ĠVik ing
g rowth
agon al
Ġsr f
af ety
m ot
N early
st own
ĠF actor
Ġautom obile
Ġproced ural
m ask
amp ires
Ġdisapp ears
j ab
3 15
Ġ19 51
ne eded
Ġd aring
le ader
Ġp odium
Ġun healthy
Ġm und
Ġpy ramid
oc re
Ġkiss ed
Ġdream ed
ĠFant astic
ĠG ly
å Ĭ
Ġgreat ness
Ġsp ices
Ġmet ropolitan
Ġcomp uls
i ets
101 6
ĠSh am
ĠP yr
fl ies
ĠMid night
Ġswall owed
Ġgen res
ĠL ucky
ĠRew ards
Ġdisp atch
ĠI PA
ĠApp ly
Ġa ven
al ities
3 12
th ings
Ġ( ).
Ġm ates
ĠS z
ĠC OP
ol ate
O FF
Ġre charge
c aps
ĠYork er
ic one
Ġgal axies
ile aks
D ave
ĠP uzz
ĠCelt ic
ĠA FC
27 6
ĠS ons
Ġaffirm ative
H or
Ġtutorial s
ĠC ITY
ĠR osa
ĠExt ension
Ser ies
Ġf ats
Ġr ab
l is
Ġun ic
Ġe ve
ĠSp in
Ġadul thood
ty p
Ġsect arian
Ġcheck out
ĠCy cl
S ingle
Ġmart yr
Ġch illing
88 8
ou fl
Ġ] ;
Ġcongest ion
m k
ĠWhere as
Ġ19 38
ur rencies
er ion
Ġbo ast
ĠPat ients
Ġch ap
ĠB D
real DonaldTrump
Ġexam ines
h ov
Ġstart ling
ĠBab ylon
w id
om ew
br ance
ĠOd yssey
w ig
Ġtor ch
ĠV ox
ĠMo z
ĠT roll
ĠAn s
Similar ly
ĠF ul
00 6
Un less
ĠAl one
st ead
ĠPub lisher
r ights
t u
ĠDoes n
Ġprofession ally
Ġcl o
ic z
Ġste als
Ġ á
19 86
Ġst urdy
ĠJoh ann
Ġmed als
Ġfil ings
ĠFr aser
d one
Ġmult inational
Ġf eder
Ġworth less
Ġp est
Yes terday
ank ind
Ġg ays
Ġb orne
ĠP OS
Pict ure
Ġpercent ages
25 1
r ame
Ġpot ions
AM D
ĠLeban ese
Ġr ang
ĠL SU
ong s
Ġpen insula
ĠCl ause
AL K
oh a
ĠMac Book
Ġunanim ous
Ġl enders
Ġhang s
Ġfranch ises
ore rs
ĠUp dates
Ġisol ate
and ro
S oon
Ġdisrupt ive
ĠSur ve
Ġst itches
ĠSc orp
ĠDomin ion
Ġsupp lying
Ar g
Ġtur ret
ĠL uk
Ġbr ackets
* )
ĠRevolution ary
ĠHon est
Ġnot icing
ĠSh annon
Ġafford ed
Ġth a
ĠJan et
! --
ĠNare ndra
ĠPl ot
H ol
se ver
e enth
Ġobst ruction
Ġ10 24
st aff
j as
or get
sc enes
l aughs
ĠF argo
cr ime
Ġorche str
Ġde let
ili ary
rie ved
Ġmilit ar
ĠGreen e
âĹ ı
ãģ ¦
ĠGu ards
Ġunle ashed
ĠWe ber
Ġadjust able
Ġcal iber
Ġmotiv ations
ĠÃ ł
m Ah
ĠL anka
hand le
Ġp ent
ĠR av
ĠAng ular
ĠK au
umb ing
Ġphil anthrop
Ġde hyd
Ġtox icity
e er
ĠY ORK
w itz
å ¼
ĠI E
commun ity
ĠA H
Ġret ali
Ġmass ively
ĠDani els
ĠD EL
Ġcar cin
Ur l
Ġrout ing
ĠNPC s
ĠR AF
ry ce
Ġwa ived
ĠGu atem
Every body
Ġco venant
Ġ17 3
Ġrelax ing
Ġqu art
al most
Ġguard ed
ĠSold iers
ĠPL AY
Ġout going
L AND
Ġre write
ĠM OV
ĠIm per
ĠS olution
Ġphenomen al
Ġl ongevity
Ġimp at
ĠN issan
ir ie
Ġod or
ĠZ ar
ok s
Ġmilit ias
ĠSP EC
Ġtoler ated
ars er
ĠBrad ford
+ ,
Ġsur real
s f
Can adian
Ġresemb lance
Ġcarbohyd rate
VI EW
Ġaccess ory
me al
larg est
ieg el
Some one
Ġtoug hest
os o
Ġfun nel
Ġcondemn ation
lu ent
Ġw ired
ĠSun set
Jes us
ĠP ST
ĠP ages
ĠTy coon
ĠP F
Ġselect ions
Ġ à¤
part isan
Ġhigh s
ĠR une
Ġcraft s
le ad
ĠParent s
Ġre claim
ek er
ĠAll ied
ae per
Ġlo oming
Ġbenefic iaries
ĠH ull
Stud ents
Jew ish
d j
Ġp act
tem plate
ĠOffic ials
ĠBay lor
Ġhe mp
Ġyouth s
ĠLevel s
ĠX iao
ĠC hes
Ġende avor
ĠRem oved
Ġhipp ocamp
H ell
ãĤ Ĭ
80 5
Ġd inosaur
ĠWr ath
ĠIndones ian
Ġcalcul ator
ĠD ictionary
Ġ4 20
ĠM AG
( _
! ,
t arians
Ġrestrict ing
rac use
Ġweek day
OU NT
Ġsh rugged
leg round
Ġb ald
ĠDo ctors
Ġt outed
ĠMax well
Ġ2 14
Ġdiplom at
Ġrep ression
Ġconstitu ency
v ice
r anked
ĠNap oleon
g ang
ĠFore ver
t un
Ġbul b
ĠPD T
ĠC isco
V EN
Ġres umed
Ste ven
ĠManit oba
Ġfab ulous
ĠAg ents
19 84
Ġam using
ĠMyster ies
Ġor thodox
fl oor
Ġquestion naire
Ġpenet rate
Ġfilm makers
ĠUn c
Ġst amped
Ġth irteen
Ġout field
Ġforward ed
Ġapp ra
Ġa ided
t ry
Ġunf ocused
ĠL iz
ĠWend y
ĠSc ene
Ch arg
Ġreject s
Ġleft ist
ĠProv idence
ĠBr id
reg n
Ġprophe cy
ĠL IVE
4 99
Ġfor ge
ĠF ML
Ġintrins ic
ĠF rog
Ġw ont
ĠH olt
Ġfam ed
CL US
aeper nick
ĠH ate
ĠC ay
Ġregister ing
ort ality
rop y
ocaly ptic
a an
n av
Ġfasc ist
IF IED
Ġimpl icated
ĠRes ort
ĠChand ler
ĠBr ick
P in
ys c
Us age
ĠHel m
us ra
âĺħ âĺħ
ĠAb bas
Ġunanim ously
Ġke eper
Ġadd icted
?? ?
Ġhelm ets
Ġant ioxid
aps ed
80 8
gi ene
Ġwa its
Ġmin ion
ra ved
ĠP orsche
Ġdream ing
Ġ17 1
ĠC ain
Ġun for
ass o
ĠConfig uration
k un
hard t
Ġn ested
ĠL DS
L ES
Ġt ying
en os
Ġc ue
ĠMar qu
sk irts
Ġclick ed
Ġexp iration
ĠAccording ly
ĠW C
Ġbless ings
Ġaddict ive
ĠN arr
y x
ĠJagu ars
Ġrent s
ĠS iber
Ġt ipped
ous se
ĠFitz gerald
Ġhier arch
out ine
Ġwa velength
> .
ch id
ĠProcess ing
/ +
r anking
E asy
ĠConst ruct
Ġt et
ins ured
H UD
Ġqu oting
Ġcommun icated
in x
Ġin mate
Ġerect ed
ĠAbs olutely
ĠSure ly
Ġun im
ĠThr one
he id
Ġcl aws
Ġsuper star
ĠL enn
ĠWh is
U k
ab ol
Ġsk et
ĠN iet
Ġper ks
Ġaff inity
Ġopen ings
phas is
Ġdiscrim inate
T ip
v c
Ġgr inding
ĠJenn y
Ġast hma
hol es
ĠHom er
Ġreg isters
ĠGl ad
Ġcre ations
Ġlith ium
Ġappl ause
unt il
Just ice
ĠTur ks
Ġsc andals
Ġb ake
t ank
M ech
ĠMe ans
ĠM aid
Republic ans
is al
wind ows
ĠSant os
Ġveget ation
33 8
t ri
Ġfl ux
ins ert
Ġclar ified
Ġmort g
ĠCh im
ĠT ort
Ġdiscl aim
met al
ĠAs ide
Ġindu ction
Ġinf l
Ġathe ists
amp h
Ġe ther
ĠV ital
ĠBu ilt
M ind
Ġweapon ry
S ET
Ġ18 6
ad min
g am
cont ract
af a
Ġderiv atives
Ġsn acks
Ġch urn
E conom
Ġca pped
ĠUnder standing
ĠH ers
ĠI z
Ġd uct
I ENT
augh ty
Ġâľ Ķ
ĠN P
Ġsa iling
In itialized
Ġt ed
Ġreact ors
ĠL omb
Ġcho ke
ĠW orm
Ġadm iration
Ġsw ung
ens ibly
Ġr ash
ĠGo als
ĠImport ant
Sh ot
ĠR as
Ġtrain ers
ĠB un
Work ing
Ġhar med
ĠPand ora
ĠL TE
Ġmush room
ĠCH AR
ĠF ee
ĠM oy
B orn
ol iberal
ĠMart ial
Ġgentle men
Ġling ering
Offic ial
Ġgra ffiti
ĠN ames
D er
Ġqu int
ist rate
aze era
ĠNOT ICE
ĠFlore nce
Ġpay able
Ġdep icts
ĠSpe cies
He art
âĶĢâĶĢâĶĢâĶĢ âĶĢâĶĢâĶĢâĶĢ
Ġencl osed
Incre ases
D aily
ĠL is
Ġenact ment
ĠB acon
ĠSt eele
dem and
Ġ18 3
Ġmouth s
Ġstr anded
Ġenhance ment
01 1
ĠWh ats
Ġhe aled
en y
ĠR ab
Ġ3 40
ĠLab yrinth
ro ach
ĠY osh
ĠCl ippers
Ġconcert s
Intern et
35 5
Ġstick ers
Ġter med
ĠAx e
Ġgrand parents
Fr ance
ĠCl im
ĠU h
ul ic
Ġthr ill
cent ric
ĠOver view
ĠCond uct
Ġsubstant ive
Ġ18 2
m ur
Ġstr ay
ĠCo ff
Ġrep etitive
ĠFor gotten
Ġqual ification
ew itness
ĠZ imbabwe
Ġsim ulated
ĠJ D
25 3
ĠW are
Ġun sc
T imes
Ġsum mons
Ġdis connected
Ġ18 4
ci us
ĠGu jar
od ka
Ġer ase
ĠTob acco
elect ed
Ġun cont
ĠShe pard
ĠL amp
Ġalert ed
Ġoper ative
arn a
u int
Ġneglig ence
ac ements
Ġsup ra
Ġprev ail
ĠSh ark
Ġbel ts
ãģ «
Ġt ighter
Engine ers
Ġin active
Ġexp onent
ĠWill ie
a ples
Ġhe ir
ĠH its
ian n
ĠS ays
Ġcurrent s
ĠBeng al
Ġar ist
B uffer
Ġbree ze
ĠWes ley
Col a
Ġpron oun
Ġde ed
ĠK ling
Ġof t
Ġinf lict
Ġpun ishing
Ġn m
ik u
OD UCT
01 4
Ġsubsid y
ĠDE A
ĠHer bert
ĠJ al
B ank
Ġdef erred
Ġship ment
B ott
Ġal le
b earing
HT ML
Off line
Ġ2 13
Ġscroll ing
Ġsc anned
ĠLib yan
ĠT OP
ch rom
d t
col umn
Psy NetMessage
Z ero
Ġtor so
0 50
âķ Ĳ
Ġimp erson
ĠSchw artz
ud ic
Ġpiss ed
ĠS app
25 7
ĠIS Ps
og l
Ġsuper vised
Ġad olescent
Ġatt ained
ĠDel ivery
ĠB unny
Ġ19 37
Ġmini ature
Ġo s
Ġ3 70
60 8
ĠMour inho
Ġinn ate
Ġtem po
ĠN M
ĠFall en
00 9
Ġprov ocative
Stream er
ĠBened ict
ĠBol she
Ġt urtle
ĠPC B
ĠEqu al
Direct or
ĠR end
Ġflu ids
Author ities
Ġcous ins
requ ency
ĠNeigh bor
s ets
sh ared
Char les
pass word
Ġg ears
Ġ2 11
ĠHard ware
ri ka
Ġup stream
H om
Ġdisproportion ately
iv ities
Ġund efined
Ġelect rons
Ġcommem or
Event ually
Ġ> <
Ġir responsible
2 18
ĠRe leased
ĠO VER
ĠI GN
ĠB read
st ellar
ĠS age
tt ed
dam age
ed ition
ĠPre c
Ġl ime
Ġconf inement
Ġcal orie
we apon
Ġdiff ering
ĠS ina
m ys
am d
Ġintric ate
k k
ĠP AT
Ã£ o
st ones
lin ks
Ġr anch
Sem itic
Ġdifferent iate
ĠS inger
occup ied
Ġfort ress
c md
Ġinter ception
ĠAnk ara
Ġre pt
ĠSol itaire
Ġrem ake
p red
Ġd ared
aut ions
ĠB ACK
Run ning
Ġdebug ging
Ġgraph s
3 99
ĠNig el
Ġb un
Ġpill ow
Ġprog ressed
fashion ed
Ġob edience
ER N
Ġrehe ars
C ell
t l
S her
Ġher ald
ĠPay ment
ĠC ory
ĠDe pt
Ġrep ent
ĠWe ak
uck land
Ġple asing
Ġshort ages
Ġjur ors
ĠK ab
q qa
Ant i
Ġw ow
ĠRC MP
Ġt sun
ĠS ic
Ġcomp rises
Ġsp ies
Ġprec inct
n u
Ġur ges
Ġtim ed
Ġstrip es
ĠB oots
Ġy en
Adv anced
Ġdisc rete
ĠArch angel
employ ment
D iff
Ġmon uments
Ġ20 9
work er
Ġ19 6
ĠI g
utter stock
T PS
J ac
Ġhomeless ness
Ġcomment ator
Ġrac ially
f ing
se ed
E le
ell ation
Ġeth anol
Ġpar ish
ĠD ong
ĠAw akening
Ġdev iation
ĠB earing
ĠTsu k
Ġrec ess
Ġl ymph
ĠCann abis
å ľ
ĠNEW S
Ġd ra
ĠStef an
ĠWr ong
ĠS AM
Ġloose ly
Ġinterpre ter
ĠPl ain
Go vernment
Ġbigot ry
Ġgren ades
ave z
pict ured
Ġmand ated
ĠMon k
ĠPed ro
Ġl ava
27 4
Ġcyn ical
ĠScroll s
l ocks
M p
Ġcon gregation
orn ings
ph il
ĠI bid
Ġf erv
Ġdisapp earing
Ġarrog ant
sy n
ĠMa ver
ĠSu it
24 1
Ġab bre
ack ers
P a
ĠY el
Whe never
Ġ23 5
ĠV ine
ĠAn at
Ġext inct
LE T
Ġexecut able
V ERS
ox ide
D NA
ĠP rel
Ġresent ment
Ġcompr ise
ĠAv iv
Ġinter ceptions
Ġprol ific
IN A
ĠEr in
though t
2 19
ĠPsychiat ry
un ky
chem ist
H o
ĠMcC oy
Ġbr icks
L os
ri ly
ĠUS SR
Ġr ud
Ġl aud
ĠW ise
ĠEmer ald
Ġrev ived
Ġdam ned
ĠRep air
id em
ct ica
Ġpatri arch
ĠN urs
me g
Ġcheap est
re ements
empt y
ĠCele br
Ġdepri vation
ch anted
ĠTh umbnails
E nergy
ĠEth an
ĠQ ing
Ġopp oses
W IND
v ik
ĠM au
ĠS UB
66 7
G RE
ĠVol unte
nt on
C ook
å Ĳ
es que
Ġplum met
Ġsu ing
Ġpron ounce
Ġresist ing
ĠF ishing
ĠTri als
Ġy ell
Ġ3 10
Ġin duct
Ġpersonal ized
oft en
R eb
EM BER
Ġview point
Ġexist ential
() )
rem ove
MENT S
l asses
Ġev apor
Ġa isle
met a
Ġreflect ive
Ġentit lement
Ġdev ised
mus ic
asc ade
Ġwind ing
off set
Ġaccess ibility
ke red
Bet ter
ĠJohn ston
th inking
S now
ĠCroat ia
ĠAt omic
27 1
34 8
Ġtext book
ĠSix th
Ġ Ø§ÙĦ
Ġsl ider
ĠBur ger
b ol
S ync
Ġgrand children
Ġc erv
+ )
Ġe ternity
Ġtweet ing
Ġspec ulative
Ġpiv otal
ĠW P
ĠT ER
ynam ic
Ġu pl
ĠC ats
per haps
Ġclass mates
Ġblat ant
' -
Ġl akh
ant ine
ĠB org
i om
/ (
ĠAthlet ic
Ġs ar
OT A
ĠHoff man
Never theless
Ġad orable
Ġspawn ed
Ass ociated
ĠDom estic
Ġimpl ant
ĠLux em
ĠK ens
Ġp umps
ĠS AT
Att ributes
50 9
av our
Ġcentral ized
ĠT N
Ġfresh ly
ĠA chieve
Ġouts iders
her ty
ĠRe e
ĠT owers
ĠD art
ak able
Ġm p
ĠHeaven ly
Ġr ipe
ĠCarol ine
ry an
Ġclass ics
Ġret iring
Ġ2 28
Ġa h
Ġdeal ings
Ġpunch ing
ĠChap man
O ptions
max well
vol ume
Ġst al
Ġex ported
ĠQu ite
Ġnumer ical
B urn
F act
ĠKey stone
Ġtrend ing
Ġalter ing
ĠAfric ans
47 8
ĠM N
ĠKn ock
Ġtempt ation
Ġprest ige
Over view
ĠTrad itional
ĠBah rain
Priv ate
ĠH OU
Ġbar r
ĠT at
C ube
US D
ĠGrand e
ĠG at
ĠFl o
Ġres ides
Ġind ec
vol ent
Ġperpet ual
ub es
Ġworld view
ĠQuant um
Ġfil tered
Ġen su
orget own
ERS ON
ĠM ild
37 9
OT T
Ã ¥
Ġvit amins
Ġrib bon
Ġsincere ly
ĠH in
Ġeight een
Ġcontradict ory
Ġgl aring
Ġexpect ancy
Ġcons pir
Ġmon strous
Ġ3 80
re ci
Ġhand ic
Ġpump ed
Ġindic ative
Ġr app
Ġav ail
ĠLEG O
ĠMar ijuana
19 85
ert on
Ġtwent ieth
################ ################
ĠSw amp
Ġval uation
Ġaffili ates
adjust ed
ĠFac ility
26 2
Ġenz ymes
itud inal
Ġimp rint
S ite
Ġinstall er
ĠT RA
m ology
lin ear
ĠCollect ive
ig ating
ĠT oken
Ġspec ulated
K N
ĠC ly
or ity
Ġdef er
Ġinspect ors
appro ved
R M
ĠSun s
Ġinform ing
ĠSy racuse
ib li
7 65
Ġgl ove
Ġauthor ize
âĢ¦âĢ¦âĢ¦âĢ¦ âĢ¦âĢ¦âĢ¦âĢ¦
ĠCru ise
Ġcontract ing
she ll
IF E
ĠJew el
p ract
ĠPhot oshop
ĠKnow ing
h arm
Ġattract ions
ad an
et us
01 8
w agen
Al t
Ġmultip ly
Ġequ ilibrium
: {
ĠF ighters
ĠEd gar
Ġfour teen
Go vern
Ġmis use
Ġab using
Ġancest ry
ram er
64 4
Ġwor ms
Ġthick er
ĠComb ine
Ġpeas ants
Ġv ind
Ġcon quest
Ġm ocked
Ġc innamon
ĠC ald
ĠGall up
Ġavoid ance
Ġincarn ation
ĠStr at
Ġt asted
ent a
ĠN eal
p ared
Ġtermin ology
ject ion
Scient ists
ĠIN S
ĠDe e
Ġdirect ories
R oad
ĠSh ap
br ight
ĠDirect ors
ĠCol umn
Ġb ob
Ġprefer ably
Ġgl itch
f urt
Ġe g
id is
C BC
Ġsur rendered
Ġtest ament
33 6
ug gest
ĠN il
an other
Ġpat hetic
ĠDon na
Ġ2 18
ĠA very
Ġwhis key
Ġf ixture
ĠCon quest
Ġbet s
O cc
ĠLe icester
] ."
Ġ) );
Ġfl ashes
45 6
Ġmask ed
ge bra
Ġcomput ed
che l
aud er
Ġdefe ats
ĠLiber ation
ĠOs ama
ĠV ive
Ch anges
Ch annel
Ġtar iffs
Ġm age
ĠS ax
Ġinadvert ently
ĠC RE
ĠRe aper
ink y
gr ading
Ġstere otyp
Ġcur l
ĠF ANT
Ġfram eworks
M om
ĠAn ch
Ġflav our
car bon
Ġperm itting
let cher
ĠMo zilla
ĠPark ing
ĠCh amp
Sc roll
Ġmurd erer
Ġrest ed
Ġow es
ĠP oss
AD D
IF F
res olution
ĠMin ing
Ġcompar ative
D im
Ġneighbour ing
ĠA ST
ĠT oxic
Ġbi ases
Ġgun fire
ur ous
ĠMom ent
19 83
Ġper vasive
tt p
ĠNorm ally
r ir
S arah
ĠAlb any
Ġun sett
ĠS MS
ip ers
l ayer
ĠWh ites
up le
Ġtur bo
ĠLe eds
Ġthat s
ĠMin er
M ER
ĠRe ign
Ġper me
ĠBl itz
Ġ19 34
Ġintimid ating
t ube
Ġecc entric
ab olic
box es
ĠAssoci ates
v otes
Ġsim ulate
um bo
aster y
Ġship ments
FF FF
an th
Ġseason ed
Ġexperiment ation
âĸ ł
law s
Me et
idd les
ant ics
R ating
IS IS
h ift
Ġfront s
b uf
01 7
Ġun att
ĠD il
le ases
ĠGard ens
77 7
t ouch
ve ll
45 8
Ġ= ====
s aving
Ġer osion
ĠQu in
Ġearn s
Ġaccomplish ment
ĠWe i
Ġ< [
____ _
Ġir rig
ĠT eddy
Ġconqu ered
ĠArm ored
Ġassert s
Ġmanip ulating
r Ã©
Ġtranscript s
G allery
Ġplot ting
Ne il
Ġbetray al
load er
ĠS ul
Ġdispl acement
Ġroy alty
ĠW I
he it
ĠDev ices
alle l
Ġmunicipal ities
Ġcan al
St ars
ĠU AE
Ġ" âĢ¦
ĠC U
ab ove
Ġreson ance
ĠguiActive Un
add ed
ĠBra ves
ĠI bn
Ġhere by
ĠB RE
Ġshare holder
ĠH ir
ĠJ i
Ġstrange ly
Ġadm ired
Ġpl ight
Ġb achelor
ĠP ole
cipl inary
T ony
ĠArmen ian
Ġun man
ĠZion ist
St age
isco ver
Ġautom otive
Ġs idelines
Ġsl ick
ĠRena issance
ĠF UN
Im ages
ĠH aj
Ġp ing
Ġshort cut
ĠBl vd
ĠLook s
Ġbur sts
Ġcl amp
Ġm ish
Ġsort ing
Ġpatri ot
Ġcorrect ness
ĠScand inav
ĠCaval iers
p ython
az ar
Ġ3 75
ĠJa une
40 9
Ġdetrim ental
Ġstab bing
Ġpoison ed
Ġf ountain
oc ent
or st
ĠMar i
Ġr ains
ĠO vers
ĠInst itution
ud get
AM Y
t ale
ĠK R
ĠPr ices
Ġhead aches
Ġlands l
ĠA ura
Bon us
ĠZ hao
ĠH ip
Ġhop s
ĠKurd istan
Ġexplo iting
ry n
Ġhypocr isy
op ening
Ġgun shot
Ġw ed
inter stitial
Inter stitial
Ġam en
Bre aking
Ġmarket ed
W ire
ĠC rowd
Contin ue
ĠK nown
ĠEffect ive
ore an
iz ons
Jose ph
Ġescal ation
us ername
Ġcur tain
AT ES
ĠP AR
ĠM iy
Ġcounter fe
l ene
Ġcont enders
d aily
ĠAs c
ĠPhill ip
most ly
Ġfil ename
he ne
Ġresemb ling
Ġst aging
ĠCh loe
Ġw iring
H on
ĠRen ew
ott age
ĠHy brid
m uch
Ġstro kes
Ġpolicy makers
AP TER
ĠArk ham
pl ot
Ġassist ants
Ġde port
ĠSe ga
Ġinflu enza
ĠC ursed
ĠK obe
Ġskin ny
Prov ider
ĠR ip
Ġincrement al
product s
B F
Ġd ome
ĠC redits
Ġlos ers
int s
ĠBet ty
ĠTal ent
ĠD AM
L v
E ss
Ġd ens
tem p
J udge
od ic
Ġ' (
UR ES
ets k
V O
Ġretrie ved
Ġarchitect s
Ù ĩ
Ġeth ic
ĠSecond ary
st ocks
ad ia
Ġ3 25
ĠOp inion
Ġsimultane ous
Ġd izz
ul p
Ġsmugg ling
ipp ery
R andom
f acing
ĠD as
Ġstock p
Ġdiscl osures
po inter
Ġcor al
ĠSe lection
ĠP ike
ival ent
Ġruth less
ĠR im
Ġensu ing
ĠExper iment
Ġcongress man
Ġbelie ver
Ġun specified
ĠM ord
Ġknowledge able
ĠV ERY
T X
Ġstra ps
Ġtur f
apesh ifter
Ġmar ital
Ġfl ock
ãģ Ĩ
26 3
AM ES
ĠOpp osition
Ġtre asures
ĠG OD
Ġmodel ed
ĠWOR LD
Ġ( [
ĠUs age
H F
Ġ$ (
uss ed
Ġpione er
E ight
par se
b read
rit z
ĠMir anda
ĠK ant
++ )
ore n
Ġprov oked
Ġbre eds
ĠIn cludes
ĠPast ebin
ĠFl ip
J ava
Ġbr ink
Ġrum ored
Ġun seen
Ġgar nered
ĠDef in
al ted
Ġtatt oos
Ġhes itation
is itions
ĠWe aver
ĠReport ing
Ġtherap ies
Ġconsult ants
Ġresid ual
ĠMal i
ĠRom a
i ago
ĠRes idents
ub i
Ġremed ies
Ġadapt ive
ĠAl ive
ĠBar cl
Ġwal lets
c rypt
etermin ation
ĠPel osi
Ġsl ipping
oton in
Ġall iances
pat rick
ir is
Ġor th
ĠPer kins
ĠDe V
ĠG ets
Ġdry ing
ge e
fore st
ĠFor get
ore m
33 9
Ġvague ly
ĠD ion
ĠP orn
ĠH OW
Ġp neum
Ġrub ble
ĠT aste
enc ia
ĠG el
Ġd st
Ġ24 5
ĠMoroc co
inf lamm
ĠTw ins
Ġb ots
d aughter
ĠB alk
Ġbre thren
Ġlog os
Ġgo bl
f ps
Ġsub division
Ġp awn
Ġsquee zed
Ġmor ale
ĠD W
' "
Ġkn ot
ook y
Ġdiv isive
Ġboost ed
ch y
ãĥ Ĳ
if act
Ġnewcom ers
ĠWrest ling
Ġsc outs
w olves
R at
Ġnin eteenth
ĠOs borne
St ats
Ġem powered
Ġpsych opath
ĠO EM
ugg age
ĠP K
ĠMoh ammad
P ak
Ġanarch ists
ĠExt ract
est hes
ĠStock holm
l oo
ĠG raph
Ġdeploy ing
ĠStr anger
ĠM old
Ġstaff er
Ġdiscount ed
uck le
ple ase
ĠLand ing
ÃŃ a
Ġ19 3
Ġan te
Ġrep etition
Ġ+ /-
Ġpar ody
Ġlive ly
AA A
ĠHor us
Ġp its
ind ers
L OC
ĠVen ice
40 6
ĠDis cover
â Ĩ
ellect ual
Ġp ens
Ġey el
ig uous
Im pl
Ġj oking
Ġinv al
ĠBel fast
Ġcredit ors
ĠSky walker
ov sky
Ġcease fire
Ġse als
is oft
) ).
ĠFel ix
IT S
Ġt resp
ĠBlock chain
ew are
ĠSch war
en ne
mount ed
ĠBe acon
les h
Ġimmense ly
Ġche ering
Em ploy
sc ene
ish ly
atche wan
ĠNic olas
Ġdr ained
ĠEx it
ĠAz erb
j un
Ġflo ated
u ania
De ep
Ġsuper v
Ġmyst ical
ĠD ollar
ĠApost le
ĠR EL
ĠProv ided
ĠB ucks
ãĥ ´
cut ting
Ġenhance ments
ĠPengu ins
ĠIsa iah
Ġj erk
ĠW yn
Ġst alled
Ġcryptoc urrencies
ĠR oland
sing le
Ġl umin
ĠF ellow
ĠCap acity
ĠKaz akh
W N
Ġfin anced
38 9
Ġt id
Ġcoll usion
ĠMy r
î Ģ
Sen ator
Ġped iatric
Ġneat ly
Ġsandwic hes
ĠArchitect ure
Ġt ucked
Ġbalcon y
Ġearthqu akes
qu ire
F uture
Ġhe fty
é Ĺ
Ġspecial izes
Ġstress es
Ġs ender
Ġmisunder standing
Ġep ile
Ġprov oke
ĠCol ors
Ġdis may
uk o
[ _
58 6
ne utral
Ġdon ating
ĠRand all
Mult i
Ġconvenient ly
ĠS ung
ĠC oca
Ġt ents
ĠAc celer
Ġpart nered
27 2
ir ming
ĠB AS
s ometimes
Ġobject ed
ub ric
p osed
LC S
gr ass
Ġattribut able
V IS
Israel i
Ġrepe ats
ĠR M
v ag
ut a
in ous
Ġin ert
ĠMig uel
æ Ń
ĠHawai ian
B oard
Ġart ific
ĠAzerb ai
as io
ĠR ent
A IN
Ġappl iances
Ġnational ity
Ġass hole
ĠN eb
Ġnot ch
h ani
ĠBr ide
Av ailability
Ġintercept ed
Ġcontin ental
Ġsw elling
ĠPers pect
b ies
. <
ith metic
ĠL ara
Ġtempt ing
add r
Ġoversee ing
cl ad
ĠD V
ĠGing rich
Ġm un
ĠApp ropri
Ġalter ations
ĠPat reon
Ġha voc
Ġdiscipl ines
Ġnotor iously
aku ya
ier i
? ).
ĠW ent
Ġsil icon
Ġtre mb
Cont ainer
K nown
Ġmort ar
est e
ick a
Ar thur
ĠPre viously
ĠMart y
Ġsp arse
g ins
Ġin ward
ĠParticip ant
C opy
ĠM isc
Ġantib iotic
ĠRet ro
Ġel usive
Ġass ail
ĠBatt alion
ĠB ought
Ġdimin ish
ĠEuro pa
s ession
ĠDanger ous
ies el
Ġdisbel ief
Ġbl asts
ext reme
ĠBoy d
ĠProject s
ĠGu ys
Ġunder gone
Ġgr ill
ĠDw ight
Ġ19 7
US ER
Ġfiles ystem
Ġcl ocks
T aylor
Ġwra pper
Ġfold ing
ous and
ĠPhilipp ine
ATION AL
ĠPer th
Ġas hes
Ġaccum ulate
ĠGate way
Sh op
orks hire
H an
ĠBar rel
ĠLe h
ĠX V
Ġwh im
Ġrep o
ĠC G
ĠM am
Ġincorpor ating
Ġbail out
Ġlingu istic
Ġdis integ
C LE
Ġcinem atic
ĠF iber
S yn
il ion
ĠCom pos
c hens
Ġne oc
Ġbo iled
F INE
on o
un cle
ik en
ĠB M
Î ¹
Ġreceipt s
Ġdisp osed
ĠTh irty
ĠR ough
ĠA BS
Ġnot withstanding
oll en
# $
Ġunrel iable
Ġbl oom
Ġmedi ocre
Ġtr am
ĠTas man
Ġsh akes
Ġmanifest o
ĠM W
Ġsatisf actory
Ġsh ores
Ġcomput ation
Ġassert ions
orm ons
ar ag
ab it
Dem ocrats
ĠL oot
ĠVol ks
ha ired
Ġgrav itational
S ing
ĠM iz
Ġthro ttle
Ġtyr anny
ĠView s
Ġrob ber
ĠMinor ity
Ġsh rine
sc ope
pur pose
Ġnucle us
our cing
ĠUS DA
ĠD HS
w ra
ĠBow ie
Sc ale
ĠB EL
x i
I ter
Ġ( ),
w right
Ġsail ors
ous ed
NAS A
ĠPro of
ĠMin eral
t oken
ĠF D
R ew
Ġe ll
6 30
Ġchance llor
ĠG os
Ġamount ed
ĠRec re
ome z
ĠOpt im
ĠOl ive
Ġtrack er
ow ler
ĠUn ique
R oot
Ġmar itime
ĠQur an
ĠAd apt
Ġecosystem s
ĠRe peat
ĠS oy
ĠI MP
Ġgrad uating
and em
P ur
ĠRes et
ĠTr ick
ĠPh illy
ĠT ue
ĠMalays ian
Ġclim ax
Ġb ury
Ġcons pic
ĠSouth ampton
ĠFl owers
Ġesc orted
ĠEduc ational
ĠI RC
Ġbrut ally
e ating
Ġpill ar
ĠS ang
ĠJ ude
ar ling
ĠAm nesty
Ġrem inding
ĠAdminist rative
hes da
Ġfl ashed
ĠP BS
per ate
fe ature
Ġsw ipe
Ġgra ves
oult ry
26 1
bre aks
ĠGu er
Ġsh rimp
ĠV oting
qu ist
Ġanaly tical
Ġtables poons
ĠS OU
Ġresear ched
Ġdisrupt ed
Ġj our
Ġrepl ica
Ġcart oons
b ians
} )
c opy
G ot
ou ched
P UT
Ġsw arm
not ations
s aid
Ġreb uilt
Ġcollabor ate
Ġr aging
Ġn ar
Ġdem ographics
ĠD DR
Ġdist rust
oss ier
ĠK ro
Ġpump kin
Ġreg rets
Ġfatal ities
ĠL ens
ĠO le
p d
Ġpupp et
ĠOut look
ĠSt am
O l
F air
U U
Ġre written
Ä ±
Ġfasc inated
Ġve ctors
Ġtrib unal
u ay
ĠM ats
ĠCo ins
[ [
Ġ18 1
Ġrend ers
ĠK aepernick
Ġesp ionage
Ġsum m
Ġd itch
Acc ount
Ġspread sheet
Ġmut ant
p ast
40 7
Ġd ye
Ġinit iation
Ġ4 000
Ġpunish able
Ġth inner
ĠKh al
Ġinter medi
D un
ĠGoth am
Ġeager ly
Ġvag inal
p owers
V W
ĠWATCH ED
Ġpred ator
ams ung
Ġdispar ity
Ġ[ *
Ġam ph
Ġout skirts
ĠSpir its
Ġskelet al
Ð »
ĠR ear
Ġissu ance
ĠLog ic
re leased
Z Z
ĠB ound
Ent ry
Ġex its
is ol
ĠFound er
Ġw re
ĠGreen land
ĠM MO
t aker
IN C
ãģ ¾
Ġhour ly
hen ko
Ġfantas ies
Ġdis ob
Ġdemol ition
ãĥ ĭ
Ġen listed
rat ulations
Ġmis guided
Ġens ured
Ġdiscour aged
m ort
Ġfl ank
Ġc ess
Ġreact s
ĠS ere
s ensitive
ĠSer pent
ass ad
Ġ24 7
Ġcalm ly
b usters
Ġble ed
ĠSt ro
Ġamuse ment
ĠAntar ctica
Ġs cept
ĠG aw
a q
ason ic
Ġsp rawling
n ative
atur ated
ĠBattle field
IV ERS
E B
ĠG ems
ĠNorth western
ĠFil ms
ĠAut omatic
Ġappre hend
ãģ ¨
Ġgui Name
Ġback end
Ġevid enced
ge ant
01 2
ĠS iege
Ġexternal To
Ġunfocused Range
ĠguiActiveUn focused
Ġgui Icon
ĠexternalTo EVA
ĠexternalToEVA Only
F ri
ch ard
en aries
Ġchief s
Ġc f
ĠH UD
Ġcorro bor
Ġd B
ĠT aken
ĠPat ricia
ra il
ĠCh arm
ĠLiber tarian
rie ve
Person al
ĠO UR
ger ies
Ġdump ing
Ġneurolog ical
it imate
ĠClint ons
raft ed
ĠM olly
Ġtermin als
reg ister
Ġfl are
Ġenc oded
Ġautop sy
p el
m achine
Ġexempt ions
ĠRoy als
d istance
Ġdraft s
Ġl ame
ĠC unning
Ġsp ouses
ĠMark ets
ĠCar rier
Ġimp lying
ĠY ak
s id
Ġl oser
Ġvigil ant
Ġimpe achment
Ġaug mented
ĠEmploy ees
Ġunint ended
tern ally
ĠW att
Ġrecogn izable
ess im
æ Ŀ
Ġco ated
r ha
Ġlie utenant
ĠLegisl ation
pub lished
44 4
01 3
Ġide ally
ĠPass word
Ġsimpl ify
ĠMet a
ĠM RI
Ġple ading
organ ized
hand ler
Ġun ravel
cor rect
Ġ icy
Ġparan oid
Ġpass er
Ġinspect ions
of er
ĠHealth care
28 3
ĠBr ut
iol a
for ge
ĠMed ieval
MS N
ie vers
ĠProgram ming
å ī
Ġ2 23
m u
ĠC LE
ug a
Ġsho ppers
Ġinform ative
ĠPl ans
Ġsupplement ation
ĠT ests
ty ard
ocy tes
ĠVeg a
ĠGujar at
erman ent
Ex cept
ĠL OT
all a
ĠC umm
ĠO sw
Ġven om
ĠDeb t
ĠD OWN
Ġreun ion
Ġm uc
ĠRel ief
Ġge op
ĠðŁ ĺ
al ogue
An th
ech o
Ġcor ros
Ġrepl ication
ĠBl azing
ĠD aughter
Ġinf lic
ĠLind sey
Ù Ī
28 4
Ex it
Ġgl oom
TA IN
Ġundermin ing
Ġadv ising
h idden
Ġover flow
Ġg or
urd ue
Ġe choes
enh agen
Ġimp uls
d rug
c ash
Ġas ync
Ġmir ac
at ts
p unk
Ġpiv ot
ĠLegisl ative
Ġblog gers
ĠCl aw
s burg
d yl
ĠRecomm end
Ġver te
Ġprohib iting
ĠPant her
Jon athan
Ġo min
Ġhate ful
28 1
ĠOr che
ĠMurd och
down s
Ġas ymm
G ER
Al ways
Ġinform s
ĠW M
ĠP ony
ĠApp endix
ĠAr lington
J am
Ġmedic inal
ĠS lam
IT IES
Ġre aff
ĠR i
F G
S pring
b ool
Ġthigh s
Ġmark ings
ĠRa qqa
ĠL ak
p oll
ts ky
ĠMort y
ĠDef inition
Ġdeb unk
end ered
ĠLe one
a vers
Ġmortg ages
App arently
N ic
ha us
ĠTh ousands
au ld
Ġm ash
sh oot
Ġdi arr
Ġconscious ly
H ero
e as
ĠN aturally
ĠDestroy er
Ġdash board
serv ices
R og
Ġmillenn ials
Ġinv ade
- (
Ġcomm issions
ĠA uckland
Ġbroadcast s
Ġfront al
Ġcr ank
ĠHist oric
Ġrum ours
CT V
Ġster il
Ġboost er
rock et
ãĤ ¼
ut sche
ĠP I
Ġ2 33
ĠProdu cer
ĠAnaly tics
Ġinval uable
Ġunint ention
ĠC Y
Ġscrut in
Ġg igg
Ġeng ulf
Ġprolet ariat
Ġh acks
ĠH ew
ar ak
ĠSl ime
ield ing
ag her
ĠEll iot
Ġtele com
Ġ2 19
ult an
ĠAr bor
ĠSc outs
B an
Ġlifes pan
Ġbl asp
38 8
Ġjud iciary
ĠContin ental
ask ing
Mc C
L ED
Ġbag gage
ĠSorce rer
Ġrem nants
ĠGriff ith
ets u
ĠSub aru
ĠPerson ality
des igned
ush ima
agn ar
Ġrec oil
Ġpass ions
\ ":
Ġte e
Ġabol ition
ĠCreat ing
j ac
Ġ19 4
01 9
Ġpill ars
ric hed
/ "
t k
Ġlive lihood
Ġro asted
ah on
ĠH utch
ass ert
Ġdivid end
Ġkn it
Ġd aunting
Ġdisturb ance
Ġsh ale
Ġcultiv ated
Ġrefriger ator
L B
ĠN ET
Ġcommercial s
Ġthink ers
45 5
Ġch op
B road
Ġsuspic ions
Ġtag ged
l ifting
Ġsty lish
ĠShield s
Short ly
Ġt ails
A uth
ST E
ĠG AME
Ġse ism
ĠK is
olog ne
Ġcow ork
Ġforc ibly
Ġthy roid
ĠP B
AN E
mar ried
h orse
Ġpoly mer
ĠCh al
od or
DE BUG
ĠCon text
Ġbl iss
Ġpin point
ĠMat hemat
leg ram
ĠWeek end
Ġlab elled
Ġb art
it les
Ġest rogen
âĢĶâĢĶâĢĶâĢĶâĢĶâĢĶâĢĶâĢĶ âĢĶâĢĶâĢĶâĢĶâĢĶâĢĶâĢĶâĢĶ
" '
Ġvis ibly
Ġouts ider
aid a
Are a
Ġdisse min
Ġdish onest
ĠCl osed
ĠBullet in
ĠRam sey
sw ord
ĠX I
our ced
S ame
34 6
ĠRe pe
ĠK ou
c ake
em is
C ache
ĠMe aning
ĠEn light
onom y
Ġmanifest ation
sw orth
J ay
Ġch ore
Ã¶ r
D ream
Ġsanction ed
Ġcult urally
ĠA ra
N av
Ġthe ological
Ġstr ut
ĠV O
ĠHand book
Ġconstruct ing
ĠÂ ¶
ĠBenef its
ĠPsych ological
s ac
å ¸
p olicy
ĠMat ters
ĠReport ed
ĠBy te
Ġvit ro
ĠM aiden
Ġl am
ĠJenn ings
Ġgar ment
ĠRut gers
ĠStaff ord
ĠWell ington
Ġinter mitt
Ġn pm
Ġord eal
Ġplug ged
o oming
in ished
fram ework
Ġtim ber
Ġc ass
Ġ8 50
il ess
ĠRed ux
7 68
St re
Ġsurpass ed
w hel
Ġparalle ls
Ġve il
ĠG I
ĠR EST
Ġread iness
s ort
Ġmod ifying
ĠSl ate
ru ff
Ġmar ble
Ġinf rared
Ġaud itor
ĠFANT ASY
ĠP overty
ĠS PD
Ġ" (
K y
RA Y
Ġexecut ions
ĠBever ly
ĠMarx ism
ĠBur st
ĠK ali
est ones
Clear ly
E ll
ãģ §
ĠProceed ings
T oken
IF IC
Ã± a
Cent ral
ĠH aley
ĠD rama
Ġform ations
OR N
Book s
Ġdom inating
ĠFly ers
ĠCompan ion
Ġdiscipl ined
ĠYug oslav
ĠSpell s
Ġv engeance
Ġland lords
L en
ĠO gre
ano ia
Ġpier cing
Ġcon greg
Ġscore r
ob ia
Ġnic kel
ĠLear ns
Ġre jo
Ġmaster piece
Fl ash
Ġinhab ited
ĠOpen GL
ĠD ud
ĠI CO
Ġar ter
Ġpl ur
Ġmaster y
Ġlong standing
st ed
Ġw ines
Ġtelev ised
ĠSh rine
ĠBay ern
Ġâ ĵĺ
Ġencl osure
j ohn
Ġprophe ts
ĠRes urrection
ĠOrd ers
Ġun even
r als
Ġd wind
ĠL ah
ĠSl oven
37 8
Ġins istence
aff le
ĠCl one
Ġhard ship
ĠCongress man
Ġple ad
Ġreview ers
Ġc ured
Ġ19 35
as ley
f ake
ĠTh inking
yd ia
P ART
ĠD ota
o it
Ġwh ipped
Ġb ouncing
ĠHispan ics
com ings
Ġcann abin
ĠCh ambers
ĠZ ack
Option al
Ġco ats
Ġprow ess
ĠNort on
Ġplain ly
Ġfre ight
Ġinhib ition
Ġcl am
Ġ30 3
ke f
ale igh
L uke
Ġpsych o
ator ium
M ED
Ġtreat ies
Ġind isc
Ġd c
OP S
Ġresil ient
ĠInter state
Ġsl ack
Ġmund ane
Ġestab lishes
35 9
Ġstr ained
Ġn ond
S us
Ġcast e
ar ate
ie ving
Ġunfair ly
Ġpars er
on ial
urs ive
V ia
ĠOtt o
ĠAuthor ities
stro ke
K R
ĠMer cy
Ġfurn ished
Ġout set
Ġmet ic
19 82
olith ic
ĠT ent
og ical
ĠA ircraft
Ġh ides
ĠBec ame
Ġeduc ators
re aching
Ġvol atility
Ġtodd ler
ĠNAS CAR
ĠTw elve
ĠHigh lights
Ġgra pe
Ġspl its
Ġpe asant
Ġre neg
ĠMS I
Tem p
st ars
Ġtre k
ĠHy de
b inding
Ġreal ism
Ġox ide
ĠH os
Ġmount s
Ġbit ing
Ġcollaps ing
Ġpost al
Ġmuse ums
Ġdet ached
Ġrespect ing
Ġmonop ol
Ġwork flow
ĠC ake
Tem plate
ĠOrgan isation
Ġpers istence
36 9
C oming
B rad
Ġredund ant
ĠG TA
Ġb ending
Ġrev oked
Ġoff ending
Ġfram ing
Ġprint f
Comm un
mem bers
Out side
Ġconst rued
Ġc oded
F ORE
Ġch ast
Ch at
Ind ian
ĠY ard
? !"
ĠP orts
ĠX avier
ĠR ET
' ."
ĠBo at
iv ated
ich t
umer able
D s
ĠDun n
Ġcoff in
Ġsecure ly
ĠRapt ors
ĠB es
Install ation
Ġin ception
ĠHealth y
end ants
Ġpsych ologists
ĠShe ikh
c ultural
ĠBlack Berry
sh ift
F red
oc he
Ġc akes
ĠS EO
ĠG ian
ĠAs ians
og ging
e lement
Ġpund its
ĠV augh
ĠG avin
Ġh itter
Ġdrown ed
Ġch alk
ĠZ ika
Ġmeas les
80 2
âĢ¦ ..
ĠAW S
] "
Ġdist ort
ĠM ast
Ġantib odies
ĠM ash
Mem ory
ĠUg anda
ĠPro b
Ġvom iting
ĠTurn s
Ġoccup ying
Ġev asion
ĠTher apy
Ġprom o
Ġelect r
Ġblue print
ĠD re
pr iced
ĠDep ot
Ġallev iate
ĠSom ali
m arg
n ine
Ġnostalg ia
ĠShe pherd
Ġcaval ry
Ġtor ped
ĠBlood y
x b
Ġs ank
Ġgo alt
report print
embed reportprint
clone embedreportprint
ĠIn itially
ĠF ischer
Ġnot eworthy
c ern
Ġin efficient
raw download
rawdownload cloneembedreportprint
c ation
ĠD ynasty
l ag
D ES
Ġdistinct ly
ĠEston ia
Ġopen ness
Ġg ossip
ru ck
W idth
ĠIb rahim
Ġpet roleum
Ġav atar
ĠH ed
ath a
ĠHog warts
Ġc aves
67 8
Ġsafegu ard
ĠM og
iss on
ĠDur ham
sl aught
ĠGrad uate
Ġsub conscious
ĠEx cellent
ĠD um
---- -
Ġp iles
ĠW ORK
ĠG arn
ĠF ol
ĠAT M
Ġavoid s
ĠT ul
Ġble ak
EL Y
iv ist
light ly
P ers
ĠD ob
ĠL S
Ġins anity
Î µ
atal ie
En large
Ġtw ists
Ġfault y
Ġpir acy
Ġimp over
Ġrug ged
ĠF ashion
Ġs ands
' ?
sw ick
Ġn atives
Ġhe n
ĠNo ise
ãĥ Ĺ
Ġg reens
Ġfree zer
Ġd ynasty
ĠFather s
ĠNew ark
Ġarchae ological
Ġo t
ob ar
Ġblock ade
Ġall erg
L V
Ġdeb it
ĠR FC
ĠMil ton
ĠPress ure
Ġwill ingly
Ġdisproportion ate
Ġopp ressive
Ġdiamond s
Ġbelong ings
19 70
Ġbell s
Ġimperial ism
Ġ2 27
Ġexpl oding
ĠE clipse
Ġ19 19
Ġr ant
Ġnom inations
34 7
Ġpeace fully
ric a
ĠF UCK
Ġvib ration
mal ink
Ġro pes
ĠIv anka
ĠBrew ery
ĠBook er
ĠOw ens
go ers
Serv ices
ĠSn ape
Ġ19 1
39 5
Ġ2 99
just ice
Ġb ri
Ġdisc s
Ġprom inently
Ġvul gar
Ġsk ipping
l ves
Ġtsun ami
37 4
ĠU rug
ĠE id
rec ated
p hen
Ġfault s
ĠStart ed
9 50
Ġp i
Ġdetect or
Ġbast ard
Ġvalid ated
Space Engineers
OUR CE
Ġ( ~
Ġuns ur
Ġaff irmed
Ġfasc ism
Ġres olving
ĠCh avez
ĠC yn
Ġdet ract
L ost
Ġrig ged
Ġhom age
ĠBrun o
55 5
ec a
Ġpress es
Ġhum our
Ġsp acing
Ġ' /
olk ien
C oun
OP ER
T re
S on
ĠCambod ia
ier re
m ong
o zy
Ġliquid ity
ĠSov iets
ĠFernand o
Ġ2 29
Ġsl ug
ĠCatal an
elect ric
Ġsc enery
ĠH earth
Ġconst rained
Ġgoal ie
ĠGu idelines
ĠAm mo
ĠPear son
Ġtax ed
Ġfet us
Resp onse
ĠAlex is
th ia
G uy
Ġrecon struct
Ġextrem es
Ġconclud ing
ĠP eg
ook s
Ġded uctions
R ose
Ġground breaking
ĠT arg
ãĥ ģ
ĠRe ve
res ource
Ġmo ons
Ġelectrom agnetic
Ġamid st
ĠVik tor
N ESS
B ACK
Ġcomm ute
ĠAna heim
Ġfluct uations
6 40
Ġnood les
ĠCop enhagen
ĠT ide
ĠGri zz
ĠS EE
Ġpip elines
Ġsc ars
end o
ag us
ĠE TF
/ #
ĠBec ome
44 8
Ġvis c
ĠRecomm ended
Ġj umper
Ġcogn ition
Ġassass in
Ġwitness ing
ĠSet up
Ġl ac
v im
IS M
p ages
SS L
35 8
Ġad ject
indust rial
l ore
cher y
Ġgl itter
Ġc alf
Flor ida
Ġspoil ers
Ġsucceed s
Ġch anting
Ġslog ans
ĠTr acy
Vis it
rol ogy
Ġm ornings
Ġline age
Ġs ip
Ġintense ly
Ġflour ish
ĠSle eping
ĠF em
or por
ĠK lan
ĠDar th
h ack
ĠNi elsen
Ġtum ors
Ġprocure ment
ĠY orkshire
Ġra ided
K Y
An na
Ġ// [
ĠDis order
ĠMust ang
ĠW en
ĠTry ing
s q
Ġdeliver ies
Ġshut ter
Ġcere bral
Ġbip olar
ĠC N
l ass
j et
Ġdeb ating
> :
Ġe agle
gr ades
ĠD ixon
UG C
M AS
ĠDr aco
ĠMach ines
aff er
Ġem an
Â ²
pr on
ĠG ym
Ġcompar atively
ĠTrib unal
PR O
Ġle x
Ġfert ile
Ġdep ressing
Ġsuperf icial
ess ential
ĠHun ters
g p
Ġprom inence
L iber
ĠAn cest
ote chnology
Ġm ocking
ĠTra ff
ĸ ļ
Med ium
I raq
Ġpsychiat rist
Quant ity
ĠL ect
Ġno isy
5 20
G Y
Ġsl apped
ĠM TV
Ġpar a
p ull
Mult iple
as her
Ġn our
ĠSe g
Spe ll
v ous
ord ial
Sen ior
ĠGold berg
ĠPl asma
ne ed
Ġmess enger
ere t
Ġteam ed
Ġliter acy
ĠLe ah
ĠD oyle
Ġem itted
U X
Ġev ade
Ġm aze
Ġwrong ly
ĠL ars
Ġstere otype
Ġpled ges
Ġarom a
ĠM ET
Ġac re
ĠO D
Ġf f
Ġbrew eries
ĠH ilton
und le
ĠK ak
ĠThank fully
ĠCan ucks
in ctions
ĠApp ears
Ġco er
Ġundermin ed
ro vers
And re
Ġbl aze
um ers
Ġfam ine
amp hetamine
ulk an
Am ount
Ġdesper ation
wik ipedia
develop ment
ĠCor inth
uss ia
Jack son
L I
N ative
R s
Oh io
ĠKath leen
F ortunately
Ġattend ant
ĠPre ferred
ĠDid n
ĠV s
M is
Ġrespond ent
Ġb oun
st able
Ġp aved
Ġunex pl
ĠChe ney
L M
ĠC ull
bl own
Ġconfront ing
oc ese
serv ing
W i
ĠLith uania
ann i
Ġst alk
h d
Ġv ener
AP H
ynchron ous
UR R
um ably
hist oric
H alf
H ay
Ġresil ience
spe ction
Ġabandon ing
O bs
ĠDeb bie
Ġgrad ient
ĠPl aint
ĠCan al
AR CH
Ġexpans ive
Ġfun g
Ġb ounced
U nd
Ġprec autions
Ġclar ification
Ġd agger
Ġgri ps
ĠÂ µ
ĠRiver a
ĠUnd ead
is ites
ĠFIR ST
Ã± o
aud i
Ġhost ages
Ġcompl iant
Ġal umni
Se ven
Ġcyber security
e ither
Col lect
Ġinvari ably
ĠS oci
Ġlaw maker
Ġa le
ĠPerson ally
N azi
Ġcustom ization
ĠPro c
ĠSask atchewan
eat uring
Ġsp ared
Ġdiscontin ued
Ġcomput ational
ĠMotor ola
Ġsuprem acist
government al
Ġparad ise
ĠDown ing
ĠNik on
Ġcat alyst
ber ra
Tor onto
8 75
bet a
ĠMac ron
Ġunreal istic
ve ctor
ĠVeh icles
it iveness
ĠR V
ĠCol bert
s in
o ji
ent in
ĠKr ish
hell o
ff ield
ok y
ĠT ate
Ġmap le
Ġa ids
chem ical
33 4
n uts
ĠWar p
Ġx x
ĠRob b
umer ous
_- _
ft ime
ĠV W
Ġw inger
ĠD ome
t ools
ĠP V
ĠGe orgetown
Ġg eared
Ġjihad ists
Ġc p
Ġster oids
M other
cler osis
ĠDR M
nes ia
Ġl inger
Ġimm ersive
ĠC OUN
Ġoutwe igh
ens ual
B and
Ġtransform s
mat ched
ps ons
ĠJud icial
f actor
Ġrefer ral
Ġodd ly
ĠW enger
B ring
ĠB ows
60 2
IC LE
Ġl ions
ĠAcad emic
ĠTh orn
ĠRa ider
kef eller
St orage
L ower
ĠOr t
ĠEqu ality
AL T
ĠS OC
T ypes
Ġl yn
ĠAss et
co at
TP P
C VE
ĠPione er
app lication
Mod ern
ĠH K
En vironment
Al right
R ain
IP P
ĠShi ite
Ġm ound
ĠAb ilities
cond ition
St aff
Ġcompet ence
ĠM oor
ĠDi ablo
Ġwith held
Ġost ensibly
ĠB rom
Ġms g
Ġden omin
ĠRef erences
ĠF P
Ġplun ged
Ġp amph
m oving
cent ral
Ġdown right
Ġf ading
T al
T yp
ĠTh y
uk es
it he
Ġo ve
Ġbatt led
Ġseaf ood
Ġfig ur
ĠR D
c rop
Ġsqu ads
{ \
à ¹
ĠE h
Ġinterview ing
ĠQ in
Ġas piring
PL IC
Ġcla uses
ĠG ast
ĠN ir
Ġl uggage
Ġh ose
Ġsystem d
Ġdesc ending
ĠRev ised
ĠR ails
al ign
70 9
33 7
Ġf ug
charg ing
t ags
Ġut er
k ish
WAR NING
49 0
prof its
Ġvoy age
Ġa ce
ĠV anguard
ĠT anks
ĠM uk
Ġ2 26
S afe
Ar mor
Ġvolcan ic
Ġwom b
ĠM IL
Ġbegin ner
ĠRec ogn
ĠA AP
PL AY
) !
Ġdetect ing
c n
Ġbre aches
Bas ically
ĠP ag
ĠMunicip al
ĠInd ie
ĠL af
ĠDis able
ĠOl son
Ġrest rained
Ġrul ings
Ġhum ane
ev ents
ĠCinem a
display Text
ĠH atch
action Date
onna issance
Ġassault ing
ĠL ug
CH AT
Ġvig orous
ĠPer se
Ġintoler ance
ĠSnap chat
ĠSh arks
Ġd ummy
ĠDi agn
ĠGu itar
im eters
40 3
RE G
A x
Ġsepar ates
ĠMah m
Ġt v
j ah
O OL
C irc
ĠWinds or
uss ian
Ġintu ition
Ġdis dain
ĠDon ovan
Ġ2 21
E mb
Ġcondem ning
Ġgener osity
zz y
Ġpant ies
ĠPre vent
Action Code
AN A
34 2
external ActionCode
Ġspec ifying
Ġcryst all
J ere
Ġru pt
ĠApp rentice
Ġprof iling
Ð º
St rike
Ġsid eline
Ġoblig ated
Ġocc ult
Ġbureaucr atic
ant ically
rupt ed
neg ative
ĠEthiop ia
ĠC ivic
Ġins iders
el igible
ĠTV s
ĠB AR
ĠT I
i ologist
ĠA IR
Ġsubstit uted
Ar ab
ĠS aul
ĠY og
p rem
Ġbuild ers
Ġstation ary
Ġdoubt ful
Ġvig orously
Ġthr illing
Ph ysical
ĠCare y
ĠHyd ra
geon ing
ĠS ly
y ton
Ġborrow ers
ĠPark inson
Ġ ë
ĠJama ica
Ġsat ir
Ġinsurg ents
ĠF irm
Ġis ot
ĠK arn
our ning
ak ens
doc s
l ittle
ĠMon aco
CL ASS
Tur key
L y
ĠCon an
ass ic
Ġstar red
ĠPac ers
et ies
Ġt ipping
M oon
ĠR w
s ame
Ġcav ity
Ġgo of
ĠZ o
Sh ock
um mer
Ġemphas izes
Ġreg rett
Ġnovel ty
Ġen vy
ĠPass ive
r w
50 5
Ġind ifferent
ĠR ica
ĠHim self
ĠFred die
Ġad ip
ä¸ Ģ
Ġbreak out
Ġhur ried
ĠHu ang
ĠD isk
Ġro aming
?????- ?????-
U V
ĠRick y
ĠS igma
Ġmarginal ized
Ġed its
Ġ30 4
mem ory
Ġspec imen
29 3
ãģ ¯
Ġvert ically
Ġaud ition
ĠHe ck
Ġc aster
ĠHold ings
ad al
ĠC ron
ĠL iam
Ġdef lect
P ick
ĠDeb ug
RE F
Ġvers atility
ot hes
class ified
ĠMah ar
ĠH ort
C ounter
st asy
not iced
33 1
ĠSh im
f uck
ĠB ie
Ġair ing
ĠPro tein
ĠHold ing
Ġspect ators
ili ated
ĠThat cher
n osis
ãĥ¼ ãĥ³
Te le
B oston
ĠTem pl
st ay
Ġdecl arations
47 9
Vol ume
ĠDesign er
ĠOver watch
id ae
Ġon wards
Ġn ets
ĠMan ila
part icularly
Ġpolit ic
o other
Ġport raits
Ġpave ment
c ffff
Ġs aints
Ġbegin ners
ES PN
Ġshort comings
âķĲ âķĲ
Ġcom et
ĠOrgan ic
qu el
Ġhospital ized
Bre ak
Ġpe el
dyl ib
asp x
ur ances
ĠT IM
P g
Ġread able
ĠMal ik
Ġm uzzle
Ġbench marks
d al
ĠV acc
ĠH icks
60 9
ĠB iblical
he ng
Ġover load
ĠCivil ization
Ġimm oral
Ġf ries
ãĤ Ĵ
Ġreprodu ced
Ġform ulation
j ug
ire z
g ear
Ġco ached
Mp Server
ĠS J
ĠK w
In it
d eal
ĠO ro
ĠL oki
ĠSong s
Ġ23 2
ĠLou ise
asion ally
Ġunc ond
olly wood
Ġprogress ives
ĠEn ough
ĠDo e
Ġwreck age
Ġbr ushed
ĠBase Type
Ġz oning
ish able
het ically
ĠC aucus
ĠH ue
Ġk arma
ĠSport ing
Ġtrad er
Ġseem ing
ĠCapt ure
4 30
b ish
Ġt unes
Ġindo ors
ĠSp here
ĠD ancing
TER N
Ġno b
ĠG ST
m aps
Ġpe ppers
F it
Ġoverse es
ĠRabb i
ĠR uler
vert ising
off ice
xx x
Ġra ft
Ch anged
Ġtext books
L inks
ĠO mn
ãĢ ĳ
Ġinconven ience
ĠDon etsk
= ~
Ġimplicit ly
Ġboost s
ĠB ones
ĠBo om
Cour tesy
Ġsens ational
AN Y
Ġgre edy
ed en
Ġinex per
ĠL er
ĠV ale
Ġtight en
ĠE AR
ĠN um
Ġancest or
S ent
ĠH orde
urg ical
all ah
Ġsa p
amb a
ĠSp read
tw itch
Ġgrand son
Ġfract ure
Ġmoder ator
ĠSe venth
ĠRe verse
Ġestim ation
Cho ose
Ġpar ach
Ġbar ric
ãĢ Ĳ
Ġcomp ass
Ġall ergic
âĢ ķ
OT HER
err illa
Ġw agon
Ġz inc
Ġrub bed
ĠFull er
ĠLuxem bourg
ĠHoo ver
Ġli ar
ĠEven ing
ĠCob b
est eem
Ġselect or
ĠB rawl
is ance
ĠE k
Ġtro op
Ġg uts
ĠApp eal
ĠTibet an
Ġrout ines
ĠM ent
Ġsummar ized
steam apps
Ġtr anqu
Ġ19 29
or an
ĠAut hent
Ġg maxwell
Ġappre hens
Ġpo ems
Ġsa usage
ĠWeb ster
ur us
Ġthem ed
Ġl ounge
Ġcharg er
Sp oiler
Ġsp illed
h og
ĠSu nder
ĠA in
ĠAng ry
Ġdis qual
ĠFrequ ency
ĠEther net
Ġhel per
Per cent
Ġhorr ifying
Ġa il
ĠAll an
EE E
ĠCross ing
44 9
Ġh olog
ĠPuzz les
ĠGo es
eren n
60 4
ãģ ı
ĠRaf ael
Ġatt en
ĠE manuel
Ġup ro
ĠSus p
P sych
ĠTr ainer
ĠN ES
ĠHun ts
bec ue
Ġcounsel or
R ule
Ġtox ins
Ġb anners
r ifice
Ġgreet ing
Ġfren zy
Ġall ocate
Ġ* )
ex pr
50 3
ĠCh ick
ĠT orn
Ġconsolid ation
ĠF letcher
sw itch
fr ac
cl ips
ĠMcK in
ĠLun ar
Mon th
IT CH
Ġscholar ly
rap ed
39 8
Ġ19 10
Ġe greg
Ġin secure
Ġvict orious
cffff cc
Ġsing led
Ġel ves
ĠW ond
bur st
Ġcam oufl
ĠBL ACK
Ġcondition ed
ç ī
ans wered
Ġcompuls ory
asc ist
Ġpodcast s
ĠFrank furt
bn b
Ġne oliberal
ĠKey board
ĠBel le
w arm
Ġtrust s
Ġins ured
ĠBu cc
us able
60 7
ĠPl ains
Ġ18 90
Ġsabot age
Ġlod ged
f elt
Ġg a
ĠN arc
ĠSal em
Ġsevent y
ĠBl ank
p ocket
Ġwhis per
Ġm ating
om ics
ĠSal man
ĠK ad
Ġan gered
Ġcoll isions
Ġextraord inarily
Ġcoerc ion
G host
b irds
è Ģ
k ok
Ġper missible
avor able
Ġpo inters
Ġdiss ip
ac i
Ġtheat rical
ĠCos mic
Ġforget ting
Ġfinal ized
å¤ §
y out
l ibrary
Ġbo oming
ĠBel ieve
ĠTe acher
ĠL iv
ĠGOOD MAN
ĠDomin ican
OR ED
ĠPart ies
Ġprecip itation
ĠSl ot
R oy
ĠComb ined
Ġinteg rating
Ġch rome
Ġintest inal
ĠRe bell
Ġmatch ups
Ġblock buster
ĠLore n
ĠLe vy
Ġpre aching
ĠS ending
ĠPur pose
ra x
f if
Ġauthor itative
ĠP ET
ast ical
Ġdish on
Ġchat ting
Ġ"$ :/
Connect ion
Ġrecre ate
Ġdel inqu
Ġbro th
ĠD irty
ĠAd min
z man
Ġscholars hips
Ġ25 3
cont act
als a
7 67
c reen
abb age
Ġ19 15
Ġbl ended
Ġal armed
L anguage
35 6
Ġbl ends
ĠCh anged
W olf
Ġhe pat
Creat ing
Ġper secut
Ġsweet ness
art e
Ġforfe iture
ĠRober to
im pro
N FL
ĠMag net
Det ailed
Ġinsign ificant
ĠPOL IT
ĠBB Q
ĠC PS
Ġse aw
amin er
m L
end if
f inals
Ġ26 5
u ish
Ġ} )
ĠPro blems
Ġem blem
Ġserious ness
Ġpars ing
Ġsubst itution
Ġpress ured
Ġrecy cled
ale b
Rub y
Ġprof iciency
Dri ver
ĠW ester
: '
AF TA
Ġm antle
ĠClay ton
fl ag
Ġpractition er
c overed
ĠSt ruct
add afi
4 25
ĠTown ship
ĠHyd ro
Lou is
34 3
Ġcond o
ĠT ao
Ġutil ization
Ġnause a
ĠDem s
rid ges
p ause
Ġform ulas
Ġchall enger
37 6
Ġdefect ive
ĠRail way
ĠPub Med
Ġyog urt
l bs
ĠNor folk
OP E
ĠMood y
Ġdistribut or
Ġscroll s
Ġextract s
St an
Ġv iability
Ġexp oses
Ġstar vation
ĠStep s
ĠD odd
f ew
ST D
33 2
Ġclos ures
Ġcomplement ary
ĠS asha
ump y
Ġmon et
Ġartic ulate
ĠDo ct
k iller
Ġsc rim
Ġ2 64
Ġprost itutes
Ġse vered
Ġattach ments
Ġcool ed
L ev
ĠF alk
f ail
Ġpolic eman
ĠD ag
Ġpray ed
ĠK ernel
Ġcl ut
Ġc ath
Ġan omaly
St orm
em aker
ĠBreak fast
ul i
o ire
J J
h z
Oper ation
ĠS ick
35 4
ĠGuatem ala
R ate
Ġexp osures
f aces
ĠArch ae
ra f
ĠM ia
Ġ20 25
Ġop aque
Ġdisgu ised
ĠHead quarters
S ah
Ġp ots
9 78
ĠM alf
Ġfrown ed
Ġpoison ous
ĠCon vers
ee ks
Ġcr ab
." "
Ġtre ason
Ġr anc
Ġescal ating
Ġwar r
Ġmob s
Ġl amps
ĠSun shine
ĠBrun swick
Ph ones
Ġspe lled
ĠSk ip
Ġ20 50
Ġ19 11
ĠPl uto
ĠAm end
Ġme ats
38 7
Ġst omp
ĠZh ou
ĠLevi athan
ĠHaz ard
ad v
ĠOr well
Ġal oud
Ġb umper
ĠAn arch
ub untu
ĠSer ious
f itting
ĠOption al
ĠCec il
RE AM
Ġser otonin
Ġcultiv ate
ag ogue
} \
Ġmos ques
ĠSun ny
Ġre active
rev olution
ĠL up
ĠFed ora
Ġdefense man
ĠV ID
ist ine
Ġdrown ing
ĠBroad casting
Ġthr iller
ĠS cy
Ġacceler ating
Ġdirect s
od ied
b ike
d uration
Ġpain fully
R edd
Ġproduct ions
Ġg ag
Ġwh ist
Ġs ock
Ġinf initely
ĠConc ern
ĠCit adel
Ġlie u
Ġcand les
ogene ous
arg er
Ġheaven ly
inflamm atory
Per formance
C s
ruct ose
az aki
Ġp essim
Ġinf erence
Ġpow d
ĠZ oe
Ġpain ts
Ġd azz
pt a
-------- ---
Ġins pir
ĠExper imental
ĠKn ife
reg or
b ors
Ġshow ers
rom eda
Ġs aint
Ġben ign
ĠJ iang
Ġenvision ed
Ġsh roud
IF T
H O
Ġsh uff
ĠI CC
Ġse greg
Ġrevis it
ighth ouse
L i
Ġsub strate
ĠSe as
ĠRew ard
ĠH ep
ĠBr ass
s bm
Ġelim inates
Ġst amina
ĠV AT
ĠLo an
Ġconst raint
Ġappropri ated
Ġp es
ĠA LE
r anging
Ġ40 4
39 2
Ġintellectual s
ach u
Ġrestruct uring
ĠLe vin
Ġrun es
Ġdelight ful
Ġcarbohyd rates
ĠMod els
ĠExp o
Ġtransport ing
all oc
Ġring ing
S amsung
Ġscarce ly
ĠURL s
ĠM AS
Ġprot otypes
Ġnarr ator
ĠCPU s
cd n
ĠBart on
Ġdecided ly
ĠSh u
ix ir
oc ious
ĠMy st
N intendo
Ġre use
Ġforg iven
F ew
in ical
n at
Ġseam less
ĠEv a
ĠE VE
ĠJ O
land ers
Ġso fter
neg ie
Ġtrans ient
Ġorb ital
Ġfulf il
ĠK om
Hop efully
Ġdynam ically
ĠHun ger
å Ľ
ĠArmen ia
el man
ber to
Ġp ige
ĠID s
lim it
Ġve ins
Ġso aring
p acks
Gold en
ĠCr ab
ist or
ĠR PM
Ġ$ $
g ression
Ġjihad ist
Ġgam ble
Ġcare g
Ġinf lated
F ace
ĠFire arms
ĠEm manuel
â Ŀ
Ġsh ocks
gr ab
Ġspl end
ĠHP V
ab ortion
Ab ove
Ent ity
play ers
Ġcomm enced
ul ence
Ġfulfill ment
Ġembod iments
ĠW elfare
Ġha il
Ġ< @
tt en
Ġcat cher
ĠJ azeera
Ġvolcan o
Ġstabil ize
ĠHand ler
Ġintens ified
ĠAb rams
Ġhum iliation
p aced
60 5
ĠCent OS
Spe cific
Ġhe ed
ĠC AM
ĠGal ile
D ie
Ġabol ished
ĠThom son
ĠTe achers
ĠW ass
j ong
ĠIS BN
ĠAll ies
sh ake
å ·
v ict
How ard
Ġde em
Ġexceed ingly
ĠSmart stocks
ib e
Ġdoor way
Ġcompet ed
ig mat
Ġnational ists
Ġg room
ĠKe en
Ġdispos able
de cl
ĠT olkien
ĠSche me
Ġb iod
Ġav id
ĠEl on
ag ar
ĠT SA
R oman
Ġartific ially
Ġadvis ors
X L
ĠInf erno
36 6
Ġted ious
ĠPhot ography
ĠCar rie
Ġtro pe
ĠSand ra
Ġdec imal
Que en
ĠGund am
ĠO M
ote ch
N BA
Ġ19 32
Ġent renched
ĠMar ion
Ġfr aternity
Lab our
Hen ry
Ġlat itude
E ither
Ġenh ances
ĠPot ential
Ġsh ines
id ad
Ġbread th
Ġcapac ities
ĠðŁ ĻĤ
ĠBron x
Ġsex es
Ġdifferent iation
Ġheavy weight
ĠT aj
d ra
Ġmigr ate
Ġexhaust ion
ĠR UN
els ius
ĠCu omo
Ġgu itars
Ġcl ones
ĠSom ew
ĠP ry
------------ -
Ġwarr anted
cy cles
Ġsalv age
Ġdis ks
R ANT
ĠNGO s
ĠMart ian
":[ {"
Ġadd icts
oj ure
il let
Ġamazing ly
art ments
p ixel
ĠGPU s
Lay out
è £
ĠTam il
ĠBas il
Ġimpart ial
ĠSt ructure
f ork
b ryce
Ġr idge
ĠHamb urg
ri ous
Ġbl itz
cig arettes
Ġcan ned
40 2
Ġiron ically
Ġcompassion ate
ĠHaw kins
. #
ĠCat hedral
Ġrall ied
in ternal
Ġqu ota
st akes
T EXT
m om
Ġcomple tes
Ġ23 8
Ġsh rug
ãĥ ĳ
ĠN inth
Ġrev ise
ĠProv ider
Ġtre acher
Ġqu asi
ĠPR ES
Ġdep osition
Ġconfidential ity
iss ors
Ġim balance
Ġspan ning
Ġang ular
ĠC ul
commun ication
ĠNor a
ĠGen ius
op ter
Ġs acked
Sp ot
Ġfine ly
ĠCH R
28 2
w aves
Pal est
ĠRo hing
N L
è ¿
Ġsh itty
ĠSc alia
4 75
Pro gress
Ġreferen cing
Ġclass rooms
ab ee
Ġs od
hes ion
70 8
ĠZucker berg
ĠFin ish
ĠScot ia
ĠSav ior
ĠInstall ation
an tha
( -
Ġ30 2
ĠP unk
Ġcr ater
yout u
Ġro ast
Ġinflu encing
Ġd up
ĠJ R
ĠG rav
Ġstat ure
Ġbath rooms
A side
W iki
me an
ĠZ ak
ĠOn es
ĠN ath
Ġhyper t
Ġcommence ment
C ivil
Ġmoder ately
Ġdistribut ors
Ġbreast feeding
Ġ9 80
ĠS ik
ĠC ig
ĠAM ER
R IP
ĠCare er
ust ing
Ġmess ed
Ġe h
ĠJ ensen
/ $
Ġblack mail
Ġconvers ions
Ġscientific ally
Ġmant ra
p aying
Ġiv ory
ĠCour ts
OU GH
aunt let
Ser ial
B row
ĠH undreds
3 23
Ġpe e
Ġlin ux
Ġsub mer
ĠPrinc ipal
48 5
ĠD SL
ĠCous ins
Ġdoctr ines
ĠAthlet ics
Ġ3 15
ĠK arma
Ġatt ent
ur ger
Ġpresc ribe
Ġenc aps
ĠC ame
Ġsecret ive
ĠCr imes
d n
C lean
ĠEgypt ians
ĠCar penter
Ġ ll
H um
ĠMil o
Ġcapital ists
Ġbrief ed
T we
ĠBas in
elve t
M os
Ġplun ge
ĠKa iser
ĠFu j
ill in
Ġsafegu ards
Ġo ste
ĠOpportun ity
ĠM afia
ĠCall ing
ap a
ur ban
br ush
ill ard
c Ã©
int elligence
ĠL ob
ĠDru id
Ġsm oother
Ġfoot ing
Ġmotor ists
arc ity
Ġmascul inity
Ġm ism
Ġabdom inal
ĠTa vern
ĠR oh
Ġesc apes
s igned
Anth ony
Ġsacrific ing
Ġintim acy
Ġan terior
ĠK od
Ġmot if
Ġg raz
Ġvisual ization
Ġguitar ist
ĠTro tsky
m agic
D ar
ĠMor i
Ġw ards
Ġtoile ts
l est
Ġtele port
ĠSund ays
ĠPl at
ET S
Ġe Sports
Pat rick
ĠK atherine
en ko
Ġhas sle
ĠM ick
gg les
Ġh ob
aint ain
Ġair borne
Ġsp ans
Ġch ili
Ġa perture
Ġvolunte ered
ĠInc ident
ĠF res
ĠVeter an
augh tered
ing o
Ġun insured
CL OSE
Ġf use
Ġer otic
Ġadvert ise
ra ising
Text ure
Ġatt ends
ĠRE AL
udd led
Ġsm oot
Ġ30 5
ĠWill is
Ġbl ond
An alysis
ĠV T
on ica
Ġstrongh old
R F
N M
. >>
Ġprosper ous
Ġbo asted
29 2
ĠManufact uring
PR ESS
g ren
Ġpharm acy
ĠRoc kefeller
k ai
Ġth umbs
ĠH ut
Ġmother board
Ġguard ians
ĠAl ter
ll ular
Ġsh ack
Ġwise ly
Ġback bone
erv a
Ġsu icides
ĠMcG regor
ij ah
E mer
ĠB rav
Ġdesign ate
P OST
produ ced
Ġcleans ing
irl wind
ex istent
ĠHum ph
ĠPay ne
Ġv ested
Å ¡
Ġstring ent
ion a
Ġuns ub
Ġsum med
ĠHer cules
sub ject
ĠR agnar
ĠN os
Ġcharacter ization
Ġsav vy
ĠDaw son
ĠCas ino
Ġf ri
ĠBar rier
Ġmis information
Ġins ulation
Ġcorrid ors
Ġair planes
ĠNo ct
ah i
Ġ19 16
k b
arm ac
Ġsh un
Ġsche ma
Ġhorr ified
Ġ23 9
aund ers
N B
i ates
er ity
ĠSh ard
Ġr arity
Ġgroup ed
ĠGh ana
again st
ĠBi ological
ĠA ware
ow ell
Ï Ħ
ĠBe au
sh aw
H ack
ĠJul ius
US S
ol son
aun a
c ru
ĠMaur ice
ĠI k
Ġsequ encing
Ġradical s
Ġ( ?,
v irtual
Ġany ways
Ġreper c
Ġhand lers
Ġhes itant
é ĥ
ĠM F
ple mentation
ass ociated
Ġcampaign ed
ĠY ue
ut ations
ĠY oga
Ġsim mer
Ġro ds
Ġmel ody
Ġconv oy
v ideos
Ġscreen ed
N eg
ochem ical
Ġ( ))
Ġultr as
Ġant ip
ĠIsland ers
70 4
Ġfet ish
Ġridic ulously
ĠK art
Ġmitochond rial
Ġinterf ering
Build er
Ġover fl
Ġac ne
ĠM ud
ĠK err
f lex
ĠPost al
ĠBalt ic
47 7
ĠPers ons
our age
H B
ĠM use
ĠImm ortal
ĠDri ving
Ġpet itions
Ġsubsc ript
Ġs orce
ĠProcess or
ut on
S ony
Ġph on
Ġr aced
ĠAnth rop
Ġday time
ĠEx ercise
Add ing
Ġeng ages
ĠQual comm
Ġmir acles
Ġmem es
ĠDr ink
ĠOri oles
Ġhair s
ĠPol ar
ath om
Ġsl ippery
ĠR emy
Ġcar amel
ĠY EAR
Ġal k
I gn
a ution
ĠMer lin
ĠC ran
Ġap ologies
Ġ4 10
Ġout ing
ĠMem ories
app ointed
Ġcount ered
u ld
pos ing
Ġfire wall
ĠW ast
ĠW et
work ed
se ller
Ġrepe aled
ere o
ass uming
BL IC
m ite
ĠCEO s
ĠChap el
ellig ent
________________ ________
D og
Ġw art
Ġsubsc riber
s ports
Ġbe gged
ĠM V
Ġsem if
eth ical
Ġpre ach
Ġrev ital
Ġpun itive
Ġshort cuts
Ġinstit uted
ĠWars aw
Ġabdom en
ĠK ING
Ġsuper intendent
Ġf ry
ĠGe o
T OR
Ġcontrad ictions
apt ic
Ġlandsc apes
b ugs
Ġcl ust
Ġvol ley
c ribed
Ġt andem
Ġrob es
WH AT
Ġpromot er
Ġel oqu
review ed
ĠD K
ĠPl ato
Ġf ps
T ank
ĠDer rick
Ġpriorit ize
as per
ĠHond uras
ĠCom pleted
ne c
Ġm og
n ir
ĠMay o
DE F
st all
in ness
ĠVolks wagen
Ġprec aution
ĠM ell
i ak
ist ries
Ġ24 8
Ġoverl apping
Sen ate
ĠEnh ance
res y
rac ial
OR TS
ĠM ormons
Str ong
ĠCo ch
Mex ico
ĠMad uro
Ġj ars
Ġcan e
W ik
oll a
iff erence
Ġphysic ist
ĠMag gie
Ġ28 5
Ġdep iction
ĠMcL aren
J u
Ġsl ows
Ġcommission ers
ĠWill ow
ĠExpl os
hov ah
Ġtechn ician
Ġhom icides
ĠFl av
ĠTr uman
Ġ100 00
u ctor
Ġsh ader
News letter
45 7
Ġre ver
Ġhard ened
Ġwhere abouts
Ġrede velop
Ġcar bs
Ġtra vers
Ġsqu irrel
Ġfoll ower
Ġs ings
50 8
Ġrabb its
emon ium
Ġdocument ing
Ġmisunder stood
) '
R ick
gg ies
Ġprem ie
Ġsk ating
Ġpass ports
Ġf ists
aged don
H aw
AC P
0 80
ĠThough ts
ĠCarl son
Ġpriest hood
h ua
Ġdun geons
ĠLo ans
Ġant is
Ġfamiliar ity
ĠS abb
op al
ĠIn k
st rike
Ġc ram
Ġlegal ized
Ġcu isine
Ġfib re
Tra vel
ĠMon ument
OD Y
eth y
Ġinter state
ĠP UR
em porary
ĠArab ian
develop ed
Ġsadd le
Ġg ithub
ĠOff er
ĠIS P
ro let
ĠSUP ER
ĠDen is
Ġmultipl ier
Ġstir red
Interest ingly
Ġcustom ary
Ġbill ed
he x
Ġmultipl ied
Ġfl ipping
ĠCros by
Ġfundament als
ia e
ĠPlay ed
ĠAt om
am azon
ĠFl am
ee z
activ ated
Ġtables poon
Ġliberal ism
ĠPal in
ĠP atel
N um
ĠT AM
Ġs urn
ĠRel oaded
Ġco ined
" ],
ĠCl ash
ĠAg u
Ġprag matic
ĠActiv ate
Ġ8 02
Ġtrail ers
Ġsil hou
Ġprob es
Ġcirc us
ĠB ain
ĠLind say
ĠAb bey
Del ivery
Ġconcess ion
Ġgast ro
ĠSpr ite
Ä Ł
and el
Ġg imm
Ġaut obi
ĠT urtle
Ġwonder fully
ĠHar am
ĠWorld wide
ĠHand le
Ġtheor ists
Ġsle ek
ĠZh u
ograph ically
EG A
ĠOwn ers
ath s
ĠAntar ctic
n atal
=" "
fl ags
`` ``
Ġs ul
K h
Ġpot assium
Ġlinem an
Ġcere al
ĠSe asons
Ġ20 22
Ġmat hematic
Ġastron omers
prof essional
Ġf ares
cknow led
Ġch i
Ġyoung sters
Ġmistaken ly
Ġhem isphere
ĠDiv inity
r one
Ġ" ,
r ings
Ġattract s
v ana
å ¹
C AP
Ġplay list
Ġpor ch
ãģ £
Ġincorpor ates
Ġso ak
Ġassert ing
ĠTerror ism
ĠP ablo
J a
ces ter
Ġfear ing
ĠPr ayer
Ġescal ated
G W
Ġro be
ĠBright on
ac ists
ĠSym phony
ĠDwar f
ĠPar ade
ĠLe go
Ġinex pl
Ġl ords
le af
RA G
l iber
Ġcig ars
ĠJe hovah
60 6
WIND OWS
ĠLiber ia
eb us
He avy
Ġl ubric
ĠR W
angu ages
Ġnarrow ed
com puter
ĠE mber
Ġmurder ing
Ġdown stream
ĠT uls
ĠT ables
Top ic
ĠAcc uracy
= /
l ost
ĠRe i
Ġprogress es
b ear
Ġestablish ments
Just in
ĠPe ach
ĠG omez
å ¿
ĠTri angle
Id ent
ĠH ive
Res ources
Ġmix es
ĠAss uming
M u
Ġhyp oc
Ġs ane
ĠW an
id ious
Su ccess
Ġ io
Ang el
Ġdanger ously
ĠCreat ure
W ORK
: [
ĠKat rina
List ener
M iller
ĠId lib
h ang
Ġcircum vent
h ref
Ġcel estial
ĠWe eks
ĠP ug
ĠDal ton
Ġsubpoen a
uk u
Ġpers isted
pe i
old ing
ĠDoc uments
ĠH ast
ĠC ENT
Ġprim er
Ġsyn onymous
Ġn ib
om bs
Ġnot ation
ĠD ish
ĠAt mosp
Ġforb id
ĠAN G
pat tern
l os
Ġproject iles
b rown
." ,
ĠVen om
Ġfierce ly
ub lished
ĠU ran
ĠNic arag
4 10
ĠC AL
OT OS
ĠMir acle
ĠEn chant
Ġguard ing
app end
Att ach
Ġlevel ed
Ġcond oms
ih ilation
64 9
Ġnight mares
ĠTHE Y
ĠST ART
ĠK inn
Ġroomm ate
Ġhy giene
o pping
J ob
Ġl vl
ĠV ER
ĠKe eping
ab etic
Ġformat ting
eral a
Ġrev isions
Ġres urg
T el
ĠGood man
35 3
p od
Ġind isp
ĠTrans lation
Ġg own
ĠM und
Ġc is
Ġby stand
col lect
ĠPun jab
act ively
ĠG amb
te ll
Ġimport ing
g encies
Ġloc om
ĠBr ill
H oly
ĠBer ger
Ġshow down
Ġrespond ers
IL Y
Ġt akedown
le ted
Ġmat tered
Ġpredict ive
Ġover lay
G PU
ĠV ick
Ġconvey ed
T ab
pe er
Sc an
Ġdefensive ly
v ae
Ġappro ving
Ġt iers
ĠV ia
quer ade
ĠSaud is
Ġdemol ished
ĠProp he
Ġmon o
Ġhospital ity
H AM
ĠAri el
M OD
ĠTor ah
Ġbl ah
ĠBel arus
erent ial
ĠT uc
Ġbank er
39 7
Ġmosqu it
ĠScient ist
ĠMus ical
Ġh ust
Sh ift
Ġtor ment
Ġstand off
E duc
ĠF og
Ġampl ifier
Sh ape
Inst ance
ĠCrit ics
Ġda emon
H ouston
Ġmatt ress
ĠID F
Ġobsc ene
ĠA mer
hett i
Ġcomp iling
35 2
vere tt
ĠRed uction
ist ration
ĠBl essed
ĠB achelor
3 16
Ġpr ank
ĠVul can
dd ing
Ġm ourning
ĠQu int
ĠBl aster
test ing
Ġsed iment
>> >
ĠE ternity
ĠWH ERE
ĠM aze
Ġreact ing
ĠAl v
oms day
ĠC RA
Ġtransl ator
Ġbog us
at u
We bsite
oll s
Ġbapt ism
Ġs ibling
ĠAut umn
ve z
ãģ® é
gu ards
Ge org
assad ors
ĠFre ud
Ġcontin ents
ĠReg istry
Bern ie
ĸļ å£«
Ġtoler ant
ĠU W
Ġhor ribly
99 5
ĠMID I
Ġimpat ient
oc ado
er i
ĠWor st
ĠNor ris
ĠTalk ing
Ġdef ends
ens able
Ġ20 21
Ġanat omy
L ew
Ġdraw er
ĠCan berra
Ġpatri otic
é¾įå ĸļå£«
ĠAv g
AR M
Ġundis closed
Ġfare well
45 9
b able
ĠAll ison
OL OG
Ġcon co
t ight
ĠAC PI
ĠM ines
l ich
ĠâĶ ľ
represent ed
200 000
Ġenthusi ast
OT S
b il
ĠIng redients
Ġinvent or
ĠMy SQL
ÂłÂł Âł
ĠAB OUT
with in
Ġm k
B ul
ĠF ake
Ġdracon ian
W a
hel m
ĠTer ran
erv ille
Ġcommon place
SI ZE
Ġ" <
re place
ograph s
ĠSE LECT
inc ible
ĠMost ly
ĠShe ffield
ĠID E
ugg le
Ġcit ations
h urst
ĠUn ix
Ġunle ash
ĠP iper
ĠN ano
Ġsucc umb
Ġreluct ance
Ġ25 00
ĠMer chant
Ġwire t
Ġcomb os
ĠBirth day
Ġchar coal
ĠU PS
ĠFair fax
Ġdrive way
ĠT ek
ĠP itch
ove re
Ġtechn icians
ĠAct ual
fl ation
ĠF iscal
ĠEm pty
an amo
Ġmag nesium
Ġsl ut
Ġgrow ers
Invest igators
( ):
ĠS atellite
ĠKe ynes
miss ive
l ane
Ġb orough
3 44
ĠTE AM
ĠBet hesda
C V
h ower
ĠR AD
Ġch ant
ĠR iy
Ġcompos itions
Ġmild ly
Ġmedd ling
Ġag ility
ane ers
5 01
Ġsyn th
ling er
29 1
Ġex claimed
Part y
Ġcont amin
ĠMan or
ĠResp ond
Ġpra ising
Ġman ners
fle et
Sum mer
ĠLy nd
ĠDef initely
gr im
Ġbow ling
st ri
ç Ľ
y nt
Ġmand ates
D IV
Ġreconc ile
view s
ĠDam on
vet te
F lo
ĠGreat est
il on
ic ia
Ġportray al
Ġcush ion
50 4
19 79
oss al
App lic
sc ription
Ġmit igation
AT S
p ac
Ġer ased
Ġdefic iencies
ĠHolland e
ĠX u
Ġb red
Ġpregn ancies
f emin
Ġem ph
Ġpl anners
Ġout per
utter ing
Ġperpet rator
Ġm otto
ĠEll ison
ĠNE VER
Ġadmitted ly
AR I
ĠAzerbai jan
Ġmill isec
Ġcombust ion
ĠBott le
ĠL und
ĠP s
ĠD ress
Ġfabric ated
Ġbat tered
Ġs idel
ĠNot ting
Fore ign
ĠJer ome
0 20
ĠAr bit
Ġkn ots
ĠR IGHT
M oving
ãģ Ļ
Ġsur geries
Ġcour thouse
Ġm astered
Ġhover ing
ĠBr an
ĠAl ison
Ġsaf est
m ilitary
Ġbull ied
Ġbar rage
Read er
ES E
ĠGe ographic
T ools
3 14
ĠGe ek
ro th
gl ers
ĠF IN
Ï ģ
ĠA ston
al tern
48 8
Ġveter in
G amer
Ġint el
ren ches
Sh ield
Ġam nesty
ĠB har
Ġp iled
Ġhonor able
ĠInst itutes
Ġso aked
Ġcom a
ĠE FF
34 1
by tes
ĠG mail
le in
ĠCanad iens
m aterial
I l
Ġinstruct ors
ĠK Y
Ġconce ive
ub b
ĠP ossible
Ġeas ing
ĠChrist ina
Ġcar ic
ĠHD R
R OM
Ġsho vel
de lete
Ġp uff
ĠCh anging
Ġseam lessly
Att ribute
Ġacqu isitions
ak ery
ĠE F
Ġaut istic
ĠT akes
ĠPow der
ĠSt ir
5 10
ĠBub ble
sett ings
ĠF owler
Ġmust ard
Ġmore over
Ġcopyright ed
ĠLED s
15 00
æ ī
ĠH IS
en f
Ġcust od
ĠH uck
G i
Ġim g
An swer
C t
j ay
ĠInf rastructure
Ġfeder ally
L oc
Ġmicro bes
Ġover run
dd s
ot ent
adi ator
>>>> >>>>
Ġtorn ado
Ġadj ud
Ġintrig ued
Ġs i
ĠRevel ation
pro gress
Ġburgl ary
ĠSai yan
ĠK athy
Ġser pent
ĠAndre as
Ġcomp el
ess ler
ĠPl astic
ĠAd vent
ĠPos itive
ĠQ t
ĠHind us
reg istered
ular ity
Ġrighteous ness
Ġdemon ic
u itive
ĠB DS
ĠGre gg
c ia
ĠCrus ade
ĠSina i
W ARE
+ (
Ġme ll
Ġder ail
y ards
A st
Ġnotice ably
ĠO ber
R am
Ġun noticed
Ġse q
av age
T s
Ġ6 40
Ġconced e
Ġ] )
F ill
Ġcapt ivity
ĠImprove ment
ĠCrus ader
ara oh
M AP
æ Ĺ
Ġstr ide
al ways
F ly
N it
Ġal gae
ĠCook ing
ĠDo ors
Mal ley
Ġpolic emen
ãģ į
Ġastron aut
access ible
49 5
ĠR AW
cl iffe
udic rous
Ġdep ended
al ach
Ġvent ures
ra ke
Ġt its
ĠH ou
Ġcond om
ormon al
Ġind ent
Ġupload ing
Foot note
Import ant
Ġ27 1
Ġmind ful
Ġcont ends
C ra
Ġcal ibr
ĠO ECD
plug in
F at
ĠIS S
ĠDynam ics
ans en
68 6
' ),
Ġsp rite
Ġhand held
ĠH ipp
=~ =~
Tr ust
Ġsem antics
ĠBund es
ĠRen o
ĠLiter ature
s ense
G ary
ĠA eg
ĠTr in
EE K
Ġcler ic
ĠSS H
Ġch rist
Ġinv ading
ib u
Ġen um
aur a
Ġal lege
ĠInc redible
B BC
Ġth ru
Ġsa iled
Ġem ulate
Ġin security
Ġc rou
Ġaccommod ations
Ġincompet ent
Ġsl ips
ĠEarth qu
s ama
IL LE
Ġi Phones
as aki
Ġby e
Ġar d
Ġext ras
Ġsl aughtered
Ġcrowd funding
res so
Ġfil ib
ĠER ROR
ĠT LS
e gg
ĠIt al
Ġen list
ĠCatal onia
ĠSc ots
Ġser geant
Ġdiss olve
N H
Ġstand ings
ri que
I Q
Ġbenef iciary
Ġaqu arium
You Tube
ĠPower Shell
Ġbright est
ĠWar rant
S old
Writ ing
Ġbegin nings
ĠRes erved
ĠLatin os
head ing
Ġ4 40
Ġrooft op
AT ING
Ġ3 90
VP N
G s
k ernel
turn ed
Ġprefer able
Ġturn overs
ĠH els
S a
ĠShin ji
ve h
ĠMOD ULE
V iol
Ġex iting
Ġj ab
ĠVan illa
Ġac ron
ĠG ap
ber n
A k
ĠMc Gu
Ġend lessly
ĠFar age
ĠNo el
V a
M K
Ġbr ute
ĠK ru
ĠES V
ĠOl ivia
âĢ ł
ĠK af
Ġtrust ing
Ġh ots
3 24
Ġmal aria
Ġj son
Ġp ounding
ort ment
Count ry
Ġpostp oned
Ġunequ iv
? ),
ĠRo oney
udd ing
ĠLe ap
ur rence
sh apeshifter
ĠH AS
os ate
Ġca vern
Ġconserv atism
ĠB AD
Ġmile age
Ġarrest ing
V aults
Ġmix er
Dem ocratic
ĠB enson
Ġauth ored
8 000
Ġpro active
ĠSpirit ual
t re
Ġincarcer ated
ĠS ort
Ġpe aked
Ġwield ing
re ciation
×Ļ ×
P atch
ĠEm my
Ġex qu
tt o
ĠRat io
ĠP icks
ĠG ry
ph ant
Ġf ret
Ġeth n
Ġarch ived
% -
c ases
ĠBl aze
Ġim b
c v
y ss
im ony
Ġcount down
Ġaw akening
ĠTunis ia
ĠRe fer
ĠM J
Ġun natural
ĠCar negie
iz en
ĠN uggets
he ss
Ġev ils
64 7
Ġintrodu ctory
l oving
ĠMcM ahon
Ġambig uity
L abel
ĠAlm ighty
Ġcolor ing
ĠCl aus
set ting
N ULL
ĠF avorite
ĠS IG
> (
ĠSh iva
ĠMay er
Ġstorm ed
ĠCo verage
we apons
igh am
Ġun answered
Ġle ve
Ġc oy
c as
b ags
as ured
Se attle
ĠSant orum
ser ious
Ġcourage ous
ĠS oup
Ġconfisc ated
Ġ// /
Ġuncon ventional
Ġmom s
ĠRohing ya
ĠOrche stra
ĠPot ion
Ġdisc redit
ĠF IL
f ixed
ĠDe er
do i
ĠDim ension
Ġbureaucr ats
et een
Ġaction Group
oh m
Ġb umps
ĠUt ility
Ġsubmar ines
ren heit
re search
ĠShap iro
Ġsket ches
Ġde ceptive
ĠV il
es ame
ĠEss entially
Ġramp age
isk y
Ġmut tered
th ritis
Ġ23 6
f et
b ars
Ġpup il
ĠTh ou
o S
s ong
Ġfract ured
Ġre vert
pict ure
Ġcrit erion
us her
Ġreperc ussions
ĠV intage
ĠSuper intendent
Offic ers
Ġflag ged
Ġbl ames
Ġin verse
ograp hers
Ġmakes hift
Ġdev oid
Ġfoss ils
ĠArist otle
ĠFund s
Ġde pleted
ĠFl u
ĠY uan
Ġw oes
Ġlip id
Ġsit u
requ isites
Ġfurn ish
ĠSam ar
Ġshame ful
Ġadverse ly
Ġad ept
Ġrem orse
Ġmurder ous
uck les
ĠE SL
Ġ3 14
s ent
Ġred ef
ĠC ache
ĠP urs
ig ans
Ġ4 60
Ġpres criptions
Ġf res
F uck
ocr ates
Tw enty
ĠWe ird
ĠT oggle
ĠC alled
itiz ens
Ġp oultry
Ġharvest ing
ãĤ¦ ãĤ¹
Bott om
Ġcaution ed
t n
39 6
ĠNik ki
Ġeval uations
Ġharass ing
Ġbind ings
ĠMon etary
Ġhit ters
Ġadvers ary
un ts
Ġset back
Ġenc rypt
ĠC ait
Ġl ows
eng es
ĠN orn
Ġbul bs
Ġbott led
ĠVoy ager
3 17
Ġsp heres
p olitics
Ġsubt ract
Ġsens ations
Ġapp alling
Ġ3 16
Ġenvironment ally
ĠST EM
Ġpub lishes
5 60
Ġdilig ence
48 4
Ġadv ises
Ġpet rol
Ġimag ining
Ġpatrol s
ĠInt eger
ĠAs hes
act us
ĠRad iant
ĠL T
it ability
ht aking
Set ting
Ġnu anced
ĠRe ef
ĠDevelop ers
N i
pie ces
99 0
Lic ense
Ġlow ers
ĠOtt oman
3 27
oo o
Ġqu itting
mark ets
Beh ind
Ġbas in
Ġdoc s
an ie
fl ash
ct l
Ġcivil ized
ĠFuk ushima
"] ,"
ĠK S
ĠHonest ly
ar at
Ġconstruct s
ĠL ans
ĠD ire
ĠLI KE
ĠTrou ble
Ġwith holding
ĠOb livion
Ġsan ity
any a
Con st
Ġgro cer
ĠC elsius
Ġrecount ed
ĠW ife
B order
ate red
h appy
Ġspo iler
Ġlog ically
H all
Ġsucceed ing
Ġpoly morph
Ġax es
ĠShot gun
ĠS lim
ĠPrin ciples
ĠL eth
art a
Ġsc or
Sc reenshot
Ġrelax ation
#$ #$
Ġdeter rent
idd y
Ġpower less
Ġles bians
Ġch ords
ĠEd ited
se lected
Ġseparat ists
000 2
Ġair space
Ġturn around
Ġc unning
P ATH
P oly
Ġbomb ed
Ġt ion
x s
Ġwith hold
Ġw aged
ĠLiber ties
Fl ag
Ġcomfort ing
45 4
ĠI ris
are rs
Ġr ag
Ġrel ocated
ĠGu arant
Ġstrateg ically
Ġgam ma
uber ty
ĠLock heed
g res
Ġgr illed
ĠLow e
st ats
ĠR ocks
Ġsens ing
Ġrent ing
ĠGe ological
Ø§ Ø
ot rop
Ġse w
Ġimproper ly
48 6
Ġâĸ ł
Ġstar ving
ĠB j
Disc ussion
3 28
ĠCom bo
ĠFix es
N AT
Ġstri ving
th ora
Ġharvest ed
ĠP ing
Ġplay ful
Ġaven ues
Ġoccup ational
Ġw akes
ĠCou rier
Ġdrum mer
ĠBrow ser
ĠH outh
it u
Ġapp arel
p aste
Ġhun ted
ĠSecond ly
l ain
X Y
ĠP IN
ic ons
Ġcock tails
Ġs izable
Ġhurd les
est inal
ĠRecre ation
Ġe co
64 8
ĠD ied
m int
Ġfinger prints
Ġdis pose
ĠBos nia
ts y
22 00
Ġins pected
ĠF ou
Ġf uss
Ġamb ush
ĠR ak
Ġmanif ested
Pro secut
Ġsuff ice
ren ces
Ġcompens ated
ĠC yrus
Ġgen us
ĠWolver ine
ĠTrend s
Ġh ikes
ĠSe en
Ġen rol
C old
Ġpol itely
ĠSl av
ĠRu pert
Ġey ewitness
ĠAl to
Ġun comp
Ġposter ior
M ust
ĠHer z
Ġprogress ively
Ġ23 4
Ġind ifference
ĠCunning ham
Ġacadem ia
Ġse wer
Ġast ounding
ĠA ES
r ather
Ġeld est
Ġclim bs
ĠAdd s
Ġout cry
Ġcont ag
ĠH ouses
Ġpe pt
ĠMel ania
interest ed
ĠU CH
ĠR oots
ĠHub bard
ĠT BD
ĠRoman ian
fil ename
St one
ĠIm pl
Ġchromos ome
C le
d x
Ġscram bled
ĠP t
Ġ24 2
OP LE
Ġtremend ously
St reet
Ġcra ving
Ġbund led
ĠR G
p ipe
Ġinj uring
Ġarc ane
Part icip
ĠHero ic
st y
Ġto pping
ĠTemp est
rent ices
b h
Ġpar anoia
ĠUnic ode
Ġegreg ious
Ġ\ '
ĠOsw ald
Ġgra vel
ĠSim psons
Ġbl and
ĠGuant anamo
Writ er
lin ers
ĠD ice
J C
Ġpar ity
Ġs ided
Ġ23 7
ĠPyr rha
at ters
d k
F ine
comp an
Ġform ulated
ĠId ol
il ers
hem oth
ĠF av
Ġintr usion
Ġcar rots
ĠL ayer
ĠH acker
Ġ ----------------
Ġmoder ation
é ģ
oc oc
Ġcharacter ize
ĠTe resa
Ġsocio economic
Ġper k
ĠParticip ation
tr aining
ĠPaul o
ph ys
Ġtrust worthy
Ġembod ied
ĠMer ch
c urrency
ĠPrior ity
Ġte asing
Ġabsor bing
Ġunf inished
ĠCompar ison
Ġdis ple
writ ers
Ġprofess ions
ĠPengu in
Ġang rily
ĠL INK
68 8
ĠCor respond
Ġprev ailed
Ġcart el
l p
as ms
ĠRed emption
ĠIslam ists
effect s
d ose
ĠL atter
ĠHal ifax
Ġv as
ĠTop ics
ĠN amed
advert ising
zz a
IC ES
Ġret arded
ach able
ĠPupp et
ĠItem Level
Ġret ract
Ġident ifiable
A aron
ĠB uster
s ol
hel le
as semb
H ope
r anged
B a
ĠP urch
é Ģ
ĠSir i
Ġarri vals
Ġ19 12
Ġshort ened
Ġ3 12
Ġdiscrep ancy
ĠTem perature
ĠWal ton
Ġkind erg
p olit
Ġrem ix
Ġconnect ors
ãĥĺ ãĥ©
ĠKazakh stan
dom inated
Ġsu gars
im ble
ĠPan ic
ĠDem and
ĠCol ony
on en
ĠM ER
7 75
ur ia
aza ar
ĠDeg ree
P ri
Ġsun shine
Ġ25 1
Ġpsychedel ic
Ġdigit ally
ĠBra un
Ġsh immer
Ġsh ave
ĠTel esc
ĠAst ral
ĠVenezuel an
ĠO G
Ġc rawling
Int eg
ĠFe ather
Ġunfold ing
Ġappropri ation
Ġè£ı è
ĠMob ility
ĠN ey
- .
b ilt
L IN
ĠT ube
ĠCon versely
Ġkey boards
ĠC ao
Ġover th
Ġla ure
>> \
ĠV iper
ach a
Off set
ĠR aleigh
ĠJ ae
J ordan
j p
Ġtotal itarian
Connect or
Ġobserv es
ĠSpart an
ĠIm mediately
ĠSc al
C ool
Ġt aps
Ġro ar
P ast
Ġch ars
ĠB ender
ĠShe ldon
Ġpain ter
Ġbe acon
ĠCreat ures
Ġdownt urn
Ġh inder
ĠAnd romeda
Ã Ľ
cc oli
ĠF itness
et rical
Ġutil izes
Ġsen ate
Ġen semble
Ġche ers
T W
Ġaff luent
k il
ry lic
ord ering
Com puter
Ġgru esome
ost ics
ĠUb isoft
ĠKel ley
Ġw rench
Ġbourgeois ie
IB LE
ĠPrest on
w orn
ar ist
reat ing
Ġst ained
ar ine
Ġsl ime
EN N
Ġche sts
Ġground water
ann ot
ĠTr ay
ĠLoc ke
ĠC TR
Ġd udes
ĠEx ternal
ĠDec oder
Ġpar amed
ĠMed line
80 9
ĠD inner
rup al
g z
ĠG um
ĠDem o
j ee
Ġd h
ber man
arch s
Ġen qu
ĠEp stein
Ġdevast ation
Ġfriends hips
ĠAr d
Ġ23 1
ĠRub in
ĠDist ance
Ġsp urred
Ġd ossier
Ġover looking
\\\\\\\\ \\\\\\\\
Fore st
ĠCom es
\ ",
ĠIran ians
Ġf ixtures
L aughs
Ġcur ry
ĠKing ston
Ġsqu ash
Ġcat alogue
Ġabnormal ities
Ġdigest ive
.... .....
Ġsubord inate
og ly
Ġ24 9
M iddle
Ġmass ac
Ġburg ers
Ġdown stairs
Ġ19 31
39 4
ĠV G
Ġl asers
ĠS ikh
ĠAlex a
der ived
Ġcycl ist
ãģ® éŃĶ
onel iness
!!!! !!!!
Ġbuff s
leg ate
Ġrap ing
Ġrecomm ending
ro red
Ġmult icultural
un ique
Ġbusiness men
Ġune asy
ĠM AP
Ġdisp ersed
cipl ine
J ess
ĠK erala
å §
Ġabst raction
Sur v
U h
Ġprin ters
ij a
ow der
Ġanalog ous
ĠA SP
af er
Ġunfold ed
Ġlevel ing
Ġbre ached
ĠH earing
Ġn at
Ġtransl ating
crit ical
Ġant agonist
ĠYes terday
Ġfuzz y
w ash
m ere
Ġbe wild
ĠM ae
V irgin
ph rase
Ġsign aled
ĠH IGH
Ġprot ester
Ġgar ner
unk nown
Ġk ay
Ġabduct ed
Ġst alking
am n
Ġdes erving
ĠR iv
ĠJ orge
Ġscratch ing
ĠS aving
ip ing
Ġte ase
Ġmission ary
ĠMor row
T IME
P resent
Ġchem otherapy
tern ess
ĠH omes
ĠP urdue
Ġst aunch
ĠWhit ney
ĠTH ERE
Î ¼
iat us
ĠErn est
ĠDe ploy
Ġcove ted
F ML
ĠDial ogue
Ġex ited
f ruit
Ġner d
":" ","
Ġv ivo
ru ly
4 60
ĠAm en
rehens ible
Ġâ ĺ
D IR
Ġad herence
Ġche w
ĠCo ke
ĠSerge i
dig ital
ĠNe ck
g ently
enth al
/ )
Ġwe ary
Ġgu ise
ĠConc ord
ĠOn ion
at cher
Ġb inge
ĠDirect ive
Ġman ned
ans k
Ġill usions
Ġbillion aires
38 3
oly n
odynam ic
ĠWhe at
ĠA lic
Ġcol oured
ĠN AFTA
ab o
Ġmac ros
ind ependent
s weet
Ġsp ac
ĠK abul
Ġ Ä
em e
Ġdict ated
Ġsh outs
= {
Ġr ipping
ĠSh ay
ĠCr icket
direct ed
Ġanalys ed
ĠWAR RANT
ag ons
ĠBlaz ers
Ġche ered
Ġar ithmetic
ĠTan z
37 3
ĠFl ags
Ġ29 5
Ġw itches
ĠIn cluded
ĠG ained
ĠBl ades
G am
ĠSam antha
ĠAtl antis
ĠPr att
Ġspo iled
ĠI B
ĠRam irez
Pro bably
re ro
ĠN g
ĠWar lock
t p
Ġover he
Ġadministr ations
Ġt int
Ġreg iment
Ġpist ols
Ġblank ets
Ġep ist
Ġbowl s
Ġhydra ulic
Ġde an
Ġj ung
Ġasc end
70 5
ĠSant iago
Ã ®
Ġun avoid
ĠSh aman
re b
Ġstem ming
99 8
ĠM G
st icks
esthes ia
ER O
Ġmor bid
ĠGr ill
ĠP oe
any l
Ġdele ting
ĠSurve illance
Ġdirect ives
Ġiter ations
ĠR ox
ĠMil ky
F ather
Ġpat ented
44 7
Ġprec ursor
Ġm aiden
ĠP hen
ĠVe gan
ĠPat ent
K elly
Redd itor
Ġn ods
Ġvent ilation
ĠSchwar z
Ġw izards
Ġomin ous
ĠHe ads
ĠB G
Ġl umber
ĠSp iel
Ġis Enabled
Ġancest ral
ĠSh ips
Ġwrest ler
ph i
Ġy uan
ĠRebell ion
Ġice berg
Ġmag ically
Ġdivers ion
ar ro
yth m
ĠR iders
ĠRob bie
ĠK ara
ĠMain tenance
ĠHer b
Ġhar ms
p acked
ĠFe instein
Ġmarry ing
Ġbl ending
ĠR ates
Ġ18 80
Ġwr ink
ĠUn ch
ĠTor ch
desc ribed
Ġhuman oid
ilit ating
ĠCon v
ĠFe ld
IGH TS
Ġwhistlebl ower
ort mund
ets y
arre tt
ĠMon o
ĠI ke
ĠC NBC
ĠW AY
ĠMD MA
ĠIndividual s
Ġsupplement al
Ġpower house
ĠSt ru
F ocus
aph ael
ĠCol leg
att i
Z A
Ġp erenn
ĠSign ature
ĠRod ney
Ġcub es
idd led
ĠD ante
ĠIN V
iling ual
ĠC th
Ġso fa
Ġintimid ate
ĠR oe
ĠDi plom
ĠCount ries
ays on
Ġextrad ition
Ġdis abling
ĠCard iff
Ġmemor andum
ĠTr ace
Ġ?? ?
se ctor
ĠRou hani
ĠY ates
ĠFree ze
Ġbl adder
M otor
ĠProm ise
ant asy
Ġforesee able
ĠC ologne
cont ainer
ĠTre es
ĠG ors
ĠSin clair
Ġbar ring
key e
Ġsl ashed
ĠStat istical
é ĩ
Ġâĸ º
All ows
Ġhum ility
Ġdr illed
ĠF urn
44 3
Ġse wage
Ġhome page
Ġcour tyard
Ġv ile
Ġsubsid iaries
aj o
direct ory
Ġam mon
V ers
charg es
Ġ} }
ĠCh ains
Ġ24 6
n ob
Ġper cept
Ġg rit
Ġfisher men
ĠIraq is
ĠDIS TR
ĠF ULL
ĠEval uation
g raph
at ial
Ġcooper ating
Ġmel an
Ġenlight ened
Ġal i
t ailed
Ġsal ute
Ġweak est
ĠBull dogs
U A
ĠAll oy
Ġsem en
oc ene
ĠWilliam son
s pr
, âĢĶ
ĠG F
itt ens
Be at
ĠJ unk
iph ate
ĠFarm ers
ĠBit coins
ig ers
d h
ĠL oyal
p ayer
Ġentert ained
Ġpenn ed
Ġcoup on
Que ue
Ġweaken ing
c arry
Ġunderest imate
Ġshoot out
Ġcharism atic
ĠProced ure
Ġprud ent
in ances
Ġric hes
Ġcort ical
Ġstr ides
Ġd rib
ĠOil ers
5 40
ĠPer form
ĠBang kok
Ġe uth
S ER
Ġsimpl istic
t ops
camp aign
Q uality
Ġimpover ished
ĠEisen hower
Ġaug ment
ĠH arden
Ġinterven ed
Ġlist ens
ĠK ok
Ġs age
Ġrub bish
ĠD ed
Ġm ull
pe lling
Ġvide ot
Produ ction
D J
m iah
Ġadapt ations
Ġmed ically
Ġboard ed
Ġarrog ance
Ġscra pped
Ġopp ress
FORM ATION
Ġj unction
4 15
EE EE
S kill
Ġsub du
ĠSug gest
ĠP ett
Ġle tt
ĠMan ip
ĠC af
ĠCooper ation
T her
Ġreg ained
¶ æ
ref lect
Ġth ugs
ĠShel by
Ġdict ates
ĠWe iner
ĠH ale
Ġbatt leground
s child
Ġcond ol
h unt
osit ories
Ġacc uses
Fil ename
Ġsh ri
Ġmotiv ate
Ġreflect ions
N ull
ĠL obby
¥ µ
ĠS ATA
ĠBack up
Ñ ĥ
n in
ĠCor rection
Ġju icy
ut ra
ĠP ric
Ġrest raining
ĠAir bnb
ĠAr rest
Ġappropri ations
Ġsl opes
Ġmans laughter
Ġwork ings
ĠH uss
ĠF rey
Le ave
ĠHarm ony
ĠF eder
Ġ4 30
Ġt rench
Ġglad ly
Ġbull pen
ĠG au
b ones
Ġgro ove
Ġpre text
ã ħĭ
Ġtransm itter
ĠComp onent
Ġunder age
ĠEm pires
T ile
Ġo y
ĠMar vin
ĠC AS
Ġbl oss
Ġrepl icated
ĠMar iners
Marc us
ĠBl ocks
Ġliber ated
Ġbutter fly
Fe el
Ġfer mentation
Ġyou tube
Ġoff end
ĠTer m
res ist
Ġcess ation
Ġinsurg ency
Ġb ir
ĠRa ise
59 5
Ġhypothes es
50 2
Ġpl aque
ocr at
Ġjack ets
ĠHuff Post
am ong
Ġconf er
48 7
ĠL illy
Ġadapt ing
ĠF ay
Ġsh oved
ve c
Ġref ine
Ġg on
Ġgun men
z ai
ĠShut tle
ĠI zan
Ġ19 13
Ġple thora
Â· Â·
Ġ5 10
Ġp uberty
Ġ24 1
ĠWe alth
ĠAl ma
ĠM EM
ĠAd ults
C as
pr ison
R ace
Ġwater proof
Ġathlet icism
Ġcapital ize
ĠJu ice
Ġillum inated
ĠP ascal
Ġirrit ation
ĠWitness es
ad le
ĠAst ro
Ġf ax
ĠEl vis
Prim ary
ĠL ich
ĠEl ves
Ġres iding
Ġst umble
3 19
ĠP KK
Ġadvers aries
D OS
ĠR itual
Ġsm ear
Ġar son
ident al
Ġsc ant
Ġmon archy
Ġhal ftime
Ġresid ue
Ġind ign
ĠSh aun
ĠEl m
aur i
A ff
W ATCH
ĠLy on
hel ps
36 1
Ġlobby ist
Ġdimin ishing
Ġout breaks
Ġgo ats
f avorite
ĠN ah
son ian
ĠBo oster
Ġsand box
ĠF are
ĠMalt a
Ġatt Rot
ĠM OR
ld e
Ġnavig ating
T ouch
Ġunt rue
ĠDis aster
Ġl udicrous
Pass word
ĠJ FK
blog spot
4 16
ĠUN DER
ern al
Ġdelay ing
T OP
Ġimpl ants
ĠAV G
ĠH uge
att r
Ġjournal istic
ĠPe yton
ĠI A
R ap
go al
ĠProgram me
Ġsm ashing
w ives
print ln
ĠPl ague
in us
EE P
Ġcru iser
ĠPar ish
umin ium
Ġoccup ants
ĠJ ihad
m op
Ġp int
Ġhe ct
ĠMe cca
direct or
ĠFund ing
ĠM ixed
Ġst ag
T ier
Ġg ust
Ġbright ly
ors i
Ġup hill
R D
Ġles ions
ĠBund y
liv ious
Ġbi ologist
ĠFac ulty
ĠAuthor ization
Ġ24 4
All ow
ï ¸
ĠGi ul
Ġpert inent
ot aur
es se
ĠRo of
Ġunman ned
35 1
ĠSh ak
ĠO rient
Ġend anger
D ir
Ġrepl en
ed ient
Ġtail or
Ġgad gets
Ġaud ible
âĺ Ĩ
N ice
Ġbomb ard
ĠR ape
Ġdef iance
ĠTW O
ĠFilip ino
Ġunaff ected
erv atives
Ġso ared
ĠBol ton
Ġcomprom ising
ĠBrew ers
R AL
ĠA HL
icy cle
Ġv ampires
Ġdi pped
oy er
ĠX III
Ġsidew ays
ĠW aste
ĠD iss
ĠâĶľ âĶĢâĶĢ
$ .
Ġhabit ats
ĠBe ef
tr uth
tr ained
spl it
R us
And y
ĠB ram
RE P
p id
è£ ħ
ĠMut ant
An im
ĠMar ina
Ġfut ile
hig hest
f requency
Ġepile psy
Ġcop ing
Ġconc ise
Ġtr acing
ĠS UN
pan el
ĠSoph ie
ĠCrow ley
ĠAd olf
ĠShoot er
Ġsh aky
ĠI G
ĠL ies
ĠBar ber
p kg
Ġupt ake
Ġpred atory
UL TS
/ **
Ġintox icated
ĠWest brook
od der
he ment
Ġbas eman
AP D
st orage
ĠFif ty
ed itor
G EN
UT ION
ir ting
Ġse wing
r ift
Ġag ony
ĠS ands
Ġ25 4
C ash
Ġl odge
Ġp unt
N atural
ĠIde as
Ġerrone ous
ĠSens or
ĠHann ity
Ġ19 21
Ġm ould
ĠG on
kay a
Ġanonym ously
ĠK EY
Ġsim ulator
W inter
Ġstream ed
50 7
? ",
Ġte ased
Ġco efficient
Ġwart ime
ĠTH R
' '.
ĠBank ing
mp ire
Ġf andom
Ġl ia
G a
Ġdown hill
Ġinterpre ting
Ind ividual
N orm
Ġjealous y
bit coin
Ġple asures
ĠToy s
ĠChev rolet
ĠAd visor
IZ E
Ġrecept ions
70 6
C ro
Ġ26 2
Ġcit rus
ir u
Review er
ject ed
U ES
an z
19 81
ĠWork er
Ġcompl ied
ores cent
contin ental
T on
ĠPr ism
ĠShe ep
Ġ28 8
n ox
ĠV og
O rd
Ġreal ms
te k
Ġirrig ation
Ġbicy cles
Ġelectron ically
p oly
t all
() );
Ġaest hetics
ĠInteg rated
Expl ore
Ġd unk
47 6
p ain
ĠJac ques
ĠD mit
Fram es
Ġreun ited
Ġhum id
D ro
P olitical
Ġyouth ful
Ġent ails
Ġmosqu ito
36 3
spe cies
Ġcoord inating
ĠMay hem
ĠMagn us
M ount
Impro ved
ĠST ATE
ATT LE
Ġflow ed
Ġtack led
Ġfashion ed
Ġre organ
iv ari
f inger
Ġreluct antly
et ting
ĠV and
you ng
ĠGar land
Ġpresum ption
Ġamen ities
ĠPle asant
on ential
ĠO xy
Ġmor als
ĠY ah
Read y
Sim on
En h
D emon
Ġcl ich
Mon itor
ĠD U
Ġwel comes
Ġstand out
Ġdread ful
Ġban anas
Ġball oons
h ooting
bas ic
Ġsuff ix
Ġd uly
can o
Ch ain
at os
Ġgeop olitical
Ġ( &
ĠGem ini
ÃĥÃĤÃĥÃĤÃĥÃĤÃĥÃĤÃĥÃĤÃĥÃĤÃĥÃĤÃĥÃĤÃĥÃĤÃĥÃĤÃĥÃĤÃĥÃĤÃĥÃĤÃĥÃĤÃĥÃĤÃĥÃĤ ÃĥÃĤÃĥÃĤÃĥÃĤÃĥÃĤÃĥÃĤÃĥÃĤÃĥÃĤÃĥÃĤÃĥÃĤÃĥÃĤÃĥÃĤÃĥÃĤÃĥÃĤÃĥÃĤÃĥÃĤÃĥÃĤ
Ġacqu itted
L uck
prot ect
10 24
Ġsc arcity
Ġmind fulness
ec ided
D N
pr ime
ĠPres idents
ĠVID EO
Ġ( âĪĴ
add ock
N OR
ĠP ru
p un
ĠL OL
)) ))
ĠL iqu
ĠS AS
Ġsty ling
Ġpunish ments
Ġnum b
Ġasc ertain
ĠRock ies
f lu
Th umbnail
Ġperpet rated
ĠSem i
Ġdis arm
ĠOld er
ĠEx ception
Ġexponent ially
ĠCommun ities
Ġabol ish
ĠPart ner
pt oms
Ġ7 77
ĠFo ley
ĠC ases
Ġgre ase
ĠReb irth
G round
Ġ; )
ĠDoct rine
ik ini
Y e
ĠBl ossom
Ġpers ists
b ill
Ġinf usion
Ġbud dies
9 11
ĠPat ient
Ġdem os
Ġacquaint ance
ĠP aw
at ari
Ġx ml
Ġfasc ination
ĠSer ve
Ï Ĥ
br anded
Ġa z
Return s
Ġover shadow
Ġro am
Ġspeed y
n umbered
hel ial
Ġdisc iple
Ġass urances
g iven
pect ing
ĠN atalie
çĶ °
Ġmosquit oes
rote in
Ġnumer ic
Ġindepend ents
Ġtrans itional
Ġreaction ary
ĠMech dragon
do ctor
Ġshort est
Ġsequ ential
ĠB ac
ĠAccount s
ãģ Į
ach y
ract ive
ĠReg iment
Ġbreat htaking
ffic iency
ĠB ates
Ġ3 11
Ġward robe
ft s
ĠBer k
Sim ply
ĠRivers ide
iver ing
ident ial
lu cent
Ġen riched
ĠCon ver
ĠG iving
ãĥ Ļ
Ġlegal ize
ĠF TC
Ġfre aking
M ix
Ġter restrial
es ian
ci ents
W ing
LO AD
Ġled ge
ĠViol ent
ĠMet all
Ġ30 8
Ġs outheastern
hett o
M eat
Ġslow down
Ġret reated
Jere my
end as
**** *
er ic
Ġre ins
opp able
ĠHuman ity
ear ances
rig an
C amera
Ġwa ivers
s oc
Ġalter ation
trans form
ĠC emetery
50 6
Ġindef inite
Ġstim ulating
y g
60 3
ĠS op
Ġdescript ive
Ph ase
ĠEd mund
Ġpneum onia
vent us
A mb
Ġlabor atories
ĠEx clusive
ug ar
W ere
Ġmalf unction
Ġhomosexual s
Ġ---- ---
un i
Ġturb ines
ĠEqu ity
D u
Ġmind ed
ĠR H
ĠBlack hawks
Ġfe ats
Ġ17 00
re pl
36 2
lad en
Ġindisp ensable
ly ss
tt i
Ġre el
Ġdiver ted
Ġlik eness
Ġsubscript ions
Ġfing ert
Ġfil thy
dest ruct
d raft
ĠBernard ino
l aunch
Ġper plex
ĠS UM
car b
Ġswe ater
ĠVent ure
ĠJ ag
ĠCele b
ĠV oters
Ġstead fast
Ġathlet ics
ĠHans on
ĠDr ac
Tr acker
Ġcomm end
ĠPres idency
ĠD ID
in formed
Ġweb page
P retty
Ġforce fully
ãĥĥ ãĤ¯
Ġrel ocation
Ġsat ire
â ī
ĠSunder land
æ Ħ
V oice
???? ????
Ġinform ant
Ġbow el
ĠUn iform
Ġ ..."
Ġpur ge
Ġpic nic
ĠU mb
ĠU PDATE
ĠSapp hire
ĠSt all
le arn
Ġobject ively
Ġob liter
Ġlooph ole
Ġjour neys
Ġo mission
Pro s
ĠSid ney
pl oma
Ġspray ed
Ġg uru
Ġtra itor
Ġtim et
Ġsn apping
ĠSe vent
urn al
ĠUk ip
Ġb owed
por al
l iberal
R os
Quest ions
i OS
Ġsummar ize
ST AT
Ġ18 50
ap est
Ġl ender
ĠVari able
br inging
ĠL ORD
, )
Ġcollaps es
x iety
ĠN ed
Y D
ĠSch a
Ġantib ody
Ġdis band
y re
ill usion
Ġro ver
s hed
ĠHiro sh
cc i
Ġcal am
ĠMort on
P interest
Ġ19 28
ĠE uras
ord es
Ġf ences
ĠIn ventory
ĠVal encia
ĠU d
ĠT iff
Ġsqu e
Ġqu otation
Ġtroubles ome
er ker
QU EST
ĠKing doms
s outh
Ġle vy
Pr ince
ĠSt ing
Ġnick named
Ġapp e
Ġphot ographic
Ġcorp us
re ference
ĠT rog
U nt
) =(
ĠLat via
Ġactiv ating
Ġlicense e
Ġdispar ities
ĠNews letter
ãĥĥ ãĥĪ
Ġfree ing
ĠJe ep
ĠPer ception
ins k
Ġsil icone
ĠHay den
Le an
ĠSuz uki
ibr arian
66 8
Ġsp or
Ġcorrel ations
ag hetti
Ġtu ber
ĠIP CC
il us
ĠV u
Ġwealth iest
ĠCarb uncle
an za
Ġfool ed
ĠZ ur
Ġd addy
ran o
il ian
Ġknock out
f man
requ ired
ĠWik ileaks
ĠD uffy
ON T
Ġins ol
ĠObject s
Ġb ou
ĠNord ic
ĠIns ert
sc an
Ġd ancers
Ġid iots
major ity
ĠNev ille
ĠFree BSD
Ġt art
pan ic
69 0
Ġcoc oa
Ġsam pled
Ġlook up
Ind ust
Ġinject ions
gen re
Ġa u
Ġroad way
Ġgen itals
K ind
ĠEx aminer
ĠY az
F resh
Ġpar alysis
ĠAl uminum
Ġre ap
ok Ã©
Ġsl oppy
ĠTun nel
pos ium
ner y
en ic
Ġher bal
ĠOut er
ĠBuild er
Ġinc ur
Ġide ologies
Ġback ups
cons uming
ĠDet ect
de ck
ĠKN OW
ĠG ret
ĠM IC
Ġtough ness
ĠEx hibit
Ġh ive
L es
ĠSCH OOL
ĠAt ari
ald e
ĠN ull
and estine
m ouse
Ġbrig ade
48 9
Ġrev ol
ĠLaw son
ĠW ah
op oly
eb ted
ĠS aunders
Ġ3 13
ĠW inc
Ġtab oo
ĠHel met
Ġw edge
ch ip
ĠT ina
b g
Ġinf uri
r n
Ġanomal ies
ĠSy nc
ĠEx am
ĠComm it
ĠDi ary
ĠALS O
ĠDe bor
omed ical
Ġcomprehens ion
6 55
Ġempower ing
Ġ ire
Ġju ices
ĠE TH
ĠBox ing
=" /
Ġfacilit ated
p oke
ĠPars ons
ĠMod er
tra vel
Ġcivil izations
Ġliber tarians
Ġrun e
ĠCl arks
at hed
Ġcampaign ers
ĠDis patch
ĠFah renheit
ĠCap com
-------- --
Ġl ace
Ġdr aining
Ġl iner
ĠArt ificial
Ã© n
t ask
] ).
ĠGM O
ĠOper ator
ord inary
ĠInf luence
ĠU ps
Ġpot ency
uss en
osp ons
ĠSw im
ĠDead line
Un ity
Ġcul inary
Ġenlight enment
Ġwe arer
Ġmin ed
Ġp ly
Ġinc est
ĠDVD s
W alk
B TC
Tr ade
Ġdev al
ib and
ĠOvers ight
Palest inian
Ġd art
Ġm ul
L R
Ġrem ovable
ĠReal ms
ì Ŀ
Ġmisc ar
ĠV ulkan
68 5
Ã¨ re
ĠS ap
Ġmer ging
ĠCar ly
che ster
Ġbr isk
Ġlux urious
ĠGener ator
Ġbit terness
Ġed ible
Ġ24 3
T G
Ġrect angle
With No
bel ow
J enn
Ġdark est
Ġh itch
Ġdos age
Ġsc aven
ĠK eller
ĠIllust rated
Certain ly
ĠMaver icks
Marg inal
Ġdiarr hea
Ġenorm ously
Ġ9 99
sh r
qu art
Ġadam ant
ĠM ew
Ġren ovation
Ġcerv ical
ĠPercent age
en ers
ĠKim ber
Ġflo ats
Ġde x
ĠW itcher
ĠSwan sea
d m
Ġsal ty
y ellow
Ġca pe
ĠDr ain
ĠPaul a
ĠTol edo
les i
Mag azine
ĠW ick
ĠM n
ĠA ck
ĠR iding
AS ON
Ġhom ophobic
AR P
Ġwand ered
C PU
ood oo
ĠP ipe
Ġtight ening
ĠBut t
3 18
Ġdesert ed
S ession
Ġfacilit ating
J ump
Ġemer gencies
OW ER
Ġexhaust ive
ĠAF TER
Ġheart beat
ĠLab el
ack y
ĠCert ified
ilt ration
Z e
ĠU tt
Ġ13 00
Ġpres ume
ĠDis p
Ġsur ged
Ġdoll s
Col umb
Ġchim pan
ĠR azor
Ġt icks
Ġcouncill or
Ġpilgr image
ĠReb els
ĠQ C
ĠA uction
x ia
ik k
b red
Ġinsert ion
Ġco arse
d B
SE E
ĠZ ap
ĠF oo
Ġcontem por
ĠQuarter ly
ot ions
ĠAl chemist
ĠT rey
ĠDu o
S weet
80 4
ĠGi ov
Ġfun n
N in
h off
Ġram ifications
Ġ19 22
ĠExper ts
az es
Ġgar ments
ar ial
ĠN ab
Ġ25 7
ĠV ed
Ġhum orous
ĠPom pe
Ġn ylon
Ġlur king
ĠSerge y
ĠMatt is
Ġmisogyn y
ĠComp onents
ĠWatch ing
ĠF olk
ract ical
B ush
Ġt aped
Ġgroup ing
Ġbe ads
Ġ20 48
Ġcon du
quer que
Read ing
Ġgriev ances
Ult ra
Ġend point
H ig
ĠSt atic
ĠScar borough
L ua
ĠMess i
a qu
ĠPsy Net
ĠR udd
Ġa venue
v p
J er
Ġsh ady
ĠRes ist
ĠArt emis
Ġcare less
Ġbro kers
Ġtemper ament
Ġ5 20
T ags
ĠTurn ing
Ġut tered
Ġp edd
Ġimpro vised
Ġ: (
Ġtab l
Ġpl ains
16 00
press ure
ĠEss ence
marg in
friend s
ĠRest oration
Ġpoll ut
ĠPok er
ĠAugust ine
ĠC IS
ĠSE AL
or ama
Ġth wart
se ek
Ġp agan
Â º
cp u
Ġg arn
Ġass ortment
ĠI LCS
t ower
Recomm ended
Ġun born
ĠRandom Redditor
ĠRandomRedditor WithNo
Ġparaly zed
Ġeru ption
Ġinter sect
ĠSt oke
ĠS co
B ind
å ¾
ĠP NG
ĠNeg ative
ĠNO AA
Le on
Ġall oy
ĠL ama
ĠD iversity
5 75
Ġunderest imated
ĠSc or
Ġm ural
Ġb usted
so on
l if
Ġnone x
Ġall ergy
ĠUnder world
ĠR ays
ĠBl asio
Ġh rs
ĠD ir
Ġ3 27
by ter
Ġrepl acements
Ġactiv ates
ri ved
M H
Ġp ans
ĠH I
Ġlong itudinal
Ġnu isance
al er
Ġsw ell
ĠS igned
s ci
ĠIs les
ĠA GA
Ġdef iant
Ġson ic
oc on
K C
ĠA im
t ie
ah ah
Ġm L
D X
Ġb isc
ĠBill board
ĠSY STEM
NE Y
ga ard
Ġdist ressed
former ly
Al an
Ġche fs
Ġopt ics
ĠC omet
ĠAM C
Ġredes igned
irm ation
Ġsight ings
38 2
3 11
ĠW B
Ġcont raction
ĠT OTAL
D ual
Ġstart led
Ġunderstand ably
Ġsung lasses
ETH OD
Ġd ocker
Ġsurf ing
ĠH EL
ĠSl ack
ton es
Ġsh alt
Vis ual
49 8
Dep artment
c ussion
Ġunrest ricted
Ġt ad
Ġre name
employ ed
Ġeduc ating
Ġgrin ned
bed room
ĠActiv ities
ĠV elvet
ĠSW AT
Ġsh uffle
ig or
Ġsatur ation
F inding
c ream
ic ter
Ġv odka
tr acking
te c
Ġfore ground
iest a
Ġve hement
ĠEC B
ĠT ie
E y
Ġt urtles
ĠRail road
ĠKat z
ĠFram es
Ġmen ace
ĠFell owship
ĠEss ential
ugg ish
Ġdri p
ch witz
ĠKy oto
s b
ĠN ina
Param eter
Ġal arms
ĠCl aud
Ġpione ering
Ġchief ly
ĠSc ream
Col lection
Ġthank fully
ĠRonald o
åŃ Ĳ
st rip
ĠDisney land
com mercial
See ing
S oul
Ġevac uate
Ġc iv
ĠAs he
Ġdiv ides
ĠD agger
rehens ive
Ġber ries
ĠD F
Ġs ushi
Ġplur ality
W I
Ġdisadvant aged
Ġbatt alion
ob iles
45 1
Ġcl ing
Ġunden iable
ĠL ounge
Ġha unt
p he
Ġquant ify
Ġdiff ered
Ġ[* ]
ĠV iz
c um
sl ave
Ġvide og
Ġqu ar
Ġbund les
ĠAl onso
t ackle
Ġneur onal
Ġlandsl ide
conf irmed
ĠDep th
Ġrenew ables
B ear
ĠMaced onia
Ġjer seys
Ġb unk
ĠSp awn
ĠControl s
ĠBuch anan
Ġrobot ics
Ġemphas izing
ĠTut orial
h yp
ist on
Ġmonument al
æ °
ĠCar ry
Ġt bsp
en ance
H ill
art hed
Ġro tten
De an
Ġtw isting
Ġgood will
Ġimm ersion
L iving
Ġbr ushes
ĠC GI
ĠAt k
tr aditional
Ġph antom
ĠSt amina
Ġexpans ions
ĠMar in
Ġembark ed
ĠE g
int estinal
ĠPE OPLE
ĠBo oth
ĠApp alach
Ġreleg ated
V T
M IT
Ġmust er
Ġwithdraw ing
Ġmicrosc ope
ĠG athering
ĠC rescent
ĠArgent ine
ĠDec re
ĠDomin ic
Ġbud s
ant age
ĠI on
Ġwid ened
ONS ORED
ĠGl oves
iann opoulos
raz en
fe el
Ġrepay ment
Ġhind sight
ĠRE ALLY
ĠPist ol
ĠBra h
Ġwat ts
Ġsurv ives
Ġfl urry
iss y
Al ert
ĠUrug uay
Ph oenix
S low
ĠG rave
ĠF ir
Ġmanage able
Ġtar iff
ĠU DP
ĠPist ons
ĠNiger ian
Ġstrike outs
Ġcos metics
whel ming
f ab
c ape
pro xy
Ġre think
Ġover coming
sim ple
Ġw oo
Ġdistract ing
ĠSt anton
ĠTuls a
ĠD ock
65 9
Ġdisc ord
ĠEm acs
ĠV es
ĠR OB
Ġreass uring
Ġcons ortium
Muslim s
3 21
Ġprompt s
se i
ĠH itch
imp osed
ĠF ool
Ġindisc rim
wr ong
bu querque
D avis
! ]
Ġtim eless
ĠNE ED
Ġpestic ide
Ġrally ing
ĠCal der
Ġå ¤
Ġx p
ĠUn le
ĠEx port
lu aj
B uff
) </
B oot
ĠChrys ler
or ative
M ess
Ġneglig ible
ert odd
ĠMush room
ĠG ale
g c
ĠCos by
ĠR ural
rit ical
B ell
Ġturb ine
00 200000
Ġlegit imately
ĠAnim ated
T ED
ĠThe odore
c onduct
ĠH ier
Ġcounterfe it
ĠAlger ia
Ġun beat
cont roller
Ġun res
Ġscram bling
ĠFall on
T es
Ġam ber
Ġroy alties
ĠShel ter
ĠL ester
Ġclass ify
Rem ote
Ġun heard
Ġcontrovers ies
Ġenrich ment
ĠYan kee
g amer
Ġpl atinum
Ġec ology
ĠS ark
Ġunt ouched
Ġsuper visors
Ġ" %
Ġf ooth
Ġcomm ons
Ġnarc otics
Ġind ices
ĠP ly
Ġaddition ally
ĠGaw ker
ĠE Q
Pl aying
Ġcave at
ĠAbs olute
oss us
B aby
Ġr ation
Ġres in
Ġcalib ration
ĠNew port
Ġkn ocks
v t
Ġcomp ost
Sc ene
Ġsar cast
Ġkiss es
Ġn s
all i
ĠMar cel
ĠP iet
iat rics
Ġsurround s
ĠRep rodu
ĠPhill ies
Ġuncertain ties
ĠE ur
ĠRom ance
ĠH ath
ĠNeed s
ĠCl oak
Ġcre m
que ue
Ġ3 55
Ġup front
] );
Ġrecip roc
Ġ19 27
Ġ11 00
ut su
Ġdep ressive
ow ment
F ans
Ġme ch
Ġann ihil
Ġcounter terrorism
ĠFig ures
b old
ĠMo ines
ĠDri vers
Ġmanuscript s
ĠCrypt o
Ġhyp not
redd its
Ġprosec utions
Ġdiver t
CR IP
ĠB ene
ĠRe ggie
Ġtax ing
ĠMor ales
ent ing
t ur
sign ificant
ĠPR OV
Ġstr ands
Ġp ouch
ĠR ookie
» Ĵ
Ġnic er
he my
h w
EC A
Ġintimid ated
Ġstr icter
Ġmicro bial
det ails
Ġv ows
Ġqu ake
hh hh
Ġrein vent
U b
Ġrel inqu
ĠBuff ett
lic ensed
itte red
ĠPic ard
Ġche wing
u cl
organ ic
Ġlocal ized
ĠEconom ist
Ġacqu ainted
Def inition
s ed
Crit ics
Ġc c
45 3
38 1
Ġfell ows
Ġcheck points
0 25
Ġre election
Ġmed iated
ĠK DE
Ġhurd le
Ġtext ing
Per fect
Ġtrust ees
fect ure
Ġd ich
mon ary
Ġdist inctions
Ġ14 00
Ġus her
Ġparas ites
ĠSh aring
ĠV im
Ġbar becue
ĠMin isters
ere lla
Ġe b
Ġm c
ĠSome how
ĠIn sect
ch anges
b road
ĠBy z
Ġgrap es
66 9
Ġ= ================
Ġass imil
Ġhaun ting
Ġfire power
Ġdef amation
em phasis
Ġcomp ose
Ġallerg ies
Ġstr ang
roll ers
b ang
Ġbrew ers
ron gh
ri ot
p oor
c old
S ample
Ġbu oy
0 40
ĠCourt ney
Ġ26 8
ĠWed ding
70 2
Ġobsess ive
Ġbra king
ĠL al
an ical
å ¦
at en
Con struction
Ġclin ically
iers hip
N ames
ĠDisc uss
ĠRam os
Ġloc ale
ĠAgric ultural
En able
Ġhorse power
ent ure
P ref
C ourt
Ġstaff ing
Ġfut uristic
dri vers
ĠMarket place
æĪ ¦
Friend s
Ġdam ning
ĠCustom ers
Ġwe eds
ĠM ai
Ġag ile
ĠT att
ic ent
R anked
cro ft
ĠKat y
Ext reme
Ġcar ve
ĠR over
ĠBy ron
37 2
Ġconduct s
r atch
it ia
ĠPump kin
Sad ly
Rel oaded
P olicy
Ġl ick
pe ak
is ks
ĠCD s
ĠEn cyclopedia
in itial
C os
ĠAware ness
ĠD ram
$$ $$
Ġr iff
Ġscript ure
run ners
Ġbo iler
ons on
o in
Ġham string
Ġcat aly
ĠArch bishop
ch all
Ġf aux
ok in
local host
ĠN AME
ad obe
S AN
am ate
Ġscram ble
Ġcar c
ĠMan ifest
ĠCed ar
ĠSer gio
l ater
ff er
Ġgrapp ling
ĠDe utsche
agon ists
ĠNew sp
Ġpret ended
arch ment
Ġcur ated
Ġhead phone
ĠUn common
ĠS IGN
A gent
Ġdead lines
Ġhorizont ally
ĠM AT
ĠSum mers
Ġord ained
ĠLast ly
ĠKend all
Ġfr ig
ĠMach ina
ĠWater loo
ĠMex icans
Ġprotect or
Ġgl are
} "
Prem ium
Ġr ift
ĠTelesc ope
Met al
Ġrec apt
Ġ; ;
Ġincl ination
Ġimp oses
ing en
^ {
Ġh aste
Ġd olphins
Ġcomm uters
pl anned
c ong
m x
ĠU pload
Ġext rap
ĠTuc son
ĠExpl oration
efe ated
Ġsl ender
70 3
ĠB uk
is el
Ġcompet itiveness
ch lor
ĠP ermanent
ĠE verett
ĠSpecial ist
ĠS OL
Ġcy an
ĠEx actly
U F
ĠL IFE
ary l
on et
ĠEmploy ee
aw ed
ĠRat ings
Ġextra vag
ul hu
ĠPl ane
Ġelev ate
ĠCoord inator
ĠWat kins
Ġex cludes
Ġsent ient
Ġep och
Ġall oc
Pre viously
ĠSh y
ĠSlov akia
L OCK
Ġmarked ly
Ġkn ob
Ġadventure rs
ĠBe en
ĠCost s
amm ers
Ġon slaught
ĠSupport ed
ĠT au
ik arp
ĠS overe
ĠHam pton
ãĤ ī
Pre v
ĠW orse
Ġc ottage
ĠH ades
le z
b owl
Ġfrag rance
ĠL ok
EM OTE
ĠPet ro
Ġ19 25
ĠP end
produ cing
Ġrel ocate
v ati
p ole
Ġsem in
ĠN UM
Ġrock ed
b uff
b ly
Rep ly
ĠH ai
Ġartic ulated
ĠIslam abad
66 5
ĠClaim s
Des ktop
Ġtrust ee
Ġscript ing
ĠS ob
ĠAs ylum
STD OUT
ĠCl own
ĠD ortmund
ĠDev on
l ite
ĠMar ble
Ġb unker
Ġcre st
Ġarous al
ĠS ears
ĠBudd y
ered ith
ĠP olly
Ġdec ode
ĠV ish
ĠRef lect
an on
Ġrefund s
imm ers
H M
Ġwip ing
Ġpuzz led
Ġmat te
un o
P ierre
) ),
Ġt ainted
Ġsymbol ism
ĠF raz
Ġprotest ors
ethe us
%% %%
W ra
Ġl ax
ad em
atur ation
ãĥ ĵ
ĠTra iler
ĠE NG
ĠBows er
Ġatt m
D ur
80 7
Ġsid x
Ġc ider
ĠA ffect
Ġw oven
ĠBark er
ben ef
Ġdst g
ĠRy u
> [
Ġsq or
S audi
Ġis tg
Ġindul ge
pro c
Ġdisg usted
Ġcomp ounded
Ġn em
Ġschool ing
ĠC ure
process ing
S ol
Ġpro verb
it ized
ĠAlv arez
Ġscar f
Ġrect angular
re ve
Ġh ormonal
ĠSt ress
itiz en
Ġ4 25
girl s
ĠNo ir
ĠR app
Ġmar ches
ch urch
ĠUs es
Ġ40 5
ĠBer m
Ġord inances
ĠJud gment
Charg es
ĠZ in
Ġdust y
Ġstraw berries
Ġper ce
ĠTh ur
ĠDebor ah
net flix
ĠLam bert
Ġam used
ĠGu ang
Y OU
R GB
ĠC CTV
Ġf iat
r ang
Ġf ederation
ĠM ant
ĠB ust
ĠM are
respect ive
ĠM igration
ĠB IT
59 0
Ġpatriot ism
Ġout lining
reg ion
ĠJos Ã©
Ġbl asting
ĠEz ra
B s
Ġundermin es
ĠSm ooth
Ġcl ashed
rad io
Ġtransition ing
ĠBucc aneers
ĠOw l
Ġplug s
Ġh iatus
ĠPin ball
Ġm ig
ĠNut r
ĠWolf e
Ġinteg ers
Ġor bits
ĠEd win
ĠDirect X
b ite
Ġbl azing
v r
Ed ge
ĠP ID
ex it
ĠCom ed
ĠPath finder
ĠGu id
ĠSign s
ĠZ er
ĠAg enda
Ġreimburse ment
M esh
i Phone
ĠMar cos
ĠS ites
h ate
en burg
Ġs ockets
p end
Bat man
v ir
ĠSH OW
Ġprovision al
con n
ĠDeath s
AT IVE
Pro file
sy m
J A
Ġnin ja
inst alled
id ates
eb ra
ĠOm aha
Ġse izing
ĠBe asts
Ġsal ts
M ission
Gener ally
ĠTr ilogy
he on
leg ates
Ġd ime
Ġf aire
par able
G raph
Ġtotal ing
Ġdiagram s
ĠYan uk
ple t
ĠMe h
Ġmyth ical
ĠStep hens
aut ical
ochem istry
Ġkil ograms
Ġel bows
anc ock
ĠB CE
ĠPr ague
Ġimpro v
ĠDev in
Ġ" \
par alle
Ġsuprem acists
ĠB illion
Ġreg imen
inn acle
Ġrequ isite
ang an
ĠBur lington
ain ment
ĠObject ive
oms ky
G V
Ġun ilateral
Ġt c
Ġh ires
ment al
Ġinvol untary
Ġtrans pl
ĠASC II
Â ¨
Ev ents
Ġdoub ted
ĠKa plan
ĠCour age
ig on
ĠMan aging
ĠT art
Ġfalse hood
ĠV iolet
Ġair s
Ġfertil izer
Brit ain
Ġaqu atic
ou f
W ords
ĠHart ford
Ġeven ings
ĠV engeance
qu ite
G all
ĠP ret
Ġp df
ĠL M
ĠSo chi
ĠInter cept
9 20
Ġprofit ability
ĠId le
ĠMac Donald
ĠEst ablishment
um sy
Ġgather ings
ĠN aj
Charl ie
Ġas cent
ĠProt ector
Ġal gebra
Ġbi os
for ums
EL S
Introdu ced
Ġ3 35
Ġastron omy
Cont ribut
ĠPol ic
Pl atform
Ġcontain ment
w rap
Ġcoron ary
ĠJ elly
man ager
Ġheart breaking
c air
ĠChe ro
c gi
Med ical
ĠAccount ability
! !"
oph ile
Ġpsych otic
ĠRest rict
Ġequ itable
iss ues
Ġ19 05
ĠN ek
c ised
ĠTr acking
Ġo zone
Ġcook er
ros is
Ġre open
Ġinf inity
ĠPharm aceutical
ens ional
Att empt
ĠR ory
Mar co
Ġawa its
H OW
t reated
Ġbol st
Ġreve red
Ġp ods
opp ers
00 10
Ġampl itude
ric an
SP ONSORED
Ġtrou sers
Ġhal ves
ĠK aine
ĠCut ler
ĠA UTH
Ġsplend id
Ġprevent ive
ĠDud ley
if acts
umin ati
ĠY in
Ġad mon
ĠV ag
Ġin verted
Ġhast ily
ĠH ague
L yn
Ġled ger
Ġastron omical
get ting
Ġcirc a
ĠC ic
ĠTenn is
Lim ited
Ġd ru
ĠBY U
Ġtrave llers
Ġp ane
ĠInt ro
Ġpatient ly
Ġa iding
Ġlo os
ĠT ough
Ġ29 3
Ġconsum es
Source File
Ġ"" "
Ġbond ing
Ġtil ted
Ġmenstru al
ĠCel estial
UL AR
Plug in
Ġrisk ing
N az
ĠRiy adh
Ġacc redited
Ġsk irm
é Ľ
Ġexam iner
Ġmess ing
Ġnear ing
ĠC hern
ĠBeck ham
Ġsw apped
Ġgo ose
K ay
Ġlo fty
ĠWal let
Ġ[ '
Ġap ocalypse
Ġb amboo
ĠSP ACE
ĠEl ena
Ġ30 6
ac ons
Ġtight ened
Ġadolesc ence
Ġrain y
Ġvandal ism
ĠNew town
Ġcon ject
c akes
Ġche ated
Ġmoder ators
par ams
E FF
Ġdece it
ĠST L
ĠTanz ania
ĠR I
Ġ19 23
ĠEx ile
the l
Ġthe olog
Ġquir ky
ĠIr vine
Ġneed y
or is
U m
K a
Ġmail box
3 22
Ġb os
ĠPet ra
K ING
Ġenlarg ed
O ften
Ġbad ass
Ġ3 43
ĠPl aces
ĠC AD
Ġpr istine
Ġinterven ing
d irection
Ġl az
ĠD SM
Ġproject ing
ĠF unk
ag og
pay ment
n ov
Ġch atter
AR B
Ġexam inations
ĠHouse hold
ĠG us
F ord
4 14
B oss
Ġmy stic
Ġle aps
ĠB av
ul z
b udget
Foot ball
Ġsubsid ized
Ġfirst hand
Ġcoinc ide
oc ular
Con n
ĠColl abor
Ġfool s
am ura
ah ar
r ists
Ġsw ollen
Ġexp ended
ĠP au
s up
Ġsp ar
Ġkey note
s uff
Ġunequ al
Ġprogress ing
str ings
ĠGamer gate
Dis ney
ĠEle ven
om nia
Ġscript ed
Ġear ners
bro ther
ĠEn abled
æ ³
Ġlar vae
ĠL OC
m ess
Wil son
ĠTem plate
success fully
Ġparam ount
Ġcamoufl age
Ġbind s
ĠQu iet
ĠSh utterstock
r ush
Ġmasc ot
fort une
ĠCol t
ĠBe yon
hab i
Ġha irc
Ġ26 7
ĠDe us
Ġtw itch
Ġconcent rating
Ġn ipples
c ible
Ġg ir
N Z
M ath
n ih
Requ ired
Ġp onder
ĠS AN
Ġwedd ings
Ġl oneliness
N ES
ĠMah jong
69 5
add le
ĠGar ner
ĠC OUR
Br idge
Ġsp ree
ĠCald well
Ġbri bery
Ġï¿½ï¿½ï¿½ï¿½ ï¿½ï¿½ï¿½ï¿½
plug ins
Ġr acket
Ġchamp agne
vers ible
V ote
Ġmod ifiers
May or
6 80
Ġassemb lies
ĠS ultan
ĠN ing
ĠLad ies
Ġsulf ur
Ġor bs
Ġ---- -
____ ___
ĠJournal ism
Ġes ports
Ġl ush
Ġh ue
Ġspect ral
H onest
ãĥ ı
Ġbus hes
Ġrein forcement
Ġre opened
ĠWhe els
ĠM org
rie ving
Ġaux iliary
Ġj Query
ĠB AT
tes que
Ġver tex
p ure
f rey
ãĤ º
d os
Ġty ph
Ġc ull
Ġe q
Ġdec on
Ġtoss ing
Ġdispar ate
ĠBr igham
print f
led ged
Ġsu nd
Ġco zy
Ġhepat itis
per forming
Ġav al
ĠG G
f uture
Ġpet ertodd
ĠKos ovo
Ġmagn ets
Al ready
ĠEd ison
ĠCe res
ĠRA ID
Ġbrill iance
57 6
Ġder ives
Ġhypert ension
ĠÎ Ķ
Ġlamb da
Ġfl air
Ġmission aries
Ġrap es
ĠSt arter
ĠMon ths
Ġdef y
Ġseism ic
ĠR aphael
Ġeuro zone
65 6
z sche
Ġscr atched
Ġb ows
ĠLenn on
ĠGa ia
Ġdri pping
f acts
A le
Ġfrog s
ĠBre ast
ogene ity
ĠProsecut or
Ġampl ified
ĠHod g
ĠF n
Th ousands
ĠNI H
ĠMonitor ing
FT WARE
ĠPri ebus
ĠG rowing
hun ter
Ġdiagn ose
ĠM ald
ĠL R
Ġcrown ed
Ġburst ing
Ġdiss olution
j avascript
Ġuseful ness
ĠExec ution
: (
ĠIv ory
a ah
Ġpersecut ed
viol ence
ist as
ĠCr ate
Ġimpuls es
ĠSp ani
ed es
Hand le
ĠZ erg
think able
Last ly
Ġspont aneously
Ġinconven ient
Ġdismiss ing
Ġpl otted
Ġeight y
Ġ7 37
r ish
ĠThor nton
ath am
Ġsit com
V en
Rec ipe
t el
l und
Ġcle ars
ĠSas uke
Ġ25 8
Ġopt ing
Ġen raged
est hetic
ĠA e
uch s
Pre p
Fl ow
Ġrun off
ĠE ating
ĠG iles
ĠAct ing
res ources
ib aba
Ġr pm
Ġske wed
ĠBl anc
ĠS akuya
Ġhot ter
Ġ19 24
op ian
ck o
Ġcr umbling
Ġcapt ains
ĠAppropri ations
le aders
dro pping
an uts
Ġrevers ing
ĠP ose
ĠS ek
Sc ot
ĠIde a
c ise
ĠSloven ia
Ġ3 17
Do ctor
Ġcro cod
ald i
Se a
ĠFar rell
Ġmerc enaries
ĠR NC
ĠGu ess
Ġp acing
M achine
Streamer Bot
ĠChar ity
Ġ29 8
Ġcann ons
ĠTob y
TPP StreamerBot
ĠPass ion
cf g
Th om
Ġbad ges
ĠBern stein
. âĢĵ
ĠP OP
ĠCon j
Ġinitial ization
Ġbiod iversity
D ub
Ġfeud al
Ġdisclaim er
Ġc row
Ġign ition
ar f
S HA
Ġk Hz
h azard
ĠArt ists
oe uv
67 9
ĠRud y
N ine
ĠRam adan
å ½
itt o
Ġadren aline
C ert
Ġsmell ed
Ġimp unity
Ġag endas
ĠRe born
ĠCon cent
ĠSe ems
Ġo mega
ĠDust in
Ġback er
ĠSau ce
ĠBoy le
W IN
Ġsp ins
Ġpa uses
u pt
Ġshred ded
Ġstra pped
ĠCor ruption
Ġscr atches
Ġn i
Ġatt ire
ĠS AF
Factory Reloaded
ĠI PS
Ġ( %
Ġsem inar
f ocus
c ivil
Ġ18 60
int osh
Ġcontin ual
Ġabbre vi
ĠS ok
oc obo
X M
Ġfr antic
Ġunavoid able
Ġar tery
Ġannot ations
b ath
Cl imate
Ġd ors
ĠSl ide
co ord
ĠRel oad
ĠL DL
ĠLove craft
Ġunim agin
Ġresemb led
Ġbarr acks
n p
Ġsurrog ate
Ġcategor ized
ãĤ ©
Ġvacc inated
Ġdrain age
Ġind ist
ĠWhats App
Ġ18 70
oler ance
inv oke
am orph
Ġrecon nect
Ġem anc
Ġblind ness
Ġ12 80
intern et
c ollar
Ġalt ru
Ġab yss
ĠT RI
65 7
Ġinf used
HE AD
Ġforest ry
ĠWood y
ĠC i
w i
s am
78 4
hol iday
Ġmog ul
ĠF ees
ĠD EN
In ternal
ur bed
f usc
at om
ĠIll usion
Ġpoll ed
Ġfl ap
Ġco ax
L GBT
An aly
ĠSect ions
ĠCalif orn
em n
Ġh ither
ĠN IGHT
Ġn ailed
ĠPip eline
39 1
o of
ĠPr imal
vere nd
Ġsl ashing
Ġret ri
avi our
Ġdepart ing
g il
IS C
Ġmid way
Ġultras ound
Ġbeh aving
ĠT ara
class es
V irtual
ĠColon ial
Ġstri pping
Ġorchestr ated
ĠGra ves
45 2
ĠIron ically
ĠWrit ers
Ġl ends
ĠMan z
Ġra ven
Ġoxid ative
Ġ26 6
EL F
act ually
asc ar
D raft
Ġfavour able
Ġhumili ating
Ġf idelity
ĠH of
ĠX uan
49 6
Ġlay ered
at is
79 0
Ġpay check
it on
K ar
ĠVM ware
ĠFar mer
Ġserv ic
gl omer
Ġsl ump
ĠFab ric
ĠD OC
est ing
Ġreass ure
Ġph yl
v olt
it ory
R ules
Ġoxid ation
Ġpri zed
Ġmist ress
ĠDj ango
WAR N
å ĳ
Ġenc ode
ĠFeed back
Ġstupid ity
I an
ĠYugoslav ia
× ¨
ac l
UT E
19 77
Ġqual ifies
Ġpuls es
pret ty
Ġfro ze
Ġs s
Iter ator
Ġur gently
Ġm ailed
ĠCh am
Ġsust aining
Ġbas il
Ġpupp ies
il ant
ĠP LEASE
l ap
ace ous
F ear
ĠMaster y
aut omatic
ĠT AG
Ġant im
ag les
47 3
fram es
Ġwh ispers
ĠWho ever
Ġbra very
ĠUK IP
ract ions
"" "
Ġt ame
Ġpart ed
every thing
CON T
Ġind ebted
Ġadd r
re k
IR ED
Ġem inent
cl inton
Ġo usted
Ġreview er
Ġmelt down
Ġre arr
ĠY ao
the real
aby te
Ġst umbling
Ġbat ches
Ġ25 9
Ġcontrace ptive
Ġprost itute
ens is
De cl
ĠSt rikes
M ilitary
ĠO ath
v acc
pp ings
05 2
Ġpart Name
amp ing
Rep orts
K I
CH R
Ġsubt ly
sw ers
Bl ake
us ual
Ġcontest ants
Ġcart ridges
ĠGRE AT
Ġbl ush
ĠâĢ º
47 2
Ġreason ed
ãĥ ¤
paralle led
Ġd yn
ag ate
Ġnight ly
å Ĩ
55 6
Ġsem antic
ĠAdv oc
Ġ !!
Ġdisag rees
ĠB W
V eh
Ġharm ing
Ġembr aces
Ġstri ves
Ġin land
ĠK ard
Ġhe ats
ĠGin ny
ut an
ern aut
yl ene
ĠE lev
J D
Ġh ars
ĠStar r
Ġsk ysc
Ġcollabor ators
Us ually
Ġrev olutions
ĠSTAT S
Ġdism antle
Ġconfident ly
Ġkin etic
Al i
Ġpercent ile
Ġextract ing
ill ian
est ead
Ġphysic ists
ĠMarsh al
Ġfell owship
Ġd ashed
ĠU R
ĠSi oux
ĠComp act
am ide
P ython
ĠLe igh
ĠPharm ac
ist rates
her ical
Ġf ue
ĠE min
Ġ( {
ĠNeighbor hood
Ġdisrupt ing
ĠD up
Ġg land
ĠSe v
ĠMar ian
arg on
ĠD und
Ġ< !--
Ġstr and
Ġstadium s
z os
Ġpsych osis
ĠR ack
Ġbrilliant ly
ï¸ ı
Ġsubmer ged
ĠInst it
ĠCh ow
Ġc ages
ĠH ats
ĠU rs
Ġdil uted
us at
ien ne
ĠMembers hip
ĠBur k
Ġ ie
Ġarche type
D rug
ult on
ĠSp ock
ĠMcK ay
ĠDep end
F eatured
S oc
19 78
ĠB ere
Ġrelent lessly
Ġcripp ling
Ġar thritis
çĶ Ł
ĠTrop ical
ĠBul g
ĠCher yl
Ġadm irable
Ġsub title
Over ride
Ġorig inating
ĠC CP
Ġsw ore
ĠSo le
ĠDis orders
3 29
Ġprocess ion
Ġref urb
Ġimm ersed
requ ently
Ġskept ics
Ġcer amic
m itter
en stein
b elt
ĠT IT
b idden
Ġf ir
m ist
> ]
Ġwe ave
ĠParad ox
Ġentr usted
ĠBarcl ays
Ġnovel ist
og ie
80 6
Ġnin ety
Ġdisag reements
@@@@ @@@@
ĠAus chwitz
c ars
ĠL ET
t ub
arant ine
P OS
Ġback story
Ġcheer ful
ĠR ag
ek a
bi ased
Ġinexper ienced
ak ra
ĠW itt
t an
Ġrap ist
Ġplate au
ch al
ĠInqu is
exp ression
Ġc ipher
Ġsh aving
add en
re ly
( \
ism a
ĠReg ulatory
CH AR
ily n
N VIDIA
G U
Ġmur m
la us
Christ opher
Ġcontract ual
ĠPro xy
ĠJa ime
ĠMethod ist
Ġstew ards
st a
per ia
Ġphys iology
Ġbump ed
Ġf ructose
Austral ian
ĠMet allic
ĠMas querade
ar b
Ġprom ul
Ġdown fall
Ġbut cher
Ġb our
ĠIN FORMATION
ĠB is
pect s
ad ena
Ġcontempl ating
ar oo
cent ered
ĠPe aks
Us ed
Ġmod em
Ġg enders
Ġ8 000
37 1
Ġm aternity
ĠR az
Ġrock ing
Ġhandgun s
ĠD ACA
Aut om
ĠN ile
Ġtum ult
ĠBenef it
ĠAppro ach
works hop
ĠLe aving
G er
inst ead
Ġvibr ations
Ġrep ositories
49 7
ĠA unt
ĠJ ub
ĠExp edition
Al pha
Ġs ans
Ġoverd ue
Ġoverc rowd
Ġlegisl atures
Ġp aternal
ĠLeon ardo
Ġexp ressive
Ġdistract ions
Ġsil enced
tr ust
Ġb iking
Ġ5 60
Ġpropri et
Ġimp osition
Ġcon glomer
Ġ= ================================================================
ĠTe aching
ĠY ose
int ensive
T own
Ġtroll ing
ĠGr ac
ĠAS US
Y o
Ġspecial s
ĠNep h
ĠGod zilla
Dat abase
ĠHe gel
Ġ27 2
19 76
ĠGl oria
Ġdis emb
ĠInvestig ations
ĠB ane
ag ements
St range
Ġtre asury
ĠPl ays
Ġundes irable
Ġwid ening
Ġverb ally
Ġinf ancy
Ġcut ter
f ml
Ġ21 00
prot otype
f ine
Ġdec riminal
Ġdysfunction al
Ġbes ie
ĠErn st
z eb
Ġnort heastern
Ġa ust
por ate
ĠMar lins
Ġsegreg ated
ew orld
ĠMa her
Ġtra verse
Ġmon astery
ur gy
G ear
s and
Com pl
ĠE MP
Ġpl ent
ĠMer cer
Ġ27 6
TA BLE
Config uration
H undreds
Ġpr ic
Ġcollabor ating
ĠPar amount
ĠCumm ings
Ġ( <
Ġrecord er
Ġfl ats
Ġ4 16
wh ose
Font Size
ĠOr bit
Y R
Ġwr ists
Ġb akery
) }
ĠB ounty
ĠLanc aster
Ġend ings
acc ording
ĠSal am
e asy
75 5
ĠBur r
ĠBarn ett
onom ous
Un ion
Ġpreced ence
ĠScholars hip
ĠU X
Ġroll out
Ġbo on
al m
ĠCan ter
æ µ
Ġround ing
Ġcl ad
Ġv ap
ĠF eatured
is ations
Ġ5 40
pol ice
Ġunsett ling
Ġdr ifting
ĠLum ia
ĠObama Care
ĠF avor
Hy per
ĠRoth schild
ĠMil iband
an aly
ĠJul iet
H u
Ġrec alling
a head
69 6
Ġunf avorable
Ġd ances
O x
Ġleg ality
Ġ40 3
rom ancer
Ġinqu ire
ĠM oves
\ ">
ĠVari ant
ĠMess iah
ĠL CS
ĠBah Ã¡
75 6
Ġeyeb row
ĠÂ ¥
ĠMc F
ĠFort y
M as
Ġpan icked
Ġtransform ations
q q
Ġrev olves
ring e
ĠA i
ax e
Ġon ward
ĠC FR
ĠB are
log in
Ġliqu ids
Ġde comp
second ary
il an
ĠCon vert
ami ya
Ġprosecut ing
Ġâī ¡
ĠYork ers
ĠByr ne
sl ow
aw ei
J ean
Ġ26 9
ĠSky dragon
Ġ Ã©
ĠNicarag ua
ĠHuck abee
ĠHigh ly
Ġamph ib
ĠPast or
ĠL ets
Ġbl urred
Ġvisc eral
ĠC BO
Ġcollabor ated
z ig
Leg al
Ġapart heid
Ġbr id
Ġpres et
ĠD ET
ĠAM A
× Ķ
arch ing
auc uses
build er
Ġpo etic
Ġem ulator
ĠMole cular
Ġhon oring
ise um
Ġtract or
ĠCl uster
ĠCal m
ared evil
Ġsidew alks
Ġviol in
Ġgeneral ized
ĠAle c
Ġemb argo
Ġfast ball
ĠHT TPS
ĠL ack
ĠCh ill
ri ver
C hel
ĠSw arm
ĠLev ine
ro ying
L aunch
Ġkick er
Ġadd itive
ĠDe als
W idget
cont aining
Ġescal ate
ĠOP EN
Ġtwe aked
Ġst ash
Ġsp arks
ĠEs sex
ĠE cc
Ġconv ict
Ġblog ging
I ER
ĠH L
Ġmurd erers
75 9
ĠH ib
Ġde pl
ĠJ ord
S ac
Ġdis sect
ĠHow e
os her
Ġcustom izable
ĠFran z
Ġat ro
Ä ĩ
Ġ000 4
Ġout post
R oss
Ġglyph osate
ĠHast ings
ĠBE FORE
Ġsh ove
o pped
ĠSc ala
Ġam ulet
an ian
Ġexacerb ated
Ġe ater
47 1
UM E
Ġpul p
izont al
ĠZ am
ĠAT I
imm une
aby tes
Ġunnecess arily
ĠC AT
ĠAx is
Ġvisual ize
Ã ī
ĠRad ical
f m
Doc uments
ĠFor rest
Ġcontext ual
ĠSy mbol
Ġtent ative
ĠDO ES
ĠGood s
Ġintermitt ent
} :
medi ated
Ġridic ule
Ġathe ism
Ġpath ogens
ĠM um
Ġre introdu
Ġ30 7
i HUD
Ġflash light
Ġsw earing
Ġp engu
B u
Ġrot ated
ĠCr ane
Ġ() );
Ġfashion able
Ġendors ing
46 3
) [
Ġingest ion
Ġcook s
Ġ9 50
ot omy
ĠIm am
Ġk a
Ġte aser
ĠGhost s
ĠãĤ µ
19 69
Ï ĥ
ub by
Ġconver ter
zan ne
end e
ĠPre par
ĠNic kel
ĠChim era
h im
ĠTyr ann
ĠSabb ath
ĠNich ols
Ġra pt
ih ar
Ġshe lling
Ġillum inate
Ġdent ist
ut or
ĠInteg ration
Ġwh ims
ĠLiter ary
Be aut
Ġp archment
ag ara
Br and
Ġder og
âĢ¦ )
ĠNor se
Ġunw itting
Ġc uc
Ġborder line
Ġupset ting
Ġrec ourse
Ġd raped
ĠRad ar
Ġcold er
ĠPep si
im inary
], [
65 8
V i
ĠF rem
ĠP es
Ġveter inary
ĠT ED
ĠEp idem
n ova
k id
Ġdev out
o ct
j ad
M oh
ĠP AY
Ġge ometric
Ġ3 23
Ġcircum ference
ich ick
19 75
ĠY uri
ĠSh all
ĠH over
un in
S pr
Ġg raft
ĠHapp iness
Ġdisadvant ages
att acks
Ġhub s
ĠStar Craft
é ĸ
Ġgall eries
ĠKor ra
Ġgrocer ies
ĠGors uch
Ġrap ists
Ġfun gi
ĠTyph oon
V ector
ĠEm press
b attle
4 68
Ġparas ite
ĠBom ber
S G
ex ist
ĠP f
Ġun se
Ġsurge ons
B irth
ĠUn sure
ĠPrint ed
ĠBehavior al
ĠA ster
Pak istan
Ġun ethical
Ġs v
ĠIo T
Ġlay outs
P ain
Ġconst ants
ĠL W
ĠB ake
Ġtow els
Ġdeterior ation
ĠBol ivia
Ġblind ed
ĠW arden
ĠMist ress
Ġon stage
Ġcl ans
ĠB EST
19 60
Ġant ique
Ġrhet orical
ĠPer cy
ĠRw anda
, .
B ruce
Ġtra umat
ĠParliament ary
Ġfoot note
id ia
ĠLear ned
se eking
gen ic
Ġdim ensional
H ide
èĢ ħ
Ġintrig ue
in se
Ġle ases
Ġapp rentices
w ashing
Ġ19 26
V ILLE
Ġsw oop
s cl
Ġbed rooms
on ics
ĠCr unch
comp atible
Ġincap ac
ĠYemen i
ash tra
z hou
d anger
Ġmanifest ations
ĠDem ons
AA F
Secret ary
ACT ED
L OD
Ġam y
ra per
eth nic
4 17
Ġpos itives
Ġ27 3
ĠRefuge es
Ġus b
ĠV ald
odd y
ĠMahm oud
As ia
Ġskull s
ĠEx odus
ĠComp et
ĠL IC
ĠM ansion
ĠA me
Ġconsolid ate
storm s
ont ent
99 6
Ġcl en
Ġm ummy
fl at
75 8
ĠV OL
oter ic
n en
ĠMin ute
S ov
Ġfin er
R h
ly cer
Ġreinforce ments
ĠJohann es
ĠGall agher
Ġgym n
S uddenly
Ġext ortion
k r
i ator
T a
Ġhippocamp us
N PR
ĠComput ing
Ġsquare ly
Ġmod elling
ĠFor ums
ĠL isp
ĠKrish na
Ġ3 24
Ġr ushes
Ġens ued
Ġcre eping
on te
n ai
il ater
ĠHorn ets
Ġob livious
IN ST
55 9
Ġjeopard y
Ġdistingu ishing
j ured
Ġbeg s
sim ilar
ph ot
5 30
ĠPark way
Ġs inks
ĠHearth stone
ib ur
ĠBat on
Av oid
Ġd ancer
Ġmag istrate
ary n
Ġdisturb ances
ĠRom ero
Ġpar aph
Ġmis chief
âĸ ĵ
ĠSh aria
Ġur inary
r oute
iv as
f itted
Ġeject ed
ĠAl buquerque
Ġ4 70
Ġirrit ated
ĠZ ip
ĠB iol
Ã į
Ġden ounce
Ġbin aries
ĠVer se
Ġopp os
ĠKend rick
ĠG PL
Ġsp ew
ĠEl ijah
ĠE as
Ġdr ifted
so far
Ġannoy ance
ĠB ET
47 4
ĠSt rongh
it ates
ĠCogn itive
oph one
ĠIdent ification
ocr ine
connect ion
Ġbox er
ĠAS D
ĠAre as
Y ang
t ch
ull ah
Ġdece ive
Comb at
ep isode
cre te
W itness
Ġcondol ences
ht ar
Ġhe als
Ġbuck ets
ĠLA W
B lu
Ġsl ab
ĠOR DER
oc l
att on
ĠSteven son
ĠG inger
ĠFriend ly
ĠVander bilt
sp irit
ig l
ĠReg arding
ĠPR OG
Ġse aling
start ing
Ġcard inal
ĠV ec
ĠBe ir
Ġmillisec onds
we ak
per se
Ġster ile
ĠCont emporary
ĠPh ant
ĠCl o
Ġout p
Ġex iled
Ġ27 7
Ġself ie
Ġman ic
Ġn ano
ter ms
Alex ander
Ġres olves
Ġmillenn ia
Ġexpl odes
Ġconst ellation
Ġadul tery
m otion
D OC
Ġbroad casters
Ġkinderg arten
ĠMay weather
ĠE co
ich o
Ġ28 7
l aun
Ġm ute
Ġdisc reet
Ġpres chool
Ġpre empt
De lete
ĠFre ed
P i
H K
Ġblock er
ĠC umber
Ġw rought
d ating
Ġins urer
Ġquot as
Ġpre ached
Ġev iction
ĠReg ina
ĠP ens
Ġsevent een
ĠN ass
D ick
Ġfold s
Ġd otted
ĠA ad
Un iversal
Ġp izz
ĠG uru
Ġso ils
Ġno vice
ĠNe ander
Ġst ool
Ġdeton ated
ĠPik achu
ĠMass ive
IV ER
ĠAb del
Ġsubdu ed
Ġtall est
Ġprec arious
Ġa y
r ification
ĠOb j
c ale
Ġun question
cul osis
ad as
igr ated
D ays
Ġque ens
ĠGaz ette
ĠCol our
ĠBow man
ĠJ J
Ã¯ ve
Ġdomin ates
Stud ent
Ġm u
Ġback log
ĠElect ro
Tr uth
48 3
Ġcond ensed
r ules
ĠCons piracy
Ġacron ym
hand led
ĠMat te
j ri
ĠImp ossible
l ude
cre ation
Ġwar med
ĠSl ave
Ġmis led
Ġfer ment
ĠK ah
ink i
ke leton
cy l
ĠKar in
Hun ter
Reg ister
ĠSur rey
Ġst ares
ĠW idth
ĠN ay
ĠSk i
Ġblack list
uck et
Ġexp ulsion
im et
Ġret weet
vant age
Fe ature
Ġtro opers
Ġhom ers
9 69
Ġconting ency
ĠW TC
ĠBrew er
fore ign
W are
S olar
Ġund ue
RE C
ulner able
path ic
ĠBo ise
Ġ3 22
Ġarous ed
ĠY ing
ä¸ į
uel ess
Ġp as
Ġmor p
Ġfl oral
Ex press
ud ging
k B
ĠGr anted
Ø ¯
ĠMich a
ĠGoth ic
ĠSPEC IAL
ĠRic ardo
F ran
Ġadminister ing
6 20
por a
ĠÂ ®
Ġcomprom ises
Ġb itten
Ac cept
Th irty
Ð ²
Ġmater ially
ĠTer r
ig matic
ch ains
Ġdo ve
stad t
Mar vel
FA ULT
Ġwind shield
Ġ3 36
ad ier
Ġsw apping
Ġflaw less
ĠPred ator
ĠMiche le
Ġprop ulsion
ĠPsych ic
Ġassign ing
Ġfabric ation
Ġbar ley
l ust
Ġtow ering
Ġalter cation
ĠBent ley
Sp here
Ġtun a
ĠClass es
Fre edom
un er
L ady
v oice
Ġcool est
or r
Ġpal p
$ {
Ġhyster ia
ĠMet atron
p ants
Ġspawn ing
Exper ts
ĠInvest ors
ĠAn archy
Ġshr unk
ĠVict im
Ġ28 9
Ġec stasy
ĠB inding
58 5
ĠMel ody
57 8
ot ally
ĠE tsy
lig a
Ġapplaud ed
Ġswe ating
Ġredist ributed
Ġpop corn
Ġsem inal
f ur
ĠNeuro science
R and
ĠO st
ĠMadd en
ĠIncre asing
ĠDaw kins
ĠSub way
Ġar sen
cons erv
B UR
Ġsp iked
ĠLy ft
ĠImper ium
ĠDrop box
Ġfav oured
Ġencomp asses
gh ost
Ġins pires
Ġbur geoning
ĠY oshi
ĠVert ical
ĠAud itor
Ġint ending
Ġfilib uster
Bl oom
f ac
ĠCav s
ign ing
Ġcowork ers
ĠBarb arian
rem ember
FL AG
Ġaudit ory
ason ry
Col lege
Ġmut ed
gem ony
ob in
ĠPsych o
9 68
Ġlav ish
Ġhierarch ical
ĠDr one
ou k
Ġcripp led
ĠMax im
Sl ot
Ġqu iz
ĠV id
if ling
Ġarchae ologists
Ġabandon ment
d ial
le on
ĠF as
T ed
Ġr aspberry
Ġmaneu vers
Ġbehavi ours
Ġins ure
Ġrem od
Sw itch
h oe
Ġsp aced
Ġafford ability
ĠF ern
not ation
ĠBal anced
Ġoccup ies
en vironment
Ġneck lace
Ġsed an
F U
ĠBrav o
Ġab users
ĠAn ita
met adata
ĠG ithub
ait o
ĠF aster
ĠWass erman
ĠF lesh
Ġth orn
r arily
ĠMer ry
w ine
Ġpopul ace
ĠL ann
Ġrepair ing
Ġpsy che
Ġmod ulation
aw aru
âĢĭ âĢĭ
ari j
Ġdecor ations
Ġapolog ise
ĠG arg
app ly
Ġgive away
ĠFl an
ĠWy att
U ber
Ġauthor ised
ĠMor al
HAHA HAHA
activ ate
Ġtorped o
ĠF AR
Ġam assed
ĠA ram
ark in
ĠVict ims
st ab
Ġo m
ĠE CO
Ġopio ids
Ġpurpose ly
ĠV est
Ġer g
at an
ĠSur gery
Ġcorrect ing
ĠOrt iz
ĠBe et
Ġrev oke
Ġfre eway
ĠH iggins
F ail
ĠFar ms
ĠAT P
h ound
Ġp oking
ĠCommun ists
mon ster
iment ary
Ġunlock ing
Ġunf it
we ed
en ario
at ical
ĠEnlight enment
ĠN G
ĠComp ensation
de en
ĠWid ow
ĠCind y
ĠAfter wards
Ġ6 000
ikh ail
ag ically
Ġrat ified
Ġcasual ty
H OME
p sey
f ee
Ġspark ling
Ġd Ã©
Ġconcert ed
C atal
Ġcomp lying
ĠA res
ĠD ent
Sh ut
Ġsk im
ad minist
Ġhost ilities
ĠG ins
Ġ6 08
Ġm uddy
ĠMc Int
ĠDec ay
5 25
Ġconspic uous
ĠEx posure
Ġresc ind
Ġwear able
Ġ3 28
our met
ah s
ĠRob ots
Ġe clips
inst ance
ĠRE PORT
ĠApp l
0 30
ĠSk ies
01 00
Ġfall acy
S ocket
ĠRece iver
Ġsol ves
ĠButter fly
ĠSho pping
ĠFI RE
65 4
Med ic
Ġsing ers
ĠNeed less
'' ''
isher s
ĠD ive
58 8
Ġselect ively
Ġcl umsy
88 9
Ġpurch aser
ear ned
ard y
Ġbenef iting
eng lish
Ġyield ing
ĠP our
Ġspin ach
Ġdel ve
ĠC rom
6 10
Ġexport ing
ĠMA KE
Ġ26 3
Ġg rop
Ġenv oy
ĠInqu iry
ĠLu igi
d ry
ĠT uring
Thumbnail Image
ĠVar iety
Ġfac et
Ġfl uffy
Ġexcerpt s
Ġsh orth
ĠOl sen
CL UD
Ġrel iant
ĠUN C
T our
Ġbat hing
Comp any
Ġglobal ization
P red
ĠMalf oy
Ġh oc
j am
craft ed
ĠBond s
ĠKiss inger
Eng land
Ġorder ly
cat entry
Ġ26 1
Ġexch anging
ĠInt ent
ĠAmend ments
D OM
Ġst out
ÂłÂłÂłÂłÂłÂłÂłÂł ÂłÂłÂłÂłÂłÂłÂłÂł
ĠAir bus
Ġ27 8
hy de
P oll
Item ThumbnailImage
Ġlooph oles
ĠPill ar
Ġexpl or
St retch
A part
Ġun married
Lim it
ĠTransform ers
Ġintellect ually
unct ure
18 00
Ġd arn
B razil
Ġleft over
ber us
f red
Mine craft
3 26
ĠForm s
Ġproof s
ĠDes igned
Ġindex es
ĠSupp ose
EM S
ĠL oving
ĠBon nie
im ating
OT US
Ġconduct or
Ġbehav ed
ĠF ren
Ġsy nerg
Ġmillenn ium
Ġcater ing
ĠL auder
W r
ĠY iannopoulos
ĠAT F
Ġensl aved
Ġawaken ed
D VD
ĠED ITION
ĠConc ert
ĠChall enger
ĠH aku
umer ic
Ġdep recated
ĠSH AR
4 12
Ġdy stop
Ġtremb ling
Ġdread ed
ĠSp ac
p adding
Re pl
ĠG arrison
M ini
Ġun paralleled
am ar
URR ENT
w reck
c ertain
t al
ĠC LS
app ings
Ġsens ed
Ġf encing
ĠPas o
ĠDes k
Ġsc off
Ġcontem plate
ĠL iga
l iquid
75 7
Ġapp rentice
ĠUCH IJ
5 70
ĠTh ousand
ĠIll um
Ġchampion ed
ãĤ Į
Ġelect ors
Ġ3 98
ĠH ancock
round ed
ĠJ OHN
Ġuns atisf
Ġqual ifier
ĠGad get
EN E
Ġdead liest
ĠPl ants
Ġ ions
Ġacc ents
Ġtwe aking
Ġsh aved
F REE
ĠCh aser
Again st
9 60
Ġmeth amphetamine
Ġnormal ized
Ġ$ \
ĠPre cision
ĠGu am
Ġch oked
ĠX II
ĠCast ing
Tor rent
Ġscal p
ĠJagu ar
w it
Ġsem ic
ix ie
ĠG ould
Ġconf ines
N usra
ĠL on
ĠJ ugg
y cle
ĠCod ec
E gypt
Ġrest rain
ĠAl iens
Ġch oking
ĠD unk
ĠBell a
ab c
Ġsl ang
Ġneuro trans
s av
Ġempower ment
â ĨĴ
Ġclim bers
ĠM im
ĠF ra
ros se
Cap ital
ĠCth ulhu
Inter face
Ġprof icient
ĠIN TO
Ġ3 18
ront al
5 80
ĠDes pair
K enn
Ġscrim mage
ĠCo at
as ions
Ġwall paper
ĠJ ol
Ġresurg ence
Ġant iv
ĠB alls
² ¾
Ġbuff ers
Ġsub system
ĠSt ellar
ĠL ung
A IDS
Ġerad icate
Ġblat antly
Ġbehav es
ĠN un
Ġant ics
ex port
DE V
w b
Ġph p
ĠInteg rity
Ġexplore r
Ġrev olving
auth ored
g ans
Ġbas k
Ġas ynchronous
å į
TH ING
69 8
G ene
ĠR acer
ĠN ico
iss ued
Ġser mon
p ossibly
Ġsize of
Ġentrepreneur ial
ox in
ĠMin erva
Ġpl atoon
n os
ri ks
A UT
ĠAval anche
ĠDes c
ĳ å£«
ĠP oc
Ġconf erred
Î »
Ġpat ched
F BI
66 2
Ġfract ures
Ġdetect s
Ġded icate
Ġconstitu ent
Ġcos mos
W T
Ġswe ats
Ġspr ung
b ara
s olid
Ġuns us
Ġbul ky
ĠPhilipp e
ĠFen rir
Ġtherap ists
ore al
^^ ^^
Ġtotal ed
Ġboo ze
ĠR PC
Prosecut ors
Ġdis eng
ĠSh ared
Ġmotor cycles
Ġinvent ions
Ġlett uce
ĠMer ge
ĠJ C
Ġspiritual ity
ĠWAR NING
Ġunl ucky
ĠT ess
Ġtong ues
ĠD UI
T umblr
Ġle ans
Ġinv aders
Ġcan opy
ĠHur ricanes
ĠB ret
ĠAP PLIC
id ine
ick le
Reg arding
Ġve ggies
Ġe jac
ju ven
F ish
D EM
ĠD ino
Th row
ĠCheck ing
be ard
( &
Ġj ails
Ġh r
trans fer
iv ating
Ġfle ets
ĠIm ag
ĠMc Donnell
Ġsnipp et
Is a
ĠCh att
ĠSt ain
ĠSet FontSize
ĠO y
ĠMathemat ics
49 4
Ġelectro ly
ĠG ott
ĠBr as
B OOK
ĠF inger
d ump
Ġmut ants
Ġrent als
Ġinter tw
Ġc reek
ail a
Bro ther
ĠDisc ord
pe e
raw ler
Ġcar p
Ġ27 9
ãĤ· ãĥ£
rel ations
Ġcontr asts
Col umn
Ġrec onnaissance
Ġun know
Ġl ooting
Ġregul ates
Ġopt imum
ĠChero kee
ĠA ry
Lat est
Ġroad side
Ġd anced
ĠUnic orn
A cknowled
Ġuncont roll
ĠM US
at io
ch ance
ha ven
VAL UE
Ġfavour ites
Ġceremon ial
b inary
pe ed
wood s
EM P
Ġv ascular
Ġcontempl ated
Ġbar ren
ĠL IST
Y ellow
ospons ors
Ġwhisk y
ĠM amm
ĠDeV os
min imum
H ung
44 2
P ic
ĠSnap dragon
77 6
Ġcar ving
Ġund ecided
Ġadvantage ous
Ġpal ms
ĠA Q
Ġst arch
L oop
Ġpadd le
Ġfl aming
ĠHor izons
An imation
bo ost
Ġprob abilities
ĠM ish
Ġex odus
ĠEditor ial
Ġfung us
Ġdissent ing
ĠDel icious
rog ram
ĠD yn
d isk
t om
Ġfab rics
ĠC ove
ĠB ans
Ġsoft en
ĠCON S
Ġin eligible
Ġestim ating
ĠLex ington
pract ice
of i
Ġshe dding
ĠN ope
Ġbreat hed
ĠCorinth ians
y ne
ek i
B ull
Ġatt aching
reens hots
Ġanaly se
ĠK appa
Ġuns ustainable
Ġinter pol
ank y
he mer
Ġprot agonists
Ġform atted
ĠBry ce
ĠAch illes
ĠAb edin
sh ock
Ġb um
b os
qu a
ĠW arn
q t
ĠDi abetes
8 64
ĠIn visible
Ġvan ish
Ġtrans mitting
Ġmur ky
ĠFe i
Ġawa ited
ĠJur assic
umm ies
Ġmen acing
g all
C ath
B uilt
ild o
ĠV otes
Ġon t
Ġmun itions
ĠFre em
ÃŃ n
Ġdec ency
lo pp
ie ved
ĠG ord
Ġun thinkable
ĠNews week
Ġ3 21
He at
Ġpresent er
ji ang
Ġpl ank
ĠAval on
Ġben z
ĠR out
Ġslam ming
ĠD ai
ou ter
ĠCook ie
ĠAlic ia
ge y
Ġvan ity
Ġow l
á µ
t ested
ĠAw akens
Ġcan v
Ġblind ly
ĠRid ley
ĠEm ails
Requ ires
ĠSer bian
ograp hed
if rame
eter ia
Ġaltern ating
qu iet
Ġsoc iology
ĠUn lock
ĠCommun ism
Ġo ps
Ġatt ribution
Ġab duction
ĠAb ram
Ġsidel ined
ĠB OOK
Ġref ining
ĠFe eling
ĠOs lo
ĠPru itt
r ack
ang ible
Ġcaut iously
ĠM ARK
eed s
M ouse
ĠStep h
ĠP air
S ab
99 7
ĠBa al
B ec
Ġcomm a
ĠP all
ĠG ael
Ġmisunder stand
ĠP esh
Order able
Ġdis mal
ĠSh iny
% "
Ġreal istically
Ġpat io
ĠG w
ĠVirt ue
Ġexhaust ing
wh atever
oph ys
y ip
4 18
Ad just
ĠWa iting
ess on
ĠMaz da
ĠDo zens
Ġstream lined
Ġincompet ence
ĠM eth
Ġeth os
ON ES
Ġincent iv
Ġgr itty
ĠBut cher
Head er
Ġexp onential
Ã Ł
Ġcorrel ate
Ġcons ensual
s ounding
R ing
Orig in
Ġcon clusive
fe et
ac ly
ĠF ernandez
Buy able
Ġd ucks
aunt lets
Ġel ong
Ġ28 6
Ġsim ul
G as
ĠK irst
Ġprot r
ĠRob o
ĠAo E
op ol
Ġpsych ologically
sp in
ilater ally
ĠCon rad
W ave
44 1
ĠAd vertisement
ĠHarm on
ĠOri ental
is Special
Ġpresum ptive
Ġw il
ĠK ier
ne a
Ġp pm
Ġhar bour
ĠW ired
comp any
Ġcor oner
atur days
ĠP roud
ĠN EXT
ĠFl ake
val ued
ce iver
Ġfra ught
Ġc asing
Ġrun away
Ġg in
ĠLaure nt
ĠHar lem
ĠCur iosity
qu ished
Ġneuro science
ĠH ulu
Ġborrow er
Ġpetition er
ĠCo oldown
W ARD
Ġinv oking
conf idence
For ward
Ġst s
pop ulation
Delivery Date
Fil m
ĠC ov
quick Ship
quickShip Available
prim ary
isSpecial Orderable
inventory Quantity
channel Availability
BO X
ĠMulti player
ĠJen ner
77 8
ĠM d
Ġ~ /.
M N
Ġchild ish
Ġantioxid ant
ĠChrom ebook
Ġ27 4
Ġscreen play
Ġadvent urous
ĠRelations hip
respons ive
ming ton
Ġcorner stone
ĠF ey
F IR
Ġrook ies
ĠF eaturing
Ġorig inate
Ġelectro des
ant es
Ġscript ures
Ġgl ued
Ġdiscont ent
Ġaff licted
lay out
B rave
Ġm osa
ĠQuant ity
ĠH ik
w inner
H ours
Ġent ail
ĠCell s
olog ue
Ġv il
Ġpre acher
Ġdecor ative
d ifferent
Ġprejud ices
ĠSm oking
ĠNotting ham
so Type
Ġrhyth ms
ĠAl ph
bl ast
Ste el
ĠDaniel le
Ġstr ife
Ġrem atch
so DeliveryDate
ĠF ork
t rip
ol ulu
hes es
C G
ĠPOLIT ICO
ost a
ĠDr ift
é¾įå ¥
é¾įå¥ ĳå£«
Ġvet ting
ĠJin ping
ĠRec ession
Min or
ĠF raud
enf ranch
Ġconven ed
ĠNA ACP
ĠMill ions
ĠFarm ing
ĠW oo
ĠFl are
rit o
imm igrant
Ġvac ancy
ĠHE AD
ĠV aj
eg al
ĠV igil
Stud y
Ġru ining
Ġr acks
Ġhe ater
ĠRand olph
ĠBr ush
ĠT ir
Ø ¨
Ġc ov
% ]
Ġrecount s
ĠO PT
ĠM elt
Ġtr uce
Ġcas inos
Ġcrus ade
Ġcarn age
Ġstri pe
ĠK yl
Text ures
Ġ6 98
Ġpro clamation
Ġgood ies
Ġ........ ..
pro claimed
P olit
Ġtop ical
Ġspecial ize
ĠA min
g m
Ġanch ored
Ġbear ings
s ample
ĠHigh land
ĠAut ism
Ġmerc enary
Ġinterview er
L ER
ĠSom ers
Ġembry o
ĠAss y
Ġ28 1
ĠEd iting
ĠCh osen
6 60
Ġp ci
ĠThunder bolt
BI LL
Ġchuck led
jri wal
h of
Ġearth ly
() {
ind ependence
Ġdisp ers
ĠV endor
ĠG areth
Ġp als
P enn
ĠSub mit
ic um
Th u
Ġcl andestine
Ġcann ibal
ĠCl erk
E Stream
gal itarian
âĻ ¥
g ew
Ġhor rend
ĠL ov
ĠRe action
ocr in
Class ic
Ġecho ing
Ġdiscl osing
ĠIns ight
og un
ĠInc arn
upload s
pp erc
guy en
Ġ19 01
ĠB ars
68 7
Ġb ribes
ĠFres no
ur at
ĠRe ese
Ġintr usive
Ġgri pping
ĠBlue print
ĠR asm
un ia
man aged
ĠHeb do
Ġ3 45
Ġdec oding
Ġpo ets
Ġj aws
ĠF IGHT
am eless
ĠMead ows
ĠHar baugh
Inter view
ĠH osp
ĠB RA
Ġdelet ion
m ob
W alker
ĠMoon light
ĠJ ed
ĠSoph ia
Ġus ur
Ġfortun ately
ĠPut ting
ĠF old
Ġsan itation
Ġpart isans
IS ON
B ow
ĠCON C
ĠRed uced
ĠS utton
Ġtouch screen
Ġembry os
âĢ¢âĢ¢ âĢ¢âĢ¢
ĠK rug
com bat
ĠPet roleum
Ġam d
ĠCos mos
Ġpresc ribing
Ġconform ity
ours es
Ġplent iful
Ġdis illusion
ĠEc ology
itt al
Ġf anc
Ġassass inated
regn ancy
Ġperenn ial
ĠBul lets
Ġst ale
Ġc ached
ĠJud ith
ĠDise ases
All en
Ġl as
Ġsh ards
ĠSu arez
ĠFriend ship
inter face
ĠSupp orters
add ons
46 2
ĠIm ran
ĠW im
Ġnew found
ĠM b
An imal
Ġd arling
and e
Ġrh y
ĠTw isted
pos al
yn ski
Var ious
× ľ
ĠK iw
uy omi
Ġwell being
ĠL au
an os
Ġunm ist
Ġmac OS
Ġrest room
ĠOl iv
ĠAir ways
Ġtimet able
9 80
Ġrad ios
v oy
ias co
Ġcloud y
ĠDraw ing
Any thing
Sy ria
ĠH ert
st aking
Ġun checked
Ġb razen
ĠN RS
69 7
onom ic
est ablish
Ġl eng
Ġdi agonal
ĠF ior
L air
ĠSt ard
Ġdef icient
jo ining
be am
Ġomn ip
Ġbl ender
Ġsun rise
Mo ore
ĠF ault
ĠCost ume
ĠM ub
Fl ags
an se
Ġpay out
ĠGovern ors
ĠD illon
ĠBan ana
N ar
Ġtra iled
Ġimperial ist
um ann
ats uki
4 35
ĠRoad s
Ġsl ur
ĠIde ally
Ġt renches
C trl
Ġmir rored
ĠZ el
ĠC rest
Comp at
ĠRoll s
sc rib
ĠTra ils
omet ers
w inter
Ġimm ortality
il ated
Ġcontrad icts
un iversal
ill ions
ĠM ama
opt im
AT URE
Ġge o
et ter
ĠCar lo
4 24
Ġcanon ical
ĠStrongh old
n ear
Ġperf ume
Ġorche stra
od iac
Ġup he
Ġreign ing
vers ive
Ġc aucuses
ĠD EM
Ġinsult ed
Ġ---- --
ĠCr ush
Ġroot ing
ĠWra ith
Ġwh ore
Ġto fu
C md
ĠB ree
Ġ$ _
Ġr ive
ĠAd vertising
Ġw att
ĠH O
Ġpersu asive
ĠParam eters
Ġobserv ational
ĠN CT
ĠMo j
ĠSal on
Ġtr unc
Ġexqu isite
ĠMar a
Ġpo op
ĠAN N
Ex c
ĠWonder ful
ĠT aco
Ġhome owner
ĠSmith sonian
orpor ated
mm mm
Ġlo af
ĠYam ato
ĠInd o
Ġcl inging
Ã¡ s
Ġimm utable
h ub
Or ange
Ġfingert ips
ĠWood en
ĠK idd
ĠJ PM
ĠDam n
C ow
c odes
48 2
Ġiniti ating
ĠEl k
ĠCut ting
Ġabsent ee
ĠV ance
ĠLil ith
G UI
Ġobsc ured
Ġdwar ves
ĠCh op
ĠB oko
Val ues
Ġmult imedia
Ġbrew ed
Reg ular
CRIP TION
ĠMort al
Ġa pex
Ġtravel er
Ġbo ils
Ġspray ing
Rep resent
ĠStars hip
4 28
Ġdisappro val
Ġshadow y
Ġlament ed
ĠRe place
ĠFran Ã§
67 7
d or
Ġunst oppable
Ġcoh orts
gy n
ĠClass ics
ĠAm ph
Ġsl uggish
ĠAdd iction
ĠPad res
Ġins cription
Ġin human
min us
ĠJere miah
at ars
Ter ror
ĠT os
ĠSh arma
ast a
c atch
Ġpl umbing
ĠTim bers
Sh ar
H al
ĠO sc
Ġcou pling
hum ans
Ġsp onge
Ġid ols
ĠSp a
ĠAdv ocate
ĠBe ats
lu a
Ġtick ing
Ġload er
ĠG ron
8 10
Ġstim ulated
Ġside bar
ĠManufact urer
ore And
19 73
Ġpra ises
ĠFl ores
dis able
ĠElect rical
ra ise
E th
Ġmigr ated
Ġlect urer
K ids
ĠCa vern
Ġk ettle
Ġgly c
ĠMand ela
ĠF ully
å§ «
FIN EST
Ġsquee zing
ĠRy der
amp oo
oreAnd Online
Inst oreAndOnline
Buyable InstoreAndOnline
Ġcommem orate
ĠRamp age
Aust in
ĠSh roud
ĠRu ins
9 15
ĠK H
Ġwater front
ĠE SC
b aby
ĠC out
ĠEm blem
Ġequival ents
49 2
Un ique
ĠNiet zsche
brow ser
Ġim itation
ĠWere wolf
ĠKir in
ac as
' ,"
ĠÃ ¾
Review ed
Ġc unt
Ġvo ic
ĠLen ovo
Ġbond ed
48 1
Ġinhib itors
Ġendeav ors
ĠHav ana
ĠSt out
ĠJ olly
A ctor
*/ (
Ġoccur rences
ĠT ens
Incre ased
ĠACT ION
Ġ ãĢĮ
ĠRank ings
ĠB reat
Ġ30 9
D ou
Ġimpact ing
ĠDuc hess
pre fix
Q B
Ġsummon ing
Ġbest owed
ĠKe pler
ĠPOW ER
c ube
ĠK its
ĠG rip
Ġop ium
Ġrep utable
t oc
ich ael
ĠR ipple
Ġcaf Ã©
ĠZ oom
ĠBur ma
Ġwa ive
Ġst alls
Ġdem eanor
inc erity
Ġfluor ide
ĠSH OULD
Par is
Ġlong ing
Ġpl at
Ġgross ly
Ġbull s
Ġshowc asing
ex pected
ĠG addafi
engine ering
Re peat
ĠK ut
Ġconce ivable
Ġtrim med
osc ope
ĠCand idate
ĠT ears
rol og
Lew is
S UP
Ġroad map
Ġsal iva
Ġtrump et
Jim my
Ġmirac ulous
Ġcolon ization
Ġam put
ĠGN OME
ate ch
D ifferent
ĠE LE
ĠGovern ments
ĠA head
ãħĭ ãħĭ
word press
L IB
ĠIn clude
ĠDor othy
0 45
ĠColomb ian
Ġle ased
88 4
Ġde grading
ĠDa isy
i ations
Ġbapt ized
Ġsurn ame
co x
Ġblink ed
ãĥ ¢
Ġpoll en
Ġder mat
Ġre gex
ĠNich olson
ĠE ater
ç ľ
rad or
Ġnarrow er
Ġhur ricanes
Ġhalluc inations
r idden
ISS ION
ĠFire fly
Ġattain ment
Ġnom inate
Ġav ocado
ĠM eredith
Ġt s
Ġreve rence
Ġe uph
Ġcr ates
ĠT EXT
Ġ4 43
Ġ3 19
J SON
iqu ette
Ġshort stop
ic key
Ġpro pelled
Ġap i
ĠTh ieves
77 9
Ġovers aw
Ġcol i
ĠNic ola
Ġover cl
ik awa
ĠC yr
Ġ38 4
78 9
ĠAll ows
10 27
Det roit
TR Y
set up
ĠSocial ism
Sov iet
s usp
ĠAP R
ĠShut down
Ġal uminium
zb ek
ĠL over
GGGG GGGG
Ġdemocr acies
Ġ19 08
ĠMer rill
ĠFranco is
gd ala
Ġtraff ickers
ĠT il
ĠGo at
Ġsp ed
ĠRes erv
Ġpro d
55 2
Ġc ac
ĠUn iv
ĠSch we
Ġsw irling
ĠWild erness
ĠEgg s
Ġsadd ened
Ġarch aic
H yd
Ġexcess ively
B RE
Ġaer ospace
ĠVo ices
Cra ig
Ġign ited
In itially
ĠMc A
Ġhand set
Ġreform ing
Ġfrust rations
ĠDead pool
ĠBel ichick
ract or
ĠRagnar ok
ĠD rupal
ĠApp roximately
19 20
ĠHub ble
arm or
ĠSar as
ĠJon as
Ġnostalg ic
Ġfeas ibility
Sah aran
Ġorb iting
Ġ9 70
R u
Ġsh in
ĠInvestig ators
Ġinconsist encies
ĠP AN
B G
Ġgraz ing
Ġdetect ors
ĠStart up
ĠFun ny
ĠNa omi
Consider ing
Ġh og
ut f
ce mic
Ġfort ified
ĠFun ctions
Ġcod ec
nut rition
H at
" !
micro soft
55 8
ĠTh in
ĠA CE
Al ias
ĠO PS
p apers
P K
ãĢ İ
Ġimpro bable
N orthern
equ al
Ġlook out
Ġty res
ĠMod ified
ĠK op
Abs olutely
Ġbuild up
sil ver
Ġaud i
Ġgro tesque
ĠSab er
ĠPres byter
ON Y
Ġglac iers
ĠSho als
ĠK ass
ĠH RC
ĠNic ol
ĠL unch
ĠF oss
âĸ Ĵ
AD RA
ĠOne Plus
o ing
ground s
Ġincident al
Ġdatas ets
68 9
ĠClarks on
Ġassemb ling
ĠCorrect ions
Ġdrink ers
Ġqual ifiers
Ġle ash
Ġunf ounded
ĠH undred
Ġkick off
T i
Ġrecon cil
ĠGr ants
ĠCompl iance
ĠDexter ity
Ġ19 06
w arn
D allas
Max imum
n ard
av ia
be aut
ens itivity
tr ace
Ġpione ers
ĠF ract
ãĢ ı
Ġpre cept
Ġgloss y
ĠI EEE
Ac ross
Ġ6 80
S leep
che on
Ġsatir ical
ĠMin otaur
ĠCla ude
Ġr Ã©
ape go
Ġcar rot
ĠSem in
ino a
Ġz o
Ind ependent
Ġdiagn oses
ĠC ue
M AR
Ġrend ition
ĠK ik
Ġpath ology
Ġselect s
Link edIn
Ġass ay
ĠD res
Ġtext ual
post ed
IT AL
ĠM aul
N eal
Ġinter connected
Ġerr atic
ĠVir us
Ġ5 30
Ġenvironmental ists
ĠP helps
Ġeng agements
ĠIN ST
Ġeconom ical
nox ious
Ġg earing
izz y
Ġfavor ably
ĠMcG ill
T erm
Ġh anged
Ġball park
ĠRe yes
Ġbe ware
ĠP sal
ĠMass acre
q i
Ġin accessible
acly sm
Ġfr ay
ill ac
Ġbitter ly
ĠCert ification
Mich igan
Ġir respective
al ore
Em pty
Ġendorse ments
Ġund et
f g
equ ipped
Ġmerc iless
ĠC ust
Ġimm ature
Ġvou cher
ĠBlack well
Ñ ı
h awk
dis ciplinary
ile e
ĠMak oto
ĠD ude
ãĥĩ ãĤ£
Y ears
Ġin ver
Ġsh aman
ĠY ong
ip el
ell en
ĠCath y
br ids
Ġs arc
65 1
N ear
Ġground work
Ġam az
Ġ4 15
ĠHunting ton
hew s
ĠB ung
Ġarbit rarily
ĠW it
ĠAl berto
Ġdis qualified
best os
46 1
Ġp c
Ġ28 4
ro bat
Rob in
Ġh ugs
ĠTrans ition
ĠOcc asionally
Ġ3 26
ĠWh ilst
ĠLe y
Ġspaces hip
cs v
Ġun successfully
ĠA u
le ck
ĠWing ed
ĠGrizz lies
. ï¿½
Ġne arer
ĠSorce ress
ĠInd igo
El se
8 40
let es
Co ach
Ġup bringing
ĠK es
Ġseparat ist
Ġrac ists
Ġch ained
Ġabst inence
lear ning
Ġrein stated
Ġsymm etry
Ġremind ers
ĠChe vy
Ġm ont
Ġexempl ary
ĠT OR
Z X
Ġqual itative
ĠSt amp
ĠSav annah
ĠRoss i
Ġp aed
Ġdispens aries
ĠWall s
ĠCh ronic
Ġcompliment ary
ĠBeir ut
Ġ+ ---
igs list
Ġcrypt ographic
mas ters
ĠCap itals
Ġmax imal
Ġent ropy
Point s
Ġcombat ants
l ip
ĠGl ob
ĠB MC
ph ase
th ank
HT TP
Ġcomm uter
Ġ\( \
.. /
ĠReg ener
ĠDO I
ĠActiv ision
Ġsl it
os al
RE M
Ġch ants
Y u
Ke ys
Bre xit
ĠFor ced
Ari zona
Ġsquad ron
IS O
ĠMal one
Ġ3 38
Ġcontrast ing
Ġt idal
Ġlib el
Ġimpl anted
Ġupro ar
ĠC ater
Ġpropos itions
M anchester
ĠEuro s
it amin
G il
ĠEl ven
ĠSe ek
ĠB ai
Ġredevelop ment
ĠTown s
ĠL ub
! ",
al on
K rist
Ġmeas urable
Ġimagin able
Ġapost les
Y N
7 60
Ġster oid
Ġspecific ity
ĠL ocated
ĠBeck er
ĠE du
ĠDiet ary
uts ch
ĠMar ilyn
Ġbl ister
ĠM EP
ĠK oz
ĠC MS
y ahoo
ĠCar ney
Ġbo asting
ĠC aleb
By te
read s
ad en
Pro blem
ĠWood ward
S we
S up
ĠK GB
Set up
Ġtac it
Ġret ribution
Ġd ues
ĠM Ã¼
. ?
ä¸ Ń
p ots
Ġcame o
ĠP AL
educ ation
A my
like ly
g ling
Ġconstitution ally
ĠHam m
ĠSpe ak
Ġwid gets
br ate
Ġcra ppy
ĠI ter
Ġanticip ating
ĠB out
P ixel
ĠY ep
ĠLaur ie
Ġh ut
Ġbullet in
ĠSal vation
Ġch ats
ear able
Honest ly
AL TH
onse qu
c ult
isco very
ovy ch
Ġse lves
ĠSat oshi
S ounds
Ġconver gence
ĠRosen berg
19 74
Ġnas al
Ġfull est
Ġfer ocious
x us
ist e
AM S
Ġlobb ied
Ġso othing
ĠGun n
t oday
0 24
Ġinspir ational
ĠN BN
p b
g ewater
or ah
all owed
ĠCol iseum
Ġspecial izing
Ġinsane ly
ĠT ape
del ay
Ġt arn
ĠP ound
Ġmel anch
Ġdeploy ments
il and
Ġless en
Ġfur ry
ĠUE FA
Ġblood shed
ĠMe ier
ither ing
Ġhe irs
ĠJ aw
ax ter
ĠPublic ations
Ġal ters
int ention
ĠWinc hester
d etermination
ĠLif etime
th in
Mon ster
7 80
Ġapprox imation
Ġsuper markets
ĠSecond s
or os
h uge
Ġb ribe
ĠLIM ITED
un ed
Ġmis interpret
ĠIn jury
Ġ3 67
Ġthreshold s
ĠCarn ival
Ġgastro intestinal
Ġguid eline
Ġde ceived
f eatures
Ġpurported ly
ĠRon nie
ĠNew t
Ġsp acious
as us
Ġsuperhero es
ĠCyn thia
le gged
k amp
ch io
Ġth umbnail
ĠShir ley
ill ation
Ġshe ds
ĠZ y
E PA
Ġdam s
Ġy awn
n ah
ĠPe ggy
ĠE rie
ĠJu ventus
ĠF ountain
r x
don ald
al bum
ĠComp rehensive
Ġc aching
ĠU z
ulner ability
ĠPrinc iple
ĠJ ian
ing ers
cast s
ĠOs iris
ch art
t ile
ĠTiff any
ĠPatt on
ĠWh ip
Ġovers ized
J e
ĠCind erella
ĠB orders
ĠDa esh
M ah
Ġdog ma
Ġcommun ists
v u
Coun cil
Ġfresh water
Ġw ounding
Ġdeb acle
Ġyoung ster
Ġthread ed
ĠB ots
ĠSav ings
ãģ Ĥ
ol ing
oh o
Ġillum ination
M RI
Ġlo osen
tr ump
ag ency
ur ion
Ġmoment arily
ĠCh un
ĠBud apest
ĠAl ley
D isk
Ġaston ished
ĠCon quer
ĠAccount ing
h aving
ĠWe in
ĠAl right
Ġrev olver
Ġdel usion
Ġrelic s
Ġad herent
qu ant
Ġhand made
or io
Ġcomb ating
c oded
Ġquad ru
re th
N ik
ĠTrib al
ĠMyster ious
Ġin hal
ĠWin ning
ĠClass ification
ch anged
Ġun ab
Ġsc orn
icip ated
w l
ond uctor
Ġrein forcing
ĠChild hood
an ova
Ġadventure r
Ġdoctor al
ĠStrateg ies
Ġengulf ed
ĠEnc ounter
Ġl ashes
Crit ical
ric ular
ĠU TF
oci ation
check ing
ĠConsult ing
Run time
per iod
ĠAs gard
Ġdist illed
ĠPas adena
ĠD ying
ĠCOUN TY
Ġgran ite
Ġsm ack
Ġparach ute
ĠS UR
Virgin ia
ĠF urious
78 7
ĠO kin
Ġcam el
ĠM bps
19 72
ĠCh ao
ĠC yan
j oice
ef er
ĠW rap
ĠDeb ate
S eg
Ġfore arm
ĠIgn ore
Ġtim estamp
Ġprob ing
ĠNo on
ĠGra il
f en
Ġdorm ant
ĠFirst ly
ĠE ighth
ĠH UN
ĠDes ire
or as
Girl s
ĠDes mond
z ar
am ines
O AD
exec ute
Ġbo obs
ĠAT L
_ (
Chel sea
Ġmasturb ation
ĠCo C
Ġdestroy er
ĠCh omsky
Ġsc atter
ĠAss ets
79 6
ĠC argo
Ġrecept ive
ĠSc ope
Ġmarket ers
Ġlaun chers
Ġax le
ĠSE A
se q
ĠM off
f inding
ĠGib bs
Georg ia
extreme ly
N J
Ġlab orers
st als
Ġmed iation
ĠH edge
at own
Ġi od
des pite
v ill
J ane
ex istence
Ġcoinc ided
ĠUt ilities
ĠChe ap
Ġlog istical
Ġcul mination
ĠNic otine
p ak
F older
Ġrod ents
st uff
Ġlaw fully
Ġreper to
io ch
j j
Dial ogue
HH HH
lic tion
Look s
Ġ29 7
Ġtur rets
ĠAb andon
Ġinc ess
ĠTraff ord
Ġcur led
Ġprefer ring
Ġprivat ization
Ġir resist
ĠP anda
ĠSh ake
ĠMc Gr
ãĥ Ħ
und ers
Ġdiscrim inated
Ġbart ender
I LE
Atl antic
Ġprop ensity
ĠW iz
ĠG im
con ference
Ġrein forces
G h
w agon
Ġe erie
F al
Ġhug ged
rac ist
R IC
F u
Ġf iller
ĠSt ub
Ġeng raved
ĠWrest le
Ġimagin ative
ĠPe er
ĠFact ors
an us
ĠDrac ula
mon itor
Ġrou ters
ib ia
ĠBoo lean
end ale
ĠSl aughter
ĠSh ack
R FC
ĠSpiel berg
S ax
ĠPH OTO
ĠCl over
ĠR ae
Dep ending
ĠMem or
ar am
Ġpier ced
Ġcur tains
v ale
ĠInqu isition
ĠP oke
Ġforecast ing
Ġcompl ains
S ense
ĠHer mes
isc overed
Ġb ible
ĠMor ph
Ġg erm
78 5
D ON
Ġcon gen
Ġcr ane
ĠD PR
Ġrespect fully
R oom
ĠN aw
ĠDal ai
re ason
ĠAng us
Educ ation
ĠTitan ic
Ë ľ
Ġo val
un ited
Ġthird s
Ġmoist ur
ĠC PC
M iami
Ġtent acles
ĠPol aris
ex c
ex clusive
ĠPra irie
Ġcol ossal
ĠBl end
sur prisingly
ÃŃ s
Ġindo ctr
Ġbas al
ĠMP EG
und o
Spl it
Develop ment
Ġlan tern
19 71
Ġprov ocation
Ġang uish
ĠB ind
ĠLe ia
duc ers
ipp y
conserv ancy
Ġinitial ize
ĠTw ice
ĠSu k
Ġpred ic
Ġdi ploma
Ġsoc iop
Ing redients
Ġhamm ered
ĠIr ma
Q aida
Ġglim ps
ĠB ian
Ġst acking
Ġf end
gov track
Ġun n
dem ocratic
ig ree
Ġ5 80
Ġ29 4
Ġstraw berry
ID ER
Ġcher ished
ĠH ots
Ġinfer red
Ġ8 08
ĠS ocrates
O regon
ĠR oses
ĠFO IA
Ġins ensitive
Ġ40 8
Recomm end
ĠSh ine
Ġpain staking
UG E
ĠHell er
ĠEnter prises
I OR
ad j
N RS
L G
Ġalien ated
Ġacknowled gement
ĠA UD
ĠRen eg
Ġvou chers
Ġ9 60
Ġm oot
ĠDim ensions
Ġc abbage
B right
g at
ĠK lu
Ġlat ent
Ġz e
ĠM eng
Ġdis perse
Ġpand emonium
H Q
Ġvirt uous
ĠLoc ations
ee per
prov ided
Ġse ams
ĠW T
iz o
PR OV
Ġtit anium
Ġrecol lection
Ġcr an
Ġ7 80
ĠN F
49 1
64 2
p acking
59 8
text ure
Sp ider
fre edom
cipl ed
ĠTAM ADRA
âĻ ¦
aut hent
ĠW ANT
r ified
Ġr ites
Ġuter us
k iss
Ġâī ¤
Ġsk illet
Ġdis enfranch
ĠGa al
Comp an
Ġage ing
gu ide
B alt
Ġiter ator
Ġdiscretion ary
t ips
Ġprim ates
ĠTechn ique
ĠPay ments
az el
ĠR OCK
stant ial
0 60
Ġd mg
ĠJack ets
ĠPlay off
Ġnurs ery
ĠSy mb
art on
Ġannex ation
Color ado
Ġco ils
ĠSh oes
âĦ¢ :
ĠRo z
COM PLE
ĠEve rest
ĠTri umph
J oy
G rid
à ¼
process or
ĠPros per
ĠSever us
ĠSelect ed
r g
ĠTay yip
St ra
Ġski ing
Ġ? )
Ġpe g
Tes la
Ġtime frame
Ġmaster mind
ĠN B
scient ific
ĠSh it
gener ic
IN TER
N UM
Ġst roll
ĠEn ix
ĠM MR
ĠE MS
m ovie
Ĥ ª
Ġminim izing
idd ling
Ġilleg itimate
Ġprot otyp
Ġpremature ly
Ġmanual s
obb ies
ĠCass idy
D EC
des ktop
Ġaer os
Ġscreen ings
Ġdeb ilitating
ĠGr ind
nature conservancy
Ġf ades
ter mination
assets adobe
F actor
Ġdefinitive ly
P okÃ©
ap ult
ĠLaf ayette
C orn
ĠCor al
Ġstagn ant
T ue
Ġdissatisf action
G ender
Ġkid neys
ĠG ow
ĠDef eat
ĠAsh ton
Ġcart els
Ġfore closure
ĠExpl ore
stre ngth
ot in
Ġveterin arian
Ġf umble
Ġpar ap
ĠSt rait
r ils
Ġpr ick
ĠBerm uda
ĠAm munition
skin ned
Ġab ound
ĠB raz
Ġshar per
ĠAsc ension
Ġ9 78
Ġpreview s
Ġcommun ion
ĠX Y
Ġph ony
Ġnewcom er
Ġ3 32
." ,"
Ġredist ribution
Prot ect
ĠSo f
K al
Ġlip stick
w orst
Ġtang led
Ġretrospect ive
int eger
Ġvolunte ering
Ġ19 07
Ġ --------------------
ic hen
Ġunve iling
Ġsen seless
Ġfisher ies
\ -
Ġh inges
Ġcalcul us
My th
Ġund efeated
Ġoptim izations
Ġdep ress
Ġbill board
ĠY ad
ĠPy ramid
Is n
I de
Ġleg ion
ĠK ramer
ent anyl
Ġpenet rating
ĠHaw th
ĠPR ODUCT
ĠGer ard
ĠP act
ĠIn cluding
ĠEl ias
ĠEl aine
vis ual
Ġhum ming
Ġcond esc
ĠF asc
ä¸ Ĭ
Ġe galitarian
Ġdev s
ĠD ahl
O ps
D H
ĠB ounce
id ated
ald o
Ġrepublic an
Ġh amb
ĠS ett
ograph ies
CH APTER
Ġtrans sexual
Ġsky rocket
ans wer
Ġmark up
Ø ª
Ġhero ine
Comp are
ĠT av
Be ast
Ġsuccess ors
Ġna Ã¯ve
ĠBuck ley
st ress
me at
Ġdownload able
Ġindex ed
Ġsc aff
ĠL ump
ĠHom o
Stud io
In sp
Ġr acked
far ious
ĠPet ty
Ex ternal
Ġ19 09
W ars
com mit
put ers
Ġun ob
ĠEr r
ĠE G
ĠAl am
ĠSiber ia
ĠAtmosp heric
IS TER
ĠSatan ic
trans lation
ĠL oud
tra umatic
l ique
Ġreson ate
ĠWel ch
Ġspark ing
ĠT OM
t one
Ġout l
Ġhandc uffed
ĠSer ie
8 01
Ġland marks
ĠRee ves
Ġsoft ened
Ġdazz ling
ĠW anted
month s
Mag ikarp
Ġunt reated
ĠBed ford
M i
ĠDynam o
O re
79 5
Ġwrong ful
Ġl ured
Ġcort isol
Ġve x
d rawn
ile t
Download ha
ĠF action
Ġlab yrinth
Ġhij acked
w aters
er ick
Ġsuper iors
ĠRow ling
ĠGu inness
Ġt d
99 2
Ġune arthed
Ġcentr if
Ġsham eless
P od
ĠF ib
Ġ icing
Ġpredict or
Ġ29 2
fore station
con struct
C and
@ #
Ġag itated
Ġre pr
OV A
Ġkn itting
ĠLim a
Ġf odder
68 4
ĠPerson a
k l
7 01
Ġbreak up
á ¸
Ġapp alled
Ġantidepress ants
ĠSus sex
Har ris
ĠTher mal
ee ee
U pload
Ġg ulf
Ġdoor step
ĠSh ank
L U
ĠM EN
ĠP ond
s orry
Ġmis fortune
n ance
Ġb ona
M ut
Ġde graded
ĠL OG
ĠN ess
an imal
Ġa version
und own
Ġsupplement ed
ĠC ups
Ġ50 4
Ġdep rive
ĠSpark le
Å Ĥ
ĠMed itation
auth ors
ĠSab an
ĠN aked
air d
ĠMand arin
ĠScript ures
ĠPerson nel
ĠMahar ashtra
Ġ19 03
ĠP ai
ĠMir age
omb at
Access ory
Ġfrag mented
T ogether
Ġbelie vable
ĠGl adiator
al igned
ĠSl ug
M AT
Ġconvert ible
ĠBour bon
amer on
ĠRe hab
nt ax
Ġpowd ered
pill ar
Ġsm oker
ĠMans on
ĠB F
5 11
ĠGood ell
ĠD AR
m ud
g art
Ġob edient
ĠTrans mission
ĠDon ation
8 80
Ġbother ing
Material s
ãĤ ±
dest roy
Ġfore going
Ġanarch ism
ĠK ry
ice ps
Ġl ittered
ĠSch iff
Ġanecd otal
un its
Ġf ian
ĠSt im
ĠS OME
ĠInv aders
Ġbehaviour al
ĠVent ures
Ġsub lime
Ġfru ition
ĠPen alty
Ġcorros ion
¶ ħ
Ġlik ened
Ġbesie ged
ween ey
ĠCre ep
Ġlinem en
mult i
ic ably
ud der
Ġvital ity
Ġshort fall
ĠP ants
ap ist
H idden
ĠDro ps
med ical
Ġpron unciation
ĠN RL
Ġinsight ful
J V
ĠBe ard
ĠCh ou
Ġchar ms
Ġb ins
Ġamb assadors
ĠS aturdays
Ġinhib itor
ĠFr anch
6 01
', '
ĠCon or
art ney
ĠX peria
g rave
be es
ĠProtest ants
Ġso aking
ĠM andal
Ġph ased
Ġ6 60
Ġsc ams
Ġbuzz ing
ĠItal ians
ĠLoren zo
ĠJ A
Ġhes itated
Ġcl iffs
ĠG OT
ingu ishable
Ġk o
Ġinter ruption
Z ip
Lear ning
Ġundersc ores
ĠBl ink
K u
57 9
ĠAut ob
I RE
Ġwater ing
Ġpast ry
8 20
Ġvision ary
ĠTempl ar
awa ited
Ġpist on
Ġant id
current ly
Ġp ard
Ġw aging
Ġnob ility
ĠY us
Ġinject ing
f aith
ĠP ASS
å º
Ġret ake
ĠPR OC
Ġcat hedral
b ash
Ġwrest lers
Ġpartner ing
Ġn oses
Ġ3 58
Trans form
am en
Ġb outs
ĠId eal
ĠConstant in
Ġse p
ĠMon arch
att en
ĠPe oples
mod ified
Ġmor atorium
Ġpen chant
Ġoffensive ly
Ġprox ies
ok ane
ĠTaiwan ese
ĠP oo
ĠH OME
us ional
Ġver bs
ĠO man
vis ory
Ġpersu asion
Ġmult it
Ġsc issors
G ay
ow ay
oph ysical
l us
gn u
Ġap ocalyptic
Ġabsurd ity
Ġplay book
Ġautobi ography
I UM
Ġsne aking
ĠSim ulation
pp s
ell ery
Plan et
Ġright fully
Ġn iece
ĠN EC
ĠIP O
ĠDis closure
lean or
ous y
ST ER
Ġ28 2
Cru z
Ch all
64 3
ĠSurv ive
ĠF atal
ĠAm id
ap o
We apons
D EN
7 70
ĠGreen wald
Ġlin en
al os
Ġpollut ants
ĠPCI e
k at
Ġp aw
ĠK raft
C hem
ĠTermin ator
Ġre incarn
Ġ] [
ĠSe eds
Ġsilhou ette
ĠSt ores
Ġgro oming
ĠD irection
ĠIs abel
ĠBr idges
ðŁ ĳ
E ED
ĠM orsi
Ġval ves
ĠRank ed
ĠPh arma
ĠOrgan izations
Ġpenet rated
ĠRod ham
ĠProt oss
Ġove rest
Ġex asper
ĠT J
Ġ 000000
Ġtrick le
Ġbour bon
WH O
Ġw retched
Ġmicrosc opic
Ġcheck list
Ġad orned
R oyal
Ad minist
ĠRet irement
ĠHig hest
We ather
ile ge
Ġincre ments
ĠC osponsors
Ġmas se
ĠS inn
r f
Ġh ordes
as sembly
75 4
ĠNat asha
ĠTY PE
ĠGEN ERAL
Ġarr anging
Ġ40 7
l ator
Ġg lean
Ġdisc redited
Ġclin icians
UN E
Ġachie ves
ĠEm erson
com plex
= [
Ġprincip ally
Ġfra il
p icked
Ġthan king
Ġre cl
ĠL AST
Ġsupp ressing
il ic
Ġantidepress ant
ĠLis bon
Ġth or
Ġsp a
Ġking doms
ĠPear ce
em o
Ġpl ung
Ġdiv est
Ġ ********************************
b is
osp els
ad r
Sp irit
hall a
P ink
end ez
Ġresurrect ed
esc ape
ĠRosen stein
Ġge ological
Ġnecess ities
Ġcarn iv
ĠE lys
ĠBar ney
Ġ29 6
dig y
ST ON
D OWN
Ġmil estones
Ġk er
Ġdismant ling
Ġre prim
Ġcross ings
19 45
Ġpatri archy
Ġblasp hemy
Ġ3 59
met ry
ĠOb esity
ĠDiff erences
bl ocking
ãĥķ ãĤ¡
ich ita
ĠSab ha
ph alt
ĠCol o
ual a
effic ients
ĠMed ina
con sole
55 7
ĠHann ibal
ĠHab it
ĠF ever
Ġthen ce
Ġsyn agogue
Ġessential s
Ġw ink
ĠTr ader
ID A
ĠSp oiler
ĠIceland ic
ĠHay ward
Ġpe ac
Ġmal ice
Ġflash back
Ġth w
Ġlay offs
L iquid
Ġtro oper
Ġh inge
ĠRead ers
Ph ill
ĠB auer
Cre ated
Ġaud its
ac compan
Ġunsus pecting
ier a
6666 6666
Ġbro ch
Ġapprehend ed
ĠM alk
cer ning
ĠCod ex
O VER
M arsh
ĠD eng
ĠExp ression
Ġdisrespect ful
Ġasc ending
t ests
ĠPlaint iff
ster y
ĠAl ibaba
din and
ĠDem psey
Applic ations
mor al
Ġthrough put
Ġquar rel
Ġm ills
Ġhe mor
ĠC ASE
terror ist
st im
ifest yle
ro zen
CE PT
Ar k
u ci
lect ic
Ġirrit ating
she ets
A y
Ġrede emed
Ġhorn y
ĠTe ach
ĠS ear
dem ocracy
4 65
ĠRest ore
Ġstand by
ĠP is
iff in
Ġsleep y
Ġextr ater
Ġcompl iments
Fram eworks
Ġinstall s
Ġb anging
sur face
found land
Ġmetaph ysical
Ġ28 3
oul s
dev ices
Ar gs
ĠSac rifice
ĠMcC orm
es on
Cons ervative
ĠM ikhail
see ing
is ively
ĠRo oms
ĠGener ic
Ġenthusi astically
Ġgri pped
Ġcomed ic
ĠElectric ity
Ġgu errilla
Ġdec oration
ĠPerspect ive
Ġconsult ations
Ġun amb
Ġplag iar
Ġmagic ian
Ġe rection
ĠTour ism
or ied
ro xy
11 00
T am
Ī è
Î ³
× ª
ĠPred ators
Nit rome
Ġtelesc opes
project s
Ġun protected
Ġst ocked
ĠEnt reprene
nex pected
Ġwast ewater
V ill
Ġint imately
Ġi Cloud
ĠConst able
Ġspo of
Ġne farious
Ġfin s
Ġcens or
ĠMod es
ĠEs per
ar bon
Ġinter sections
Ġlaud ed
Ġphys i
Ġgener ously
ĠThe Nitrome
ĠTheNitrome Fan
Ġar isen
ĠÙ Ī
Ġg lands
ĠPav ilion
ĠGu pta
Ġuniform ly
Ġr amps
ri et
ĠWH EN
ĠVan essa
Ġrout ed
Ġlim p
ĠC PI
p ter
int uitive
Ġv aping
Ġexperiment ed
ĠOlymp us
ĠAm on
Ġsight ing
Ġinfiltr ate
ĠGentle man
Ġsign ings
ĠMe ow
ĠNav igation
che cks
4 33
Ġel apsed
ĠBulg arian
esp ie
ĠS OM
d uring
Ġsp ills
anc a
ĠPly mouth
M AL
Ġdomest ically
ĠWater gate
ĠF AM
k illed
ed ited
ĠYour self
Ġsynchron ization
ĠPract ices
ST EP
Ġgen omes
ĠQ R
not ice
Ġloc ating
z in
Ġ3 29
al cohol
Ġk itten
V o
Ġr inse
Ġgrapp le
ĠSc rew
ĠD ul
A IR
Ġle asing
ĠCaf Ã©
Ġro ses
ĠRes pect
Ġmis lead
Ġperfect ed
Ġnud ity
Ġnon partisan
ĠCons umption
Report ing
Ġnu ances
Ġdeduct ible
ĠSh ots
Ġ3 77
Ġæ ľ
ano oga
Ben ef
ĠB am
ĠS amp
if ix
Ġgal van
ĠMed als
rad ius
Ġno bles
Ġe aves
igr ate
K T
ĠHar bour
u ers
Ġrisk ed
re q
Ġneuro t
get table
ain a
Rom ney
Ġunder pin
Ġlo ft
ĠSub committee
ĠMong ol
b iz
Ġmanif ests
ass isted
ĠG aga
Ġsy nergy
Ġreligious ly
ĠPre f
ĠG erry
T AG
ĠCho i
4 66
beh ind
ĠO u
Gold Magikarp
Ġhemor rh
R iver
Ġtend on
Ġinj ure
ĠF iona
Ġp ag
Ġag itation
|| ||
ur an
ĠE SA
Ġest eem
Ġdod ging
Ġ4 12
r ss
Ġce ases
ex cluding
Ġint akes
Ġinsert s
Ġemb old
ĠO ral
up uncture
4 11
ĠUn ified
ĠDe le
Ġfurn ace
ĠCoy otes
ĠBr ach
L abor
Ġhand shake
Ġbru ises
Gr ade
éĹ ĺ
ĠGram my
ile en
St ates
ĠScandinav ian
ĠKard ash
8 66
Ġeffort lessly
ĠDI RECT
ĠTH EN
ĠMe i
ert ation
19 68
Ġgro in
w itch
Requ irements
98 5
Ġroof s
Ġest ates
ĠH F
Ġha ha
Ġdense ly
ĠO CT
Ġpl astics
Ġincident ally
ĠTr acks
ĠTax es
Ġch anted
Ġforce ful
ĠBie ber
ĠK ahn
K ent
ĠC ot
lic ts
F ed
Ġhide ous
ĠVer d
ĠSynd icate
ĠIl legal
J et
ĠD AV
re asonable
c rew
Ġfundamental ist
Ġtruth ful
ĠJ ing
Ġl il
Ġdown ed
Ġen chanted
ĠPolic ies
ĠMcM aster
ĠH are
ides how
Ġpar ams
en cers
gorith m
Ġallow ances
Ġturb ulent
Ġcomplex ities
ĠK T
Ġ3 37
ĠGen etic
F UN
D oug
t ick
Ġg igs
ument hal
Ġpatriarch al
Ġcal c
, ...
Ġc out
ĠGu an
Ġpath ological
ĠR ivals
Ġunder rated
Ġflu orescent
ĠJ iu
arna ev
ĠQu an
Ġ4 29
Ġ à¨
M ario
Con struct
ĠC itation
ĠR acial
ĠR SA
ĠF idel
Ġ3 95
Person ally
C ause
Ã »
rad ical
in en
Ġvehement ly
ĠPap a
Ġintern ship
Ġfl akes
ĠRe ck
Luck ily
B ra
20 20
rav ings
R N
W onder
Ser iously
Ġre usable
Ġpoll uted
ĠP eng
le igh
ind le
Ġcircuit ry
ĠMad onna
ĠB ART
Res idents
att ribute
Phil adelphia
Cl ub
Ġplan ner
Ġfr antically
Ġfaith fully
ĠTerrit ories
ĠL AT
ĠAnders en
an u
ĠP ARK
ĠS ora
i age
ĠPlay offs
ĠG CC
4 27
Ġab norm
ĠL ever
Ġdisob edience
As ync
ĠShe a
V ert
Ġsk irts
ĠSaw yer
x p
Ġwors ening
Ġsc apego
ĠAng le
oth al
Ġtro ve
ĠSt y
ĠN guyen
mar ine
ide on
Dep ths
Bl og
ĠIll uminati
Ġtract s
Ġorgan ise
Ġo str
F s
Ġlever aging
ĠD aredevil
as ar
Ġl ang
Ġex termin
urs ions
ĠRom o
ãĤ¤ ãĥĪ
Ġcont ended
Ġencounter ing
ĠTable t
ĠAltern ate
sk ill
Ġswe ets
Ġco hesive
cap acity
Ġrep ud
Ġl izard
ro o
Ġpilgr ims
ĠR uff
ĠInstr ument
ĠLog o
uit ous
E H
Ġsales man
Ġank les
L ed
ĠPat ty
ud os
Own er
Ġdiscrep ancies
k j
M U
Ġuncond itional
Dragon Magazine
i ard
O ak
ĠConvers ation
be er
ĠOs aka
D elta
us ky
Ġsecret ion
Ġpl aza
Ġm ing
Ġde pletion
ĠM ous
ĠI TS
ĠH imal
ĠFle ming
Ġcyt ok
ĠH ick
Ġbat ters
ĠInt ellectual
6 75
Ã© r
IS ION
ĠQu entin
ĠCh apters
ih adi
Ġco aster
WAY S
ĠL izard
ĠY or
and ering
S kin
ha ust
ab by
Ġportray ing
Ġwield ed
d ash
Ġprop onent
Ġr ipple
Ġgrap hene
Ġfly er
Ġrec urrent
Ġdev ils
Ġwater fall
æĺ ¯
go o
Text Color
Ġtam pering
IV ES
TR UMP
ĠAb el
ĠS AL
ĠHend ricks
ĠLu cius
b ots
Ġ40 96
IST ORY
Gu est
ĠN X
in ant
Ben z
ĠLoad ed
ĠCle ver
t reatment
Ġta vern
Ġ3 39
ĠT NT
ific antly
Tem perature
F el
Ġunder world
ĠJud ges
Ġ< +
Ġst ump
Ġoccup ancy
Ġab er
ĠF inder
) ",
ĠN unes
res et
in et
ect omy
Ġwell ness
ĠP eb
quart ered
and an
Ġneg atives
ĠTh iel
ĠCl ip
ĠL TD
Ġbl ight
Ġreperto ire
K yle
Ġqu er
ĠC es
Ġha pl
98 9
ĠTh ames
isc opal
Des k
ivari ate
ĠEx cellence
found ation
Ġâ ĩ
X i
Ġmyster iously
esty les
Ġper ish
ĠEng els
ĠDE AD
09 0
}} }
ĠUn real
Ġrest less
ID ES
orth odox
ĠInter mediate
Ġdin ners
ĠTr out
ĠSe ym
ĠHall s
og ged
Ġtraged ies
Ġdid nt
67 6
Ġail ments
Ġobserv able
ĠV ide
ad apt
ĠD usk
Ġprofessional ism
ĠPres cott
ĠInd ies
p ox
ĠMe hran
W ide
Ġend emic
ĠPar an
B ird
Ġped als
ĠI U
ĠAdam ant
ĠH urt
Ġcorrel ates
urd en
Ġspons oring
cl imate
ĠUnivers ities
ĠK not
enn es
ĠDam ian
ĠAx el
S port
Ġbar b
ĠS no
sh own
ste en
ud ence
Ġnon violent
Ġhom ophobia
Ġbiom ass
ĠDet ail
Ġsrf N
ĠT une
accompan ied
I ENCE
Al bert
ĠMong o
z x
ĠCer berus
or bit
c ens
Ġsl ay
SH ARE
H Y
Ġb rawl
ĠPro be
Ġnonex istent
ĠClare nce
ĠBlack burn
Ġport als
ĠR ita
ĠRem ain
ĠLe vant
Ġtrick ed
ĠF erry
aver ing
ĠStraw berry
ĠAn swers
Ġhorrend ous
ĠA man
Supp lement
ĠT oad
Ġpe eled
Ġman oeuv
ĠU zbek
mond s
ĠH ector
Ġ40 2
pe es
fix es
Ġd j
Ġres umes
Ġaccount ant
Ġadvers ity
Ġham pered
ĠL arson
Ġd oping
part s
H ur
Ġbe arded
Ġy r
ĠPlug in
å¥ ³
Ġ/ **
rol ley
Ġwaters hed
ĠSub mission
if lower
AS C
Ġcho ir
Ġsculpt ures
m A
incre asing
ai i
Ġsne akers
Ġconfront s
ĠEle phant
ĠEl ixir
Ġrec al
ĠT TL
w idget
ĠW ax
ĠGr ayson
Ġha irst
Ġhumili ated
ĠWAR N
app iness
ĠT TC
F uel
Ġpol io
Ġcomplex es
Ġbab e
ĠX IV
P F
). [
P arts
Ġ4 35
M eg
ĠY ards
ĠAL P
Ġy ells
Ġprin ces
Ġbull ies
ĠCapital ism
ex empt
FA Q
ĠSp onge
ĠAl a
Ġpleas antly
Ġbu f
Ġden ote
Ġunp ublished
Ġkne eling
asc a
Ġl apse
al ien
99 4
Ġrefere es
ĠLaw yers
S anta
Ġpuzz ling
ĠProm etheus
ĠPh araoh
ĠDel ay
Ġfacilit ates
ĠC ES
Ġjew els
Ġbook let
ond ing
Ġpolar ization
ĠMor an
ĠSal ad
ĠS OS
ĠAdv ice
PH OTOS
IC AN
iat ures
ex press
ĠWonder land
ĠC ODE
ĠCL ASS
9 75
Ġg rep
ĠD iesel
ĠGl ac
! ?"
Ġr m
o ine
disc rimination
ĠN urse
m allow
Ġv ortex
ĠCons ortium
Ġlarge Download
stra ight
augh lin
G rad
Ġpublic ized
ĠW aves
ĠRed d
Ġfest ivities
ĠM ane
ar ov
Ġfleet ing
ĠDr unk
ug en
C ele
Ġchromos omes
ĠD OT
-+-+ -+-+
Ġbus iest
ĠBe aver
Sy rian
ĠK yr
k as
ĠCross Ref
19 50
76 01
Ġrepe aling
ĠWin ners
ĠMac ro
ĠD OD
bl ance
S ort
64 1
Ġmet re
ĠD irk
Ġgo ggles
Ġdraw backs
Ġcomplain ant
Ġauthor izing
Ġantit rust
oper ated
Ġm ah
Ġexagger ation
Am azing
ĠSer aph
Ġha ze
w ow
Ġextingu ished
Ġcan yon
ĠB osh
Ġv ents
Ġsc rape
Cor rect
4 26
Ġav g
Dem and
ĠâĪ ¼
Ġmicrobi ota
"} ],"
ĠSt ev
B io
ĠPlan es
Ġsuggest ive
Ġdec ipher
ĠRefuge e
ĠKe jriwal
ĠGreen peace
Ġdecl ass
ĠSound ers
Ġth o
Ġdec rypt
Ġbr ushing
ĠJane iro
ip op
S i
8 77
ĠGeoff rey
Ġc pu
ĠHaz el
Ġview points
Ġcris py
ĠNot ification
Ġsold er
ĠMod est
ĠHem isphere
Ġcass ette
in cludes
Ġident ifiers
ĠC ALL
in cent
T odd
ĠSwe ep
Ġ3 34
b oss
Ġsm ir
gin x
Ġtown ship
Ġg rieving
ĠMos que
Net flix
AS ED
ĠMillenn ials
oc om
19 67
Ġbold ly
s leep
Ġes che
arij uana
Ġsw irl
ĠPen al
Ġneglig ent
ĠStephen son
K ER
ĠZ oro
ris is
Ġlocal ization
ĠSeym our
ĠAng lic
red itation
prot ection
ĠPa ige
Ġo mit
ĠR ousse
ĠT ub
Ġinv itations
t ty
Ġm oss
ph ysical
C redits
Ġan archy
Ġchild care
Ġl ull
ĠM ek
ĠL anguages
lat est
ĠSan ford
Ġus ability
Ġdiff use
ĠD ATA
Ġsp rites
ĠVeget a
ĠProm otion
ãĥ¼ ãĤ¯
rict ing
z ee
Tur kish
ĠTD s
pro ven
57 1
Ġsmug glers
707 10
Ġreform ed
ĠLo is
Ġun fl
ĠWITH OUT
ĠReturn ing
ann ie
ĠTom as
Fr anc
ĠProf it
ĠSER V
ĠR umble
ik uman
es an
Ġt esters
Ġgad get
Ġbrace let
ĠF SA
comp onent
Ġparamed ics
Ġj an
ĠRem em
ĠSk inner
Ġl ov
ĠQu ake
rom a
Ġfl ask
Pr inc
Ġover power
Ġlod ging
ĠK KK
ret te
Ġabsor bs
w rote
Ġ ,"
K ings
ĠH ail
ĠFall ing
xt ap
ĠHel ena
ire ns
L arry
Ġpamph let
ĠC PR
G ro
ĠHirosh ima
Ġhol istic
". [
Ġdet achment
Ġas pire
Ġcompl icit
ĠGreen wood
Ġresp awn
ĠSt upid
ĠFin ished
f al
b ass
Ġab hor
Ġmock ery
ĠFe ast
VID EO
Ġcon sec
ĠHung ry
P ull
ĠH ust
it ance
? ãĢį
) --
ĠPar allel
con v
4 69
ha ar
w ant
P aper
m ins
ĠTor o
ĠTR UMP
ĠR ai
D W
ĠW icked
ĠL ep
Ġfun ky
Ġdetrim ent
ios is
ache v
Ġde grade
im ilation
Ġret ard
Ġfrag mentation
Ġcow boy
ĠY PG
ĠH AL
Parent s
ĠS ieg
ĠStra uss
ĠRub ber
× Ĳ
Fr ag
Ġp t
Ġoption ally
ĠZ IP
ĠTrans cript
ĠD well
88 2
M erc
ĠM OT
ãĥ¯ ãĥ³
Ġhun ts
Ġexec utes
In cludes
Ġacid ic
ĠRespons ibility
ĠD umb
we i
And erson
ĠJas per
ight on
abs olutely
Ad ult
Ġpl under
Mor ning
ĠT ours
ĠD ane
Î º
ĠT EST
ĠG ina
Ġcan ine
aw an
Ġsocial ists
ĠS oda
Ġimp etus
ĠSupplement ary
oli ath
ĠKinn ikuman
mitted ly
second s
Ġorganis ers
Ġdocument aries
Vari able
GRE EN
Ġres orts
Ġbr agging
Ġ3 68
Art ist
w k
bl ers
Un common
ĠRet rieved
Ġhect ares
Ġtox in
r ank
Ġfaith s
ĠG raphic
Ġve c
ĠL IA
Af rican
Ġard ent
end iary
L ake
ĠD OS
cient ious
ĠOk awaru
ĠAll y
ĠTim eline
D ash
ĠI c
contin ue
Ġt idy
Ġinstinct ively
ĠP ossibly
ĠOut door
ĠWould n
Ġl ich
ĠBr ay
ĠA X
ĠÃ ī
Ġ+ #
\ '
Direct ory
ab iding
Ġf eral
ic ative
but t
Ġper verse
S alt
Ġwar ped
Ġnin eteen
Ġcabin ets
Ġsrf Attach
ĠSl oan
Ġpower ing
reg ation
F light
se vere
Ġst ren
Ġc og
ap ache
Ġâ Ŀ
Ġcaf eteria
p aces
ĠGrim oire
uton ium
Ġr aining
Ġcir cling
Ġlineback ers
c redit
Ġrep atri
ĠCam den
lic ense
Ġly ric
Ġdescript or
Ġval leys
Ġre q
Ġback stage
ĠPro hibition
ĠK et
Op ening
S ym
æĸ ¹
Ġserv ings
Ġoverse en
Ġaster oids
ĠMod s
ĠSpr inger
ĠCont ainer
è »
ĠM ens
Ġmult im
Ġfire fighter
pe c
Ġchlor ine
Ð ¼
end i
Ġsp aring
Ġpolyg amy
ĠR N
ĠP ell
Ġt igers
Ġflash y
ĠMad ame
S word
Ġpref rontal
Ġpre requisite
uc a
Ġw ifi
Ġmiscon ception
Ġharsh ly
ĠStream ing
ot om
ĠGiul iani
foot ed
Ġtub ing
ind ividual
z ek
n uclear
m ol
Ġright ful
49 3
Ġspecial ization
Ġpassion ately
ĠVel ocity
ĠAv ailability
T enn
Ġl atch
ĠSome body
Ġhel ium
cl aw
Ġdi pping
XX X
Ġinter personal
7 10
Ġsub ter
Ġbi ologists
ĠLight ing
Ġopt ic
Ġden im
end on
ĠC orm
Ġ3 41
ĠC oup
Ġfear less
Ġal ot
ĠCliff ord
ĠRun time
ĠProv ision
up dated
lene ck
Ġneur on
Ġgrad ing
ĠC t
sequ ence
in ia
con cept
Ġro aring
ri val
ĠCaucas ian
Ġmon og
key es
Ġappell ate
Ġlia ison
EStream Frame
ĠPl um
! .
Ġsp herical
Ġper ished
Ġbl ot
Ġben ches
Ġ4 11
Ġpione ered
Ġhur led
Jenn ifer
ĠYose mite
Ch air
Ġreef s
Ġelect or
ĠAnt hem
65 2
Ġun install
Ġimp ede
Ġbl inking
Ġgot o
Dec re
A ren
Ġstabil ization
ĠDis abled
ĠYanuk ovych
Ġoutlaw ed
ĠVent ura
ten ess
Ġplant ation
Ġy acht
ĠHu awei
Ġsol vent
Ġgr acious
Ġcur iously
Ġcapac itor
Ġc x
ĠRef lex
Ph ys
ĠC f
pt in
cons ervative
Ġinv ocation
c our
F N
ĠNew ly
H our
As ian
ĠLe ading
ĠAer ospace
An ne
Ġpre natal
Ġdeterior ating
H CR
ĠNorm andy
ol ini
ĠAm bro
9 10
Ġset backs
ĠT RE
Ġs ig
ĠSc ourge
59 7
79 8
Game play
Ġm sec
M X
Ġprice y
ĠL LP
aker u
Ġover arching
ĠB ale
Ġworld ly
Cl ark
Ġscen ic
Ġdisl iked
ĠCont rolled
T ickets
ĠE W
ab ies
ĠPl enty
Non etheless
Ġart isan
Trans fer
ĠF amous
Ġinf ield
ble y
Ġunres olved
ĠML A
ãĤ Ĥ
Cor rection
Ġdemocr at
ĠMore no
ro cal
il ings
Ġsail or
Ġr ife
h ung
Ġtrop es
Ġsn atched
ĠL IN
ĠB ib
ES A
ĠPre v
ĠCam el
run time
Ġob noxious
4 37
Ġsum mers
Ġunexpl ained
ĠWal ters
cal iber
Ġg ull
ĠEnd urance
ä½ ľ
Ġ3 47
Ir ish
Ġaer obic
Ġcr amped
ĠHon olulu
à ©
us erc
ec ast
AC Y
ĠQu ery
ãĤ¹ ãĥĪ
Bet a
Ġsuscept ibility
ĠSh iv
ĠLim baugh
ĠÃ ĸ
ĠN XT
ĠM uss
ĠBrit ons
ES CO
EG IN
Ġ% %
Ġsec ession
ĠPat ron
ĠLu a
n aires
ĠJPM organ
us b
ocy te
Ġcouncill ors
ĠLi ang
f arm
Ġnerv ously
Ġattract iveness
ĠK ov
j ump
Pl ot
Ġst ains
ĠStat ue
ĠApost les
he ter
ĠSUP PORT
Ġoverwhel m
Y ES
Ġ29 1
d ensity
Ġtra pping
M it
Ġf ide
ĠPam ela
atl antic
Dam n
Ġp ts
OP A
Ġserv icing
Ġoverfl owing
ul o
ĠE rit
t icket
light ing
ĠH mm
ãĥ¼ ãĥ«
im oto
Ġchuck le
4 23
ãģ ķ
sh ape
Ġque ues
Ġanch ors
ãĤ¼ ãĤ¦ãĤ¹
F er
Ġaw oke
Ġ6 66
h ands
Ġdiver gence
Ġ50 5
T ips
Ġdep ot
Ġske w
ĠDel iver
op ot
Ġdiv ul
ĠE B
uns igned
ĠUn i
X box
Ġfor ks
Ġ7 02
å ¯
Ġpromot ers
ĠV apor
Ġlev ied
sl ot
Ġpig ment
Ġcyl inders
C RE
Ġsn atch
Ġperpet ually
Ġl icking
ĠFe et
ĠKra ken
ĠHold en
ĠCLS ID
m r
Ġproject or
Ġden otes
Ġchap el
ĠTor rent
b ler
R oute
ĠDef endant
ĠPublisher s
ĠM ales
ĠInn ov
ĠAg ility
rit er
ty mology
st ores
L ind
Ġf olly
ĠZur ich
B le
Ġnurt ure
Ġcoast line
uch in
D omin
Ġfri vol
ĠCons olid
res ults
M J
Ġphyl ogen
Ġha uled
ĠW iley
ĠJess ie
ĠPrep are
ĠE ps
Ġtreasure r
I AS
Ġcolon ists
Ġin und
ĠWW F
ĠCon verted
6 000
out side
ĠApp earance
ĠRel ic
ĠM ister
s aw
Ġresult ant
Ġadject ive
ĠLaure l
ĠHind i
b da
Pe ace
Ġreb irth
Ġmembr anes
Ġforward ing
Ġcoll ided
ĠCar olyn
K ansas
5 99
ĠSolid GoldMagikarp
Be ck
Ġstress ing
ĠGo o
ĠCooper ative
Ġf s
ĠAr chie
L iter
ĠK lopp
J erry
Ġfoot wear
War ren
Ġsc ree
h are
Under standing
P ed
Ġanth ology
ĠAnn ounce
M ega
Ġflu ent
Ġbond age
ĠDisc ount
il ial
C art
ĠNight mares
Sh am
ĠB oll
uss ie
H ttp
Atl anta
Ġun recogn
ĠB id
Ġunder grad
Ġforg iving
ĠGl over
AAAA AAAA
4 45
V G
pa io
kill ers
Ġrespons ibly
Ġmobil ize
Ġeffect ed
ĠL umin
Ġk ale
Ġinfring ing
ann ounced
Ġf itt
b atch
ĠT ackle
ĠL ime
ĠAP P
uke mia
Ġrub y
Ġex oner
ĠCas ual
0 70
Ġpel vic
Ġautom ate
ĠK ear
ĠCoast al
Ġcre ed
Ġbored om
ĠSt un
ri ott
Ĥ İ
Ġregener ate
Ġcomed ians
ĠOP ER
Sp ons
id ium
on is
L ocated
05 7
Ġsusp ense
ĠD ating
C ass
Ġneoc ons
ĠShin zo
Ġaw oken
ch rist
ĠMess ages
att led
ĠSpr ay
ĠSp ice
C W
Ġshield ing
ĠG aul
Am id
Ġparam ilitary
Ġmult if
ĠTan ner
il k
Ġgodd amn
g ements
Ġbe friend
m obi
Ġ3 88
fold er
acc a
Ġins in
g ap
N ev
fif th
Ġpsychiat ry
b anks
TH IS
Ġhar b
ac qu
Ġfac ade
ĠPower Point
80 3
Ġbl uff
Sh ares
Ġfavor ing
El izabeth
Ãį Ãį
Ġr anger
77 2
ĠAr che
h ak
ĠGen etics
ĠF EMA
Ġev olves
Ġest e
ĠP ets
ĠM Ã©
ĠInterest ing
ĠCanter bury
ch apter
ĠStar fleet
Sp anish
Ġdraw back
ĠNor wich
9 70
n orth
ag anda
Ġtransform ative
ram ids
bi ology
ad ay
Ġpropag ation
ĠGam ma
ĠDen ise
ĠCalcul ator
ent imes
ĠB ett
Ġapp endix
ĠHD D
AK ING
Ġst igmat
Ġhol ster
Ġord inarily
Ch ance
ĠCont rary
Ġad hesive
Ġgather s
6 12
re au
ony ms
ew ays
Ġindu ces
Ġinterchange able
se m
Wh it
Ġtr ance
Ġincorpor ation
ĠExt ras
Fin ancial
Ġawkward ly
ĠStur geon
ĠH Y
Norm ally
ĠEnd ing
ĠAss ist
enc rypted
Ġsub jug
Ġn os
Ġfan atic
C ub
C U
?" .
Ġirre versible
å Ĥ
03 1
ĠH AR
sp read
ul ia
= $
Sc ope
L ots
Ġlif estyles
ol on
Ġf eds
Ġcongrat ulate
web kit
Ġindist inguishable
ĠSw ing
Ġcommand ments
qu ila
ab ella
m ethyl
ann abin
Ġo vere
Ġlob ster
ĠQU EST
ĠCONT IN
bern atorial
:::: ::::
ĠTra ve
ĠSam oa
AN I
75 2
Ð ´
userc ontent
ĠMod erate
y eah
ĠK itt
Ġwe e
Ġstuff ing
ĠInter vention
ĠD ign
Ġware houses
ĠF iji
Ġpel lets
Ġtake away
ĠT ABLE
ĠClass ical
col lection
Ġland fall
ĠMus cle
Ġsett les
ĠAD V
Ġ3 44
L aura
Ġf ared
ĠPart ial
4 36
oss ibility
ĠD aly
ĠT arant
ĠFu ji
am l
c ence
55 1
ĠProced ures
ĠO CD
ĠU D
t in
Q UI
ach o
4 38
Ġgl itches
Ġenchant ment
Ġcalcul ates
IR O
ĠH ua
alys es
ĠL ift
um o
Ġle apt
Ġhypothes ized
ĠGust av
it ans
VERS ION
æ ł
Rog er
Ġr and
ĠAd apter
Ġ3 31
ĠPet ition
k ies
M ars
Ġunder cut
ze es
ĠLy ons
ĠDH CP
Miss ing
Ġretire es
Ġins idious
el i
> )
. ãĢį
Ġfinal ists
ĠA ure
Ġacc user
Ġwas tes
ĠY s
ĠL ori
Ġconstitu encies
Ġsupp er
Ġmay hem
or ange
Ġmis placed
Ġmanager ial
Ġex ce
ĠCL I
Ġprim al
ĠL ent
Cry stal
h over
ĠN TS
end um
Ġd w
ĠAl c
n ostic
Ġpres erves
ĠTs arnaev
Ġtri pled
rel ative
Arc ade
k illing
ĠW EEK
ĠH anna
D ust
Com pleted
ģ «
Ġappro ves
ĠSur f
ĠLuther an
ven ants
Ġrobber ies
we ights
soft ware
at ana
ug al
Ġgrav y
ĠC ance
OLOG Y
ly ak
Ton ight
Ġunve il
Ġ19 04
ĠMin ion
ent ious
st ice
pack ages
ĠG EAR
Ġg ol
ĠHutch inson
ĠProf ession
ĠG UN
ĠDiff erence
ĠTsuk uyomi
ĠLes bian
6 70
Ġfug itive
ĠPlan etary
-------------------------------- ------------------------
Ġacc rued
Ġch icks
Ġsto pp
Ġblock ers
C od
Ġcomment ers
ĠSomew here
ĠPhot ographer
the me
Ġmay oral
w u
Ġanten nas
Ġrev amped
ĠSubject s
it Ã©
im ura
Ġentr ances
liter ally
Ġten ets
ĠO MG
ĠMP H
ĠDon key
ĠOff ense
Ġ" +
Sn ap
ĠAF B
Ġan imate
ĠS od
His panic
Ġinconsist ency
D b
F Y
Ex port
Ġa pe
Ġpear l
ib el
ĠPAC s
Ġ{ \
Ġact u
ĠHS BC
camp us
Ġpay off
Ġde ities
ĠN ato
ou ple
Ġcens ored
ĠCl ojure
Ġconf ounding
en i
Ġreck on
op he
Ġspot ting
Ġsign ifies
Ġprop el
Ġfest ive
S uggest
Ġpled ging
ĠB erman
Ġrebell ious
Ġovershadow ed
Ġinfiltr ated
j obs
67 2
Ġscal able
Ġdomin ion
ĠNew foundland
ĠMead ow
Ġpart itions
AM I
Ġsupplement ary
str ument
Ġhair y
Ġperpet uate
Ġnuts hell
ĠPot ato
ĠHob bit
Ġcur ses
Flo at
Ġquiet er
Ġfuel ing
Ġcaps ules
ĠL ust
ĠH aunted
Exec utive
Ġchild birth
G re
Ġrad iant
å İ
Ġm alls
Ġin ept
ĠWarrant y
Ġspect ator
E h
t hens
Ġculmin ating
æ ©
ary a
ãĤ ®
ilit arian
ĠOR IG
ĠSp ending
pt ives
ĠS iren
ĠRec ording
ay ne
Ġv im
Ġspr ang
T ang
ĠM FT
mor ning
ĠWe ed
m peg
cess ion
ĠCh ung
7 30
w arning
56 2
handed ly
P oor
P olitics
: #
Ġp ian
Ġfec es
ĠDocument ation
Ġban ished
Ġ3 99
ĠAR C
Ġhe inous
J ake
ĠAm ir
way ne
v re
os henko
Ġnotebook s
Ġfound ational
Ġmarvel ous
ixt ape
Ġwithdraw als
Ġh orde
ĠD habi
is able
ĠK D
Ġcontag ious
ĠD ip
ĠAr rows
Ġpronoun s
Ġmorph ine
ĠB US
68 2
Ġk osher
fin ished
ĠInstr uments
Ġf used
yd en
ĠSal mon
F ab
aff ected
K EN
C ENT
Dom ain
Ġpoke mon
ĠDr inking
G rowing
ĠInvestig ative
ĠA ether
em i
Ġtabl oid
Ġrep ro
ĠNot withstanding
ĠBers erker
Ġdram as
Ġclich Ã©
Ġb ung
ĠU RI
ĠD os
0 44
Ġpast ors
Ġl s
Ġac rylic
aun ts
Ed ward
Ġmajor ities
B ang
Ġfield ing
ĠRepl acement
ĠAl chemy
pp ard
ĠRome o
ĠSan ct
ĠLav rov
ib ble
Inst ruct
Ġimp ractical
ĠPlay boy
ce phal
Ġsw aps
Ġk an
ĠThe o
Ġillust rating
Ġdismant led
ĠTrans gender
ĠG uth
UG H
Ġtriumph ant
Ġencomp ass
Ġbook mark
udd in
j er
Ġpred icate
ES H
Ġwhen ce
ĠAB E
Ġnon profits
Se qu
Ġdi abetic
Ġp end
Ġheart felt
sh i
Ġinter acts
ĠTele com
Ġbombard ment
dep ending
ĠLow ry
ĠAd mission
ĠBl ooming
ust ration
ene gger
B rew
Ġmol ten
ĠNer d
P IN
âĸ Ģ
ave ment
Ġtou red
Ġco efficients
ĠTray von
ans son
Ġsand y
t old
fl ows
Ġpop ulous
ĠT inder
ĠBl iss
R achel
Min imum
Ġcontest ant
ĠRed uce
ĠMor se
ĠGrass ley
ĠClick er
Ġexp r
Ġs incerity
Ġmar qu
Ġelic it
ĠPro position
ĠDemon ic
Ġtac os
G reek
Ġpost war
Ġin sofar
ĠP ork
Ġ35 2
doctor al
walk ing
Ġmid term
ĠSam my
sight ed
ĠTR ANS
ic i
AL D
ĠUS L
ĠF ISA
ĠAm pl
ĠAlex andra
ine lli
Tr ain
Ġsign ify
ĠVers us
Ġob fusc
Ġk h
Ġagg ro
ĠRen ault
Ġ3 48
5 18
ox icity
0 22
ĠTw ist
Ġgoof y
D ynamic
Ġbrief ings
m ight
8 99
Ġderog atory
T ro
Ġfor ging
ĠKor an
ĠMar ried
ĠBuc s
Ġpal ate
ĠCon version
m able
4 13
Ġ( _
Ġs iph
ĠN EO
col lege
Ġmarg inally
Ġfl irt
ĠTra ps
ĠP ace
é »Ĵ
Ġgoalt ender
Ġforb ids
Ġcler ks
ĠT ant
ĠRobb ins
ĠPrint ing
Ġpremie red
Ġmagn ification
ĠT G
ĠR ouse
ĠM ock
odynam ics
Ġpre clude
ism o
ĠPul itzer
Ġaval anche
ĠK odi
rib une
ĠL ena
Elect ric
Ġref inery
Ġend owed
Ġcounsel ors
Ġd olphin
ĠM ith
Ġarm oured
hib ited
Beg in
ĠP W
O il
ĠV or
ĠShar if
ĠFraz ier
est ate
Ġj ams
Pro xy
Ġband its
ĠPresbyter ian
ĠPrem iere
t iny
ĠCru el
Test ing
Ġhom er
ĠV ERS
ĠPro l
ĠDep osit
ĠCoff in
Ġsemin ars
Ġs ql
ĠDef endants
Altern atively
ĠR ats
ç «
ethy st
' >
Ġiss uer
58 9
Ġch aired
ĠAccess ories
man ent
Ġmar row
ĠPrim ordial
C N
Ġlimit less
ĠCarn age
Ġund rafted
q v
IN ESS
on ew
Ġco hesion
98 7
Ġne cks
Ġfootball er
ĠG ER
Ġdetect able
ĠSupport ing
ĠCS V
oc ally
k Hz
Ġund e
Ġsh one
Ġbud ding
tra k
Stand ing
ĠStar craft
ĠKem p
Ben ch
Ġthw arted
ĠGround s
ath i
L isa
Dial og
ĠS X
V ision
Ġingen ious
Ù Ĳ
Ġfost ering
ĠZ a
ĠIn gram
Ġ" @
N aturally
6 16
0 35
ĠF AC
H mm
55 4
Ġacceler ator
ĠV end
Ġsun screen
Ġtuber culosis
rav iolet
ĠFunction al
ĠEr rors
ed ar
19 66
ĠSpect re
ĠRec ipes
88 5
ĠM ankind
L iverpool
Ġ| --
Ġsubst itutes
ĠX T
w ired
Ġinc o
ĠAf gh
E va
ic c
S ong
K night
Ġdilig ently
ĠBroad cast
A id
Ġaf ar
ĠH MS
aton in
ĠGr ateful
Ġfire place
ĠOm ni
e uro
ĠF RE
ĠSh ib
ĠDig est
t oggle
Ġheads ets
Ġdiff usion
ĠSqu irrel
ĠF N
Ġdark ened
out her
Ġsleep s
ĠX er
gun s
Ġset ups
Ġpars ed
Ġmamm oth
ĠCur ious
g ob
ĠFitz patrick
ĠEm il
im ov
........ .....
ĠB enny
Second ly
Ġheart y
Ġcons on
st ained
Ġgal actic
cl ave
Ġplummet ed
Ġp ests
Ġsw at
Ġrefer rals
ĠLion el
h oly
Ġunder dog
ĠSl ater
ĠProv ide
ĠAm ar
ress or
å Į
ong a
Ġtim id
Ġp iety
ĠD ek
Ġsur ging
az o
Ġ6 10
Ġdes ks
ĠSp okane
ĠAn field
Ġwars hips
ĠCob ra
Ġar ming
clus ively
ĠBad ge
ag ascar
ĠPR ESS
ĠMcK enzie
ĠFer dinand
burn ing
Af ee
Ġtyr ann
ĠI w
ĠBo one
100 7
ĠRe pt
Ċ Âł
Ġcar avan
ĠD ill
ĠBundes liga
Ch uck
Ġheal er
ãĥ¼ãĥ Ĩ
ĠH obby
Ġneg ate
Ġcrit iques
section al
mop olitan
Ġd x
Ġouts ourcing
ĠC ipher
t ap
Sh arp
Ġup beat
Ġhang ar
Ġcru ising
ĠNi agara
Ġ3 42
ill us
ĠS v
Ġsubt itles
Ġsqu ared
Ġbook store
Ġrevolution aries
ĠCarl ton
ab al
Ut ah
Ġdesp ise
ĠU M
cons ider
aid o
Ġc arts
ĠT urtles
Tr aining
Ġhonor ary
Â ¢
Ġtri angles
4 22
Ġreprint ed
Ġgrace ful
ĠMong olia
Ġdisrupt ions
ĠB oh
Ġ3 49
Ġdr ains
Ġcons ulate
Ġb ends
Ġm afia
ur on
ĠF ulton
m isc
Ġren al
Ġin action
ck ing
Ġphot ons
Ġbru ised
ĠC odes
og i
Ġn ests
ĠLove ly
ĠLib re
ĠD aryl
Ġ# ##
S ys
. ,"
Ġfree zes
est ablishment
and owski
Ġcum bers
ĠSt arg
ĠBom bs
Ġleg ions
Ġhand writing
Ġgr un
ĠC ah
sequ ent
Ġm oth
ĠMS M
Ins ert
F if
Ġmot el
Ġdex ter
ĠB ild
hearted ly
Ġpro pe
ĠText ure
ĠJ unction
ynt hesis
oc ard
ĠVer a
ĠBar th
ĠÎ¼ g
Ġl ashed
Ġ35 1
ĠZ amb
ĠSt aples
ĠCort ex
ĠCork er
Ġcontinu um
ĠWR ITE
unt a
rid or
Ġde ems
0 33
ĠG OLD
p as
Ġrep ressive
ãĥĨ ãĤ£
Ġbaff led
Sc ar
Ġc rave
Ġ ______
Ġentrepreneurs hip
ĠDirector ate
Ġ' [
Ġv ines
Ġasc ended
ĠGR OUP
ĠGood bye
Ġdo gged
ãĥ´ ãĤ¡
Man ufact
Ġunimagin able
ri ots
ier rez
Ġrel ativity
ĠCraft ing
ra ught
ud en
c ookie
Ġassass ins
Ġdissatisf ied
ac ci
Ġcondu it
Sp read
ĠR ican
n ice
izz le
Ġsc ares
ĠWH Y
ph ans
5 35
Ġprot racted
ĠKrist en
5 36
ĠSc rib
ĠNe h
Ġtwent ies
Ġpredic ament
Ġhandc uffs
Ġfruit ful
ĠU L
ĠLud wig
Ġatt est
ĠBre aker
Ġbi ologically
ĠDeal er
Ġrenov ations
f w
ess en
Al ice
ĠHen ri
Ġun ilaterally
ĠS idd
h ai
ĠSt retch
S ales
Ġcumbers ome
ĠJ avier
Ġtrend y
Ġrot ting
ĠChall enges
Ġscra ps
Ġfac ets
ĠVer onica
ĠVer ge
ĠS ana
Al ien
ĠR ih
Ġrad ial
ect ar
Ġ6 30
cl i
Mar ie
Ġwild fire
ĠCat o
h ander
Ġwait ress
Ġch ops
ĠS ECTION
Ġblunt ly
ĠCat alog
n ian
stud y
Ġpat rolling
ĠT enth
nex us
ĠN ON
op sy
Ġsc athing
s ie
Ġdeterior ated
V B
Naz is
Ġdep ictions
Ġauthent icated
ĠCon ce
k rit
Ġpromul g
ĠL ONG
U FC
ĠVis itors
ĠRec all
Ġrehab ilit
ĠSL I
Ġglac ier
ĠB ite
Ġ50 3
Ġvom it
Ġfer mented
ĠKh alid
Ġgrad ed
ĠMag icka
ĠIch igo
power ful
ic ators
75 3
Ġsh rew
Ġ35 6
Ġlegal izing
Ġall otted
ĠArch demon
ith ing
igg urat
V OL
Le od
Ġo ily
Ġindu cing
Ġamy gdala
Ġadm ins
ĠAcqu isition
C AN
Ġsche matic
Ġmo an
ĠCamer oon
Ġt ink
Ġmer ry
Ġbutter flies
ĠGo ff
Ġworks pace
ĠCor ona
Ġj avascript
ĠD olphin
ĠCant or
4 64
to e
AP S
ĠAg ing
Ġpadd ed
ĠZ heng
ĠHe ld
Ġest ranged
Ġ7 70
. }
ĠDun ham
Ġsm okes
Ġcap itals
und ai
Sh in
ĠFound ing
Ġent itle
Ġcenter piece
D iscover
Ġthere to
al ert
ĠN ou
ĠAnaly st
l c
F H
FI ELD
ĠP OV
gr ay
Ġar cs
ĠH OT
Ġr s
Ġoblig atory
ĠArchitect s
ĠS ven
ĠF EC
0 200
Christ mas
ĠAlban ia
rat om
58 7
Ġhard ships
Ġaut os
ĠCharg es
Ġap es
Ġ3 76
wal let
Ġintox ication
Ġgobl in
Ġ5 70
++++++++ ++++++++
ĠYel p
ĠMag netic
ĠBr iggs
R ail
Ġspawn s
ĠW iggins
Ġshowc ased
Ġres orted
ub en
Ġwh ipping
Ġim itate
Ġdigest ion
ĠUS PS
ĠG est
Ġye a
ĠT ight
ind al
ic as
` .
C AST
'' ;
ĠF et
opath ic
In valid
Ġregrett ed
Ġbro ccoli
ĠSc ores
e ve
Ġpost ings
Ġaccum ulating
Ġneed less
elf th
Ġmay ors
Ġsc rib
Ġanecd otes
Ġbot ched
ĠRib bon
ĠConstant ine
i uses
ess es
Ġdev ise
Comp ared
Ġp udding
Ġg arg
Ġev oke
79 7
Ġdet ox
9 09
ĠPie ces
ĠMcC artney
Ġmet ast
ĠK rypt
P OR
Ġt ending
ĠMerch ants
Pro of
ĠV arg
ĠPort able
ãĥ¼ãĥĨ ãĤ£
B rain
25 00
Ġfol iage
Ø ¹
Ġment ors
ĠA ires
Ġminimal ist
Ġing ested
ĠTro jan
ĠQ ian
inv olved
0 27
Ġer oded
RA FT
Ġbl urry
M ob
Ġbuff et
ĠFn atic
ae a
KN OWN
ĠIn it
s afety
en um
ACT ION
ĠCrus her
ĠD ates
Ġ ................
c alling
ak ov
Ġvent ured
Ġ5 55
au ga
H art
ĠA ero
M AC
Ġthin ly
Ġar ra
ST ATE
ild e
ĠJac qu
ĠFem ales
Ġthe orem
Ġ3 46
Ġsmart est
ĠPU BLIC
ĠK ron
ĠB its
ĠV essel
ĠTele phone
Ġdec ap
Ġadj unct
ĠS EN
mer ga
Ġred acted
Ġpre historic
Ġexplan atory
ĠRun s
ĠUtt ar
ĠM anny
ĠAUTH OR
ĠUnle ashed
ĠBow ling
be ans
79 3
Ġunivers es
Ġsens it
ĠK ung
re peat
ctr l
Ġp aced
Ġfull er
Cl ock
Ġrec omb
ĠF aul
ĠB unker
Ġpool ed
Ġan a
ĠM outh
LL OW
hum ane
Ġbull do
ĠMicha els
f am
Ġwreck ed
Ġport rays
ĠWh ale
ĠH es
Ġguess es
ĠBrow se
ĠL APD
Ġconsequ ential
ĠInn ocent
ĠD RAG
Ġtrans gress
ĠO aks
Ġtri via
ĠRes on
ĠA DS
-- +
ĠT oll
Ġgrasp ing
ĠTHE M
ĠT ags
ĠCon clusion
Ġpract icable
Ġho op
Ġunintention ally
Ġign ite
ĠM ov
ur ized
le hem
Ter min
Ġcolour ful
ĠLin ear
ĠEll ie
G y
Ġman power
Ġj s
Ġem oji
ĠSHAR ES
_ .
0000 7
Ġsophistic ation
Ġunders core
Ġpract ise
Ġbl ob
op ens
Uk raine
Ke eping
Y C
J R
ult imate
Cl aim
Ġautom obiles
99 3
ste el
Ġpart ing
ĠL ank
... ?
Ġ38 5
Ġremem brance
Ġe ased
Ġcov ari
ĠS ind
Effect ive
Ġdisse mination
ĠMo ose
ĠCl apper
br ates
App ly
Ġinv is
Ġwors ened
âĢĶ -
Ġlegisl ator
ĠL ol
ĠRow e
Ġdealers hip
um ar
id ences
Ġinvestig ates
Ġc ascade
Ġbid der
ĠB EN
Iron ically
Ġpres iding
Ġd ing
Ġcontrad icted
Ġshut s
ĠF IX
Ġ3 66
Dist rict
Ġsin ful
ĠChar isma
o ops
Ġtot ality
Ġrest itution
ĠOpt imus
ĠD ah
Ġcl ueless
urn ed
Ġnut rit
Ġland owners
Ġfl ushed
Ġbroad en
m ie
Ġprint ln
Ġn ig
ĠCorp us
J en
Ġprot o
ĠWik imedia
ĠPal o
C OR
Ġstory lines
Ġevangel icals
ĠDar rell
Ġrot or
ĠH W
sk illed
ery l
Ġbe gg
ĠBl umenthal
Ġwe aving
Ġdown wards
ĠJack et
ĠANG EL
Te chnology
Ġes oteric
alde hyde
Ġfur iously
Ġforeign er
We ak
CH O
ĠH ound
Exper ience
ĠPlay station
ĠM IA
ĠU ng
cl oth
ag all
Ġcal ming
iz ens
St ruct
ĠW itches
ĠCeleb ration
Ġ........ ......
pt roller
ĠTC U
Ġb unny
ãĥ į
ut orial
Ġup scale
ĠSt a
ĠCol ossus
Ġchlor ide
ĠZ ac
ĠRe asons
ĠBrook ings
ĠWH ITE
][ /
ĠL ose
9 05
Ġunders ide
ern els
Ġv ape
do zen
upp et
ĠST OP
mat ical
ĠStat ements
hed dar
P AC
Custom er
Ġmem os
ĠP J
end ars
ĠLim its
l augh
Ġstabil ized
ĠALE C
Y A
Up grade
al am
Ġtechn o
Ġan ew
fore seen
Ġcolleg iate
ĠPy ro
ĠD ism
Ġfront line
Ġammon ia
I U
Qu ite
John ny
ass in
G OP
ĠSt yles
ĠSovere ign
acter ial
5 49
ĠR IP
ĠL ists
Ġ3 64
ĠRece p
s ocket
ĠByr d
ĠCand le
An cient
Ġappell ant
en forcement
ace a
ans ki
Ġold s
88 6
Ġsl urs
Ġem pires
Ġbuck le
Ġalien ation
ĠAber deen
Ġunic orn
Ġoverr iding
ĠL X
pp a
Ġdesp ised
ĠB ugs
ĠB ST
S outhern
5 33
Ġhall mark
ĠPost er
Ġstem med
Ġprincip als
ĠT ECH
ĠSand wich
It aly
Ġche esy
ĠSet TextColor
ĠProt ective
ĠC ohn
J O
apt op
Re ason
Lead er
ĠUnder stand
ĠFr idays
ĠContin uous
Ġcl ipping
ĠR ye
Ġber th
tim er
ann is
re act
Ġbuff alo
ĠPar as
Ġ6 55
Ġpres ided
ĠSun rise
Ġve ts
Ġcl oves
ĠMcC ull
Stre ngth
G AN
Ġill iter
ĠPric ing
l Ã©
Ġresist or
Ġbr un
ĠSuff olk
Ñ ĭ
ĠL iver
Re leased
Ġwhat s
8 60
ĠMe asures
Ġden ouncing
ĠRy zen
Ġsou ven
Ġcareg ivers
ch ini
ĠScar lett
Ġt rough
Cong ratulations
Ġtax is
ĠTrad ition
j it
Ġtable top
Ġhither to
Ġdis information
off ensive
h ra
ĠDISTR ICT
Ġcompl icate
chen ko
ĠRecon struction
Ġpalp able
Ġa usp
Ġ4 28
Ġshowc ases
ĠPublic ation
know ledge
inn on
4 19
Ġretri eval
and ers
Ġref ute
Ġinqu ired
g ur
Ġneg ativity
Ġcons erve
Ġafter life
Ġpres upp
ĠGill espie
Ġm t
ĠD N
T ap
Ġper pend
ĠS my
does n
Ġsp illing
Ġhyp ers
K ate
Â® ,
ke pt
ĠP owered
Ġj a
ĠK lux
ard e
ab an
Ġ4 44
Ġflatt ened
ĠImprove ments
urg a
ĠK und
Ġins cribed
Ġfac ult
Ġunpre pared
ĠCons umers
Ġsatisf ies
Ġpul monary
Ġinf iltration
Ġex ternally
Ġcongrat ulations
ag han
Ġair liner
Ġfl ung
Ġfly ers
G D
Ġsnipp ets
Ġrec ursive
Ġmaster ing
L ex
Ġovert ly
v g
Ġluck ily
Ġenc ro
ĠLanc et
ĠAbyss al
function al
Ġs ow
Ġsqu id
Ġnar ration
Ġn aughty
ĠHon our
ĠSpart ans
Ġsh atter
ĠTac oma
ĠCal ories
ĠR aces
Sub mit
Ġpurpose fully
w av
ĠY ok
F est
ĠG err
Met ro
Ġit iner
f amous
Ġ" {
in line
was her
Iss ue
ĠCL IENT
oz o
Vers ions
7 25
ĠGl ock
Ġshield ed
ĠPC R
ENC Y
ĠWe ld
ĠSim pl
Ġredirect ed
ĠK ham
Ġ( >
Ġlab ou
Ġdi apers
ss l
Ġcell ar
organ isms
ore sc
ĠBer ks
did n
Sh ipping
C hest
Ġund one
Ġmillion aire
Ġc ords
ĠYoung er
appropri ately
Ġsequ els
u ve
ant icipated
Ġle wd
ĠSh irt
ĠDmit ry
V eter
Ġsl aying
ĠY ar
Ġcompl ication
I owa
ĠEric a
ĠBL M
g irlfriend
b odied
6 26
19 63
Ġintermedi ary
Ġcons olation
M ask
ĠSi em
ow an
Beg inning
Ġfix me
Ġculmin ated
Ġcon duc
ĠVolunte er
Ġpos itional
Ġgre ets
ĠDefin itions
Ġthink er
Ġingen uity
Ġfresh men
ĠMom ents
Ġ35 7
ate urs
ĠFed Ex
s g
69 4
Ġdwind ling
ĠBO X
sel age
Ġt mp
Ġst en
ĠS ut
Ġneighbourhood s
Ġclass mate
f ledged
Ġleft ists
Ġclim ates
ATH ER
ĠScy the
ul iffe
Ġs ag
Ġho pped
ĠF t
ĠE ck
ĠC K
ĠDo omsday
k ids
Ġgas ped
Ġmon iker
ĠL od
ĠC FL
t ions
r ums
fol ios
Ġm d
Ġunc anny
Ġtrans ports
ĠLab rador
Ġrail ways
Ġappl iance
ĠCTR L
æ Ģ
Pop ulation
ĠConfeder acy
Ġunb earable
Ġdors al
ĠIn form
op ted
ĠK ILL
Mar x
Ġhypoc ritical
q us
ĠN umerous
ĠGeorg ian
ĠAmbro se
ĠL och
Ġgu bernatorial
ĠX eon
ĠSupp orts
ens er
ee ly
ĠAven ger
19 65
Ar my
Ġju xtap
Ġcho pping
ĠSpl ash
ĠS ustainable
ĠFin ch
Ġ18 61
ict ive
at meal
ĠG ohan
Ġlights aber
ĠG PA
ug u
ĠRE PL
vari able
Ġher pes
Ġdesert s
ac iously
Ġsitu ational
week ly
ob l
Ġtext ile
ĠCorn wall
Ġcontrace ptives
ĠA ke
] -
ä¹ ĭ
: ,
ĠW em
ĠB ihar
Ġ' .
Ġbe re
Ġanal ogue
ĠCook ies
Ġtake off
Whe el
Ġmaj estic
Ġcomm uting
0 23
ĠCor pse
ass ment
min i
Ġgor illa
ĠAl as
ere e
Ġacquaint ances
ĠAd vantage
Ġspirit ually
Ġey ed
pm wiki
ĠE nder
Ġtrans lucent
Ġnight time
ĠIM AGES
5 45
ĠK amp
ĠFre ak
Ġ ig
Port land
4 32
ĠM ata
Ġmar ines
Ġh ors
ater asu
ĠAtt ribution
Ġ-------- -
Ġk ins
ĠBEL OW
++ +
Ġre eling
ol ed
Ġcl utter
ĠRel ative
Ġ4 27
B US
Ġa vert
ĠChe ong
ĠA ble
ĠPry or
Develop er
Ġen cyclopedia
ĠUSA F
ĠG arry
Sp ain
Bl ocks
Ġexp osition
ĠGamer Gate
W OR
Ġstockp ile
Ġclot hed
ĠT one
ĠR ue
t umblr
Ġtreacher ous
Ġf rying
Ñ Į
ĠS ph
Ġrest raints
Ġemb odies
ĠG es
S afety
Ġnegoti ators
min ing
ĠAppalach ian
L OS
ĠJenn a
Ġpass ers
ç ĭ
sn ap
Ġshort en
creat or
Ġinn umerable
uther land
67 4
ĠW OM
ĠAs cend
ĠArm ory
ĠTrans action
K ick
Ġsuit case
day Name
Ġwaste ful
mar riage
ĠMcC abe
ite ch
ĠO ss
Cl osure
ĠTreasure r
Ġindec ent
ĠD ull
Ġresid ences
19 59
ĠS ettlement
Ham ilton
Ġself ies
ĠRank ing
ĠBark ley
ĠB ore
ĠW CS
ĠMar itime
ĠH uh
ĠForest ry
Ġcultiv ating
ĠBall ard
Ġg arrison
ĠSD L
9 30
Ġnas cent
Ġirresist ible
Ġaw fully
\/ \/
Ġequ ate
Ġanthrop ology
ĠSylv ia
Ġintest ine
Ġinnoc uous
cess ive
ag ra
ĠMet roid
G rant
8 55
ģ ĸ
Ġ" _
ãĥĥ ãĥī
Ġappra isal
ĠFred dy
04 6
Ġ40 6
Ġ18 30
Ġd ocking
St atic
Ġp ont
ĠVolt age
ĠSt ead
ĠMort gage
ĠJon ah
Y L
CLASS IFIED
Ġas bestos
nik ov
Ġcoll agen
ĠOrb ital
P ocket
7 99
Ġhy brids
inc hes
Ġinv oice
und y
Ġinequ alities
T rend
w ashed
B ALL
Ġluc id
ĠComment ary
Ġw itty
Br andon
Ġbru ising
Ġ6 20
es cent
box ing
P OL
Ġ3 78
R ect
Ġlic ences
ĠMcG ee
p ressed
D anny
Ġj ammed
ord inate
Ġle th
Ġdistingu ishes
ĠYam aha
IL S
ĠH ume
ĠC ategories
Rober ts
Ch art
Ġbeet le
ĠGra veyard
Ġ($ )
o ÄŁ
Ġtw ilight
are lla
á ½
Ġbooth s
ĠH HS
ĠFeld man
Ġexcav ation
Ġphilosoph ies
at ography
ĠGar age
te chnology
Ġunfor gettable
Ġver ifying
Ġsubord inates
E ls
Ġne b
G aming
EN A
ĠAchieve ment
it ters
ĠG abe
Ġd umps
for cer
Ġpo ignant
ĠM BA
ĠHe idi
ime i
Ġm ages
Ġliber ate
Ġcircum cised
ĠMer maid
ĠMat th
t ogether
ĠW ichita
Ġstore front
ĠAd in
V II
Four th
Ġexplore rs
W ER
Not able
Bro ok
m ens
F aith
-------- -
ĠJ ou
¬ ¼
Ġpine apple
Ġam alg
el n
ark able
ĠãĤµ ãĥ¼ãĥĨãĤ£
ĠãĤµãĥ¼ãĥĨãĤ£ ãĥ¯ãĥ³
Ġov arian
ĠE choes
Ġhairc ut
Ġp av
Ġch illed
anas ia
Ġsty led
Ġd ab
ni per
Ġminister ial
ĠD UP
T an
Ġsul ph
ĠD eter
ĠBo hem
od an
Ġeduc ator
â ĵĺ
sp ir
Ch icken
ĠE leanor
Ġqu i
Ġheav iest
Ġgrasp ed
U RA
Ġcro oked
Jess ica
pro blem
Ġpred etermined
Ġman iac
Ġbreath s
ĠLauder dale
Ġh obbies
y z
Cr ime
Ġcharism a
d L
Ġle aping
Ġk ittens
Ang elo
ĠJ ACK
ĠSu zanne
Ġhal ting
ENT ION
Ġswall owing
ĠEarthqu ake
Ġeight eenth
ĠN IC
ĠIN F
ĠCons cious
Ġparticular s
circ le
7 40
Ġbene volent
Ġ7 47
Ġ4 90
Ġr undown
ĠVal erie
ĠB UR
Ġcivil isation
ĠS chn
W B
ot ide
intern ational
Ġj ohn
Ġ19 02
Ġpe anuts
Ġflav ored
k us
Ġro ared
Ġcut off
é £
Ġorn ament
Ġarchitect ures
Ġ3 69
ol or
ĠWild e
ĠC RC
ĠAdjust ed
Ġprov oking
land ish
Ġrational ity
Ġjust ifies
Ġdisp el
Ġa meric
ĠPol es
Ø ©
Ġen vis
ĠD oodle
ä½ ¿
igs aw
auld ron
Techn ical
T een
up hem
ĠX iang
Ġdetract ors
ĠZ i
ĠJournal ists
Ġconduc ive
ĠVolunte ers
Ġs d
Know ing
Ġtrans missions
ĠPL AN
ĠL IB
Ġall uded
Ġob e
Ġd ope
ĠGold stein
Ġwavelength s
ĠDest ination
nd a
ug i
Ġattent ive
ĠLe an
ral tar
Ġman g
mb uds
ak ings
b ender
Ġacc ol
Ġcraw led
N OW
Min nesota
Ġflour ished
ĠZ up
ĠSuper visor
ĠOliv ier
Ex cellent
Ġwid en
D one
Ġw ig
Ġmiscon ceptions
Cor p
W an
Ġvener able
ĠNot ably
ĠKling on
an imate
Bo ost
ĠS AY
miss ing
ibli ography
mel on
Ġpay day
Ø ³
bo le
Ġve iled
ĠAl phabet
It alian
Ġever lasting
ĠR IS
ĠC ree
rom pt
Ġh ating
Ġgrin ning
Ġge ographically
OS H
Ġwe eping
ĠÂłĠÂłĠÂłĠÂł ĠÂłĠÂłĠÂłĠÂł
Ġimpe cc
Let ter
Ġblo ated
PL A
ĠFe in
Ġper sever
Th under
Ġa ur
ĠR L
Ġpit falls
âĸ º
Ġpredomin ant
Ġ5 25
7 18
AP E
7 14
Ġfarm land
ĠQ iao
Ġv iolet
ĠBah amas
Ġinflic ting
ĠE fficiency
Ġhome brew
Ġundert ook
Ġcur ly
ĠHard ing
man ia
59 6
Ġtem pered
Ġhar rowing
ĠP ledge
ĠFranken stein
è ª
M otion
Ġpredict ably
ĠExpl osion
oc using
er d
col o
FF ER
Ġback field
ĠV IDE
ue bl
N arr
ĠArg ument
Ġgen omic
Ġbout ique
Ġbatt ed
ĠB inary
Ġg amb
ĠRh ythm
67 3
Ġa float
ĠOlymp ia
Y ING
Ġend if
is in
Ġwin ters
Ġsc attering
I v
D istance
Ġtr u
ĠCom fort
Ġne xus
Ġair flow
ĠByz antine
p ayers
con i
ĠB etsy
D eal
ĠN ug
ĠContin ent
red ibly
Ġoptim izing
al beit
Ġec static
ĠPro to
ç ·
iv ot
âĸ Ħ
em p
rou nder
Ġcl out
ĠI ST
66 3
ĠDoll ars
ĠD AC
Ġsubsc ribed
Ġrehears al
Ġam ps
ĠSh ang
es m
Ġspr inkle
Ġassail ant
ĠO o
ĠCoin base
T act
Ġret ina
Ġn uns
R ON
att o
Ġj ug
ĠSV G
Ġb ikini
ĠFI LE
ĠFound ers
ep ort
ĠK P
Ġrest ores
ĠTh ick
Ġash ore
Ġappro vals
R ender
M AG
G raham
ĠCort ana
ãĥ³ ãĤ¸
ss h
or ians
ars ity
ĠInsp ired
u pper
Ġsign alling
Ġreb uke
Ġfl ares
Ġdownt ime
Stud ies
Ġstagn ation
ĠSequ ence
Ġgr unt
Ġass ures
ĠPL A
59 2
Ġintra ven
d epend
Sus an
ĠManz iel
Man ia
Cont ract
Ġsl ams
Ġcult ured
Ġcred itor
L IST
ĠH UM
ĠChatt anooga
serv ed
Ġclo aked
ĠF TP
p owder
ĠSt ella
uct ive
Ġcheap ly
ĠMU CH
ĠGalile o
Ġsu ites
spe ech
Ġdeliber ations
ĠCh ips
« ĺ
Bal ance
ĠWyn ne
ĠAk ron
Ass et
Ġhon oured
Ġed ged
Like wise
anim ous
ĠW age
ĠEz ek
ad vertisement
ĠRT X
ĠM AD
Ġmigr ating
ĠS QU
Ġ4 75
Ed ited
Ġshorth and
ĠBas ics
Ġcro tch
ĠEV EN
Ġv m
effic iency
Ġcal ves
ĠF rie
ĠBrill iant
Ġstri kers
Ġrepent ance
Ġarter ies
r l
B ed
h ap
Ġcrypt ography
ĠSab res
Ġ4 14
vi ks
ih ara
aps es
T alking
Ġintertw ined
Ġdoc ks
Ġalle le
ĠArt ifact
ĠH IM
t orn
ç ķ
Ġop acity
ĠE ly
os uke
Ġn ipple
Ġhand written
ĠV K
ĠChamber lain
ĠLa os
ig raph
g row
Ġtr illions
Ġdescend ant
ĠSail or
as uring
Ġce ilings
ĠWare house
f lying
ĠGl ow
Ġn ont
Ġmiscar riage
Ġrig s
Ġmin istries
Ġelabor ated
Ġdel usional
ĠHum ane
Ġ3 79
n ets
Ġblack out
add ers
Ġn p
ĠT ire
ro sc
Ġsub div
Ġlink age
Ġchron ological
ĠHER O
Ġres ettlement
ĠVin yl
Ġpast oral
ĠMob il
ĠBar bar
Co oldown
ĠF ritz
c riminal
re pe
Ġbell ig
ĠBre ed
Ġ4 18
Ġsem blance
ij k
Ġcur tail
Ġclin ch
cont ained
ĠProm pt
ast on
Ġw i
Ġpursu its
5 15
ĠGl oss
Ġfl ips
Ġcoup ons
Ġcl oning
ĠLike ly
Rem oved
ĠQu artz
r ices
ĠSpe ars
Ġp ious
Ġdep reciation
ĠD are
oun ces
am az
O nt
Ġp innacle
d ocker
0 26
ĠW yr
ĠPro per
Ë Ī
n il
By tes
Ġseek er
t rial
Ġunf olds
ĠMar se
Ġextravag ant
ĠSurviv ors
RED ACTED
ĠSpeed way
ĠCra igslist
sub mit
ĠGener ations
Ġup holding
Ġblood stream
ĠMiss ions
ĠL awn
Ġlim bo
ene i
H uh
ĠWild cats
pre p
ĠMark us
ĠFor bidden
rit ic
IN O
Ġexhib iting
requ ent
ch uk
Ġhabit ual
ĠComp atibility
Dr ag
RIP T
uj ah
GR OUND
Ġdelinqu ent
Ġburn er
Ġcontempor aries
Ġgimm ick
load s
Ġno zzle
p odcast
ĠW ak
ĠStat en
ĠK uh
ãģ ĵ
inter rupted
Ġinv incible
ĠBurn ett
cig arette
ĠPeb ble
ĠTem porary
ĠMar ino
58 2
Ġwast eland
ident ly
T x
Ġr ite
ĠPan asonic
ĠM iddles
ĠHort on
ae us
Ġc uring
Ġm ats
Ġadj ourn
Ġfears ome
pe z
bo ats
Ġpro pell
Ġconflic ted
ĠAng er
Ġinsurg ent
K arl
Ġco ales
Ġsouth western
Ġdis su
ĠO vert
******** ****
Ġbox ed
ĠBr une
aa a
Ġgard ening
ĠEng el
tr acks
Ġpur ified
Ġplace holder
ĠL ikes
Ġd an
G ab
Ġe ct
ĠF aw
ĠEl iot
Ġ' ,
otrop ic
ĠRu in
hed on
Ġca ul
Ġa ft
ĠCad illac
gh a
ass ian
ud eb
ĠT ick
Ġadjust s
AR GET
5 37
isc he
ant y
ĠFried rich
ĠBl izz
ĠA OL
Camp aign
Ġmamm al
ĠVe il
ĠK ev
ĠMaur it
ĠDam ien
N ation
E astern
Ġ{ :
Ġ= ================================
Ġstereotyp ical
Ġatt ic
ĠCy borg
requ ire
Ġaward ing
ĠPap ua
bt n
b ent
B oo
Ġ( =
ĠX ander
ĠSomers et
Ġcatch y
Ġcert ify
STR UCT
Ġit al
Ġt ides
ĠBr ands
G ray
comp etitive
Ġcur ator
ĠD G
omin ium
ĠGM Os
ci ating
ĠCarm en
ow ard
Balt imore
Ġr gb
C u
Ġwip es
spe ll
IT NESS
Ġsummar izes
ĠRe vis
Ġwhistlebl owers
ĠBre ach
Ġcro chet
k os
ews ki
Ġrep et
Ġcrim son
ĠKar achi
read able
dim ension
ĠI gor
ild ed
ĠZ ed
ĠKe ane
ĠCos metic
DE P
Ġretreat ing
ĠU A
ens ical
Ġd usk
ĠDick ens
Ġaren as
ĠPass age
level s
Ġcur v
P ope
Ġch ores
ĠEl ise
ĠComp ass
b ub
Ġmamm alian
ĠSans krit
ĠAN C
ĠCr ack
Q ual
L aun
amp unk
Ġlearn ers
Ġglam orous
Ġfur the
erm ott
c and
Gener ic
Ġnarr ated
Ġdisorder ly
ĠTrans actions
ĠDet ention
ĠR oku
Ä į
Ġunder statement
ĠS aur
ĠRodrig o
ĠAS AP
S in
Ġre joice
Method s
Ġelectro de
Ġworsh ipped
Ġid i
ĠPhys icians
Ġpop up
Ġde ft
ĠRem oval
ĠBu enos
ver bs
Ġfun k
ush a
rict ion
ore a
ĠBang alore
ĠKen obi
zz i
Ġnorm ative
Ġgobl ins
Ġcaf es
ĠUN CLASSIFIED
ĠF ired
S IGN
Ġs clerosis
ĠV oter
ĠSon ny
ĠExt end
ĠEV s
Ar senal
Ġp si
Ġwid est
ĠT us
Ġlo oms
Ġjust ifying
ĠGr anger
è ¯
Ref er
58 3
Ġflour ishing
ab re
Ġr ave
ĠCont ra
Ġ18 98
Add s
Ġf ul
ĠCo oke
some one
= #
67 1
Ġy ak
Ġar te
ĠMis cellaneous
ĠDet ection
ĠCl ancy
â ģ
ass ies
Ġval iant
ĠFemin ist
cor ruption
V el
P ear
Ġsucc inct
Ġquick est
k w
Ġsp itting
ĠL ibraries
åħ ī
ant z
D ad
ĠSpec ifications
rup ulous
and r
RES ULTS
Ġsnow ball
Ġpred is
ĠB axter
ĠNurs ing
ĠCh aff
s we
Ġout age
Ġnest ing
Ġnotor iety
tr igger
on ite
j on
Ġf ou
ook ed
ĠCelebr ity
re ality
Ġfat ig
Ġhug ging
Ġbother s
ĠPan zer
ĠCh andra
fig ured
Ġvol ts
ĠCloud s
Ġfee ble
ĠCur ve
ĠAs us
78 6
abs or
ĠV ICE
ĠH ess
Ġmanufact ures
Ġgri zz
ĠPower ful
ac id
Ġsub sections
ĠKrug man
ĠAl ps
is u
Ġsequ est
ĠUlt ron
ĠT inker
ĠGo ose
Ġmism atch
Att orney
Ġmorph ology
ĠSix ers
ut tered
ĠE LECT
gr an
Rus sell
ĠG SL
Ġfort night
Ġ. )
Ġapost le
pr one
el ist
Unt itled
ĠIm plementation
ist ors
Ġtank er
Ġpl ush
Ġattend ants
ĠT ik
ĠGreen wich
ĠY on
ĠSP L
cell s
unt led
S olution
ĠQu Ã©
Ġvac ated
Ġupt ick
ĠMer idian
æ ĥ
ĠDr ill
9 25
58 4
Ġrenov ated
ĠKub rick
zy k
Ġl ousy
pp el
ohyd rate
ĠI zzy
lesi astical
CC C
ĠAj ax
Ġad apters
ĠPetra eus
Ġaffirm ation
ĠST OR
le ms
ad oes
ĠConstantin ople
Ġp onies
Ġl ighthouse
Ġadherent s
ĠBre es
omorph ic
Fight ing
Ġpl aster
ĠP VC
ĠOb st
Ġdear ly
ĠTo oth
icks on
Ġsh aming
P lex
A gg
ĠâĢ¦ "
Ġsub reddits
Ġpige on
ĠResident ial
ĠPass ing
Ġl um
ĠP ension
Ġpessim istic
Ġ4 32
z inski
c ade
0 75
Ġapolog ised
iy ah
Put ting
Ġgloom y
ĠLy me
=-=-=-=- =-=-=-=-
ĠT ome
ĠPsych iatric
ĠH IT
c ms
ap olog
Ġbreak er
Ġdeep en
Ġtheor ist
ĠHigh lands
Ġb aker
Ġst aples
Ġinterf ered
ĠAb ortion
jo ined
ch u
Ġform ulate
Ġvacc inations
Ġban ter
phe us
Ġoutfield er
ĠM eter
Ġ# ####
Ġ18 95
Ġnarrow ing
ĠST ORY
f p
ĠC ST
ign ore
Ġproclaim ing
ĠR U
ĠB ALL
yn a
65 3
Ġpos it
P RE
59 4
ĠRegist rar
ĠPil grim
ic io
Ġpre tt
Ġlif eless
Ġ__ _
Ne igh
ĠCh urches
orn o
Ġor cs
Ġkind red
ĠAud it
Ġmillenn ial
ĠPers ia
g ravity
ĠDis ability
ĠD ARK
W s
od on
Ġgrand daughter
ĠBro oke
ĠA DA
ER A
Ġpick ups
ĠWil kinson
ĠSh ards
ĠN K
Ġexp el
ĠKis lyak
Ġj argon
Ġpolar ized
ian e
Pub lisher
Ġreb utt
Ġapprehens ion
ĠK essler
Ġpr ism
F UL
19 64
ĠL oll
ä ¿
le thal
Å Ł
Ġg hetto
Ġb oulder
ĠSlow ly
ĠOsc ars
ĠInst ruction
ĠUl tr
ĠM oe
N ich
ĠP ATH
( *
ĠRE LEASE
un ing
rou se
en eg
Ġre imb
ĠDet ected
Do S
Ġster ling
Ġaggreg ation
ĠLone ly
ĠAtt end
hig her
Ġairst rike
ks on
SE LECT
Ġdef lation
ĠHer rera
C ole
rit ch
Ġadvis able
F ax
Ġwork around
Ġp id
mort em
ers en
Ġtyp o
Ġal um
78 2
ĠJam al
script s
Ġcapt ives
ĠPres ence
ĠLie berman
angel o
Ġalcohol ism
ass i
Ġrec ite
Ġgap ing
Ġbask ets
ĠG ou
Brow ser
ne au
Ġcorrect ive
und a
sc oring
ĠX D
Ġfil ament
Ġdeep ening
ĠStain less
Int eger
Ġbu ggy
Ġten ancy
ĠMub arak
Ġt uple
ĠD roid
ĠS itting
Ġforfe it
ĠRasm ussen
ixt ies
es i
ĠKim mel
Ġmetic ulously
Ġap opt
ĠS eller
08 8
ec ake
hem atically
T N
Ġmind less
Ġdig s
ĠAcc ord
ons ense
em ing
br ace
Ġe Book
ĠDist ribut
ĠInvest ments
w t
] ),
beh avior
56 3
Ġbl inding
ĠPro testers
top ia
Ġreb orn
ĠKel vin
ĠDo ver
ĠD airy
ĠOut s
Ġ[ /
Ï Ģ
b p
ĠVan ity
ĠRec ap
ĠHOU SE
ĠF ACE
Ġ4 22
69 2
ĠAnt ioch
cook ed
Ġcoll ide
Ġa pr
Ġsle eper
ĠJar vis
Ġalternative ly
ĠLe aves
ĠM aw
Ġantiqu ity
ĠAdin ida
Ġab user
PokÃ© mon
Ġass orted
ĠRev ision
ĠP iano
ĠG ideon
O cean
Ġsal on
Ġbust ling
ogn itive
ĠRah man
Ġwa iter
Ġpres ets
ĠO sh
ĠG HC
oper ator
Ġrept iles
Ġ4 13
ĠG arr
ĠCh ak
Ġhas hes
Ġfail ings
Ġfolk lore
Ġab l
ĠC ena
ĠMac Arthur
ĠCOUR T
Ġperipher y
app ers
Ġreck oned
ĠInf lu
ĠC ET
Ġ3 72
ĠDefin itive
ass ault
4 21
Ġreservoir s
Ġd ives
ĠCo il
DA Q
Ġvivid ly
ĠR J
ĠBel lev
Ġec lectic
ĠShow down
ĠK M
ip ed
reet ings
ĠAs uka
L iberal
ĠÏ Ħ
Ġbystand ers
ĠGood win
uk ong
S it
ĠT rem
Ġcrim inally
ĠCirc us
ch rome
88 7
Ġnan op
ĠOb i
ĠL OW
o gh
ĠAuth ors
ob yl
Ur ban
Ġt i
ĠWe ir
t rap
ag y
Ġparent heses
Ġout numbered
Ġcounter productive
ĠTob ias
ub is
P arser
ST AR
Ġsyn aptic
ĠG ears
Ġh iber
Ġdebunk ed
Ġex alted
aw atts
H OU
Ch urch
ĠPix ie
ĠU ri
ĠForm ation
ĠPred iction
C EO
Ġthro tt
ĠBrit ann
ĠMad agascar
ë ĭ
Ġbill boards
ĠRPG s
ĠBe es
complete ly
F IL
Ġdoes nt
ĠGreen berg
re ys
Ġsl ing
Ġempt ied
ĠPix ar
ĠDh arma
l uck
ingu ished
Ġend ot
Ġbab ys
05 9
che st
r ats
Ġr idden
Ġbeet les
Ġillum inating
Ġfict itious
ĠProv incial
Ġ7 68
Ġshe pherd
ĠR ender
Ġ18 96
C rew
Ġmold ed
ĠXia omi
ĠSp iral
Ġdel im
Ġorgan ising
Ġho ops
ĠBe i
z hen
Ġfuck in
Ġdec ad
Ġun biased
am my
sw ing
Ġsmugg led
Ġk ios
ĠP ERSON
ĠInquis itor
Ġsnow y
Ġscrap ing
ĠBurg ess
P tr
ag ame
R W
Ġdro id
ĠL ys
ĠCass andra
Jac ob
Ġ35 4
Ġpast ure
Ġfr anc
ĠScot ch
ĠEnd s
ĠI GF
def inition
Ġhyster ical
ĠBrown e
77 1
Ġmobil ization
æ ķ
iqu eness
Th or
Ġspear headed
Ġembro iled
Ġconject ure
jud icial
Ch oice
Ġpaper back
P ir
Ġrec overs
ĠSur ge
ĠSh ogun
ĠPed iatrics
ãģ ł
Ġsweep s
ĠLabor atories
ĠP acks
al us
add in
Ġhead lights
g ra
Ev idence
COL OR
Ad min
Ĭ ±
Ġconco ct
s ufficient
Ġun marked
Ġrich ness
Ġdiss ertation
Ġseason ing
Ġg ib
ĠM ages
un ctions
ĠN id
che at
ĠTM Z
c itizens
ĠCatholic ism
n b
Ġdisemb ark
ĠPROG RAM
a ques
Ty ler
Or g
ĠSl ay
ĠN ero
ĠTown send
IN TON
te le
Ġmes mer
9 01
Ġfire ball
ev idence
aff iliated
ĠFrench man
ĠAugust a
0 21
Ġs led
Ġre used
ĠImmun ity
Ġwrest le
assemb led
Mar ia
Ġgun shots
ĠBarb ie
Ġcannabin oids
ĠTo ast
ĠK inder
IR D
Ġre juven
Ġg ore
Ġrupt ure
Ġbre aching
ĠCart oon
Ġ4 55
ĠPale o
6 14
Ġspe ars
ĠAm es
ab us
Mad ison
GR OUP
Ġab orted
y ah
Ġfel on
Ġcaus ation
Ġprep aid
Ġp itted
op lan
ĠShel ley
ĠRus so
ĠP agan
Ġwill fully
ĠCan aver
und rum
ĠSal ary
ĠAr paio
read er
ĠR ational
ĠOver se
ĠCa uses
Ġ* .
Ġw ob
Ke ith
ĠCons ent
man ac
77 3
6 23
Ġfate ful
et imes
Ġspir ited
ĠD ys
Ġhe gemony
Ġboy cot
ĠEn rique
em outh
Ġtim elines
ĠSah ara
ĠRel ax
ĠQuin cy
ĠLess ons
ĠE QU
SE A
N K
ĠCost co
Incre ase
Ġmotiv ating
ĠCh ong
am aru
ĠDiv ide
Ġped igree
ĠTasman ia
ĠPrel ude
L as
9 40
57 4
Ġch au
ĠSp iegel
un ic
-- >
ĠPhil ips
ĠKaf ka
Ġuphe aval
Ġsent imental
Ġsa x
ĠAk ira
ser ial
Mat rix
Ġelect ing
Ġcomment er
ĠNeb ula
ple ts
ĠNad u
ĠAd ren
Ġen shr
ĠR AND
fin ancial
ĠCly de
uther ford
Ġsign age
Ġde line
Ġphosph ate
rovers ial
f ascist
ĠV all
ĠBeth lehem
Ġfor s
Ġeng lish
S olid
N ature
Ġv a
ĠGu ests
Ġtant al
Ġauto immune
;;;;;;;; ;;;;
ĠTot ally
ĠO v
Ġdef ences
ĠCoc onut
Ġtranqu il
Ġpl oy
Ġflav ours
ĠFl ask
ãĤ¨ ãĥ«
ĠWest on
ĠVol vo
8 70
Ġmicro phones
ver bal
R PG
Ġi ii
; }
0 28
Ġhead lined
Ġprim ed
Ġho ard
ĠSh ad
ĠEN TER
Ġtri angular
Ġcap it
l ik
ĠAn cients
Ġl ash
Ġconv ol
Ġcolon el
en emy
G ra
Ġpub s
ut ters
Ġassign s
ĠPen et
ĠMon strous
ĠBow en
il ver
H aunted
ĠD ing
start ed
pl in
Ġcontamin ants
ĠDO E
ff en
ĠTechn ician
R y
Ġrob bers
Ġhot line
ĠGuard iola
ĠKau fman
row er
ĠDres den
ĠAl pine
E lf
Ġf mt
ĠS ard
urs es
g pu
Un ix
Ġunequiv ocally
ĠCitizens hip
qu ad
m ire
ĠS weeney
B attery
6 15
Ġpanc akes
Ġo ats
M aps
ĠCont rast
mbuds man
ĠE PS
Ġsub committee
Ġsour cing
Ġs izing
ĠBuff er
ĠMand atory
Ġmoder ates
ĠPattern s
ĠCh ocobo
ĠZ an
ĠSTAT ES
ĠJud ging
ĠIn her
* :
Ġb il
ĠY en
Ġexh ilar
oll ower
z ers
Ġsn ug
max imum
Ġdesp icable
ĠP ACK
ĠAn nex
Ġsarcast ic
Ġlate x
Ġt amp
ĠS ao
b ah
ĠRe verend
ĠChin atown
ĠA UT
d ocumented
ĠGA BA
ĠCan aan
ĠÙ ħ
Ġgovern s
pre v
E sc
ĠEst imates
OS P
Ġendeav our
ĠCl osing
omet ime
every one
Ġwor sen
Ġsc anners
Ġdev iations
ĠRobot ics
ĠCom pton
Ġsorce rer
Ġend ogenous
Ġem ulation
ĠPier cing
ĠA ph
ĠS ocket
Ġb ould
ĠO U
ĠBorder lands
Ġ18 63
G ordon
ĠW TO
Ġrestrict s
Ġmosa ic
Ġmel odies
ç Ħ
T ar
Ġdis son
ĠProv ides
Ġ ......
b ek
F IX
Ġbro om
ans hip
Do ctors
Ġner ds
ĠReg ions
na issance
Ġmet e
Ġcre pt
pl ings
Ġgirlfriend s
kn it
ig ent
ow e
Ġus hered
ĠB az
M obil
4 34
ĠPres ents
orig in
Ġins omnia
ĠA ux
4 39
ĠCh ili
irs ch
G AME
Ġgest ation
alg ia
rom ising
$ ,
c row
ĠIn spection
at omic
Rel ations
J OHN
rom an
ĠClock work
ĠBak r
m one
M ET
Ġthirst y
Ġb c
Ġfacult ies
R um
Ġnu ance
ĠD arius
ple ting
fter s
etch up
Reg istration
ĠK E
R ah
Ġpref erential
ĠL ash
ĠH H
Val id
ĠN AV
Ġstar ve
ĠG ong
z ynski
ĠAct ress
Ġw ik
Ġun accompanied
lv l
Br ide
AD S
ĠCommand o
ĠVaugh n
Wal let
Ġho pping
ĠV ie
Ġcave ats
Ġal as
if led
ab use
66 1
Ġib n
Ġg ul
Ġrob bing
t il
IL A
Ġmit igating
Ġapt ly
Ġty rant
Ġmid day
ĠGil more
ĠDe cker
ĠÂ§ Â§
part ial
Ex actly
Ġphen otype
Ġ[+ ]
ĠP lex
ĠI ps
vers ions
Ġe book
Ġch ic
g ross
":" "},{"
ĠSur prisingly
M organ
Ġresid ues
ĠConf ederation
in feld
Ġl yr
mod erate
Ġperpend icular
V K
Ġsynchron ized
Ġrefres hed
Ġad ore
ĠTor ment
ol ina
Ġ26 00
Item Tracker
Ġp ies
ĠF AT
ĠR HP
0 48
ĠRES P
ĠB J
all ows
P and
Ġunw elcome
ĠV oc
ĠBast ard
ĠO W
ĠL AR
ĠHeal er
Environment al
ĠKen yan
ĠTr ance
ĠP ats
Ġali ases
ĠGar field
Ġcampaign er
Ġadvance ments
ĠOkin awa
ĠC oh
ows ky
Ġstar ved
Ġsize able
Ġ: -)
Ġm RNA
Ġsusp ensions
ist ar
Scot land
Pr in
-------------------------------- ----------------
Ġ50 2
Ġteasp oons
Ġ10 50
Ġcoerc ive
ĠMason ic
edd ed
ĠPass enger
Ġl att
Ġbr aces
ĠSt eal
ĠNY T
ĠK ats
ĠCel est
ae z
T u
ĠCoul ter
ðŁ ĺ
Fl ickr
ĠWil mington
ith s
++ ;
Ġv ending
Ġneg ro
ĠPh i
ĠYellow stone
Call back
Ġsh ampoo
ĠSh ades
w at
Ġsuper human
Ġridic uled
Ġhol iest
om bo
Ġintern s
Ġh one
ĠPar agu
UR I
Ġd angling
ãĤ »
so v
ict ional
av ailability
Ġrev ocation
Ġd ow
in ic
ĠTHE IR
Ġis o
Ġout ings
ĠLeth al
Ġ) ))
Ġinacc ur
Ġout landish
Ġan us
let ico
id on
l ol
Ġun regulated
Ġsuccumb ed
Ġc uff
ĠWast eland
let al
Ġsub str
Ġcoff ers
Ġautom akers
ov i
ĠX ue
ĠDayton a
Ġjar ring
Ġf umes
Ġdisband ed
z ik
itt on
Ġstriking ly
Ġsp ores
Ad apter
.) :
ĠLynd on
ival ry
Ġor ally
Ġtumult uous
Ġdisple asure
Ġcon es
or rect
Ġappe ase
Ġder by
ĠTrip oli
ĠAl ess
Ġp oked
ĠGu ilty
v P
En ough
Ġorig inals
6 99
Ġrabb i
Ġproverb ial
Ġpostp one
el ope
ĠMist y
Ġstaff ed
ĠUn employment
redit ary
Ġdilig ent
re comm
me asures
as in
8 25
Ġpond s
Ġmm ol
ĠS AR
ĠC ARE
Ġ3 71
Ġclen ched
ĠCors air
Ġcaric ature
z n
att ach
ĠSch ro
spe ak
p ainted
ĠS uc
ĠE NT
Ġcell ul
ĠP aid
di agn
WH ERE
Ġtext ed
B arn
Ġret racted
ĠRe ferred
S av
Ġup keep
Ġwork places
ĠTok ens
Ġampl ify
cl inical
Ġmult ic
mber g
Ġconvol uted
Reg ion
5 65
ĠTop ic
Ġsn ail
Ġsal ine
Ġins urrection
ĠPet r
f orts
B AT
ĠNav ajo
Ġrud imentary
ĠLak sh
OND ON
Me asure
Ġtransform er
ĠGodd ard
Ġcoinc ides
ir in
R ex
ĠB ok
qu it
Ġshotgun s
Ġprolet arian
Ġsc orp
ĠAd a
5 14
Ġsl ander
record ed
Ġemb ell
ris ome
Ġapolog izing
ĠMul cair
ĠGib raltar
Cl a
Ġall ot
ĠAtt ention
Ġ4 33
le ave
Ġwh ine
ĠIss a
ĠFa ust
ĠBar ron
hen y
Ġvictim ized
J ews
Ġnurt uring
ett el
W inged
ĠSub tle
Ġflavor ful
ĠRep s
eng ed
call back
Ġdirection al
Ġcl asp
ĠDirect ions
plan et
icult ure
Hel per
ic ion
ac ia
Ġç ¥ŀ
Ġsur ges
Ġcan oe
ĠPrem iership
be en
Ġdef ied
ĠTro oper
Ġtrip od
Ġgas p
ĠE uph
ĠAd s
vern ight
high ly
R ole
Ġent angled
ĠZe it
6 18
ĠRust y
Ġhaven s
ĠVaugh an
HA EL
ĠSER VICE
/ ,
Ġstr icken
Ġdel usions
Ġb is
ĠH af
Ġgrat ification
Ġent icing
UN CH
Ad ams
ĠOL ED
ĠBeet le
Ġ18 99
ĠSO FTWARE
ateg or
V L
ĠTot em
ĠG ators
AT URES
Ġimped ance
Reg istered
ĠC ary
ĠAer ial
on ne
en ium
Ġd red
ĠBe g
Ġconcurrent ly
Ġsuper power
ĠX an
j ew
imes ter
ĠDick inson
âĶ ģ
F la
Ġp ree
ĠRoll ins
© ¶æ
Ġden omination
ĠL ana
5 16
Ġinc iting
sc ribed
j uries
ĠWond ers
app roximately
Ġsusp ending
Ġmountain ous
ĠL augh
oid al
N s
Det ect
) =
ĠL uthor
ĠSchwarz enegger
ĠMull er
ĠDev i
ec ycle
J ar
6 13
ĠL ongh
B ah
ĠSP ORTS
n w
Ġref inement
Ġwater ways
Ġd iner
Bl ade
68 3
F ac
Ġinitial s
Ġro g
Ġparan ormal
B UT
Ġ[ (
ĠSw anson
ĠM esh
âĸ ¬
Impro ve
ĠRad iation
ĠEst her
ĠE sk
ĠA ly
ik y
Ġir rad
ĠBuck ingham
Ġref ill
Ġ. _
Re pe
CON CLUS
Ġdifferent iated
Ġchi rop
ĠAt kins
Pat tern
Ġexc ise
Ġcab al
N SA
ĠST A
ĠS IL
ĠPar aly
Ġr ye
ĠHow ell
ĠCount down
ness es
alys ed
Ġres ize
ãĤ ½
Ġbudget ary
ĠStr as
w ang
Ġap iece
Ġprecinct s
Ġpe ach
Ġsky line
Ġ35 3
pop ular
App earances
ĠMechan ics
ĠDev Online
S ullivan
Z en
Ġp u
op olis
5 44
Ġde form
Ġcounter act
ĠL ange
Ġ4 17
Con sole
77 4
Ġnodd ing
Ġpopul ism
Ġhe p
Ġcoun selling
compl iance
U FF
Ġunden iably
Ġrail ing
ĠHor owitz
ĠSim one
ĠBung ie
Ġa k
ĠTal ks
x ff
fl ake
Cr ash
Ġsweat y
Ġban quet
ĠOFF IC
Ġinvent ive
Ġastron omer
ĠStam ford
ĠSc are
ĠGRE EN
olic ited
Ġr usher
Ġcent rist
ight ing
Ġsub class
Ġdis av
Ġdef und
ĠN anto
oci ate
m ast
Ġpac if
Ġm end
e ers
imm igration
ESS ION
Ġnumber ing
Ġlaugh able
ĠEnd ed
v iation
em ark
P itt
Ġmetic ulous
ĠL F
Ġcongrat ulated
ĠBir ch
Ġsway ed
Ġsemif inals
Ġhum ankind
m atter
ĠEqu ip
opa usal
S aid
ĠLay out
Ġvo icing
Ġth ug
Ġporn ographic
I PS
Ġmo aning
Ġgriev ance
Ġconf essions
esc al
TEXT URE
Aut hent
os aurus
P urchase
Ġreleg ation
al ter
ĠÂł Âł
Ġr iddled
Ġo gre
ĠLow ell
Occ up
E at
ĠHy der
ĠAdvis er
Com merce
H unt
ĠOr th
ĠComp etitive
ĠCL A
CD C
Ġsal ads
F le
Ġindustrial ized
` ,
ĠO WN
Ġbec k
ĠPart icularly
oub t
Ġm M
ĠHuss ain
ĠChen nai
Ġ9 20
Ġappoint ing
ĠCull en
,,,, ,,,,
Ġp ores
ver ified
Ġbi ochemical
em ate
Ġcoward ly
ĠHels inki
ĠEthiop ian
S OURCE
ER C
est ro
Ġbi otech
ĠS our
Ġbrew er
Bloom berg
Ġintens ify
Gl ass
an co
ĠF DR
gre SQL
ĠF ires
©¶æ ¥µ
ec o
100 1
ĠHom eless
Ġinstant aneous
ĠH aste
ig el
D iamond
Ġp aving
Ġland fill
Ġd ads
h oun
: ]
Ġinc endiary
ĠLiving ston
ĠHil bert
ĠChe cks
st yles
in ators
ĠCl ive
ph rine
Ġchimpan zees
Ġp all
ĠJ M
ĠAad haar
ð Ŀ
Ġachie vable
dis abled
P ET
OOOO OOOO
M ot
Ġint angible
Ġbal let
ĠWe bs
ĠEst imated
Effect s
Ġb ailed
Josh ua
Ġturb ulence
Ġoccup ant
ĠDay light
Ġ36 1
me et
Ġstat ically
Ġon look
Ġk i
il legal
Ġvel vet
Ġdehyd ration
Ġacqu ies
ĠRe z
ak ura
ĠU pton
at ro
Ġincomp rehensible
Ġback door
ĠRh ino
7 27
Ġmath s
) +
Ġhe resy
Ġd f
ĠRoc he
ĠL ydia
Ġpanc reat
re ply
arre ll
Ġsolicit ation
Ġcirc adian
BI P
Ġfor ay
Ġcrypt ic
iz u
ime o
ĠTom ato
ĠH oms
ex amination
Ġqu arry
ĠVal iant
ĠJer icho
ĠIN CLUD
Ġ18 40
5 19
Ġres ists
Ġsnap shots
ĠSp ur
ĠAnt iqu
Log in
Ġbest selling
Ġant ic
ĠS utherland
ãĤ¢ ãĥ«
Ġ~ /
ĠP arm
è ĥ
P ages
int ensity
Ġimm obil
Ġ18 65
zz o
Ġn ifty
Ġf entanyl
ĠPres ervation
op hen
Ġd arts
ĠD inosaur
po inters
ĠR ite
s uggest
aware ness
ĠSher idan
Ġst ances
Ġsor cery
Ġper jury
ĠNik ola
ie ver
Ġf iance
ĠJordan ian
ĠBall oon
Ġn ab
Ġk b
Ġhuman ities
ĠTan aka
hill ary
Ġconsult ancy
ĠZ ub
Ġrem ission
Ġconf id
CH Q
ĠF ug
Ġimpro vis
Y ep
/ _
Ġunwilling ness
Ġport folios
05 5
ĠInstruct or
aim an
Ġclaim ants
M bps
ĠBy e
re ceived
T weet
Ġind emn
ri z
am ara
N at
Ġeval uates
ĠL ur
ep ad
FO X
ĠTh ro
Ġrust y
Ġbed rock
ĠOp rah
J B
Ġmanip ulative
Ġwill ful
Ġrel apse
Ġext ant
The me
S ensor
ĠSt ability
go vern
Ġpo ppy
Ġkn ack
Ġins ulated
ĠT ile
ĠExt rem
Ġunt old
Ġconver ge
Ġref uel
ig roup
Ġdistort ions
Ġrav aged
Ġmechan ically
ĠRe illy
ĠN ose
ĠIncarn ation
ĠBeck y
abb ling
Ġt aco
Ġr ake
Ġmelanch oly
Ġillust rious
ĠDart mouth
Gu ide
ĠR azer
ĠBen z
Ult imate
ĠSur prise
Ġpage ant
off er
Who ever
Ġw iser
Ġchem ist
ĠHE LL
ĠBul k
Ġpl utonium
ĠCO VER
Ö ¼
f ailed
Ġtire lessly
Ġinf ertility
ĠTr ident
ĠShow time
ĠC iv
V ice
requ ires
itt ance
Ġun controlled
interest ing
56 1
Ġinnov ate
ateg ic
L ie
ĠS elling
U l
Ġsav ior
ĠT osh
[truncated: 20,575 more chars]
