# Supplementary material
Source: ML conference proceedings conference paper supplement (https://aclanthology.org/2021.findings-acl.166)
Supplement: OptionalSupplementaryMaterial [file 2021.findings-acl.166.OptionalSupplementaryMaterial.zip › acl_supplement/data/Results/Text/RoBERTa/vocab.json]

{"<s>": 0, "<pad>": 1, "</s>": 2, "<unk>": 3, ".": 4, "Ġthe": 5, ",": 6, "Ġto": 7, "Ġand": 8, "Ġof": 9, "Ġa": 10, "Ġin": 11, "-": 12, "Ġfor": 13, "Ġthat": 14, "Ġon": 15, "Ġis": 16, "âĢ": 17, "'s": 18, "Ġwith": 19, "ĠThe": 20, "Ġwas": 21, "Ġ\"": 22, "Ġat": 23, "Ġit": 24, "Ġas": 25, "Ġsaid": 26, "Ļ": 27, "Ġbe": 28, "s": 29, "Ġby": 30, "Ġfrom": 31, "Ġare": 32, "Ġhave": 33, "Ġhas": 34, ":": 35, "Ġ(": 36, "Ġhe": 37, "ĠI": 38, "Ġhis": 39, "Ġwill": 40, "Ġan": 41, "Ġthis": 42, ")": 43, "ĠâĢ": 44, "Ġnot": 45, "Ŀ": 46, "Ġyou": 47, "ľ": 48, "Ġtheir": 49, "Ġor": 50, "Ġthey": 51, "Ġwe": 52, "Ġbut": 53, "Ġwho": 54, "Ġmore": 55, "Ġhad": 56, "Ġbeen": 57, "Ġwere": 58, "Ġabout": 59, ",\"": 60, "Ġwhich": 61, "Ġup": 62, "Ġits": 63, "Ġcan": 64, "Ġone": 65, "Ġout": 66, "Ġalso": 67, "Ġ$": 68, "Ġher": 69, "Ġall": 70, "Ġafter": 71, ".\"": 72, "/": 73, "Ġwould": 74, "'t": 75, "Ġyear": 76, "Ġwhen": 77, "Ġfirst": 78, "Ġshe": 79, "Ġtwo": 80, "Ġover": 81, "Ġpeople": 82, "ĠA": 83, "Ġour": 84, "ĠIt": 85, "Ġtime": 86, "Ġthan": 87, "Ġinto": 88, "Ġthere": 89, "t": 90, "ĠHe": 91, "Ġnew": 92, "ĠâĢĶ": 93, "Ġlast": 94, "Ġjust": 95, "ĠIn": 96, "Ġother": 97, "Ġso": 98, "Ġwhat": 99, "I": 100, "Ġlike": 101, "a": 102, "Ġsome": 103, "S": 104, "Ã«": 105, "Ġthem": 106, "Ġyears": 107, "'": 108, "Ġdo": 109, "Ġyour": 110, "Ġ-": 111, "Ġ1": 112, "\"": 113, "Ġif": 114, "Ġcould": 115, "?": 116, "Ġno": 117, "i": 118, "m": 119, "Ġget": 120, "ĠU": 121, "Ġnow": 122, "Ġhim": 123, "Ġback": 124, "ĠBut": 125, "ĠâĢĵ": 126, "Ġmy": 127, "Ġ'": 128, "Ġonly": 129, "Ġthree": 130, ";": 131, "Ġ2": 132, "The": 133, "1": 134, "Ġpercent": 135, "Ġagainst": 136, "Ġbefore": 137, "Ġcompany": 138, "o": 139, "ĠTrump": 140, "Ġhow": 141, "Ġbecause": 142, "Ġany": 143, "Ġmost": 144, "Ġbeing": 145, "Ġmake": 146, "Ġwhere": 147, "Ġduring": 148, "Ġthrough": 149, "Ġwhile": 150, "000": 151, "ĠThis": 152, "Ġmillion": 153, "ing": 154, "Ġ3": 155, "Ġmade": 156, "Ġwell": 157, "Ġ10": 158, "Ġdown": 159, "Ġoff": 160, "Ġsays": 161, "Ġme": 162, "ĠB": 163, "Ġgoing": 164, "Ġteam": 165, "ĠWe": 166, "Ġthose": 167, "Ġgovernment": 168, "Ġway": 169, "We": 170, "Ġmany": 171, "Ġthen": 172, "Ġwork": 173, "Ġtold": 174, "com": 175, "2": 176, "Ġgame": 177, "ĠAnd": 178, "in": 179, "year": 180, "Ġp": 181, "Ġvery": 182, "Ġday": 183, "Ġhome": 184, "Ġtake": 185, "Ġweek": 186, "Ġsince": 187, "ĠNew": 188, "Ġmay": 189, "Ġeven": 190, "Ġseason": 191, "Ġsee": 192, "Ġ2017": 193, "Ġstate": 194, "Ġ5": 195, "ed": 196, "Ġshould": 197, "Ġaround": 198, "Ġ2018": 199, "Ġsecond": 200, "Ġus": 201, "Ġstill": 202, "Ġmuch": 203, "Ġ4": 204, "Ġgood": 205, "Ġthink": 206, "%": 207, "ĠS": 208, "Ġthese": 209, "Ġmarket": 210, "ĠD": 211, "th": 212, "Ġgo": 213, "'re": 214, "Ġsuch": 215, "Ġknow": 216, "Ġincluding": 217, "Ġdon": 218, "y": 219, "Ġnext": 220, "ĠP": 221, "Ġdid": 222, "Ġunder": 223, "Ġsay": 224, "en": 225, "ĠL": 226, "Ġbetween": 227, "Ġper": 228, "ĠK": 229, "ĠC": 230, "Ġ6": 231, "Ġworld": 232, "Ġpart": 233, "ĠN": 234, "Ġright": 235, "Ġwant": 236, "Ġfour": 237, "),": 238, "Ġhigh": 239, "Ġneed": 240, "re": 241, "e": 242, "It": 243, "Ġhelp": 244, "5": 245, "3": 246, "Ġcountry": 247, "ĠR": 248, "Ġpolice": 249, "A": 250, "Ġlong": 251, "ĠThey": 252, "Ġend": 253, "er": 254, "ĠT": 255, "ĠM": 256, "u": 257, "Ġboth": 258, "Ġhere": 259, "an": 260, "on": 261, "Ġ7": 262, "Ġde": 263, "ĠShe": 264, "Ġbusiness": 265, "Ġreport": 266, "j": 267, "ers": 268, "Ġreally": 269, "ĠPresident": 270, "ar": 271, "ĠG": 272, "ĠFriday": 273, "ĠF": 274, "Ġbest": 275, "Ġsame": 276, "Ġanother": 277, "Ġset": 278, "old": 279, "ĠThat": 280, "as": 281, "n": 282, "Ġcome": 283, "Ġfamily": 284, "Ġpublic": 285, "ĠFor": 286, "ĠAs": 287, "0": 288, "ĠH": 289, "Ġ8": 290, "Ġ20": 291, "Ġfive": 292, "es": 293, "ĠTuesday": 294, "Ġn": 295, "ĠThursday": 296, "Ġquarter": 297, "h": 298, "Ġtop": 299, "Ġgot": 300, "Ġlife": 301, "ĠMonday": 302, "Ġfound": 303, "Ġuse": 304, "ĠW": 305, "4": 306, "ĠWednesday": 307, "Ġown": 308, "Ġaccording": 309, "Ġplay": 310, "Ġshow": 311, "ĠSt": 312, "Ġman": 313, "Ġleft": 314, "ĠUnited": 315, "Ġ12": 316, "Ġplace": 317, "ĠIf": 318, "Ġlot": 319, "Ġformer": 320, "Ġ0": 321, ").": 322, "Ġsupport": 323, "ie": 324, "Ġbillion": 325, "Ġt": 326, "Ġshares": 327, "!": 328, "z": 329, "k": 330, "ĠState": 331, "Ġpoints": 332, "Ġgroup": 333, "Ġschool": 334, "Ġinformation": 335, "Ġ2016": 336, "al": 337, "r": 338, "Ġwin": 339, "Ġnews": 340, "Ġused": 341, "Ġput": 342, "Ġcity": 343, "ĠJ": 344, "ĠThere": 345, "Ġnumber": 346, "C": 347, "'ve": 348, "Ġeach": 349, "Ġtoo": 350, "Ġwon": 351, "ly": 352, "Ġmonth": 353, "is": 354, "Ġadded": 355, "Ġlook": 356, "Ġbetter": 357, "Ġevery": 358, "Ġ&": 359, "Ġdays": 360, "Ġ9": 361, "Ġtook": 362, "Ġnight": 363, "Ġe": 364, "Ġ11": 365, "os": 366, "Ġfew": 367, "or": 368, "ĠNorth": 369, "ĠYou": 370, "Ġthird": 371, "Ġgreat": 372, "Ġcalled": 373, "ĠOn": 374, "Ġpast": 375, "Ġcame": 376, "Ġmonths": 377, "ĠSaturday": 378, "Ġ15": 379, "Ġbig": 380, "ĠE": 381, "ĠUS": 382, "Ġthings": 383, "ĠO": 384, "Ġd": 385, "Ġstart": 386, "B": 387, "Ġstock": 388, "Ġ30": 389, "Ġwomen": 390, "ĠSouth": 391, "ĠMay": 392, "Ġnever": 393, "Ġpresident": 394, "ĠSunday": 395, "Ġwithout": 396, "man": 397, "8": 398, "Ġdidn": 399, "Ġlocal": 400, "6": 401, "Ġsomething": 402, "Ġcase": 403, "ĠAll": 404, "it": 405, "7": 406, "ĠSo": 407, "Ġchildren": 408, "Ġaway": 409, "Ġlittle": 410, "Ġsix": 411, "ĠCity": 412, "ĠCounty": 413, "Ġdata": 414, "at": 415, "Ġalready": 416, "d": 417, "Ġmoney": 418, "Ġearly": 419, "Ġacross": 420, "Ġexpected": 421, "Ġrun": 422, "Ġlater": 423, "am": 424, "Ġprice": 425, "Ġgames": 426, "ĠMr": 427, "b": 428, "Ġmight": 429, "Ġdifferent": 430, "Ġreported": 431, "Ġdeal": 432, "Ġmedia": 433, "Ġgrowth": 434, "Ġcommunity": 435, "ĠChina": 436, "'m": 437, "c": 438, "Ġwent": 439, "ĠNo": 440, "Ġable": 441, "Ġmaking": 442, "Ġarea": 443, "Ġfar": 444, "Ġstatement": 445, "ĠHouse": 446, "Ġworking": 447, "M": 448, "Ġk": 449, "Ġseen": 450, "Ġcompanies": 451, "Ġtoday": 452, "Ġmembers": 453, "Ġuntil": 454, "Ġfull": 455, "Ġagain": 456, "Ġhalf": 457, "Ġshare": 458, "le": 459, "Ġalways": 460, "Ġcourt": 461, "l": 462, "and": 463, "Ġchange": 464, "Ġfind": 465, "9": 466, "Ġsystem": 467, "ĠV": 468, "ĠYork": 469, "ĠAmerican": 470, "Ġhead": 471, "Ġplayers": 472, "Ġdoes": 473, "Ġhealth": 474, "Ġm": 475, "Ġpower": 476, "Ġpoint": 477, "Ġhit": 478, "Ġ.": 479, "Ġ--": 480, "Ġfree": 481, ".,": 482, "Ġlead": 483, "Ġseveral": 484, "Ġrecent": 485, "Ġcall": 486, "N": 487, "Ġlaw": 488, "Ġkeep": 489, "Ġopen": 490, "ĠNews": 491, "Ġgive": 492, "ia": 493, "ĠMarch": 494, "D": 495, "ĠNational": 496, "ĠAt": 497, "Ġtimes": 498, "Ġfuture": 499, "R": 500, "Ġ14": 501, "ĠJune": 502, "Ġofficials": 503, "Ġ18": 504, "Ġimportant": 505, "f": 506, "Ġfinal": 507, "Ġ13": 508, "ĠOne": 509, "P": 510, "Ġfollowing": 511, "Ġcar": 512, "Ġleast": 513, "Ġwater": 514, "Ġevent": 515, "Ġline": 516, "Ġmove": 517, "Ġservices": 518, "Ġhaving": 519, "ĠWhen": 520, "Ġstudents": 521, "ĠPolice": 522, "el": 523, "Ġam": 524, "ĠZ": 525, "Ġside": 526, "Ġstory": 527, "Ġdue": 528, "Ġmeeting": 529, "K": 530, "Ġmust": 531, "ĠStates": 532, "Ġlikely": 533, "G": 534, "Ġcontinue": 535, "Ġago": 536, "Ġparty": 537, "Ġmajor": 538, "Ġindustry": 539, "Ġless": 540, "30": 541, "Ġun": 542, "Ġhard": 543, "Ġservice": 544, "Ġ16": 545, "Ġlooking": 546, "Ġheld": 547, "ve": 548, "Ġwhether": 549, "ĠJuly": 550, "Ġtaken": 551, "Ġalong": 552, "Ġasked": 553, "Ġstarted": 554, "Ġbecome": 555, "Ġforward": 556, "Ġresearch": 557, "Ġoffice": 558, "Ġpolitical": 559, "to": 560, "Ġtogether": 561, "Ġgetting": 562, "Ġplan": 563, "Ġ25": 564, "T": 565, "Ġamong": 566, "Ġcoming": 567, "Ġdecision": 568, "Ġvideo": 569, "Ġ2015": 570, "g": 571, "ĠAfter": 572, "Ġsecurity": 573, "L": 574, "Ġcare": 575, "Ġgiven": 576, "Ġavailable": 577, "âĢĶ": 578, "Ġs": 579, "ĠWest": 580, "'ll": 581, "Ġpay": 582, "Ġnear": 583, "Ġsaying": 584, "Ġannounced": 585, "Ġprogram": 586, "ĠApril": 587, "Ġreal": 588, "ĠUniversity": 589, "ĠWith": 590, "AP": 591, "Ġsocial": 592, "Ġclose": 593, "et": 594, "Ġcurrent": 595, "Ġwhy": 596, "F": 597, "ĠTo": 598, "ĠTwitter": 599, "Ġthough": 600, "Ġ17": 601, "Ġtaking": 602, "ĠInc": 603, "Ġmen": 604, "w": 605, "Ġcomes": 606, "ley": 607, "Ġdoing": 608, "Ġprocess": 609, "ĠJohn": 610, "ch": 611, "00": 612, "Ġfinancial": 613, "Ġlow": 614, "Ġenough": 615, "ĠWhile": 616, "Ġfurther": 617, "Ġpost": 618, "Ġfeel": 619, "st": 620, "Ġperson": 621, "ĠFacebook": 622, "ĠWorld": 623, "Ġwithin": 624, "ad": 625, "Ġdone": 626, "the": 627, "Ġlate": 628, "Ġtax": 629, "Ġdoesn": 630, "Ġthing": 631, "Ġnational": 632, "Ġjob": 633, "Ġusing": 634, "ĠHowever": 635, "ic": 636, "Ġcampaign": 637, "Ġrecord": 638, "Ġbehind": 639, "://": 640, "ĠDepartment": 641, "p": 642, "Ġothers": 643, "ĠJanuary": 644, "Ġorder": 645, "Ġ[": 646, "Ġsales": 647, "Ġyet": 648, "Ä": 649, "Ġsmall": 650, "Ġseries": 651, "Ġface": 652, "ĠWhat": 653, "Ġ50": 654, "Ġever": 655, "Ġearlier": 656, "Ġlove": 657, "up": 658, "Ġrights": 659, "ĠAn": 660, "ist": 661, "Ġmorning": 662, "ĠWashington": 663, "Ġyoung": 664, "Ġlatest": 665, "ĠIndia": 666, "Ġtrying": 667, "Ġfire": 668, "Ġled": 669, "Ġstrong": 670, "Ġreturn": 671, "Ġlevel": 672, "O": 673, "Ġaverage": 674, "Ġperiod": 675, "Ġexperience": 676, "ak": 677, "Ġpossible": 678, "Ġbelieve": 679, "Ġinclude": 680, "Ġoil": 681, "Ġrecently": 682, "Ġonce": 683, "Ġknown": 684, "Ġlost": 685, "Ġsure": 686, "us": 687, "Ġweeks": 688, "Ġfood": 689, "Ġreports": 690, "Ġrating": 691, "ĠMinister": 692, "Ġwoman": 693, "Ġprovide": 694, "Ġproject": 695, "Ġissue": 696, "Ġlive": 697, "10": 698, "Ġclear": 699, "he": 700, "Ġcost": 701, "Ġplayed": 702, "Ġreleased": 703, "Ġcoach": 704, "v": 705, "Ġ24": 706, "Ġseven": 707, "Ġplans": 708, "Ġdevelopment": 709, "ur": 710, "ĺ": 711, "Ġincrease": 712, "This": 713, "Ġpolicy": 714, "Ġcent": 715, "Ġbased": 716, "E": 717, "il": 718, "ĠDecember": 719, "Ġglobal": 720, "Ġtrade": 721, "Ġhours": 722, "Ġhigher": 723, "Ġgoal": 724, "H": 725, "ĠAl": 726, "Ġ100": 727, "Ġminutes": 728, "Ġelection": 729, "ĠAmerica": 730, "Ġrate": 731, "ĠCh": 732, "Ġ21": 733, "...": 734, "ĠWhite": 735, "Ġdirector": 736, "Ġposition": 737, "Ġshot": 738, "Ġlarge": 739, "Ġc": 740, "Ġb": 741, "]": 742, "Ġissues": 743, "Ġdeath": 744, "Ġbuilding": 745, "Ġtotal": 746, "Ġoften": 747, "Ġv": 748, "Ġcountries": 749, "Ġhistory": 750, "Ġoutside": 751, "Ġfederal": 752, "Ġ19": 753, "Ġfact": 754, "ĠHigh": 755, "Ġcareer": 756, "im": 757, "Ġinternational": 758, "ĠNovember": 759, "Ġfront": 760, "Ġkind": 761, "Ġkey": 762, "ra": 763, "ĠSan": 764, "Ġshort": 765, "Ġname": 766, "ĠAccording": 767, "Ġcourse": 768, "Ġre": 769, "Ġwanted": 770, "W": 771, "ĠSeptember": 772, "Ġinterest": 773, "Ġrole": 774, "Ġresults": 775, "Ġeconomic": 776, "Ġ2014": 777, "Ġchance": 778, "ĠOctober": 779, "Ġspecial": 780, "Ġofficial": 781, "Ġneeds": 782, "um": 783, "Ġl": 784, "Ġproducts": 785, "Ġnon": 786, "Ġ@": 787, "ĠBank": 788, "Ġahead": 789, "Ġhouse": 790, "U": 791, "Ġboard": 792, "Ġold": 793, "Ġsaw": 794, "Ġlower": 795, "ĠEuropean": 796, "Ġcontrol": 797, "ĠRussia": 798, "Ġeight": 799, "Ġrelease": 800, "Ġpotential": 801, "Ġthought": 802, "Ġinvestigation": 803, "Ġonline": 804, "based": 805, "Ġtechnology": 806, "ĠDonald": 807, "id": 808, "Ġbody": 809, "Ġrisk": 810, "ian": 811, "Ġcapital": 812, "Ġstaff": 813, "Ġaction": 814, "ĠLeague": 815, "Ġplaying": 816, "Ġmakes": 817, "Ġalmost": 818, "Ġperformance": 819, "Ġ22": 820, "Ġg": 821, "Ġfilm": 822, "Ġnearly": 823, "ĠCenter": 824, "Ġvisit": 825, "ĠGroup": 826, "Ġbank": 827, "Ġbit": 828, "Ġreceived": 829, "ĠAugust": 830, "Ġmilitary": 831, "ĠHis": 832, "ine": 833, "Ġchief": 834, "ĠSchool": 835, "Ġbring": 836, "ĠCourt": 837, "Ġ(@": 838, "Ġmeans": 839, "ĠSh": 840, "Ġfans": 841, "Ġse": 842, "Ġ40": 843, "20": 844, "\".": 845, "V": 846, "Ġcut": 847, "Ġkilled": 848, "Ġ#": 849, "Ġprices": 850, "Ġgave": 851, "ĠStreet": 852, "ir": 853, "ĠY": 854, "Ġcurrently": 855, "Ġf": 856, "ay": 857, "ne": 858, "te": 859, "Ġtry": 860, "ĠPark": 861, "ĥ": 862, "J": 863, "Ġquestion": 864, "Ġhand": 865, "Ġeconomy": 866, "Ġinvestors": 867, "able": 868, "Ġplayer": 869, "ĠBy": 870, "ĠDavid": 871, "Ġloss": 872, "ab": 873, "Ġbelow": 874, "Ġwrote": 875, "co": 876, "ate": 877, "Ġrunning": 878, "un": 879, "Ġbegan": 880, "Ġsingle": 881, "Ġfield": 882, "Ġ23": 883, "Ġleader": 884, "Ġw": 885, "ĠCalifornia": 886, "Ġfourth": 887, "Ġactually": 888, "Ġlist": 889, "ll": 890, "Ġcouple": 891, "Ġstudy": 892, "Ġteams": 893, "He": 894, "ah": 895, "ĠCanada": 896, "Ġla": 897, "Ġresult": 898, "Ġaccess": 899, "Ġvote": 900, "ĠMore": 901, "ĠFebruary": 902, "Ġrevenue": 903, "Ġoffer": 904, "Ġlet": 905, "ier": 906, "Ġbuy": 907, "Ġattack": 908, "Ġblack": 909, "Ġr": 910, "Ġareas": 911, "Ġstop": 912, "Ġimpact": 913, "Ġmatch": 914, "Ġinvestment": 915, "Ġcustomers": 916, "Ġleaders": 917, "ies": 918, "Ġmember": 919, "Ġchild": 920, "Ġroad": 921, "ul": 922, "Ġvalue": 923, "Ġshows": 924, "ĠDr": 925, "ĠDe": 926, "ant": 927, "ĠLondon": 928, "Ġroom": 929, "Ġmusic": 930, "Ġproduction": 931, "Ġanything": 932, "Ġfirm": 933, "Ġbiggest": 934, "Ġair": 935, "Ġproblem": 936, "Ġgeneral": 937, "Ġwasn": 938, "Ġi": 939, "Ġprivate": 940, "Ġespecially": 941, "Ġadministration": 942, "Ġadditional": 943, "ĠCo": 944, "Ġopportunity": 945, "Ġhold": 946, "&": 947, "Ġmatter": 948, "Ġsenior": 949, "Ġclub": 950, "Ġsomeone": 951, "ĠÃ": 952, "ĠEast": 953, "Ġ2019": 954, ".'": 955, "Ġneeded": 956, "ĠJames": 957, "time": 958, "Ġhowever": 959, "Ġeverything": 960, "Ġeveryone": 961, "Ġdied": 962, "Ġinvolved": 963, "Ġfriends": 964, "Ġisn": 965, "Ġworth": 966, "ik": 967, "ĠCup": 968, "Ġshowed": 969, "There": 970, "Ġ28": 971, "Ġmeet": 972, "Ġ26": 973, "Ġ27": 974, "Y": 975, "Ġregion": 976, "ĠPress": 977, "ĠNow": 978, "Ġson": 979, "Ġspace": 980, "Ġleading": 981, "Ġstates": 982, "Ġweekend": 983, "ĠÂ£": 984, "Ġmother": 985, "Ġprevious": 986, "ĠUK": 987, "ĠMichael": 988, "Ġleave": 989, "est": 990, "em": 991, "Ġz": 992, "ĠSome": 993, "ors": 994, "out": 995, "15": 996, "Ġwar": 997, "Ġwebsite": 998, "Ġstar": 999, "X": 1000, "ro": 1001, "Ġtarget": 1002, "Ġhimself": 1003, "Ġturn": 1004, "ĠEurope": 1005, "Ġworked": 1006, "Ġenergy": 1007, "Ġscored": 1008, "Ġ*": 1009, "Ġsoon": 1010, "Ġball": 1011, "ĠTV": 1012, "Ġannual": 1013, "Ġ2013": 1014, "Ġrace": 1015, "ĠInternational": 1016, "'d": 1017, "ĠMarket": 1018, "Ġconference": 1019, "io": 1020, "Ġo": 1021, "Ġchanges": 1022, "ig": 1023, "Ġofficers": 1024, "Ġinside": 1025, "Ġform": 1026, "Ġpublished": 1027, "Ġphone": 1028, "Ġco": 1029, "Ġlegal": 1030, "Ġexecutive": 1031, "Ġfight": 1032, "ings": 1033, "Ġhope": 1034, "Ġsummer": 1035, "Ġofficer": 1036, "Ġfootball": 1037, "Ġproperty": 1038, "@": 1039, "Ġbook": 1040, "Ġparents": 1041, "Ġcosts": 1042, "ac": 1043, "Ġmanager": 1044, "Ġcreate": 1045, "Ġage": 1046, "Ġemail": 1047, "Ġmarkets": 1048, "Ġmain": 1049, "Ġhuman": 1050, "Ġsent": 1051, "Ġmanagement": 1052, "ĠDay": 1053, "ton": 1054, "Ġcash": 1055, "Ġfocus": 1056, "Ġexpect": 1057, "Ġtraining": 1058, "Ġbecame": 1059, "Ġwhose": 1060, "Ġevents": 1061, "Ġround": 1062, "ĠLe": 1063, "Ġfell": 1064, "Ġabove": 1065, "Ġanalysts": 1066, "Ġtalk": 1067, "Ġsituation": 1068, "ri": 1069, "ated": 1070, "ke": 1071, "Ġwants": 1072, "ag": 1073, "Ġlives": 1074, "om": 1075, "Ġal": 1076, "Ġdemand": 1077, "Ġsafety": 1078, "Ġrest": 1079, "ĠCouncil": 1080, "Ġpersonal": 1081, "Ġsite": 1082, "ĠRussian": 1083, "Ġmid": 1084, "Ġnothing": 1085, "Ġwhole": 1086, "Ġbill": 1087, "Ġsold": 1088, "ĠBritish": 1089, "se": 1090, "Ġremain": 1091, "12": 1092, "Ġforeign": 1093, "Ġshooting": 1094, "Ġstay": 1095, "50": 1096, "ang": 1097, "Ġhospital": 1098, "Ġbad": 1099, "Ġaddress": 1100, "ĠKorea": 1101, "Ġhappened": 1102, "Ġcharges": 1103, "Ġwhite": 1104, "Ġ31": 1105, "If": 1106, "Ġearnings": 1107, "Ġbreak": 1108, "Ġlight": 1109, "Ġterms": 1110, "ĠChinese": 1111, "ĠSenate": 1112, "ana": 1113, "Ġidea": 1114, "ap": 1115, "of": 1116, "Ġnine": 1117, "Ġcompared": 1118, "Ġbuild": 1119, "ard": 1120, "In": 1121, "Ġsimilar": 1122, "Ġgas": 1123, "Ġvictory": 1124, "Ġ2012": 1125, "Ġdebt": 1126, "ĠMar": 1127, "Ġarrested": 1128, "Ġcomment": 1129, "Ġincreased": 1130, "Ġmedical": 1131, "Ġ29": 1132, "ĠJan": 1133, "Ġgroups": 1134, "Ġdespite": 1135, "Ġfall": 1136, "Ġtell": 1137, "Ġworkers": 1138, "Ġtown": 1139, "Ã©": 1140, "Ġwife": 1141, "Ġquestions": 1142, "Ġcontinued": 1143, "Ġheart": 1144, "Ġmet": 1145, "Ġbrought": 1146, "Ġhelped": 1147, "ĠCongress": 1148, "Ġstep": 1149, "Ġfather": 1150, "Ġmoment": 1151, "Ġproduct": 1152, "Ġprobably": 1153, "Ġlargest": 1154, "Ġvehicle": 1155, "ĠEngland": 1156, "Ġallow": 1157, "Ġstarting": 1158, "Ġkids": 1159, "Ġincident": 1160, "Ġnet": 1161, "Ġrates": 1162, "ĠRead": 1163, "Ġpressure": 1164, "Ġincluded": 1165, "Ġread": 1166, "Ġissued": 1167, "ol": 1168, "Ġeither": 1169, "Ġefforts": 1170, "Ġincludes": 1171, "ĠRepublican": 1172, "ish": 1173, "âĢ¦": 1174, "Ġgoals": 1175, "aj": 1176, "Ġen": 1177, "x": 1178, "Ġraised": 1179, "au": 1180, "Ġlonger": 1181, "ut": 1182, "Ġwatch": 1183, "ĠTexas": 1184, "You": 1185, "Ġrange": 1186, "nd": 1187, "Ġfunds": 1188, "Ġremains": 1189, "ĠMark": 1190, "Ġ60": 1191, "Ġque": 1192, "sh": 1193, "Ġinterview": 1194, "Ġrather": 1195, "Ġresidents": 1196, "Ġgrowing": 1197, "Ġpre": 1198, "Ġpaid": 1199, "Ġcases": 1200, "ĠReuters": 1201, "Ġdifficult": 1202, "Ġsign": 1203, "ĠGoogle": 1204, "Ġhttps": 1205, "ĠPaul": 1206, "Ġliving": 1207, "day": 1208, "ĠQ": 1209, "iz": 1210, "ĠRed": 1211, "Ġland": 1212, "They": 1213, "ĠRoad": 1214, "_": 1215, "ĠThese": 1216, "Ġview": 1217, "Ġagency": 1218, "Ġreason": 1219, "Ġallowed": 1220, "ĠAustralia": 1221, "az": 1222, "ĠRe": 1223, "Ġturned": 1224, "11": 1225, "Ġnation": 1226, "Ġready": 1227, "Ġpress": 1228, "Ġbudget": 1229, "Ġdaily": 1230, "ĠChief": 1231, "Ġfamilies": 1232, "Ġsignificant": 1233, "ĠFirst": 1234, "Ġthemselves": 1235, "Ġj": 1236, "Ġruns": 1237, "Ġaccused": 1238, "Ġtakes": 1239, "Ġspent": 1240, "Ġvia": 1241, "ot": 1242, "ina": 1243, "25": 1244, "land": 1245, "Ġexample": 1246, "Ġauthorities": 1247, "Ġdate": 1248, "Ġended": 1249, "all": 1250, "Reuters": 1251, "Ġbusinesses": 1252, "ans": 1253, "Ġdetails": 1254, "Ġground": 1255, "Ġpretty": 1256, "ĠApple": 1257, "ation": 1258, "ĠSmith": 1259, "ĠCompany": 1260, "ĠFlorida": 1261, "Ġdrug": 1262, "Ġresponse": 1263, "one": 1264, "Ġeducation": 1265, "Ġmean": 1266, "Ġleague": 1267, "Ġanyone": 1268, "Ġminister": 1269, "Ġtitle": 1270, "Ġadding": 1271, "Ġproblems": 1272, "Ġopening": 1273, "Ġconditions": 1274, "Ġred": 1275, "Ġdecided": 1276, "Å": 1277, "Ġposted": 1278, "term": 1279, "Ġamount": 1280, "ĠEU": 1281, "Ġsuccess": 1282, "Ġevidence": 1283, "ĠObama": 1284, "Ġaddition": 1285, "Ġprovided": 1286, "ĠLos": 1287, "Ġagreement": 1288, "Ġstage": 1289, "ens": 1290, "Ġrelationship": 1291, "ĠGeneral": 1292, "Ġsector": 1293, "Ġstudent": 1294, "ating": 1295, "Ġtest": 1296, "\",": 1297, "Ġwinning": 1298, "Ġfelt": 1299, "Ġsource": 1300, "Z": 1301, "Ġseems": 1302, "Ġcause": 1303, "Ġschools": 1304, "Ġdrive": 1305, "Ġensure": 1306, "Ġhuge": 1307, "ĠMy": 1308, "ĠHealth": 1309, "Ġscene": 1310, "Ġgiving": 1311, "Ġcenter": 1312, "Ġpositive": 1313, "Ġyards": 1314, "Ġjobs": 1315, "Ġaccount": 1316, "Ġheard": 1317, "Ġquality": 1318, "Ġways": 1319, "Ġimmediately": 1320, "Ġemployees": 1321, "are": 1322, "Ġpass": 1323, "ĠCEO": 1324, "Ġreceive": 1325, "Ġlooks": 1326, "ĠAfrica": 1327, "Ġthroughout": 1328, "led": 1329, "Ġrelated": 1330, "Ġsell": 1331, "ĠUnion": 1332, "ĠPhoto": 1333, "ter": 1334, "Ġquickly": 1335, "ĠHow": 1336, "Ġvarious": 1337, "Ġreach": 1338, "Ġpick": 1339, "Ġcharged": 1340, "Ġquite": 1341, "ent": 1342, "q": 1343, "ins": 1344, "Ġphoto": 1345, "Ġunderstand": 1346, "ĠâĢ¢": 1347, "Ġreached": 1348, "Ġtrack": 1349, "uk": 1350, "Ġeffort": 1351, "ville": 1352, "Ġcentral": 1353, "Ġdaughter": 1354, "Ġcontract": 1355, "Ġinjury": 1356, "Ġopened": 1357, "Ġ($": 1358, "Ġstraight": 1359, "17": 1360, "Ġcredit": 1361, "ĠIndian": 1362, "Ġsexual": 1363, "Ġworks": 1364, "Ġeasy": 1365, "18": 1366, "Ġclosed": 1367, "Ġh": 1368, "Ġhappen": 1369, "Ġforce": 1370, "ler": 1371, "Ġhappy": 1372, "Ġshared": 1373, "Ġoverall": 1374, "Ġmoving": 1375, "á": 1376, "Ġprojects": 1377, "ĠBlack": 1378, "Ġconcerns": 1379, "Ġclass": 1380, "Ġtried": 1381, "Ġappeared": 1382, "Ġcontent": 1383, "ĠDistrict": 1384, "Ġterm": 1385, "Ġinstead": 1386, "ĠOffice": 1387, "Ġcontinues": 1388, "Ġlevels": 1389, "Ġafternoon": 1390, "Ġfund": 1391, "Ġsale": 1392, "Ġdriver": 1393, "Ġask": 1394, "Ġcannot": 1395, "ner": 1396, "end": 1397, "ĠHere": 1398, "field": 1399, "Ġstore": 1400, "www": 1401, "Ġcertain": 1402, "Ġself": 1403, "Ġdollar": 1404, "ĠHer": 1405, "Ġpopular": 1406, "Ġfollow": 1407, "Ġspending": 1408, "by": 1409, "Ġmoved": 1410, "Ġgoes": 1411, "Ġcreated": 1412, "Ġstand": 1413, "Ġoperations": 1414, "Ġlooked": 1415, "Ġtreatment": 1416, "ov": 1417, "Ġdistrict": 1418, "Ġsigned": 1419, "Ġhands": 1420, "Ġmodel": 1421, "ĠAngeles": 1422, "Ġy": 1423, "Ġborder": 1424, "Ġincome": 1425, "ĠLast": 1426, "Ġcharge": 1427, "Ġdriving": 1428, "ĠJapan": 1429, "Ġrise": 1430, "Ġtalks": 1431, "Ġfollowed": 1432, "Ġpreviously": 1433, "Ġusers": 1434, "Ġfunding": 1435, "ĠJohnson": 1436, "Ġ": 1437, "ou": 1438, "ai": 1439, "Ġnamed": 1440, "Ġfriend": 1441, "ĠNov": 1442, "Ġdefense": 1443, "ĠBritain": 1444, "Ġentire": 1445, "Ġtrading": 1446, "Ġfailed": 1447, "ĠEl": 1448, "Ġclaims": 1449, "Ġcomments": 1450, "Ġbeat": 1451, "ib": 1452, "Ġbasis": 1453, "ĠJones": 1454, "Ġpresent": 1455, "ĠBe": 1456, "Ġdouble": 1457, "Ġrose": 1458, "ite": 1459, "Ġability": 1460, "Ġoriginal": 1461, "Ġdead": 1462, "ĠCommission": 1463, "ĠMe": 1464, "Ġcompetition": 1465, "Ġ2011": 1466, "Ġknew": 1467, "Ġmaterial": 1468, "av": 1469, "ĠFrance": 1470, "Ġscore": 1471, "Ġsense": 1472, "Ġserious": 1473, "Ġconfirmed": 1474, "Ġanti": 1475, "Ġviolence": 1476, "Ġimprove": 1477, "son": 1478, "Ã³": 1479, "ĠAP": 1480, "Ġsh": 1481, "Ġhost": 1482, "ĠMike": 1483, "Ġpatients": 1484, "ĠNFL": 1485, "Ġcrisis": 1486, "Ġrevealed": 1487, "ach": 1488, "ĠPrime": 1489, "Ġbuilt": 1490, "ĠNot": 1491, "Ġrules": 1492, "Ġelse": 1493, "Ġdepartment": 1494, "Ġitself": 1495, "ise": 1496, "500": 1497, "Ġcomplete": 1498, "ion": 1499, "Ġtrial": 1500, "ĠBay": 1501, "ĠDec": 1502, "Ġattention": 1503, "Ġtravel": 1504, "ĠCentral": 1505, "ry": 1506, "Ġagreed": 1507, "Ġmind": 1508, "ĠMc": 1509, "Ġ70": 1510, "Ġcontact": 1511, "ari": 1512, "ĠTimes": 1513, "Ġspot": 1514, "ĠFrench": 1515, "Ġgets": 1516, "op": 1517, "Ġbrand": 1518, "Ġcalls": 1519, "Ġbanks": 1520, "Ġdesign": 1521, "Ġsafe": 1522, "Ġoffers": 1523, "Ġpractice": 1524, "ĠOf": 1525, "Ã¡": 1526, "ling": 1527, "Ġtrue": 1528, "off": 1529, "Ġnumbers": 1530, "Ġfun": 1531, "Ġlearn": 1532, "Ġmultiple": 1533, "ĠIs": 1534, "res": 1535, "als": 1536, "Ġcommon": 1537, "ized": 1538, "Ġchallenge": 1539, "Ġcommittee": 1540, "ĠOur": 1541, "Ġbase": 1542, "ani": 1543, "ĠAssociation": 1544, "ung": 1545, "Ġnetwork": 1546, "ĠBrown": 1547, "Ġapproach": 1548, "16": 1549, "Ġfinished": 1550, "Ġreview": 1551, "Ġrequired": 1552, "Ġapp": 1553, "ĠMan": 1554, "ĠâĢ¦": 1555, "twitter": 1556, "ĠDemocratic": 1557, "13": 1558, "Ġevening": 1559, "ĠTom": 1560, "Ã¤": 1561, "ĠAssociated": 1562, "ĠCanadian": 1563, "Ġcollege": 1564, "Ġspokesman": 1565, "Ġarticle": 1566, "Ġtowards": 1567, "ĠChicago": 1568, "Ġmovie": 1569, "14": 1570, "ity": 1571, "Ġforces": 1572, "ĠChris": 1573, "ĠDemocrats": 1574, "Ġfeatures": 1575, "Ġhearing": 1576, "ĠX": 1577, "ĠAlso": 1578, "Ġmessage": 1579, "age": 1580, "Ġnoted": 1581, "ĠSuper": 1582, "Ġthousands": 1583, "aw": 1584, "ĠBill": 1585, "ĠAr": 1586, "ĠLa": 1587, "ip": 1588, "Ġ/": 1589, "ĠDuring": 1590, "Ġnote": 1591, ".)": 1592, "Ġwrong": 1593, "if": 1594, "Ġpassed": 1595, "ĠTwo": 1596, "Ġdie": 1597, ",'": 1598, "ĠDon": 1599, "ĠGermany": 1600, "Ġletter": 1601, "Ġdescribed": 1602, "ĠIran": 1603, "ĠWilliams": 1604, "Ġparticularly": 1605, "Ġadd": 1606, "Ġconversation": 1607, "ĠSe": 1608, "Ġhighest": 1609, "be": 1610, "Ġhomes": 1611, "Ġsports": 1612, "Ġgone": 1613, "ĠAd": 1614, "Ġel": 1615, "Ġopportunities": 1616, "Ġwords": 1617, "Ġleaving": 1618, "ĠChristmas": 1619, "As": 1620, "ĠGovernment": 1621, "Ġsimply": 1622, "Ġhusband": 1623, "ĠResearch": 1624, "ĠMexico": 1625, "ates": 1626, "ale": 1627, "ĠGreen": 1628, "$": 1629, "od": 1630, "ĠHall": 1631, "Ġnatural": 1632, "Ġoperating": 1633, "les": 1634, "ations": 1635, "ĠKim": 1636, "Ġgold": 1637, "ok": 1638, "Ġprovides": 1639, "(": 1640, "ell": 1641, "Ġbegin": 1642, "ĠParty": 1643, "back": 1644, "ĠAmazon": 1645, "19": 1646, "Ġmajority": 1647, "ĠEven": 1648, "Ġcheck": 1649, "Ġweather": 1650, "Ġorganization": 1651, "Ġstories": 1652, "ĠCar": 1653, "Ġforced": 1654, "ĠGeorge": 1655, "Ġwalk": 1656, "ong": 1657, "Ġfiled": 1658, "ĠJustice": 1659, "Ġlaunched": 1660, "Ġoffered": 1661, "Ġwww": 1662, "Ġconstruction": 1663, "ĠBen": 1664, "Ġserved": 1665, "Ġ...": 1666, "Ġparts": 1667, "Ġcancer": 1668, "Ġguys": 1669, "Reporting": 1670, "ash": 1671, "less": 1672, "Ġleadership": 1673, "ĠCommittee": 1674, "Ġregular": 1675, "Ġcouncil": 1676, "Ġcars": 1677, "ĠDirector": 1678, "Ġjudge": 1679, "Ġvictims": 1680, "ĠDaily": 1681, "Ġkept": 1682, "Ġeffect": 1683, "Ġbeyond": 1684, "pm": 1685, "Ġtalking": 1686, "Ġconsidered": 1687, "ore": 1688, "ĠAdvertisement": 1689, "Ġst": 1690, "ED": 1691, "Ġmiddle": 1692, "Ġraise": 1693, "we": 1694, "Ġclaimed": 1695, "ino": 1696, "Ġalleged": 1697, "ĠPro": 1698, "ĠScott": 1699, "ĠOct": 1700, "Ġconsider": 1701, "ĠShare": 1702, "Ġtraffic": 1703, "ĠAfrican": 1704, "Ġcouldn": 1705, "Ġtoward": 1706, "Ġsearch": 1707, "But": 1708, "Ġlaunch": 1709, "Ġinjured": 1710, "That": 1711, "Ġalthough": 1712, "Ġactivities": 1713, "Ġchanged": 1714, "Ġsources": 1715, "Ġmissing": 1716, "Ġu": 1717, "Ġ35": 1718, "Ġcover": 1719, "ised": 1720, "Ġ|": 1721, "ow": 1722, "ES": 1723, "Ġdecades": 1724, "ich": 1725, "Ġcaused": 1726, "Ġelections": 1727, "ane": 1728, "IS": 1729, "Ġfeet": 1730, "ĠBar": 1731, "Ġversion": 1732, "Ġgrow": 1733, "Ġvehicles": 1734, "Ġoptions": 1735, "Ġindividual": 1736, "Ġenvironment": 1737, "ĠRobert": 1738, "ĠValley": 1739, "ĠFrom": 1740, "per": 1741, "ara": 1742, "Ġsystems": 1743, "Ġprotect": 1744, "ĠKing": 1745, "Ġinjuries": 1746, "Ġfinally": 1747, "Ġnuclear": 1748, "40": 1749, "Ġratio": 1750, "Ġgun": 1751, "ĠPakistan": 1752, "ĠManagement": 1753, "ĠAir": 1754, "ce": 1755, "Ġopposition": 1756, "ment": 1757, "ick": 1758, "Ġpro": 1759, "Ġact": 1760, "Ġplatform": 1761, "Ġlack": 1762, "Ġpair": 1763, "Ġ500": 1764, "Ġcalling": 1765, "ary": 1766, "Ġprograms": 1767, "Ġscheduled": 1768, "Ġfast": 1769, "Ġjoined": 1770, "ĠWar": 1771, "ĠEditing": 1772, "ĠSince": 1773, "ĠRyan": 1774, "ĠMac": 1775, "ĠBig": 1776, "ĠLake": 1777, "Ġdigital": 1778, "When": 1779, "ue": 1780, "Ġassets": 1781, "Ġseeing": 1782, "ĠAct": 1783, "Ġpartner": 1784, "ĠBoard": 1785, "Ġbeginning": 1786, "Ġsupply": 1787, "Ġmiles": 1788, "Ġprison": 1789, "ons": 1790, "ĠAmericans": 1791, "ub": 1792, "ĠOr": 1793, "me": 1794, "Ġbenefits": 1795, "Ġbenefit": 1796, "Ġmeasures": 1797, "Ġhear": 1798, "Ġparties": 1799, "Ġsuccessful": 1800, "ĠJust": 1801, "Ġvictim": 1802, "Ġblock": 1803, "Ġlimited": 1804, "Ġtrip": 1805, "ĠPeople": 1806, "Ġserve": 1807, "Ġart": 1808, "ism": 1809, "Ġwide": 1810, "ĠSch": 1811, "Ġ80": 1812, "ĠThomas": 1813, "Ġ90": 1814, "Ġstocks": 1815, "Ġgirl": 1816, "ĠAsia": 1817, "Ġseeking": 1818, "Ġcertainly": 1819, "ĠServices": 1820, "ĠCollege": 1821, "Ġcommunities": 1822, "Ġextra": 1823, "Ġ2010": 1824, "ness": 1825, "Ġholding": 1826, "ous": 1827, "Ġtough": 1828, "ade": 1829, "Ġmobile": 1830, "Ġowns": 1831, "ĠDo": 1832, "ĠFire": 1833, "Ġspoke": 1834, "Ġreturned": 1835, "Ġsize": 1836, "Ġcriminal": 1837, "ĠInstagram": 1838, "Ġoffering": 1839, "ĠGod": 1840, "ĠService": 1841, "Ġpage": 1842, "her": 1843, "Ġdeep": 1844, "wood": 1845, "Ġcrime": 1846, "ĠSports": 1847, "ile": 1848, "ĠGlobal": 1849, "Ġproposed": 1850, "ain": 1851, "Ġsession": 1852, "ĠFederal": 1853, "ĠSyria": 1854, "Ġch": 1855, "Ġthreat": 1856, "Ġallegations": 1857, "ĠRepublicans": 1858, "ĠGerman": 1859, "Ġstrategy": 1860, "Ġcommercial": 1861, "ING": 1862, "ĠSecretary": 1863, "Q": 1864, "Ġreporters": 1865, "100": 1866, "ĠCapital": 1867, "ĠBoth": 1868, "ĠPost": 1869, "ĠIsrael": 1870, "Ġsave": 1871, "ts": 1872, "ill": 1873, "Ġdrop": 1874, "Ġreserved": 1875, "ĠMany": 1876, "Ġavoid": 1877, "Ġ200": 1878, "iv": 1879, "Ġdamage": 1880, "Ġcondition": 1881, "Ġdropped": 1882, "Ġdoor": 1883, "Ġplanning": 1884, "ire": 1885, "Ġcard": 1886, "Ġdesigned": 1887, "Ġreduce": 1888, "AN": 1889, "ĠUn": 1890, "ford": 1891, "ĠThen": 1892, "Ġpic": 1893, "ĠCopyright": 1894, "Ġrain": 1895, "ĠMartin": 1896, "Ġdomestic": 1897, "45": 1898, "ge": 1899, "Ġmurder": 1900, "Ġspeech": 1901, "line": 1902, "Ġhelping": 1903, "Ġplanned": 1904, "Ġfeature": 1905, "ud": 1906, "Ġtype": 1907, "ham": 1908, "ĠPublic": 1909, "ja": 1910, "Ġinsurance": 1911, "Ġattacks": 1912, "ĠCorp": 1913, "Ġforecast": 1914, "Ġresources": 1915, "ma": 1916, "?\"": 1917, "ĠAm": 1918, "ĠSept": 1919, "Ġpush": 1920, "Ġattorney": 1921, "23": 1922, "Ġemergency": 1923, "Ġwinner": 1924, "Ġblood": 1925, "Ġnorth": 1926, "ĠFeb": 1927, "Ġbaby": 1928, "Ġfloor": 1929, "Ġspend": 1930, "Ġex": 1931, "Ġdollars": 1932, "Ġunit": 1933, "ĠHill": 1934, "Ġder": 1935, "ĠAbout": 1936, "Ġalone": 1937, "ization": 1938, "Ġpresidential": 1939, "Ġactivity": 1940, "ĠTHE": 1941, "ee": 1942, "ber": 1943, "ĠOther": 1944, "Ġowner": 1945, "Ġhour": 1946, "Ġcities": 1947, "Ġanswer": 1948, "ide": 1949, "Ġfully": 1950, "ek": 1951, "ists": 1952, "Ġcoverage": 1953, "Ġvs": 1954, "Ġfigure": 1955, "Ġpopulation": 1956, "org": 1957, "Ġsnow": 1958, "Ġbecoming": 1959, "ĠSam": 1960, "ĠCarolina": 1961, "Ġjoin": 1962, "Ġprofit": 1963, "Ġitems": 1964, "Ġindex": 1965, "Ġanalysis": 1966, "Ġtournament": 1967, "Ġstake": 1968, "Ġperfect": 1969, "way": 1970, "Ġband": 1971, "Ġgirls": 1972, "Ġoption": 1973, "Ġplays": 1974, "oc": 1975, "Ġproviding": 1976, "ÃŃ": 1977, "24": 1978, "Ġwouldn": 1979, "Ġones": 1980, "Ġdeclined": 1981, "Ġwritten": 1982, "Ġvoters": 1983, "Ġcandidate": 1984, "Ġsuspect": 1985, "Ġpolicies": 1986, "Ġpeace": 1987, "ast": 1988, "Ġparticular": 1989, "for": 1990, "Ġhopes": 1991, "Ġstation": 1992, "ĠMost": 1993, "Ġspeak": 1994, "ĠRiver": 1995, "Ġasking": 1996, "Ġstatements": 1997, "Ġfifth": 1998, "ha": 1999, "ĠNigeria": 2000, "af": 2001, "Ġexplained": 2002, "Ġbar": 2003, "Ġhousing": 2004, "ĠSanta": 2005, "Ġidentified": 2006, "Ġsimple": 2007, "Ġcritical": 2008, "ĠClub": 2009, "ĠSecurity": 2010, "ĠLike": 2011, "Ġstarts": 2012, "art": 2013, "Ġstreet": 2014, "Ġreality": 2015, "Ġheavy": 2016, "Ġprogress": 2017, "Ġshowing": 2018, "Ġchallenges": 2019, "Ġban": 2020, "Ġcommitted": 2021, "35": 2022, "»": 2023, "Ġdirectly": 2024, "Ġaren": 2025, "Ġclaim": 2026, "ĠWestern": 2027, "ind": 2028, "Ġgives": 2029, "ĠSaudi": 2030, "Ġchoice": 2031, "ĠTh": 2032, "Ġapproved": 2033, "Ġlocated": 2034, "Ġarrived": 2035, "22": 2036, "Ġcaught": 2037, "Ġprofessional": 2038, "Ġmissed": 2039, "Ġculture": 2040, "ĠYear": 2041, "ĠOhio": 2042, "ĠLtd": 2043, "ĠAnother": 2044, "Ġseem": 2045, "Ġbelieves": 2046, "Ġbelieved": 2047, "Ġcharacter": 2048, "ĠAug": 2049, "red": 2050, "Ġfine": 2051, "Ġprior": 2052, "Ġthinking": 2053, "Ġhttp": 2054, "Ġ+": 2055, "Ġzone": 2056, "Ġputting": 2057, "Ġcrash": 2058, "ĠAustralian": 2059, "ĠAb": 2060, "Ġfocused": 2061, "ĠREUTERS": 2062, "ĠFox": 2063, "ĠSp": 2064, "Ġtraditional": 2065, "Ġanalyst": 2066, "Ġwait": 2067, "IT": 2068, "Ġrequest": 2069, "ru": 2070, "ians": 2071, "ize": 2072, "Ġfinish": 2073, "Ġlaws": 2074, "Ġran": 2075, "ER": 2076, "Ġsouth": 2077, "Ġspeed": 2078, "Ġmovement": 2079, "Ġassault": 2080, "Ġexchange": 2081, "Ġappear": 2082, "ĠSun": 2083, "Ġle": 2084, "Ġmaybe": 2085, "Ġlosing": 2086, "Ġsubject": 2087, "ive": 2088, "mer": 2089, "ĠBusiness": 2090, "ĠBl": 2091, "Ġappears": 2092, "Ġadvantage": 2093, "ĠLee": 2094, "ada": 2095, "ĠUnder": 2096, "Ġprevent": 2097, "Ġrespect": 2098, "Ġsex": 2099, "Ġcentre": 2100, "ĠJoe": 2101, "ado": 2102, "Ġtable": 2103, "Ġequipment": 2104, "Ġfair": 2105, "Ġtour": 2106, "Ġ32": 2107, "ĠFinancial": 2108, "Ġcounty": 2109, "Ġdevices": 2110, "Ġcustomer": 2111, "Ġinfrastructure": 2112, "Ġexpectations": 2113, "Ġfacing": 2114, "Ġupon": 2115, "Ġcross": 2116, "ĠOpen": 2117, "AL": 2118, "Ġquick": 2119, "Ġattempt": 2120, "Ġcompleted": 2121, "Ġfacility": 2122, "Ġconfidence": 2123, "ĠSupreme": 2124, "Ġpiece": 2125, "our": 2126, "Ġplaces": 2127, "Ġsometimes": 2128, "Ġpoor": 2129, "Ġstorm": 2130, "Ġhot": 2131, "Ġaffected": 2132, "na": 2133, "Ġabuse": 2134, "ĠMs": 2135, "Ġword": 2136, "over": 2137, "Ġbrother": 2138, "Ġnecessary": 2139, "Ġeventually": 2140, "ĠStar": 2141, "Ġsend": 2142, "Ġboy": 2143, "ĠRs": 2144, "Ġremember": 2145, "21": 2146, "Ġclimate": 2147, "Ġcapacity": 2148, "Ġresponsible": 2149, "ĠMatt": 2150, "month": 2151, "Ġsuffered": 2152, "%.": 2153, "og": 2154, "ĠPeter": 2155, "Ġ,": 2156, "Ġfeeling": 2157, "ze": 2158, "Ġbuying": 2159, "oy": 2160, "ij": 2161, "Ġbought": 2162, "Ġactions": 2163, "Ġowned": 2164, "Ġ___": 2165, "Ġphysical": 2166, "Ġspecific": 2167, "Ġbattle": 2168, "ĠEnergy": 2169, "Ġpicture": 2170, "Ġactive": 2171, "Ġindividuals": 2172, "Ġguy": 2173, "Ġregional": 2174, "Ġbond": 2175, "ows": 2176, "ĠToronto": 2177, "Ġrule": 2178, "Ġdevelop": 2179, "Ġcrowd": 2180, "Ġguilty": 2181, "Ġfemale": 2182, "Ġselling": 2183, "ĠFollow": 2184, "Ġmyself": 2185, "ata": 2186, "Ġdevice": 2187, "Ġreasons": 2188, "Ġrecords": 2189, "Ġfighting": 2190, "ON": 2191, "ities": 2192, "ĠHome": 2193, "Ġstatus": 2194, "Ġplant": 2195, "Ġdrugs": 2196, "ĠChurch": 2197, "Ġcompletely": 2198, "Ġdisease": 2199, "Ġhighly": 2200, "ĠParis": 2201, "Ġdecade": 2202, "Ġowners": 2203, "Ġwall": 2204, "Ġcamp": 2205, "ĠSteve": 2206, "Ġreporting": 2207, "Ġearned": 2208, "ĠImages": 2209, "Ġexisting": 2210, "ĠSen": 2211, "Ġconcern": 2212, "Ġhundreds": 2213, "Ġsong": 2214, "Ġknows": 2215, "Ġunique": 2216, "Ġlose": 2217, "ĠKh": 2218, "Ġapproximately": 2219, "Ġhaven": 2220, "Ġpark": 2221, "Ġindependent": 2222, "ĠAlthough": 2223, "ĠAndrew": 2224, "Ġpaper": 2225, "Ġdeveloped": 2226, "Ġrising": 2227, "Ġdirect": 2228, "Ġpurchase": 2229, "Ġexactly": 2230, "Ġq": 2231, "Ġmassive": 2232, "Ġbox": 2233, "Ġchampion": 2234, "ĠClinton": 2235, "Ġvoice": 2236, "Ġarrest": 2237, "ĠKorean": 2238, "Ġlearning": 2239, "ĠVirginia": 2240, "Ġsa": 2241, "Ġpar": 2242, "Ġchairman": 2243, "Ġagencies": 2244, "Ġhealthy": 2245, "ĠThose": 2246, "Ġpowerful": 2247, "Ġ45": 2248, "Ġdifference": 2249, "ĠJackson": 2250, "Ġenforcement": 2251, "Ġdividend": 2252, "qu": 2253, "Ġenjoy": 2254, "Ġruling": 2255, "Ġongoing": 2256, "Ġsoftware": 2257, "ks": 2258, "Ġlocation": 2259, "Ġmostly": 2260, "Ġcandidates": 2261, "men": 2262, "Ġbroke": 2263, "What": 2264, "ĠBr": 2265, "Ġ2008": 2266, "Ġconsumer": 2267, "Ġdiscuss": 2268, "Ġdi": 2269, "Ġprimary": 2270, "ĠEn": 2271, "Ġgreen": 2272, "Ġconcerned": 2273, "Ġimage": 2274, "ĠPremier": 2275, "ĠMeanwhile": 2276, "Ġfired": 2277, "ĠBoston": 2278, "ann": 2279, "Ġcamera": 2280, "Ġtraded": 2281, "Ġhasn": 2282, "Ġexcited": 2283, "Ġincreasing": 2284, "ĠDespite": 2285, "Ġcitizens": 2286, "Ġeuro": 2287, "Ġreportedly": 2288, "Ġminute": 2289, "ĠWill": 2290, "ĠLLC": 2291, "Ġsp": 2292, "ĠMichigan": 2293, "Ġstopped": 2294, "Ġeye": 2295, "Ġdenied": 2296, "Ġmodern": 2297, "ĠWall": 2298, "Ġdefinitely": 2299, "point": 2300, "Ġlines": 2301, "Ġpolitics": 2302, "Ġhotel": 2303, "Ġretail": 2304, "Ġstated": 2305, "ĠOver": 2306, "Ġgrew": 2307, "Ġbroadcast": 2308, "Ġlegislation": 2309, "Ġfresh": 2310, "Ġbid": 2311, "Ġmanaged": 2312, "Ġsociety": 2313, "Ġscoring": 2314, "ĠGet": 2315, "Ġintelligence": 2316, "Ġholiday": 2317, "Ġgovernor": 2318, "Ġestimated": 2319, "Ġexperts": 2320, "ĠJeff": 2321, "Ġstruck": 2322, "Ġhits": 2323, "Ġcarry": 2324, "Ġplaced": 2325, "Ġstores": 2326, "Ġexpressed": 2327, "Ġvalued": 2328, "Ġad": 2329, "Ġtwice": 2330, "ala": 2331, "Ġdisplay": 2332, "Ġusually": 2333, "Ġresponded": 2334, "Ġdog": 2335, "AS": 2336, "ĠFed": 2337, "Ġ2009": 2338, "Ġdocuments": 2339, "Ġnormal": 2340, "Ġtrain": 2341, "Ġfl": 2342, "Ġshown": 2343, "ĠEd": 2344, "Ġsort": 2345, "Ġallegedly": 2346, "Ġshots": 2347, "ka": 2348, "Ġaccounts": 2349, "Ġyesterday": 2350, "Ġcreating": 2351, "Ġchurch": 2352, "Ġbus": 2353, "Ġaward": 2354, "Ġequity": 2355, "Ġphotos": 2356, "Ġ33": 2357, "Ġfiscal": 2358, "je": 2359, "Ġconsumers": 2360, "ĠManchester": 2361, "no": 2362, "ĠKevin": 2363, "Ġgain": 2364, "Ġcorporate": 2365, "Ġcivil": 2366, "ĠMiddle": 2367, "ally": 2368, "Ġsound": 2369, "ĠEnglish": 2370, "IC": 2371, "Ġwinds": 2372, "Ġworst": 2373, "ĠGrand": 2374, "Ġeffective": 2375, "ĠIsland": 2376, "Ġdrivers": 2377, "Ġfan": 2378, "pe": 2379, "Ġsides": 2380, "ĠGo": 2381, "Ġclean": 2382, "âĢĵ": 2383, "Ġtelevision": 2384, "ĠJr": 2385, "Ġallows": 2386, "My": 2387, "Ġgreater": 2388, "ance": 2389, "Ġdecisions": 2390, "Ġrestaurant": 2391, "ĠHospital": 2392, "ĠTr": 2393, "Ġbalance": 2394, "Ġmph": 2395, "Ġkeeping": 2396, "Ġseconds": 2397, "Ġweapons": 2398, "ert": 2399, "Ġpain": 2400, "ass": 2401, "Ġsteps": 2402, "ger": 2403, "ĠBrexit": 2404, "Ġremaining": 2405, "Ġbringing": 2406, "ure": 2407, "Ġweight": 2408, "And": 2409, "Ġwriting": 2410, "Photo": 2411, "ĠChristian": 2412, "ob": 2413, "Ġsport": 2414, "Ġfigures": 2415, "Ġtrust": 2416, "Ġskills": 2417, "Ġseat": 2418, "Ġfaces": 2419, "ck": 2420, "Ġborn": 2421, "Ġsuper": 2422, "Ġfuel": 2423, "Ġdel": 2424, "Ġmeant": 2425, "ica": 2426, "Ġjustice": 2427, "Ġspring": 2428, "Ġkilling": 2429, "Ġnegative": 2430, "ĠRichard": 2431, "Ġund": 2432, "Ġfactors": 2433, "Ġsigns": 2434, "Ġlearned": 2435, "ĠGame": 2436, "Ġaudience": 2437, "Ġdeliver": 2438, "Ġillegal": 2439, "Ġblue": 2440, "Ġscreen": 2441, "Ġremained": 2442, "Ġannouncement": 2443, "IN": 2444, "Ġwaiting": 2445, "Ġthanks": 2446, "Ġimmigration": 2447, "ĠFBI": 2448, "Ġwarned": 2449, "Ġmeasure": 2450, "Ġdraw": 2451, "Ġpositions": 2452, "Ġdebut": 2453, "ĠMedia": 2454, "Ġallowing": 2455, "air": 2456, "hen": 2457, "Ġmark": 2458, "ys": 2459, "Ġprepared": 2460, "ĠVegas": 2461, "ep": 2462, "ice": 2463, "2018": 2464, "Ġdefensive": 2465, "60": 2466, "ĠBeach": 2467, "Ġpulled": 2468, "£": 2469, "Ġlawyer": 2470, "Ġcast": 2471, "Ġsolution": 2472, "Ġeyes": 2473, "Ġmarketing": 2474, "ĠFoundation": 2475, "Ġrisks": 2476, "ĠToday": 2477, "za": 2478, "Ġdraft": 2479, "Ġice": 2480, "26": 2481, "ĠHar": 2482, "ĠExecutive": 2483, "Ġtruck": 2484, "ions": 2485, "ĠYour": 2486, "ĠIreland": 2487, "ĠJim": 2488, "Ġha": 2489, "Ġfear": 2490, "Ġ36": 2491, "UR": 2492, "ĠFord": 2493, "Ġwatching": 2494, "ien": 2495, "Ġstyle": 2496, "ĠGood": 2497, "Ġwearing": 2498, "ĠHouston": 2499, "Ġonto": 2500, "Ġboost": 2501, "Ġapplication": 2502, "ĠDan": 2503, "Ġspread": 2504, "ĠDavis": 2505, "Ġstrike": 2506, "els": 2507, "Ġwind": 2508, "Ġinterested": 2509, "Ġguard": 2510, "Ġmission": 2511, "Ġyourself": 2512, "Ġoperation": 2513, "Ġlarger": 2514, "She": 2515, "Ġseasons": 2516, "28": 2517, "27": 2518, "Ġrespond": 2519, "ci": 2520, "ĠCentre": 2521, "Our": 2522, "Ġnames": 2523, "Ġflight": 2524, "Ġquarterback": 2525, "Ġstandard": 2526, "so": 2527, "Ġsuggested": 2528, "ĠMal": 2529, "Ġolder": 2530, "ini": 2531, "Ġperhaps": 2532, "ont": 2533, "ĠInstitute": 2534, "Ġmillions": 2535, "Ġmental": 2536, "ÃĤ": 2537, "ga": 2538, "Ġclients": 2539, "Ġplease": 2540, "Ġloan": 2541, "Ġaware": 2542, "ft": 2543, "int": 2544, "75": 2545, "05": 2546, "AY": 2547, "ĠOut": 2548, "Ġhair": 2549, "ied": 2550, "Ġseemed": 2551, "ene": 2552, "ty": 2553, "NYSE": 2554, "Ġoffensive": 2555, "Ġtaxes": 2556, "Ġinitial": 2557, "ren": 2558, "Ġseparate": 2559, "la": 2560, "ĠMiami": 2561, "AC": 2562, "Ġclearly": 2563, "Ġfit": 2564, "ĠCoast": 2565, "Ġfirms": 2566, "Ġpartners": 2567, "Ġupcoming": 2568, "Ġcold": 2569, "Ġproposal": 2570, "AT": 2571, "Ġshut": 2572, "ĠCommunity": 2573, "Ġnature": 2574, "ĠSal": 2575, "Ġbottom": 2576, "ting": 2577, "ĠClick": 2578, "Ġnice": 2579, "ets": 2580, "Ġhurt": 2581, "itt": 2582, "ama": 2583, "Ġcarried": 2584, "ĠCon": 2585, "rd": 2586, "Ġestate": 2587, "ĠLas": 2588, "ĠLaw": 2589, "ng": 2590, "Ġprotection": 2591, "Ġproduce": 2592, "Ġcurrency": 2593, "Ġhappens": 2594, "ĠPer": 2595, "ney": 2596, "ĠLong": 2597, "Ġfellow": 2598, "Ġcuts": 2599, "Ġreading": 2600, "ano": 2601, "Ġproud": 2602, "ost": 2603, "ĠUN": 2604, "ĠArizona": 2605, "AD": 2606, "Ġhelps": 2607, "Ġwinter": 2608, "Ġfinding": 2609, "ĠGold": 2610, "att": 2611, "ĠWhy": 2612, "Ġbasketball": 2613, "lin": 2614, "ĠCan": 2615, "ĠBowl": 2616, "ial": 2617, "ĠAlex": 2618, "200": 2619, "AM": 2620, "Ġpresence": 2621, "Ġproduced": 2622, "Ġdeveloping": 2623, "Ġregarding": 2624, "Ġdebate": 2625, "Ġvice": 2626, "ĠItaly": 2627, "Ġsu": 2628, "its": 2629, "ator": 2630, "Ġ34": 2631, "Ġcomplex": 2632, "Ġpresented": 2633, "Ġresearchers": 2634, "Ġslow": 2635, "ya": 2636, "Ġsanctions": 2637, "Ġloved": 2638, "Ġseek": 2639, "Ġresponsibility": 2640, "Ġadmitted": 2641, "Ġalbum": 2642, "Ġsolutions": 2643, "Ġfacilities": 2644, "ett": 2645, "ĠGu": 2646, "ĠWell": 2647, "Ġlawmakers": 2648, "Ġmiss": 2649, "ful": 2650, "ĠNick": 2651, "'.": 2652, "Ġfeels": 2653, "Ġprime": 2654, "Ġknowledge": 2655, "Ġdeals": 2656, "ĠTaylor": 2657, "Ġsurvey": 2658, "ĠFrancisco": 2659, "Ġjoint": 2660, "Ġwhom": 2661, "Ġsit": 2662, "01": 2663, "Ġtr": 2664, "Ġorganizations": 2665, "ĠAvenue": 2666, "ĠTheir": 2667, "ĠTim": 2668, "Ġrally": 2669, "game": 2670, "Ġbigger": 2671, "Ġlawsuit": 2672, "Ġrecorded": 2673, "Ġfavorite": 2674, "yard": 2675, "Ġtransaction": 2676, "Ġqu": 2677, "oh": 2678, "Ġinteresting": 2679, "Ġinflation": 2680, "ath": 2681, "Ġstuff": 2682, "Ġindustrial": 2683, "ico": 2684, "TS": 2685, "Ġspeaking": 2686, "Ġlosses": 2687, "ID": 2688, "ĠStadium": 2689, "Ġstars": 2690, "ĠWomen": 2691, "ĠBlue": 2692, "Ġwins": 2693, "Ġdes": 2694, "Ġcompetitive": 2695, "ters": 2696, "Ġpounds": 2697, "Ġdirection": 2698, "Ġinnings": 2699, "ĠBest": 2700, "Ġactor": 2701, "Ġdangerous": 2702, "Ġrequire": 2703, "Ġplus": 2704, "Ġsolid": 2705, "Ġgeneration": 2706, "Ġstrength": 2707, "ĠMary": 2708, "For": 2709, "Ġplenty": 2710, "ĠTeam": 2711, "Ġinfluence": 2712, "Ġfaced": 2713, "Ġes": 2714, "ĠIslamic": 2715, "let": 2716, "ĠDevelopment": 2717, "Ġpath": 2718, "Ġyouth": 2719, "Ġcommitment": 2720, "Ġbeautiful": 2721, "ĠJack": 2722, "ort": 2723, "Ġten": 2724, "Ġattend": 2725, "ars": 2726, "Ã³n": 2727, "Ġviews": 2728, "Ġeuros": 2729, "Ġauthor": 2730, "Ġcore": 2731, "Ġsupporters": 2732, "ĠiPhone": 2733, "Ġfashion": 2734, "Ġsmaller": 2735, "Ġelected": 2736, "Ġuniversity": 2737, "Ġpicked": 2738, "wa": 2739, "Ġordered": 2740, "ĠSc": 2741, "ĠÅ": 2742, "Ġlargely": 2743, "+": 2744, "ĠAttorney": 2745, "Ġpaying": 2746, "AR": 2747, "Ġconnection": 2748, "Ġsetting": 2749, "Ġna": 2750, "ĠRock": 2751, "Ġrecovery": 2752, "ew": 2753, "Ġserving": 2754, "Ġsurprise": 2755, "Ġoccurred": 2756, "Ġdivision": 2757, "Ġtelling": 2758, "Ġmargin": 2759, "Ġ2020": 2760, "Ġsister": 2761, "ĠNBA": 2762, "Ġvoted": 2763, "Ġcon": 2764, "By": 2765, "Ġ49": 2766, "Ġfoot": 2767, "Ã¼": 2768, "ĠTurkey": 2769, "Ġamazing": 2770, "Ġcombined": 2771, "Ġappearance": 2772, "Ġeasily": 2773, "DAY": 2774, "Ġnotes": 2775, "ĠStart": 2776, "Ġlanguage": 2777, "Ġextremely": 2778, "Ġcloudy": 2779, "ĠLet": 2780, "Ġdelivered": 2781, "Ġimproved": 2782, "Ġcollection": 2783, "ĠPM": 2784, "Ġestimates": 2785, "Ġboys": 2786, "izing": 2787, "Ġtext": 2788, "Ġcloser": 2789, "Ġprotest": 2790, "Ġprovince": 2791, "Ġshop": 2792, "Ġsmart": 2793, "de": 2794, "ĠSheriff": 2795, "EN": 2796, "Ġcorner": 2797, "Ġpanel": 2798, "Ġbooks": 2799, "Ġsupported": 2800, "Ġmentioned": 2801, "ver": 2802, "ĠMinistry": 2803, "ĠPrince": 2804, "ĠUSA": 2805, "Ġreceiving": 2806, "Ġchoose": 2807, "ĠIN": 2808, "ĠSpain": 2809, "Ġsection": 2810, "Ġconsidering": 2811, "ĠCor": 2812, "Ġwish": 2813, "Ġwelcome": 2814, "ĠConference": 2815, "ere": 2816, "ĠOfficer": 2817, "Ġhoping": 2818, "Ġportfolio": 2819, "Ġstandards": 2820, "Ġgrand": 2821, "ĠReal": 2822, "Ġsecure": 2823, "ĠCorporation": 2824, "ĠRep": 2825, "ĠKelly": 2826, "Ġstreets": 2827, "Ġsitting": 2828, "Ġslightly": 2829, "ĠInvestment": 2830, "99": 2831, "ond": 2832, "Ġunits": 2833, "Ġvotes": 2834, "Ġsegment": 2835, "Ġchampionship": 2836, "Ġsquad": 2837, "iting": 2838, "ron": 2839, "®": 2840, "Ġem": 2841, "Ġtouch": 2842, "Ġ38": 2843, "Ġceremony": 2844, "Ġdecide": 2845, "Ġapproval": 2846, "So": 2847, "ĠPort": 2848, "Ġsub": 2849, "Ġsc": 2850, "Ġrep": 2851, "ĠWeek": 2852, "Ġupper": 2853, "Ġagree": 2854, "ny": 2855, "Ġmatches": 2856, "ics": 2857, "Ġtweeted": 2858, "Ġheat": 2859, "ĠGreat": 2860, "Ġpenalty": 2861, "Ġmass": 2862, "Ġalongside": 2863, "Ġherself": 2864, "berg": 2865, "Ġscience": 2866, "Ġentered": 2867, "Ġappeal": 2868, "ĠPr": 2869, "Ġfile": 2870, "che": 2871, "ĠReport": 2872, "ĠThree": 2873, "ĠNorthern": 2874, "ĠJordan": 2875, "Ġamid": 2876, "Ġpace": 2877, "Ġjail": 2878, "Ġfinance": 2879, "ĠYoung": 2880, "32": 2881, "Ġwilling": 2882, "Ġconduct": 2883, "ĠPar": 2884, "Ġestablished": 2885, "Ġreturns": 2886, "Ġaid": 2887, "Ġinternet": 2888, "IA": 2889, "29": 2890, "Ġmeetings": 2891, "Ġwarning": 2892, "ĠCl": 2893, "Ġcampus": 2894, "Most": 2895, "ĠFund": 2896, "ĠWilliam": 2897, "ĠJapanese": 2898, "Ġconsensus": 2899, "Ġbrain": 2900, "!\"": 2901, "Ġpoll": 2902, "Ġtech": 2903, "Ġtrend": 2904, "Ġpotentially": 2905, "Ġreduced": 2906, "ĠShow": 2907, "Ġ37": 2908, "Ġhappening": 2909, "ĠBrazil": 2910, "pl": 2911, "ĠCal": 2912, "Ġcovered": 2913, "Ġenter": 2914, "TV": 2915, "Ġcatch": 2916, "foot": 2917, "Ġunion": 2918, "Ġexpansion": 2919, "ĠSingapore": 2920, "ĠDetroit": 2921, "Ġattended": 2922, "ats": 2923, "Ġnewspaper": 2924, "ĠDivision": 2925, "news": 2926, "Ġcap": 2927, "Ġremoved": 2928, "Ġ48": 2929, "ĠRoyal": 2930, "Ġwindow": 2931, "Ġparking": 2932, "Ġdark": 2933, "Ġstanding": 2934, "Ġupdate": 2935, "Ġagent": 2936, "Ġtransfer": 2937, "ĠArmy": 2938, "Ġuses": 2939, "80": 2940, "ĠTe": 2941, "Ġintroduced": 2942, "Ġmale": 2943, "ĠSouthern": 2944, "Ġratings": 2945, "Ġisland": 2946, "ĠMiller": 2947, "Ġteachers": 2948, "Ġadvice": 2949, "Ġfamiliar": 2950, "uf": 2951, "Ġsought": 2952, "Ġpor": 2953, "ĠEric": 2954, "Ġda": 2955, "Ġideas": 2956, "uh": 2957, "Ġsixth": 2958, "Ġtalent": 2959, "ĠImage": 2960, "ering": 2961, "run": 2962, "ments": 2963, "Ġconducted": 2964, "300": 2965, "Ġurged": 2966, "Ġdiscovered": 2967, "Ġpl": 2968, "Ġunderstanding": 2969, "Ġoffense": 2970, "Ġsecretary": 2971, "Ġsk": 2972, "Ġloans": 2973, "ĠGr": 2974, "Ġapplications": 2975, "Ġcrude": 2976, "go": 2977, "ĠInstead": 2978, "Ġopinion": 2979, "Ġdoubt": 2980, "ey": 2981, "Ġdis": 2982, "31": 2983, "Ġexperienced": 2984, "Ġleg": 2985, "ĠCleveland": 2986, "ven": 2987, "Ġfailure": 2988, "market": 2989, "ack": 2990, "Ġdecline": 2991, "Ġchanging": 2992, "Ġ300": 2993, "Ġdefence": 2994, "ĠBrian": 2995, "Ġdelivery": 2996, "Ġmarried": 2997, "Ġdeclared": 2998, "Ġpull": 2999, "Ġlimit": 3000, "ĠMORE": 3001, "Ġdefeat": 3002, "Ġexpand": 3003, "ĠColorado": 3004, "ĠRob": 3005, "iss": 3006, "Ġworse": 3007, "Ġperform": 3008, "ising": 3009, "Ġ2007": 3010, "ĠDel": 3011, "Ġsurgery": 3012, "Ġeasier": 3013, "Ġmaintain": 3014, "ĠEx": 3015, "Ġtied": 3016, "Ġeast": 3017, "Ġuser": 3018, "ola": 3019, "Ġprogramme": 3020, "Ġmanufacturing": 3021, "Ġhitting": 3022, "Ġx": 3023, "Ġskin": 3024, "Ġartist": 3025, "Ġtells": 3026, "Ġnearby": 3027, "ĠDaniel": 3028, "ĠPower": 3029, "Ġdetermined": 3030, "Ġactual": 3031, "Ġtreated": 3032, "Ġlived": 3033, "Ġcomputer": 3034, "Ġcool": 3035, "oo": 3036, "ĠPl": 3037, "Ġeffects": 3038, "Ġenvironmental": 3039, "ĠMorgan": 3040, "Ġflow": 3041, "Ġachieve": 3042, "ĠBell": 3043, "Ġtesting": 3044, "ĠBob": 3045, "Ġwhatever": 3046, "ĠBecause": 3047, "US": 3048, "ĠHollywood": 3049, "Ġconflict": 3050, "Ġwalking": 3051, "ĠJudge": 3052, "ĠAlabama": 3053, "Ġaircraft": 3054, "Ġte": 3055, "well": 3056, "Ġgoods": 3057, "Ġidentify": 3058, "Ġassociated": 3059, "ĠVer": 3060, "ĠEducation": 3061, "Ġairport": 3062, "IL": 3063, "Ġfalling": 3064, "Ġgiant": 3065, "ĠMa": 3066, "ĠMedical": 3067, "Ġride": 3068, "Ġden": 3069, "º": 3070, "ĠJose": 3071, "Ġwest": 3072, "ĠPacific": 3073, "Ġvisitors": 3074, "ĠWatch": 3075, "ĠNations": 3076, "Ġgains": 3077, "Ġschedule": 3078, "34": 3079, "ĠExchange": 3080, "Ġpayments": 3081, "ĠII": 3082, "70": 3083, "No": 3084, "ĠSyrian": 3085, "ĠAdam": 3086, "Ġne": 3087, "Ġpartnership": 3088, "Ġbl": 3089, "ĠGeorgia": 3090, "Ġsites": 3091, "Ġmodels": 3092, "Ġdegree": 3093, "Ġdetermine": 3094, "ĠWilson": 3095, "Ġcontest": 3096, "Ġprofessor": 3097, "ĠChelsea": 3098, "Ġmeaning": 3099, "ĠGames": 3100, "ĠTrust": 3101, "ĠAsian": 3102, "33": 3103, "Ġlink": 3104, "ĠUp": 3105, "Ġholds": 3106, "ĠTop": 3107, "ĠItalian": 3108, "ord": 3109, "ĠKansas": 3110, "Ġfarmers": 3111, "Ġextended": 3112, "Ġbirth": 3113, "Ġreform": 3114, "Ġrelations": 3115, "Ġwrite": 3116, "Ġsupporting": 3117, "55": 3118, "ita": 3119, "Ġnotice": 3120, "ster": 3121, "Ġanimals": 3122, "ĠJersey": 3123, "Ġarm": 3124, "ĠForeign": 3125, "ĠLife": 3126, "Ġtruly": 3127, "ĠOnce": 3128, "ĠMayor": 3129, "ĠFree": 3130, "ĠAgency": 3131, "ĠWood": 3132, "Ġpassing": 3133, "DA": 3134, "Ġ52": 3135, "Ġmoves": 3136, "Ġcom": 3137, "house": 3138, "ĠIts": 3139, "Ġmarijuana": 3140, "ines": 3141, "Ġveteran": 3142, "Ġvariety": 3143, "ki": 3144, "ff": 3145, "amb": 3146, "Ġlisted": 3147, "Ġpushed": 3148, "Ġvolume": 3149, "Ġincreasingly": 3150, "Ġkick": 3151, "Ġrock": 3152, "ank": 3153, "Ġfees": 3154, "Ġenable": 3155, "Ġimages": 3156, "Ġtruth": 3157, "Ġministry": 3158, "Ġrare": 3159, "ĠDallas": 3160, "ĠMinnesota": 3161, "Ġcontributed": 3162, "ĠCharles": 3163, "Ġpercentage": 3164, "Ġtechnical": 3165, "ĠApp": 3166, "Ġassistant": 3167, "Ġinterests": 3168, "Ġimmediate": 3169, "38": 3170, "ĠTown": 3171, "Ġclosing": 3172, "ĠAnthony": 3173, "Ġsouthern": 3174, "ase": 3175, "ĠPutin": 3176, "ĠForce": 3177, "ba": 3178, "Ġrefused": 3179, "ĠStill": 3180, "ix": 3181, "ĠCol": 3182, "Ġmaterials": 3183, "Ġstructure": 3184, "Ġdriven": 3185, "Ġpatient": 3186, "Ġbroken": 3187, "Ġradio": 3188, "Ġscale": 3189, "Ġreplace": 3190, "Ġ39": 3191, "ĠLand": 3192, "Ġdeputy": 3193, "und": 3194, "Ġcolor": 3195, "OS": 3196, "Ġroads": 3197, "Ġcorruption": 3198, "ĠRose": 3199, "Ġemployee": 3200, "ĠWater": 3201, "Ġseats": 3202, "Ġwalked": 3203, "ec": 3204, "Ġcents": 3205, "Ġchain": 3206, "Ġpayment": 3207, "ĠAndroid": 3208, "eb": 3209, "Ġcommission": 3210, "Ġthrow": 3211, "Ġcount": 3212, "Ġaccident": 3213, "Ġexpensive": 3214, "ered": 3215, "ĠYes": 3216, "ĠLouis": 3217, "Ġstudies": 3218, "Ġinvestigating": 3219, "Ġcentury": 3220, "Ġdiscussion": 3221, "Ġinter": 3222, "DAQ": 3223, "ĠBefore": 3224, "Ġinitially": 3225, "*": 3226, "Ġinvestments": 3227, "Ġmulti": 3228, "Ġtight": 3229, "Ġconfident": 3230, "Ġcounter": 3231, "ĠQu": 3232, "Ġgovernments": 3233, "Ġarmed": 3234, "Ġsuit": 3235, "Ġrow": 3236, "Ġlocations": 3237, "Ġepisode": 3238, "itch": 3239, "Ġyounger": 3240, "Ġfestival": 3241, "Ġpitch": 3242, "ĠOF": 3243, "Ġtalked": 3244, "ca": 3245, "Ġprotests": 3246, "Ġtargets": 3247, "90": 3248, "Ġoriginally": 3249, "Ġsinger": 3250, "Ġjourney": 3251, "ug": 3252, "Ġapply": 3253, "Ġteacher": 3254, "Ġchances": 3255, "):": 3256, "Ġdeaths": 3257, "isation": 3258, "ĠStephen": 3259, "Ġcode": 3260, "ĠChampionship": 3261, "ĠJason": 3262, "ĠAT": 3263, "Ġaccept": 3264, "ĠSeries": 3265, "Ġvalues": 3266, "Ġbed": 3267, "ĠHarry": 3268, "Ġflat": 3269, "Ġtools": 3270, "Ġpublicly": 3271, "37": 3272, "Ġpointed": 3273, "ĠGolden": 3274, "ps": 3275, "Ġunable": 3276, "ants": 3277, "Ġestimate": 3278, "Ġwarm": 3279, "Ġbasic": 3280, "ern": 3281, "Ġraising": 3282, "ĠRelated": 3283, "Ġultimately": 3284, "Ġnorthern": 3285, "Ġplane": 3286, "ĠVice": 3287, "ĠRaj": 3288, "ĠJustin": 3289, "anc": 3290, "Ġbrings": 3291, "ĠArt": 3292, "OT": 3293, "Ġshift": 3294, "ĠBBC": 3295, "ĠSu": 3296, "BS": 3297, "Ġbag": 3298, "Ġdoctor": 3299, "Ġfill": 3300, "Ġdowntown": 3301, "Ġpossibility": 3302, "ĠAg": 3303, "Ġest": 3304, "44": 3305, "Ġstruggling": 3306, "Ġlinked": 3307, "Ġtickets": 3308, "ĠJay": 3309, "ĠCall": 3310, "Ġstands": 3311, "Ġwedding": 3312, "Ġresident": 3313, "eng": 3314, "Ġleads": 3315, "Ġadvance": 3316, "ĠAtlanta": 3317, "Ġtie": 3318, "Ġadvanced": 3319, "pt": 3320, "burg": 3321, "ĠEarlier": 3322, "ĠSw": 3323, "ĠZealand": 3324, "Ġexercise": 3325, "ĠAM": 3326, "Ġaffect": 3327, "Ġpossession": 3328, "Ġinvolving": 3329, "Ġ42": 3330, "Ġwriter": 3331, "ĠBeijing": 3332, "Ġdoctors": 3333, "Ġobviously": 3334, "Ġer": 3335, "ĠOlympic": 3336, "Ġ75": 3337, "ĠKhan": 3338, "ĠFort": 3339, "app": 3340, "like": 3341, "Ġsea": 3342, "ock": 3343, "Ġmix": 3344, "ĠIraq": 3345, "ĠMuslim": 3346, "ĠFinally": 3347, "Ġcontinuing": 3348, "Ġpr": 3349, "ĠKe": 3350, "ĠJoseph": 3351, "Ġexpects": 3352, "Ġinstitutions": 3353, "Ġconservative": 3354, "own": 3355, "ĠChairman": 3356, "Ġreturning": 3357, ".-": 3358, "Ġstood": 3359, "Ġvision": 3360, "ess": 3361, "Ġadults": 3362, "Ġyield": 3363, "Ġprove": 3364, "Ġorders": 3365, "Ġdream": 3366, "36": 3367, "related": 3368, "Ġsl": 3369, "Ġeverybody": 3370, "ui": 3371, "Ġrepresents": 3372, "Ġdiscussed": 3373, "Ġbecomes": 3374, "Ġvillage": 3375, "CC": 3376, "Ġnegotiations": 3377, "ĠPhiladelphia": 3378, "Ġcelebrate": 3379, "Ġfarm": 3380, "Ã§": 3381, "Ġregistered": 3382, "ĠGovernor": 3383, "OL": 3384, "ĠMon": 3385, "Ġfiling": 3386, "04": 3387, "SE": 3388, "ĠAssembly": 3389, "Ġactress": 3390, "Ġsi": 3391, "Ġthank": 3392, "Ġheading": 3393, "ĠWho": 3394, "Ġfamous": 3395, "Ġconsecutive": 3396, "Ġmarriage": 3397, "ette": 3398, "NAS": 3399, "acks": 3400, "ĠPlease": 3401, "ĠDiego": 3402, "Ġbaseball": 3403, "ĠMoore": 3404, "Ġties": 3405, "Ġcarrying": 3406, "que": 3407, "Ġturning": 3408, "ĠMcC": 3409, "ĠKen": 3410, "OR": 3411, "ĠStock": 3412, "Ġbuildings": 3413, "49": 3414, "ĠVan": 3415, "39": 3416, "ĠSeattle": 3417, "Ġwild": 3418, "Ġcrew": 3419, "Ġroute": 3420, "ĠTime": 3421, "Ġtonight": 3422, "Ġmoments": 3423, "Ġvideos": 3424, "Ġinternal": 3425, "ĠLiverpool": 3426, "port": 3427, "Ġchair": 3428, "Ġrival": 3429, "ĠScotland": 3430, "round": 3431, "ith": 3432, "Ġbreaking": 3433, "Ġvoting": 3434, "ically": 3435, "Ġproducer": 3436, "ĠLove": 3437, "Ġremove": 3438, "PA": 3439, "Ġasset": 3440, "Ġrequires": 3441, "Ġsigning": 3442, "ages": 3443, "Ġimpressive": 3444, "ĠIrish": 3445, "Ġauthority": 3446, "Ġruled": 3447, "Ġaimed": 3448, "Ġcaptain": 3449, "AG": 3450, "Ġplants": 3451, "ĠAnderson": 3452, "ĠSpanish": 3453, "Ġbanking": 3454, "Ġthreats": 3455, "Ġsuspended": 3456, "Ġtests": 3457, "Ġreligious": 3458, "Ġelectric": 3459, "ĠREAD": 3460, "Ġstrategic": 3461, "Ġsplit": 3462, "ex": 3463, "Ġpractices": 3464, "ĠIsraeli": 3465, "ĠArabia": 3466, "ĠMoscow": 3467, "Ġfranchise": 3468, "Ġcustody": 3469, "ĠOld": 3470, "Ġrequirements": 3471, "Ġquarterly": 3472, "Ġcomfortable": 3473, "Ġcrimes": 3474, "Ġheaded": 3475, "Ġnewsletter": 3476, "Ġanimal": 3477, "Ġregulations": 3478, "long": 3479, "ĠCNN": 3480, "Ġassists": 3481, "Ġshopping": 3482, "ĠGov": 3483, "ĠSecurities": 3484, "Ġassistance": 3485, "Ġnor": 3486, "Ġrelatively": 3487, "Ġincreases": 3488, "Ġgenerally": 3489, "Ġ55": 3490, "Ġgained": 3491, "Ġ41": 3492, "Ġpictures": 3493, "gan": 3494, "Ġpop": 3495, "Ġupdates": 3496, "ĠRepublic": 3497, "Ġrebounds": 3498, "ĠPatrick": 3499, "Ġrelief": 3500, "Ġacting": 3501, "ĠFestival": 3502, "Ġ2006": 3503, "Ġboss": 3504, "Ġtypes": 3505, "65": 3506, "ĠYet": 3507, "Ġpurpose": 3508, "ning": 3509, "Ġmatters": 3510, "Ġcompete": 3511, "ball": 3512, "ĠRam": 3513, "Ġsw": 3514, "ĠFollowing": 3515, "ĠBush": 3516, "Ġtroops": 3517, "Ġsupposed": 3518, "Ġfreedom": 3519, "Ġfeatured": 3520, "Ġstorage": 3521, "ĠInformation": 3522, "ĠHong": 3523, "Ġgolf": 3524, "Ġagents": 3525, "Ġfraud": 3526, "Ġminimum": 3527, "Ġartists": 3528, "Ġeat": 3529, "high": 3530, "ĠFormer": 3531, "ĠKong": 3532, "ĠJosh": 3533, "ĠDelhi": 3534, "Ġshowers": 3535, "ĠAcademy": 3536, "Ġapartment": 3537, "Ġvan": 3538, "Ġfish": 3539, "oe": 3540, "Ġfilms": 3541, "ĠBo": 3542, "Ġedge": 3543, "Ġpossibly": 3544, "Ġtweet": 3545, "09": 3546, "Ġresolution": 3547, "jo": 3548, "Ġkill": 3549, "Ġ44": 3550, "Ġcell": 3551, "Ġscheme": 3552, "Ġth": 3553, "Ġbonds": 3554, "Ġentry": 3555, "Ġsecret": 3556, "Ġ43": 3557, "Ġending": 3558, "Ġweren": 3559, "ĠCredit": 3560, "ĠLive": 3561, "Ġretired": 3562, "Ġmachine": 3563, "Ġsummit": 3564, "Ġsharing": 3565, "Ġacquired": 3566, "Ġera": 3567, "Ġwear": 3568, "ical": 3569, "07": 3570, "Ġexciting": 3571, "li": 3572, "BC": 3573, "ĠSocial": 3574, "Ġhistoric": 3575, "ĠChe": 3576, "ĠLewis": 3577, "ira": 3578, "Ġstolen": 3579, "ĠSpeaking": 3580, "Ġsleep": 3581, "Ġspokeswoman": 3582, "week": 3583, "Ġpurchased": 3584, "Ġimportance": 3585, "EC": 3586, "Ġends": 3587, "Ġdress": 3588, "Ġparliament": 3589, "ĠCruz": 3590, "Ġcards": 3591, "hi": 3592, "ĠEmail": 3593, "Ġrepresent": 3594, "Ġbrands": 3595, "ĠSenior": 3596, "Ġparticipants": 3597, "Ġfly": 3598, "Ġidentity": 3599, "ĠHam": 3600, "ĠSky": 3601, "ĳ": 3602, "SA": 3603, "Ġpromised": 3604, "Ġtrouble": 3605, "Ġsuffering": 3606, "Ġleaves": 3607, "Ġsuggest": 3608, "Sh": 3609, "Ġbusy": 3610, "Ġproperties": 3611, "Ġworldwide": 3612, "Ġcloud": 3613, "ĠSEC": 3614, "Ġclosely": 3615, "Ġmanage": 3616, "Ġnumerous": 3617, "Ġbackground": 3618, "ĠExpress": 3619, "Ġ65": 3620, "ĠTony": 3621, "ĠMadrid": 3622, "ev": 3623, "der": 3624, "Ġsignificantly": 3625, "Ġalternative": 3626, "Ġship": 3627, "head": 3628, "ators": 3629, "Ġdinner": 3630, "ax": 3631, "SC": 3632, "Ġcriticism": 3633, "ĠMah": 3634, "ĠMin": 3635, "rie": 3636, "ĠTour": 3637, "Ġbench": 3638, "Ġadds": 3639, "Ġseriously": 3640, "star": 3641, "ĠJournal": 3642, "ĠDi": 3643, "ali": 3644, "Ġsentence": 3645, "ĠSeveral": 3646, "Ġmayor": 3647, "ati": 3648, "Ġsuggests": 3649, "Ġbehavior": 3650, "Ġstronger": 3651, "ĠFood": 3652, "Ġclient": 3653, "not": 3654, "ĠPrice": 3655, "Ġtargeted": 3656, "ĠSingh": 3657, "ĠNetwork": 3658, "Ġprosecutors": 3659, "Ġdirected": 3660, "ĠDemocrat": 3661, "bl": 3662, "ues": 3663, "ĠFamily": 3664, "Ġconnected": 3665, "ĠChampions": 3666, "Ġroughly": 3667, "Ġabsolutely": 3668, "08": 3669, "Ġpassengers": 3670, "Ã¶": 3671, "ĠSpecial": 3672, "Ġcoast": 3673, "Ġcomplaint": 3674, "Ġ400": 3675, "ĠEm": 3676, "ves": 3677, "Ġdogs": 3678, "Ġhandle": 3679, "Ġotherwise": 3680, "Ġsees": 3681, "Ġticket": 3682, "ĠAward": 3683, "All": 3684, "Ġtask": 3685, "Ġsongs": 3686, "ĠAmong": 3687, "Ġdedicated": 3688, "Ġsteel": 3689, "looking": 3690, "Ġshortly": 3691, "Ġtackle": 3692, "ative": 3693, "Ġminor": 3694, "Ã¢": 3695, "Ġprovider": 3696, "vers": 3697, "use": 3698, "ives": 3699, "Ġtypically": 3700, "Ġarms": 3701, "ĠAnt": 3702, "ĠIS": 3703, "Ġjump": 3704, "ĠÂ©": 3705, "47": 3706, "aff": 3707, "Ġmonthly": 3708, "ĠMicrosoft": 3709, "ĠCBS": 3710, "Ġthreatened": 3711, "Ġhonor": 3712, "ĠMo": 3713, "42": 3714, "Ġinning": 3715, "Ġpool": 3716, "Ġhealthcare": 3717, "ĠStory": 3718, "ĠTennessee": 3719, "Ġpromote": 3720, "EL": 3721, "Ġemotional": 3722, "Ġpe": 3723, "Ġfactor": 3724, "Ġinvestigators": 3725, "Ľ": 3726, "ĠBack": 3727, "ĠProject": 3728, "Ġcu": 3729, "side": 3730, "Ġmessages": 3731, "TH": 3732, "eg": 3733, "Ġexperiences": 3734, "Ġcausing": 3735, "Ġjoining": 3736, "Ġpackage": 3737, "Ġbodies": 3738, "Ġlots": 3739, "ĠHarris": 3740, "Ġcl": 3741, "ĠInternet": 3742, "free": 3743, "Ġperformed": 3744, "Ġpieces": 3745, "buy": 3746, "Ġcaption": 3747, "Ġweb": 3748, "Ġcontracts": 3749, "At": 3750, "Ġattempted": 3751, "Ġunlikely": 3752, "Ġclick": 3753, "Ġinvest": 3754, "IM": 3755, "ĠView": 3756, "Ġneighborhood": 3757, "Ġring": 3758, "ĠFour": 3759, "ail": 3760, "46": 3761, "One": 3762, "Ġnative": 3763, "CH": 3764, "OM": 3765, "Ġalcohol": 3766, "ĠVal": 3767, "Ġcharacters": 3768, "ĠPat": 3769, "Ġpoliticians": 3770, "ĠMag": 3771, "Ġbegins": 3772, "ĠAk": 3773, "Ġlos": 3774, "Ġpersonnel": 3775, "Ġenjoyed": 3776, "ĠTechnology": 3777, "Ġsun": 3778, "ĠIT": 3779, "Ġdocument": 3780, "Ġdeficit": 3781, "Ġcoalition": 3782, "Ġmemory": 3783, "Ġpushing": 3784, "any": 3785, "ified": 3786, "Ġfounder": 3787, "Ġ2000": 3788, "2017": 3789, "Ġvisited": 3790, "ĠThough": 3791, "ph": 3792, "Ġsoft": 3793, "Ġflag": 3794, "Ġmom": 3795, "inch": 3796, "ĠSamsung": 3797, "Ġapps": 3798, "Ġtouchdown": 3799, "ĠCare": 3800, "ĠMrs": 3801, "Ġredistributed": 3802, "Ġencourage": 3803, "ched": 3804, "Ġtend": 3805, "Ġregions": 3806, "pp": 3807, "IP": 3808, "br": 3809, "ush": 3810, "Ġargued": 3811, "Ġjunior": 3812, "BA": 3813, "Ġsevere": 3814, "ĠNIGHT": 3815, "Ġdef": 3816, "Ġsurrounding": 3817, "48": 3818, "Ġengine": 3819, "Ġfilled": 3820, "Ġseventh": 3821, "Ġbattery": 3822, "ĠAllen": 3823, "Ġguidance": 3824, "Ġroll": 3825, "Ġrural": 3826, "Ġexpert": 3827, "Ġconvicted": 3828, "Ġlikes": 3829, "ĠRo": 3830, "Ġgrown": 3831, "Ġretirement": 3832, "Ġintended": 3833, "Ġmis": 3834, "Ġarmy": 3835, "Ġdance": 3836, "ĠThank": 3837, "Ġent": 3838, "Ġoutlook": 3839, "Ġpara": 3840, "Ġdry": 3841, "ĠTO": 3842, "era": 3843, "Ġwaste": 3844, "Ġfaster": 3845, "ĠEagles": 3846, "TA": 3847, "ĠFrank": 3848, "Ã": 3849, "LE": 3850, "ura": 3851, "ko": 3852, "ao": 3853, "Ġdistribution": 3854, "Ġimprovement": 3855, "Ġplayoff": 3856, "Ġacquisition": 3857, "ĠCH": 3858, "Ġtomorrow": 3859, "Ġstruggle": 3860, "ĠHuman": 3861, "Ġnewly": 3862, "oon": 3863, "ĠNe": 3864, "con": 3865, "sc": 3866, "Ġunless": 3867, "Ġtransition": 3868, "ten": 3869, "ĠInter": 3870, "Ġequal": 3871, "Ġrec": 3872, "Ġappointed": 3873, "Ġwake": 3874, "ĠEarth": 3875, "ose": 3876, "ĠEastern": 3877, "Ġsoldiers": 3878, "ĠParliament": 3879, "Ġsets": 3880, "Ġattempts": 3881, "ĠIllinois": 3882, "Ġrevenues": 3883, "ĠWil": 3884, "Ġheads": 3885, "Ġprepare": 3886, "Ġpriority": 3887, "PS": 3888, "ĠJo": 3889, "ĠNBC": 3890, "Ġtherefore": 3891, "yn": 3892, "Ġinitiative": 3893, "ct": 3894, "Ġcoffee": 3895, "ĠFair": 3896, "43": 3897, "den": 3898, "form": 3899, "ova": 3900, "Ġappropriate": 3901, "ĠPlay": 3902, "Ġaccepted": 3903, "Ġcreative": 3904, "Ġfollows": 3905, "Ġrescue": 3906, "Ġtree": 3907, "With": 3908, "ĠNetflix": 3909, "ĠFootball": 3910, "Ġsurprised": 3911, "Ġlowest": 3912, "800": 3913, "amp": 3914, "Ġworried": 3915, "mar": 3916, "ran": 3917, "Ġvisiting": 3918, "Ġselected": 3919, "ĠMusic": 3920, "ĠAnn": 3921, "Ġexplain": 3922, "ging": 3923, "Ġwidely": 3924, "Ġsquare": 3925, "Ġtrends": 3926, "Ġimproving": 3927, "ĠHead": 3928, "ĠQueen": 3929, "ĠSociety": 3930, "Ġcutting": 3931, "ĠGOP": 3932, "03": 3933, "',": 3934, "ET": 3935, "ĠDrive": 3936, "oll": 3937, "ato": 3938, "ĠSea": 3939, "Ġjury": 3940, "ĠRights": 3941, "Ġinvestor": 3942, "ĠABC": 3943, "Ġtool": 3944, "ĠAre": 3945, "Ġrejected": 3946, "Ġemerging": 3947, "Ġcounts": 3948, "Ġnations": 3949, "Ġfalse": 3950, "Ġtreat": 3951, "va": 3952, "Ġweak": 3953, "ĠHighway": 3954, "down": 3955, "Ġstruggled": 3956, "ĠMP": 3957, "Ġguests": 3958, "Ġgender": 3959, "Ġhouses": 3960, "rit": 3961, "ĠWild": 3962, "Ġstreak": 3963, "uc": 3964, "ĠReserve": 3965, "ĠRatings": 3966, "alt": 3967, "Ġgreatest": 3968, "Ġlawyers": 3969, "Ġreaching": 3970, "Ġtemperatures": 3971, "To": 3972, "Ġoutstanding": 3973, "Ġpasses": 3974, "Ġfaith": 3975, "inc": 3976, "Ġcr": 3977, "Ġinformed": 3978, "oz": 3979, "Ġtrees": 3980, "Ġsending": 3981, "Ġ150": 3982, "bo": 3983, "Ġwine": 3984, "ros": 3985, "Ġsuspected": 3986, "Ġrepeatedly": 3987, "Ġhat": 3988, "Ġshape": 3989, "ĠWh": 3990, "Ġassist": 3991, "Ġstress": 3992, "Ġfeed": 3993, "ark": 3994, "ored": 3995, "Ġwatched": 3996, "Ġincredible": 3997, "cl": 3998, "nt": 3999, "Ġentertainment": 4000, "ih": 4001, "Ġbeauty": 4002, "Ġbi": 4003, "ĠLocal": 4004, "Ġsat": 4005, "41": 4006, "Ġbroad": 4007, "Ġheavily": 4008, "Ġengaged": 4009, "Ġspecifically": 4010, "ĠMen": 4011, "ĠRoss": 4012, "Ġ2005": 4013, "ST": 4014, "95": 4015, "Ġdownload": 4016, "400": 4017, "Ġsentenced": 4018, "ĠCatholic": 4019, "ĠOklahoma": 4020, "Ġthrew": 4021, "Ġworry": 4022, "Ġimp": 4023, "Ġdrove": 4024, "Ġcolleagues": 4025, "Ġagenda": 4026, "64": 4027, "ĠEach": 4028, "Ġfee": 4029, "New": 4030, "ium": 4031, "Ġspokesperson": 4032, "Ġbills": 4033, "Ġ47": 4034, "ĠAfghanistan": 4035, "Ġinvited": 4036, "ĠYouTube": 4037, "Ġanniversary": 4038, "Ġdozen": 4039, "ram": 4040, "ĠOnly": 4041, "Ġemployment": 4042, "Getty": 4043, "Ġgap": 4044, "Ġsweet": 4045, "ĠLittle": 4046, "Ġinf": 4047, "ying": 4048, "Ġglass": 4049, "Ġclasses": 4050, "Ġcoal": 4051, "ĠSub": 4052, "Ġduty": 4053, "CA": 4054, "Ġcoaches": 4055, "Â": 4056, "anna": 4057, "ĠSk": 4058, "Ġ46": 4059, "ison": 4060, "ille": 4061, "ĠST": 4062, "ric": 4063, "Ġparticipate": 4064, "Ġequ": 4065, "Ġrich": 4066, "Ġrespectively": 4067, "Ġexpenses": 4068, "Ġcombination": 4069, "right": 4070, "Ġshareholders": 4071, "Ġturns": 4072, "Ġearn": 4073, "Ġ51": 4074, "ured": 4075, "Ġdrink": 4076, "ĠKar": 4077, "ĠShares": 4078, "ĠMid": 4079, "ĠGetty": 4080, "Ġbridge": 4081, "lo": 4082, "Ġinspired": 4083, "Ġsurface": 4084, "Ġgift": 4085, "ence": 4086, "Ġchallenging": 4087, "Ġoffices": 4088, "Ġsuspects": 4089, "ĠFinance": 4090, "Ġab": 4091, "bound": 4092, "Ġmomentum": 4093, "Ġbacked": 4094, "Ġparent": 4095, "Ġcrucial": 4096, "ave": 4097, "Ġdealing": 4098, "Ġregulatory": 4099, "Ġapparently": 4100, "ĠMat": 4101, "Ġapart": 4102, "Ġport": 4103, "ole": 4104, "Ġbeach": 4105, "Ġcultural": 4106, "Ġinstitutional": 4107, "Ġbeating": 4108, "ĠIowa": 4109, "ĠAli": 4110, "67": 4111, "Ġje": 4112, "ays": 4113, "Ġweekly": 4114, "Ġbirthday": 4115, "Ġpipeline": 4116, "Ġknee": 4117, "Ġsolar": 4118, "ĠPe": 4119, "Ġcategory": 4120, "ĠArea": 4121, "ky": 4122, "ures": 4123, "06": 4124, "ĠBall": 4125, "Ġsemi": 4126, "ĠHamilton": 4127, "hip": 4128, "ĠPh": 4129, "ĠNext": 4130, "Ġathletes": 4131, "ii": 4132, "Ġmovies": 4133, "han": 4134, "net": 4135, "Ġplastic": 4136, "Ġbehalf": 4137, "gen": 4138, "Ġfindings": 4139, "Ġstretch": 4140, "ĠSa": 4141, "Ġofficially": 4142, "ĠSarah": 4143, "Ġprivacy": 4144, "ĠMad": 4145, "Ġnone": 4146, "gh": 4147, "On": 4148, "Ġdrama": 4149, "ĠFl": 4150, "ika": 4151, "ĠArsenal": 4152, "Ġviolent": 4153, "UN": 4154, "called": 4155, "59": 4156, "Ġhate": 4157, "Ġrelationships": 4158, "Ġgranted": 4159, "ĠJon": 4160, "Ġlisten": 4161, "season": 4162, "Ġfewer": 4163, "GA": 4164, "ĠLabour": 4165, "Ġremarks": 4166, "ĠJonathan": 4167, "ĠRos": 4168, "sey": 4169, "ĠOntario": 4170, "ĠThompson": 4171, "ĠNight": 4172, "Ġranked": 4173, "ĠUkraine": 4174, "Ġimmigrants": 4175, "Ġdegrees": 4176, "ĠGe": 4177, "Ġlabor": 4178, "umb": 4179, "ĠYORK": 4180, "Ġallies": 4181, "sp": 4182, "hed": 4183, "sw": 4184, "Ġtariffs": 4185, "SP": 4186, "Ġclassic": 4187, "Ġawards": 4188, "ents": 4189, "Ġfix": 4190, "Ġsoccer": 4191, "Ġconcert": 4192, "ust": 4193, "Ġadult": 4194, "Ġoutput": 4195, "Ġmanaging": 4196, "02": 4197, "Ġpromise": 4198, "Ġawareness": 4199, "Ġgross": 4200, "Ġentering": 4201, "Ġpo": 4202, "oj": 4203, "Ġmetal": 4204, "Ġexit": 4205, "Ġexcellent": 4206, "Ġclubs": 4207, "hold": 4208, "Ġreplaced": 4209, "ĠClass": 4210, "Ġscientists": 4211, "Ġprimarily": 4212, "ĠMer": 4213, "Ã£o": 4214, "Ġcircumstances": 4215, "ades": 4216, "Ġsupplies": 4217, "aker": 4218, "ĠSand": 4219, "Ġscandal": 4220, "Ġsettlement": 4221, "ĠWisconsin": 4222, "ĠWarriors": 4223, "ĠAustin": 4224, "Ġjournalists": 4225, "ening": 4226, "Ġreflect": 4227, "ĠBuy": 4228, "ĠAwards": 4229, "Ġselection": 4230, "ĠBel": 4231, "bury": 4232, "Ġtechnologies": 4233, "%,": 4234, "ime": 4235, "ĠÄ": 4236, "ĠAdministration": 4237, "Ġchannel": 4238, "Star": 4239, "Ġtransport": 4240, "Ġawarded": 4241, "ena": 4242, "Ġmotor": 4243, "orn": 4244, "kin": 4245, "Ġfeaturing": 4246, "Ġphones": 4247, "ĠAND": 4248, "Ġrelevant": 4249, "ĠSee": 4250, "Ġwinners": 4251, "Ġdad": 4252, "ĠSource": 4253, "ĠCheck": 4254, "aut": 4255, "ĠFar": 4256, "Ġopponents": 4257, "Ġoutcome": 4258, "Ġdoors": 4259, "Ġsuicide": 4260, "ima": 4261, "Ġjumped": 4262, "Ġperspective": 4263, "Ġtransportation": 4264, "Ġthinks": 4265, "ĠMor": 4266, "Ġdeadline": 4267, "Ġ53": 4268, "ĠDeputy": 4269, "ery": 4270, "Ġdetailed": 4271, "uch": 4272, "ĠBur": 4273, "Ġtrades": 4274, "ĠGreg": 4275, "Ġzero": 4276, "erson": 4277, "ĠChildren": 4278, "Ġdu": 4279, "66": 4280, "Ġmixed": 4281, "ĠBarack": 4282, "54": 4283, "Ġterritory": 4284, "Ġac": 4285, "Ġconcept": 4286, "ĠAdd": 4287, "Ġourselves": 4288, "Ġreaction": 4289, "ĠSydney": 4290, "ink": 4291, "Ġconsistent": 4292, "Ġboat": 4293, "room": 4294, "Ġdozens": 4295, "Ġeffectively": 4296, "but": 4297, "Ġmotion": 4298, "Ġalive": 4299, "ĠKey": 4300, "weight": 4301, "Ġexports": 4302, "Ġoperate": 4303, "Ġregime": 4304, "ĠAuthority": 4305, "och": 4306, "ĠCR": 4307, "leg": 4308, "Ġforget": 4309, "American": 4310, "bs": 4311, "Ġthoughts": 4312, "ĠSign": 4313, "ĠPatriots": 4314, "Ġbrief": 4315, "ĠOregon": 4316, "ĠBal": 4317, "Ġmine": 4318, "Ġciting": 4319, "Ġmagazine": 4320, "more": 4321, "ERS": 4322, "ĠBer": 4323, "ua": 4324, "ox": 4325, "ĠMain": 4326, "Ġinstance": 4327, "tr": 4328, "Ġrestaurants": 4329, "ora": 4330, "Ġharassment": 4331, "\",\"": 4332, "Ł": 4333, "Ġsilver": 4334, "ĠMueller": 4335, "ĠSenator": 4336, "ĠEvery": 4337, "Ġfootage": 4338, "ms": 4339, "Ġopposed": 4340, "ĠLink": 4341, "Ġver": 4342, "Ġpleased": 4343, "ame": 4344, "ending": 4345, "Ġrivals": 4346, "ida": 4347, "ike": 4348, "ta": 4349, "ĠCook": 4350, "Ġheadquarters": 4351, "ear": 4352, "Ġaggressive": 4353, "Ġcourts": 4354, "ĠMuseum": 4355, "Ġim": 4356, "ĠHoldings": 4357, "Ġcommunication": 4358, "Ġphase": 4359, "yl": 4360, "Ġpowers": 4361, "Ġproved": 4362, "Ġcarbon": 4363, "Ġaside": 4364, "ĠOlympics": 4365, "Ġgathered": 4366, "ĠPennsylvania": 4367, "Ġsmartphone": 4368, "ĠMet": 4369, "ĠHurricane": 4370, "Ġprotected": 4371, "Ġcommunications": 4372, "Ġemerged": 4373, "Ġaim": 4374, "Ġstable": 4375, "ides": 4376, "GB": 4377, "Ġentirely": 4378, "Ġmissile": 4379, "ĠGen": 4380, "Ġunclear": 4381, "Ġelectricity": 4382, "ology": 4383, "away": 4384, "Ġlicense": 4385, "ĠPittsburgh": 4386, "Ġcameras": 4387, "Ġmusical": 4388, "Ġmanagers": 4389, "57": 4390, "Ġscores": 4391, "Ġprofile": 4392, "hel": 4393, "¼": 4394, "Ġshouldn": 4395, "RA": 4396, ");": 4397, "Ġpermanent": 4398, "ome": 4399, "Ġet": 4400, "Ġmar": 4401, "Ġfavor": 4402, "Ġmaker": 4403, "Ġdiscussions": 4404, "ory": 4405, "Ġsharp": 4406, "Ġpleaded": 4407, "Ġpassenger": 4408, "quarter": 4409, "Ġdem": 4410, "Ġversus": 4411, "Ġmainly": 4412, "Ġeighth": 4413, "ĠAirport": 4414, "ĠCross": 4415, "million": 4416, "ĠNas": 4417, "Ġcited": 4418, "56": 4419, "Ġyes": 4420, "ĠBelow": 4421, "arn": 4422, "ĠTurkish": 4423, "ĠSl": 4424, "Ġstepped": 4425, "Ġproducers": 4426, "Ġovernight": 4427, "Ġsounds": 4428, "52": 4429, "Ġ64": 4430, "Ġ54": 4431, "58": 4432, "ĠClark": 4433, "ĠRick": 4434, "Ġgr": 4435, "ĠMont": 4436, "Ġbeer": 4437, "une": 4438, "Ġreporter": 4439, "Ġcharity": 4440, "Ġeating": 4441, "Ġextend": 4442, "Ġguess": 4443, "NA": 4444, "Ġhedge": 4445, "Ġencouraged": 4446, "owned": 4447, "ĠMel": 4448, "ĠKentucky": 4449, "ace": 4450, "Ġlineup": 4451, "Ġhosts": 4452, "Ġcapable": 4453, "PR": 4454, "ĠArts": 4455, "Ġcontroversial": 4456, "Ġhosted": 4457, "ries": 4458, "Ġroster": 4459, "Ġfixed": 4460, "ĠWalker": 4461, "ged": 4462, "Ġdisaster": 4463, "Ġdispute": 4464, "ĠDenver": 4465, "ĠTrade": 4466, "ute": 4467, "ese": 4468, "cy": 4469, "Ġgrant": 4470, "ĠMax": 4471, "Ġdistance": 4472, "isc": 4473, "Ġeditor": 4474, "ĠDave": 4475, "Ġperformances": 4476, "Ġlay": 4477, "Ġvulnerable": 4478, "ĠMurray": 4479, "ĠâĤ¬": 4480, "Ġmining": 4481, "Ġ2004": 4482, "level": 4483, "ability": 4484, "Ġauto": 4485, "Ġfake": 4486, "Ġattacked": 4487, "ona": 4488, "ups": 4489, "ened": 4490, "Ġfallen": 4491, "Ġstations": 4492, "ĠContact": 4493, "itz": 4494, "Ġincidents": 4495, "Ġcomplaints": 4496, "Ġoperates": 4497, "Ġrefugees": 4498, "Ġessential": 4499, "ĠTest": 4500, "Ġdemands": 4501, "Ġroles": 4502, "yr": 4503, "Ġacts": 4504, "Ġusual": 4505, "ring": 4506, "Ġhanded": 4507, "ĠMatthew": 4508, "hour": 4509, "Ġindustries": 4510, "Ġshoot": 4511, "ĠAuthorities": 4512, "Ġprobe": 4513, "ĠUtah": 4514, "ĠRBI": 4515, "ĠAD": 4516, "Ġprospect": 4517, "outs": 4518, "ĠUber": 4519, "Ġbright": 4520, "Ġmention": 4521, "Ġsavings": 4522, "ĠMiss": 4523, "ONDON": 4524, "Ġ1990": 4525, "arm": 4526, "ĠTen": 4527, "These": 4528, "Ġexplains": 4529, "minute": 4530, "85": 4531, "Ġmaximum": 4532, "Ġro": 4533, "Ġrookie": 4534, "Ġstudio": 4535, "ĠCam": 4536, "ĠGal": 4537, "Ġdefend": 4538, "hand": 4539, "53": 4540, "ĠOil": 4541, "Ġserves": 4542, "Ġsn": 4543, "ios": 4544, "ĠDefense": 4545, "AB": 4546, "Ġhired": 4547, "Ġsupports": 4548, "Ġpremium": 4549, "ef": 4550, "Ġfailing": 4551, "ĠIndiana": 4552, "Ġexp": 4553, "Ġobjective": 4554, "Ġaffordable": 4555, "ĠCom": 4556, "ĠThanks": 4557, "Ġanywhere": 4558, "Ġconfirm": 4559, "ited": 4560, "Ġrepresenting": 4561, "Ġwitness": 4562, "69": 4563, "Ġclaiming": 4564, "Ġviolation": 4565, "Ġhistorical": 4566, "med": 4567, "Ġpreparing": 4568, "ĠTech": 4569, "Ġposts": 4570, "OC": 4571, "ĠGraham": 4572, "ĠGl": 4573, "ĠLions": 4574, "ales": 4575, "ĠID": 4576, "Ġcorrect": 4577, "ĠAntonio": 4578, "Ġadvertising": 4579, "Ġeastern": 4580, "OW": 4581, "Ġholdings": 4582, "Ġpolls": 4583, "ĠSH": 4584, "Ġexecutives": 4585, "ĠJewish": 4586, "ĠGary": 4587, "Ġprize": 4588, "ĠCommissioner": 4589, "Ġcells": 4590, "ify": 4591, "Ġlunch": 4592, "Ġdemocracy": 4593, "ĠEr": 4594, "Ġregularly": 4595, "Ġresulted": 4596, "ĠAve": 4597, "ĠPartners": 4598, "Ġrewritten": 4599, "Ġlo": 4600, "Ġcooperation": 4601, "ĠGulf": 4602, "Ġsmoke": 4603, "ĠMemorial": 4604, "Ġwave": 4605, "Ġfears": 4606, "Ġkid": 4607, "ĠGiants": 4608, "Ġrecovered": 4609, "row": 4610, "ĠRadio": 4611, "ĠBarcelona": 4612, "Ġwonderful": 4613, "ĠDow": 4614, "Ġstream": 4615, "ĠSimon": 4616, "Ġdetail": 4617, "Ġvolunteers": 4618, "ĠInd": 4619, "Ġforms": 4620, "mann": 4621, "ĠRay": 4622, "oor": 4623, "ĠTake": 4624, "Ġrepresented": 4625, "het": 4626, "Ġblow": 4627, "aged": 4628, "RE": 4629, "ĠMissouri": 4630, "Ġcovering": 4631, "Ġprofits": 4632, "Ġconcluded": 4633, "Ġthus": 4634, "ĠColumbia": 4635, "ode": 4636, "ĠZimbabwe": 4637, "Ġdisclosed": 4638, "Ġlifted": 4639, "ĠSean": 4640, "ĠHarvey": 4641, "ĠPlus": 4642, "ces": 4643, "ĠGreece": 4644, "ĠLady": 4645, "Ġdelay": 4646, "Ġkitchen": 4647, "ĠIndex": 4648, "Ġbear": 4649, "Ġputs": 4650, "new": 4651, "88": 4652, "ĠAsh": 4653, "Å¡": 4654, "Ġperforming": 4655, "law": 4656, "ĠPart": 4657, "Ġindicated": 4658, "Ġannounce": 4659, "Ġcompensation": 4660, "Ġka": 4661, "ĠScience": 4662, "ris": 4663, "Ġrecommendations": 4664, "ĠSecond": 4665, "Ġlights": 4666, "Ġtemporary": 4667, "urs": 4668, "Ġwestern": 4669, "stone": 4670, "68": 4671, "ĠDisney": 4672, "Ġplayoffs": 4673, "Ġjudges": 4674, "Ġengineering": 4675, "ĠPen": 4676, "ĠPal": 4677, "Ġobvious": 4678, "ĠBridge": 4679, "ĠEnd": 4680, "ĠArab": 4681, "Ġexcept": 4682, "Ġhole": 4683, "class": 4684, "Ġcauses": 4685, "Ġconnect": 4686, "ĠAI": 4687, "An": 4688, "Ġchose": 4689, "ĠElizabeth": 4690, "min": 4691, "Ġproper": 4692, "ĠNHL": 4693, "Ġraces": 4694, "Ġinnovation": 4695, "Ġsugar": 4696, "600": 4697, "ĠModi": 4698, "illa": 4699, "Ġtrillion": 4700, "ĠSar": 4701, "ĠAffairs": 4702, "Ġimpossible": 4703, "Ġguide": 4704, "Ġcaptured": 4705, "ĠSales": 4706, "Ġspecies": 4707, "51": 4708, "Ġar": 4709, "Ġmaster": 4710, "Ġstayed": 4711, "iro": 4712, "ĠEconomic": 4713, "Ġvast": 4714, "ili": 4715, "Ġpet": 4716, "ye": 4717, "77": 4718, "Ġkeeps": 4719, "ĠPhil": 4720, "ĠEPS": 4721, "ĠRegional": 4722, "Ġsectors": 4723, "Ġdesire": 4724, "ĠStanley": 4725, "¾": 4726, "Ġunknown": 4727, "Ġpot": 4728, "ĠPR": 4729, "Ġknowing": 4730, "Ġflying": 4731, "ĠTreasury": 4732, "iers": 4733, "enn": 4734, "ably": 4735, "Ġsick": 4736, "Ġmanner": 4737, "Ġmanufacturers": 4738, "Ġchampions": 4739, "gy": 4740, "Part": 4741, "ister": 4742, "ĠMountain": 4743, "Ġimagine": 4744, "Ġportion": 4745, "ĠCamp": 4746, "Ġchemical": 4747, "ible": 4748, "ĠAnaly": 4749, "ĠBureau": 4750, "Ġpm": 4751, "Ġupdated": 4752, "Ġetc": 4753, "ĠField": 4754, "iles": 4755, "Ġobtained": 4756, "Ġstick": 4757, "Ġcat": 4758, "har": 4759, "Ġmarked": 4760, "Ġmedium": 4761, "ĠDes": 4762, "People": 4763, "Ġwealth": 4764, "ores": 4765, "ĠBaltimore": 4766, "Ġtip": 4767, "Ġdismissed": 4768, "ĠVictoria": 4769, "ĠBrad": 4770, "Ch": 4771, "Ġ56": 4772, "Ġstadium": 4773, "eth": 4774, "Ġthunder": 4775, "Ġtested": 4776, "Ġdrawn": 4777, "Ġcounsel": 4778, "ld": 4779, "Ġspirit": 4780, "uss": 4781, "Ġtheme": 4782, "my": 4783, "Ġnecessarily": 4784, "Ġelements": 4785, "Ġcollected": 4786, "ĠRes": 4787, "ĠMaryland": 4788, "ĠEnter": 4789, "Ġfounded": 4790, "ae": 4791, "Ġpilot": 4792, "Ġshoulder": 4793, "PC": 4794, "Ġargument": 4795, "Ġyen": 4796, "Ġreceiver": 4797, "Ġharm": 4798, "ĠET": 4799, "Ġprotesters": 4800, "Ġ72": 4801, "ĠAaron": 4802, "Ġed": 4803, "Ġexpecting": 4804, "\":\"": 4805, "Ġbike": 4806, "Äĩ": 4807, "Ġluxury": 4808, "half": 4809, "ĠBarbara": 4810, "Ġfoundation": 4811, "Ġill": 4812, "Ġsubmitted": 4813, "Ġdeeply": 4814, "Ġhospitals": 4815, "ĠBJP": 4816, "Ġshock": 4817, "Ġplatforms": 4818, "Ġsummary": 4819, "ĠWhere": 4820, "Ġcelebration": 4821, "iff": 4822, "Ġveterans": 4823, "Ġachieved": 4824, "fl": 4825, "Ġactivists": 4826, "ĠManager": 4827, "Ġformal": 4828, "Ġformed": 4829, "Ġinvestigate": 4830, "ĠKyle": 4831, "Ġ:": 4832, "ĠRa": 4833, "ovic": 4834, "Ġdrinking": 4835, "Ġnetworks": 4836, "ĠAlexander": 4837, "ĠOs": 4838, "Ġ)": 4839, "Ġbomb": 4840, "Ġrecalled": 4841, "ito": 4842, "ient": 4843, "Ġrepresentatives": 4844, "ĠChrist": 4845, "ĠWay": 4846, "Ġdeadly": 4847, "Ġinvesting": 4848, "ĠRussell": 4849, "Ġconsumption": 4850, "Ġharder": 4851, "Ġbail": 4852, "Ġcritics": 4853, "Ġdanger": 4854, "Ġdrew": 4855, "ĠSol": 4856, "Ġcopyright": 4857, "ĠHenry": 4858, "Ġbuyers": 4859, "Ġresidential": 4860, "Ġmaintenance": 4861, "pr": 4862, "Ġmarks": 4863, "Ġages": 4864, "Ġcovers": 4865, "Ġton": 4866, "Ġtitles": 4867, "ĠPS": 4868, "ĠEvans": 4869, "Ġmigrants": 4870, "Ġflights": 4871, "Ġmonitoring": 4872, "Ġaddressed": 4873, "Ġvital": 4874, "Ġcontrolled": 4875, "Ġweapon": 4876, "Ġinches": 4877, "Ġreduction": 4878, "Ġurban": 4879, "Ġcoaching": 4880, "Ġreducing": 4881, "ila": 4882, "Ġrealize": 4883, "Ġmeat": 4884, "Ġref": 4885, "Ġoverseas": 4886, "Ġblame": 4887, "Ġterrorist": 4888, "Ġstuck": 4889, "ĠUs": 4890, "esh": 4891, "pro": 4892, "Ġ58": 4893, "ough": 4894, "Ġexposure": 4895, "ĠAbu": 4896, "state": 4897, "Ġproviders": 4898, "Ġfore": 4899, "Ġjet": 4900, "bar": 4901, "Ġownership": 4902, "ret": 4903, "Ġupset": 4904, "Ġfacts": 4905, "Ġpurchasing": 4906, "Ġreforms": 4907, "Ġriver": 4908, "Ġsomebody": 4909, "Ġguest": 4910, "iy": 4911, "Ġauction": 4912, "ĠReading": 4913, "Ġconsequences": 4914, "Ġrepresentative": 4915, "Ġappointment": 4916, "add": 4917, "Ġcollaboration": 4918, "ĠTesla": 4919, "ĠCohen": 4920, "Ġengagement": 4921, "Ġspeaks": 4922, "EST": 4923, "Ġexposed": 4924, "Ġmaintained": 4925, "rs": 4926, "Ġdating": 4927, "ĠProgram": 4928, "board": 4929, "Ġracing": 4930, "Ġpension": 4931, "ign": 4932, "iti": 4933, "ĠFive": 4934, "Ġextensive": 4935, "ĠHa": 4936, "ĠPoint": 4937, "ĠMexican": 4938, "Ġexpanded": 4939, "Ġtotally": 4940, "Ġinvestigations": 4941, "ĠOrleans": 4942, "Ġcycle": 4943, "ĠESPN": 4944, "ifying": 4945, "Ġcup": 4946, "ĠAz": 4947, "ĠInvestors": 4948, "Ġengage": 4949, "reg": 4950, "Ġfought": 4951, "Ġterrorism": 4952, "Ġblocked": 4953, "ĠOK": 4954, "Äį": 4955, "72": 4956, "Ġdestroyed": 4957, "«": 4958, "Ġstaying": 4959, "Ġafford": 4960, "Ġappearances": 4961, "ĠHills": 4962, "Ġcrore": 4963, "Ġstrategies": 4964, "Ġtips": 4965, "ĠSm": 4966, "ĠFr": 4967, "Ġbanned": 4968, "ĠSon": 4969, "ask": 4970, "Ġlimits": 4971, "Ġrecognition": 4972, "Ġeligible": 4973, "ĠGar": 4974, "Ġvolatility": 4975, "Ġlaid": 4976, "nes": 4977, "Ġgrade": 4978, "ĠRE": 4979, "ĠHart": 4980, "Ġ57": 4981, "oma": 4982, "Ġuncertainty": 4983, "Ġrecognized": 4984, "ĠPC": 4985, "Ġchosen": 4986, "uz": 4987, "Ġadviser": 4988, "una": 4989, "Ġassessment": 4990, "Ġreveal": 4991, "mo": 4992, "After": 4993, "ĠBro": 4994, "ĠOff": 4995, "Ġpeak": 4996, "Ġreferred": 4997, "ĠSC": 4998, "Ġ2003": 4999, "ification": 5000, "Ġshutdown": 5001, "ĠOfficials": 5002, "ias": 5003, "Ġextreme": 5004, "Ġflood": 5005, "Ġhockey": 5006, "Ġwage": 5007, "ĠNet": 5008, "Ġdamaged": 5009, "Ġreplacement": 5010, "ĠMaria": 5011, "Ġcreation": 5012, "Ġguns": 5013, "aci": 5014, "Ġworker": 5015, "do": 5016, "Ġviewers": 5017, "Ġseed": 5018, "sts": 5019, "Ġtouchdowns": 5020, "Ġmistake": 5021, "ray": 5022, "ull": 5023, "Ġpricing": 5024, "Ġstrongly": 5025, "Ġaims": 5026, "ĠNavy": 5027, "ĠEgypt": 5028, "ker": 5029, "Ġve": 5030, "ĠSteven": 5031, "Ġres": 5032, "ational": 5033, "Ġrequests": 5034, "Ġemissions": 5035, "ĠArena": 5036, "uma": 5037, "ĠAtlantic": 5038, "hr": 5039, "ĠAFP": 5040, "ĠSquare": 5041, "Ġcontribute": 5042, "Ġfunction": 5043, "Ġdec": 5044, "ĠNelson": 5045, "89": 5046, "Ġreferendum": 5047, "ĠPre": 5048, "Ġapplied": 5049, "ĠGMT": 5050, "ĠIranian": 5051, "ĠNigerian": 5052, "ĠAny": 5053, "NG": 5054, "Ġacknowledged": 5055, "Ġreferring": 5056, "Ġventure": 5057, "Ġimports": 5058, "Ġblog": 5059, "Ġfutures": 5060, "OU": 5061, "ĠUFC": 5062, "Ġneither": 5063, "Ġextension": 5064, "hes": 5065, "ĠMed": 5066, "76": 5067, "Ġsustainable": 5068, "ains": 5069, "Ġreputation": 5070, "ĠVancouver": 5071, "Ġbasically": 5072, "acy": 5073, "Ġsad": 5074, "ĠFrancis": 5075, "ĠKennedy": 5076, "ĠNevada": 5077, "ĠLu": 5078, "ras": 5079, "ĠAv": 5080, "Ġrear": 5081, "ĠHo": 5082, "Ġproperly": 5083, "abe": 5084, "ĠHotel": 5085, "Ġopinions": 5086, "under": 5087, "ĠStation": 5088, "ĠFOR": 5089, "ops": 5090, "Ġadopted": 5091, "ĠSwiss": 5092, "ĠCountry": 5093, "ĠTer": 5094, "ĠAndy": 5095, "Me": 5096, "ĠCooper": 5097, "ĠTigers": 5098, "ĠCreek": 5099, "Ġgay": 5100, "iner": 5101, "ĠAN": 5102, "Ġbird": 5103, "lla": 5104, "ĠKate": 5105, "ĠPet": 5106, "ni": 5107, "Ġprospects": 5108, "ater": 5109, "ites": 5110, "Ġescape": 5111, "lam": 5112, "ake": 5113, "Ġ1980": 5114, "ĠLag": 5115, "Ġsuccessfully": 5116, "Ġdistricts": 5117, "Ġministers": 5118, "aries": 5119, "Ġframe": 5120, "ĠON": 5121, "ĠEuro": 5122, "ĠMarkets": 5123, "Ġregister": 5124, "Ġdefeated": 5125, "Ġdevelopments": 5126, "Ġninth": 5127, "Ġquiet": 5128, "Ġgenerated": 5129, "Ġvaluable": 5130, "Ġrecommended": 5131, "ĠTheatre": 5132, "ĠCap": 5133, "bed": 5134, "Ġreference": 5135, "Ġease": 5136, "oring": 5137, "Ġ66": 5138, "Ġimprovements": 5139, "Ġelsewhere": 5140, "ĠHillary": 5141, "Ġdefender": 5142, "ĠRight": 5143, "zy": 5144, "Ġcomprehensive": 5145, "Ġspotted": 5146, "ĠOakland": 5147, "ĠOk": 5148, "ĠSystem": 5149, "ique": 5150, "Ġpersons": 5151, "Ġexist": 5152, "Ġbroader": 5153, "Ġclinical": 5154, "Ġ2001": 5155, "oul": 5156, "Ġsecurities": 5157, "ghan": 5158, "Ġshelter": 5159, "ero": 5160, "ATED": 5161, "Ġhosting": 5162, "Ġselect": 5163, "ĠKavanaugh": 5164, "Ġrestrictions": 5165, "osa": 5166, "Ġyields": 5167, "ĠLA": 5168, "Ġ59": 5169, "Ġwonder": 5170, "Ġabsence": 5171, "Ã¼r": 5172, "ÅĤ": 5173, "DP": 5174, "Ġelectronic": 5175, "Ġillegally": 5176, "Ġmicro": 5177, "ĠNEW": 5178, "Ġhall": 5179, "Ġaged": 5180, "Ġtemperature": 5181, "cast": 5182, "atic": 5183, "Ġlegacy": 5184, "Ġaffairs": 5185, "ji": 5186, "ĠResources": 5187, "Ġgang": 5188, "winning": 5189, "Ġattending": 5190, "aro": 5191, "Ġfriendly": 5192, "aine": 5193, "Ġcannabis": 5194, "Ġairline": 5195, "Ġnoting": 5196, "Ġprofessionals": 5197, "ĠFREE": 5198, "RC": 5199, "Ġfinancing": 5200, "Ġindependence": 5201, "ved": 5202, "Ġresulting": 5203, "Ġsteady": 5204, "ĠWinter": 5205, "uring": 5206, "Ġhoped": 5207, "98": 5208, "Ġpresentation": 5209, "aya": 5210, "Ġrated": 5211, "osh": 5212, "ĠAnalysis": 5213, "=": 5214, "Ġdonations": 5215, "IR": 5216, "Ġcombat": 5217, "ĠHoward": 5218, "anda": 5219, "79": 5220, "Ġinvested": 5221, "Ġexpanding": 5222, "omb": 5223, "ress": 5224, "ble": 5225, "Ġjournalist": 5226, "ĠWoods": 5227, "Ġcenters": 5228, "ott": 5229, "Ġstreaming": 5230, "Ġterror": 5231, "Ġsustained": 5232, "ĠWWE": 5233, "pre": 5234, "ÅŁ": 5235, "ait": 5236, "Ġarrival": 5237, "Ġresidence": 5238, "Ġextent": 5239, "Ġarrive": 5240, "Ġ2002": 5241, "Ġestablish": 5242, "74": 5243, "ĠArgentina": 5244, "ĠDem": 5245, "inn": 5246, "aud": 5247, "ĠNCAA": 5248, "Ġquestioned": 5249, "Ġballot": 5250, "Ġmin": 5251, "Ġlandscape": 5252, "Ġhorse": 5253, "Ġopponent": 5254, "iel": 5255, "Ġprompted": 5256, "atory": 5257, "Ġlift": 5258, "Ġassociation": 5259, "cher": 5260, "Ġdefending": 5261, "Ġtiny": 5262, "Ġpoverty": 5263, "ĠSafety": 5264, "Ġpetition": 5265, "ĠLimited": 5266, "ĠCA": 5267, "FC": 5268, "Ãł": 5269, "oni": 5270, "Ġmonitor": 5271, "ÃŃa": 5272, "MA": 5273, "Ġanswers": 5274, "ĠMitchell": 5275, "Ġbo": 5276, "ĠShah": 5277, "Ġsm": 5278, "Ġmedal": 5279, "ĠCivil": 5280, "Ġrecognize": 5281, "key": 5282, "Ġpregnant": 5283, "Ġspots": 5284, "ante": 5285, "Ġacademic": 5286, "Ġinitiatives": 5287, "Ġsecured": 5288, "ĠCL": 5289, "ils": 5290, "Ġanticipated": 5291, "Ġinvolvement": 5292, "ĠMake": 5293, "Ġinsisted": 5294, "ĠWales": 5295, "Ġclothing": 5296, "Ġtracks": 5297, "Ġsymptoms": 5298, "Ġplate": 5299, "ĠNY": 5300, "Ġretailers": 5301, "ĠPan": 5302, "Ġfled": 5303, "Ġquoted": 5304, "Ġsaved": 5305, "ĠCarter": 5306, "Ġteaching": 5307, "ĠTokyo": 5308, "ĠCr": 5309, "ĠSix": 5310, "ĠPicture": 5311, "Ġrecover": 5312, "Ġcomedy": 5313, "ree": 5314, "Ġstrikes": 5315, "ĠSanders": 5316, "sel": 5317, "Ġgraduate": 5318, "Ġpending": 5319, "St": 5320, "Ġwarrant": 5321, "Ġhonest": 5322, "ĠGM": 5323, "Ġnoticed": 5324, "ĠGalaxy": 5325, "ider": 5326, "Ġproposals": 5327, "Ġwore": 5328, "Ġindeed": 5329, "EM": 5330, "ĠChannel": 5331, "ances": 5332, "ĠBrady": 5333, "86": 5334, "Ġgotten": 5335, "Ġthrowing": 5336, "ĠLeader": 5337, "ĠVideo": 5338, "71": 5339, "Ġwelcomed": 5340, "NEW": 5341, "Ġfairly": 5342, "Ġpromises": 5343, "ĠSilver": 5344, "Ġrape": 5345, "Ġopener": 5346, "ares": 5347, "ĠSir": 5348, "making": 5349, "Ġcur": 5350, "Ġrooms": 5351, "73": 5352, "Ġamounts": 5353, "ĠIndustry": 5354, "ĠDar": 5355, "Ġ62": 5356, "ted": 5357, "Ġabroad": 5358, "ĠMaybe": 5359, "Ġreaders": 5360, "oke": 5361, "Ġpublication": 5362, "ĠJean": 5363, "Ġoperator": 5364, "ĠHaving": 5365, "ĠMil": 5366, "life": 5367, "Ġgenerate": 5368, "ĠCraig": 5369, "ĠMass": 5370, "ĠBh": 5371, "Ġrequested": 5372, "Ġcrazy": 5373, "ĠSpace": 5374, "Ġcopy": 5375, "Ġexport": 5376, "Ġcontext": 5377, "Ġbr": 5378, "62": 5379, "ĠRobinson": 5380, "Ġcyber": 5381, "ENT": 5382, "BI": 5383, "arg": 5384, "Ġspeaker": 5385, "Ġdramatic": 5386, "ĠOl": 5387, "ĠMill": 5388, "Ġtrained": 5389, "Ġediting": 5390, "Ġsalary": 5391, "Ġdirectors": 5392, "Ġexplore": 5393, "Ġlucky": 5394, "Ġprominent": 5395, "Ġbrothers": 5396, "Ġneck": 5397, "icht": 5398, "ĠWatson": 5399, "born": 5400, "Ġproven": 5401, "Ġprincipal": 5402, "Ġedition": 5403, "Ed": 5404, "Ġswitch": 5405, "maker": 5406, "Ġrelative": 5407, "mi": 5408, "ĠBruce": 5409, "ho": 5410, "ĠScottish": 5411, "water": 5412, "ĠSport": 5413, "ĠKings": 5414, "ĠCollins": 5415, "adi": 5416, "Ġcelebrated": 5417, "Ġclothes": 5418, "Ġsunny": 5419, "ĠCharlotte": 5420, "ees": 5421, "Ġscenes": 5422, "ĠData": 5423, "Ġwounded": 5424, "Ġunusual": 5425, "Ġrealized": 5426, "ĠPlan": 5427, "ĠTrans": 5428, "ĠFC": 5429, "Ġletters": 5430, "Ġalerts": 5431, "ĠWarren": 5432, "DS": 5433, "oss": 5434, "pping": 5435, "Ġsuspension": 5436, "Ġbenchmark": 5437, "ĠAcc": 5438, "Ġalert": 5439, "Ġpassion": 5440, "ĠEst": 5441, "Ġlatter": 5442, "Ġstability": 5443, "Ġarts": 5444, "Ġpursue": 5445, "ĠSeason": 5446, "Ġfields": 5447, "Ġmethod": 5448, "63": 5449, "Ġfolks": 5450, "Ġexclusive": 5451, "Ġcrews": 5452, "Ġsessions": 5453, "ĠMajor": 5454, "ĠMount": 5455, "Ġmap": 5456, "Ġ=": 5457, "Ġsituations": 5458, "ĠBerlin": 5459, "rey": 5460, "Ġdates": 5461, "Ġsheet": 5462, "ĠLo": 5463, "Ġfighters": 5464, "ĠMart": 5465, "Ġatmosphere": 5466, "Ġillness": 5467, "Ġcompeting": 5468, "ĠChristopher": 5469, "ĠRoy": 5470, "mm": 5471, "iano": 5472, "Ġge": 5473, "ĠRams": 5474, "Ġconversations": 5475, "ĠPa": 5476, "ĠTel": 5477, "Ġappreciate": 5478, "78": 5479, "ĠTotal": 5480, "low": 5481, "ĠStone": 5482, "Ġopposite": 5483, "Ġbarrel": 5484, "Ġdevelopers": 5485, "Ġexpress": 5486, "Ġhighs": 5487, "which": 5488, "par": 5489, "ĠVietnam": 5490, "Ġblocks": 5491, "Ġrecording": 5492, "Ġadjusted": 5493, "Ġret": 5494, "ĠAR": 5495, "Ġmilitants": 5496, "Ġinnovative": 5497, "ĠGhana": 5498, "FR": 5499, "Ġfantastic": 5500, "Ġmortgage": 5501, "ando": 5502, "ĠLane": 5503, "ises": 5504, "ĠÂ": 5505, "Ġhomeless": 5506, "ĠKal": 5507, "Ġapproached": 5508, "Ġrounds": 5509, "Ġmargins": 5510, "ament": 5511, "ĠMotor": 5512, "Ġencouraging": 5513, "ÂŃ": 5514, "uru": 5515, "Ġhandling": 5516, "ĠMassachusetts": 5517, "Ġplanet": 5518, "ĠSpring": 5519, "ĠBon": 5520, "gu": 5521, "Beat": 5522, "Ġdrawing": 5523, "ĠPhoenix": 5524, "very": 5525, "aid": 5526, "ĠSte": 5527, "ĠEntertainment": 5528, "ĠRon": 5529, "Ġassigned": 5530, "ĠSA": 5531, "News": 5532, "Ġinterviews": 5533, "ĠOh": 5534, "media": 5535, "vel": 5536, "Ġpermission": 5537, "Ġtransactions": 5538, "Ġtraders": 5539, "Ġsolo": 5540, "Ġprovincial": 5541, "Ġsuggesting": 5542, "¡": 5543, "Ġdiverse": 5544, "Ġ67": 5545, "Ġranks": 5546, "ĠFre": 5547, "Ġfavourite": 5548, "Ġ63": 5549, "Ġdifferences": 5550, "Ġtargeting": 5551, "Ġactors": 5552, "Ġ76": 5553, "icated": 5554, "Ġcollect": 5555, "akes": 5556, "war": 5557, "Ġcontained": 5558, "ches": 5559, "Ġlibrary": 5560, "Ġsegments": 5561, "ĠLine": 5562, "Ãª": 5563, "ual": 5564, "Ġbags": 5565, "Ġfactory": 5566, "Ġear": 5567, "Ġsomewhat": 5568, "Ġrail": 5569, "ĠUP": 5570, "ula": 5571, "ĠNiger": 5572, "Ġlas": 5573, "Ġimplementation": 5574, "Ġemails": 5575, "kel": 5576, "wing": 5577, "Ġadvised": 5578, "--": 5579, "istic": 5580, "Ġdepth": 5581, "Ġshoes": 5582, "ĠJennifer": 5583, "Ġvenue": 5584, "Ġcontain": 5585, "Ġhighlights": 5586, "Ġcapabilities": 5587, "Ġprocesses": 5588, "Ġtradition": 5589, "Ġcontacted": 5590, "Ġproducing": 5591, "Ġtrail": 5592, "rem": 5593, "Ġ600": 5594, "Ġ68": 5595, "AA": 5596, "ĠBa": 5597, "ĠSuch": 5598, "ĠTyler": 5599, "ipp": 5600, "Ġsurvived": 5601, "ami": 5602, "ĠContinue": 5603, "Ġcapture": 5604, "bi": 5605, "61": 5606, "96": 5607, "Ġthreatening": 5608, "Ġkeen": 5609, "dale": 5610, "Ġtrailer": 5611, "Ġstages": 5612, "ĠGordon": 5613, "Ġfinishing": 5614, "Ġlegislative": 5615, "Ġuseful": 5616, "ĠGreek": 5617, "ald": 5618, "Ġgrounds": 5619, "ĠDu": 5620, "storms": 5621, "ills": 5622, "Ġexpense": 5623, "Ġdetained": 5624, "Today": 5625, "Ġdiet": 5626, "Ġwood": 5627, "ĠCameron": 5628, "Ġthrown": 5629, "Ġcricket": 5630, "Ġideal": 5631, "with": 5632, "Ġteammates": 5633, "ours": 5634, "Ġprojected": 5635, "Ġpersonally": 5636, "ĠBoy": 5637, "rom": 5638, "ĠPhilippines": 5639, "win": 5640, "ges": 5641, "Ġcounties": 5642, "ĠBaker": 5643, "Ġprosecutor": 5644, "Ġroof": 5645, "met": 5646, "Ġpartly": 5647, "ĠMoon": 5648, "eman": 5649, "Ġfocusing": 5650, "Ġfishing": 5651, "than": 5652, "ĠJeremy": 5653, "ĠBad": 5654, "ais": 5655, "Ġcontrols": 5656, "Ġtonnes": 5657, "Ġshall": 5658, "Ġ61": 5659, "Ġgathering": 5660, "ĠERA": 5661, "Ġpresidency": 5662, "Ġ85": 5663, "ĠGas": 5664, "Ġscenario": 5665, "Ġquarters": 5666, "Ġang": 5667, "Ġsettled": 5668, "ĠCommerce": 5669, "Ġanybody": 5670, "Ġgarden": 5671, "ĠLibrary": 5672, "Ġbet": 5673, "Ġtopic": 5674, "olo": 5675, "Ġintense": 5676, "87": 5677, "Ġlinks": 5678, "Ġmed": 5679, "ĠAG": 5680, "Ġflooding": 5681, "ĠMurphy": 5682, "PM": 5683, "Ġfinds": 5684, "Ġsensitive": 5685, "pped": 5686, "Ġcompletion": 5687, "Ġminority": 5688, "Ġvon": 5689, "Ġstriking": 5690, "rich": 5691, "Ġbars": 5692, "Ġefficient": 5693, "Ġcontributions": 5694, "Ġvisits": 5695, "Ġattract": 5696, "ĠMalaysia": 5697, "ĠREL": 5698, "Ġopens": 5699, "Ġessentially": 5700, "Ġreasonable": 5701, "Ġsentiment": 5702, "ĠMelbourne": 5703, "Ġfitness": 5704, "Ġfrequently": 5705, "ĠRangers": 5706, "Ġmuseum": 5707, "ĠDNA": 5708, "Ġcontrast": 5709, "ĠAdams": 5710, "ĠWin": 5711, "Ġfalls": 5712, "Ġimposed": 5713, "250": 5714, "ood": 5715, "ĠRio": 5716, "Ġchoices": 5717, "Ġyellow": 5718, "rin": 5719, "ben": 5720, "ĠStaff": 5721, "ĠIndonesia": 5722, "Ġcarries": 5723, "Ġtourism": 5724, "UM": 5725, "ĠOrange": 5726, "sell": 5727, "Ġresolve": 5728, "ĠMumbai": 5729, "Ġpan": 5730, "Ġimplement": 5731, "Ġmidfielder": 5732, "OP": 5733, "Ġtensions": 5734, "Ġ800": 5735, "ĠLord": 5736, "ĠLight": 5737, "Ġlies": 5738, "Ã©s": 5739, "Ġparticipation": 5740, "Ġtries": 5741, "Ġsheriff": 5742, "degree": 5743, "Ġcongressional": 5744, "Ġmode": 5745, "Ġregulation": 5746, "ĠJacob": 5747, "ĠCrown": 5748, "Ġbowl": 5749, "ĠMississippi": 5750, "Ġtheft": 5751, "ĠKingdom": 5752, "Ġresort": 5753, "Ġroyal": 5754, "Ġunemployment": 5755, "PP": 5756, "Ġnomination": 5757, "ĠTR": 5758, "Ġbehaviour": 5759, "bank": 5760, "ĠForest": 5761, "WASHINGTON": 5762, "ĠOthers": 5763, "Ġslowly": 5764, "Ġmenu": 5765, "vo": 5766, "ĠSy": 5767, "ĠMetro": 5768, "ĠLisa": 5769, "Ġregistration": 5770, "While": 5771, "ĠJesus": 5772, "Ġ250": 5773, "Ġprocessing": 5774, "Ġmonetary": 5775, "ape": 5776, "ener": 5777, "ĠSystems": 5778, "Ġdisappointed": 5779, "Ġprint": 5780, "uy": 5781, "ħ": 5782, "Ġdemanding": 5783, "Ġincredibly": 5784, "play": 5785, "Ġsurveillance": 5786, "ĠStandard": 5787, "Ġperiods": 5788, "Ġwrites": 5789, "ĠLuke": 5790, "ĠPalestinian": 5791, "Ġwalks": 5792, "Ġriding": 5793, "Ġwaters": 5794, "ĠSox": 5795, "Ġtraveling": 5796, "Ġtap": 5797, "Ġorganized": 5798, "Ġresource": 5799, "Ġangry": 5800, "Ġtiming": 5801, "Ġempty": 5802, "Ġmilk": 5803, "Ġtherapy": 5804, "ĠBrandon": 5805, "mon": 5806, "Ġnationwide": 5807, "Ġnovel": 5808, "ĠStorm": 5809, "iet": 5810, "ĠBre": 5811, "Ġbegun": 5812, "Ġdiplomatic": 5813, "Ġads": 5814, "ĠDC": 5815, "ĠOb": 5816, "ĠMontreal": 5817, "ĠDown": 5818, "ĠMilwaukee": 5819, "Ġmeal": 5820, "ĠPuerto": 5821, "ĠMas": 5822, "Ġjoy": 5823, "Ġdeparture": 5824, "ĠWright": 5825, "Ġspoken": 5826, "style": 5827, "ĠAction": 5828, "ĠComey": 5829, "Ġdelivering": 5830, "Ġtoll": 5831, "Ġmidnight": 5832, "ĠRevenue": 5833, "Ġfiring": 5834, "Ġstunning": 5835, "Ġkicked": 5836, "ĠOttawa": 5837, "Ġefficiency": 5838, "ĠLincoln": 5839, "Ġtaste": 5840, "ez": 5841, "ĠWeather": 5842, "ĠMorning": 5843, "Ġhadn": 5844, "Ġdiversity": 5845, "ily": 5846, "ĠAy": 5847, "Ġargue": 5848, "Ġerror": 5849, "Ġtaught": 5850, "Ġche": 5851, "Ġoccasion": 5852, "Ġinc": 5853, "ĠOrlando": 5854, "ĠOnline": 5855, "Ġlegs": 5856, "ĠNation": 5857, "uck": 5858, "Ġwidespread": 5859, "ĠOcean": 5860, "Ġconstantly": 5861, "ĠLatin": 5862, "Ġcomfort": 5863, "Ġrely": 5864, "uff": 5865, "ĠCard": 5866, "aring": 5867, "Ġhumans": 5868, "ĠThomson": 5869, "aka": 5870, "BIT": 5871, "ĠReview": 5872, "po": 5873, "Ãº": 5874, "Ġtrucks": 5875, "Ġforecasts": 5876, "view": 5877, "Ġlongtime": 5878, "ĠConstitution": 5879, "Ġreserves": 5880, "bit": 5881, "Ġstressed": 5882, "Ġcontribution": 5883, "Ġchicken": 5884, "ĠDE": 5885, "Ġfat": 5886, "ĠOscar": 5887, "Ġcriticized": 5888, "Ġtestimony": 5889, "Ġapparent": 5890, "Ġconstant": 5891, "Ġcabinet": 5892, "ĠDuke": 5893, "Ġaspects": 5894, "lic": 5895, "ĠVol": 5896, "Ġwing": 5897, "Ġreb": 5898, "ĠSessions": 5899, "ĠSmart": 5900, "car": 5901, "ĠIm": 5902, "Ġoperational": 5903, "Ġregulators": 5904, "ĠJimmy": 5905, "eter": 5906, "Ġnobody": 5907, "ĠMarc": 5908, "Ġliterally": 5909, "Ġresistance": 5910, "ĠKam": 5911, "Ġsexually": 5912, "Ġ69": 5913, "uth": 5914, "Ġviewed": 5915, "Ġpicks": 5916, "Ġdin": 5917, "Ġtalented": 5918, "Ġtennis": 5919, "Ġstrengthen": 5920, "Ġgl": 5921, "ĠProtection": 5922, "Ġinstalled": 5923, "ways": 5924, "ĠCampbell": 5925, "ĠPortland": 5926, "Ġintent": 5927, "ĠPalace": 5928, "Ġsecondary": 5929, "Ġlocked": 5930, "ĠPA": 5931, "Ġlanded": 5932, "Ġlength": 5933, "Ġboosted": 5934, "Ġpurchases": 5935, "Ġcommand": 5936, "ĠAsked": 5937, "Ġspaces": 5938, "Ġiconic": 5939, "Ġrecommend": 5940, "Ġduties": 5941, "Ġseized": 5942, "Ġdelayed": 5943, "FA": 5944, "AND": 5945, "daq": 5946, "Ġhiring": 5947, "Ġoccur": 5948, "DC": 5949, "ĠMus": 5950, "Ġag": 5951, "Ġhopefully": 5952, "ĠPenn": 5953, "ards": 5954, "Ġstriker": 5955, "Ġrent": 5956, "ĠTy": 5957, "ĠBuffalo": 5958, "ĠKy": 5959, "Ġhike": 5960, "pper": 5961, "Ġ120": 5962, "Ġop": 5963, "Ġwheel": 5964, "ĠIan": 5965, "Ġchart": 5966, "tt": 5967, "Ġvolunteer": 5968, "IG": 5969, "person": 5970, "ight": 5971, "ĠBook": 5972, "unt": 5973, "ĠTechnologies": 5974, "Now": 5975, "Ġfavour": 5976, "ĠGh": 5977, "ĠQatar": 5978, "ĠDutch": 5979, "ĠGrant": 5980, "ĠBan": 5981, "rel": 5982, "Ġagreements": 5983, "Ġeducational": 5984, "worth": 5985, "ĠWard": 5986, "700": 5987, "Ġanymore": 5988, "Ġrepair": 5989, "Ġoperators": 5990, "ĠLi": 5991, "ots": 5992, "ĠLouisiana": 5993, "ĠWhether": 5994, "Ġodds": 5995, "Ġnoon": 5996, "ĠStr": 5997, "Ġfail": 5998, "iser": 5999, "Ġforever": 6000, "Ġrecall": 6001, "ĠPo": 6002, "ĠHot": 6003, "Ġdesigner": 6004, "ido": 6005, "LL": 6006, "ĠControl": 6007, "Ġsurvive": 6008, "iam": 6009, "Ġorganisation": 6010, "ĠWork": 6011, "Ġwider": 6012, "Ġtank": 6013, "work": 6014, "ĠAS": 6015, "Ġposting": 6016, "Ġsuddenly": 6017, "MC": 6018, "ĠAL": 6019, "ĠProfessor": 6020, "ĠCoach": 6021, "Ġrushed": 6022, "Ġafraid": 6023, "Ġactivist": 6024, "that": 6025, "ĠFilm": 6026, "Ġbacking": 6027, "Ġhousehold": 6028, "Ġsignal": 6029, "Ġaccurate": 6030, "str": 6031, "ĠThread": 6032, "ĠBears": 6033, "ATION": 6034, "ĠAlliance": 6035, "ĠMcDonald": 6036, "ĠVenezuela": 6037, "ogg": 6038, "ĠWindows": 6039, "makers": 6040, "Ġutility": 6041, "Ġrapidly": 6042, "Ġattractive": 6043, "Ġpa": 6044, "ĠLarry": 6045, "Ġmisconduct": 6046, "Ġfreshman": 6047, "Ġqualified": 6048, "Ġcleared": 6049, "Ġcrashed": 6050, "Ġparticipating": 6051, "Ġpages": 6052, "Ġhighlight": 6053, "Ġdialogue": 6054, "ĠAlberta": 6055, "Ġca": 6056, "Ġwitnesses": 6057, "ables": 6058, "Ġfollowers": 6059, "Ġensuring": 6060, "Ġpromoting": 6061, "Ġsearching": 6062, "Ġremote": 6063, "Ġclash": 6064, "Ġfirefighters": 6065, "Ġteen": 6066, "ĠPlace": 6067, "ĠNote": 6068, "Ġregardless": 6069, "ult": 6070, "oney": 6071, "ander": 6072, "ional": 6073, "ining": 6074, "Ġdemanded": 6075, "ĠCommunications": 6076, "Ġconsideration": 6077, "TC": 6078, "ĠSoutheast": 6079, "aga": 6080, "ĠGarden": 6081, "inger": 6082, "ht": 6083, "Ġbranch": 6084, "Ġmouth": 6085, "Ġaudio": 6086, "Ġraw": 6087, "Ġcoordinator": 6088, "Ġexact": 6089, "ĠHan": 6090, "Ġdelays": 6091, "ĠWal": 6092, "ĠWells": 6093, "Ġng": 6094, "Ġhandful": 6095, "Ġgirlfriend": 6096, "Ġtypical": 6097, "ĠWayne": 6098, "ĠFranklin": 6099, "Ġconstitutional": 6100, "ĠChance": 6101, "Ġblamed": 6102, "rim": 6103, "Ġpreliminary": 6104, "Ġlie": 6105, "da": 6106, "ĠCapitol": 6107, "Ġroutine": 6108, "ĠNASA": 6109, "Ġtre": 6110, "ĠGolf": 6111, "Ġsight": 6112, "ĠDer": 6113, "Ġreserve": 6114, "150": 6115, "Ġspeculation": 6116, "Ġcompetitors": 6117, "ĠMacron": 6118, "ony": 6119, "Ġovertime": 6120, "Ġ71": 6121, "Ġdepending": 6122, "ĠWarner": 6123, "Ġaccusations": 6124, "ius": 6125, "Ġpredicted": 6126, "ĠCharlie": 6127, "Ġeverywhere": 6128, "Ġcable": 6129, "ĠSaint": 6130, "ĠRegion": 6131, "Ġhero": 6132, "ĠEmb": 6133, "Ġkinds": 6134, "Ġstarter": 6135, "Ġsolve": 6136, "ĠGuard": 6137, "Ġloves": 6138, "ĠDouglas": 6139, "Ġfunded": 6140, "ĠBrent": 6141, "ĠAnyone": 6142, "Ġsubstantial": 6143, "ĠMarine": 6144, "ĠMichelle": 6145, "Ġcelebrating": 6146, "Ġoffset": 6147, "Ġbutton": 6148, "gg": 6149, "Ġmedicine": 6150, "uri": 6151, "Ġsomewhere": 6152, "PD": 6153, "Ġmon": 6154, "Ġfires": 6155, "final": 6156, "oth": 6157, "ined": 6158, "Ġunderway": 6159, "Ġmistakes": 6160, "Ġgrateful": 6161, "Ġcheap": 6162, "È": 6163, "Ġ95": 6164, "Ġviolations": 6165, "arr": 6166, "Ġsurprising": 6167, "Ġob": 6168, "ĠNATO": 6169, "Ġcontroversy": 6170, "ĠSweden": 6171, "Ġfuneral": 6172, "Ġreviews": 6173, "Ġpromotion": 6174, "TY": 6175, "Ġliberal": 6176, "Ġpromising": 6177, "ĠSP": 6178, "How": 6179, "Ġmemories": 6180, "Ġbreast": 6181, "zi": 6182, "ights": 6183, "Ġpattern": 6184, "Ġoutdoor": 6185, "ĠMu": 6186, "Ġrush": 6187, "ĠTheresa": 6188, "ĠPol": 6189, "Ġdescribe": 6190, "ĠBand": 6191, "ĠStewart": 6192, "Ġ1999": 6193, "ĠRaiders": 6194, "mp": 6195, "Ġprocedures": 6196, "Ġplot": 6197, "Ġhire": 6198, "used": 6199, "Ġ1970": 6200, "Ġpicking": 6201, "ĠSim": 6202, "Ġregard": 6203, "inal": 6204, "backs": 6205, "ĠHard": 6206, "ĠLow": 6207, "ĠAc": 6208, "Is": 6209, "Ġguarantee": 6210, "ĠGiven": 6211, "Ġbeta": 6212, "ĠTre": 6213, "Ġtrans": 6214, "Ġretailer": 6215, "Ġpurposes": 6216, "ĠHol": 6217, "Ġenjoying": 6218, "Ġbrown": 6219, "ĠPerry": 6220, "Ġplea": 6221, "MS": 6222, "ĠDakota": 6223, "ĠParker": 6224, "Ġcommit": 6225, "ĠLawrence": 6226, "ĠMorris": 6227, "ended": 6228, "Ġvirtual": 6229, "ÃĹ": 6230, "Ġfruit": 6231, "84": 6232, "ĠHas": 6233, "ishing": 6234, "Ġdominated": 6235, "ĠFA": 6236, "Ġchannels": 6237, "Ġunderstood": 6238, "Ġcitizen": 6239, "Ġchecks": 6240, "ĠKenya": 6241, "Ġdisabled": 6242, "SD": 6243, "Ġprotecting": 6244, "Ġtweets": 6245, "Ġsparked": 6246, "ĠCO": 6247, "§": 6248, "ori": 6249, "ĠGDP": 6250, "ĠSer": 6251, "ĠVisit": 6252, "ĠMS": 6253, "Ġbarely": 6254, "Ġsand": 6255, "Ġap": 6256, "aging": 6257, "Ġrel": 6258, "ĠPerhaps": 6259, "ĠMourinho": 6260, "ĠJets": 6261, "Ġdisclosure": 6262, "Ġhighlighted": 6263, "Ġimplemented": 6264, "Ġcompliance": 6265, "ĠAB": 6266, "ĠAssistant": 6267, "ĠCape": 6268, "Ġfunny": 6269, "Ġleverage": 6270, "Ġmachines": 6271, "Ġranging": 6272, "Ġfastest": 6273, "ĠRoberts": 6274, "ĠPolicy": 6275, "gar": 6276, "Ġcollapse": 6277, "ĠThrough": 6278, "Ġrobbery": 6279, "ĠHay": 6280, "Ġelite": 6281, "ĠDigital": 6282, "ĠFun": 6283, "ĠAlan": 6284, "ement": 6285, "Ġmit": 6286, "Ġspin": 6287, "Ġlistening": 6288, "ĠDoug": 6289, "ĠSaints": 6290, "Ġinterior": 6291, "Ġenhance": 6292, "ĠCardinals": 6293, "ever": 6294, "Ġrobust": 6295, "Ġinform": 6296, "Ġsuffer": 6297, "book": 6298, "ĠMuslims": 6299, "Ġagriculture": 6300, "Ġkm": 6301, "Ġdivers": 6302, "Ã±": 6303, "ĠReg": 6304, "Ġequivalent": 6305, "Ġcraft": 6306, "Ġsettle": 6307, "Ġcontains": 6308, "ĠMack": 6309, "ĠDis": 6310, "ĠFore": 6311, "ĠSudan": 6312, "ĠMail": 6313, "ĠBrooklyn": 6314, "izer": 6315, "bn": 6316, "Ġhundred": 6317, "Ġexhibition": 6318, "ĠHave": 6319, "vin": 6320, "Ġcivilians": 6321, "ĠCincinnati": 6322, "Some": 6323, "ĠSE": 6324, "Ġbat": 6325, "ĠIns": 6326, "Ġcalm": 6327, "Ġtone": 6328, "Ġnormally": 6329, "Ġseeks": 6330, "ĠAss": 6331, "Ġmembership": 6332, "Ġannually": 6333, "Ġemployers": 6334, "CO": 6335, "Ġcomplicated": 6336, "Ġheadlines": 6337, "ĠLabor": 6338, "Ġlifestyle": 6339, "ĠRen": 6340, "ĠRich": 6341, "cent": 6342, "ude": 6343, "Ġawesome": 6344, "Ġpaint": 6345, "Ġrolling": 6346, "Ġwalls": 6347, "Ġlab": 6348, "Ġtourists": 6349, "care": 6350, "Ġgear": 6351, "izz": 6352, "Ġcream": 6353, "ĠTro": 6354, "ices": 6355, "Ġpack": 6356, "Ġdiseases": 6357, "ĠSpeaker": 6358, "ĠOfficers": 6359, "Ġsky": 6360, "83": 6361, "ĠBE": 6362, "Ġcategories": 6363, "Ġindicate": 6364, "Ġru": 6365, "ĠSony": 6366, "ĠDun": 6367, "ocks": 6368, "Ġconcrete": 6369, "ĠMadison": 6370, "ĠSab": 6371, "IV": 6372, "Ġobserved": 6373, "ria": 6374, "Ġinterim": 6375, "Ġencounter": 6376, "ista": 6377, "Ġanger": 6378, "Ġrapid": 6379, "mail": 6380, "Ġdestination": 6381, "ĩ": 6382, "Ġbreaks": 6383, "rell": 6384, "ĠChase": 6385, "Ġattorneys": 6386, "Ġrolled": 6387, "ĠSprings": 6388, "ĠVillage": 6389, "TO": 6390, "HS": 6391, "Ġcampaigns": 6392, "ologist": 6393, "ĠTax": 6394, "ĠIII": 6395, "Ġteach": 6396, "Ġprovision": 6397, "Ġrem": 6398, "Ġshirt": 6399, "Ġdeployed": 6400, "Ġguidelines": 6401, "Ġav": 6402, "zer": 6403, "Ġrushing": 6404, "94": 6405, "place": 6406, "Man": 6407, "Ġdivided": 6408, "ĠGun": 6409, "Ġwindows": 6410, "Ġcomponents": 6411, "aba": 6412, "ĠSwitzerland": 6413, "election": 6414, "ĠTampa": 6415, "ĠAri": 6416, "Ã¡s": 6417, "Ġhighway": 6418, "Ġacres": 6419, "Ġcrown": 6420, "known": 6421, "Ġinquiry": 6422, "url": 6423, "Ġexpertise": 6424, "Ġpraised": 6425, "yer": 6426, "Ġconclusion": 6427, "Ġabortion": 6428, "Ġlady": 6429, "Ġtribute": 6430, "Ġunveiled": 6431, "Ġbeaten": 6432, "TE": 6433, "ĠMot": 6434, "unk": 6435, "Ġtriple": 6436, "Ġforcing": 6437, "ĠTickets": 6438, "uit": 6439, "Ġiron": 6440, "Ġscientific": 6441, "ĠIP": 6442, "Ġdiagnosed": 6443, "Ġocean": 6444, "wide": 6445, "ĠCowboys": 6446, "LC": 6447, "Ġmethods": 6448, "ĠFind": 6449, "ĠDean": 6450, "Ġfundamental": 6451, "ĠGill": 6452, "Ġfeelings": 6453, "IO": 6454, "hu": 6455, "Ġfeedback": 6456, "ote": 6457, "Ġduo": 6458, "fully": 6459, "get": 6460, "Ġproof": 6461, "story": 6462, "Ġlongest": 6463, "Ġshops": 6464, "ĠJong": 6465, "ĠCro": 6466, "ĠHawaii": 6467, "91": 6468, "ĠJake": 6469, "ĠSusan": 6470, "Ġsubmit": 6471, "rav": 6472, "Ġmodest": 6473, "Ġlit": 6474, "Ġattempting": 6475, "Ġsits": 6476, "Ġaddressing": 6477, "93": 6478, "ĠBi": 6479, "Ġlying": 6480, "ĠOrganization": 6481, "ĠOak": 6482, "oli": 6483, "Ġfatal": 6484, "Ġmountain": 6485, "val": 6486, "lu": 6487, "ĠMaine": 6488, "Ġcharging": 6489, "Ġresigned": 6490, "illo": 6491, "Ġrecommendation": 6492, "party": 6493, "ĠWeb": 6494, "ĠPanthers": 6495, "Ġnoise": 6496, "ĠBrussels": 6497, "awa": 6498, "Ġambassador": 6499, "Ġaccessible": 6500, "ĠCalgary": 6501, "idd": 6502, "ĠAirlines": 6503, "gr": 6504, "Ġnu": 6505, "roy": 6506, "ĠMars": 6507, "ĠPoland": 6508, "ĠJerry": 6509, "ados": 6510, "ĠRico": 6511, "ĠMir": 6512, "ĠFin": 6513, "ious": 6514, "Ġpacked": 6515, "Ġinsider": 6516, "President": 6517, "ĠBull": 6518, "ĠYemen": 6519, "ĠConnecticut": 6520, "Ġ73": 6521, "Ġdepartments": 6522, "Ġorganic": 6523, "ĠSummer": 6524, "ĠBet": 6525, "ste": 6526, "zo": 6527, "rat": 6528, "Ġalliance": 6529, "Ġintervention": 6530, "wan": 6531, "ĠOR": 6532, "Ġdefined": 6533, "ĠÃł": 6534, "ĠChiefs": 6535, "Ġknocked": 6536, "ared": 6537, "Ġholes": 6538, "Ġpulling": 6539, "ĠTodd": 6540, "ĠJamie": 6541, "ĠSher": 6542, "Ġsignature": 6543, "ĠSur": 6544, "Ġgym": 6545, "ĠVladimir": 6546, "ĠThailand": 6547, "Ġgaming": 6548, "Ġsaving": 6549, "ceive": 6550, "82": 6551, "ĠBern": 6552, "ĠDid": 6553, "Ġhardware": 6554, "ished": 6555, "Ġconspiracy": 6556, "ANS": 6557, "ĠIntelligence": 6558, "Ġassembly": 6559, "Ġ101": 6560, "Ġconcise": 6561, "ĠManhattan": 6562, "Ġbelief": 6563, "Ġsurge": 6564, "Ġdeserve": 6565, "Ġconsistently": 6566, "ĠNor": 6567, "okes": 6568, "ðŁ": 6569, "ME": 6570, "ĠAsset": 6571, "Ġsubstance": 6572, "Ġprefer": 6573, "Ġburning": 6574, "ĠNik": 6575, "ook": 6576, "ĠPinterest": 6577, "Ġboyfriend": 6578, "ĠHal": 6579, "ĠMerkel": 6580, "Ġintroduce": 6581, "ĠLinkedIn": 6582, "ĠFull": 6583, "ĠFarm": 6584, "Ġchildhood": 6585, "ĠTransportation": 6586, "Ġterrible": 6587, "du": 6588, "Ġintention": 6589, "Ġseemingly": 6590, "elle": 6591, "Ġfoods": 6592, "Ġtitled": 6593, "Ġdual": 6594, "Ġimport": 6595, "Ġdeveloper": 6596, "UL": 6597, "ington": 6598, "ĠDelta": 6599, "?'": 6600, "iness": 6601, "Ġquit": 6602, "ĠGarcia": 6603, "ĠSri": 6604, "Ġhip": 6605, "ĠBrazilian": 6606, "elt": 6607, "ively": 6608, "Ġstructures": 6609, "Ġlabour": 6610, "Ġneighbors": 6611, "Ġtill": 6612, "Ġsoil": 6613, "Ġdropping": 6614, "Ġnominee": 6615, "Ġmeets": 6616, "92": 6617, "rant": 6618, "isa": 6619, "Ġluck": 6620, "aa": 6621, "jet": 6622, "ĠTor": 6623, "ĠCrime": 6624, "Ġlane": 6625, "Ġflu": 6626, "Ġlaunching": 6627, "ĠAutom": 6628, "aks": 6629, "Ġuniversities": 6630, "Ġpollution": 6631, "ĠAdvis": 6632, "ĠMall": 6633, "ls": 6634, "Ġdeeper": 6635, "Ġrepeated": 6636, "Ġmeanwhile": 6637, "Ġchip": 6638, "Ġoutlets": 6639, "Ġliked": 6640, "Ġsal": 6641, "Ġwelfare": 6642, "ago": 6643, "Ġmakers": 6644, "ving": 6645, "fer": 6646, "Ġovercome": 6647, "mb": 6648, "Ġshocked": 6649, "akers": 6650, "Ġnonprofit": 6651, "Ġdonated": 6652, "eral": 6653, "Ġresume": 6654, "Ġlogo": 6655, "Ġsubscription": 6656, "Ġ74": 6657, "ela": 6658, "Ġaspect": 6659, "html": 6660, "Ġsorry": 6661, "Ġupgrade": 6662, "Ġstance": 6663, "Ġfr": 6664, "Ġpapers": 6665, "Ġattacking": 6666, "Ġmeaningful": 6667, "81": 6668, "ĠWeinstein": 6669, "Ġcreates": 6670, "Ġhonour": 6671, "ĠReply": 6672, "oph": 6673, "Ġmarch": 6674, "Ġsmile": 6675, "Ġcomparison": 6676, "will": 6677, "ĠSanchez": 6678, "Ġvoter": 6679, "Ġtheory": 6680, "Ġequally": 6681, "ĠRoger": 6682, "Ġperfectly": 6683, "Ġlanding": 6684, "Ġbillions": 6685, "ĠBloomberg": 6686, "Ġpermit": 6687, "Ġfinals": 6688, "Ġracial": 6689, "Ġpregnancy": 6690, "iled": 6691, "ĠFederation": 6692, "Ġforest": 6693, "Ġtag": 6694, "aul": 6695, "Ġdrinks": 6696, "Ġ(\"": 6697, "ĠMobile": 6698, "Ġtouched": 6699, "Ġclock": 6700, "Ġreg": 6701, "Ġasylum": 6702, "igan": 6703, "Ġsenator": 6704, "Ġ99": 6705, "ĠKumar": 6706, "Ġskill": 6707, "Ġ1998": 6708, "pa": 6709, "ĠAf": 6710, "Ġmood": 6711, "ston": 6712, "Ġhang": 6713, "ĠMPs": 6714, "Please": 6715, "ĠEve": 6716, "Ġdocumentary": 6717, "Ġpersonality": 6718, "ĠCast": 6719, "Ġdiscount": 6720, "bing": 6721, "ĠBoeing": 6722, "Ġdepend": 6723, "Ġcrossing": 6724, "EX": 6725, "Ġsucceed": 6726, "Ġhumanitarian": 6727, "ĠMuhammad": 6728, "Ġwages": 6729, "Ġcolumn": 6730, "Ġexternal": 6731, "Ġstatistics": 6732, "ĠTODAY": 6733, "Ġtrips": 6734, "Ġta": 6735, "Ġpenalties": 6736, "Ġwriters": 6737, "Ġshipping": 6738, "ĠIndians": 6739, "Ġsalt": 6740, "ĠIndustrial": 6741, "ĠYankees": 6742, "ĠDen": 6743, "Ġrough": 6744, "Ġbarrels": 6745, "ĠHor": 6746, "bert": 6747, "ĠDep": 6748, "Ġresign": 6749, "97": 6750, "Ġballs": 6751, "ĠJun": 6752, "ĠBab": 6753, "Ġassociate": 6754, "Ġstring": 6755, "Ġhub": 6756, "Ġorgan": 6757, "ĠMarshall": 6758, "ĠFIFA": 6759, "ĠMun": 6760, "ency": 6761, "research": 6762, "Ġpeers": 6763, "Ġtall": 6764, "ĠGoldman": 6765, "Don": 6766, "Ġparade": 6767, "Ġparks": 6768, "Ġdet": 6769, "Ġdisappointing": 6770, "Ġreflects": 6771, "ĠLakers": 6772, "Ġfiles": 6773, "Ġrelatives": 6774, "ĠUSD": 6775, "ĠArticle": 6776, "Ġcustom": 6777, "ĠCarlos": 6778, "Ġtracking": 6779, "Ġmaintaining": 6780, "ĠCur": 6781, "ardo": 6782, "ĠSkip": 6783, "Ġattitude": 6784, "Just": 6785, "Ġinstitution": 6786, "Ġnarrow": 6787, "Ġsnap": 6788, "Ġenterprise": 6789, "Ġdrives": 6790, "Ġ77": 6791, "Ġcrop": 6792, "Ġvirus": 6793, "Ġcelebrity": 6794, "Ġeconomies": 6795, "ued": 6796, "Ġsum": 6797, "ĠDubai": 6798, "ĠInsurance": 6799, "Ĺ": 6800, "ury": 6801, "ĠUnfortunately": 6802, "Ġclosure": 6803, "ota": 6804, "ĠPhilip": 6805, "oms": 6806, "Ġinvestigated": 6807, "Ġgenerations": 6808, "ĠETF": 6809, "ĠKeith": 6810, "ĠLater": 6811, "isk": 6812, "Ġpreferred": 6813, "Ġdefault": 6814, "Ġtowns": 6815, "ĠRod": 6816, "ĠDie": 6817, "Ġintegrated": 6818, "Ġacquiring": 6819, "Ġvoices": 6820, "Ġser": 6821, "Ġpresents": 6822, "ĠBR": 6823, "ĠEmergency": 6824, "Ġreligion": 6825, "HA": 6826, "Ġresponding": 6827, "ĠThings": 6828, "Ġbeef": 6829, "ĠWithout": 6830, "urd": 6831, "ĠCarl": 6832, "Ġadministrative": 6833, "ĠWhich": 6834, "Ġchallenged": 6835, "Ġcooking": 6836, "ivid": 6837, "ĠFer": 6838, "Ġtremendous": 6839, "ĠTerry": 6840, "iri": 6841, "CS": 6842, "ĠJunior": 6843, "ĠReddit": 6844, "Ġtea": 6845, "Ġaccounting": 6846, "lan": 6847, "Ġdetention": 6848, "Ġreplied": 6849, "SI": 6850, "ĠHel": 6851, "ns": 6852, "ĠProf": 6853, "Ġramp": 6854, "ĠConservative": 6855, "Ġattendance": 6856, "Ġspecialist": 6857, "ĠFinal": 6858, "Ġadvertisement": 6859, "Ġacquire": 6860, "ĠWhatsApp": 6861, "Ġworkforce": 6862, "ĠCalif": 6863, "Ġspeakers": 6864, "ĠEPA": 6865, "Ġconviction": 6866, "hire": 6867, "ĠFisher": 6868, "ĠIntel": 6869, "Ġbin": 6870, "ĠWas": 6871, "Ġearth": 6872, "vi": 6873, "Ġhurricane": 6874, "Ġholidays": 6875, "Ġassume": 6876, "Ġinvolve": 6877, "Ġdynamic": 6878, "ĠGre": 6879, "Ġitem": 6880, "Ġpound": 6881, "Ġanxiety": 6882, "ĠPrint": 6883, "rop": 6884, "Ġautomatically": 6885, "Ġdiscrimination": 6886, "ĠLam": 6887, "ĠColl": 6888, "Ġimpressed": 6889, "Ġinvolves": 6890, "ĠLes": 6891, "ĠTri": 6892, "ĠLook": 6893, "ĠiOS": 6894, "Ġgrab": 6895, "ĠAngel": 6896, "Ġstops": 6897, "ĠPay": 6898, "ĠECB": 6899, "Ġbunch": 6900, "Ġletting": 6901, "ele": 6902, "ĠAdditionally": 6903, "Ġboards": 6904, "NC": 6905, "Ġtragedy": 6906, "Ġpink": 6907, "Ġgonna": 6908, "ones": 6909, "Ġrev": 6910, "ĠIndependent": 6911, "ĠCambridge": 6912, "ĠPence": 6913, "Ġprosecution": 6914, "Ġdeputies": 6915, "ĠAhmed": 6916, "Ġlows": 6917, "ĠAmy": 6918, "ĠBuilding": 6919, "mark": 6920, "Ġsmooth": 6921, "Ġsole": 6922, "Ġwanting": 6923, "ĠHeart": 6924, "Ġobtain": 6925, "ĠBus": 6926, "Ġexchanges": 6927, "friendly": 6928, "Ġlabel": 6929, "elect": 6930, "ĠCompanies": 6931, "owing": 6932, "ĠCB": 6933, "RI": 6934, "ĠMaster": 6935, "Ġliquid": 6936, "ĠDanny": 6937, "Ġproceeds": 6938, "ĠLaura": 6939, "card": 6940, "Ġtears": 6941, "Ġexploration": 6942, "Ġdepression": 6943, "ken": 6944, "ĠFe": 6945, "Ġlending": 6946, "ĠYouth": 6947, "ality": 6948, "NS": 6949, "Ġmoon": 6950, "ĠTaiwan": 6951, "Ġstruggles": 6952, "Ġdiscovery": 6953, "Ġqualify": 6954, "Ġwireless": 6955, "alia": 6956, "Ġwitnessed": 6957, "Ġheight": 6958, "ĠGuy": 6959, "left": 6960, "KE": 6961, "Ġfoul": 6962, "ĠMohammed": 6963, "Ġgrass": 6964, "ĠNon": 6965, "Ġswim": 6966, "Ġbrilliant": 6967, "you": 6968, "ĠFlynn": 6969, "Ġsinging": 6970, "eria": 6971, "UT": 6972, "ĠMcCain": 6973, "ĠSep": 6974, "ĠWars": 6975, "Ġburden": 6976, "Ġpas": 6977, "Ġabandoned": 6978, "Ġint": 6979, "ĠTurner": 6980, "Ġcollective": 6981, "ĠEnvironmental": 6982, "ĠStudents": 6983, "Ġofferings": 6984, "Ġresignation": 6985, "Ġexplosion": 6986, "ĠKoh": 6987, "ager": 6988, "Ġthrows": 6989, "Ġasks": 6990, "light": 6991, "Ġanyway": 6992, "Ġyard": 6993, "Ġcarrier": 6994, "Ġwaves": 6995, "backed": 6996, "TR": 6997, "oud": 6998, "Ġbreach": 6999, "Ġdated": 7000, "Ġdressed": 7001, "ĠDodgers": 7002, "oles": 7003, "Ġ78": 7004, "Ġreads": 7005, "Ġpredict": 7006, "ĠJerusalem": 7007, "ĠPT": 7008, "Ġcrack": 7009, "yan": 7010, "Ġnights": 7011, "eline": 7012, "Ġconvinced": 7013, "Ġlock": 7014, "Ġcarefully": 7015, "ĠMercedes": 7016, "Ġultimate": 7017, "Ġdist": 7018, "Ġslight": 7019, "ĠEdwards": 7020, "Ġswing": 7021, "iling": 7022, "Ġknife": 7023, "ĠNashville": 7024, "IF": 7025, "inder": 7026, "udd": 7027, "Ġsenators": 7028, "ĠFurther": 7029, "ĠXi": 7030, "Ġstr": 7031, "ĠOd": 7032, "days": 7033, "Ġcomm": 7034, "Ġverdict": 7035, "Ġconfirmation": 7036, "king": 7037, "ĠCS": 7038, "Ġadvocates": 7039, "Ġpride": 7040, "Ġmemorial": 7041, "ams": 7042, "erman": 7043, "Ġteenager": 7044, "ĠNeil": 7045, "uts": 7046, "Ġsoul": 7047, "see": 7048, "post": 7049, "Ġchest": 7050, "fire": 7051, "ĠLynch": 7052, "Ġpeaceful": 7053, "OND": 7054, "ĠIndustries": 7055, "ĠJuan": 7056, "Ġrestore": 7057, "Ġreliable": 7058, "ming": 7059, "agan": 7060, "Source": 7061, "ĠCabinet": 7062, "Ġremarkable": 7063, "ĠTrudeau": 7064, "ĠEs": 7065, "Ġintegrity": 7066, "ove": 7067, "fe": 7068, "Ġproceedings": 7069, "Ġconnections": 7070, "Ġunprecedented": 7071, "ĠGlen": 7072, "ux": 7073, "Ġearning": 7074, "Ġingredients": 7075, "Ġnominated": 7076, "ĠBangladesh": 7077, "made": 7078, "Ġlessons": 7079, "Ġbreakfast": 7080, "ĠRelations": 7081, "Ġloose": 7082, "Al": 7083, "Ġupgraded": 7084, "ral": 7085, "ĠPage": 7086, "oto": 7087, "ĠQueensland": 7088, "Ġprocedure": 7089, "ĠSmall": 7090, "Ġrespective": 7091, "Ġpictured": 7092, "ĠBas": 7093, "Ġpreparation": 7094, "ĠMyanmar": 7095, "Ġdonation": 7096, "Ġvisible": 7097, "iest": 7098, "ĠBroadway": 7099, "rick": 7100, "ĠSchools": 7101, "Ġarrests": 7102, "ĠJessica": 7103, "ĠBengal": 7104, "Ġhell": 7105, "Ġannouncing": 7106, "Ġmail": 7107, "ĠMcG": 7108, "two": 7109, "rest": 7110, "OD": 7111, "ĠBradley": 7112, "Ġdoubled": 7113, "Ġpledged": 7114, "Ġcomeback": 7115, "Ġextraordinary": 7116, "Ġslide": 7117, "Ġassess": 7118, "Ġagricultural": 7119, "ĠKay": 7120, "Ġvendors": 7121, "Ġnarrative": 7122, "Ġreviewed": 7123, "ĠPass": 7124, "Ġinspiration": 7125, "ĠHunter": 7126, "Ġcalendar": 7127, "ĠDiamond": 7128, "Ġremoval": 7129, "ners": 7130, "ĠKap": 7131, "Ġconsent": 7132, "Ġvisual": 7133, "Ġcheese": 7134, "ĠTher": 7135, "ĠFR": 7136, "ĠShanghai": 7137, "iah": 7138, "ĠCole": 7139, "AK": 7140, "Ġranking": 7141, "Ġcook": 7142, "Ġhalftime": 7143, "ĠStars": 7144, "Ġroutes": 7145, "aim": 7146, "Ġestablishment": 7147, "ĠMug": 7148, "Ġsurvivors": 7149, "urg": 7150, "ĠBrett": 7151, "Ġunexpected": 7152, "ained": 7153, "Ġrarely": 7154, "ĠGall": 7155, "Ġadvocate": 7156, "ĠNad": 7157, "Ġ911": 7158, "Ġracist": 7159, "erer": 7160, "ĠRev": 7161, "ĠSection": 7162, "Ġhelpful": 7163, "CT": 7164, "agg": 7165, "Ġgovernance": 7166, "Ġfelony": 7167, "Ġoptimistic": 7168, "Ġelectoral": 7169, "EG": 7170, "town": 7171, "Ġdaughters": 7172, "Ġanswered": 7173, "Ġthin": 7174, "ĠClassic": 7175, "Ġshareholder": 7176, "ĠBlake": 7177, "ĠFla": 7178, "Ġparliamentary": 7179, "dy": 7180, "Ġcommented": 7181, "Ġtri": 7182, "Ġglobe": 7183, "Ġmandate": 7184, "Ġslipped": 7185, "ĠTower": 7186, "Ġoperated": 7187, "gers": 7188, "Ġassured": 7189, "ĠMartinez": 7190, "Ġdesigns": 7191, "ĠModel": 7192, "Ġstakeholders": 7193, "Ġdefended": 7194, "Ġseniors": 7195, "Ġvacation": 7196, "Ġglobally": 7197, "ump": 7198, "Not": 7199, "Ġclip": 7200, "Ġarticles": 7201, "BR": 7202, "km": 7203, "ĠFront": 7204, "PL": 7205, "Ġadoption": 7206, "Ġsudden": 7207, "Ġframework": 7208, "Ġhanging": 7209, "gl": 7210, "ĠSel": 7211, "Ġmoderate": 7212, "Ġreverse": 7213, "income": 7214, "cor": 7215, "ĠGB": 7216, "Ġphysically": 7217, "Ġtransparency": 7218, "ĠElectric": 7219, "Ġrefugee": 7220, "profile": 7221, "iva": 7222, "ately": 7223, "ĠAC": 7224, "Ġtransferred": 7225, "Ġaffair": 7226, "ĠAlaska": 7227, "oria": 7228, "ĠChange": 7229, "Ġrepeat": 7230, "Ġscreening": 7231, "ender": 7232, "ĠCas": 7233, "ĠDav": 7234, "Ġfocuses": 7235, "Ġcommissioner": 7236, "Ġupside": 7237, "ĠKeep": 7238, "ĠBlues": 7239, "ently": 7240, "Ġaut": 7241, "Ġexperiencing": 7242, "aman": 7243, "Ġapprove": 7244, "Ġmile": 7245, "Ġcheaper": 7246, "ĠWind": 7247, "ĠStore": 7248, "Ġgrabbed": 7249, "Ġsons": 7250, "Ġfighter": 7251, "Ġum": 7252, "ĠBased": 7253, "don": 7254, "Ġconstitution": 7255, "finals": 7256, "act": 7257, "¢": 7258, "Ġmill": 7259, "Ġorganisations": 7260, "ĠToyota": 7261, "Ġyuan": 7262, "Ġterrorists": 7263, "Ġforth": 7264, "Ġavailability": 7265, "Ġentrance": 7266, "Ġvolumes": 7267, "Ġmult": 7268, "plus": 7269, "ĠColumbus": 7270, "ĠSummit": 7271, "Ġbabies": 7272, "ĠMur": 7273, "ĠGray": 7274, "ĠChar": 7275, "ĠButler": 7276, "Ġpose": 7277, "ĠNatural": 7278, "ĠAtt": 7279, "Ġdecrease": 7280, "Ġtens": 7281, "kt": 7282, "Ġminds": 7283, "Ġimpacted": 7284, "Ġchapter": 7285, "ĠOp": 7286, "ĠHarrison": 7287, "ĠRodriguez": 7288, "Ġethnic": 7289, "Ġtravelling": 7290, "ĠBond": 7291, "ader": 7292, "core": 7293, "Ġgallery": 7294, "founder": 7295, "ĠVill": 7296, "Ġdecent": 7297, "ĠHistory": 7298, "ĠInt": 7299, "ĠNa": 7300, "ĠHad": 7301, "Ġmainstream": 7302, "ĠTs": 7303, "Ġbottle": 7304, "sen": 7305, "Ġrecession": 7306, "Ġsophomore": 7307, "Ġsilence": 7308, "cc": 7309, "Ġqualifying": 7310, "Ġcomplained": 7311, "ĠRad": 7312, "Ġactively": 7313, "Ġbacks": 7314, "ĠMusk": 7315, "Ġcareful": 7316, "Ġmeals": 7317, "ĠDor": 7318, "Ġmess": 7319, "ĠBelgium": 7320, "Ġke": 7321, "ĠLopez": 7322, "Ġbow": 7323, "Ġhelicopter": 7324, "was": 7325, "Ġstone": 7326, "kins": 7327, "Ġunlike": 7328, "Ġcollision": 7329, "ĠAlt": 7330, "HP": 7331, "ĠMason": 7332, "has": 7333, "Ġclimbed": 7334, "Ġindication": 7335, "Ġhotels": 7336, "Ġloud": 7337, "ĠMilan": 7338, "kes": 7339, "Ġbadly": 7340, "Ġtrials": 7341, "Ġimpacts": 7342, "ĠJane": 7343, "Ġcrossed": 7344, "Ġdiscussing": 7345, "ĠSM": 7346, "Ġpopularity": 7347, "ĠWant": 7348, "fall": 7349, "Ġartificial": 7350, "ĠBu": 7351, "akh": 7352, "Ġdominant": 7353, "gov": 7354, "Ġpremier": 7355, "Ġexecution": 7356, "gate": 7357, "Ġswimming": 7358, "Ġchat": 7359, "Ġdevastating": 7360, "acking": 7361, "Ġreception": 7362, "urt": 7363, "Ġtheater": 7364, "Ġgather": 7365, "Ġtear": 7366, "uro": 7367, "Ġdemocratic": 7368, "Ġrebels": 7369, "Ġlifetime": 7370, "Ġradical": 7371, "uan": 7372, "Ġtechniques": 7373, "ache": 7374, "ior": 7375, "Ġcamps": 7376, "Ġtelephone": 7377, "ĠDublin": 7378, "ĠBrand": 7379, "ĠMarcus": 7380, "aun": 7381, "ĠRec": 7382, "Ġ82": 7383, "ban": 7384, "Ġsafely": 7385, "aku": 7386, "aki": 7387, "Ġbankruptcy": 7388, "FF": 7389, "Ġformat": 7390, "Ġattached": 7391, "ĠFame": 7392, "ĠEdward": 7393, "Ġmerger": 7394, "ĠRepresentatives": 7395, "izes": 7396, "Ġhidden": 7397, "Ġval": 7398, "zz": 7399, "Ġexcess": 7400, "Ġscope": 7401, "Ġdivorce": 7402, "Ġburn": 7403, "Ġrequirement": 7404, "BB": 7405, "ĠHand": 7406, "Ġcons": 7407, "Ġrisen": 7408, "Ġtwitter": 7409, "Ġoffseason": 7410, "ĠSometimes": 7411, "ĠInf": 7412, "ĠAng": 7413, "uer": 7414, "report": 7415, "Ġdreams": 7416, "Ġ700": 7417, "ips": 7418, "ĠDream": 7419, "Ġgifts": 7420, "Ġsomehow": 7421, "ĠTur": 7422, "ĠRachel": 7423, "can": 7424, "Ġlog": 7425, "ĠMedicaid": 7426, "Ġles": 7427, "Ġtired": 7428, "ĠArkansas": 7429, "Ġliquidity": 7430, "ĠPhillips": 7431, "ĠBTC": 7432, "Ġhide": 7433, "Ġpun": 7434, "ĠRun": 7435, "lyn": 7436, "ĠUC": 7437, "ĠDesign": 7438, "ĠDev": 7439, "Ġvaluation": 7440, "Ġreveals": 7441, "ĠChild": 7442, "other": 7443, "Ġposed": 7444, "lee": 7445, "Ġships": 7446, "ĠTrue": 7447, "Ġdescribes": 7448, "Ġrunner": 7449, "bro": 7450, "Ġankle": 7451, "Ġod": 7452, "ĠAnnual": 7453, "CL": 7454, "Ġoverhaul": 7455, "ned": 7456, "Ġbold": 7457, "Ġmo": 7458, "ĠFalls": 7459, "Ġemployed": 7460, "ĠGro": 7461, "Ġflash": 7462, "ĠTD": 7463, "Ġnervous": 7464, "Ġintegration": 7465, "Ġsmartphones": 7466, "Ġmovements": 7467, "nie": 7468, "ition": 7469, "ĠThird": 7470, "Ģ": 7471, "Ġmetres": 7472, "Ġeconomist": 7473, "omp": 7474, "Ġteens": 7475, "Ġeveryday": 7476, "Ġinterviewed": 7477, "Ġbriefly": 7478, "],": 7479, "uke": 7480, "ĠFOX": 7481, "Ġunderlying": 7482, "ĠLuc": 7483, "Ġcourses": 7484, "ss": 7485, "amed": 7486, "°": 7487, "ju": 7488, "ĠBanks": 7489, "Ġoutfit": 7490, "illing": 7491, "Ġtrafficking": 7492, "Ġurging": 7493, "Ġbelt": 7494, "Ġrid": 7495, "CP": 7496, "Ġelderly": 7497, "ĠGrowth": 7498, "Ã¡n": 7499, "ĠSn": 7500, "Ġsurrounded": 7501, "Ġsisters": 7502, "ĠIslam": 7503, "Ġsynd": 7504, "ĠCosta": 7505, "di": 7506, "ĠKl": 7507, "Ġmanufacturer": 7508, "holders": 7509, "Ġelement": 7510, "Ġload": 7511, "Ġbooked": 7512, "Ġaccompanied": 7513, "ĠChamber": 7514, "Ġbriefing": 7515, "Oh": 7516, "imi": 7517, "ĠDefence": 7518, "ĠCurrently": 7519, "aking": 7520, "Ġhandled": 7521, "ĠCD": 7522, "ĠBenjamin": 7523, "Ġpocket": 7524, "ĠKashmir": 7525, "Ġlighting": 7526, "aps": 7527, "Ġ1997": 7528, "ech": 7529, "Ġaddiction": 7530, "Ġbases": 7531, "Ġpriorities": 7532, "Ġhardly": 7533, "ĠQuebec": 7534, "ĠEarn": 7535, "IES": 7536, "ĠZach": 7537, "ĠAlong": 7538, "MI": 7539, "Ġins": 7540, "ĠRogers": 7541, "ĠKan": 7542, "ĠFuture": 7543, "Ġtriggered": 7544, "ĠUnit": 7545, "Ġweighed": 7546, "Ġpointing": 7547, "Ġchocolate": 7548, "ĠBrowns": 7549, "ĠISIS": 7550, "Ġgoalkeeper": 7551, "Ġsaves": 7552, "ĠAndre": 7553, "burn": 7554, "ĠCont": 7555, "ĠNetherlands": 7556, "Ġpolitically": 7557, "ĠAshley": 7558, "ĠWhit": 7559, "aded": 7560, "PH": 7561, "Ġborders": 7562, "ORE": 7563, "Ġally": 7564, "Trump": 7565, "istan": 7566, "ĠHunt": 7567, "ĠCancer": 7568, "ĠGrace": 7569, "ĠTottenham": 7570, "Ġ1960": 7571, "ĠMarg": 7572, "ĠBryan": 7573, "ĠAgain": 7574, "acing": 7575, "Ġarguments": 7576, "ĠSouthwest": 7577, "Ġvocal": 7578, "Ġjudgment": 7579, "Ġengaging": 7580, "Ġadopt": 7581, "Ġrental": 7582, "Ġlinebacker": 7583, "ĠKardashian": 7584, "Ġepisodes": 7585, "..": 7586, "Ġunt": 7587, "Ġvowed": 7588, "Ġ79": 7589, "ule": 7590, "Ġtransit": 7591, "Ġoffshore": 7592, "Ġsuppliers": 7593, "Ġarguing": 7594, "Ġsatellite": 7595, "ĠLind": 7596, "ĠTaliban": 7597, "Buy": 7598, "ĠCaribbean": 7599, "ĠBarry": 7600, "Ġauthors": 7601, "ĠWolf": 7602, "Ġviewing": 7603, "ĠCubs": 7604, "From": 7605, "Ġ%": 7606, "Ġcurrencies": 7607, "Why": 7608, "ĠBroncos": 7609, "Ġtrick": 7610, "Ġdiesel": 7611, "ĠLiberal": 7612, "FL": 7613, "Ġtopics": 7614, "Ġretain": 7615, "ĠLiberty": 7616, "Ġacquisitions": 7617, "ced": 7618, "Ġfre": 7619, "Ġfleet": 7620, "Ġcopper": 7621, "ĠPot": 7622, "jen": 7623, "ĠElliott": 7624, "ĠPyongyang": 7625, "Ġobject": 7626, "ĠUse": 7627, "Ġmutual": 7628, "MP": 7629, "Ġev": 7630, "Ġdeny": 7631, "ĠEveryone": 7632, "lling": 7633, "Ġpays": 7634, "Ġdrought": 7635, "Ġcorn": 7636, "Ġworkplace": 7637, "rig": 7638, "ĠMn": 7639, "Ġadvisory": 7640, "ĠCat": 7641, "Ġchronic": 7642, "ĠSteelers": 7643, "Ġboxes": 7644, "ĠNap": 7645, "Ġdemonstrated": 7646, "ĠTournament": 7647, "Ġsymbol": 7648, "ĠAfghan": 7649, "ĠTan": 7650, "ired": 7651, "ĠEv": 7652, "ĠConsumer": 7653, "Ġmoral": 7654, "ĠAdditional": 7655, "Ġwebsites": 7656, "Ġoccasions": 7657, "Ġfate": 7658, "Ġpitcher": 7659, "Ġtaxpayers": 7660, "Ġdeemed": 7661, "ĠLibya": 7662, "Ġpriced": 7663, "Ġdistributed": 7664, "ĠForum": 7665, "Ġrice": 7666, "Ġbloc": 7667, "Ġprovisions": 7668, "agh": 7669, "Ġpen": 7670, "Ġattracted": 7671, "ĠEdmonton": 7672, "Ġthousand": 7673, "Ġpainting": 7674, "Ġil": 7675, "Ġcourtesy": 7676, "Ġeliminate": 7677, "Ġacc": 7678, "Ġmeters": 7679, "Ġreflected": 7680, "Ġcomponent": 7681, "Every": 7682, "Ġsells": 7683, "Ġfault": 7684, "Ġburned": 7685, "ĠKirk": 7686, "ĠAnna": 7687, "Ġappeals": 7688, "Ġeggs": 7689, "Ġfrequent": 7690, "Ġtrigger": 7691, "Ġrevised": 7692, "ĠAngela": 7693, "Ġ81": 7694, "Ġsingles": 7695, "Ġviral": 7696, "Ġworries": 7697, "ĠShould": 7698, "profit": 7699, "Ġraises": 7700, "ĠBryant": 7701, "ĠProduct": 7702, "Ġtenure": 7703, "Ġdiabetes": 7704, "Ġcolour": 7705, "azz": 7706, "ĠGirls": 7707, "Ġpractical": 7708, "Ġblind": 7709, "ancing": 7710, "pictured": 7711, "Ġfinale": 7712, "ĠElection": 7713, "Ġathletic": 7714, "Ġpromoted": 7715, "Ġflowers": 7716, "Ġtrains": 7717, "ario": 7718, "Ġsufficient": 7719, "IE": 7720, "Ġexamples": 7721, "Ġshed": 7722, "Ġbirds": 7723, "Ġchaos": 7724, "Ġwound": 7725, "Ġrocket": 7726, "Ġwet": 7727, "Ġsample": 7728, "ĠNag": 7729, "ĠOliver": 7730, "Ġscrutiny": 7731, "ĠSeven": 7732, "ĠRoman": 7733, "ĠFred": 7734, "Ġweird": 7735, "ĠTam": 7736, "ĠSupport": 7737, "ĠNathan": 7738, "Ġstudying": 7739, "Ġintroduction": 7740, "Ġtons": 7741, "cer": 7742, "aus": 7743, "ION": 7744, "Ġcritic": 7745, "ĠAh": 7746, "alo": 7747, "pur": 7748, "Ġstorms": 7749, "ĠMission": 7750, "Ġcredits": 7751, "Ġgrants": 7752, "Ġcomp": 7753, "Ġhearts": 7754, "part": 7755, "Ġpin": 7756, "Ġsubsequent": 7757, "Ġmad": 7758, "ĠSacramento": 7759, "woman": 7760, "from": 7761, "Ġoutcomes": 7762, "Ġoldest": 7763, "Ġdesperate": 7764, "ĠTal": 7765, "ĠDJ": 7766, "ward": 7767, "Ġaudiences": 7768, "Ġimportantly": 7769, "ĠEmily": 7770, "sk": 7771, "ĠHeat": 7772, "ĠType": 7773, "ĠPeace": 7774, "Ġsuspicious": 7775, "aly": 7776, "ĠGET": 7777, "ĠCAP": 7778, "dis": 7779, "ĠIraqi": 7780, "ĠReed": 7781, "Ġstrange": 7782, "ĠParent": 7783, "900": 7784, "Ġglad": 7785, "ĠTroy": 7786, "ĠShort": 7787, "Ġheritage": 7788, "Ġarriving": 7789, "ingly": 7790, "Ġtransformation": 7791, "Ġlease": 7792, "Ġcollapsed": 7793, "cha": 7794, "ĠPatrol": 7795, "Ġcomputers": 7796, "Ġprinciples": 7797, "Ġsporting": 7798, "ĠHughes": 7799, "mile": 7800, "ĠCit": 7801, "Ġdrilling": 7802, "ĠBox": 7803, "ÃŁ": 7804, "bre": 7805, "ĠOverall": 7806, "Ġopioid": 7807, "Ġdelighted": 7808, "Ġhonored": 7809, "ĠCold": 7810, "Ġunions": 7811, "ĠCou": 7812, "ĠCircuit": 7813, "Ġblast": 7814, "sson": 7815, "ĠHernandez": 7816, "ĠLooking": 7817, "Ġlegally": 7818, "ĠWalmart": 7819, "bridge": 7820, "Ġmat": 7821, "rad": 7822, "ids": 7823, "Ġdining": 7824, "Ġrebound": 7825, "abad": 7826, "ĠRom": 7827, "Ġimpose": 7828, "ĠAlpha": 7829, "ĠWeekly": 7830, "TER": 7831, "ĠJam": 7832, "Ġabsolute": 7833, "Ġinventory": 7834, "ĠBilly": 7835, "ĠKaren": 7836, "ĠFriends": 7837, "ĠCent": 7838, "ĠVikings": 7839, "ĠMuch": 7840, "cell": 7841, "ads": 7842, "Ġph": 7843, "Ġkiller": 7844, "ĠMembers": 7845, "Ġshooter": 7846, "ĠInvestigators": 7847, "ĠJoshua": 7848, "Ġparticipated": 7849, "Ġinnocent": 7850, "ĠRichmond": 7851, "itor": 7852, "ĠDal": 7853, "ĠOperator": 7854, "Ġmakeup": 7855, "Ġconf": 7856, "ĠNEWS": 7857, "ĠDef": 7858, "Ġchase": 7859, "ĠCost": 7860, "mont": 7861, "\":": 7862, "Ġarrangements": 7863, "stein": 7864, "Ġretire": 7865, "ĠLuis": 7866, "Ġrenewed": 7867, "ĠTownship": 7868, "Ġchecked": 7869, "arts": 7870, "ĠCash": 7871, "Ġcentres": 7872, "chers": 7873, "ĠSolutions": 7874, "Ġlegend": 7875, "ige": 7876, "most": 7877, "osed": 7878, "ĠPor": 7879, "Ġpremiere": 7880, "FS": 7881, "Ġmissiles": 7882, "ĠLang": 7883, "Ġsing": 7884, "best": 7885, "Ġtail": 7886, "Ġriders": 7887, "Picture": 7888, "zen": 7889, "ĠKent": 7890, "Ġtransform": 7891, "Ġwildlife": 7892, "Ġsmoking": 7893, "Ġpreseason": 7894, "ĠLucas": 7895, "ĠAnne": 7896, "owski": 7897, "Ġtape": 7898, "Ġdisplayed": 7899, "Ġforum": 7900, "Ġanonymity": 7901, "ĠIndianapolis": 7902, "hips": 7903, "acc": 7904, "ĠMoreover": 7905, "lers": 7906, "area": 7907, "ĠIndeed": 7908, "Ġconducting": 7909, "Ġinfection": 7910, "Ġdealt": 7911, "OB": 7912, "asing": 7913, "ĠGaza": 7914, "itter": 7915, "ĠKa": 7916, "Ġhopeful": 7917, "ĠSnow": 7918, "Ġentitled": 7919, "Ġaffecting": 7920, "Ġeager": 7921, "Ġcircle": 7922, "Ġlaugh": 7923, "ĠProsecutors": 7924, "ĠDur": 7925, "Ġbarriers": 7926, "ĠPoll": 7927, "oun": 7928, "ĠPalm": 7929, "chi": 7930, "Ġsamples": 7931, "Ġcompromise": 7932, "atter": 7933, "Ġenormous": 7934, "ĠÃ©": 7935, "coming": 7936, "ĠPharmaceutical": 7937, "Ġrank": 7938, "Let": 7939, "Ġtransgender": 7940, "ĠCloud": 7941, "FO": 7942, "ĠBor": 7943, "Ġbonus": 7944, "Ġordinary": 7945, "ĠPres": 7946, "ĠHIV": 7947, "ires": 7948, "OSE": 7949, "Ġdancing": 7950, "ĠHD": 7951, "Ġversions": 7952, "Ġ88": 7953, "rate": 7954, "Ġtackles": 7955, "Ġknock": 7956, "ĠEmma": 7957, "Ġmotivated": 7958, "ĠBennett": 7959, "ĠBurn": 7960, "Ġgrid": 7961, "Ġembrace": 7962, "ĠSpurs": 7963, "Ġflows": 7964, "ĠGer": 7965, "Ġsponsored": 7966, "Ġsurvival": 7967, "ching": 7968, "Ġ1995": 7969, "Ġreward": 7970, "Ġdepends": 7971, "Ġpostseason": 7972, "Ġloaded": 7973, "Ġneutral": 7974, "ĠPop": 7975, "BL": 7976, "Ġrevolution": 7977, "ĠFreedom": 7978, "Ġrecovering": 7979, "Ġrequiring": 7980, "ALL": 7981, "ARE": 7982, "Ġmini": 7983, "lt": 7984, "ĠFDA": 7985, "Ġcarpet": 7986, "ĠPrior": 7987, "Ġadmission": 7988, "ĠEver": 7989, "ĠTribune": 7990, "ĠRonaldo": 7991, "Ġthick": 7992, "Ġlanes": 7993, "Ġ84": 7994, "ĠMemphis": 7995, "Ġopt": 7996, "BO": 7997, "Ġfaculty": 7998, "ĠChad": 7999, "ĠSUV": 8000, "ĠHen": 8001, "Ġeste": 8002, "ĠHu": 8003, "ĠAgriculture": 8004, "store": 8005, "ĠDrug": 8006, "inter": 8007, "Ġ1996": 8008, "ident": 8009, "Ġbackup": 8010, "ĠHonda": 8011, "ĠHope": 8012, "oes": 8013, "ums": 8014, "amer": 8015, "Ġbreath": 8016, "Ġ110": 8017, "Ġjoke": 8018, "ĠAld": 8019, "Ġwondering": 8020, "ĠAssad": 8021, "ĠRem": 8022, "Ġfundraising": 8023, "pot": 8024, "Ã¨": 8025, "Ġquestioning": 8026, "Ġpent": 8027, "ĠMoney": 8028, "ĠMedicine": 8029, "wick": 8030, "ĠKnights": 8031, "Ġbatting": 8032, "ĠMos": 8033, "Ġdesignated": 8034, "isse": 8035, "Ġspotlight": 8036, "Ġlake": 8037, "Ġcaution": 8038, "Ġinmates": 8039, "Ġlap": 8040, "CE": 8041, "ĠJavascript": 8042, "ĠDeutsche": 8043, "ĠFargo": 8044, "Ġguaranteed": 8045, "borough": 8046, "Ġfunctions": 8047, "ĠElementary": 8048, "ĠChuck": 8049, "Ġpitched": 8050, "ĠKrist": 8051, "Ġsteal": 8052, "Ġchips": 8053, "Ġalarm": 8054, "Ġbeloved": 8055, "scale": 8056, "Ġassaulted": 8057, "ĠPentagon": 8058, "Ġtemporarily": 8059, "Ġ93": 8060, "Ġ>": 8061, "ĠPortugal": 8062, "ti": 8063, "HL": 8064, "Ġdecreased": 8065, "Ġexistence": 8066, "Ġisolated": 8067, "Ġdeposit": 8068, "Ġstudied": 8069, "\")": 8070, "Ġtrophy": 8071, "ĠBrooks": 8072, "Ġbattling": 8073, "Ġweaker": 8074, "ĠPrivate": 8075, "ĠAccess": 8076, "Ġvirtually": 8077, "Ġshortage": 8078, "Ġgaining": 8079, "Ġbathroom": 8080, "TON": 8081, "Ġconcerning": 8082, "Ġengineer": 8083, "Ġbread": 8084, "Ġdemonstrate": 8085, "ĠDh": 8086, "Ġhorses": 8087, "Ġintersection": 8088, "Ġcolors": 8089, "Ġdelegation": 8090, "Ġnotable": 8091, "Ġwithdrawal": 8092, "ĠDennis": 8093, "Ġlocally": 8094, "Ġcoastal": 8095, "Ġcomply": 8096, "ĠMoh": 8097, "ĠAlbert": 8098, "Ġclosest": 8099, "ĠCITY": 8100, "Ġ83": 8101, "Ġcancelled": 8102, "ĠðŁ": 8103, "Ġsharply": 8104, "RS": 8105, "Ġproductivity": 8106, "Ġbasket": 8107, "SS": 8108, "Ġadmit": 8109, "ool": 8110, "ination": 8111, "ĠBB": 8112, "Ġsur": 8113, "ĠSteel": 8114, "ĠTed": 8115, "ĠPac": 8116, "Ġpatterns": 8117, "Ġlisting": 8118, "Ġreplacing": 8119, "ĠPradesh": 8120, "Ġroots": 8121, "Ġbroker": 8122, "ĠWriting": 8123, "Ġsued": 8124, "Ġorganised": 8125, "ĠThanksgiving": 8126, "ĠNOT": 8127, "Ġjournalism": 8128, "uel": 8129, "Ġkilometers": 8130, "Ġhunt": 8131, "berry": 8132, "ĠMother": 8133, "Ġlegitimate": 8134, "Ġinput": 8135, "ĠRel": 8136, "ĠGuardian": 8137, "Ar": 8138, "Ġtransported": 8139, "Ġbedroom": 8140, "ashing": 8141, "Ġbats": 8142, "Ġcleaning": 8143, "Ġwrapped": 8144, "Pacific": 8145, "Ġfence": 8146, "Ġtestified": 8147, "Ġ1994": 8148, "Ġinterference": 8149, "Ġmatching": 8150, "Ġexpression": 8151, "eta": 8152, "ĠSpencer": 8153, "Ġstrategist": 8154, "who": 8155, "Ġvictories": 8156, "Ġ2022": 8157, "Ġstakes": 8158, "Ġbuses": 8159, "ĠHousing": 8160, "Ġeditorial": 8161, "Ġ86": 8162, "ĠBishop": 8163, "Ġfrustrated": 8164, "Ġappearing": 8165, "http": 8166, "IGHT": 8167, "Ġmemo": 8168, "Ġinsiders": 8169, "Even": 8170, "Ġclassroom": 8171, "Ġchef": 8172, "aining": 8173, "].": 8174, "ĠMcD": 8175, "Ġ87": 8176, "ĠPunjab": 8177, "Ġancient": 8178, "Ġresolved": 8179, "Ġdying": 8180, "Ġdestruction": 8181, "Ġgoverning": 8182, "Ġrestructuring": 8183, "ĠPick": 8184, "Ġmunicipal": 8185, "Ġengines": 8186, "ĠHudson": 8187, "Æ": 8188, "Ġrepeal": 8189, "standing": 8190, "Ġbound": 8191, "ĠOS": 8192, "ĠCommonwealth": 8193, "Ġdescription": 8194, "Ġhouseholds": 8195, "Ġmal": 8196, "Ġstopping": 8197, "equ": 8198, "Ġregulator": 8199, "Ġcontaining": 8200, "Ġremoving": 8201, "Ġwithdraw": 8202, "Ġburied": 8203, "Ġlists": 8204, "ĠGil": 8205, "Ġlowered": 8206, "Ġformally": 8207, "ĠRound": 8208, "asi": 8209, "¥": 8210, "lett": 8211, "Ġprogressive": 8212, "ĠFalcons": 8213, "ĠRaw": 8214, "gun": 8215, "Ġcontributing": 8216, "Ġhunting": 8217, "Ġvalid": 8218, "Ġexception": 8219, "ĠPlayers": 8220, "ĠTra": 8221, "Ġracism": 8222, "hing": 8223, "chen": 8224, "Ġdifferently": 8225, "Ġchampionships": 8226, "ĠEng": 8227, "ĠNO": 8228, "ĠAuto": 8229, "ĠErdogan": 8230, "iding": 8231, "Ġwarming": 8232, "Ġcivilian": 8233, "ĠDam": 8234, "Ġfantasy": 8235, "ĠNav": 8236, "itions": 8237, "ĠDrew": 8238, "ĠNancy": 8239, "Ġtrapped": 8240, "ĠRussians": 8241, "ĠIC": 8242, "Ġflexibility": 8243, "ular": 8244, "Ġviolated": 8245, "ipped": 8246, "Ġgarage": 8247, "ĠDeep": 8248, "Ġpraise": 8249, "ĠLab": 8250, "ĠPlayer": 8251, "Ġjudicial": 8252, "Ġdonate": 8253, "Ġseparated": 8254, "Ġreleases": 8255, "nik": 8256, "Ġexplanation": 8257, "aph": 8258, "Ġloyal": 8259, "Ġstrongest": 8260, "ĠShar": 8261, "Ġrescued": 8262, "Ġambitious": 8263, "Ġclimb": 8264, "Ġscared": 8265, "Ġignored": 8266, "cut": 8267, "Ġstole": 8268, "Ġweakness": 8269, "ĠRidge": 8270, "oa": 8271, "LA": 8272, "Ġdep": 8273, "ĠPowell": 8274, "Do": 8275, "Ġprotein": 8276, "Ġreiterated": 8277, "ĠCox": 8278, "aling": 8279, "ĠUnlike": 8280, "ĠKane": 8281, "ĠMcConnell": 8282, "Ġshowcase": 8283, "Ġuniform": 8284, "ower": 8285, "Ġdiscover": 8286, "stop": 8287, "ipper": 8288, "Ġtreatments": 8289, "Ġgrocery": 8290, "Ġsubscribers": 8291, "lock": 8292, "ple": 8293, "Ġflew": 8294, "ania": 8295, "Ġstepping": 8296, "ĠSoviet": 8297, "Ġconsultant": 8298, "ags": 8299, "ĠLim": 8300, "Ġ91": 8301, "ĠCode": 8302, "ports": 8303, "box": 8304, "Ġlakh": 8305, "Ġreminder": 8306, "ym": 8307, "ĠTravis": 8308, "Ġpure": 8309, "now": 8310, "ĠVR": 8311, "Ġachievement": 8312, "ĠEmirates": 8313, "ĠThunder": 8314, "Ġmerely": 8315, "ĠCa": 8316, "ĠAverage": 8317, "ĠDa": 8318, "Ġtopped": 8319, "ĠCurry": 8320, "Ġchemicals": 8321, "Ġamendment": 8322, "ĠBorder": 8323, "ĠBat": 8324, "Ġ130": 8325, "Ġprogramming": 8326, "Ġtele": 8327, "ĠKarl": 8328, "Ġaveraged": 8329, "ĠSpe": 8330, "world": 8331, "PG": 8332, "Ġfights": 8333, "ĠPrincess": 8334, "ĠCIA": 8335, "ĠAbe": 8336, "Ġacted": 8337, "only": 8338, "Ġinsight": 8339, "Ġathlete": 8340, "ĠTar": 8341, "commerce": 8342, "Ġaveraging": 8343, "cr": 8344, "ĠPalestinians": 8345, "Well": 8346, "Ġbull": 8347, "Ġchoosing": 8348, "Ġsurely": 8349, "ĠSecret": 8350, "Ġteammate": 8351, "ĠAmendment": 8352, "ĠBirmingham": 8353, "Ġexcitement": 8354, "strong": 8355, "ĠSin": 8356, "Ġdamages": 8357, "rated": 8358, "Ġrankings": 8359, "Ġconservation": 8360, "home": 8361, "erm": 8362, "ield": 8363, "Ġdisorder": 8364, "acher": 8365, "Ġnaturally": 8366, "atur": 8367, "Ġpackages": 8368, "Ġapproaches": 8369, "icks": 8370, "ourn": 8371, "Ġodd": 8372, "Ġshore": 8373, "ĠBeing": 8374, "Ġmagic": 8375, "Ġtourist": 8376, "largest": 8377, "Ġwhenever": 8378, "Ġlenders": 8379, "Ġegg": 8380, "ĠChair": 8381, "Ġlets": 8382, "Ġwarnings": 8383, "į": 8384, "Ġpol": 8385, "Ġdrag": 8386, "ĠAmb": 8387, "ĠCle": 8388, "ĠLouisville": 8389, "ĠShaw": 8390, "lands": 8391, "Ġanthem": 8392, "ĠTrail": 8393, "Ġaccepting": 8394, "anger": 8395, "good": 8396, "ĠBroad": 8397, "ĠLebanon": 8398, "ĠMillion": 8399, "ĠHenderson": 8400, "Ġwh": 8401, "Ġdust": 8402, "Ġ92": 8403, "ĠMend": 8404, "Ġchecking": 8405, "ĠCow": 8406, "sized": 8407, "Ġautomatic": 8408, "Ġcelebrates": 8409, "Ġarena": 8410, "Ġfinger": 8411, "ĠHarvard": 8412, "Ġfrustration": 8413, "Ġstrict": 8414, "Ġpreserve": 8415, "Ġsleeping": 8416, "Ġconverted": 8417, "Ġinsights": 8418, "Ġtra": 8419, "Ġjailed": 8420, "Ġchamber": 8421, "Ġtoxic": 8422, "ading": 8423, "ĠTriple": 8424, "grade": 8425, "ĠRest": 8426, "ĠHoly": 8427, "oper": 8428, "Ġdesk": 8429, "Ġmatchup": 8430, "Ġsteep": 8431, "ĠGot": 8432, "lay": 8433, "ĠCab": 8434, "aked": 8435, "ĠFoster": 8436, "Ġrunners": 8437, "ĠNA": 8438, "Ġdestroy": 8439, "Ġsupportive": 8440, "ĠRacing": 8441, "Ġtrademark": 8442, "Ġjacket": 8443, "Ġhorror": 8444, "ĠAle": 8445, "Ġass": 8446, "Ġsch": 8447, "abb": 8448, "Ġplanes": 8449, "Ġimpression": 8450, "ĠEarly": 8451, "ĠPompe": 8452, "Ġking": 8453, "Ġsilent": 8454, "ĠCuba": 8455, "Ġmedication": 8456, "ences": 8457, "list": 8458, "ailing": 8459, "WA": 8460, "ella": 8461, "Ġprop": 8462, "Ġhalt": 8463, "Ġslowing": 8464, "ĠFoods": 8465, "Ġanonymous": 8466, "kh": 8467, "Ġtraveled": 8468, "Ġcommunicate": 8469, "Ġter": 8470, "ĠHockey": 8471, "ĠRobin": 8472, "Ġswept": 8473, "Ġclinic": 8474, "ration": 8475, "len": 8476, "Ġau": 8477, "Ġcareers": 8478, "ĠSound": 8479, "Ġaddresses": 8480, "China": 8481, "ĠSr": 8482, "Ġexhibit": 8483, "ĠMotors": 8484, "ĠIl": 8485, "Ġinstall": 8486, "ĠOkay": 8487, "Ġ>>": 8488, "hood": 8489, "stand": 8490, "Ġaudit": 8491, "Ġcake": 8492, "Ġflames": 8493, "bel": 8494, "ĠMust": 8495, "ĠManafort": 8496, "Ġcommodity": 8497, "night": 8498, "ĠRoom": 8499, "ĠLanka": 8500, "Ġcommander": 8501, "ln": 8502, "Ġdatabase": 8503, "ĠSet": 8504, "Ġgraduated": 8505, "ĠTarget": 8506, "Ġoutbreak": 8507, "rou": 8508, "ĠPope": 8509, "ĠEqu": 8510, "Ġpolling": 8511, "Ġdig": 8512, "Ġbrutal": 8513, "ĠBarn": 8514, "Ġdefinition": 8515, "Ġpit": 8516, "Ġpickup": 8517, "ĠBitcoin": 8518, "ĠReid": 8519, "Ġloving": 8520, "ĠHerald": 8521, "ĠCanadians": 8522, "Ġneighbor": 8523, "Ġdies": 8524, "ione": 8525, "ĠRef": 8526, "big": 8527, "Ġguards": 8528, "including": 8529, "ente": 8530, "Ġpartially": 8531, "Image": 8532, "Ġbulk": 8533, "Ġslot": 8534, "ĠNorthwest": 8535, "ĠBarclays": 8536, "Ġairlines": 8537, "iver": 8538, "isi": 8539, "Ġsubsidiary": 8540, "Ġcont": 8541, "ĠDaniels": 8542, "Ġscript": 8543, "Ġunfair": 8544, "Ġscreens": 8545, "Ġprof": 8546, "ĠIrma": 8547, "Ġ1992": 8548, "Ġmandatory": 8549, "ĠSant": 8550, "Ġsuspicion": 8551, "NES": 8552, "ĠLauren": 8553, "igen": 8554, "Ġprevention": 8555, "Ġtension": 8556, "ema": 8557, "Ġtasks": 8558, "Ġshake": 8559, "Ġexplosive": 8560, "Ġaffects": 8561, "Ġmum": 8562, "ĠDog": 8563, "rer": 8564, "Ġopted": 8565, "Ġtrio": 8566, "Ġlesson": 8567, "Ġautomotive": 8568, "where": 8569, "ĠMontgomery": 8570, "Ġcouples": 8571, "Ġ89": 8572, "AF": 8573, "Ġinfo": 8574, "ĠForm": 8575, "Ġspectrum": 8576, "Ġbands": 8577, "Ġokay": 8578, "Ġstroke": 8579, "ĠNetanyahu": 8580, "Ġwealthy": 8581, "ĠAround": 8582, "ĠGlenn": 8583, "sec": 8584, "there": 8585, "ickets": 8586, "ĠBudget": 8587, "ĠBMW": 8588, "Ġflagship": 8589, "rier": 8590, "Ġpodcast": 8591, "Ġpursuing": 8592, "Ġpos": 8593, "ĠIslands": 8594, "ĠUrban": 8595, "page": 8596, "Ġemotions": 8597, "ided": 8598, "Ġdividends": 8599, "Ġboom": 8600, "Ġaccusing": 8601, "ird": 8602, "ĠNam": 8603, "ava": 8604, "Ġwishes": 8605, "ĠNy": 8606, "ĠStanford": 8607, "Ġcriteria": 8608, "ĠJews": 8609, "Ġengineers": 8610, "Ġaccuracy": 8611, "Ġdisplays": 8612, "Ġdeserves": 8613, "ridge": 8614, "omm": 8615, "aur": 8616, "Ġdramatically": 8617, "Ġunity": 8618, "speed": 8619, "Ġdeclining": 8620, "Ġpermits": 8621, "ĠKn": 8622, "Ġconsulting": 8623, "aux": 8624, "ATE": 8625, "ĠWat": 8626, "ĠEditor": 8627, "sy": 8628, "urn": 8629, "ĠUsing": 8630, "asc": 8631, "ital": 8632, "Ġcre": 8633, "quality": 8634, "Ġce": 8635, "Ġenemy": 8636, "Ġoffence": 8637, "icket": 8638, "ĠDick": 8639, "ĠTH": 8640, "ĠChampionships": 8641, "Ġoverwhelming": 8642, "rib": 8643, "ku": 8644, "rap": 8645, "Ġhomer": 8646, "acion": 8647, "member": 8648, "erv": 8649, "aney": 8650, "MB": 8651, "eded": 8652, "Ġpunishment": 8653, "Ġnegotiate": 8654, "ĠFile": 8655, "stream": 8656, "ĠHur": 8657, "Ġnose": 8658, "ĠFab": 8659, "iter": 8660, "Ġpainful": 8661, "ITY": 8662, "eren": 8663, "Ġcollecting": 8664, "Additional": 8665, "Ġentrepreneurs": 8666, "bal": 8667, "Ġexploring": 8668, "Ġguitar": 8669, "Ġpartnerships": 8670, "Ġfurniture": 8671, "Ġauthorized": 8672, "Ġeasing": 8673, "shirt": 8674, "ĠGross": 8675, "Ġpolitician": 8676, "ĠSimpson": 8677, "Ġdrone": 8678, "ĠKatie": 8679, "Ġprofitability": 8680, "ĠNHS": 8681, "ĠSierra": 8682, "ĠNorway": 8683, "ASHINGTON": 8684, "ific": 8685, "Ġcondemned": 8686, "team": 8687, "ĠNebraska": 8688, "Ġthrilled": 8689, "iller": 8690, "Ġpatrol": 8691, "ĠWR": 8692, "orm": 8693, "Ġspectacular": 8694, "ĠKnight": 8695, "ĠTravel": 8696, "nam": 8697, "Ġmuscle": 8698, "ĠRain": 8699, "ĠColombia": 8700, "Ġnursing": 8701, "Ġmigration": 8702, "ĠMitch": 8703, "Ġreleasing": 8704, "ĠBesides": 8705, "ĠMul": 8706, "Ġheadline": 8707, "Ġcontemporary": 8708, "Ġdev": 8709, "ĠChan": 8710, "Ġindicates": 8711, "ĠAp": 8712, "ĠLt": 8713, "ĠMarvel": 8714, "Ġremembered": 8715, "Â®": 8716, "ĠForces": 8717, "ĠColin": 8718, "ĠGabriel": 8719, "Ġobjects": 8720, "ĠRHP": 8721, "kar": 8722, "ĠKo": 8723, "Ġsignals": 8724, "Ġinner": 8725, "real": 8726, "RO": 8727, "Ġromantic": 8728, "cat": 8729, "ĠKel": 8730, "Ġgut": 8731, "ĠBoys": 8732, "Ġyoungest": 8733, "ĠCeltics": 8734, "Ġslated": 8735, "Ġremind": 8736, "Ġproductive": 8737, "set": 8738, "Co": 8739, "ĠBailey": 8740, "Ġrenewable": 8741, "ĠCarson": 8742, "ĠDj": 8743, "ĠKos": 8744, "Ġurge": 8745, "Ġfin": 8746, "Ġpursuit": 8747, "ĠCON": 8748, "ĠChapter": 8749, "Ġpal": 8750, "Ġgate": 8751, "ĠPackers": 8752, "ĠReports": 8753, "ĠRugby": 8754, "ĠMasters": 8755, "MO": 8756, "Ġ98": 8757, "Ġcatches": 8758, "ĠAgreement": 8759, "ĠTillerson": 8760, "ĠIce": 8761, "Ġrumors": 8762, "ĠLeonard": 8763, "ĠDolphins": 8764, "ĠLP": 8765, "top": 8766, "ĠCrist": 8767, "ĠHon": 8768, "Ġblaze": 8769, "Ġrhetoric": 8770, "ands": 8771, "ady": 8772, "David": 8773, "igh": 8774, "Ġbuzz": 8775, "ĠStrong": 8776, "Ġshocking": 8777, "ĠRh": 8778, "Ġnegotiating": 8779, "Ġtender": 8780, "ĠJohnny": 8781, "ĠMario": 8782, "Ġ97": 8783, "ĠHeritage": 8784, "Ġexists": 8785, "Ġprayers": 8786, "Ġlengthy": 8787, "Ġsafer": 8788, "ĠHalloween": 8789, "ĠJared": 8790, "ĠConnect": 8791, "Ġbump": 8792, "Ġstrain": 8793, "Ġfilling": 8794, "Ġtrauma": 8795, "Ġcompleting": 8796, "cht": 8797, "Ġkillings": 8798, "anne": 8799, "GE": 8800, "ĠRescue": 8801, "Ġdealers": 8802, "Ġlocals": 8803, "ĠVictor": 8804, "Ġtragic": 8805, "Ġdelivers": 8806, "orts": 8807, "Ġrugby": 8808, "Ġinstallation": 8809, "asa": 8810, "ĠBart": 8811, "Ġjournal": 8812, "school": 8813, "ĠCome": 8814, "ĠVeterans": 8815, "Sun": 8816, "Ġcrowds": 8817, "Ġtransparent": 8818, "Ġimplications": 8819, "ĠHuawei": 8820, "sex": 8821, "Ġrallied": 8822, "Ġresponses": 8823, "Ġdebris": 8824, "Ġconvention": 8825, "Ġmothers": 8826, "BE": 8827, "ĠRoute": 8828, "Ġrebel": 8829, "ĠEmmanuel": 8830, "aster": 8831, "Ġunderstands": 8832, "pound": 8833, "ĠCastle": 8834, "Ġ2021": 8835, "rik": 8836, "ĠGR": 8837, "Ġconvince": 8838, "ault": 8839, "Ġpassionate": 8840, "ĠSciences": 8841, "Ġarrives": 8842, "idad": 8843, "Ġcelebrities": 8844, "ends": 8845, "ĠFans": 8846, "Ġdish": 8847, "ĠCorps": 8848, "hat": 8849, "Ġemployer": 8850, "ĠHy": 8851, "Ġpowered": 8852, "Ġgrandmother": 8853, "ĠFL": 8854, "oured": 8855, "VE": 8856, "ĠInst": 8857, "ĠPerez": 8858, "Ġtune": 8859, "Ġcitizenship": 8860, "Ġignore": 8861, "Ġdoubles": 8862, "IB": 8863, "Ġprogrammes": 8864, "inda": 8865, "Ġentities": 8866, "ĠInterior": 8867, "Ġprompting": 8868, "Ġwire": 8869, "Ġtheatre": 8870, "%)": 8871, "Ġheels": 8872, "ĠJu": 8873, "Ġdeposits": 8874, "Ġtrash": 8875, "mond": 8876, "she": 8877, "iana": 8878, "Ġislands": 8879, "ĠTommy": 8880, "Ġpub": 8881, "Ġdiscipline": 8882, "ĠSW": 8883, "Ġmusicians": 8884, "Ġembassy": 8885, "ĠQB": 8886, "hander": 8887, "UES": 8888, "ĠFerguson": 8889, "Ġblocking": 8890, "ahn": 8891, "Ġfines": 8892, "Ġtactics": 8893, "Ġbullet": 8894, "Ġequipped": 8895, "Ġescaped": 8896, "ĠSil": 8897, "ĠPack": 8898, "ĠAthletic": 8899, "ĠMic": 8900, "ĠDoes": 8901, "ĠCarr": 8902, "ĠChargers": 8903, "ĠKyl": 8904, "Ġzones": 8905, "µ": 8906, "iki": 8907, "Ġgreatly": 8908, "ĠMD": 8909, "Ġimmigrant": 8910, "ĠConstruction": 8911, "ĠBorn": 8912, "iment": 8913, "ĠWade": 8914, "Ġvisa": 8915, "Ġgenuine": 8916, "Ġelectronics": 8917, "ĠSat": 8918, "Ġsponsors": 8919, "ĠMontana": 8920, "Ġspell": 8921, "ĠSachs": 8922, "ĠEt": 8923, "Ġfoster": 8924, "Ġlocker": 8925, "Ġexplaining": 8926, "ĠAge": 8927, "Ġgunman": 8928, "Ġsauce": 8929, "Ġcry": 8930, "Ġstimulus": 8931, "Ġarray": 8932, "Ġcompare": 8933, "Ġboats": 8934, "Ġext": 8935, "iders": 8936, "ĠAst": 8937, "ĠParks": 8938, "ester": 8939, "Ġ94": 8940, "Ġrelating": 8941, "Ġvegetables": 8942, "Ġaccountable": 8943, "Ġhyper": 8944, "ĠWim": 8945, "Ġnewest": 8946, "ĠRome": 8947, "ĠChancellor": 8948, "CBS": 8949, "Ġbusinessman": 8950, "ĠDelaware": 8951, "Ġlands": 8952, "court": 8953, "aria": 8954, "Ġapproaching": 8955, "cker": 8956, "ĠSalt": 8957, "ĠMak": 8958, "Ġtreating": 8959, "Ġsubsequently": 8960, "ĠEll": 8961, "xton": 8962, "Ġ180": 8963, "Ġdetermination": 8964, "ĠSalman": 8965, "ĠJoel": 8966, "Ġclassified": 8967, "Ġspan": 8968, "Ġearthquake": 8969, "ranked": 8970, "Ġ96": 8971, "ĠTiger": 8972, "Ġadvocacy": 8973, "mit": 8974, "Ġcolleges": 8975, "ĠYeah": 8976, "ĠCaptain": 8977, "Ġorange": 8978, "Ġprojections": 8979, "Ġelectrical": 8980, "ĠMA": 8981, "olog": 8982, "ĠNewcastle": 8983, "oppers": 8984, "Ġrepresentation": 8985, "Ġlawsuits": 8986, "just": 8987, "aced": 8988, "ĠRace": 8989, "ĠAqu": 8990, "ĠBills": 8991, "Ġexclusively": 8992, "ĠProfile": 8993, "Ġhometown": 8994, "ĠStan": 8995, "Ġstarring": 8996, "Ġdeciding": 8997, "ĠRating": 8998, "ĠMedicare": 8999, "ĠTransport": 9000, "Ġmystery": 9001, "ĠTa": 9002, "ĠPad": 9003, "ĠSwedish": 9004, "ĠCarroll": 9005, "about": 9006, "Ġtorn": 9007, "Ġnurse": 9008, "NE": 9009, "Ġwaited": 9010, "ĠJeffrey": 9011, "ĠUntil": 9012, "Ġbone": 9013, "ĠBobby": 9014, "Ġpronounced": 9015, "Ġpharmaceutical": 9016, "ĠGallery": 9017, "ĠMatch": 9018, "Ġeconomists": 9019, "ĠMarketing": 9020, "face": 9021, "ĠPetroleum": 9022, "ories": 9023, "ĠMets": 9024, "ĠCore": 9025, "billion": 9026, "Ġexamination": 9027, "ĠPorter": 9028, "2016": 9029, "Ġgolden": 9030, "Ġsem": 9031, "ĠDuterte": 9032, "ĠJefferson": 9033, "ĠTehran": 9034, "ĠLeicester": 9035, "ĠDA": 9036, "Ġadapt": 9037, "ĠDame": 9038, "ĠRic": 9039, "Ġunchanged": 9040, "ect": 9041, "Ġsections": 9042, "kg": 9043, "igned": 9044, "Ġfilings": 9045, "Ġreact": 9046, "Ġurgent": 9047, "Ġvessels": 9048, "Ġspark": 9049, "Ġbutter": 9050, "ĠCons": 9051, "Ġstating": 9052, "Ġcorporations": 9053, "ĠHus": 9054, "Ġdamaging": 9055, "raw": 9056, "Ġequality": 9057, "Two": 9058, "ĠMills": 9059, "iu": 9060, "Ġobligation": 9061, "ĠBrook": 9062, "arian": 9063, "Re": 9064, "Ġphotographs": 9065, "Ġepic": 9066, "ĠStudent": 9067, "ĠTherefore": 9068, "Ġgod": 9069, "ĠFILE": 9070, "iqu": 9071, "Ġdescribing": 9072, "Ġproceed": 9073, "Ġcas": 9074, "ĠKat": 9075, "ĠBra": 9076, "Ġadequate": 9077, "Ġpassage": 9078, "Ġthanked": 9079, "USA": 9080, "ĠNeither": 9081, "ĠLegislature": 9082, "Ġfinances": 9083, "Ġinst": 9084, "ĵ": 9085, "ĠAngels": 9086, "Ġvet": 9087, "ĠDead": 9088, "Ex": 9089, "Ġkicks": 9090, "force": 9091, "Ġsoy": 9092, "ĠWindsor": 9093, "Ġenhanced": 9094, "Ġ1993": 9095, "ĠCzech": 9096, "Ġgradually": 9097, "ĠMagic": 9098, "Ġshadow": 9099, "Ġneighborhoods": 9100, "ĠRivers": 9101, "Ġrapper": 9102, "ĠGirl": 9103, "ĠRot": 9104, "Ġcrackdown": 9105, "fish": 9106, "Ġpreventing": 9107, "Ġproduces": 9108, "ĠMi": 9109, "Ġnotified": 9110, "Ġunderground": 9111, "WE": 9112, "Ġadmits": 9113, "Ġboxing": 9114, "Ġrefer": 9115, "Ġcommitments": 9116, "ĠWoman": 9117, "Ġdenies": 9118, "col": 9119, "ĠSide": 9120, "Ġambulance": 9121, "ĠRodgers": 9122, "Ġaftermath": 9123, "Ġdeck": 9124, "irmed": 9125, "Ġerrors": 9126, "ĠConvention": 9127, "Ġcurb": 9128, "ĠShop": 9129, "ĠThai": 9130, "Ġma": 9131, "Ġrespected": 9132, "ĠMVP": 9133, "Ġborrowing": 9134, "Ġcruise": 9135, "ĠSure": 9136, "Ġsentencing": 9137, "ĠObamacare": 9138, "ĠIr": 9139, "ĠSale": 9140, "ĠPete": 9141, "Ġopenly": 9142, "Ġstartup": 9143, "rock": 9144, "Ġcargo": 9145, "Ġtelecom": 9146, "ĠDownload": 9147, "Ġextending": 9148, "ĠCurrent": 9149, "Ġcompetitions": 9150, "ĠKids": 9151, "Ġshy": 9152, "ĠKerry": 9153, "ĠNever": 9154, "ĠDevils": 9155, "Ġprim": 9156, "Con": 9157, "Ġcurve": 9158, "Ġassumed": 9159, "Ġadjust": 9160, "Ġimmune": 9161, "UE": 9162, "ĠUr": 9163, "Ġconventional": 9164, "Ġgrandchildren": 9165, "ĠBol": 9166, "Ad": 9167, "ĠMaduro": 9168, "fi": 9169, "ĠUAE": 9170, "ĠOrgan": 9171, "Ġindicating": 9172, "iem": 9173, "ĠAgainst": 9174, "ĠAmbassador": 9175, "ĠSeoul": 9176, "Ġcriminals": 9177, "how": 9178, "put": 9179, "Ġreminded": 9180, "Ġparked": 9181, "lich": 9182, "Ġcontinent": 9183, "Ġmatched": 9184, "ĠNicole": 9185, "Ġgenetic": 9186, "Ġhumanity": 9187, "ĠTem": 9188, "Ġindicator": 9189, "Ġvessel": 9190, "Ġdefendant": 9191, "ĠGriffin": 9192, "jan": 9193, "Ġvend": 9194, "boro": 9195, "Ġbrokerage": 9196, "ĠFall": 9197, "Ġmere": 9198, "VILLE": 9199, "Ġlasted": 9200, "ĠMind": 9201, "Ġpatch": 9202, "ĠInsider": 9203, "ĠComm": 9204, "Ġtechnique": 9205, "ĠIM": 9206, "ĠCavaliers": 9207, "Ġshame": 9208, "Ġmil": 9209, "oot": 9210, "irt": 9211, "Ġcop": 9212, "ĠLeon": 9213, "Ġfrozen": 9214, "Ġslip": 9215, "pton": 9216, "Ġpanels": 9217, "Ġpitching": 9218, "Ġleather": 9219, "ĠLogan": 9220, "ĠNearly": 9221, "urch": 9222, "Ġinstructions": 9223, "ĠRow": 9224, "ĠKurdish": 9225, "this": 9226, "Ġlegendary": 9227, "su": 9228, "Ġstabbed": 9229, "sters": 9230, "Ġteenage": 9231, "def": 9232, "Ġoversight": 9233, "Ġvolatile": 9234, "Ġtransmission": 9235, "ĠSgt": 9236, "ĠIndigenous": 9237, "ĠOxford": 9238, "ĠCasey": 9239, "Ġcor": 9240, "Ġsalaries": 9241, "Ġsponsor": 9242, "Ġprescription": 9243, "mat": 9244, "ĠLeeds": 9245, "ĠPakistani": 9246, "Ġevil": 9247, "Ġtables": 9248, "ĠAbdul": 9249, "Ġexpectation": 9250, "Ġlegislature": 9251, "ĠLin": 9252, "¹": 9253, "Ġcontractor": 9254, "Ġshifting": 9255, "Ġgenerous": 9256, "ĠEddie": 9257, "Ġpuck": 9258, "utt": 9259, "Ġdubbed": 9260, "Ġnowhere": 9261, "Ġbetting": 9262, "Ġdisclose": 9263, "Ĥ": 9264, "ĠFashion": 9265, "ĠHarper": 9266, "handed": 9267, "isha": 9268, "ĠReds": 9269, "Ġachievements": 9270, "ume": 9271, "Ġshootings": 9272, "Ġadvisers": 9273, "ĠEaster": 9274, "Ġinternationally": 9275, "ĠWi": 9276, "ĠGandhi": 9277, "ĠChristians": 9278, "Ġrecruiting": 9279, "Ġexperiment": 9280, "Ġsol": 9281, "Ġdifficulties": 9282, "Ġinfluential": 9283, "Ġhybrid": 9284, "Ġformation": 9285, "ĠBoulevard": 9286, "Ġflags": 9287, "Ġformula": 9288, "front": 9289, "Ġinclusion": 9290, "ĠNone": 9291, "ICE": 9292, "Ġfilming": 9293, "ĠLou": 9294, "ĠReynolds": 9295, "Ġpump": 9296, "Ġexceptional": 9297, "ANG": 9298, "ĠCorporate": 9299, "SAN": 9300, "ĠHealthcare": 9301, "ĠUkrainian": 9302, "aron": 9303, "Ġpants": 9304, "Ġdrops": 9305, "ete": 9306, "ĠStudies": 9307, "Ġwounds": 9308, "END": 9309, "Ġshower": 9310, "Ġreviewing": 9311, "ĠGreater": 9312, "ĠÂ»": 9313, "itors": 9314, "alled": 9315, "Ġsqu": 9316, "ĠRonald": 9317, "ĠInv": 9318, "Ġtougher": 9319, "Ġbalanced": 9320, "Ġlined": 9321, "Ġprinciple": 9322, "Ġ1950": 9323, "Ġleak": 9324, "Be": 9325, "Ġcircuit": 9326, "Ġunfortunate": 9327, "ĠGran": 9328, "ĠFish": 9329, "Ġfriendship": 9330, "asp": 9331, "OO": 9332, "Ġobligations": 9333, "Ġcoup": 9334, "OK": 9335, "Ġbreakdown": 9336, "Ġhook": 9337, "Ġresearcher": 9338, "inated": 9339, "ĠMarie": 9340, "ĠGab": 9341, "ĠWA": 9342, "quez": 9343, "General": 9344, "ĠSwift": 9345, "Ġgust": 9346, "ĠCarol": 9347, "ĠCentury": 9348, "ĠOPEC": 9349, "ĠRd": 9350, "ĠCop": 9351, "Ġsubjects": 9352, "ĠComments": 9353, "ases": 9354, "Ġrelation": 9355, "ĠEnvironment": 9356, "ı": 9357, "Ġgasoline": 9358, "ĠLog": 9359, "Ġicon": 9360, "Ġprofitable": 9361, "ĠRetail": 9362, "ANC": 9363, "Ġappealing": 9364, "Ġvillages": 9365, "Ġpizza": 9366, "Ġmall": 9367, "Ġtower": 9368, "ĠLinda": 9369, "Ġaccomplished": 9370, "Ġpod": 9371, "Ġleaked": 9372, "ĠWed": 9373, "Ġmer": 9374, "Ġopposing": 9375, "!'": 9376, "Ġstomach": 9377, "Ġrevealing": 9378, "Ġho": 9379, "DF": 9380, "ĠSterling": 9381, "Ġsolely": 9382, "Ġpres": 9383, "ĠCy": 9384, "ĠLatest": 9385, "ĠPitt": 9386, "ĠThink": 9387, "Ġcapability": 9388, "aled": 9389, "Ġexecuted": 9390, "alling": 9391, "ĠSilva": 9392, "Ġrestricted": 9393, "Ġdeclaration": 9394, "Ġkilometres": 9395, "rol": 9396, "Ġidentifying": 9397, "Ġdonors": 9398, "vent": 9399, "Ġcostly": 9400, "ense": 9401, "ĠSeeking": 9402, "OURCE": 9403, "iving": 9404, "Ġplacing": 9405, "tech": 9406, "Ġbottles": 9407, "writer": 9408, "ĠSeahawks": 9409, "oming": 9410, "ĠArthur": 9411, "ously": 9412, "bin": 9413, "ĠVa": 9414, "Ġbias": 9415, "Ġliability": 9416, "ift": 9417, "rak": 9418, "aves": 9419, "Ġcautious": 9420, "ĠPrize": 9421, "iley": 9422, "ĠSharma": 9423, "global": 9424, "Ġwars": 9425, "sm": 9426, "ĠRemember": 9427, "wind": 9428, "ĠRichardson": 9429, "ĠSum": 9430, "ĠVincent": 9431, "ĠRice": 9432, "inf": 9433, "Ġconsultation": 9434, "range": 9435, "Ġbacteria": 9436, "Ġarchitecture": 9437, "Ġpole": 9438, "ĠMach": 9439, "Ġcattle": 9440, "Ġabused": 9441, "being": 9442, "ĠHERE": 9443, "Ġfame": 9444, "Ġhearings": 9445, "ĠBrit": 9446, "Ġjoins": 9447, "ĠMcGregor": 9448, "Ġoppose": 9449, "Ġcheer": 9450, "itting": 9451, "imes": 9452, "Ġusage": 9453, "Ġstint": 9454, "Ġoutlet": 9455, "Ġshoppers": 9456, "ĠBaptist": 9457, "Ġinappropriate": 9458, "ĠALSO": 9459, "Ġstealing": 9460, "Ġpledge": 9461, "ĠRan": 9462, "Ġphotographer": 9463, "Ġprevented": 9464, "Ġ01": 9465, "ĠEngineering": 9466, "ĠProducts": 9467, "Ġuniverse": 9468, "ĠMcCarthy": 9469, "¿": 9470, "graded": 9471, "Ġinspection": 9472, "Ġind": 9473, "Fi": 9474, "aren": 9475, "Ġprotections": 9476, "Ġsorts": 9477, "ĠWorks": 9478, "Ġbillionaire": 9479, "ĠGay": 9480, "ĠiPad": 9481, "IX": 9482, "Ġdefendants": 9483, "band": 9484, "Ġfarms": 9485, "Ġhom": 9486, "gal": 9487, "iant": 9488, "Ġnortheast": 9489, "ĠJoint": 9490, "Ġcanceled": 9491, "Ġtoys": 9492, "Ġrein": 9493, "ĠTumblr": 9494, "pees": 9495, "ĠAut": 9496, "Police": 9497, "Ġaide": 9498, "Ġachieving": 9499, "Ġmund": 9500, "ĠCommercial": 9501, "first": 9502, "Ġanticipate": 9503, "iac": 9504, "Ġprobation": 9505, "hem": 9506, "Ġports": 9507, "ĠKer": 9508, "Ġsupplier": 9509, "ĠFather": 9510, "ĠAnti": 9511, "ashed": 9512, "ĠTable": 9513, "bledon": 9514, "Ġunf": 9515, "ĠRash": 9516, "ĠLeBron": 9517, "Car": 9518, "bu": 9519, "ĠDerek": 9520, "Ġaccounted": 9521, "ĠPri": 9522, "nings": 9523, "Ġreceives": 9524, "lev": 9525, "Ġbilateral": 9526, "ĠList": 9527, "ĠLG": 9528, "ĠJazz": 9529, "Ġrestored": 9530, "Ġbattles": 9531, "ials": 9532, "Ġoccupied": 9533, "Ġrepairs": 9534, "Ġradar": 9535, "ĠMLB": 9536, "ĠNC": 9537, "Ġflexible": 9538, "ĠCommand": 9539, "Ġcoat": 9540, "ĠVir": 9541, "ĠColts": 9542, "ĠBC": 9543, "Ġtwin": 9544, "Ġprisoners": 9545, "Ġslowed": 9546, "hop": 9547, "ĠInn": 9548, "Ġconflicts": 9549, "Ġmeasured": 9550, "Ġautonomous": 9551, "ĠBow": 9552, "Ġdisc": 9553, "inson": 9554, "ĠSche": 9555, "aire": 9556, "ĠSU": 9557, "ĠPeterson": 9558, "Ġdrafted": 9559, "ĠPelosi": 9560, "ĠSoon": 9561, "Ġmechanism": 9562, "Ġaccountability": 9563, "ĠNortheast": 9564, "Ġfo": 9565, "Ġanalytics": 9566, "ĠEverything": 9567, "Ġperceived": 9568, "bers": 9569, "Ġcelebrations": 9570, "Ġinstruments": 9571, "Ġstrip": 9572, "ĠJuventus": 9573, "Ġunfortunately": 9574, "ĠGA": 9575, "Ġwrestling": 9576, "Ġstatue": 9577, "vis": 9578, "five": 9579, "Ġmarine": 9580, "ĠSamuel": 9581, "Ġresponsibilities": 9582, "hill": 9583, "Ġrecruit": 9584, "Ġreferee": 9585, "ĠRail": 9586, "ĠEagle": 9587, "ĠCongressional": 9588, "Ġbreathing": 9589, "Ġbass": 9590, "hit": 9591, "Ġspreading": 9592, "Ġevacuated": 9593, "Ġintellectual": 9594, "Ġsovereign": 9595, "ocked": 9596, "Ġslammed": 9597, "Ġformerly": 9598, "Ġarch": 9599, "Ġdifficulty": 9600, "ĠAFC": 9601, "ĠFresh": 9602, "Ġinvite": 9603, "oner": 9604, "ĠMich": 9605, "Ġpitches": 9606, "stock": 9607, "Ġinitiated": 9608, "ĠKu": 9609, "ĠFlorence": 9610, "yd": 9611, "ĠFast": 9612, "Ġmusician": 9613, "ĠChile": 9614, "anga": 9615, "Ġdairy": 9616, "Ġcontractors": 9617, "ador": 9618, "ĠPlanning": 9619, "Ġultra": 9620, "Ġprayer": 9621, "Ġsuggestions": 9622, "ĠEk": 9623, "Ġrandom": 9624, "ĠSullivan": 9625, "Ġsensor": 9626, "Ġhomicide": 9627, "ĠIncome": 9628, "Ġsettings": 9629, "Ġacknowledge": 9630, "ĠStay": 9631, "Ġterminal": 9632, "Ġ1991": 9633, "West": 9634, "hard": 9635, "arc": 9636, "Ġcombine": 9637, "Ġprivately": 9638, "Ġbarrier": 9639, "Ġmedian": 9640, "Ġwhereas": 9641, "ĠTitans": 9642, "Ġincentives": 9643, "Ġhistorically": 9644, "Ġindictment": 9645, "Ġhiding": 9646, "ĠPDT": 9647, "Ġrebuild": 9648, "hol": 9649, "Ġpour": 9650, "Ġairports": 9651, "ĠEdinburgh": 9652, "Ġappoint": 9653, "ĠJul": 9654, "Ġconfusion": 9655, "Ġdam": 9656, "ork": 9657, "Ġcalculated": 9658, "Ġhood": 9659, "ĠTemple": 9660, "ĠYorkshire": 9661, "EP": 9662, "ented": 9663, "Ġapology": 9664, "awi": 9665, "Ġfacilitate": 9666, "ĠSheffield": 9667, "Ġrides": 9668, "Ġcompelling": 9669, "ĠGonzalez": 9670, "roll": 9671, "ONG": 9672, "UP": 9673, "ĠAj": 9674, "pen": 9675, "ĠVar": 9676, "ĠIPO": 9677, "ĠAnimal": 9678, "Ġshifted": 9679, "Ġ140": 9680, "Ġtobacco": 9681, "El": 9682, "ild": 9683, "Ġuncertain": 9684, "Un": 9685, "Ġcaps": 9686, "Ġrecreational": 9687, "ĠTu": 9688, "Ġenc": 9689, "More": 9690, "iko": 9691, "ĠEverton": 9692, "ĠWalk": 9693, "Ġmurdered": 9694, "Ġpur": 9695, "Ġdivisions": 9696, "ivo": 9697, "Ġfarming": 9698, "Ġcourage": 9699, "ped": 9700, "Ġcrying": 9701, "Ġattributed": 9702, "Ã©e": 9703, "Ġimplementing": 9704, "ĠWang": 9705, "Ġspeeds": 9706, "alk": 9707, "aming": 9708, "eries": 9709, "Ġavoided": 9710, "ĠMessi": 9711, "Ġconsiderable": 9712, "rt": 9713, "Ġinauguration": 9714, "ĠPH": 9715, "Ġsoldier": 9716, "Ġore": 9717, "ollywood": 9718, "otive": 9719, "ĠAuburn": 9720, "ĠSav": 9721, "ĠPut": 9722, "Ġemphasis": 9723, "Ġaf": 9724, "owed": 9725, "Ġdiagnosis": 9726, "Ġcart": 9727, "Ġassisted": 9728, "ĠOrder": 9729, "ĠEstate": 9730, "Ġintends": 9731, "ĠCommon": 9732, "Ġadventure": 9733, "Ġbeliefs": 9734, "Ġlasting": 9735, "cel": 9736, "Ġdeployment": 9737, "tra": 9738, "ĠStories": 9739, "Ġquote": 9740, "Ġfeared": 9741, "Ġconvenience": 9742, "Ġoptimism": 9743, "Ġscientist": 9744, "ĠEnterprise": 9745, "ĠRex": 9746, "ĠFel": 9747, "Ġposes": 9748, "Ġroot": 9749, "Ġevacuation": 9750, "Ġpresidents": 9751, "ĠRather": 9752, "Ġgrave": 9753, "ĠHeights": 9754, "Ġjumping": 9755, "driven": 9756, "Ġaluminum": 9757, "Ġholders": 9758, "Ġboot": 9759, "iber": 9760, "Ġprecious": 9761, "uation": 9762, "FP": 9763, "uses": 9764, "Ġcommentary": 9765, "Ġadvances": 9766, "ĠNissan": 9767, "Ġbronze": 9768, "Ġinspire": 9769, "Ġstarters": 9770, "ĠEvan": 9771, "rah": 9772, "body": 9773, "Ġcrops": 9774, "Ġseeds": 9775, "Ġharsh": 9776, "ĠHomeland": 9777, "Ġenabled": 9778, "ological": 9779, "Ġworkshop": 9780, "Ġchains": 9781, "amps": 9782, "Ġamongst": 9783, "ĠBear": 9784, "Ġcertified": 9785, "ĠJulie": 9786, "Ġmountains": 9787, "VA": 9788, "Ġfed": 9789, "Ġbuyer": 9790, "ahl": 9791, "ĠBos": 9792, "ĠCrystal": 9793, "Ġquest": 9794, "ĠStein": 9795, "Ġacceptable": 9796, "Ġunbeaten": 9797, "iring": 9798, "ural": 9799, "Ġuncomfortable": 9800, "Ġpartial": 9801, "Ġsacrifice": 9802, "ĠGrande": 9803, "Ġarrangement": 9804, "Ġpackaging": 9805, "screen": 9806, "Ġmirror": 9807, "Ġsweep": 9808, "Ġconnecting": 9809, "Ġpanic": 9810, "ĠJacksonville": 9811, "ĠKremlin": 9812, "Ġorigin": 9813, "Brien": 9814, "Ġnorthwest": 9815, "Ġcarriers": 9816, "ĠRiley": 9817, "Ġaud": 9818, "Ġappreciation": 9819, "Ġeliminated": 9820, "ĠAnalyst": 9821, "CR": 9822, "Ġfirearm": 9823, "Ġaccommodate": 9824, "Ġstructural": 9825, "Ġappealed": 9826, "Ġcharter": 9827, "ressing": 9828, "Ġalike": 9829, "white": 9830, "Ġslowdown": 9831, "Ġweigh": 9832, "ĠPalmer": 9833, "ound": 9834, "ĠConn": 9835, "Ġbranches": 9836, "Ġace": 9837, "Ġinsists": 9838, "yo": 9839, "ĠLynn": 9840, "ĠCC": 9841, "ĠWithin": 9842, "Ġcoll": 9843, "Ġsustain": 9844, "Ġemerge": 9845, "ĠBattle": 9846, "VER": 9847, "Ġaviation": 9848, "Ġenables": 9849, "ĠProduction": 9850, "ĠGrove": 9851, "Ġnationally": 9852, "ĠBaldwin": 9853, "rent": 9854, "Ġfirearms": 9855, "irm": 9856, "Ġconsiders": 9857, "ĠCosby": 9858, "ĠMcK": 9859, "ĠEnt": 9860, "Ġincumbent": 9861, "iance": 9862, "Ġgiants": 9863, "Ġkan": 9864, "Ġminimal": 9865, "ivity": 9866, "ĠSay": 9867, "ĠNass": 9868, "Ġlovely": 9869, "ĠFurthermore": 9870, "Ġdisplaced": 9871, "Ġcontacts": 9872, "NY": 9873, "Ġtechnological": 9874, "ancy": 9875, "Ġant": 9876, "ope": 9877, "ĠFY": 9878, "Ġfavorable": 9879, "ĠVirgin": 9880, "Ġcasual": 9881, "ĠLat": 9882, "Ġpopulations": 9883, "Ġromance": 9884, "Ġforgotten": 9885, "Ġfleeing": 9886, "Ġspecialty": 9887, "Ġdrill": 9888, "Ġapplying": 9889, "Ġcocaine": 9890, "rea": 9891, "Ġheroin": 9892, "Ġsweeping": 9893, "ĠMaj": 9894, "Ġtroubled": 9895, "Ġcolleague": 9896, "Ġedged": 9897, "omes": 9898, "ĠHappy": 9899, "Â´": 9900, "Ġmilitant": 9901, "boy": 9902, "aver": 9903, "Yes": 9904, "llo": 9905, "Ġsupporter": 9906, "ĠSubscribe": 9907, "ĠBird": 9908, "ĠGibson": 9909, "Ġhill": 9910, "Ġnewspapers": 9911, "ĠPHOTO": 9912, "Ġouting": 9913, "Ġdefine": 9914, "Ġann": 9915, "Ġrobot": 9916, "Ġregret": 9917, "ĠCould": 9918, "raz": 9919, "Ġceiling": 9920, "Ġorganizers": 9921, "ĠTw": 9922, "Ġcriticised": 9923, "ĠJoh": 9924, "ĠJe": 9925, "ĠBulls": 9926, "Ġteeth": 9927, "ĠRanch": 9928, "ĠAndrea": 9929, "Ġconservatives": 9930, "Ġmag": 9931, "vey": 9932, "Ġpredecessor": 9933, "ĠJPMorgan": 9934, "Ġdraws": 9935, "umber": 9936, "Ġvaccine": 9937, "ĠDas": 9938, "Ġdisappeared": 9939, "ĠIron": 9940, "Ġlitigation": 9941, "vert": 9942, "Ġbelong": 9943, "ĠRet": 9944, "owers": 9945, "rain": 9946, "controlled": 9947, "ĠKil": 9948, "Ġrehab": 9949, "ĠAustria": 9950, "Ġprivilege": 9951, "Ġbounce": 9952, "Ġbout": 9953, "ĠIslamist": 9954, "Ġtaxi": 9955, "ody": 9956, ".'\"": 9957, "Ġdos": 9958, "shire": 9959, "Ġaccidents": 9960, "Ġdemonstration": 9961, "His": 9962, "ĠBO": 9963, "ĠICE": 9964, "van": 9965, "File": 9966, "ĠManning": 9967, "ounded": 9968, "Ġdirections": 9969, "lled": 9970, "Ġoffences": 9971, "Ġlaptop": 9972, "ĠUniversal": 9973, "Ġmilestone": 9974, "ĠNarendra": 9975, "Ġnotion": 9976, "Ġuns": 9977, "ĠLower": 9978, "Ġmidfield": 9979, "Ġoutper": 9980, "trans": 9981, "ĠJa": 9982, "three": 9983, "Adds": 9984, "Ġpressures": 9985, "Ġprohibited": 9986, "Ġutilities": 9987, "Ġbes": 9988, "ĠReporter": 9989, "Ġcommodities": 9990, "leton": 9991, "Ġslower": 9992, "EE": 9993, "auer": 9994, "Ġtablet": 9995, "sl": 9996, "iously": 9997, "Ġaiming": 9998, "eland": 9999, "ĠNEXT": 10000, "tered": 10001, "IVE": 10002, "onic": 10003, "May": 10004, "ĠMilitary": 10005, "Mark": 10006, "Ġlender": 10007, "mate": 10008, "Ġaboard": 10009, "they": 10010, "Ġrespondents": 10011, "Ġconversion": 10012, "Ġsecuring": 10013, "Ġentity": 10014, "ĠHarbor": 10015, "ĠCu": 10016, "Ġcats": 10017, "ĠACC": 10018, "ĠIbrahim": 10019, "GL": 10020, "Ġinvitation": 10021, "Ġcond": 10022, "ĠRecords": 10023, "ĠAdrian": 10024, "Ġbrave": 10025, "Ġmineral": 10026, "Ġsooner": 10027, "Ġsatisfied": 10028, "Ġpets": 10029, "Ġnotably": 10030, "Ä±": 10031, "Ġmarking": 10032, "ĠRO": 10033, "ĠHaw": 10034, "ĠVis": 10035, "Ġmarketplace": 10036, "ĠNat": 10037, "ĠForward": 10038, "ĠLeft": 10039, "Ġaggravated": 10040, "ĠClose": 10041, "acey": 10042, "Ġlandmark": 10043, "Ġdisruption": 10044, "ĠChallenge": 10045, "ĠDays": 10046, "ĠCoun": 10047, "ahan": 10048, "Ġaides": 10049, "South": 10050, "ĠDylan": 10051, "ĠRavens": 10052, "ĠNature": 10053, "lli": 10054, "Ġdiplomats": 10055, "350": 10056, "ĠDrake": 10057, "tag": 10058, "Ġlicensed": 10059, "ĠDenmark": 10060, "Ġcancel": 10061, "Ġinstant": 10062, "DI": 10063, "Ġpunch": 10064, "ĠJenkins": 10065, "Ġstrengthening": 10066, "des": 10067, "-$": 10068, "Ġallegation": 10069, "Ġsizes": 10070, "iza": 10071, "Ġmentally": 10072, "ĠResidents": 10073, "acked": 10074, "Ġsensors": 10075, ",'\"": 10076, "illion": 10077, "ĠChampion": 10078, "Ġexcessive": 10079, "Ġhum": 10080, "ĠComp": 10081, "rend": 10082, "ĠLakes": 10083, "Ġburst": 10084, "Ġtrainer": 10085, "Ġclearing": 10086, "ĠSilicon": 10087, "Ġ350": 10088, "DE": 10089, "ĠGates": 10090, "ĠHorn": 10091, "ests": 10092, "ĠCourtesy": 10093, "Ġbipartisan": 10094, "Ġhabits": 10095, "ĠAlexa": 10096, "walk": 10097, "Ġsnapped": 10098, "ĠEight": 10099, "itis": 10100, "zel": 10101, "Ġcustoms": 10102, "Ġsouthwest": 10103, "Ġvary": 10104, "Because": 10105, "Ġpayout": 10106, "Ġaccelerate": 10107, "ĠBarr": 10108, "tu": 10109, "Ġfined": 10110, "cost": 10111, "ĠTheater": 10112, "ĠCorbyn": 10113, "Ġstem": 10114, "Ġundermine": 10115, ".;": 10116, "Ġstays": 10117, "Ġbreakthrough": 10118, "Ġturnover": 10119, "hot": 10120, "Ġtriumph": 10121, "Ġpainted": 10122, "ĠWinnipeg": 10123, "ĠKas": 10124, "ĠStuart": 10125, "irk": 10126, "Am": 10127, "Ġtrusted": 10128, "aze": 10129, "ĠLate": 10130, "Ġaccessories": 10131, "Ġmemorable": 10132, "ĠFool": 10133, "Ġrotation": 10134, "ĠBulldogs": 10135, "ĠChen": 10136, "Ġpoised": 10137, "ĠMonte": 10138, "ĠClarke": 10139, "leading": 10140, "Ġvenues": 10141, "Ġbeneficial": 10142, "ĠLiam": 10143, "ĠBrothers": 10144, "ĠNeed": 10145, "Ġconc": 10146, "olly": 10147, "ĠJulian": 10148, "ogue": 10149, "Ġfounding": 10150, "Ġsidelines": 10151, "Ġdeclare": 10152, "ĠMember": 10153, "Ġexamine": 10154, "abs": 10155, "Ġboundaries": 10156, "ĠBrisbane": 10157, "Ġlaunches": 10158, "lor": 10159, "ĠGa": 10160, "Ġthr": 10161, "expected": 10162, "wal": 10163, "ĠBarnes": 10164, "Ġclashes": 10165, "content": 10166, "ĠClemson": 10167, "iger": 10168, "Mar": 10169, "Ġaccord": 10170, "Ġsoutheast": 10171, "ģ": 10172, "ĠStarbucks": 10173, "osing": 10174, "Ġseasonal": 10175, "icking": 10176, "Ġloyalty": 10177, "Ġtent": 10178, "ĠDy": 10179, "Ġevident": 10180, "Ġlobby": 10181, "Ġtours": 10182, "Ġbombing": 10183, "uations": 10184, "Ġrises": 10185, "Ġdemonstrations": 10186, "ĠWATCH": 10187, "pin": 10188, "Ġdeb": 10189, "ĠDraft": 10190, "rog": 10191, "Ġseal": 10192, "ĠPerformance": 10193, "ĠLGBT": 10194, "Ġsed": 10195, "Ġgig": 10196, "nan": 10197, "Ġrainfall": 10198, "Ġfabric": 10199, "Ġmanages": 10200, "Ġlifting": 10201, "ĠMagazine": 10202, "ĠCriminal": 10203, "Ġhikes": 10204, "Ġcatching": 10205, "Ġ1989": 10206, "OG": 10207, "Ġdisappointment": 10208, "Ġir": 10209, "ĠEV": 10210, "stown": 10211, "pass": 10212, "120": 10213, "Ġmedals": 10214, "ĠSimmons": 10215, "Ġinaugural": 10216, "ĠCorn": 10217, "Ġmotorcycle": 10218, "lets": 10219, "ĠSkype": 10220, "Ã©t": 10221, "Ġscary": 10222, "opp": 10223, "thirds": 10224, "ĠMohamed": 10225, "Ġteenagers": 10226, "ANK": 10227, "Ġserver": 10228, "Ġouts": 10229, "Ġdishes": 10230, "four": 10231, "dr": 10232, "ĠOt": 10233, "ĠSandy": 10234, "ĠShane": 10235, "orters": 10236, "SH": 10237, "Ġtouching": 10238, "ĠNike": 10239, "ĠHBO": 10240, "driving": 10241, "Ġplug": 10242, "ĠBaseball": 10243, "eling": 10244, "hn": 10245, "ulate": 10246, "eed": 10247, "ĠChristine": 10248, "ĠGlobe": 10249, "Ġethics": 10250, "ĠTrevor": 10251, "iya": 10252, "Ġ360": 10253, "Ġawaiting": 10254, "Ġcounterpart": 10255, "Ġsubsidies": 10256, "pointers": 10257, "Ġspy": 10258, "ILL": 10259, "Ġtakeover": 10260, "ĠBeyond": 10261, "Ġsurprisingly": 10262, "TION": 10263, "ĠSong": 10264, "Ġni": 10265, "Ġcommonly": 10266, "Ġjack": 10267, "Ġsubstitute": 10268, "ews": 10269, "Ġrecalls": 10270, "ĠCommons": 10271, "Ġsin": 10272, "del": 10273, "ĠMod": 10274, "Ġpressing": 10275, "ĠTelevision": 10276, "ĠInside": 10277, "ª": 10278, "Ġbacklash": 10279, "Ġcredible": 10280, "ĠJenner": 10281, "ĠPu": 10282, "ĠStevens": 10283, "ĠWE": 10284, "Last": 10285, "Ġinsurers": 10286, "ĠJoin": 10287, "bled": 10288, "digit": 10289, "Ġflooded": 10290, "ĠShore": 10291, "ĠTrophy": 10292, "zing": 10293, "ĠImmigration": 10294, "Ġsuperior": 10295, "IAN": 10296, "Ġcasino": 10297, "Ġenabling": 10298, "Ġmeantime": 10299, "Ġperformers": 10300, "Ġproportion": 10301, "Ġlawmaker": 10302, "ĠConf": 10303, "Ġconvert": 10304, "Ġfarmer": 10305, "Ġbu": 10306, "ĠGE": 10307, "ĠRepresentative": 10308, "ĠBannon": 10309, "ĠHelp": 10310, "PT": 10311, "formed": 10312, "ĠSuperintendent": 10313, "Ġfrustrating": 10314, "ĠRegister": 10315, "ĠPolitical": 10316, "Ġboots": 10317, "ĠRu": 10318, "ĠSha": 10319, "Ġinstrument": 10320, "tor": 10321, "ĠBelt": 10322, "ĠWalsh": 10323, "Ġrecipe": 10324, "ilt": 10325, "ĠClean": 10326, "iors": 10327, "Ġtwenty": 10328, "iler": 10329, "nder": 10330, "Ġwinger": 10331, "Ġwheat": 10332, "ĠAviation": 10333, "Ġcorrupt": 10334, "Ġconnectivity": 10335, "ĠVen": 10336, "order": 10337, "esc": 10338, "break": 10339, "Ġmetals": 10340, "Ġtraditionally": 10341, "Ġbell": 10342, "Ġviolating": 10343, "rough": 10344, "Ġintroducing": 10345, "Ġguided": 10346, "ĠMol": 10347, "Ġdesert": 10348, "ĠBree": 10349, "Le": 10350, "ĠZone": 10351, "ĠGlass": 10352, "ĠEUR": 10353, "ĠYahoo": 10354, "Ġlaps": 10355, "Ġdiffer": 10356, "ĠHold": 10357, "Ġtimely": 10358, "Ġsuccessor": 10359, "Ġcomic": 10360, "Ġbears": 10361, "Ġlicence": 10362, "Ġreject": 10363, "Ġsophisticated": 10364, "Too": 10365, "Ġobjectives": 10366, "ĠId": 10367, "urers": 10368, "Ġraid": 10369, "COM": 10370, "Ġelect": 10371, "ĠHampshire": 10372, "Ġlens": 10373, "Ġdesigners": 10374, "Ġpresently": 10375, "ĠRCMP": 10376, "ĠEgyptian": 10377, "ĠWalter": 10378, "ĠWallace": 10379, "Ġ2025": 10380, "utics": 10381, "ried": 10382, "Ġrefuse": 10383, "Ġsiblings": 10384, "ĠNothing": 10385, "Ġdressing": 10386, "Ġnerve": 10387, "AST": 10388, "Ġuncertainties": 10389, "Ġtale": 10390, "ĠTalk": 10391, "Ġissuing": 10392, "shot": 10393, "ĠTak": 10394, "Ġacid": 10395, "ĠNintendo": 10396, "Ġwash": 10397, "pd": 10398, "ĠClaire": 10399, "ĠScot": 10400, "Ġsuits": 10401, "ĠBayern": 10402, "gest": 10403, "Ġapplicable": 10404, "Ġinteraction": 10405, "ĠEnforcement": 10406, "ĠRohingya": 10407, "Ġjan": 10408, "Ġunited": 10409, "ĠCoalition": 10410, "Ġlegislators": 10411, "Ġdetectives": 10412, "ĠSing": 10413, "ĠBetween": 10414, "ĠPoly": 10415, "pool": 10416, "mal": 10417, "Ġreply": 10418, "Ġschemes": 10419, "ĠHolmes": 10420, "ĠSenators": 10421, "ĠVerizon": 10422, "Ġwelcoming": 10423, "ĠCricket": 10424, "ĠMarco": 10425, "ĠYears": 10426, "ĠLiving": 10427, "Ġcounterparts": 10428, "ĠParadise": 10429, "ĠTrad": 10430, "#": 10431, "iw": 10432, "ĠSoccer": 10433, "umbled": 10434, "Ġdeceased": 10435, "heim": 10436, "Ġevaluation": 10437, "Ġwrap": 10438, "Ġmild": 10439, "aji": 10440, "ĠUCLA": 10441, "ĠNative": 10442, "president": 10443, "ĠXbox": 10444, "Ġenterprises": 10445, "ĠSlam": 10446, "oga": 10447, "Rock": 10448, "piece": 10449, "ĠColeman": 10450, "Ġcomparable": 10451, "uba": 10452, "Ġprovinces": 10453, "ĠFormula": 10454, "ipt": 10455, "Ã´": 10456, "Ġtick": 10457, "ĠIMF": 10458, "anch": 10459, "atta": 10460, "rew": 10461, "However": 10462, "LS": 10463, "etta": 10464, "ĠCustoms": 10465, "SU": 10466, "Ġpublishing": 10467, "Ġinch": 10468, "Ġkills": 10469, "¤": 10470, "ĠSus": 10471, "ĠBeth": 10472, "Ġsteam": 10473, "jpg": 10474, "pointer": 10475, "Ġturnovers": 10476, "Ġpowder": 10477, "ĠUSB": 10478, "ĠWildlife": 10479, "ĠDirect": 10480, "atively": 10481, "ĠFerrari": 10482, "Ġpleasure": 10483, "ĠMatthews": 10484, "Ġski": 10485, "ography": 10486, "ĠVermont": 10487, "ĠMargaret": 10488, "ĠMunich": 10489, "Ġlayer": 10490, "ĠProperty": 10491, "Ġeconomics": 10492, "ĠCrew": 10493, "UK": 10494, "Ġunnecessary": 10495, "ĠGlasgow": 10496, "Ġsealed": 10497, "Ġclarity": 10498, "Ġsurplus": 10499, "ĠCanyon": 10500, "ĠApart": 10501, "Ġacceptance": 10502, "ĠEllis": 10503, "uster": 10504, "rid": 10505, "ĠHawks": 10506, "Ġstatewide": 10507, "Ġthreaten": 10508, "ĠJail": 10509, "Ġinclusive": 10510, "Ġmud": 10511, "Ġpat": 10512, "Ġbitter": 10513, "Ġalternatives": 10514, "Ġaffiliate": 10515, "Ġevaluate": 10516, "ĠBaby": 10517, "Ġperception": 10518, "tim": 10519, "Ġrefusing": 10520, "Ġgrey": 10521, "Ġarguably": 10522, "Ġfirmly": 10523, "ĠDark": 10524, "Ġexcuse": 10525, "ĠRaymond": 10526, "Ġballots": 10527, "inton": 10528, "Ġ125": 10529, "ĠCatherine": 10530, "Ġsacks": 10531, "ĠDeb": 10532, "Ġworkout": 10533, "web": 10534, "Ġbatteries": 10535, "breaking": 10536, "ML": 10537, "Ġunacceptable": 10538, "ĠValentine": 10539, "ĠYOU": 10540, "ĠRT": 10541, "Ġjurisdiction": 10542, "Ġexamined": 10543, "strom": 10544, "ĠPocket": 10545, "Ġcement": 10546, "Ġuniversal": 10547, "ĠOz": 10548, "Ġkit": 10549, "Ġchurches": 10550, "Ġsuburban": 10551, "ĠKushner": 10552, "ĠDavidson": 10553, "Sports": 10554, "email": 10555, "Ġrealistic": 10556, "Ġintend": 10557, "ĠGrey": 10558, ",''": 10559, "Ġscholarship": 10560, "Ġphilosophy": 10561, "Ġwheels": 10562, "Ġmotivation": 10563, "eway": 10564, "match": 10565, "ĠDate": 10566, "John": 10567, "Ġcontrolling": 10568, "750": 10569, "aven": 10570, "Ġfilmed": 10571, "Ġ160": 10572, "ĠBrock": 10573, "ĠDetails": 10574, "Ġlogistics": 10575, "Ġassumptions": 10576, "ĠStep": 10577, "Ġfails": 10578, "ĠNotre": 10579, "Ġjuice": 10580, "Ġcounting": 10581, "Ġphotograph": 10582, "Ġfortunate": 10583, "Ġestablishing": 10584, "ĠNJ": 10585, "ĠWorkers": 10586, "ĠQuinn": 10587, "ĠHeather": 10588, "Ġtimeline": 10589, "Ġimported": 10590, "ĠNASCAR": 10591, "Ġexercises": 10592, "Ġsearched": 10593, "ĠRalph": 10594, "alf": 10595, "Ġgene": 10596, "Ġdependent": 10597, "Ã©n": 10598, "iate": 10599, "ĠBristol": 10600, "Ġhung": 10601, "Ġtropical": 10602, "Ġintensity": 10603, "ĠIdaho": 10604, "ĠMull": 10605, "Ġsuite": 10606, "Ġblockchain": 10607, "cz": 10608, "ovich": 10609, "Ġworn": 10610, "ĠLE": 10611, "AV": 10612, "emi": 10613, "Ġidentification": 10614, "Ġtunnel": 10615, "ĠARE": 10616, "ĠArm": 10617, "Ġoutrage": 10618, "Ġtwist": 10619, "uka": 10620, "ĠGra": 10621, "Ġjets": 10622, "ĠThus": 10623, "Ġcompound": 10624, "Ġfinancially": 10625, "2019": 10626, "asse": 10627, "Ġspare": 10628, "ĠNoah": 10629, "ĠMade": 10630, "ĠMom": 10631, "Ġphenomenon": 10632, "Ġnurses": 10633, "Ġoutlined": 10634, "Ġpolit": 10635, "ĠCarm": 10636, "Ġleagues": 10637, "Ġmath": 10638, "Ġmodified": 10639, "Ġwillingness": 10640, "ĠAmanda": 10641, "Ġgrandfather": 10642, "Of": 10643, "DR": 10644, "Ġdip": 10645, "ĠRAM": 10646, "ĠChristie": 10647, "Ġargues": 10648, "ĠEX": 10649, "ĠNine": 10650, "ĠScroll": 10651, "ĠTHIS": 10652, "Pro": 10653, "Ġkeys": 10654, "Ġprocessor": 10655, "Ġscam": 10656, "ĠTraining": 10657, "Ġhoney": 10658, "Ĵ": 10659, "Ġfacebook": 10660, "ĠLegal": 10661, "Ġaging": 10662, "Ġspiritual": 10663, "ĠHost": 10664, "Ġlung": 10665, "ĠUSC": 10666, "Ġdirt": 10667, "Ġfe": 10668, "after": 10669, "ĠDiana": 10670, "Ġounce": 10671, "date": 10672, "ĠFinals": 10673, "Ķ": 10674, "Ġthorough": 10675, "Ġviable": 10676, "Ġanytime": 10677, "Ġfost": 10678, "orter": 10679, "ware": 10680, "ĠHolland": 10681, "ĠMand": 10682, "ĠSend": 10683, "2013": 10684, "ĠVolkswagen": 10685, "Ġsuitable": 10686, "ifies": 10687, "Ġcomedian": 10688, "Ġneighbours": 10689, "ĠKnow": 10690, "Ġcurious": 10691, "ĠTwenty": 10692, "ĠPrevention": 10693, "ĠStephanie": 10694, "Ġpilots": 10695, "Ġstored": 10696, "Ġdire": 10697, "Ġfits": 10698, "ision": 10699, "ĠShell": 10700, "Ġshifts": 10701, "Ġpepper": 10702, "Ġattendees": 10703, "ĠName": 10704, "hers": 10705, "rip": 10706, "Ġwatchdog": 10707, "andy": 10708, "Ġbio": 10709, "Ġpublisher": 10710, "powered": 10711, "ĠCM": 10712, "rian": 10713, "ĠRand": 10714, "wise": 10715, "ĠJesse": 10716, "Ġladies": 10717, "ĠMetropolitan": 10718, "ĠMicro": 10719, "Ġkicking": 10720, "Ġmeg": 10721, "Ġclouds": 10722, "Ġtrim": 10723, "wear": 10724, "ĠML": 10725, "Ġconsists": 10726, "Ġrig": 10727, "Ġhonestly": 10728, "GS": 10729, "ĠNicholas": 10730, "Ġcope": 10731, "Ġpublish": 10732, "working": 10733, "bur": 10734, "ĠNar": 10735, "olds": 10736, "aja": 10737, "ĠSad": 10738, "Ġclicking": 10739, "Ġbids": 10740, "ĠZuckerberg": 10741, "Ġ900": 10742, "Ġexam": 10743, "ivers": 10744, "Ġpray": 10745, "Ġreader": 10746, "ĠSeth": 10747, "inem": 10748, "Ġconfront": 10749, "stra": 10750, "AW": 10751, "ĠGian": 10752, "Ġaccordance": 10753, "Ġinteract": 10754, "ĠSharks": 10755, "Ġfireworks": 10756, "gment": 10757, "illy": 10758, "Ġconst": 10759, "ARY": 10760, "Ġprizes": 10761, "Ġshoulders": 10762, "Ġaccessed": 10763, "Ġecosystem": 10764, "Ġlicensing": 10765, "La": 10766, "Ġdedication": 10767, "ĠdÃ©": 10768, "Ġyouths": 10769, "lem": 10770, "Ġtoy": 10771, "ĠProm": 10772, "ounding": 10773, "rod": 10774, "Ġ1000": 10775, "ishes": 10776, "Over": 10777, "Ġgaps": 10778, "Ġmissions": 10779, "Ġrailway": 10780, "Day": 10781, "orp": 10782, "ĠSchumer": 10783, "Ġeclipse": 10784, "Ġshell": 10785, "ĠBY": 10786, "Many": 10787, "ĠRecord": 10788, "Ġdrunk": 10789, "ayan": 10790, "Ġsuggestion": 10791, "Ġdefenders": 10792, "ĠNewton": 10793, "Ġdisputes": 10794, "Ġevolution": 10795, "Ġcredibility": 10796, "ĠTenn": 10797, "Ġplain": 10798, "size": 10799, "cont": 10800, "Ġlone": 10801, "Ġfingers": 10802, "BUR": 10803, "ĠInvestigation": 10804, "ĠQualcomm": 10805, "var": 10806, "Ġcountless": 10807, "ĠRebecca": 10808, "½": 10809, "abi": 10810, "Ġreflecting": 10811, "ĠTurn": 10812, "Ġinteractive": 10813, "Ġincentive": 10814, "second": 10815, "offs": 10816, "ĠBerkeley": 10817, "ĠTexans": 10818, "Ġheated": 10819, "Ġscorer": 10820, "ĠSharif": 10821, "Ġmigrant": 10822, "west": 10823, "ĠHoliday": 10824, "Ġwrist": 10825, "Ġchairs": 10826, "Ġrecommends": 10827, "ĠWildcats": 10828, "ĠPed": 10829, "ĠQuarter": 10830, "ĠIV": 10831, "ĠArch": 10832, "Ġstandings": 10833, "Ġbombs": 10834, "Ġcapped": 10835, "Can": 10836, "Ġcaring": 10837, "ĠLah": 10838, "lim": 10839, "Ġdragged": 10840, "ĠBeat": 10841, "DB": 10842, "Ġaired": 10843, "Ġjeans": 10844, "action": 10845, "Ġgenerating": 10846, "ĠGir": 10847, "risk": 10848, "lon": 10849, "stage": 10850, "âĤ¬": 10851, "earing": 10852, "ĠTogether": 10853, "Ġreun": 10854, "ĠCorey": 10855, "ĠBak": 10856, "Ġprestigious": 10857, "Ġapplicants": 10858, "here": 10859, "ĠMattis": 10860, "Ġridiculous": 10861, "ĠLess": 10862, "Ġrains": 10863, "Ġpresenting": 10864, "anti": 10865, "Ġdisabilities": 10866, "Ġapartments": 10867, "storm": 10868, "ĠHem": 10869, "Ġhabit": 10870, "ĠRuth": 10871, "ĠNPR": 10872, "nut": 10873, "Ġappreciated": 10874, "Ġseparation": 10875, "uda": 10876, "Ġminus": 10877, "ĠPhotos": 10878, "Ġblew": 10879, "ĠVoice": 10880, "Ġrallies": 10881, "Ġfond": 10882, "ĠTaking": 10883, "yt": 10884, "FE": 10885, "ĠTory": 10886, "ressed": 10887, "ĠLy": 10888, "Ġrocks": 10889, "ĠRah": 10890, "Ġelementary": 10891, "nis": 10892, "ĠPresidential": 10893, "Ġnutrition": 10894, "Ġbaseman": 10895, "Ġsuperstar": 10896, "ĠWa": 10897, "lar": 10898, "Ġstaged": 10899, "ĠLearn": 10900, "Ġbroadcaster": 10901, "Ġboasts": 10902, "Ġdoubts": 10903, "rum": 10904, "Ġbare": 10905, "cap": 10906, "Ġclimbing": 10907, "ĠSelect": 10908, "ĠCant": 10909, "ĠNord": 10910, "ĠBeck": 10911, "ĠKad": 10912, "ello": 10913, "Ġenforce": 10914, "ĠZe": 10915, "ked": 10916, "elly": 10917, "ĠLED": 10918, "ĠOperations": 10919, "ĠLuk": 10920, "Ġcertificate": 10921, "Ġdeter": 10922, "Ġspill": 10923, "Ġgrain": 10924, "league": 10925, "Up": 10926, "ĠKid": 10927, "using": 10928, "ĠJays": 10929, "Ġoccasionally": 10930, "ĠMI": 10931, "yes": 10932, "Ġdetect": 10933, "Ġpropaganda": 10934, "Ġneighboring": 10935, "sub": 10936, "avan": 10937, "ĠAstros": 10938, "oti": 10939, "threatening": 10940, "Ġshorter": 10941, "INGS": 10942, "Ġfeeding": 10943, "Ġelevated": 10944, "ĠWenger": 10945, "Ġundergo": 10946, "Ġpsychological": 10947, "Ġautom": 10948, "NP": 10949, "anks": 10950, "ĠNokia": 10951, "Ġdrones": 10952, "Ġrecognised": 10953, "Ġheroes": 10954, "agen": 10955, "Ġparole": 10956, "ĠBah": 10957, "Ġhomeowners": 10958, "ĠSweet": 10959, "Ġinstances": 10960, "ĠParish": 10961, "ĠSL": 10962, "Ġunw": 10963, "Ġdelicious": 10964, "¯": 10965, "ĠInvestments": 10966, "ĠPhilippine": 10967, "inos": 10968, "Ġmes": 10969, "Ġbite": 10970, "Ġcornerback": 10971, "ĠHat": 10972, "Ġdeserved": 10973, "ologists": 10974, "[": 10975, "Ġwrongdoing": 10976, "ĠTrent": 10977, "ĠVe": 10978, "ĠDeal": 10979, "Mr": 10980, "Ġovers": 10981, "Ġhonors": 10982, "ĠITV": 10983, "Ġpayroll": 10984, "Ġconfused": 10985, "Ġelaborate": 10986, "ange": 10987, "World": 10988, "ĠResort": 10989, "ilia": 10990, "ĠKr": 10991, "Ġconclude": 10992, "First": 10993, "ĠDR": 10994, "Ġpeer": 10995, "Ġrunway": 10996, "ĠPotter": 10997, "cons": 10998, "bad": 10999, "si": 11000, "ĠClimate": 11001, "ĠHoll": 11002, "Ġweighing": 11003, "Ġepidemic": 11004, "ĠBible": 11005, "Ġhon": 11006, "Ġrenew": 11007, "Ġgambling": 11008, "ĠNationals": 11009, "itable": 11010, "ĠOutlook": 11011, "Ġreactions": 11012, "ĠCos": 11013, "ĠDana": 11014, "India": 11015, "ĠAirbus": 11016, "power": 11017, "watch": 11018, "Ġstyles": 11019, "Ġordinance": 11020, "Ġcam": 11021, "Ġinvent": 11022, "ĠDurant": 11023, "Ġexchanged": 11024, "Ġyoga": 11025, "ĠMichel": 11026, "ĠWyoming": 11027, "ĠPhase": 11028, "ĠHannah": 11029, "Ġtem": 11030, "Ġfare": 11031, "omer": 11032, "Ġtrails": 11033, "Ġquietly": 11034, "ĠFourth": 11035, "Ġwise": 11036, "Ġappetite": 11037, "Ġpedestrian": 11038, "Ġfierce": 11039, "hin": 11040, "ako": 11041, "Ġvacant": 11042, "Ġdynamics": 11043, "Ġbust": 11044, "ĠGT": 11045, "century": 11046, "Ġpermitted": 11047, "Ġfog": 11048, "Ġrecruitment": 11049, "ĠDue": 11050, "Ġbro": 11051, "Ġsil": 11052, "ĠOpp": 11053, "Ġphrase": 11054, "ĠChip": 11055, "ĠBase": 11056, "Ġjazz": 11057, "Ġenemies": 11058, "Ġremainder": 11059, "bles": 11060, "Ġ105": 11061, "ĠGur": 11062, "Ġretiring": 11063, "ĠCour": 11064, "ĠSi": 11065, "Ġinevitable": 11066, "ĠAdvisory": 11067, "ĠCampaign": 11068, "ĠPeninsula": 11069, "base": 11070, "Ġjustify": 11071, "inen": 11072, "North": 11073, "Ġfreezing": 11074, "Ġphotography": 11075, "Ġappointments": 11076, "ĠTree": 11077, "Os": 11078, "Ġdivide": 11079, "ĠMMA": 11080, "Ġdeclines": 11081, "ĠAbbott": 11082, "ACH": 11083, "ĠJah": 11084, "Ġspr": 11085, "Ġskilled": 11086, "ĠTry": 11087, "ANT": 11088, "ael": 11089, "ĠMcN": 11090, "Ġtariff": 11091, "generation": 11092, "ĠMans": 11093, "Or": 11094, "Ġraped": 11095, "Ġdisability": 11096, "Ġnominations": 11097, "Ġhappiness": 11098, "ĠLSU": 11099, "ĠInterstate": 11100, "ĠDance": 11101, "ĠMaking": 11102, "Ġbailout": 11103, "oro": 11104, "ĠObviously": 11105, "Ġinbox": 11106, "football": 11107, "hy": 11108, "ĠCase": 11109, "Ġentertaining": 11110, "Ġhardest": 11111, "ĠOpposition": 11112, "Ġflip": 11113, "ĠPirates": 11114, "anu": 11115, "ĠKlopp": 11116, "Ġballistic": 11117, "Ġprinted": 11118, "ĠNFC": 11119, "UST": 11120, "Ġglasses": 11121, "Ġrum": 11122, "ĠDuncan": 11123, "hal": 11124, "Ġpreview": 11125, "BER": 11126, "dec": 11127, "Ġsustainability": 11128, "Ġaff": 11129, "Ġhungry": 11130, "service": 11131, "avi": 11132, "Ġsometime": 11133, "Ġmod": 11134, "ĠLib": 11135, "oko": 11136, "Ġfundraiser": 11137, "Ġcrowded": 11138, "mates": 11139, "Ġcreativity": 11140, "ĠHell": 11141, "Ġtreaty": 11142, "ĠSoftware": 11143, "ĠRandy": 11144, "ĠPolish": 11145, "sa": 11146, "ardi": 11147, "Ġcab": 11148, "ĠCamera": 11149, "Ġlicenses": 11150, "Ġ1988": 11151, "Ġcontinuous": 11152, "Ġpaired": 11153, "Ġtally": 11154, "Ġgrip": 11155, "cho": 11156, "Ġsurged": 11157, "Ġpodium": 11158, "Ġcontrary": 11159, "SL": 11160, "ĠResearchers": 11161, "cing": 11162, "Ġmi": 11163, "Ġdisputed": 11164, "Ġgrades": 11165, "Ġseverely": 11166, "ĠMcL": 11167, "ondo": 11168, "Ġshelters": 11169, "Ġdomain": 11170, "ĠSwitch": 11171, "Ġtestify": 11172, "case": 11173, "omet": 11174, "atch": 11175, "ĠAff": 11176, "Ġcasting": 11177, "berger": 11178, "Ġintimate": 11179, "erc": 11180, "plan": 11181, "ĠPast": 11182, "ĠUt": 11183, "Ġapologized": 11184, "ĠDet": 11185, "alle": 11186, "Ġwhilst": 11187, "Ġpel": 11188, "Ġexecute": 11189, "Ġharmful": 11190, "ĠRB": 11191, "onda": 11192, "ĠFul": 11193, "II": 11194, "Those": 11195, "Ġcryptocurrency": 11196, "Ġrealise": 11197, "ĠAthens": 11198, "ĠApplication": 11199, "ORD": 11200, "Ġmidst": 11201, "ĠSem": 11202, "Ġmessaging": 11203, "Ġcousin": 11204, "ĠMarsh": 11205, "ĠAlmost": 11206, "uto": 11207, "wire": 11208, "ĠManaging": 11209, "Ġsends": 11210, "ĠDerby": 11211, "Ġpad": 11212, "Ġdevoted": 11213, "ĠWorking": 11214, "ĠWestminster": 11215, "Ġdirty": 11216, "ements": 11217, "ĠLew": 11218, "door": 11219, "Ġadvisor": 11220, "ival": 11221, "Ġsubscribe": 11222, "Ġcredited": 11223, "Ġpressed": 11224, "Ġbrick": 11225, "Ġrehabilitation": 11226, "Ġ\"[": 11227, "erry": 11228, "Ġtransformed": 11229, "arp": 11230, "Ġreceivers": 11231, "ĠFan": 11232, "ĠKris": 11233, "ĠCharlottesville": 11234, "Ġste": 11235, "Ġconstructed": 11236, "Ġbroadly": 11237, "ĠBetter": 11238, "ĠJanet": 11239, "Ġenthusiasm": 11240, "ĠIrving": 11241, "ĠConst": 11242, "Everyone": 11243, "agn": 11244, "ĠCrawford": 11245, "Ġregards": 11246, "ĠBurns": 11247, "Ġjokes": 11248, "erg": 11249, "ARD": 11250, "apped": 11251, "Ġtravelled": 11252, "ĠPoor": 11253, "ĠHolly": 11254, "Ġcontainer": 11255, "Ġinfected": 11256, "Ġlean": 11257, "ĠWould": 11258, "Ġmagnitude": 11259, "ĠDou": 11260, "minded": 11261, "Ġpastor": 11262, "Ġwherever": 11263, "ulation": 11264, "Ġ1986": 11265, "ĠMegan": 11266, "Ġgraphic": 11267, "Ġtalents": 11268, "Ġkn": 11269, "ĠEC": 11270, "ĠMcM": 11271, "ĠKon": 11272, "eni": 11273, "ĠEsc": 11274, "inas": 11275, "ĠNom": 11276, "Ġchasing": 11277, "arl": 11278, "ĠHungary": 11279, "Ġmainland": 11280, "ĠDist": 11281, "utes": 11282, "Ġrubber": 11283, "iat": 11284, "ĠMorrison": 11285, "ushing": 11286, "iny": 11287, "Ġcopies": 11288, "ĠFat": 11289, "agged": 11290, "Ġfloating": 11291, "ĠCurtis": 11292, "Ġfatally": 11293, "ĠManuel": 11294, "Ġgraduates": 11295, "nar": 11296, "ĠKenny": 11297, "Ġretreat": 11298, "Ġretro": 11299, "ĠPierre": 11300, "listed": 11301, "ĠDale": 11302, "ding": 11303, "Ġintentions": 11304, "Ġsentences": 11305, "ĠSere": 11306, "Ġinvasion": 11307, "Ġpremiums": 11308, "ĠGardner": 11309, "Ġshipments": 11310, "Ġcol": 11311, "bell": 11312, "ilo": 11313, "Ġworthy": 11314, "Ġinterceptions": 11315, "Ġcomplain": 11316, "icle": 11317, "ĠTah": 11318, "ĠMt": 11319, "ĠSyracuse": 11320, "Since": 11321, "aches": 11322, "ĠCand": 11323, "Ġinteractions": 11324, "ĠShawn": 11325, "nc": 11326, "Ġtheaters": 11327, "ART": 11328, "Th": 11329, "Ġalter": 11330, "aley": 11331, "imo": 11332, "Ġresponders": 11333, "kan": 11334, "ĠDarren": 11335, "Ġdeliveries": 11336, "PI": 11337, "125": 11338, "Ġlaughing": 11339, "ĠPatterson": 11340, "Ġinfections": 11341, "Ġtur": 11342, "130": 11343, "Ġhackers": 11344, "Ġwarn": 11345, "Ġfreeze": 11346, "Ġscreaming": 11347, "ĠEcho": 11348, "ĠDom": 11349, "MAN": 11350, "ĠJoy": 11351, "Ġbeneath": 11352, "ĠHalf": 11353, "Ġpatent": 11354, "Ġugly": 11355, "Ġlip": 11356, "Ġnominees": 11357, "ĠGrade": 11358, "Ġinfluenced": 11359, "Ġabilities": 11360, "Ġlimiting": 11361, "Ġsmell": 11362, "Ġesc": 11363, "ĠBernard": 11364, "cs": 11365, "ĠMyers": 11366, "oted": 11367, "Black": 11368, "Ġlim": 11369, "Ġsworn": 11370, "ĠBlair": 11371, "anes": 11372, "ĠEvent": 11373, "Ġmature": 11374, "Ġpositioned": 11375, "Ġerupted": 11376, "grand": 11377, "ĠTell": 11378, "Ġbackdrop": 11379, "Ġyeah": 11380, "ĠClear": 11381, "Ġsignificance": 11382, "Ġpatience": 11383, "ĠWing": 11384, "Ġhorrible": 11385, "Ġdeploy": 11386, "ipe": 11387, "Ġbitcoin": 11388, "Ġcommitting": 11389, "Ġdismiss": 11390, "ĠBlood": 11391, "ĠMeyer": 11392, "selling": 11393, "Ġregarded": 11394, "Ġlottery": 11395, "ĠLuther": 11396, "Ġpipe": 11397, "Ġcro": 11398, "ĠANC": 11399, "ĠSolar": 11400, "Ġsimilarly": 11401, "Ġham": 11402, "ĠHonor": 11403, "tar": 11404, "gin": 11405, "ĠArmstrong": 11406, "Ġbrowser": 11407, "agon": 11408, "via": 11409, "Ġentries": 11410, "Ġinfl": 11411, "Ġgraduation": 11412, "Ġalleges": 11413, "ĠLoading": 11414, "Ġsuperb": 11415, "ially": 11416, "Ġadministrator": 11417, "uls": 11418, "Ġartistic": 11419, "ĠANGEL": 11420, "ĠBang": 11421, "Ġfossil": 11422, "¨": 11423, "Ġpoly": 11424, "ĠGuardiola": 11425, "ĠPerth": 11426, "Ġeducate": 11427, "Cl": 11428, "Ġcommittees": 11429, "Ġforthcoming": 11430, "Ġadjustments": 11431, "count": 11432, "Ġincoming": 11433, "brook": 11434, "ĠMinneapolis": 11435, "Ġgown": 11436, "ĠCroatia": 11437, "host": 11438, "Ġcompetitor": 11439, "Ġlyrics": 11440, "Ġbelonging": 11441, "ĠFrances": 11442, "ĠHaley": 11443, "ĠBruins": 11444, "Ġmask": 11445, "ĠPv": 11446, "dollar": 11447, "Ġbowling": 11448, "Ġjewelry": 11449, "ĠJulia": 11450, "Ġbroadband": 11451, "ĠBhar": 11452, "ĠArmed": 11453, "vy": 11454, "government": 11455, "kov": 11456, "Ġpremises": 11457, "Ġjersey": 11458, "Ġapplies": 11459, "ĠFreeman": 11460, "Ġgrows": 11461, "ĠEquity": 11462, "Ġmaterially": 11463, "Ġfigured": 11464, "ience": 11465, "Ġmajors": 11466, "ĠYe": 11467, "ĠHey": 11468, "oned": 11469, "aping": 11470, "Ġtoilet": 11471, "ĠConnor": 11472, "Ġavoiding": 11473, "pos": 11474, "Once": 11475, "ĠRockets": 11476, "ĠSnapchat": 11477, "Go": 11478, "Ġsolidarity": 11479, "ĠAffordable": 11480, "Ġdial": 11481, "ĠOmar": 11482, "xt": 11483, "ĠVatican": 11484, "anta": 11485, "ĠSuperior": 11486, "Ġbeaches": 11487, "ĠKi": 11488, "Ã¥": 11489, "KY": 11490, "Ġgro": 11491, "ĠEmpire": 11492, "Ġoccurs": 11493, "Ġjoked": 11494, "Ġquotes": 11495, "ĠSaskatchewan": 11496, "pert": 11497, "Ġmaintains": 11498, "olt": 11499, "Ġupgrades": 11500, "ĠCho": 11501, "ĠAlexis": 11502, "ĠHundreds": 11503, "ĠBud": 11504, "Ġcenturies": 11505, "ĠInvestor": 11506, "ĠGomez": 11507, "Ġconceded": 11508, "Ġexpressing": 11509, "ĠIBM": 11510, "Ġadvancing": 11511, "ĠDollar": 11512, "jer": 11513, "Ġexceed": 11514, "author": 11515, "rist": 11516, "seat": 11517, "ĠPrimary": 11518, "ĠForbes": 11519, "ĠAlzheimer": 11520, "Ġdevastated": 11521, "Ġawful": 11522, "ĠStudio": 11523, "Ġbullpen": 11524, "Ġmobility": 11525, "Ġanalyze": 11526, "lie": 11527, "AFP": 11528, "iche": 11529, "ĠRoyals": 11530, "Ġcoupled": 11531, "Ġdug": 11532, "ĠRing": 11533, "Ġenvironments": 11534, "national": 11535, "ĠCongo": 11536, "Ġalleging": 11537, "wn": 11538, "ulating": 11539, "Ġur": 11540, "Ġreaches": 11541, "ĠPine": 11542, "Ġthreshold": 11543, "Ġtournaments": 11544, "Ġheating": 11545, "ĠGard": 11546, "ĠHamas": 11547, "ĠÂ«": 11548, "ĠHolding": 11549, "Ġpossibilities": 11550, "ĠHassan": 11551, "ĠMohammad": 11552, "Ġoffenders": 11553, "Ġautomated": 11554, "Ġrealised": 11555, "ouse": 11556, "building": 11557, "ĠDub": 11558, "ĠGeneva": 11559, "Ġfacial": 11560, "ĠRestaurant": 11561, "ĠNg": 11562, "Ġtot": 11563, "Ġgrace": 11564, "ĠCP": 11565, "Ġposter": 11566, "hart": 11567, "ĠNi": 11568, "Ġreaff": 11569, "Ġprov": 11570, "Ġ111": 11571, "ĠAid": 11572, "Ġscrap": 11573, "izers": 11574, "ogen": 11575, "Ġtissue": 11576, "Ġvibrant": 11577, "Ġrider": 11578, "CD": 11579, "ĠKitchen": 11580, "Ġgenre": 11581, "¬": 11582, "depth": 11583, "kind": 11584, "Ġendorsed": 11585, "Ġsimultaneously": 11586, "Ġintern": 11587, "ĠDrag": 11588, "Ġembraced": 11589, "Ġcounted": 11590, "uj": 11591, "ĠOg": 11592, "Ġphysician": 11593, "ĠIR": 11594, "IST": 11595, "ĠKir": 11596, "Ġhacking": 11597, "ĠSources": 11598, "astic": 11599, "growing": 11600, "ĠWake": 11601, "Ġhint": 11602, "Ġcompiled": 11603, "Ġreign": 11604, "Ġcinema": 11605, "Ġboosting": 11606, "Ġaccommodation": 11607, "ĠEuropa": 11608, "Ġsubsidiaries": 11609, "Ġclosures": 11610, "ĠBil": 11611, "ĠBou": 11612, "wh": 11613, "ĠAw": 11614, "FT": 11615, "hole": 11616, "ĠNova": 11617, "ĠNSW": 11618, "Ġrap": 11619, "Ġencourages": 11620, "GR": 11621, "ds": 11622, "ĠMuk": 11623, "ĠSurvey": 11624, "ĠReagan": 11625, "oning": 11626, "Ġneighbouring": 11627, "ĠMcCl": 11628, "acht": 11629, "Ġfinishes": 11630, "ĠEsp": 11631, "pat": 11632, "Ġdestinations": 11633, "ĠWagner": 11634, "Ġconfronted": 11635, "square": 11636, "Ġpie": 11637, "brand": 11638, "hl": 11639, "Ġabsent": 11640, "Ġsurf": 11641, "Ġrifle": 11642, "ĠSS": 11643, "ĠDeath": 11644, "wich": 11645, "Ġbeds": 11646, "ĠLock": 11647, "ĠAgu": 11648, "atives": 11649, "jee": 11650, "Ġoral": 11651, "Ġbudgets": 11652, "Ġinspiring": 11653, "IONS": 11654, "works": 11655, "Ġspirits": 11656, "Ġcabin": 11657, "Ġsatisfaction": 11658, "Ġvoluntary": 11659, "ĠMunicipal": 11660, "Ġdeportation": 11661, "ĠWriter": 11662, "ĠVI": 11663, "VERTISEMENT": 11664, "/.": 11665, "ĠSouthampton": 11666, "aces": 11667, "ĠHelen": 11668, "ĠHum": 11669, "110": 11670, "Ġgarbage": 11671, "through": 11672, "Ġkingdom": 11673, "MT": 11674, "augh": 11675, "Ġbizarre": 11676, "ĠStarting": 11677, "Ġwooden": 11678, "ĠProgress": 11679, "iron": 11680, "sten": 11681, "ĠSergio": 11682, "ĠHR": 11683, "Ġturnout": 11684, "ĠAmericas": 11685, "ĠSara": 11686, "Ġagrees": 11687, "apper": 11688, "Ġbra": 11689, "Ġrecycling": 11690, "oom": 11691, "Ġflee": 11692, "Ġdistinct": 11693, "IAL": 11694, "aha": 11695, "Ġfever": 11696, "ĠPartnership": 11697, "ĠYu": 11698, "ĠPixel": 11699, "ĠBlock": 11700, "ĠMelissa": 11701, "igg": 11702, "Ġdecides": 11703, "ĠNorman": 11704, "Ġmas": 11705, "held": 11706, "ĠPD": 11707, "Ġsheer": 11708, "ĠDim": 11709, "ĠCass": 11710, "Ġcolumnist": 11711, "ĠBros": 11712, "Ġturnaround": 11713, "ĠValue": 11714, "ĠBachelor": 11715, "awn": 11716, "Ġassignment": 11717, "ested": 11718, "ĠJudiciary": 11719, "Ġdiamond": 11720, "Ġmus": 11721, "Ġindigenous": 11722, "lines": 11723, "Ġ1984": 11724, "igroup": 11725, "ict": 11726, "ĠJaguars": 11727, "Ġlun": 11728, "Ġprofiles": 11729, "Ġcomputing": 11730, "ĠBelgian": 11731, "ĠLloyd": 11732, "ĠGoing": 11733, "Ġdisp": 11734, "Ġ1987": 11735, "eder": 11736, "ĠVin": 11737, "Ġgovern": 11738, "Ġblend": 11739, "ĠSebastian": 11740, "ĠMidwest": 11741, "iga": 11742, "Ġspl": 11743, "Ġtopping": 11744, "Ġnetworking": 11745, "ĠEmer": 11746, "Ġoxygen": 11747, "ĠInterest": 11748, "ĠMoy": 11749, "Ġtrader": 11750, "Ġbay": 11751, "Ġsticking": 11752, "ĠMovement": 11753, "Ġbidding": 11754, "tax": 11755, "Ġacademy": 11756, "ĠMO": 11757, "ĠSpirit": 11758, "Ġhealing": 11759, "wen": 11760, "ĠPrix": 11761, "cal": 11762, "ĠOperating": 11763, "Ġinstantly": 11764, "ĠTonight": 11765, "Ġsacked": 11766, "Ġautomation": 11767, "umps": 11768, "ĠNey": 11769, "March": 11770, "ĠBuck": 11771, "Ġconcentration": 11772, "Here": 11773, "Ġtravelers": 11774, "Ġprotective": 11775, "ĠMoody": 11776, "Ġentrepreneur": 11777, "Ġfac": 11778, "kowski": 11779, "Ġpreparations": 11780, "Ġdominate": 11781, "Ġspray": 11782, "Ġdisturbing": 11783, "ĠFraser": 11784, "ĠCody": 11785, "ashi": 11786, "ĠPel": 11787, "Ġrisky": 11788, "Ġawkward": 11789, "ĠVA": 11790, "ails": 11791, "Ġangle": 11792, "Ġundergoing": 11793, "Ġalbums": 11794, "Ġafterwards": 11795, "ĠNaw": 11796, "uge": 11797, "enter": 11798, "ĠSussex": 11799, "ĠRecently": 11800, "Ġlikelihood": 11801, "large": 11802, "Ġsnaps": 11803, "ibr": 11804, "ĠMalcolm": 11805, "Ġcru": 11806, "Ġaltogether": 11807, "Ġsetup": 11808, "Ġtorture": 11809, "Ġfiber": 11810, "Ġquarterbacks": 11811, "ĠGetting": 11812, "ipping": 11813, "ĠNorwegian": 11814, "ĠMiles": 11815, "ĠArnold": 11816, "ĠDisease": 11817, "Ġtends": 11818, "ife": 11819, "ĠCaroline": 11820, "Ġnavigate": 11821, "Ġbrush": 11822, "ĠAssociates": 11823, "Ġbath": 11824, "ĠCenters": 11825, "ĠMC": 11826, "Ġtaxpayer": 11827, "comp": 11828, "Ġaccomplish": 11829, "ĠTraffic": 11830, "ĠBru": 11831, "Ġgreenhouse": 11832, "ĠMalaysian": 11833, "ĠPur": 11834, "ased": 11835, "ĠKnicks": 11836, "aters": 11837, "Ġalt": 11838, "ICK": 11839, "Ġcalculations": 11840, "Ġmindset": 11841, "unch": 11842, "Ġgu": 11843, "Ġsteadily": 11844, "Ġfiction": 11845, "ĠPap": 11846, "forming": 11847, "ĠActor": 11848, "ĠBerry": 11849, "imp": 11850, "ĠUpper": 11851, "Ġassessed": 11852, "Ġlawn": 11853, "ĠRoh": 11854, "Ġclearance": 11855, "funded": 11856, "Ġpret": 11857, "ĠHom": 11858, "VS": 11859, "ĠTourism": 11860, "ĠRy": 11861, "ĠGonz": 11862, "ĠStudios": 11863, "Ġanchor": 11864, "Ġrecognise": 11865, "Ġcooperate": 11866, "enny": 11867, "aza": 11868, "ĠMeet": 11869, "Ġeventual": 11870, "SW": 11871, "ĠCounsel": 11872, "ĠSave": 11873, "Ġlucrative": 11874, "Ġslim": 11875, "ĠGreens": 11876, "Ġchemistry": 11877, "ĠSheikh": 11878, "Ġbridges": 11879, "business": 11880, "ĠSaf": 11881, "ĠGy": 11882, "Ġprotocol": 11883, "Ġnephew": 11884, "ĠBrands": 11885, "ĠCulture": 11886, "orship": 11887, "Ġ(Â£": 11888, "ĠDell": 11889, "astics": 11890, "Ġproving": 11891, "ĠMann": 11892, "aca": 11893, "Ġindoor": 11894, "ĠUganda": 11895, "ĠRomney": 11896, "ĠStage": 11897, "Ġward": 11898, "ĠAmber": 11899, "haw": 11900, "Ġtw": 11901, "Ġbullying": 11902, "ĠCAR": 11903, "Ġassociates": 11904, "ĠHopkins": 11905, "Ġsuburb": 11906, "Ġaggressively": 11907, "Ġpostponed": 11908, "Ġbas": 11909, "Ġburglary": 11910, "ĠFound": 11911, "Ġfloors": 11912, "Any": 11913, "Ġjam": 11914, "Ġvisibility": 11915, "Ġbenefited": 11916, "ĠAud": 11917, "aying": 11918, "iku": 11919, "ĠPas": 11920, "ĠGPS": 11921, "ĠOwens": 11922, "Ġreluctant": 11923, "ĠOlivia": 11924, "ols": 11925, "Ġemotion": 11926, "ĠHeavy": 11927, "Ġhostile": 11928, "Ġfavorites": 11929, "Ġfeat": 11930, "ĠCord": 11931, "ĠGO": 11932, "Ġindicted": 11933, "idal": 11934, "ĠIL": 11935, "Ħ": 11936, "acer": 11937, "ICH": 11938, "oda": 11939, "Ġrecipients": 11940, "Ġtribal": 11941, "Ġresist": 11942, "ĠCritics": 11943, "Ġsang": 11944, "ĠMath": 11945, "ĠBrighton": 11946, "ĠKw": 11947, "Ġlimitations": 11948, "Ġinterception": 11949, "onde": 11950, "ĠRobertson": 11951, "Ġenjoys": 11952, "site": 11953, "Ġwings": 11954, "ĠCeltic": 11955, "Ġrelaxed": 11956, "Share": 11957, "Ġwarrants": 11958, "oco": 11959, "Ġcritically": 11960, "GC": 11961, "Ġcute": 11962, "Ġlaying": 11963, "itude": 11964, "ĠMediterranean": 11965, "Ġwatches": 11966, "Ġdisagree": 11967, "ĠReturn": 11968, "ARC": 11969, "people": 11970, "Ġtwelve": 11971, "Ġoverdose": 11972, "ĠLot": 11973, "ĠFROM": 11974, "ĠPeters": 11975, "Ġadministrators": 11976, "Ġslam": 11977, "jar": 11978, "OH": 11979, "ĠInitiative": 11980, "Ġteamed": 11981, "ĠMajority": 11982, "June": 11983, "ĠPlaza": 11984, "lake": 11985, "Ġglimpse": 11986, "Ġrings": 11987, "Ġos": 11988, "Ġmentor": 11989, "have": 11990, "Ġlanguages": 11991, "Ġuncle": 11992, "agu": 11993, "ĠWine": 11994, "ĠCategory": 11995, "ĠIng": 11996, "Ġcontests": 11997, "ĠRosen": 11998, "ĠWhatever": 11999, "Ġdenying": 12000, "ean": 12001, "Ġspec": 12002, "Ġgrad": 12003, "Ġtenants": 12004, "show": 12005, "ĠGregory": 12006, "Ġcontention": 12007, "Ġunanimously": 12008, "ĠPin": 12009, "fa": 12010, "ĠPink": 12011, "Ġswitched": 12012, "acre": 12013, "ĠTrading": 12014, "VP": 12015, "ĠMaple": 12016, "Neill": 12017, "Ġdiscounts": 12018, "alls": 12019, "Ġsounded": 12020, "Ġrumours": 12021, "ĠCre": 12022, "hall": 12023, "ĠTele": 12024, "Ġthankful": 12025, "Ġsurveyed": 12026, "UB": 12027, "Ġdignity": 12028, "Ġnod": 12029, "Ġmisleading": 12030, "ĠTX": 12031, "ĠBurke": 12032, "Ġmounting": 12033, "Ġskies": 12034, "Ġbesides": 12035, "ĠGarrett": 12036, "tha": 12037, "Ġintelligent": 12038, "Ġtanks": 12039, "apping": 12040, "ĠRat": 12041, "aint": 12042, "Ġentertain": 12043, "ĠAbdullah": 12044, "Ġsink": 12045, "ĠLan": 12046, "ĠManufacturing": 12047, "NFL": 12048, "Ġthemes": 12049, "ĠHaven": 12050, "ĠDavies": 12051, "ĠKerr": 12052, "ĠLen": 12053, "Ġcourtroom": 12054, "Ġfailures": 12055, "Ġlately": 12056, "ĠElectronics": 12057, "Ġgorgeous": 12058, "Ġnotification": 12059, "Ġ2030": 12060, "aved": 12061, "Ġdeer": 12062, "economic": 12063, "ĠStatistics": 12064, "Ġconfrontation": 12065, "Ġgovernors": 12066, "ĠHaram": 12067, "ĠLGBTQ": 12068, "Ġprocessed": 12069, "ĠDuchess": 12070, "Ġdowns": 12071, "Ġpork": 12072, "Ġhumor": 12073, "ocese": 12074, "Ġneeding": 12075, "Ġmidterm": 12076, "ĠOval": 12077, "Ġcorners": 12078, "Ġtablets": 12079, "eds": 12080, "vere": 12081, "Ġattacker": 12082, "Paul": 12083, "pee": 12084, "ĠAlice": 12085, "Ġrenowned": 12086, "Ġ09": 12087, "ocking": 12088, "Ġcreditors": 12089, "ĠPedro": 12090, "ĠPhone": 12091, "Ġsurveys": 12092, "ĠWelsh": 12093, "Ġcow": 12094, "Ġbuilds": 12095, "Ġ000": 12096, "ĠAzerbaijan": 12097, "ĠYad": 12098, "Ġinfant": 12099, "Ġmotorists": 12100, "Ġpoorly": 12101, "Ġmedications": 12102, "Ġstupid": 12103, "ĠCastro": 12104, "user": 12105, "antly": 12106, "alty": 12107, "ĠCond": 12108, "issa": 12109, "ĠIvan": 12110, "Ġcostume": 12111, "Ġ08": 12112, "Ġhence": 12113, "Ġdangers": 12114, "Ġbullish": 12115, "Life": 12116, "Ġflavor": 12117, "ĠCharleston": 12118, "Ġbikes": 12119, "Ġworkshops": 12120, "Ġarranged": 12121, "Ġcontender": 12122, "Ġsequel": 12123, "ĠPlant": 12124, "Ġdonor": 12125, "Ġfactories": 12126, "rict": 12127, "ellen": 12128, "Ġrobots": 12129, "ĠWor": 12130, "ĠDirectors": 12131, "ĠPeru": 12132, "Ġqueen": 12133, "ĠTimothy": 12134, "ĠToo": 12135, "Ġobservers": 12136, "Ġears": 12137, "Ġbel": 12138, "link": 12139, "uns": 12140, "Ġhomers": 12141, "Ġadjacent": 12142, "Ġconfidential": 12143, "Ġstunned": 12144, "iden": 12145, "illed": 12146, "ESS": 12147, "Ġconvenient": 12148, "ĠLindsey": 12149, "por": 12150, "upp": 12151, "Ġborrow": 12152, "ĠAhmad": 12153, "ORT": 12154, "Ġrelate": 12155, "ĠSelf": 12156, "ĠVanguard": 12157, "utter": 12158, "ĠBranch": 12159, "ĠBolton": 12160, "bat": 12161, "Ġoutright": 12162, "fighters": 12163, "ĠBed": 12164, "Ġpes": 12165, "inski": 12166, "Ġgunshot": 12167, "Ġprinting": 12168, "ĠSent": 12169, "vern": 12170, "Ġharvest": 12171, "Ġbubble": 12172, "Ġrefund": 12173, "Ġfuels": 12174, "Ġdive": 12175, "Ġdiplomat": 12176, "Ġpile": 12177, "ĠVery": 12178, "rot": 12179, "ĠSearch": 12180, "ĠJoyce": 12181, "ĠPruitt": 12182, "ĠLevel": 12183, "ĠBP": 12184, "ĠLac": 12185, "had": 12186, "Ġexpenditure": 12187, "ĠMadd": 12188, "Ġpockets": 12189, "ĠClippers": 12190, "ĠDear": 12191, "ĠGive": 12192, "Ġhal": 12193, "Ġvertical": 12194, "Ġwholesale": 12195, "what": 12196, "ĠSpringfield": 12197, "ayed": 12198, "ĠSom": 12199, "Ġsecrets": 12200, "Ġcharts": 12201, "iar": 12202, "ibility": 12203, "LAND": 12204, "Ġbearing": 12205, "Ġprom": 12206, "Ġtab": 12207, "Ġsheets": 12208, "ĠGL": 12209, "Ġendless": 12210, "opening": 12211, "ĠOwen": 12212, "Ġunderneath": 12213, "ĠErik": 12214, "ĠDACA": 12215, "Ġsteering": 12216, "Ġfootprint": 12217, "ĠRoma": 12218, "ĠDucks": 12219, "ĠEllen": 12220, "ĠProfessional": 12221, "ĠGardens": 12222, "Ġgoalie": 12223, "Ġshine": 12224, "Ġturmoil": 12225, "Ġhunger": 12226, "ĠâĢĭ": 12227, "active": 12228, "hey": 12229, "Ġblessed": 12230, "ason": 12231, "oping": 12232, "ĠThousands": 12233, "Ġdose": 12234, "ĠLor": 12235, "Ġevolved": 12236, "Ġcharities": 12237, "ĠPE": 12238, "ĠRub": 12239, "ws": 12240, "Ġmist": 12241, "ĠShen": 12242, "Ġbiological": 12243, "ĠTweet": 12244, "Ġcollections": 12245, "Ġsubstantially": 12246, "inner": 12247, "Ġbattled": 12248, "ĠCong": 12249, "Hold": 12250, "wp": 12251, "Ġwells": 12252, "Ġsake": 12253, "Ġunrest": 12254, "ĠKurt": 12255, "Ġripped": 12256, "itation": 12257, "Ġneighbourhood": 12258, "Ġinv": 12259, "Ġcad": 12260, "ĠCuban": 12261, "ĠWealth": 12262, "Ġtuition": 12263, "Ġdeclaring": 12264, "sch": 12265, "orne": 12266, "Ġwondered": 12267, "ĠChaff": 12268, "Ġdealer": 12269, "ĠNumber": 12270, "Mobile": 12271, "Ġscratch": 12272, "Ġprepares": 12273, "ĠSens": 12274, "ĠIstanbul": 12275, "ĠPanama": 12276, "ĠCay": 12277, "Ġallocation": 12278, "itutional": 12279, "Ġhar": 12280, "ĠNazi": 12281, "ĠSund": 12282, "Ġwarehouse": 12283, "Ġbackyard": 12284, "ĠIll": 12285, "Ġunlawful": 12286, "ĠReform": 12287, "Ġbasement": 12288, "ĠHi": 12289, "ĠPictures": 12290, "Ġtransfers": 12291, "ĠSell": 12292, "Ġfluid": 12293, "Ġambitions": 12294, "wife": 12295, "Ġintensive": 12296, "Ġsteals": 12297, "Ġfestive": 12298, "ĠHayes": 12299, "Ġrestoration": 12300, "Ġbranded": 12301, "Journal": 12302, "Ġmacro": 12303, "Ġconsole": 12304, "ĠMelania": 12305, "ĠRahul": 12306, "Ġdisposal": 12307, "Ġcult": 12308, "Ġpetrol": 12309, "Ġtires": 12310, "Ġkidnapping": 12311, "Ġ115": 12312, "Ġswap": 12313, "ĠSud": 12314, "Ġblown": 12315, "ĠHindu": 12316, "ĠBeckham": 12317, "ĠGul": 12318, "Ġfixture": 12319, "Ġwisdom": 12320, "Ġmines": 12321, "fort": 12322, "Ġrivers": 12323, "ĠCyber": 12324, "Ġtouches": 12325, "race": 12326, "Ġrelax": 12327, "Ġcrashes": 12328, "Ġconstituency": 12329, "Ġ1979": 12330, "Ġbureau": 12331, "Ġinterface": 12332, "Ġdetected": 12333, "ĠBio": 12334, "Ġhighlighting": 12335, "ames": 12336, "Ġcorresponding": 12337, "great": 12338, "Ġgray": 12339, "Ġadvantages": 12340, "ĠME": 12341, "ĠAbbas": 12342, "Ġnaked": 12343, "rington": 12344, ".),": 12345, "ĠFace": 12346, "third": 12347, "Ġtranscript": 12348, "ples": 12349, "Good": 12350, "ĠArctic": 12351, "Ġtolerance": 12352, "reat": 12353, "green": 12354, "ĠMik": 12355, "Ġoutreach": 12356, "Ġrolls": 12357, "Ġgen": 12358, "Ġsupplied": 12359, "Ġguarantees": 12360, "aug": 12361, "Ġsemif": 12362, "ounds": 12363, "running": 12364, "Ġfitting": 12365, "ĠRisk": 12366, "iveness": 12367, "family": 12368, "Ġti": 12369, "ĠIsaac": 12370, "Ġdump": 12371, "ĠPatricia": 12372, "Ġpassport": 12373, "ĠRhode": 12374, "Who": 12375, "log": 12376, "Ġstat": 12377, "Ġrat": 12378, "ango": 12379, "SB": 12380, "ĠMaur": 12381, "Ġsmiling": 12382, "Ġstrikeouts": 12383, "Ġpupils": 12384, "Ġcomplications": 12385, "ĠAdvanced": 12386, "ĠMonetary": 12387, "ĠTall": 12388, "ĠALL": 12389, "Ġcontributor": 12390, "ĠAdvertising": 12391, "Ġhorrific": 12392, "Ġcompeted": 12393, "ĠKenneth": 12394, "Ġhailed": 12395, "Ġbones": 12396, "Ġbolster": 12397, "ĠBoss": 12398, "Ġhospitalized": 12399, "ĠTelegraph": 12400, "ĠIndependence": 12401, "Ġdr": 12402, "ĠHang": 12403, "Ġdocumented": 12404, "Ġsubtle": 12405, "invest": 12406, "Ġbounced": 12407, "ĠMAN": 12408, "Ġprofession": 12409, "Ń": 12410, "Ġexcellence": 12411, "ĠInspector": 12412, "ĠBL": 12413, "Ġdisrupt": 12414, "ĠWinston": 12415, "ĠCommunist": 12416, "ĠSharon": 12417, "Ġmechanical": 12418, "Ġtreats": 12419, "Ġdesperately": 12420, "ĠIndy": 12421, "ĠGi": 12422, "ĠComposite": 12423, "ĠHeath": 12424, "aser": 12425, "ĠCardiff": 12426, "ilit": 12427, "Ġeased": 12428, "Ġprospective": 12429, "Ġcommissioned": 12430, "Ġtire": 12431, "Ġalign": 12432, "Ġgesture": 12433, "Ġweakened": 12434, "URE": 12435, "SN": 12436, "Ġnationals": 12437, "Ġrelies": 12438, "ĠIRS": 12439, "ĠCount": 12440, "Ġmedicines": 12441, "Ġcongress": 12442, "Ġstranger": 12443, "Qu": 12444, "lessly": 12445, "ĠQueens": 12446, "ĠAlleg": 12447, "uing": 12448, "ĠWy": 12449, "ĠMiguel": 12450, "idi": 12451, "Ġcivic": 12452, "ĠPetro": 12453, "endo": 12454, "Obviously": 12455, "Ġreflection": 12456, "ĠStop": 12457, "ĠFitzgerald": 12458, "placed": 12459, "shore": 12460, "Ġcorrectly": 12461, "ĠNE": 12462, "amy": 12463, "ĠCT": 12464, "some": 12465, "ĠMb": 12466, "oi": 12467, "ĠHogan": 12468, "ĠInnovation": 12469, "ĠVilla": 12470, "ĠCAN": 12471, "ĠCemetery": 12472, "into": 12473, "Ġquestionable": 12474, "Ġcreator": 12475, "rug": 12476, "Ġsemifinals": 12477, "mission": 12478, "Ġcle": 12479, "ĠWaters": 12480, "ĠNixon": 12481, "ĠBT": 12482, "Ġassuming": 12483, "ĠJer": 12484, "ĠClay": 12485, "pack": 12486, "ĠCool": 12487, "may": 12488, "Ġdecor": 12489, "Ġspike": 12490, "ĠSomalia": 12491, "ĠKarn": 12492, "ĠDamascus": 12493, "Shares": 12494, "Ġsus": 12495, "ĠMoss": 12496, "Ġ1985": 12497, "Ġsuperintendent": 12498, "ĠResults": 12499, "Ġspends": 12500, "prom": 12501, "Ġshipped": 12502, "Ġlaundering": 12503, "ĠLeslie": 12504, "Ġmeteor": 12505, "Ġabandon": 12506, "Ġdeliberately": 12507, "ĠSentinel": 12508, "Ġfascinating": 12509, "Ġenrollment": 12510, "ĠExperts": 12511, "ĠSimilarly": 12512, "ĠCuomo": 12513, "bor": 12514, "Ġune": 12515, "neutral": 12516, "Ġhamstring": 12517, "Ġnegotiated": 12518, "zes": 12519, "ĠLeo": 12520, "ĠDoctor": 12521, "Ġcurriculum": 12522, "ĠFocus": 12523, "Ġtravels": 12524, "Ġbeverage": 12525, "ĠIncluding": 12526, "tz": 12527, "type": 12528, "ĠRange": 12529, "Ġfloods": 12530, "Ġcoached": 12531, "Ġdominance": 12532, "letico": 12533, "ĠRafael": 12534, "Ġpredictions": 12535, "Ġprosperity": 12536, "ĠCav": 12537, "Ġclinics": 12538, "ĠBanking": 12539, "ĠComing": 12540, "ears": 12541, "ĠKaepernick": 12542, "ĠBlvd": 12543, "Ġretained": 12544, "isions": 12545, "Ġko": 12546, "Ġensemble": 12547, "Ġprecise": 12548, "Ġcompact": 12549, "MD": 12550, "ĠJet": 12551, "ached": 12552, "ĠTru": 12553, "ĠBass": 12554, "ĠIcon": 12555, "Ġexcluding": 12556, "sur": 12557, "Ġconstruct": 12558, "Ġvoiced": 12559, "pan": 12560, "Ġinability": 12561, "Ġexc": 12562, "Ġmate": 12563, "Ġtrailing": 12564, "Ġsuccessive": 12565, "Ġbets": 12566, "Ġgauge": 12567, "Ġminorities": 12568, "ĠIND": 12569, "ĠVel": 12570, "ĠGP": 12571, "oid": 12572, "bon": 12573, "Ġpred": 12574, "Ġdash": 12575, "Ġperformer": 12576, "Ġoccasional": 12577, "aken": 12578, "mes": 12579, "America": 12580, "Ġliver": 12581, "Sp": 12582, "Big": 12583, "Ġwildfires": 12584, "ĠJackie": 12585, "ĠLed": 12586, "ĠFinland": 12587, "Ġjurors": 12588, "olic": 12589, "urance": 12590, "ĠEdge": 12591, "open": 12592, "Ġscenarios": 12593, "Ġglory": 12594, "entry": 12595, "ĠCoffee": 12596, "rep": 12597, "ĠChand": 12598, "ĠVas": 12599, "ĠIslamabad": 12600, "Ġbur": 12601, "ĠFle": 12602, "ĠEdition": 12603, "Ġshoe": 12604, "ï¸ı": 12605, "**": 12606, "tle": 12607, "ĠEb": 12608, "keeping": 12609, "ĠBasketball": 12610, "ĠVon": 12611, "ĠCF": 12612, "MENT": 12613, "amm": 12614, "ĠFernando": 12615, "Ġcompares": 12616, "ĠDouble": 12617, "Ġconvictions": 12618, "Ġatop": 12619, "Ġcops": 12620, "Ġremembers": 12621, "Ġlacking": 12622, "dom": 12623, "itate": 12624, "ĠBeauty": 12625, "Ġdevelops": 12626, "ĠGor": 12627, "Ġfunctional": 12628, "ĠCOUNTY": 12629, "ĠUpon": 12630, "Ġsprint": 12631, "Ġinjection": 12632, "Ġminors": 12633, "ĠTamil": 12634, "ĠGat": 12635, "101": 12636, "ety": 12637, "Ġdrum": 12638, "Ġtasked": 12639, "Ġpact": 12640, "Ġ170": 12641, "MR": 12642, "ĠRamos": 12643, "Ġcandy": 12644, "Sc": 12645, "iced": 12646, "Ġsupermarket": 12647, "Ġworrying": 12648, "Ġsellers": 12649, "ĠTag": 12650, ".:": 12651, "Ġmixture": 12652, "oting": 12653, "Bl": 12654, "ĠLl": 12655, "ĠJal": 12656, "ican": 12657, "ĠBid": 12658, "country": 12659, "ĠStrategy": 12660, "Ġadverse": 12661, "Ġplunged": 12662, "ĠMit": 12663, "Ġstark": 12664, "aton": 12665, "Ġbooking": 12666, "Tr": 12667, "Ġcontainers": 12668, "Ġvintage": 12669, "ĠPit": 12670, "Ġsurfaced": 12671, "Ġindependently": 12672, "Ġdetection": 12673, "ĠBeyon": 12674, "Ġcasualties": 12675, "Ġstabbing": 12676, "oved": 12677, "Ġbarred": 12678, "Ġthereby": 12679, "Ġpartnered": 12680, "Ġposing": 12681, "ĠShannon": 12682, "ĠChapel": 12683, "Ġtechnically": 12684, "uous": 12685, "Â»": 12686, "ometer": 12687, "Ġwildfire": 12688, "share": 12689, "heart": 12690, "Ġammunition": 12691, "Ġthrive": 12692, "ĠStre": 12693, "GP": 12694, "cÃ©": 12695, "ĠMonaco": 12696, "goal": 12697, "ĠUm": 12698, "ĠHSBC": 12699, "ĠHilton": 12700, "ĠViv": 12701, "ĠKell": 12702, "Ġdecisive": 12703, "Ġmotive": 12704, "amo": 12705, "feld": 12706, "ĠWH": 12707, "iry": 12708, "ulu": 12709, "ĠSchneider": 12710, "Ġcampaigning": 12711, "Ġseparately": 12712, "igo": 12713, "ĠED": 12714, "ĠRamirez": 12715, "Ġmetro": 12716, "ĠPatel": 12717, "ĠChi": 12718, "ĠAudi": 12719, "Ġcharacteristics": 12720, "Ġrestart": 12721, "Ġkeyboard": 12722, "ĠSD": 12723, "his": 12724, "biz": 12725, "ĠSoft": 12726, "ĠGrammy": 12727, "Ġcontested": 12728, "Ġweekends": 12729, "Ġ112": 12730, "Ġcycling": 12731, "Ġhealthier": 12732, "ija": 12733, "Ġheader": 12734, "Ġemploy": 12735, "İ": 12736, "Ġshortages": 12737, "ĠAsk": 12738, "ĠIvanka": 12739, "Ġpartisan": 12740, "Ġflowing": 12741, "Ġcave": 12742, "ENS": 12743, "Ġups": 12744, "read": 12745, "ouch": 12746, "Ġ102": 12747, "Ġforming": 12748, "bot": 12749, "bie": 12750, "Ġenrolled": 12751, "Ġconcussion": 12752, "Ġaffidavit": 12753, "Ġmysterious": 12754, "uries": 12755, "ĠMang": 12756, "Ġauthentic": 12757, "Ġmetrics": 12758, "ĠTwins": 12759, "Ġprep": 12760, "IJ": 12761, "Ġdesired": 12762, "ĠDiv": 12763, "wall": 12764, "ĠTab": 12765, "Ġcompet": 12766, "Ġrelied": 12767, "Ġinequality": 12768, "Ġmanual": 12769, "ĠBucks": 12770, "agging": 12771, "Ġcorporation": 12772, "Ġbanner": 12773, "Ġgraphics": 12774, "Ġaccurately": 12775, "ĠMeeting": 12776, "Ġconsult": 12777, "ser": 12778, "Ġprotesting": 12779, "Ġhurting": 12780, "omed": 12781, "tes": 12782, "Ġrode": 12783, "Ġstartups": 12784, "Ġhanding": 12785, "ĠNest": 12786, "Ġconsistency": 12787, "anned": 12788, "dem": 12789, "ĠLyon": 12790, "ĠCompetition": 12791, "Ġtricky": 12792, "Ġcos": 12793, "ĠBengals": 12794, "arry": 12795, "Ġunderwent": 12796, "ĠKit": 12797, "à": 12798, "uploads": 12799, "Ġskate": 12800, "Ġ''": 12801, "Ġjun": 12802, "ĠContent": 12803, "focused": 12804, "lat": 12805, "ĠExp": 12806, "ought": 12807, "Ġnightmare": 12808, "ĠExpect": 12809, "Ġprecisely": 12810, "ĠMonica": 12811, "Ġlobbying": 12812, "ĠChester": 12813, "ĠInvest": 12814, "Former": 12815, "Ġimminent": 12816, "ĠNL": 12817, "Ġcomparing": 12818, "ĠChes": 12819, "ede": 12820, "ĠNobel": 12821, "mers": 12822, "ĠKin": 12823, "ĠBoko": 12824, "ount": 12825, "Ġthoroughly": 12826, "Ġscattered": 12827, "sharing": 12828, "markets": 12829, "ĠMis": 12830, "Ġambition": 12831, "Ġpreference": 12832, "Ġeffectiveness": 12833, "rio": 12834, "Ġheavyweight": 12835, "Ġovert": 12836, "anya": 12837, "ĠKanye": 12838, "ishi": 12839, "Ġrewards": 12840, "uled": 12841, "bach": 12842, "Ġemphasized": 12843, "Ġapologize": 12844, "ĠRecent": 12845, "!!": 12846, "Ġanimated": 12847, "ĠExxon": 12848, "Ġfruits": 12849, "Ġstripped": 12850, "fold": 12851, "ĠIndonesian": 12852, "ller": 12853, "Ġdementia": 12854, "Ġkidney": 12855, "Ġhalted": 12856, "years": 12857, "Ġconcerts": 12858, "Ġrefers": 12859, "ĠFri": 12860, "Your": 12861, "irl": 12862, "Ġleap": 12863, "jud": 12864, "ĠHugh": 12865, "ĠFO": 12866, "Ġsore": 12867, "Ġkil": 12868, "ĠMate": 12869, "cci": 12870, "Ġsetback": 12871, "Ġtightening": 12872, "keeper": 12873, "ĠAlbany": 12874, "Ġpolicymakers": 12875, "Ġdisorders": 12876, "ĠCBC": 12877, "ĠDiaz": 12878, "Ġmaps": 12879, "Ġroutinely": 12880, "Ġverify": 12881, "Ġbash": 12882, "ĠJinping": 12883, "Ġdisasters": 12884, "ĠMonroe": 12885, "ĠLouise": 12886, "JP": 12887, "ĠNevertheless": 12888, "Ġconcessions": 12889, "ĠPog": 12890, "going": 12891, "ĠFifth": 12892, "ĠJill": 12893, "ICT": 12894, "ĠFM": 12895, "ĠSugar": 12896, "ĠBarb": 12897, "Ġmidway": 12898, "Ġtin": 12899, "ĠPic": 12900, "ĠPL": 12901, "Ġleaks": 12902, "Ġgrief": 12903, "Ġtattoo": 12904, "`": 12905, "Ġment": 12906, "ĠNu": 12907, "Ġmarry": 12908, "Ġdiving": 12909, "Ġ1982": 12910, "Ġcoin": 12911, "ĠPoc": 12912, "Ġstarred": 12913, "ĠRiverside": 12914, "Ġsidelined": 12915, "Ġminers": 12916, "STON": 12917, "Ġbelongs": 12918, "ĠSantos": 12919, "ĠTechnical": 12920, "aco": 12921, "Ġadvise": 12922, "Ġstreams": 12923, "Ġcooler": 12924, "ĠHE": 12925, "Ġordering": 12926, "ĠTask": 12927, "ĠACT": 12928, "ĠAnton": 12929, "Ġcertification": 12930, "ĠLeafs": 12931, "ĠTS": 12932, "ĠSerbia": 12933, "azi": 12934, "inks": 12935, "ĠEST": 12936, "Ġrelay": 12937, "Â°": 12938, "Ġdisappearance": 12939, "ĠRomania": 12940, "Ġoven": 12941, "Ġowed": 12942, "ĠStrip": 12943, "ulated": 12944, "UC": 12945, "ITE": 12946, "bling": 12947, "Then": 12948, "ppy": 12949, "Ġunlimited": 12950, "Ġcalories": 12951, "Ġmerchandise": 12952, "Ġblonde": 12953, "ĠSpicer": 12954, "performing": 12955, "Ġimpl": 12956, "Ġplates": 12957, "Ġmosque": 12958, "Ġdemon": 12959, "Ġought": 12960, "Ġdumped": 12961, "Ġtracked": 12962, "even": 12963, "Ġstabil": 12964, "imet": 12965, "ĠLiga": 12966, "ugh": 12967, "ther": 12968, "agar": 12969, "Ġarchitect": 12970, "Ġallocated": 12971, "ĠJoey": 12972, "Ġmarathon": 12973, "master": 12974, "ĠBert": 12975, "Ġast": 12976, "ĠEbola": 12977, "ĠConservation": 12978, "nic": 12979, "Ġparallel": 12980, "Ġinmate": 12981, "Ġlocate": 12982, "Ġdistribute": 12983, "guard": 12984, "Ġtackling": 12985, "ential": 12986, "Ġvi": 12987, "Ġcups": 12988, "Ġrhythm": 12989, "Ġendured": 12990, "ĠHub": 12991, "ois": 12992, "ĠLiberals": 12993, "ĠRedskins": 12994, "ĠEP": 12995, "ĠKnox": 12996, "fr": 12997, "Ġmassacre": 12998, "oka": 12999, "Ġcompl": 13000, "raft": 13001, "ĠPublished": 13002, "Ġattraction": 13003, "ĠStephens": 13004, "ility": 13005, "ĠPul": 13006, "ĠCapt": 13007, "Ġexploded": 13008, "Ġexceeded": 13009, "lying": 13010, "Ġcal": 13011, "Mart": 13012, "Ġpaintings": 13013, "inate": 13014, "ĠBrendan": 13015, "Ġfortune": 13016, "onductor": 13017, "Ġphysicians": 13018, "ĠStudy": 13019, "ĠBul": 13020, "ĠModern": 13021, "HD": 13022, "ĠBour": 13023, "Ġtying": 13024, "Ġ1967": 13025, "Ġlighter": 13026, "Ġtoss": 13027, "inspired": 13028, "Ġgreeted": 13029, "Ġcycl": 13030, "Ġverified": 13031, "Ġmerit": 13032, "sign": 13033, "lder": 13034, "Ġdebts": 13035, "ĠSnyder": 13036, "Ġamendments": 13037, "Ġindicators": 13038, "ĠDortmund": 13039, "then": 13040, "ĠListen": 13041, "ĠFB": 13042, "ref": 13043, "ĠIoT": 13044, "ĠBrewers": 13045, "ĠLeadership": 13046, "ĠNicolas": 13047, "ĠBody": 13048, "Ġsam": 13049, "ĠAdvisor": 13050, "Ġcord": 13051, "Ġabuses": 13052, "ĠPortuguese": 13053, "Ġflown": 13054, "VR": 13055, "Ġconsumed": 13056, "Ġreass": 13057, "Ġalien": 13058, "Ġrivalry": 13059, "ĠREPORT": 13060, "ĠRush": 13061, "Ġdirecting": 13062, "Ġsearches": 13063, "ĠHP": 13064, "ĠRoll": 13065, "ĠFay": 13066, "ĠClare": 13067, "Ġhaul": 13068, "Ġriot": 13069, "Ġsettlements": 13070, "Ġnorm": 13071, "Ġaccelerated": 13072, "ĠLok": 13073, "Ġclever": 13074, "Ġhyd": 13075, "Ġstats": 13076, "ĠHull": 13077, "kers": 13078, "Ġbuys": 13079, "uter": 13080, "Ġfue": 13081, "https": 13082, "UD": 13083, "Ġisolation": 13084, "Ġsuspend": 13085, "ĠRules": 13086, "ĠCircle": 13087, "ĠHopefully": 13088, "played": 13089, "âĢ³": 13090, "ĠPRE": 13091, "sim": 13092, "edd": 13093, "ĠProperties": 13094, "Ġbeans": 13095, "Ġrevive": 13096, "ĠBir": 13097, "oug": 13098, "Ġmob": 13099, "Ġshowdown": 13100, "iman": 13101, "Ġpap": 13102, "Ġvol": 13103, "wu": 13104, "Ġdiver": 13105, "Ġpill": 13106, "ĠMarlins": 13107, "ĠLamar": 13108, "Ġpersistent": 13109, "Ġcondolences": 13110, "ĠThor": 13111, "Ab": 13112, "Ġimpress": 13113, "ĠRaptors": 13114, "Ġreferences": 13115, "Ġstiff": 13116, "ĠBash": 13117, "eding": 13118, "Ġmurders": 13119, "ĠGene": 13120, "ĠManila": 13121, "Ġbrokers": 13122, "Ms": 13123, "start": 13124, "ĠDhabi": 13125, "etz": 13126, "Ġsubmission": 13127, "ĠSchmidt": 13128, "ĠPersonal": 13129, "ĠBeverly": 13130, "ĠMovie": 13131, "ĠLamb": 13132, "Ġplacement": 13133, "Ġfolk": 13134, "Ġfrequency": 13135, "Ġplanted": 13136, "Ġtwins": 13137, "prov": 13138, "rec": 13139, "Ġpermanently": 13140, "Ġcoordination": 13141, "ĠCart": 13142, "Ġobstacles": 13143, "Ġliterature": 13144, "Ġtu": 13145, "Ġchill": 13146, "ĠReserved": 13147, "Ġlovers": 13148, "ĠOutside": 13149, "Ġslideshow": 13150, "ĠGru": 13151, "Ġty": 13152, "Ġsalad": 13153, "Ġlaboratory": 13154, "ĠHolt": 13155, "Ġ103": 13156, "urb": 13157, "ĠOrganisation": 13158, "ĠAndrews": 13159, "Ġrecipient": 13160, "arch": 13161, "Ġbleeding": 13162, "ĠPand": 13163, "Ġoverturned": 13164, "Ġlistened": 13165, "Ġclause": 13166, "Ġnationalist": 13167, "Ġresumed": 13168, "ĠCout": 13169, "ĠPride": 13170, "Ġlayers": 13171, "ĠBella": 13172, "Ġreversed": 13173, "Ġpriest": 13174, "ĠFX": 13175, "Ġalbeit": 13176, "Ġhalfway": 13177, "Ġcotton": 13178, "ĠCarey": 13179, "ĠTE": 13180, "OCK": 13181, "Ġbuck": 13182, "ributes": 13183, "ea": 13184, "Ġfancy": 13185, "ĠBuc": 13186, "Ġbans": 13187, "uters": 13188, "Ġliabilities": 13189, "ĠSou": 13190, "ĠBernie": 13191, "Ġintervene": 13192, "food": 13193, "ĠNDP": 13194, "Ġinsist": 13195, "Ġcontracted": 13196, "hawk": 13197, "),\"": 13198, "ĠDawn": 13199, "Ġmol": 13200, "Ġcommissioners": 13201, "Ġstranded": 13202, "Ġoverwhelmed": 13203, "Ġrecipes": 13204, "Ġva": 13205, "Ġrad": 13206, "Ġscare": 13207, "rez": 13208, "Ġeliminating": 13209, "Ġresc": 13210, "ĠBreak": 13211, "chn": 13212, "Ġdelight": 13213, "iot": 13214, "Ġfreely": 13215, "TI": 13216, "ĠBluetooth": 13217, "ĠMonth": 13218, "ĠFlor": 13219, "ĠFreddie": 13220, "Ġtrailed": 13221, "Ġinvestigative": 13222, "Ġimposing": 13223, "Ġattracting": 13224, "awk": 13225, "ĠSherman": 13226, "Ġsucceeded": 13227, "Ġvent": 13228, "Ġreconciliation": 13229, "ĠCel": 13230, "ĠThroughout": 13231, "ĠDowntown": 13232, "ĠBrother": 13233, "Ġtraditions": 13234, "Ġmir": 13235, "Ġstamp": 13236, "tery": 13237, "etti": 13238, "isch": 13239, "tic": 13240, "Ġbanning": 13241, "loss": 13242, "ĠSpeedway": 13243, "Ġstalled": 13244, "ĠEN": 13245, "ASH": 13246, "thing": 13247, "ĠAppeals": 13248, "rac": 13249, "Ġdistress": 13250, "ĠConservatives": 13251, "ĠPremium": 13252, "usa": 13253, "Ġslump": 13254, "imm": 13255, "ĠSupp": 13256, "ĠWong": 13257, "Ġdistant": 13258, "Ġ104": 13259, "Ġtide": 13260, "ĠNorfolk": 13261, "ĠYang": 13262, "Ġsmashed": 13263, "ĠBarrett": 13264, "inho": 13265, "Ġrobbed": 13266, "ĠFarmers": 13267, "filled": 13268, "BT": 13269, "Ġautumn": 13270, "Ġtemple": 13271, "ĠJacobs": 13272, "Ġprecipitation": 13273, "ĠHours": 13274, "ĠFlight": 13275, "Ġbeside": 13276, "ĠOre": 13277, "!)": 13278, "ĠTurnbull": 13279, "Ġpig": 13280, "Ġcooling": 13281, "Ġservers": 13282, "oriented": 13283, "Ġlocks": 13284, "ĠSears": 13285, "aving": 13286, "ĠQuick": 13287, "ĠGlob": 13288, "ĠMining": 13289, "Ġhorizon": 13290, "arians": 13291, "ĠOm": 13292, "writing": 13293, "Ġbelieving": 13294, "Ġbon": 13295, "Ġmounted": 13296, "Ġpunt": 13297, "ucci": 13298, "uzz": 13299, "cul": 13300, "Ġkiss": 13301, "ĠOnt": 13302, "ĠCyprus": 13303, "Ġrelying": 13304, "Ġpiano": 13305, "Ġcure": 13306, "Ġcontinuously": 13307, "ĠNobody": 13308, "ĠBund": 13309, "osis": 13310, "ĠAurora": 13311, "ĠBach": 13312, "ĠKendall": 13313, "Ġechoed": 13314, "iable": 13315, "Ġconscious": 13316, "Ġmonster": 13317, "omo": 13318, "proof": 13319, "ĠNate": 13320, "Ġfilmmaker": 13321, "ĠNaj": 13322, "Ġvendor": 13323, "ĠFoot": 13324, "ĠChang": 13325, "ĠFest": 13326, "Ġselfie": 13327, "Ġenters": 13328, "ĠConor": 13329, "ĠMosul": 13330, "ĠWHAT": 13331, "Ġwa": 13332, "ĠGamb": 13333, "osta": 13334, "Ġcautioned": 13335, "ĠTucker": 13336, "ĠAirways": 13337, "Ġvisitor": 13338, "ĠÂ·": 13339, "ĠRevolution": 13340, "aching": 13341, "Ġearliest": 13342, "ĠQuality": 13343, "Ġshorts": 13344, "ube": 13345, "ĠOperation": 13346, "ĠSabha": 13347, "Ġstrengths": 13348, "ikes": 13349, "Ġsexy": 13350, "Ġrot": 13351, "ibles": 13352, "Ġcolours": 13353, "THE": 13354, "ailed": 13355, "Ġwoke": 13356, "ĠEmbassy": 13357, "Ġinfamous": 13358, "rov": 13359, "State": 13360, "âĢ¦.": 13361, "Ġpond": 13362, "Ġcapt": 13363, "fore": 13364, "De": 13365, "Ġedited": 13366, "self": 13367, "Hey": 13368, "Ġportrait": 13369, "ĠManufact": 13370, "ĠStand": 13371, "Ġcontenders": 13372, "':": 13373, "acker": 13374, "Ġwithdrawn": 13375, "ĠBraves": 13376, "ĠHosp": 13377, "changing": 13378, "ĠBag": 13379, "Ġadjustment": 13380, "ĠCousins": 13381, "ĠAAP": 13382, "Ġfi": 13383, "Ġoutdoors": 13384, "Ġlacked": 13385, "BM": 13386, "ĠWHO": 13387, "ĠPST": 13388, "ĠLuck": 13389, "Ġassisting": 13390, "ĠGround": 13391, "ĠTeen": 13392, "ĠOle": 13393, "Ġembarrassing": 13394, "ĠWalt": 13395, "ĠVision": 13396, "ĠFal": 13397, "ĠZoo": 13398, "ĠWorth": 13399, "ĠFloyd": 13400, "ĠGujarat": 13401, "Ġtipped": 13402, "Ġfam": 13403, "ĠDad": 13404, "Ġworship": 13405, "Ġtyre": 13406, "Ġrebuilding": 13407, "Ġqualities": 13408, "ĠLives": 13409, "Ġbeats": 13410, "Ġ450": 13411, "Ġexisted": 13412, "ĠGeorg": 13413, "Ġpoured": 13414, "rows": 13415, "ĠOx": 13416, "ĠSid": 13417, "Ġmac": 13418, "Ġteaches": 13419, "ĠEli": 13420, "alla": 13421, "Ġdownside": 13422, "ĠBend": 13423, "non": 13424, "ĠArmenia": 13425, "Ġcultures": 13426, "ĠMae": 13427, "Ġduration": 13428, "ĠAthletics": 13429, "Ġjuvenile": 13430, "Ġlid": 13431, "Ġbankers": 13432, "Ġoverview": 13433, "wy": 13434, "Ġorbit": 13435, "Vs": 13436, "because": 13437, "Ps": 13438, "ĠFran": 13439, "Ġtouring": 13440, "Ġwary": 13441, "Ġ106": 13442, "Ġlaser": 13443, "ĠVij": 13444, "âĦ¢": 13445, "Ġsurrender": 13446, "press": 13447, "rees": 13448, "NO": 13449, "ĠShortly": 13450, "ĠKor": 13451, "edu": 13452, "Ġhatred": 13453, "Ġtee": 13454, "Ġfamously": 13455, "Ġkeeper": 13456, "ND": 13457, "Ġreduces": 13458, "HC": 13459, "Ġhay": 13460, "Ġunnamed": 13461, "ĠTes": 13462, "Ġattackers": 13463, "ĠFew": 13464, "ĠRichards": 13465, "Ġ1968": 13466, "Ġspeeches": 13467, "Ġcybersecurity": 13468, "ĠInfrastructure": 13469, "Ġ07": 13470, "ENCE": 13471, "uties": 13472, "Ġanxious": 13473, "ĠGang": 13474, "Ġannouncements": 13475, "lette": 13476, "oret": 13477, "ĠRockies": 13478, "ĠEmployees": 13479, "ĠThrones": 13480, "Ġhugely": 13481, "Ġclin": 13482, "ĠHob": 13483, "Ġfraction": 13484, "ĠOfficial": 13485, "ĠMariners": 13486, "ĠElse": 13487, "Ġsanctuary": 13488, "ĠPhotograph": 13489, "Ġreopen": 13490, "lf": 13491, "hm": 13492, "vest": 13493, "Ġspeeding": 13494, "Ġtooth": 13495, "ĠShi": 13496, "ĠTitle": 13497, "ĠMes": 13498, "ĠJobs": 13499, "fair": 13500, "ĠDanish": 13501, "ĠMalik": 13502, "Ġlaughed": 13503, "Ġnavy": 13504, "ĠActress": 13505, "ĠWilliamson": 13506, "overs": 13507, "Ġreckless": 13508, "Ġjo": 13509, "otic": 13510, "Ġassaulting": 13511, "Ġpri": 13512, "ĠPi": 13513, "Ġlesser": 13514, "Ġtit": 13515, "Ġdat": 13516, "Ġnail": 13517, "ĠMarathon": 13518, "ĠGren": 13519, "ĠDol": 13520, "Ġjointly": 13521, "Ġamended": 13522, "mine": 13523, "ĠBashar": 13524, "ĠHyundai": 13525, "Ġuncovered": 13526, "Ġeducated": 13527, "atti": 13528, "pres": 13529, "ĠBRE": 13530, "Ġya": 13531, "Bank": 13532, "odd": 13533, "lit": 13534, "ĠLinks": 13535, "Ġswitching": 13536, "itte": 13537, "ĠSind": 13538, "erved": 13539, "Ġ**": 13540, "Ġpositively": 13541, "Ġfrankly": 13542, "Ġrevenge": 13543, "ĠTrinity": 13544, "ĠCDC": 13545, "Ġthreatens": 13546, "Ġhammer": 13547, "NET": 13548, "ĠMut": 13549, "Ġsy": 13550, "Ġunidentified": 13551, "icken": 13552, "Ġdrills": 13553, "Ġtense": 13554, "Ġforeigners": 13555, "OST": 13556, "Ġethical": 13557, "ĠDurham": 13558, "ĠQual": 13559, "Ġterritories": 13560, "Ġid": 13561, "hor": 13562, "enders": 13563, "Mc": 13564, "OV": 13565, "percent": 13566, "Ġdom": 13567, "Ġupward": 13568, "Ġamb": 13569, "Ġvisas": 13570, "zan": 13571, "Ãĥ": 13572, "Ġundocumented": 13573, "Ġsuburbs": 13574, "Ġhydro": 13575, "ĠJob": 13576, "ĠAdelaide": 13577, "oya": 13578, "ĠSR": 13579, "ĠMick": 13580, "Ġconsolidation": 13581, "Ġemotionally": 13582, "ĠHop": 13583, "Her": 13584, "Ġloses": 13585, "ĠMoto": 13586, "eled": 13587, "Ġregulated": 13588, "ental": 13589, "Ġencountered": 13590, "Ġhop": 13591, "ĠTrafford": 13592, "Ġsticks": 13593, "Ġveto": 13594, "Ġexpose": 13595, "Ġstretched": 13596, "fin": 13597, "inance": 13598, "chair": 13599, "ĠGareth": 13600, "ĠPil": 13601, "ĠHammond": 13602, "Ġserial": 13603, "omy": 13604, "Ġcellphone": 13605, "ĠClara": 13606, "Ġreacted": 13607, "ĠNic": 13608, "ĠHomes": 13609, "ĠBroadcasting": 13610, "ĠFut": 13611, "ĠSupply": 13612, "assing": 13613, "ĠNewman": 13614, "Ġcharitable": 13615, "ĠClayton": 13616, "Ġsovereignty": 13617, "Ġconvincing": 13618, "ĠPrincipal": 13619, "ĠHigher": 13620, "ĠCut": 13621, "ĠCarrie": 13622, "ĠSpot": 13623, "Sometimes": 13624, "ĠJar": 13625, "ĠConsider": 13626, "ieu": 13627, "Ġrefinery": 13628, "Ġbloody": 13629, "wheel": 13630, "Ġcryptocurrencies": 13631, "Fund": 13632, "ĠSunderland": 13633, "ĠEvents": 13634, "âĢĭ": 13635, "Ġaccidentally": 13636, "deep": 13637, "Ġfranc": 13638, "bec": 13639, "ĠHartford": 13640, "Ġstellar": 13641, "wright": 13642, "kick": 13643, "UG": 13644, "ĠBeast": 13645, "Ġrefusal": 13646, "ĠRoberto": 13647, "ĠDixon": 13648, "ĠDiane": 13649, "name": 13650, "asts": 13651, "ĠCharter": 13652, "Ġfueled": 13653, "Ġcontents": 13654, "Ġaccessing": 13655, "Ġtroubles": 13656, "Ġtops": 13657, "Ġdebuted": 13658, "icating": 13659, "Ġinvestigator": 13660, "Ġsubscribing": 13661, "Ġcoordinated": 13662, "ĠFil": 13663, "six": 13664, "teen": 13665, "Ġwithdrew": 13666, "ĠGilbert": 13667, "Ġ1983": 13668, "arsity": 13669, "Ġimagination": 13670, "Ġhandgun": 13671, "ĠAlibaba": 13672, "Ġbug": 13673, "Ġ107": 13674, "ĠCOMP": 13675, "ĠSomething": 13676, "Ġreliability": 13677, "ĠFCC": 13678, "ĠFowler": 13679, "Ġsingled": 13680, "nom": 13681, "Ġknocking": 13682, "Ġmeddling": 13683, "Ġdetermining": 13684, "reports": 13685, "Ġshade": 13686, "ĠSN": 13687, "anto": 13688, "Ġcomplaining": 13689, "ĠNan": 13690, "WS": 13691, "Ġyoungsters": 13692, "Il": 13693, "ĠKaw": 13694, "ĠProp": 13695, "ĠCell": 13696, "ĠHurricanes": 13697, "Ġpublicity": 13698, "ĠXin": 13699, "rial": 13700, "ICO": 13701, "Ġsupervision": 13702, "ĠSpotify": 13703, "ĠNewport": 13704, "Ġprince": 13705, "anche": 13706, "Ġsubscriber": 13707, "ĠVic": 13708, "ACT": 13709, "ĠRaf": 13710, "ĠActing": 13711, "Ġcollusion": 13712, "pet": 13713, "isl": 13714, "Ġcommerce": 13715, "Health": 13716, "ĠAbraham": 13717, "pri": 13718, "Ġlightweight": 13719, "Ġinsurer": 13720, "Like": 13721, "Ġhelmet": 13722, "Ġevac": 13723, "look": 13724, "ĠNaval": 13725, "160": 13726, "ĠFleet": 13727, "vol": 13728, "Ġexpired": 13729, "ĠKlein": 13730, "ĠEmmy": 13731, "ABLE": 13732, "ĠMorocco": 13733, "ĠTrip": 13734, "uted": 13735, "Ġnos": 13736, "ĠVista": 13737, "mas": 13738, "ĠRocky": 13739, "ĠFlint": 13740, "enberg": 13741, "ĠBrow": 13742, "Ġsignatures": 13743, "Ġpolar": 13744, "ajo": 13745, "Ġendorsement": 13746, "Ġreservations": 13747, "LIN": 13748, "anny": 13749, "elli": 13750, "last": 13751, "Ġoversee": 13752, "cm": 13753, "ĠOilers": 13754, "Are": 13755, "Ġjudiciary": 13756, "onte": 13757, "ĠTrack": 13758, "Ġsupervisor": 13759, "erk": 13760, "isher": 13761, "Ġintact": 13762, "Ġslid": 13763, "icals": 13764, "paid": 13765, "ĠMAR": 13766, "lement": 13767, "ĠLiu": 13768, "ĠLarge": 13769, "ĠWings": 13770, "pect": 13771, "ĠRum": 13772, "Ġanalyzed": 13773, "Ġemploys": 13774, "arte": 13775, "ims": 13776, "ĠEventually": 13777, "Ġaffiliated": 13778, "Ġhospitality": 13779, "ĠSprint": 13780, "Ġresolutions": 13781, "Ġliquor": 13782, "ĠNAFTA": 13783, "ANY": 13784, "Ġradiation": 13785, "ĠProv": 13786, "Ġpause": 13787, "ĠTMZ": 13788, "Ġelbow": 13789, "Ġresilience": 13790, "ĠParents": 13791, "mus": 13792, "ĠSafe": 13793, "Ġinterpretation": 13794, "Ġraced": 13795, "IND": 13796, "KR": 13797, "Ġhinted": 13798, "ĠErin": 13799, "ĠBahrain": 13800, "Ġcredentials": 13801, "eless": 13802, "Ġprocurement": 13803, "ĠWebb": 13804, "ĠLowe": 13805, "ĠNak": 13806, "ĠLearning": 13807, "zh": 13808, "Ġdipped": 13809, "ĠSuite": 13810, "Ġmisdemeanor": 13811, "ALE": 13812, "Ġstrengthened": 13813, "ĠSophie": 13814, "Ġconfirms": 13815, "Ġrac": 13816, "gey": 13817, "Ġshootout": 13818, "Ġble": 13819, "Ġcircles": 13820, "ĠChef": 13821, "Ġcomprised": 13822, "ĠSantiago": 13823, "Ġfeud": 13824, "beat": 13825, "Ġstaffers": 13826, "Ġacute": 13827, "ski": 13828, "Ġpolled": 13829, "ĠKur": 13830, "ĠJen": 13831, "ĠUltimately": 13832, "anded": 13833, "ĠHoney": 13834, "Ġannounces": 13835, "Ġamateur": 13836, "around": 13837, "Ġfunctioning": 13838, "group": 13839, "ĠSqu": 13840, "Where": 13841, "Ġvoid": 13842, "ĠSandra": 13843, "isers": 13844, "Ġhelicopters": 13845, "ĠGym": 13846, "ĠWol": 13847, "mouth": 13848, "Ġsubjected": 13849, "ici": 13850, "ually": 13851, "ĠWash": 13852, "ĠLindsay": 13853, "ĠVers": 13854, "Ġjumps": 13855, "Ġneglect": 13856, "ĠKuwait": 13857, "fund": 13858, "ĭ": 13859, "ather": 13860, "lly": 13861, "ei": 13862, "Although": 13863, ".''": 13864, "Ġunhappy": 13865, "Ġpills": 13866, "Ġmagical": 13867, "Ġdro": 13868, "Ġinviting": 13869, "ĠJohnston": 13870, "oving": 13871, "450": 13872, "ĠMerc": 13873, "Ġadmitting": 13874, "Ġinsisting": 13875, "ĠCru": 13876, "ĠResource": 13877, "oir": 13878, "Ġcomplexity": 13879, "ĠRoth": 13880, "ĠCher": 13881, "July": 13882, "raf": 13883, "Ġaggregate": 13884, "Ġhelm": 13885, "uclear": 13886, "olan": 13887, "Ġoffenses": 13888, "ĠWolves": 13889, "ĠFu": 13890, "ĠPierce": 13891, "Ġemailed": 13892, "ĠStra": 13893, "Ġpedestrians": 13894, "ĠER": 13895, "ĠConway": 13896, "Ġblowing": 13897, "CLOSE": 13898, "hab": 13899, "ĠGreene": 13900, "Ġconfessed": 13901, "ĠTorres": 13902, "ĠHolocaust": 13903, "Ġrepay": 13904, "Ġdemonstrates": 13905, "ĠPool": 13906, "gent": 13907, "Ġdeleted": 13908, "Ġ$$": 13909, "ĠSO": 13910, "Ġdri": 13911, "ĠNeg": 13912, "ĠVP": 13913, "ĠPF": 13914, "ĠPrep": 13915, "Ġorganizing": 13916, "icker": 13917, "Ġmanufactured": 13918, "enson": 13919, "adas": 13920, "Ġwines": 13921, "Ġmachinery": 13922, "Ġspecialists": 13923, "ĠDetective": 13924, "ĠDL": 13925, "Op": 13926, "Ġquicker": 13927, "ĠPenguins": 13928, "Engine": 13929, "zone": 13930, "Ġsequence": 13931, "ĠLost": 13932, "Ġwarmer": 13933, "ĠEthiopia": 13934, "Ġaffirmed": 13935, "fest": 13936, "resses": 13937, "Ġsoap": 13938, "Ġbooth": 13939, "Ġnotorious": 13940, "amin": 13941, "Ġpursued": 13942, "ĠCer": 13943, "ĠSB": 13944, "Ġlivestock": 13945, "Ġtrace": 13946, "Ġrespects": 13947, "arden": 13948, "April": 13949, "Ġ128": 13950, "ĠSaid": 13951, "ennial": 13952, "Ġnamely": 13953, "ĠBot": 13954, "Ġ108": 13955, "ĠLem": 13956, "nell": 13957, "Ġconfirming": 13958, "Ġlogged": 13959, "Ġprofound": 13960, "elo": 13961, "ĠChambers": 13962, "RT": 13963, "Ġnewer": 13964, "Ġsideline": 13965, "ĠCardinal": 13966, "este": 13967, "Ġnarrowly": 13968, "Ġcompromised": 13969, "Ġpolicing": 13970, "Ġporn": 13971, "Ġarc": 13972, "Ġlearnt": 13973, "INE": 13974, "step": 13975, "ĠDomin": 13976, "Ġwaist": 13977, "Ġboycott": 13978, "mitted": 13979, "iffs": 13980, "ground": 13981, "ĠMaterials": 13982, "Ġceasefire": 13983, "Right": 13984, "ĠZen": 13985, "estyle": 13986, "Thank": 13987, "ĠOnePlus": 13988, "ĠMLS": 13989, "Ġconstituents": 13990, "oster": 13991, "ĠProsecutor": 13992, "Ġpriorit": 13993, "ĠDebbie": 13994, "ĠExpand": 13995, "uv": 13996, "Ġintegrate": 13997, "Ġimmun": 13998, "Ġdisciplinary": 13999, "ĠImm": 14000, "Ġja": 14001, "Ġgardens": 14002, "ĠHim": 14003, "obe": 14004, "Ġhitter": 14005, "Ġbullets": 14006, "Ġevolving": 14007, "ĠScientists": 14008, "Michael": 14009, "ĠDO": 14010, "Ġunbelievable": 14011, "Ġlooming": 14012, "Ġdownturn": 14013, "Ġmentality": 14014, "Ġreopened": 14015, "Ġash": 14016, "ĠChapman": 14017, "Ġloop": 14018, "ĠUT": 14019, "ĠTier": 14020, "Ġunaware": 14021, "Ġgratitude": 14022, "Ġperforms": 14023, "olk": 14024, "Ġ\"(": 14025, "Ġlacks": 14026, "Ġinstructed": 14027, "ĠRecreation": 14028, "sample": 14029, "Ġrequesting": 14030, "Canada": 14031, "Ġsupposedly": 14032, "ĠHardy": 14033, "Ġholder": 14034, "change": 14035, "ĠDominic": 14036, "ĠXavier": 14037, "Ġlig": 14038, "Ġcandid": 14039, "ĠRab": 14040, "Ġconferences": 14041, "ĠBurton": 14042, "Dr": 14043, "Ġmunicipalities": 14044, "Ġcrushed": 14045, "Ġseekers": 14046, "ĠCitizens": 14047, "Ġheightened": 14048, "ĠCasino": 14049, "Ġdesktop": 14050, "Ġwhoever": 14051, "ĠImpact": 14052, "Ġcocktail": 14053, "Ġphilanthrop": 14054, "ĠSAN": 14055, "ĠPreston": 14056, "Ġobesity": 14057, "Ġrestrict": 14058, "ĠKab": 14059, "ĠProvidence": 14060, "Ġscar": 14061, "ĠChart": 14062, "Ġbosses": 14063, "ĠRate": 14064, "Ġsav": 14065, "pay": 14066, "Ġtransplant": 14067, "ĠNoble": 14068, "child": 14069, "Ġconclusions": 14070, "FI": 14071, "Ġsack": 14072, "Ġexperimental": 14073, "holder": 14074, "oca": 14075, "herty": 14076, "ĠMT": 14077, "Ġcatcher": 14078, "LY": 14079, "Ġgrams": 14080, "reet": 14081, "Ġadaptation": 14082, "Ġhumble": 14083, "Ġbot": 14084, "Ġidentical": 14085, "ication": 14086, "ifer": 14087, "ĠCrow": 14088, "Ġregain": 14089, "ĠLightning": 14090, "Ġkg": 14091, "Ġcomposed": 14092, "Ġcorrespondent": 14093, "Ġreunion": 14094, "Ġobserve": 14095, "Ġcomprising": 14096, "Ġimpeachment": 14097, "Ġresh": 14098, "Ġlemon": 14099, "ĠSnap": 14100, "Ġproprietary": 14101, "een": 14102, "ourt": 14103, "Ġdetective": 14104, "Ġlabels": 14105, "Ġcorridor": 14106, "ĠClinic": 14107, "Ġarra": 14108, "ĠPearl": 14109, "Ġinformal": 14110, "ĠUnd": 14111, "ĠVenezuelan": 14112, "Ġpeninsula": 14113, "Ġdefeating": 14114, "Ġsyndrome": 14115, "iere": 14116, "Ġspite": 14117, "bag": 14118, "aran": 14119, "Ġspecialized": 14120, "ĠAA": 14121, "ĠLyn": 14122, "Ġinstrumental": 14123, "Smith": 14124, "Ġpivotal": 14125, "Ġnightclub": 14126, "ĠCob": 14127, "Ġcolorful": 14128, "Ġartwork": 14129, "Ġ1981": 14130, "Ġdawn": 14131, "erville": 14132, "uated": 14133, "ief": 14134, "Ġlinking": 14135, "ĠOw": 14136, "Ġappreci": 14137, "Ġreductions": 14138, "elling": 14139, "Ġsalmon": 14140, "bb": 14141, "ĠPhillip": 14142, "yle": 14143, "Ġassure": 14144, "Ġdiscretion": 14145, "Ġefficiently": 14146, "ĠMau": 14147, "abil": 14148, "Ġintentionally": 14149, "Ġactivated": 14150, "Ġimmense": 14151, "ĠStrategic": 14152, "Ġcheating": 14153, "ĠTrend": 14154, "ĠSamantha": 14155, "Ġcomple": 14156, "Ġhack": 14157, "ĠSerie": 14158, "ĠText": 14159, "Ġstylish": 14160, "ĠFaith": 14161, "ĠGST": 14162, "Ġexterior": 14163, "Ġblessing": 14164, "Ġblanket": 14165, "Ġcooked": 14166, "Ġretaliation": 14167, "Ġtro": 14168, "Ġshelves": 14169, "rose": 14170, "ĠGram": 14171, "Ġsho": 14172, "ĠArgentine": 14173, "Ġclerk": 14174, "specific": 14175, "Ġagreeing": 14176, "Ġstandout": 14177, "black": 14178, "Ġtrending": 14179, "Ġviolate": 14180, "Get": 14181, "Ã±o": 14182, "ĠOpt": 14183, "ĠFrankfurt": 14184, "ĠFranco": 14185, "eness": 14186, "Ġlining": 14187, "Ġzoo": 14188, "oil": 14189, "lia": 14190, "rab": 14191, "Ġorganize": 14192, "Ġwoods": 14193, "Ġscan": 14194, "Ġurgency": 14195, "Ġoccurring": 14196, "Ġreliance": 14197, "Ġconcepts": 14198, "Ġeligibility": 14199, "0000": 14200, "ĠBrief": 14201, "Ġabusive": 14202, "ĠBench": 14203, "Ġrub": 14204, "ĠDil": 14205, "Ġmount": 14206, "Ġmaturity": 14207, "ĠNut": 14208, "nee": 14209, "enc": 14210, "Ġgunfire": 14211, "ĠKill": 14212, "Ġgates": 14213, "Ġflower": 14214, "iol": 14215, "Ġshaped": 14216, "Ġundoubtedly": 14217, "Ġbackgrounds": 14218, "ĠComplex": 14219, "\":{\"": 14220, "Ġnaming": 14221, "Ġmonument": 14222, "Ġoh": 14223, "Ġembedded": 14224, "Ġbang": 14225, "ĠKro": 14226, "Ġaggression": 14227, "ĠMits": 14228, "During": 14229, "ĠEp": 14230, "iners": 14231, "ĠAnaheim": 14232, "Ġrom": 14233, "Ġoutgoing": 14234, "Ġfulfill": 14235, "Ġreminds": 14236, "Ġren": 14237, "à¤": 14238, "ĠSue": 14239, "Ġrefresh": 14240, "Ġlif": 14241, "Ġfil": 14242, "ĠLead": 14243, "Ġregulate": 14244, "ĠTeachers": 14245, "Ġclarify": 14246, "obs": 14247, "Ġblasted": 14248, "ĠAx": 14249, "Ġflavors": 14250, "Ġmega": 14251, "Ġhurdles": 14252, "Ġinspector": 14253, "ĠSalvador": 14254, "Ġprescribed": 14255, "Ġrenovation": 14256, "OUR": 14257, "Ġutil": 14258, "ĠBradford": 14259, "Ġwasted": 14260, "Ġlineman": 14261, "Ġpalm": 14262, "icate": 14263, "Ġoverseeing": 14264, "otted": 14265, "ĠRapids": 14266, "Ġjustified": 14267, "aby": 14268, "Ġextends": 14269, "Ġoath": 14270, "bow": 14271, "ĠRivera": 14272, "Jan": 14273, "ĠImran": 14274, "Ġforests": 14275, "ĠShel": 14276, "ĠBrun": 14277, "Ġaerial": 14278, "ĠNOW": 14279, "PAR": 14280, "Ġbeverages": 14281, "ettel": 14282, "Ġfragile": 14283, "Ġcodes": 14284, "Į": 14285, "abel": 14286, "Watch": 14287, "road": 14288, "Ġdismissal": 14289, "ĠRosa": 14290, "Ġcrunch": 14291, "²": 14292, "Ġinnovations": 14293, "Ġhabitat": 14294, "Ġforefront": 14295, "ĠKoch": 14296, "ĠChevrolet": 14297, "Ġwheelchair": 14298, "Ġconsiderably": 14299, "Ġexpenditures": 14300, "Ġtexts": 14301, "Ġprompt": 14302, "Ġskating": 14303, "Ġpetroleum": 14304, "ĠICC": 14305, "Ġvit": 14306, "fit": 14307, "Ġprolonged": 14308, "ĠLucy": 14309, "Ġcho": 14310, "Ġrocked": 14311, "ĠBrom": 14312, "Ġfreed": 14313, "Ġyours": 14314, "ĠEden": 14315, "Ġmonitored": 14316, "asted": 14317, "Ġoversees": 14318, "ieri": 14319, "Ġideology": 14320, "ĠFine": 14321, "tering": 14322, "Top": 14323, "Ġdamp": 14324, "uta": 14325, "Ġlethal": 14326, "Ġpurple": 14327, "udge": 14328, "ĠChemical": 14329, "ĠPetersburg": 14330, "Ġwarns": 14331, "Ġcollectively": 14332, "Ġâ": 14333, "Ġplaintiffs": 14334, "ĠBoris": 14335, "Ġsheep": 14336, "oves": 14337, "ĠAuthor": 14338, "Ġcampuses": 14339, "Ġdestroying": 14340, "Ġgloves": 14341, "Ġcease": 14342, "Ġdelegates": 14343, "Ġpreceded": 14344, "realDonaldTrump": 14345, "Ġforwards": 14346, "erton": 14347, "ĠBuzzFeed": 14348, "Ġoccupation": 14349, "ĠLegion": 14350, "Ġstir": 14351, "Ġshale": 14352, "Ġterrific": 14353, "Ġnewborn": 14354, "Ġstandoff": 14355, "OWN": 14356, "Ġmuscles": 14357, "ĠHerman": 14358, "ĠLiz": 14359, "ĠExperience": 14360, "ĠSuccess": 14361, "ĠHispanic": 14362, "ĠCCTV": 14363, "Ġcomplement": 14364, "ĠBing": 14365, "Ġprem": 14366, "ĠJohannes": 14367, "Ġdent": 14368, "itar": 14369, "ĠHein": 14370, "ĠNicola": 14371, "Ġconcludes": 14372, "ĠKhal": 14373, "Ġparish": 14374, "Ġshaking": 14375, "ĠSchw": 14376, "mod": 14377, "ĠLil": 14378, "Ã±a": 14379, "ĠBog": 14380, "ĠFight": 14381, "Ġgre": 14382, "Ġfel": 14383, "Ġheal": 14384, "err": 14385, "TM": 14386, "airo": 14387, "health": 14388, "Ġswings": 14389, "Ġtier": 14390, "anka": 14391, "ribune": 14392, "emouth": 14393, "ĠBloom": 14394, "Ġowing": 14395, "Tech": 14396, "Ġdough": 14397, "Ġbatch": 14398, "ĠLion": 14399, "ĠZamb": 14400, "Ġcrashing": 14401, "ĠXL": 14402, "ppers": 14403, "ĠDoctors": 14404, "ĠSor": 14405, "video": 14406, "Ġcigarettes": 14407, "ĠBoxing": 14408, "Ġconstitute": 14409, "Ġconcentrate": 14410, "ĠArmenian": 14411, "Ġsemester": 14412, "position": 14413, "emic": 14414, "ĠNYC": 14415, "ĠCampus": 14416, "Ġalternate": 14417, "Ġexped": 14418, "Ġpublishers": 14419, "2015": 14420, "Ġunanimous": 14421, "ĠPrevious": 14422, "Ġwellness": 14423, "ĠCreative": 14424, "edy": 14425, "AGE": 14426, "ĠCavs": 14427, "Ġ1978": 14428, "Ġfu": 14429, "ĠTata": 14430, "ĠChoice": 14431, "Ġwoes": 14432, "ĠCable": 14433, "Ġ~": 14434, "ĠGem": 14435, "Ġconsolidated": 14436, "ĠManitoba": 14437, "Cloud": 14438, "Ġrounded": 14439, "ĠVentura": 14440, "Ġshark": 14441, "Ġdresses": 14442, "Ġtraction": 14443, "eda": 14444, "Ġdiv": 14445, "Ġdental": 14446, "Wh": 14447, "ĠGig": 14448, "ĠBoyd": 14449, "ĠTransit": 14450, "Ġtelevised": 14451, "SON": 14452, "ĠVince": 14453, "Ġcloses": 14454, "apt": 14455, "ĠWheeler": 14456, "ĠTyson": 14457, "Ġforensic": 14458, "Ġpunished": 14459, "Ġseas": 14460, "Ġnavigation": 14461, "Ġprecedent": 14462, "Ġextremist": 14463, "Ġcomposite": 14464, "PO": 14465, "Ġsurvivor": 14466, "ĠVale": 14467, "gars": 14468, "HT": 14469, "ĠRiyadh": 14470, "Ġrevival": 14471, "ĠPayne": 14472, "Ġcollaborative": 14473, "ĠCustomers": 14474, "ĠPf": 14475, "Ġproves": 14476, "erve": 14477, "Ġelev": 14478, "ĠPaper": 14479, "Ġchore": 14480, "Ġthriller": 14481, "Ġstraw": 14482, "cock": 14483, "Gu": 14484, "Ġaligned": 14485, "ĠChronicle": 14486, "Ġshouting": 14487, "Ġ1976": 14488, "Ġlightning": 14489, "Ġworlds": 14490, "ĠOpening": 14491, "enton": 14492, "ĠAna": 14493, "ĠGol": 14494, "ĠTechn": 14495, "lis": 14496, "Ġorientation": 14497, "ĠArri": 14498, "ĠPG": 14499, "ross": 14500, "Ġsank": 14501, "LOS": 14502, "ĠAllison": 14503, "Ġsmiles": 14504, "USD": 14505, "Ġkits": 14506, "Bar": 14507, "ĠBri": 14508, "Ġounces": 14509, "ĠNielsen": 14510, "eno": 14511, "Ġ109": 14512, "Ġnorms": 14513, "Ġskip": 14514, "180": 14515, "Ġmonitors": 14516, "2012": 14517, "Ġincorporate": 14518, "Ġmechanisms": 14519, "ĠHack": 14520, "ĠBomb": 14521, "ĠGavin": 14522, "ĠNatalie": 14523, "Ġdiscusses": 14524, "Ġassembled": 14525, "Ġcognitive": 14526, "owner": 14527, "Ġgenuinely": 14528, "Ġdisappear": 14529, "ĠAK": 14530, "Ġstal": 14531, "Ġsoup": 14532, "ĠFinn": 14533, "Ġcares": 14534, "Ġfinest": 14535, "Ġtuned": 14536, "ende": 14537, "ĠStefan": 14538, "Ġaccompanying": 14539, "Ã®": 14540, "Maybe": 14541, "Ġoffender": 14542, "TT": 14543, "Ġ212": 14544, "Ġvolleyball": 14545, "needed": 14546, "Ġquo": 14547, "Ġdim": 14548, "ĠHistorical": 14549, "ĠLance": 14550, "gmail": 14551, "ĠGate": 14552, "Ġdemonstrators": 14553, "Ġdy": 14554, "cia": 14555, "ĠSteele": 14556, "ĠJoan": 14557, "ĠKerala": 14558, "KA": 14559, "ĠElectoral": 14560, "Ġpaths": 14561, "Ã¸": 14562, "Ne": 14563, "Ġaccepts": 14564, "Ġlowering": 14565, "Ġportions": 14566, "ĠValencia": 14567, "Ġfestivals": 14568, "Ġgeneric": 14569, "usk": 14570, "ĠVernon": 14571, "ĠOrioles": 14572, "Ġrenewal": 14573, "Ġbelonged": 14574, "Ġbreathe": 14575, "Ġ220": 14576, "Ġrecruited": 14577, "Ġlogic": 14578, "Ġrecreation": 14579, "Ġverbal": 14580, "ĠHaz": 14581, "double": 14582, "Ġfavourites": 14583, "Ġfundamentals": 14584, "ĠSoc": 14585, "360": 14586, "SO": 14587, "Ġalerted": 14588, "Ġbriefed": 14589, "ĠBruno": 14590, "Ġseating": 14591, "Ġfreight": 14592, "ĠAmer": 14593, "Ġwished": 14594, "table": 14595, "growth": 14596, "ĠWent": 14597, "Ġhilarious": 14598, "Ġthroat": 14599, "bet": 14600, "gon": 14601, "Ġample": 14602, "hee": 14603, "ĠHood": 14604, "ĠIceland": 14605, "ĠAnkara": 14606, "iang": 14607, "Ġpracticing": 14608, "azer": 14609, "Ġleaf": 14610, "Ġhottest": 14611, "Ġmarginal": 14612, "Ġrevelations": 14613, "ĠPrices": 14614, "ĠLar": 14615, "times": 14616, "Ġhandles": 14617, "ĠNaz": 14618, "Ġinstitute": 14619, "Ġtranslate": 14620, "ĠJP": 14621, "Ġsoared": 14622, "Ġconsume": 14623, "ĠTap": 14624, "ĠCelebrity": 14625, "ĠMayweather": 14626, "ĠOracle": 14627, "Ġmor": 14628, "ANA": 14629, "Ġpaperwork": 14630, "aste": 14631, "Ġdil": 14632, "Ġdecorated": 14633, "Ġpromotional": 14634, "ĠMerrill": 14635, "Ġappliances": 14636, "ĠCOP": 14637, "Ġlips": 14638, "ĠBrennan": 14639, "ĠMile": 14640, "ĠNetworks": 14641, "ĠComment": 14642, "ĠIb": 14643, "ĠAgg": 14644, "IDE": 14645, "Ġinitiate": 14646, "Ġknockout": 14647, "Ġbargain": 14648, "Ġaccordingly": 14649, "bee": 14650, "ĠGerald": 14651, "Ġproblematic": 14652, "Ġtrap": 14653, "Ġfinalists": 14654, "addy": 14655, "would": 14656, "Ġstrictly": 14657, "ĠRamsey": 14658, "Ġdownward": 14659, "Ġextract": 14660, "Ġfamed": 14661, "ĠOUT": 14662, "Ġinduct": 14663, "ĠAuckland": 14664, "Ġpoetry": 14665, "mos": 14666, "ĠGuinea": 14667, "management": 14668, "ohan": 14669, "ĠGuide": 14670, "aily": 14671, "umping": 14672, "Ġenacted": 14673, "ĠEye": 14674, "vision": 14675, "umi": 14676, "aped": 14677, "Ġbicycle": 14678, "ĠHouth": 14679, "ĠNAS": 14680, "Ġtapped": 14681, "wer": 14682, "otti": 14683, "EA": 14684, "Ġsurprises": 14685, "ĠUpdate": 14686, "ĠPun": 14687, "ĠMiz": 14688, "ĠOro": 14689, "Ġcostumes": 14690, "title": 14691, "Ġsurviving": 14692, "According": 14693, "themed": 14694, "ĠPeoples": 14695, "Se": 14696, "Ġassociations": 14697, "hett": 14698, "Time": 14699, "Ġessay": 14700, "Ġmu": 14701, "ĠScore": 14702, "ĠSpani": 14703, "ĠSEE": 14704, "Ġmales": 14705, "Ġrage": 14706, "EU": 14707, "ĠYellow": 14708, "rupt": 14709, "Ġapparel": 14710, "Ġsweat": 14711, "Ġnearest": 14712, "zman": 14713, "Ġanticipation": 14714, "Ġinjuring": 14715, "Ġousted": 14716, "chan": 14717, "ĠAlert": 14718, "Ġber": 14719, "atal": 14720, "Com": 14721, "Ġ04": 14722, "Ġafterward": 14723, "edge": 14724, "ĠBooker": 14725, "lex": 14726, "ĠWhole": 14727, "Ġtoughest": 14728, "ĠMaharashtra": 14729, "lier": 14730, "ĠTennis": 14731, "Ġhandy": 14732, "ĠMetal": 14733, "ĠiTunes": 14734, "ĠDiscovery": 14735, "Ġcompassion": 14736, "ĠLIVE": 14737, "Ġeconomically": 14738, "Ġendangered": 14739, "GO": 14740, "Ġmound": 14741, "word": 14742, "ĠTouch": 14743, "ogo": 14744, "Ġincomes": 14745, "when": 14746, "ĠAside": 14747, "Ġscandals": 14748, "Ġfunctionality": 14749, "ĠAer": 14750, "Ġcouncils": 14751, "Ġdenial": 14752, "140": 14753, "Ġimplied": 14754, "Ġoutfits": 14755, "Ġsuited": 14756, "Ġ1973": 14757, "ĠPizza": 14758, "Ġdebates": 14759, "record": 14760, "Ġhype": 14761, "ĠRus": 14762, "ĠRobbie": 14763, "Ġtouted": 14764, "ĠSharp": 14765, "Ġbeings": 14766, "Ġslavery": 14767, "encies": 14768, "ĠRooney": 14769, "Ġnan": 14770, "Ġraids": 14771, "Ġinstructor": 14772, "Market": 14773, "Ġshook": 14774, "Ġdeliberate": 14775, "ĠNorthwestern": 14776, "ĠEss": 14777, "Ġwhatsoever": 14778, "ĠConfederate": 14779, "YS": 14780, "ĠCameroon": 14781, "ĠFlip": 14782, "Yeah": 14783, "Ġwashing": 14784, "mand": 14785, "ĠLex": 14786, "Ġissuance": 14787, "Ġniche": 14788, "Ġfold": 14789, "ĠWendy": 14790, "Ġhy": 14791, "Ġbucket": 14792, "ĠVW": 14793, "ĠCairo": 14794, "ĠSK": 14795, "ĠKang": 14796, "Ġintake": 14797, "Ġhills": 14798, "anz": 14799, "Â©": 14800, "ugu": 14801, "ĠFortunately": 14802, "ĠMarqu": 14803, "Ġimprisonment": 14804, "oking": 14805, "Ġdistributors": 14806, "zie": 14807, "Ġstip": 14808, "ĠWire": 14809, "Ġcouncillors": 14810, "Ġsue": 14811, "ĠRegardless": 14812, "ĠEnc": 14813, "Ġbaking": 14814, "ĠVenture": 14815, "Ġintriguing": 14816, "Ġupheld": 14817, "ĠActive": 14818, "Ġgenes": 14819, "ĠDawson": 14820, "ĠPreviously": 14821, "ĠRac": 14822, "Ġmetric": 14823, "Files": 14824, "ĠiPhones": 14825, "ĠWelcome": 14826, "Ġburns": 14827, "ĠScreen": 14828, "ashes": 14829, "ĠApr": 14830, "Ġtheories": 14831, "san": 14832, "ĠRenault": 14833, "ĠSinger": 14834, "Ġfounders": 14835, "Russian": 14836, "ĠBelfast": 14837, "Ġimagined": 14838, "ĠPlanet": 14839, "ĠCatalan": 14840, "ĠRochester": 14841, "Ġevolve": 14842, "ĠOT": 14843, "Ġpassword": 14844, "Ġhomelessness": 14845, "Ġbacklog": 14846, "Ġpresenter": 14847, "Ġfal": 14848, "ISH": 14849, "ĠEM": 14850, "icked": 14851, "Ġunlock": 14852, "city": 14853, "Ġnegotiation": 14854, "Ġdancers": 14855, "dan": 14856, "ĠCOL": 14857, "VC": 14858, "boat": 14859, "Ġoverly": 14860, "deal": 14861, "lander": 14862, "Ġdiss": 14863, "ICS": 14864, "Ġfifty": 14865, "Ġowe": 14866, "Ġprisons": 14867, "ifications": 14868, "wo": 14869, "ĠAu": 14870, "Ġapiece": 14871, "ĠCourtney": 14872, "Ġ1975": 14873, "Ġsurpass": 14874, "Ġidentities": 14875, "Ġintegral": 14876, "Ġdocumentation": 14877, "Ġelegant": 14878, "ĠIg": 14879, "Ġdear": 14880, "Ġ113": 14881, "ĠGupta": 14882, "Ġcontentious": 14883, "rish": 14884, "Ġclues": 14885, "Ġadditions": 14886, "Ġep": 14887, "rus": 14888, "Ġcentered": 14889, "ĠPhillies": 14890, "father": 14891, "Ġborough": 14892, "Ġbuttons": 14893, "Ġdeported": 14894, "ĠREC": 14895, "ĠAlready": 14896, "eh": 14897, "hur": 14898, "Ġupbeat": 14899, "omen": 14900, "Ġdetailing": 14901, "Ġwr": 14902, "Ġvaried": 14903, "ĠEconomics": 14904, "Ġensures": 14905, "ĠCivic": 14906, "Ġunpaid": 14907, "sold": 14908, "ĠHil": 14909, "ĠMult": 14910, "ĠRising": 14911, "ĠMini": 14912, "Ġneuro": 14913, "Ġpenal": 14914, "Ġneighbour": 14915, "ĠChavez": 14916, "Ġjew": 14917, "ĠVIP": 14918, "Connor": 14919, "ĠTalking": 14920, "Ġcorrection": 14921, "Ġstandpoint": 14922, "roads": 14923, "ĠWool": 14924, "Ġverification": 14925, "Ġmic": 14926, "olf": 14927, "Ġexemption": 14928, "Ġfilter": 14929, "Ġballoon": 14930, "leases": 14931, "ician": 14932, "ĠSpr": 14933, "Ġtoe": 14934, "Ġunconstitutional": 14935, "Ġmanslaughter": 14936, "Ġtossed": 14937, "ĠMeg": 14938, "ATIONS": 14939, "ACK": 14940, "ĠRouge": 14941, "ĠHansen": 14942, "ĠHook": 14943, "Out": 14944, "ĠHorse": 14945, "ĠBath": 14946, "ĠAlways": 14947, "Ġincorporated": 14948, "Ġconjunction": 14949, "ĠFit": 14950, "Ġexamining": 14951, "Ġwallet": 14952, "Ġensured": 14953, "Ġacclaimed": 14954, "ippers": 14955, "Ġbeneficiaries": 14956, "Ġunexpectedly": 14957, "Ġexploit": 14958, "ĠWillie": 14959, "Ġcomb": 14960, "ĠWalton": 14961, "rica": 14962, "icky": 14963, "Ġate": 14964, "ĠPadres": 14965, "Ġrib": 14966, "Ġsnacks": 14967, "ĠFernandez": 14968, "ĠMachine": 14969, "ction": 14970, "Ġillnesses": 14971, "ĠHoffman": 14972, "ĠSpaceX": 14973, "Ġju": 14974, "Ġswift": 14975, "Ġembark": 14976, "ĠRailway": 14977, "Ġmeasuring": 14978, "agers": 14979, "arsh": 14980, "Ġessence": 14981, "angle": 14982, "Ġolive": 14983, "ĠCommander": 14984, "iggs": 14985, "Ġrewarded": 14986, "Ġdispatched": 14987, "Ġplayground": 14988, "Â½": 14989, "ĠProgramme": 14990, "Ġstudios": 14991, "Ġskeptical": 14992, "ĠOlymp": 14993, "ĠKeys": 14994, "ĠSunshine": 14995, "amba": 14996, "ĠDonna": 14997, "Ġlightly": 14998, "Ġobtaining": 14999, "Ġpoisoning": 15000, "Ġaz": 15001, "Ġ1972": 15002, "Ġunconscious": 15003, "ECT": 15004, "Ġlied": 15005, "ĠKaz": 15006, "Ġ06": 15007, "ĠMoving": 15008, "Ġnum": 15009, "oral": 15010, "Ġassessments": 15011, "Ġscholarships": 15012, "Ġevacuate": 15013, "ĠSunni": 15014, "Ġquake": 15015, "Ġfort": 15016, "ques": 15017, "ĠAlonso": 15018, "Ġthread": 15019, "Ġsqueeze": 15020, "arat": 15021, "oly": 15022, "ĠAlphabet": 15023, "uting": 15024, "icio": 15025, "ĠRetirement": 15026, "ither": 15027, "Ġasleep": 15028, "Ġpairs": 15029, "Ġmanufacture": 15030, "ĠHazard": 15031, "Ġsidewalk": 15032, "Ġwears": 15033, "ĠCraft": 15034, "emen": 15035, "ieth": 15036, "Ġbypass": 15037, "ĠLancaster": 15038, "Ġflour": 15039, "charge": 15040, "ĠCLICK": 15041, "Ġpotatoes": 15042, "ĠKarachi": 15043, "Ġvalley": 15044, "Ġsights": 15045, "Ġfallout": 15046, "ords": 15047, "BN": 15048, "Ġsunshine": 15049, "Ġundertaken": 15050, "Ġcontestants": 15051, "Ġaccomplishments": 15052, "Ġconditioning": 15053, "Ġcel": 15054, "ĠHalifax": 15055, "Ġaccent": 15056, "***": 15057, "Ġpitchers": 15058, "Ġadopting": 15059, "Ġjustices": 15060, "Ġrip": 15061, "ince": 15062, "Ġelimination": 15063, "Ġaerospace": 15064, "ĠBeer": 15065, "ĠBasin": 15066, "Ġunwanted": 15067, "goers": 15068, "isco": 15069, "ĠTwin": 15070, "ĠDesert": 15071, "rix": 15072, "Ġdarkness": 15073, "ĠDunn": 15074, "City": 15075, "pop": 15076, "Ġ1969": 15077, "ataka": 15078, "Ġtal": 15079, "Ġautism": 15080, "ĠMcLaren": 15081, "ĠUEFA": 15082, "Ġclassrooms": 15083, "ĠLeave": 15084, "Americans": 15085, "las": 15086, "Ġqui": 15087, "Ġundefeated": 15088, "otto": 15089, "ĠNRA": 15090, "ĠPorsche": 15091, "Ġnuts": 15092, "oys": 15093, "ĠMethodist": 15094, "Ġatt": 15095, "Ġtweeting": 15096, "children": 15097, "eller": 15098, "Ġinquiries": 15099, "Ġmillennials": 15100, "ĠWembley": 15101, "INS": 15102, "Ġautopsy": 15103, "ĠElon": 15104, "ĠHicks": 15105, "ugg": 15106, "Ġwreck": 15107, "ĠComcast": 15108, "Ġstones": 15109, "public": 15110, "ĠKem": 15111, "bedroom": 15112, "ļ": 15113, "itated": 15114, "Ġsemic": 15115, "uman": 15116, "Cal": 15117, "ANN": 15118, "ĠGaz": 15119, "Ġundisclosed": 15120, "ĠPlanned": 15121, "ĠYale": 15122, "ĠIST": 15123, "lies": 15124, "ĠStanding": 15125, "Ġrelieved": 15126, "EO": 15127, "Ġgraduating": 15128, "park": 15129, "ĠâĢķ": 15130, "Ġpensions": 15131, "rave": 15132, "ĠWonder": 15133, "AZ": 15134, "Ġcosting": 15135, "Ġeditors": 15136, "Ġtotaled": 15137, "Ġspacecraft": 15138, "meter": 15139, "Ġ02": 15140, "ĠNikki": 15141, "sworth": 15142, "ĠCrit": 15143, "asha": 15144, "Ġknees": 15145, "Ġhats": 15146, "uity": 15147, "ĠPanther": 15148, "Ġtan": 15149, "ĠBuzz": 15150, "ĠGlad": 15151, "ĠPleasant": 15152, "SM": 15153, "Ġtricks": 15154, "Ġplac": 15155, "ĠDanielle": 15156, "Ġours": 15157, "Ġwashed": 15158, "haven": 15159, "Ġdrain": 15160, "ĠUttar": 15161, "Ġapple": 15162, "Ġjunk": 15163, "Ġturkey": 15164, "ĠDug": 15165, "Ġdiplomacy": 15166, "Ġempire": 15167, "Ġpinch": 15168, "Ġferry": 15169, "ĠDustin": 15170, "Ġ03": 15171, "Ġelder": 15172, "Everything": 15173, "ĠProgressive": 15174, "ution": 15175, "VI": 15176, "dam": 15177, "Ġlever": 15178, "ĠAustralians": 15179, "Ġconsequence": 15180, "itan": 15181, "Ġcondemn": 15182, "Ġneg": 15183, "ĠOverview": 15184, "Ġsuccesses": 15185, "Ġprobable": 15186, "ĠMirror": 15187, "mor": 15188, "verse": 15189, "Ġevaluating": 15190, "ĠBes": 15191, "Ġimm": 15192, "Ġharness": 15193, "Ġresilient": 15194, "ĠBuild": 15195, "Ġstraightforward": 15196, "ADE": 15197, "Ġgrandparents": 15198, "Ġmarched": 15199, "ĠKiev": 15200, "Ġchiefs": 15201, "oha": 15202, "Ġvest": 15203, "kn": 15204, "enda": 15205, "ĠSev": 15206, "Ġbatters": 15207, "ĠJos": 15208, "ĠQue": 15209, "ĠCourse": 15210, "ĠCorner": 15211, "ĠMess": 15212, "Ġmourn": 15213, "keepers": 15214, "ĠRegina": 15215, "Everybody": 15216, "Ġtrajectory": 15217, "Ġdefenseman": 15218, "ĠArticles": 15219, "Ġspur": 15220, "ĠPhD": 15221, "Ġpipes": 15222, "Ġduck": 15223, "Ġcombining": 15224, "ĠHit": 15225, "ĠGeorgetown": 15226, "ĠBee": 15227, "Cor": 15228, "Ġcomposition": 15229, "Ġconnects": 15230, "ĠMARK": 15231, "taker": 15232, "Ġcertainty": 15233, "Ġhefty": 15234, "ĠHezbollah": 15235, "ĠShip": 15236, "Ġmalicious": 15237, "AI": 15238, "Ġbits": 15239, "Ġstyl": 15240, "Ġimpaired": 15241, "ĠCBI": 15242, "Despite": 15243, "othe": 15244, "ĠRyder": 15245, "ĠAlf": 15246, "ifa": 15247, "Ind": 15248, "Ġblaming": 15249, "ĠToledo": 15250, "EW": 15251, "ĠEssex": 15252, "iated": 15253, "ĠAberdeen": 15254, "ANCE": 15255, "Ġpossess": 15256, "Ġsuperhero": 15257, "Ġoverhead": 15258, "quet": 15259, "ĠRicky": 15260, "Ġdock": 15261, "ĠTelecom": 15262, "Ġshelf": 15263, "³": 15264, "Ġmaritime": 15265, "Ġportrayed": 15266, "ĠYesterday": 15267, "Ġcollided": 15268, "Ġcookies": 15269, "ĠCul": 15270, "Ġindexes": 15271, "Ġnaval": 15272, "oval": 15273, "105": 15274, "ĠWeber": 15275, "chief": 15276, "arma": 15277, "ĠRey": 15278, "Ġauditor": 15279, "ĠMarion": 15280, "ĠMartha": 15281, "ĠSally": 15282, "Ġsedan": 15283, "ĠAlison": 15284, "nce": 15285, "Es": 15286, "ĠParade": 15287, "Ġpharmacy": 15288, "ĠKre": 15289, "loe": 15290, "cks": 15291, "Ġmitigate": 15292, "Ġdesigning": 15293, "Ġ2024": 15294, "Ġportable": 15295, "Ġimproves": 15296, "ĠAMD": 15297, "Ġexcluded": 15298, "CON": 15299, "ĠOscars": 15300, "Ġfixtures": 15301, "comb": 15302, "ĠBerg": 15303, "Ġbother": 15304, "Ġboring": 15305, "Ġobservation": 15306, "ĠCad": 15307, "Ġrecordings": 15308, "ĠCultural": 15309, "Ġweaken": 15310, "Ġaccuse": 15311, "ĠAbd": 15312, "abor": 15313, "115": 15314, "uffle": 15315, "Ġhighways": 15316, "atham": 15317, "empt": 15318, "ĠDeer": 15319, "ĠEDT": 15320, "ĠWait": 15321, "athan": 15322, "Ġaccumulated": 15323, "Ġguilt": 15324, "Ġexempt": 15325, "Ġdiluted": 15326, "ĠJamal": 15327, "Ġshit": 15328, "cross": 15329, "Ġeve": 15330, "Ġshirts": 15331, "Ġsatisfy": 15332, "ĠPaulo": 15333, "AH": 15334, "sic": 15335, "ĠChloe": 15336, "ĠCities": 15337, "ĠSwansea": 15338, "Ġprecision": 15339, "ĠTracy": 15340, "ping": 15341, "Ġcontinually": 15342, "Ġdemographic": 15343, "Ġcliff": 15344, "Ġjaw": 15345, "isted": 15346, "ĠDevelop": 15347, "ĠAJ": 15348, "Ġaisle": 15349, "ĠLionel": 15350, "Ġpredominantly": 15351, "Ġmel": 15352, "Ġlifelong": 15353, "hs": 15354, "Ġshouted": 15355, "lad": 15356, "Ġdest": 15357, "Ġpacks": 15358, "ĠKath": 15359, "ĠCruise": 15360, "fired": 15361, "oder": 15362, "hua": 15363, "Ġgoodbye": 15364, "Ġinterfere": 15365, "eca": 15366, "ĠrÃ©": 15367, "atum": 15368, "itas": 15369, "ĠLodge": 15370, "ĠWald": 15371, "Ġmidday": 15372, "umble": 15373, "asting": 15374, "©": 15375, "ĠLeg": 15376, "ĠNepal": 15377, "Ġchased": 15378, "idge": 15379, "Ġconv": 15380, "Ġfraudulent": 15381, "Ġopera": 15382, "Ġshr": 15383, "ĠUniverse": 15384, "ĠJerome": 15385, "Ġ1977": 15386, "ĠDancing": 15387, "ĠRS": 15388, "±": 15389, "eks": 15390, "Ġchic": 15391, "Ġpunish": 15392, "Ġpropose": 15393, "arin": 15394, "ĠChop": 15395, "ĠAhead": 15396, "ĠGallagher": 15397, "ĠBangkok": 15398, "ĠShelby": 15399, "ĠNS": 15400, "Ġcheek": 15401, "onia": 15402, "Ġrelegation": 15403, "ĠHind": 15404, "ĠCory": 15405, "Ġfingerprint": 15406, "Ġstrive": 15407, "Ġmm": 15408, "igs": 15409, "Ġholy": 15410, "Ġfavored": 15411, "ĠSomeone": 15412, "ĠLatino": 15413, "ĠPatt": 15414, "Ġchallenger": 15415, "ĠCotton": 15416, "Sw": 15417, "itten": 15418, "ĠXI": 15419, "ĠStat": 15420, "ĠDIS": 15421, "Ġautomakers": 15422, "Ġevaluated": 15423, "ĠArc": 15424, "Ġpersuade": 15425, "Af": 15426, "Ġreunited": 15427, "Ġabs": 15428, "Ġbride": 15429, "Ġpurely": 15430, "uce": 15431, "uded": 15432, "Ġsettling": 15433, "Ġlodged": 15434, "Ġfixing": 15435, "Ġsuccession": 15436, "ĠAlfred": 15437, "ĠAlvarez": 15438, "mac": 15439, "ĠFont": 15440, "Ġcontra": 15441, "affle": 15442, "Ġcopied": 15443, "Ġmasses": 15444, "ĠElections": 15445, "ĠThan": 15446, "Ġsoaring": 15447, "jay": 15448, "Ġsuing": 15449, "Ġconcentrated": 15450, "Ġconvey": 15451, "Ġ240": 15452, "gs": 15453, "ĠNeal": 15454, "Ġnasty": 15455, "ĠLB": 15456, "odi": 15457, "ĠSergei": 15458, "Ġthumb": 15459, "Ġservants": 15460, "Ġrevelation": 15461, "Ġdischarge": 15462, "ĠBright": 15463, "ĠBent": 15464, "ĠChrysler": 15465, "mill": 15466, "ĠImagine": 15467, "Ġreceptions": 15468, "Ġpersonalities": 15469, "Ġsilly": 15470, "ĠLoc": 15471, "ĠZero": 15472, "HI": 15473, "rice": 15474, "Ġgar": 15475, "far": 15476, "enh": 15477, "ĠBiden": 15478, "ĠEntreprene": 15479, "Ġassumption": 15480, "Ġnicely": 15481, "ĠEither": 15482, "|": 15483, "ĠNW": 15484, "ĠKens": 15485, "ĠNolan": 15486, "Ġowning": 15487, "atures": 15488, "ĠPastor": 15489, "ĠRegistration": 15490, "Ġexperiments": 15491, "Ġassurance": 15492, "Ġhashtag": 15493, "oint": 15494, "ĠBin": 15495, "Ġqualification": 15496, "center": 15497, "Ġausterity": 15498, "ĠPers": 15499, "Ġscoop": 15500, "Ġpros": 15501, "ĠFields": 15502, "Ġfur": 15503, "ĠJas": 15504, "Ġplanting": 15505, "security": 15506, "ĠTrain": 15507, "ĠKathy": 15508, "demand": 15509, "ĠLev": 15510, "Ġtut": 15511, "tier": 15512, "QU": 15513, "Ġexploitation": 15514, "Ġignoring": 15515, "ĠSex": 15516, "Ġadapted": 15517, "Ġdisastrous": 15518, "Ġempower": 15519, "Ġcreators": 15520, "ĠLay": 15521, "ĠDragon": 15522, "ĠWyn": 15523, "Ġ1974": 15524, "acious": 15525, "performance": 15526, "ĠTiffany": 15527, "isting": 15528, "Ġindividually": 15529, "ĠLeading": 15530, "ĠSask": 15531, "Ġcatastrophic": 15532, "Ġpunched": 15533, "ĠVienna": 15534, "Ġsurgical": 15535, "Gr": 15536, "odo": 15537, "Ġgem": 15538, "ĠMinority": 15539, "Ġmice": 15540, "ĠHistoric": 15541, "ĠKot": 15542, "caster": 15543, "Ġsuff": 15544, "journal": 15545, "Ġpresumably": 15546, "ĠBit": 15547, "inary": 15548, "Ġbre": 15549, "Ġenhancing": 15550, "Ġgru": 15551, "ĠRunning": 15552, "hardt": 15553, "Ġtroubling": 15554, "Ġpumps": 15555, "ĠProspect": 15556, "etic": 15557, "Ġmartial": 15558, "Ġcouncillor": 15559, "atra": 15560, "ths": 15561, "ĠSark": 15562, "ĠChamp": 15563, "scoring": 15564, "ĠWel": 15565, "rup": 15566, "Ġterrifying": 15567, "ĠCatch": 15568, "Ġinspections": 15569, "Ġpornography": 15570, "bra": 15571, "ĠKeeping": 15572, "Ġbanker": 15573, "angers": 15574, "ĠCrimea": 15575, "ĠDisclosure": 15576, "iba": 15577, "Ġturf": 15578, "Ġschedules": 15579, "ĠJorge": 15580, "ĠAcross": 15581, "Ġsolving": 15582, "Ġsensation": 15583, "ĠWW": 15584, "cial": 15585, "atz": 15586, "Ġlion": 15587, "Ġcertificates": 15588, "itive": 15589, "ĠWes": 15590, "ĠPrison": 15591, "ĠPlayStation": 15592, "duty": 15593, "Ġvariable": 15594, "Ġstrangers": 15595, "istrates": 15596, "vs": 15597, "Ġreigning": 15598, "Ġsliding": 15599, "ĠShin": 15600, "Ġtelecommunications": 15601, "Ġinstalling": 15602, "Ġrecogn": 15603, "Ġsubway": 15604, "too": 15605, "ĠMcKin": 15606, "ĠStoke": 15607, "Ġsensitivity": 15608, "bas": 15609, "Ġsan": 15610, "Ġ(-": 15611, "ĠSuarez": 15612, "Ġaverages": 15613, "ammu": 15614, "ĠFen": 15615, "Ġrefined": 15616, "outh": 15617, "Ġcob": 15618, "ĠLaz": 15619, "essa": 15620, "Ġpositioning": 15621, "Three": 15622, "Ġoils": 15623, "Ġassaults": 15624, "Ġcompanion": 15625, "ĠFlash": 15626, "ĠMam": 15627, "ĠTill": 15628, "Ġblues": 15629, "ĠJae": 15630, "ĠPier": 15631, "Ġbedrooms": 15632, "ĠHawkins": 15633, "ĠCornell": 15634, "Ġanswering": 15635, "Ġsec": 15636, "Ġrecognizes": 15637, "Red": 15638, "ĠJamaica": 15639, "Ġinsurgents": 15640, "Ġbrace": 15641, "Ġra": 15642, "ĠTai": 15643, "ocation": 15644, "ignment": 15645, "Ġreasonably": 15646, "inating": 15647, "Ġbonuses": 15648, "Ġsandwich": 15649, "Ġinadequate": 15650, "Ġdelicate": 15651, "Ġadorable": 15652, "Ġpalace": 15653, "Ġsmallest": 15654, "Ġpractically": 15655, "ĠCrosby": 15656, "Ġlevy": 15657, "Ġlend": 15658, "boards": 15659, "shaped": 15660, "Ġvulnerability": 15661, "ĠKelley": 15662, "Ġsponsorship": 15663, "ract": 15664, "Ġslew": 15665, "Ġfederation": 15666, "ĠLal": 15667, "acies": 15668, "ĠFamilies": 15669, "Ġproposing": 15670, "Ġhyp": 15671, "elected": 15672, "inkle": 15673, "ĠSays": 15674, "ĠApollo": 15675, "ĠWis": 15676, "imer": 15677, "Ġcombines": 15678, "Ġtim": 15679, "ĠQuestion": 15680, "Ġborrowers": 15681, "Ġswiftly": 15682, "ĠMagn": 15683, "Ġheadphones": 15684, "Russia": 15685, "Ġtongue": 15686, "Ġbye": 15687, "nn": 15688, "Ġseller": 15689, "ĠWord": 15690, "Tom": 15691, "ĠDevin": 15692, "ĠSurrey": 15693, "Ġquad": 15694, "Ġcourthouse": 15695, "gi": 15696, "ĠGrill": 15697, ">": 15698, "Ġrational": 15699, "ĠFlames": 15700, "ĠCham": 15701, "Ġvacuum": 15702, "ĠRays": 15703, "Ġescalating": 15704, "Ġouter": 15705, "Ġstretches": 15706, "ĠSpeed": 15707, "Ġnegatively": 15708, "Ġabsorb": 15709, "ĠAustrian": 15710, "Ġslice": 15711, "ĠDiet": 15712, "Ġbun": 15713, "Ġtactical": 15714, "ĠCBD": 15715, "Ġedges": 15716, "Ġnest": 15717, "Ġstrained": 15718, "ulates": 15719, "ĠTina": 15720, "Net": 15721, "ķ": 15722, "ĠGos": 15723, "God": 15724, "White": 15725, "Ġproudly": 15726, "usion": 15727, "ĠArlington": 15728, "ĠNear": 15729, "ĠMaxwell": 15730, "Ġbomber": 15731, "Ġcared": 15732, "Ġapprovals": 15733, "Ġexams": 15734, "ĠEconomy": 15735, "Ġposters": 15736, "ĠHampton": 15737, "ĠPere": 15738, "ĠContract": 15739, "Ġhoused": 15740, "Ġinstruction": 15741, "ĠJess": 15742, "Ġacre": 15743, "Ġcongestion": 15744, "ĠGener": 15745, "Ġdioxide": 15746, "Ġvar": 15747, "ĠAlexandria": 15748, "ĠSpider": 15749, "Ġcoins": 15750, "Ġ225": 15751, "Ġterritorial": 15752, "ĠSPD": 15753, "Ġfloat": 15754, "null": 15755, "Ġcalculate": 15756, "ĠDin": 15757, "eto": 15758, "Ġcows": 15759, "Ġpunct": 15760, "Ġexpire": 15761, "Ġkidnapped": 15762, "Ġcou": 15763, "Ġattitudes": 15764, "ĠLeh": 15765, "ĠHero": 15766, "ĠKabul": 15767, "Ġcubic": 15768, "Ġdigits": 15769, "ĠRES": 15770, "Ġpipelines": 15771, "icide": 15772, "ĠSingle": 15773, "Ġhurts": 15774, "ĠMaz": 15775, "ĠPak": 15776, "Ġslate": 15777, "Ġmultimedia": 15778, "ADA": 15779, "Mexico": 15780, "ĠRelease": 15781, "chard": 15782, "Ġgarlic": 15783, "ĠFletcher": 15784, "Ġaforementioned": 15785, "Ġ05": 15786, "ĠParkway": 15787, "Ġfirefighter": 15788, "Ġcounseling": 15789, "utions": 15790, "Cap": 15791, "Ġconsultants": 15792, "ĠMeh": 15793, "ouring": 15794, "ĠDI": 15795, "mic": 15796, "phones": 15797, "Ġencounters": 15798, "ĠHapp": 15799, "Ġcartoon": 15800, "flight": 15801, "Ġundertake": 15802, "ĠHans": 15803, "Ġplunge": 15804, "ĠParenthood": 15805, "Ġkickoff": 15806, "ĠCelsius": 15807, "ĠRas": 15808, "ĠDund": 15809, "ounce": 15810, "Ġpurse": 15811, "Ġmortality": 15812, "Ġbrains": 15813, "Ġconglomerate": 15814, "ĠObserver": 15815, "ĠSector": 15816, "ĠApparently": 15817, "Ġblank": 15818, "iston": 15819, "Ġweighs": 15820, "gro": 15821, "ĠPaw": 15822, "ĠCOM": 15823, "ĠPurdue": 15824, "Ġnetted": 15825, "ĠLinux": 15826, "Mike": 15827, "Ġfaithful": 15828, "Ġmagazines": 15829, "Ġheadquartered": 15830, "ĠIps": 15831, "Ġindications": 15832, "Look": 15833, "ĠElite": 15834, "Ġsupreme": 15835, "Ġchunk": 15836, "ĠSz": 15837, "ĠVine": 15838, "rise": 15839, "ĠYas": 15840, "general": 15841, "ĠOpera": 15842, "Ġpriests": 15843, "Assad": 15844, "Ġaunt": 15845, "Ġwhopping": 15846, "enzie": 15847, "Ġvegan": 15848, "Ġinflux": 15849, "ĠConsult": 15850, "Ġwaiver": 15851, "Having": 15852, "inning": 15853, "Ġproximity": 15854, "Ġclassical": 15855, "ĠIslanders": 15856, "Ġadvertisers": 15857, "ĠCe": 15858, "ĠSochi": 15859, "Ġmemoir": 15860, "ĠPlaying": 15861, "yers": 15862, "Ġstud": 15863, "Ġobservations": 15864, "Ġadmire": 15865, "Ġhiking": 15866, "Ġbatter": 15867, "Ġconfusing": 15868, "Ġprecaution": 15869, "kil": 15870, "clusive": 15871, "opoulos": 15872, "ĠWestbrook": 15873, "ĠTanzania": 15874, "ĠCedar": 15875, "usted": 15876, "Ġdestructive": 15877, "ĠIndies": 15878, "osi": 15879, "ĠAmid": 15880, "Ġintercepted": 15881, "Ġpartnering": 15882, "Ġsubstances": 15883, "ĠSuns": 15884, "Ġpromotes": 15885, "bird": 15886, "Gen": 15887, "aper": 15888, "ĠEy": 15889, "Ġterrain": 15890, "Ġ1930": 15891, "zon": 15892, "Ġbreed": 15893, "broken": 15894, "uchin": 15895, "ĠPrim": 15896, "ĠRoland": 15897, "Ġfitted": 15898, "Ġprotects": 15899, "Ġ114": 15900, "RP": 15901, "Ġdisrupted": 15902, "ĠBaylor": 15903, "oren": 15904, "ĠKeen": 15905, "Ġmansion": 15906, "Ġgrassroots": 15907, "ĠVictory": 15908, "Ġbarn": 15909, "Ġdepreciation": 15910, "oped": 15911, "immer": 15912, "Ġgarnered": 15913, "ĠLip": 15914, "ĠTob": 15915, "Ġcreatures": 15916, "ooter": 15917, "Ġconsortium": 15918, "obi": 15919, "ĠMonster": 15920, "arks": 15921, "turn": 15922, "Ġsketch": 15923, "Ġpredicting": 15924, "Ġminimize": 15925, "ĠEthan": 15926, "anson": 15927, "ĠAdjusted": 15928, "ĠHornets": 15929, "ĠNZ": 15930, "ĠKathleen": 15931, "ĠKier": 15932, "ĠMercury": 15933, "Ġghost": 15934, "Ġhaw": 15935, "ĠDemand": 15936, "ĠCollection": 15937, "ĠFortune": 15938, "Ġcruel": 15939, "Ġfurious": 15940, "ĠKun": 15941, "ĠSalem": 15942, "Ġunsuccessful": 15943, "ĠLomb": 15944, "ĠFury": 15945, "ahi": 15946, "Ġenthusiastic": 15947, "Ġsurgeries": 15948, "ACE": 15949, "Ġroller": 15950, "ĠStamford": 15951, "Being": 15952, "Dec": 15953, "check": 15954, "Ġaffection": 15955, "Ġgifted": 15956, "Ġenerg": 15957, "Ġvarying": 15958, "ĠCharl": 15959, "Ġsolved": 15960, "ĠNV": 15961, "Ġlaptops": 15962, "Ġkindness": 15963, "mart": 15964, "ĠPenny": 15965, "Ġ116": 15966, "ĠFeder": 15967, "ĠCisco": 15968, "Ġeducators": 15969, "Ġminim": 15970, "Ġgangs": 15971, "Ġfestivities": 15972, "ĠOriginal": 15973, "yre": 15974, "rying": 15975, "Ġtighter": 15976, "ĠMalta": 15977, "Ġshield": 15978, "interest": 15979, "Ġbuoy": 15980, "Ġsupplement": 15981, "ĠSof": 15982, "Ġok": 15983, "Ġprosecuted": 15984, "Ġinterventions": 15985, "Ġseize": 15986, "Ġcaravan": 15987, "ĠCarlson": 15988, "ĠEnterprises": 15989, "ĠChristina": 15990, "ĠWellington": 15991, "Ġaltered": 15992, "TP": 15993, "Ġexpresses": 15994, "Ġcomfortably": 15995, "Ġstaffing": 15996, "afa": 15997, "itu": 15998, "saving": 15999, "Ġinflammation": 16000, "hatt": 16001, "ĠMiranda": 16002, "icious": 16003, "Ġgrabbing": 16004, "ĠANY": 16005, "Ġobjections": 16006, "Ġdot": 16007, "cle": 16008, "Ġrelates": 16009, "Ġtribe": 16010, "Ġboarding": 16011, "ĠEpisode": 16012, "ĠEnjoy": 16013, "arding": 16014, "Ġathletics": 16015, "Ġflies": 16016, "Ġmortgages": 16017, "ruct": 16018, "Ġink": 16019, "ĠKC": 16020, "ĠSecondary": 16021, "Ġfer": 16022, "ĠQaeda": 16023, "OA": 16024, "Frank": 16025, "track": 16026, "ĠChandler": 16027, "Ġenv": 16028, "ĠLeaders": 16029, "ĠKemp": 16030, "Ġunsafe": 16031, "sponsored": 16032, "San": 16033, "ĠUsers": 16034, "PE": 16035, "ĠAccount": 16036, "otta": 16037, "ĠMix": 16038, "ĠCindy": 16039, "En": 16040, "Ġ175": 16041, "Ġoverlooked": 16042, "Ġpublications": 16043, "Ġrewarding": 16044, "Ġexplicit": 16045, "Ġnotch": 16046, "Ġspecifics": 16047, "Ġdesignation": 16048, "ĠAppeal": 16049, "Ġcontingent": 16050, "Ġcage": 16051, "ĠKol": 16052, "ĠJohns": 16053, "ĠReach": 16054, "ĠTin": 16055, "ĠAfricans": 16056, "Ġprec": 16057, "ĠRural": 16058, "ĠDw": 16059, "Ġuphold": 16060, "Ġsuffers": 16061, "Ġweed": 16062, "inst": 16063, "Ġcancellation": 16064, "ĠShaun": 16065, "Ġleve": 16066, "Ġdivisive": 16067, "Ġhel": 16068, "Ġfatigue": 16069, "ĠSchwartz": 16070, "ĠKirst": 16071, "Ġarise": 16072, "Ġgrandson": 16073, "ĠLawson": 16074, "Ġcollaborate": 16075, "Ġparticipant": 16076, "ĠBryce": 16077, "Ġinfield": 16078, "mid": 16079, "Ġut": 16080, "Ġnotices": 16081, "Ġsneak": 16082, "ĠPAR": 16083, "Chris": 16084, "Ġutilize": 16085, "ĠByron": 16086, "ĠZhang": 16087, "PF": 16088, "Ġoverwhelmingly": 16089, "Ġvegetable": 16090, "Ġabsurd": 16091, "ĠChem": 16092, "etime": 16093, "Ġenvoy": 16094, "Ġlover": 16095, "length": 16096, "Ġrevolutionary": 16097, "ĠYam": 16098, "Ġshutting": 16099, "mt": 16100, "super": 16101, "ĠToby": 16102, "ĠCoca": 16103, "Ġproposition": 16104, "Ġembracing": 16105, "Ġversatile": 16106, "ĠWalking": 16107, "Ġillicit": 16108, "Ġnude": 16109, "Ġunpredictable": 16110, "take": 16111, "Ġgotta": 16112, "ĠXiaomi": 16113, "Ġinstit": 16114, "ĠPep": 16115, "ĠPearson": 16116, "Ġrejection": 16117, "stead": 16118, "Ġmut": 16119, "Ġoutspoken": 16120, "ĠBaghdad": 16121, "ĠFly": 16122, "Ġwholly": 16123, "ĠRM": 16124, "ĠFa": 16125, "Ġcleaner": 16126, "frey": 16127, "ĠHab": 16128, "ĠLiber": 16129, "Ġwhereabouts": 16130, "Ġchefs": 16131, "Ġalumni": 16132, "Ġstopp": 16133, "dd": 16134, "forward": 16135, "rast": 16136, "ĠNash": 16137, "ĠCort": 16138, "Ġpotent": 16139, "Ġmold": 16140, "Ġdistinctive": 16141, "chip": 16142, "ĠBrunswick": 16143, "Ġpopulist": 16144, "Ġplagued": 16145, "eka": 16146, "ĠIOC": 16147, "ugs": 16148, "ĠDob": 16149, "Ġmagn": 16150, "asser": 16151, "hew": 16152, "Ġcapturing": 16153, "oos": 16154, "Ġcrystal": 16155, "Ġalarming": 16156, "Ġ135": 16157, "iating": 16158, "Ġnap": 16159, "umar": 16160, "ĠExpl": 16161, "Ġupgrading": 16162, "Ġdecl": 16163, "Ġoverturn": 16164, "ARK": 16165, "linked": 16166, "ĠContinued": 16167, "Ġslumped": 16168, "ĠGaga": 16169, "iful": 16170, "ĠPosted": 16171, "ĠRecommended": 16172, "Ġsnake": 16173, "Ġexplosives": 16174, "Ġhind": 16175, "Ġcontempt": 16176, "Ġmock": 16177, "NBA": 16178, "Ġstall": 16179, "Ġorganisers": 16180, "Ġingredient": 16181, "Ġblockbuster": 16182, "ĠStream": 16183, "ĠLeah": 16184, "Pic": 16185, "Ġventures": 16186, "oman": 16187, "Ġweakening": 16188, "Ġmaximize": 16189, "Ġdigging": 16190, "uez": 16191, "Ġdistinction": 16192, "ĠMali": 16193, "Ġcontaminated": 16194, "Ġhij": 16195, "Ġcrafts": 16196, "Fl": 16197, "Ġcloset": 16198, "ĠRapp": 16199, "Ġtowers": 16200, "Ġamenities": 16201, "Ġopioids": 16202, "Ġcontend": 16203, "load": 16204, "ĠJol": 16205, "ĠBooks": 16206, "Ġsim": 16207, "Ġthrilling": 16208, "Ġmeter": 16209, "ĠMultiple": 16210, "Ġarbitration": 16211, "Ġcracked": 16212, "Pl": 16213, "Ġphotographers": 16214, "Te": 16215, "ĠSidd": 16216, "Ġexplored": 16217, "170": 16218, "Ġpleasant": 16219, "ĠCapitals": 16220, "ĠRi": 16221, "ĠRandall": 16222, "overed": 16223, "Ġchar": 16224, "ĠEverybody": 16225, "ĠPolitics": 16226, "Ġmoisture": 16227, "Ġthriving": 16228, "ĠScotia": 16229, "arded": 16230, "imb": 16231, "ĠFantasy": 16232, "Ġcemetery": 16233, "ĠPath": 16234, "eur": 16235, "ĠSec": 16236, "ĠPlatform": 16237, "Ġdeparted": 16238, "ĠVIDEO": 16239, "ĠPant": 16240, "ĠSyn": 16241, "Ġ230": 16242, "bleacher": 16243, "live": 16244, "Ġprob": 16245, "Ġgymn": 16246, "Ġjudged": 16247, "orns": 16248, "Ġstemming": 16249, "umbling": 16250, "ĠHew": 16251, "ĠCheryl": 16252, "Ġconsciousness": 16253, "cos": 16254, "ĠTate": 16255, "CNN": 16256, "Ġrecognizing": 16257, "meg": 16258, "Ġpant": 16259, "ulk": 16260, "MM": 16261, "ĠPrescott": 16262, "ĠMarcel": 16263, "anas": 16264, "Ġhappier": 16265, "mag": 16266, "ĠLov": 16267, "Ġspreads": 16268, "ĠSample": 16269, "Ġpopped": 16270, "HR": 16271, "ĠMitt": 16272, "Ġ00": 16273, "Ġlabeled": 16274, "Ġaspirations": 16275, "?)": 16276, "Ġloads": 16277, "ĠBritt": 16278, "hurst": 16279, "ĠTeams": 16280, "Ġextremists": 16281, "ĠClement": 16282, "lings": 16283, "shirts": 16284, "cheon": 16285, "ĠDEL": 16286, "ĠLocation": 16287, "Ġpresentations": 16288, "ĠFalcon": 16289, "Ġtoddler": 16290, "kl": 16291, "Ġprone": 16292, "Ġcommemor": 16293, "ĠStanton": 16294, "201": 16295, "Ġranges": 16296, "Ġfielder": 16297, "Ġattends": 16298, "rade": 16299, "Ġproactive": 16300, "Ġhostage": 16301, "ĠGriffith": 16302, "ockey": 16303, "ĠAdding": 16304, "ĠAFL": 16305, "gas": 16306, "istics": 16307, "Ġsurgeon": 16308, "Ġtsunami": 16309, "2014": 16310, "Ġconstraints": 16311, "cu": 16312, "Ġsurrendered": 16313, "azed": 16314, "ĠAirbnb": 16315, "650": 16316, "zed": 16317, "Ġinjustice": 16318, "dog": 16319, "full": 16320, "ĠHear": 16321, "Ġsprawling": 16322, "Ġhomeland": 16323, "ĠSG": 16324, "anced": 16325, "Ġpools": 16326, "ĠCE": 16327, "Ġbeers": 16328, "AE": 16329, "ĠJac": 16330, "Ġrecurring": 16331, "Writing": 16332, "Ġgenius": 16333, "ĠFrost": 16334, "Ġgrounded": 16335, "Ġallege": 16336, "lessness": 16337, "Ġjumper": 16338, "Ġvicious": 16339, "Ġsecretly": 16340, "Ġhacked": 16341, "ĠAmsterdam": 16342, "ibu": 16343, "Ġ1971": 16344, "ĠRosenstein": 16345, "nick": 16346, "arge": 16347, "Ġladder": 16348, "elled": 16349, "Ġsatellites": 16350, "Ġassassination": 16351, "ĠDepot": 16352, "built": 16353, "Ġunrelated": 16354, "maid": 16355, "ĠDod": 16356, "ĠVanderbilt": 16357, "Ġboundary": 16358, "ĠStafford": 16359, "ĠBry": 16360, "Ġtribunal": 16361, "Ġoutings": 16362, "Ġquantity": 16363, "imming": 16364, "ĠBlacks": 16365, "Br": 16366, "eri": 16367, "uffed": 16368, "Ġexplicitly": 16369, "ĠBieber": 16370, "AKING": 16371, "Ġphotographed": 16372, "ĠPolit": 16373, "Ġpremature": 16374, "hered": 16375, "ĠVi": 16376, "Ġmarsh": 16377, "casters": 16378, "ĠKra": 16379, "Ġdried": 16380, "Ġcafe": 16381, "eting": 16382, "Ġshaping": 16383, "aram": 16384, "orf": 16385, "Ġrichest": 16386, "Ġhurricanes": 16387, "Ġcommands": 16388, "Gl": 16389, "anth": 16390, "Ġstunt": 16391, "Ġyearly": 16392, "Ġdefeats": 16393, "Ġconsultancy": 16394, "call": 16395, "Ġlag": 16396, "adh": 16397, "ĠPalestine": 16398, "Ġcustomized": 16399, "ĠScar": 16400, "ĠWesley": 16401, "ready": 16402, "Ġpersist": 16403, "Ġpacking": 16404, "ono": 16405, "Ġdischarged": 16406, "Ġpouring": 16407, "sburg": 16408, "Ġreconsider": 16409, "ĠMethod": 16410, "enez": 16411, "cill": 16412, "Ġsecular": 16413, "pers": 16414, "Ġple": 16415, "ELS": 16416, "ĠMine": 16417, "Ġpushes": 16418, "Us": 16419, "Ġframes": 16420, "ĠNets": 16421, "ĠSiem": 16422, "ĠHitler": 16423, "kill": 16424, "Ġrented": 16425, "Ġcharm": 16426, "Ġpulls": 16427, "ĠTide": 16428, "Ġinsufficient": 16429, "itted": 16430, "Care": 16431, "iera": 16432, "Ġcouch": 16433, "aders": 16434, "ext": 16435, "ĠCitizen": 16436, "Ġlogical": 16437, "ĠMeadows": 16438, "ĠDenis": 16439, "ĠDrivers": 16440, "Ġrepublic": 16441, "Ġadvising": 16442, "Ġparamedics": 16443, "insky": 16444, "illard": 16445, "encia": 16446, "Ġkh": 16447, "Ġrh": 16448, "Ġfinalized": 16449, "Ġreins": 16450, "ĠFarrell": 16451, "Ġsteer": 16452, "Ġproxy": 16453, "unes": 16454, "ĠSoul": 16455, "ĠCopper": 16456, "ĠKenyan": 16457, "amped": 16458, "conference": 16459, "sted": 16460, "ĠLon": 16461, "Ġreplay": 16462, "ĠBle": 16463, "Ġvibe": 16464, "Ġportfolios": 16465, "sea": 16466, "Ġbeautifully": 16467, "Ġairs": 16468, "ĠRap": 16469, "ĠKatrina": 16470, "Ġberth": 16471, "gold": 16472, "ĠIsaiah": 16473, "iques": 16474, "elson": 16475, "Ġrelentless": 16476, "ĠHighland": 16477, "ĠPhilippe": 16478, "ĠFol": 16479, "Ġenduring": 16480, "enz": 16481, "Ġaer": 16482, "icing": 16483, "ĠHTC": 16484, "Ġdoping": 16485, "ĠAlb": 16486, "Ġsom": 16487, "icia": 16488, "Ġcoroner": 16489, "Ġdamn": 16490, "Ġ119": 16491, "Ġwiped": 16492, "ĠAuditor": 16493, "hern": 16494, "ĠJew": 16495, "endra": 16496, "osp": 16497, "ĠRory": 16498, "Ġshapes": 16499, "ĠPablo": 16500, "Ġforemost": 16501, "ĠHos": 16502, "ĠCunningham": 16503, "145": 16504, "ĠRecovery": 16505, "!!!": 16506, "western": 16507, "Ġimaging": 16508, "ĠRookie": 16509, "ĠMTV": 16510, "Ġunc": 16511, "ĠSporting": 16512, "Ġpatrons": 16513, "ĠCoverage": 16514, "ĠObservatory": 16515, "Ġfishermen": 16516, "ĠProvince": 16517, "ĠAston": 16518, "ĠOsh": 16519, "ĠWeekend": 16520, "Ġrecruits": 16521, "Ġdensity": 16522, "FM": 16523, "ĠGorsuch": 16524, "ĠErie": 16525, "lining": 16526, "Ġshowcased": 16527, "ĠRubio": 16528, "Ġchaotic": 16529, "Ġattractions": 16530, "Ġhug": 16531, "ĠHerbert": 16532, "ĠRespond": 16533, "Ġhappily": 16534, "Ġtor": 16535, "ĠOTHER": 16536, "runner": 16537, "ĠShakespeare": 16538, "Ġstretching": 16539, "ĠJudy": 16540, "wyn": 16541, "ĠCafe": 16542, "Ġgreens": 16543, "ĠHend": 16544, "Ġglam": 16545, "iation": 16546, "ĠKingston": 16547, "Ġincremental": 16548, "Live": 16549, "ĠBraun": 16550, "USS": 16551, "reb": 16552, "Ġimperative": 16553, "Ġsympathy": 16554, "Ġrefuge": 16555, "Ġadministered": 16556, "rance": 16557, "ĠLiberia": 16558, "Ġmobil": 16559, "heads": 16560, "Ġinevitably": 16561, "ĠEugene": 16562, "ĠBerkshire": 16563, "ĠHarbour": 16564, "ĠTrends": 16565, "TB": 16566, "Ġdeficits": 16567, "Ġlistings": 16568, "Ġreadings": 16569, "Ġtumor": 16570, "Ġoffic": 16571, "opy": 16572, "Ġdistracted": 16573, "Ġappropriately": 16574, "ĠWillis": 16575, "Ġskirt": 16576, "ĠTea": 16577, "Ġshades": 16578, "Ġbargaining": 16579, "Ġretention": 16580, "ĠConcert": 16581, "ĠMeteor": 16582, "ĠCustom": 16583, "Ġinputs": 16584, "ĠSah": 16585, "enta": 16586, "Love": 16587, "ĠBurg": 16588, "ĠCynthia": 16589, "ĠMoses": 16590, "ubb": 16591, "Ġpeoples": 16592, "dh": 16593, "ĠFro": 16594, "bean": 16595, "Ġcigarette": 16596, "tta": 16597, "umm": 16598, "Ġphenomenal": 16599, "Ġyelling": 16600, "Ġinaug": 16601, "Ġconven": 16602, "ĠGore": 16603, "request": 16604, "Ġcolonial": 16605, "ĠAleppo": 16606, "Ġdemolition": 16607, "Ġamounted": 16608, "Ġstaggering": 16609, "Ġclips": 16610, "Ġinconsistent": 16611, "ĠMilton": 16612, "ĠWireless": 16613, "ĠReno": 16614, "ĠPerkins": 16615, "Ġunusually": 16616, "Ġmemor": 16617, "Ġhectares": 16618, "Ġlat": 16619, "central": 16620, "ĠDig": 16621, "ĠMarina": 16622, "ĠPartner": 16623, "daily": 16624, "your": 16625, "Reilly": 16626, "Ġpope": 16627, "phy": 16628, "Ġassessing": 16629, "ĠRodrigo": 16630, "wi": 16631, "Ġcompatible": 16632, "imate": 16633, "Ġgentle": 16634, "ĠRhodes": 16635, "Brexit": 16636, "ieve": 16637, "Ġbreaches": 16638, "Ġchopped": 16639, "Ġcancers": 16640, "VEL": 16641, "Ġsluggish": 16642, "ĠUltra": 16643, "ĠUl": 16644, "Ġcrises": 16645, "ONE": 16646, "ĠEquipment": 16647, "Ġcater": 16648, "Ġadjourn": 16649, "Ġreadily": 16650, "ĠRolling": 16651, "ĠBott": 16652, "inel": 16653, "ĠRule": 16654, "Ġgrind": 16655, "ĠHussain": 16656, "ussie": 16657, "Ġdepressed": 16658, "ĠImperial": 16659, "ongo": 16660, "Ġuniforms": 16661, "Ġ117": 16662, "Ġchambers": 16663, "ĠDum": 16664, "ifi": 16665, "ĠBetty": 16666, "ĠTA": 16667, "Ġpromotions": 16668, "itary": 16669, "Ġcried": 16670, "Ġbranding": 16671, "ĠBahamas": 16672, "ĠDat": 16673, "Ġantibiotics": 16674, "ĠAus": 16675, "Ġumbrella": 16676, "Ġgradual": 16677, "Ġaltercation": 16678, "Ġlure": 16679, "ĠJakarta": 16680, "Ġunified": 16681, "chin": 16682, "ettes": 16683, "ĠRwanda": 16684, "ulations": 16685, "Ġbrink": 16686, "Ġbroadcasting": 16687, "ĠArtist": 16688, "Ġrecon": 16689, "Ġaqu": 16690, "ĠServ": 16691, "999": 16692, "ĠParticipants": 16693, "ĠVentures": 16694, "fight": 16695, "Ġactivism": 16696, "Ġstructured": 16697, "Ġportal": 16698, "Ġtendency": 16699, "ĠAssociate": 16700, "Ġcalf": 16701, "ĠOrd": 16702, "ĠTi": 16703, "ĠFrancois": 16704, "uary": 16705, "ĠVik": 16706, "urchase": 16707, "Ġfried": 16708, "Ġbooming": 16709, "Ġparticles": 16710, "amas": 16711, "INA": 16712, "Super": 16713, "supp": 16714, "urring": 16715, "ĠWatts": 16716, "affer": 16717, "ĠDEC": 16718, "Ġroadway": 16719, "border": 16720, "Ġsequ": 16721, "entially": 16722, "ieg": 16723, "Ġcamping": 16724, "Ġ750": 16725, "Ġcycles": 16726, "ĠReese": 16727, "ĠFellow": 16728, "isters": 16729, "ĠVehicle": 16730, "kies": 16731, "ĠJonas": 16732, "Ġfoundations": 16733, "ĠNigel": 16734, "Ġstab": 16735, "Ġcongressman": 16736, "ĠWichita": 16737, "antes": 16738, "Ġprogression": 16739, "Ġditch": 16740, "lik": 16741, "Ġsid": 16742, "Ġele": 16743, "ĠMund": 16744, "Ġstairs": 16745, "lete": 16746, "Ġlingering": 16747, "Ġsadly": 16748, "Ġay": 16749, "Em": 16750, "Ġdeadliest": 16751, "soon": 16752, "Ġtangible": 16753, "Ġabusing": 16754, "Ġcomprises": 16755, "vil": 16756, "ĠBun": 16757, "Ġdoubling": 16758, "Ġcommun": 16759, "Ġslogan": 16760, "Ġloading": 16761, "Ġshallow": 16762, "Ġattributes": 16763, "Che": 16764, "Ġcheering": 16765, "Ġrefuses": 16766, "cam": 16767, "bes": 16768, "hon": 16769, "ĠSpartans": 16770, "cept": 16771, "ĠComputer": 16772, "ĠCanberra": 16773, "ĠWARNING": 16774, "Ġstuffed": 16775, "block": 16776, "ĠJennings": 16777, "ĠAU": 16778, "atin": 16779, "Ġom": 16780, "Ġbachelor": 16781, "Ġprediction": 16782, "ĠWinner": 16783, "agne": 16784, "Ġrob": 16785, "ĠKatherine": 16786, "Ġli": 16787, "ĠHumph": 16788, "ĠPEOPLE": 16789, "IRO": 16790, "Cola": 16791, "Ġguitarist": 16792, "isen": 16793, "ĠHighlights": 16794, "Ġwelcomes": 16795, "Ġprisoner": 16796, "Ġpsychology": 16797, "Ġextradition": 16798, "Ġrou": 16799, "ĠLund": 16800, "Ġthoughtful": 16801, "RY": 16802, "orman": 16803, "Alex": 16804, "Ġlaughter": 16805, "Ġfumble": 16806, "Ġsynthetic": 16807, "Ġdigit": 16808, "ĠRoc": 16809, "ĠFactory": 16810, "ellery": 16811, "ishment": 16812, "ilar": 16813, "ĠEarl": 16814, "ĠSutton": 16815, "ĠJur": 16816, "ĠAllan": 16817, "ĠKoreans": 16818, "uki": 16819, "Ġculinary": 16820, "PU": 16821, "Stock": 16822, "stars": 16823, "ĠDayton": 16824, "beck": 16825, "Ġinstability": 16826, "ĠBring": 16827, "Ġbreeding": 16828, "Ġmiracle": 16829, "bons": 16830, "Ġdonating": 16831, "ĠKick": 16832, "ĠSag": 16833, "afi": 16834, "Ġharassed": 16835, "asm": 16836, "Their": 16837, "inity": 16838, "Ġacademics": 16839, "Ġstatute": 16840, "ĠAmit": 16841, "Ġpressured": 16842, "east": 16843, "\"),": 16844, "iso": 16845, "220": 16846, "Ġairplane": 16847, "ĠMcCabe": 16848, "ctions": 16849, "ĠMesa": 16850, "Ġsensational": 16851, "ĠFE": 16852, "ĠNeigh": 16853, "Ġbribery": 16854, "Ġflaws": 16855, "Ġfemales": 16856, "Ġmisses": 16857, "ĠColor": 16858, "ĠVietnamese": 16859, "ĠMental": 16860, "Unfortunately": 16861, "ĠPont": 16862, "Ġ1940": 16863, "dry": 16864, "ĠGazette": 16865, "ĠAns": 16866, "Ġwhistle": 16867, "Ġsymbolic": 16868, "Ġpossessions": 16869, "ĠDriver": 16870, "Ġbracket": 16871, "ĠReign": 16872, "oji": 16873, "Ġoct": 16874, "Ġtube": 16875, "ĠFelix": 16876, "Ġtranslated": 16877, "Ġpromptly": 16878, "ĠErnest": 16879, "arth": 16880, "Ġdumb": 16881, "Ġinfluences": 16882, "taking": 16883, "Ġprivat": 16884, "erers": 16885, "Ġmalware": 16886, "Ġpredictable": 16887, "Ġtighten": 16888, "Ġheights": 16889, "Ġfairness": 16890, "facing": 16891, "Ġrematch": 16892, "Ġpoet": 16893, "Ġfundamentally": 16894, "Ġcoveted": 16895, "Ġlivelihood": 16896, "ĠABOUT": 16897, "Ġsourced": 16898, "Ġdeferred": 16899, "Ġslashed": 16900, "ĠSchultz": 16901, "Ġtriggering": 16902, "ĠShiv": 16903, "Ġlithium": 16904, "ahead": 16905, "Ġleisure": 16906, "Ġbackpack": 16907, "ilateral": 16908, "ĠNuclear": 16909, "ĠLeone": 16910, "ĠNice": 16911, "Ġenthusiasts": 16912, "September": 16913, "Ġenroll": 16914, "ĠWear": 16915, "erey": 16916, "angs": 16917, "such": 16918, "Ġunpopular": 16919, "Ġdisciplined": 16920, "Ġshrinking": 16921, "ĠBrewing": 16922, "ĠReally": 16923, "Ġdirective": 16924, "175": 16925, "Ġnotifications": 16926, "Ġfortunes": 16927, "ĠHour": 16928, "ĠGan": 16929, "ĠChurchill": 16930, "ĠDodge": 16931, "ĠJeep": 16932, "Ġsour": 16933, "Ġderived": 16934, "Ġft": 16935, "riv": 16936, "Ġlaundry": 16937, "Ġfentanyl": 16938, "ĠSioux": 16939, "achi": 16940, "workers": 16941, "Ġworkload": 16942, "rooms": 16943, "ĠQU": 16944, "ĠTruth": 16945, "Ġdefenses": 16946, "Ġdunk": 16947, "Ĳ": 16948, "Ġderby": 16949, "ĠMotion": 16950, "ĠMayo": 16951, "ĠIke": 16952, "Ġpreferences": 16953, "Ġped": 16954, "elman": 16955, "moon": 16956, "Ġshoots": 16957, "ĠNoel": 16958, "Ġmilit": 16959, "ĠCambodia": 16960, "ĠMLA": 16961, "Ġhonoured": 16962, "fast": 16963, "Ġalgorithms": 16964, "Ġstormed": 16965, "NT": 16966, "Benz": 16967, "Ġvaccines": 16968, "Ġmarching": 16969, "Ġ118": 16970, "ĠWilmington": 16971, "GM": 16972, "coin": 16973, "Ġunderwater": 16974, "ĠClearly": 16975, "Ġorgans": 16976, "mir": 16977, "Ġdenounced": 16978, "pless": 16979, "imal": 16980, "ĠKom": 16981, "Ġfatalities": 16982, "Ġyoungster": 16983, "Ġthirty": 16984, "Ġinternally": 16985, "222": 16986, "Ġdemonstrating": 16987, "Ġbusiest": 16988, "Ġperpetrators": 16989, "Ġstun": 16990, "Both": 16991, "ĠMcCoy": 16992, "gn": 16993, "ĠDalton": 16994, "ĠDAY": 16995, "Ġsacred": 16996, "Ġconsuming": 16997, "Ġ(+": 16998, "ĠPioneer": 16999, "ĠApplications": 17000, "ĠBolt": 17001, "ĠBarkley": 17002, "ĠExpo": 17003, "ĠLore": 17004, "ĠPrivacy": 17005, "ĠHarley": 17006, "Ġtractor": 17007, "Ġtenth": 17008, "ĠHaiti": 17009, "ÃŃn": 17010, "ĠTVs": 17011, "ĠCathedral": 17012, "Ġunite": 17013, "Ġbinding": 17014, "oks": 17015, "ĠJenny": 17016, "Ġcaller": 17017, "ĠIngram": 17018, "ĠPrairie": 17019, "Ġrunoff": 17020, "Ġasserted": 17021, "icit": 17022, "ĠSie": 17023, "102": 17024, "ĠMB": 17025, "Ġobstruction": 17026, "Ġgroom": 17027, "Ġtolerate": 17028, "Ġcans": 17029, "forth": 17030, "Ġvillain": 17031, "Ġdefining": 17032, "ĠFrenchman": 17033, "otte": 17034, "Ġcontr": 17035, "clock": 17036, "onder": 17037, "Ġprolific": 17038, "ĠElectronic": 17039, "ĠSak": 17040, "annie": 17041, "ASS": 17042, "Ġmultinational": 17043, "Associated": 17044, "IZ": 17045, "ĠBelle": 17046, "Ġmand": 17047, "asis": 17048, "Mac": 17049, "Ġpretend": 17050, "ĠCommunication": 17051, "Ġheartbreaking": 17052, "ĠShepherd": 17053, "ĠBIG": 17054, "mph": 17055, "ĠShield": 17056, "ĠLiv": 17057, "ĠStatus": 17058, "Ġbikini": 17059, "Ġranch": 17060, "Ġpeacefully": 17061, "ITCH": 17062, "bourne": 17063, "ĠVariety": 17064, "Ġstationed": 17065, "Ġhed": 17066, "Ġexhausted": 17067, "Ġsurpassed": 17068, "Ġcatalyst": 17069, "Ġsmuggling": 17070, "uating": 17071, "Ġ123": 17072, "Ġdup": 17073, "ĠSul": 17074, "conf": 17075, "jit": 17076, "Ġmaiden": 17077, "asta": 17078, "ĠCalvin": 17079, "borne": 17080, "Ġgrim": 17081, "Ġtort": 17082, "cott": 17083, "olas": 17084, "NR": 17085, "Ġbreakout": 17086, "ĠHun": 17087, "ĠGuatemala": 17088, "Ġhistorian": 17089, "ĠLawyers": 17090, "ĠDisplay": 17091, "Ġobstruct": 17092, "ĠOsborne": 17093, "Ġtherapies": 17094, "ĠAub": 17095, "Ġinjunction": 17096, "stroke": 17097, "Ġseafood": 17098, "Ġhazardous": 17099, "ĠWolver": 17100, "ĠViolence": 17101, "ĠBillion": 17102, "ĠLetter": 17103, "ĠWorldwide": 17104, "Real": 17105, "Ġexpires": 17106, "Ġflawed": 17107, "European": 17108, "Ġrigorous": 17109, "ĠSimilar": 17110, "ĠSurface": 17111, "ĠEF": 17112, "mys": 17113, "ĠFunds": 17114, "ographer": 17115, "Ġtribes": 17116, "Ġspouse": 17117, "Ġunsure": 17118, "aways": 17119, "Ġtrainers": 17120, "arie": 17121, "ĠZar": 17122, "ĠComedy": 17123, "ĠLit": 17124, "ĠNoon": 17125, "Ġgallon": 17126, "Ġconsulate": 17127, "ĠBras": 17128, "iology": 17129, "onies": 17130, "ĠBelichick": 17131, "ĠRoot": 17132, "ĠLux": 17133, "ĠSed": 17134, "ĠTos": 17135, "Ġinherited": 17136, "tw": 17137, "Ġdeaf": 17138, "Ġdriveway": 17139, "jah": 17140, "ĠScientific": 17141, "ĠNottingham": 17142, "both": 17143, "awan": 17144, "Ġnut": 17145, "ĠLebanese": 17146, "ĠAAA": 17147, "ĠSuzuki": 17148, "ĠBU": 17149, "ells": 17150, "Ġspecify": 17151, "ĠNotes": 17152, "Ġvoluntarily": 17153, "ĠMolly": 17154, "Ġoutskirts": 17155, "Ġbehaviors": 17156, "Ġmilitia": 17157, "Ġsplash": 17158, "Ġpersonalized": 17159, "ĠFiat": 17160, "ĠKind": 17161, "ĠTruck": 17162, "py": 17163, "ĠWIN": 17164, "dist": 17165, "itational": 17166, "APP": 17167, "ĠPelicans": 17168, "ĠGam": 17169, "mel": 17170, "Ġmandated": 17171, "Ġbalances": 17172, "ĠWizards": 17173, "iary": 17174, "ĠAvailable": 17175, "Ġkay": 17176, "jin": 17177, "eyed": 17178, "Ġsterling": 17179, "Ġconcealed": 17180, "ĠFedEx": 17181, "ĠPO": 17182, "ĠJacqu": 17183, "anted": 17184, "eme": 17185, "ĠDefensive": 17186, "manship": 17187, "Ġreliever": 17188, "Ġshortstop": 17189, "Ġphot": 17190, "ĠGain": 17191, "ĠConcern": 17192, "due": 17193, "Ġalgorithm": 17194, "fell": 17195, "ĠMountains": 17196, "icians": 17197, "Ġhonoring": 17198, "Ġuploaded": 17199, "Ġtore": 17200, "GH": 17201, "orde": 17202, "ĠCoin": 17203, "ĠAven": 17204, "Ġliterary": 17205, "Before": 17206, "Ġtactic": 17207, "Ġsocially": 17208, "ĠSik": 17209, "Ġthermal": 17210, "Ġhor": 17211, "price": 17212, "Ġrooted": 17213, "arrow": 17214, "Ġcirculating": 17215, "Ġlaughs": 17216, "ĠLines": 17217, "lig": 17218, "Ġjudgement": 17219, "....": 17220, "Ġsewer": 17221, "Ġdancer": 17222, "ĠPens": 17223, "Ġsig": 17224, "ische": 17225, "wives": 17226, "Ġgran": 17227, "ĠBron": 17228, "ĠHyde": 17229, "yards": 17230, "Ġcandidacy": 17231, "Ġhey": 17232, "Ġcontributors": 17233, "ĠUpdated": 17234, "Ġ190": 17235, "Ġhalls": 17236, "Ġemphas": 17237, "ĠCherry": 17238, "Ġrim": 17239, "Ġbilled": 17240, "Ġbaked": 17241, "ĠPopular": 17242, "lb": 17243, "Ġgravity": 17244, "Under": 17245, "Ġreservation": 17246, "organ": 17247, "ĠPict": 17248, "ĠWhitney": 17249, "Ġonboard": 17250, "NEY": 17251, "ĠBreaking": 17252, "Ġflagged": 17253, "rar": 17254, "ĠBasic": 17255, "ĠDomestic": 17256, "ĠPent": 17257, "Ġvigilant": 17258, "Ġzoning": 17259, "Fire": 17260, "Ġcorrected": 17261, "isbury": 17262, "ĠLaure": 17263, "ĠDevon": 17264, "print": 17265, "ĠTopics": 17266, "ĠFuel": 17267, "Ġcirculation": 17268, "ĠPratt": 17269, "Ġskiing": 17270, "Ġtornado": 17271, "dep": 17272, "ĠUnless": 17273, "ifting": 17274, "Ġfool": 17275, "should": 17276, "Ġinspectors": 17277, "Ġprotested": 17278, "Ġba": 17279, "ussia": 17280, "Ġspun": 17281, "grass": 17282, "phone": 17283, "Ġpotato": 17284, "ĠBehind": 17285, "cil": 17286, "Ġconcession": 17287, "Ġapplause": 17288, "ĠChin": 17289, "Ġceremonies": 17290, "pit": 17291, "Ġtraumatic": 17292, "Ġbasics": 17293, "Ġparameters": 17294, "ĠMoz": 17295, "ĠAIDS": 17296, "Ph": 17297, "Ġjudging": 17298, "Ġlecture": 17299, "Ġmunicipality": 17300, "Ġcardiac": 17301, "ogan": 17302, "pir": 17303, "could": 17304, "Channel": 17305, "Ġshattered": 17306, "ĠAV": 17307, "continental": 17308, "chie": 17309, "ibi": 17310, "ĠOy": 17311, "Mon": 17312, "ĠCN": 17313, "WC": 17314, "Ġdistributor": 17315, "ĠSavannah": 17316, "Ġcleaned": 17317, "ĠFlores": 17318, "Ġembarrassed": 17319, "Ġclay": 17320, "Ġvolcano": 17321, "Ġstressful": 17322, "Ġsummoned": 17323, "ĠSeg": 17324, "Ġstatistical": 17325, "ĠShak": 17326, "Ġadequately": 17327, "worthy": 17328, "fighting": 17329, "alan": 17330, "Ġnecessity": 17331, "Ġresidency": 17332, "Ġsober": 17333, "arius": 17334, "ĠTaj": 17335, "mount": 17336, "wards": 17337, "Ġaesthetic": 17338, "Coin": 17339, "ĠDew": 17340, "were": 17341, "SK": 17342, "Ġpowerhouse": 17343, "Ġcleanup": 17344, "ĠWITH": 17345, "ĠHers": 17346, "ĠRao": 17347, "ĠFlyers": 17348, "Ġdominating": 17349, "issued": 17350, "ĠMcGr": 17351, "Ġinsurgency": 17352, "Ġburial": 17353, "ĠPlains": 17354, "ensive": 17355, "ĠPresent": 17356, "Mo": 17357, "Ġnerves": 17358, "Ġsmoothly": 17359, "staff": 17360, "Ġrestoring": 17361, "ĠGeneration": 17362, "Ġcommuters": 17363, "ĠLegend": 17364, "ĠGad": 17365, "lied": 17366, "Ġissuer": 17367, "ĠDozens": 17368, "Ġphases": 17369, "ĠWu": 17370, "ĠTunisia": 17371, "ĠPacers": 17372, "Ġdur": 17373, "ĠIG": 17374, "annon": 17375, "sided": 17376, "Ġvo": 17377, "ĠNI": 17378, "Ġvitamin": 17379, "Ġsoc": 17380, "Ġimmunity": 17381, "Ġgenerates": 17382, "ĠMcGu": 17383, "Ġexplores": 17384, "Ġassistants": 17385, "Ġstems": 17386, "ushed": 17387, "ĠZak": 17388, "ĠOwners": 17389, "Ġvariant": 17390, "ardy": 17391, "ĠNewark": 17392, "ĠCatalonia": 17393, "Ġautonomy": 17394, "Ġgreet": 17395, "Ġawait": 17396, "ĠLuckily": 17397, "ĠTicket": 17398, "ĠSTOR": 17399, "asy": 17400, "Ġincorrect": 17401, "Ġconsisting": 17402, "Ġperspectives": 17403, "ĠQuint": 17404, "Ġtotaling": 17405, "Ġnortheastern": 17406, "Ġcharacterized": 17407, "Ġsurfaces": 17408, "nation": 17409, "Ġprevents": 17410, "ĠSho": 17411, "Ġelectorate": 17412, "Ġshortfall": 17413, "chy": 17414, "aws": 17415, "ĠAddress": 17416, "Ġdefensively": 17417, "quel": 17418, "chester": 17419, "Ġterr": 17420, "ahu": 17421, "lined": 17422, "ĠNev": 17423, "unn": 17424, "Def": 17425, "pc": 17426, "ĠSig": 17427, "Ġnonetheless": 17428, "ĠSundays": 17429, "ĠBAS": 17430, "Ġpolicemen": 17431, "ĠGoal": 17432, "apa": 17433, "Ġrope": 17434, "Ġoutage": 17435, "ĠPaso": 17436, "Ġsadness": 17437, "ĠGrowing": 17438, "ĠKyr": 17439, "Ġale": 17440, "ĠBreitbart": 17441, "ĠVia": 17442, "ĠBrig": 17443, "idence": 17444, "Ġ145": 17445, "quire": 17446, "Ġdistraction": 17447, "ĠOdd": 17448, "ĠSimply": 17449, "ĠNin": 17450, "Ġcompetent": 17451, "ded": 17452, "iper": 17453, "ĠKaty": 17454, "ĠSolomon": 17455, "Ġfeeds": 17456, "ĠMort": 17457, "ĠRica": 17458, "affe": 17459, "Ġcooperating": 17460, "Ġarrivals": 17461, "Ġdelete": 17462, "ĠAth": 17463, "Ġtrustees": 17464, "Ġtub": 17465, "Ġsaga": 17466, "otes": 17467, "ĠCJ": 17468, "Ġexited": 17469, "stakes": 17470, "Ġinflu": 17471, "2000": 17472, "ĠDonovan": 17473, "ĠNur": 17474, "Ġoutline": 17475, "Ġaudition": 17476, "oked": 17477, "ĠJag": 17478, "money": 17479, "Ġcardiovascular": 17480, "song": 17481, "ĠOften": 17482, "ĠGoff": 17483, "ĠOaks": 17484, "Will": 17485, "acon": 17486, "Ġ?": 17487, "Har": 17488, "ĠLambert": 17489, "atoon": 17490, "ĠAF": 17491, "ĠMavericks": 17492, "nia": 17493, "ĠChennai": 17494, "\"},\"": 17495, "Ġpairing": 17496, "mad": 17497, "ause": 17498, "ĠRide": 17499, "111": 17500, "ĠFallon": 17501, "ĠHyder": 17502, "ĠPiper": 17503, "Ġfilmmakers": 17504, "icon": 17505, "ĠBeau": 17506, "Ġbutt": 17507, "lot": 17508, "Ġrifles": 17509, "Ġsunglasses": 17510, "ĠTRA": 17511, "Ġmagnetic": 17512, "arty": 17513, "ĠYo": 17514, "ĠWeight": 17515, "?!": 17516, "ether": 17517, "Ġaspir": 17518, "Ġhunters": 17519, "Ġcontamination": 17520, "Ben": 17521, "political": 17522, "],\"": 17523, "ĠBever": 17524, "Ġmonuments": 17525, "won": 17526, "auc": 17527, "Ġexpressions": 17528, "Ġlakes": 17529, "iao": 17530, "abin": 17531, "Ġpleading": 17532, "Ġdiscounted": 17533, "Ġdisappoint": 17534, "ĠTW": 17535, "craft": 17536, "Ġsocieties": 17537, "ĠAugusta": 17538, "Ġbott": 17539, "Ġmarker": 17540, "ĠWrestling": 17541, "CBC": 17542, "athy": 17543, "ĠAZ": 17544, "Ġfabulous": 17545, "valued": 17546, "Ġoptical": 17547, "Ġshaken": 17548, "OSS": 17549, "ĠImp": 17550, "ĠAUD": 17551, "inals": 17552, "Ġrevital": 17553, "Ġcontroller": 17554, "Ġgrasp": 17555, "uling": 17556, "ĠFrederick": 17557, "ague": 17558, "bull": 17559, "ĠLadies": 17560, "Ġdisruptive": 17561, "Ġbenefiting": 17562, "Ġverge": 17563, "ĠDak": 17564, "Ġgrabs": 17565, "ĠPAC": 17566, "GN": 17567, "ĠMcMahon": 17568, "rob": 17569, "ĠEspecially": 17570, "ĠChrome": 17571, "ĠBundesliga": 17572, "104": 17573, "Ġliberty": 17574, "ĠSF": 17575, "Ġvarieties": 17576, "East": 17577, "Ġgrowers": 17578, "Ġsocialist": 17579, "Ġunemployed": 17580, "AMI": 17581, "Ġtotals": 17582, "ĠGib": 17583, "Ġdefect": 17584, "ĠOrtiz": 17585, "ĠPerfect": 17586, "Ġpraying": 17587, "ISS": 17588, "Ġul": 17589, "Ġthrust": 17590, "osc": 17591, "ĠOtherwise": 17592, "Ġobsessed": 17593, "Ġ650": 17594, "ĠWebsite": 17595, "Ġspectators": 17596, "ĠScout": 17597, "ĠBoone": 17598, "ĠDillon": 17599, "Ġabortions": 17600, "lect": 17601, "utz": 17602, "Ġvillagers": 17603, "Ġaccelerating": 17604, "Ġslap": 17605, "Ġvague": 17606, "Ġjurisdictions": 17607, "League": 17608, "ĠUruguay": 17609, "Ġobstacle": 17610, "Ġmanufactures": 17611, "Ġcampaigned": 17612, "ĠAdvance": 17613, "ĠNort": 17614, "emer": 17615, "Ġ1964": 17616, "Ġirre": 17617, "Ġprog": 17618, "ĠFeatured": 17619, "Ġcommute": 17620, "Ġhandset": 17621, "akis": 17622, "ĠArs": 17623, "tail": 17624, "iker": 17625, "Ġcrafted": 17626, "Ġupl": 17627, "ĠMarcos": 17628, "Looking": 17629, "Ġseated": 17630, "ĠBoat": 17631, "Ġreadiness": 17632, "ĠLLP": 17633, "otechnology": 17634, "facebook": 17635, "ĠScouts": 17636, "ĠEar": 17637, "ĠAdv": 17638, "ĠDemocracy": 17639, "NI": 17640, "oci": 17641, "ĠSnapdragon": 17642, "Saturday": 17643, "ĠPra": 17644, "ĠCoastal": 17645, "ĠVoters": 17646, "ĠLeigh": 17647, "ohn": 17648, "orry": 17649, "Ġtechnicians": 17650, "armed": 17651, "Ġshrink": 17652, "Ġspinning": 17653, "agram": 17654, "320": 17655, "liner": 17656, "ĠContest": 17657, "ĠCountries": 17658, "Ġfarewell": 17659, "ĠCW": 17660, "aris": 17661, "Ġstorytelling": 17662, "Ġpasser": 17663, "Ġsailing": 17664, "control": 17665, "Ġdissent": 17666, "ĠRih": 17667, "Ġedit": 17668, "Ġspoilers": 17669, "itched": 17670, "ĠBentley": 17671, "Ġcant": 17672, "mn": 17673, "ĠMacy": 17674, "Ġindefinitely": 17675, "Ġvill": 17676, "Ġmeth": 17677, "ĠEL": 17678, "Ġoptional": 17679, "Ġremark": 17680, "ĠVanessa": 17681, "Ã£": 17682, "Ġmasks": 17683, "ĠProvincial": 17684, "Ġculprit": 17685, "ĠTol": 17686, "Ġsnack": 17687, "ĠInfinity": 17688, "ĠPub": 17689, "Ġbrakes": 17690, "Ġclar": 17691, "Ġinception": 17692, "love": 17693, "Ġwonders": 17694, "Ġforged": 17695, "ĠCEOs": 17696, "Ġspecifications": 17697, "irst": 17698, "ension": 17699, "ĠMarin": 17700, "det": 17701, "Ġordeal": 17702, "ĠFeed": 17703, "December": 17704, "Ġstrokes": 17705, "fect": 17706, "orial": 17707, "Ġshowcasing": 17708, "Ġstack": 17709, "UAL": 17710, "ĠAlexandra": 17711, "Ġpoison": 17712, "ĠFry": 17713, "ĠCars": 17714, "Ġprototype": 17715, "ĠUSDA": 17716, "ĠIF": 17717, "flows": 17718, "Ġtailored": 17719, "ĠGear": 17720, "Ġmyth": 17721, "Ġplatinum": 17722, "seven": 17723, "founded": 17724, "encing": 17725, "ĠTip": 17726, "ĠMald": 17727, "Ġgeopolitical": 17728, "112": 17729, "Ġenqu": 17730, "ĠNR": 17731, "ĠNadu": 17732, "leen": 17733, "ĠTat": 17734, "Ġcolon": 17735, "ĠSize": 17736, "Ġvis": 17737, "Ġbere": 17738, "ĠAnnie": 17739, "ĠWatkins": 17740, "Ġpumping": 17741, "cur": 17742, "ĠBates": 17743, "Ġslug": 17744, "miss": 17745, "Ġforecasting": 17746, "source": 17747, "Ġacknowledges": 17748, "Ġprosecute": 17749, "Ġtestament": 17750, "Ġcum": 17751, "ems": 17752, "Ġsocks": 17753, "ĠSame": 17754, "Ġcompetitiveness": 17755, "Ġdefinitive": 17756, "Ġintensified": 17757, "Ġsatisfying": 17758, "Ġphysics": 17759, "ĠHarden": 17760, "Ġsubsidy": 17761, "Men": 17762, "ĠPaddock": 17763, "Ġworkouts": 17764, "ĠSaw": 17765, "Ġcrisp": 17766, "ĠBezos": 17767, "ĠVote": 17768, "Ġguiding": 17769, "anged": 17770, "Ġstaple": 17771, "ŀ": 17772, "ules": 17773, "ĠAvengers": 17774, "Ġoptim": 17775, "ĠBuffett": 17776, "Ġtimetable": 17777, "oust": 17778, "HE": 17779, "ĠGrab": 17780, "Have": 17781, "cca": 17782, "Ġwaived": 17783, "Ġretaining": 17784, "Ġaber": 17785, "Ġoffline": 17786, "Ġvigil": 17787, "books": 17788, "ĠRein": 17789, "Ġacknowledging": 17790, "ĠDoyle": 17791, "Ġproteins": 17792, "Ġmixing": 17793, "ĠAlcohol": 17794, "ĠJD": 17795, "Ġsyn": 17796, "Ġthieves": 17797, "Ġhomemade": 17798, "Ġfeminist": 17799, "ĠRoosevelt": 17800, "ĠCoal": 17801, "Ġwishing": 17802, "ĠSIGN": 17803, "ĠLad": 17804, "Ġempathy": 17805, "ĠBrooke": 17806, "ĠMash": 17807, "inations": 17808, "''": 17809, "ulators": 17810, "Ġdrastically": 17811, "Ġfloral": 17812, "ĠGuild": 17813, "Ġundercover": 17814, "ĠLaboratory": 17815, "ĠRank": 17816, "Ġrestraining": 17817, "Ġparagraph": 17818, "Ġpersona": 17819, "ĠEmployment": 17820, "ogs": 17821, "ĠGw": 17822, "ĠMedal": 17823, "Ġwildly": 17824, "fare": 17825, "ĠCNBC": 17826, "photo": 17827, "Ġtransforming": 17828, "Ġtermination": 17829, "still": 17830, "INT": 17831, "Ġbal": 17832, "ĠEconom": 17833, "ĠLarson": 17834, "Ġheck": 17835, "Ġquantitative": 17836, "Ġemergence": 17837, "esta": 17838, "Ġknot": 17839, "Ġwhale": 17840, "ĠðŁĺ": 17841, "Ġperimeter": 17842, "Ġempowerment": 17843, "Ġmg": 17844, "Ġrents": 17845, "Ġrefreshing": 17846, "Ġleasing": 17847, "Ġpatents": 17848, "andi": 17849, "Ġfathers": 17850, "Ġunse": 17851, "Ġprocessors": 17852, "Down": 17853, "Ġreversal": 17854, "veh": 17855, "andal": 17856, "ĠKov": 17857, "Blue": 17858, "Ġspecializes": 17859, "Link": 17860, "ĠConsidering": 17861, "ĠEdmund": 17862, "Ġneo": 17863, "agger": 17864, "rg": 17865, "Ġseverity": 17866, "Ġcour": 17867, "RL": 17868, "ĠTeresa": 17869, "Ġgallons": 17870, "Ġacquitted": 17871, "Ġaccompl": 17872, "Ġcracks": 17873, "Ġsciences": 17874, "Club": 17875, "Ġpredicts": 17876, "ĠVu": 17877, "Ġhints": 17878, "ĠZack": 17879, "Ġrefurb": 17880, "Ġdestabil": 17881, "ĠSamar": 17882, "ĠInfo": 17883, "fs": 17884, "Ġratios": 17885, "Ġinherent": 17886, "ĠContinental": 17887, "Ġtreasure": 17888, "Ġcaucus": 17889, "Ġenact": 17890, "orporated": 17891, "ineries": 17892, "Ġtastes": 17893, "main": 17894, "Ġsq": 17895, "ickson": 17896, "corruption": 17897, "ulture": 17898, "ĠGoodman": 17899, "ĠLing": 17900, "ĠSup": 17901, "Ġexposing": 17902, "immers": 17903, "Ġresponds": 17904, "heimer": 17905, "Air": 17906, "ĠFigures": 17907, "Ġlongstanding": 17908, "ĠAnalytics": 17909, "Ġenforced": 17910, "Ġnickname": 17911, "Ġclinch": 17912, "ĠCarpenter": 17913, "ĠPharma": 17914, "Ġconstructive": 17915, "Ġgel": 17916, "ĠSham": 17917, "ĠTOP": 17918, "ĠDerrick": 17919, "Ã¶r": 17920, "birds": 17921, "ĠTong": 17922, "ĠBatman": 17923, "ĠRouhani": 17924, "ĠOlive": 17925, "ĠRiv": 17926, "Ġdessert": 17927, "Ġguides": 17928, "Ġsag": 17929, "Ġchemotherapy": 17930, "Ġslept": 17931, "ĠFranc": 17932, "ĠDunk": 17933, "writers": 17934, "ĠÃĹ": 17935, "Ġ401": 17936, "Ġoutfielder": 17937, "ĠHamburg": 17938, "izu": 17939, "Ġscr": 17940, "Ġcomparisons": 17941, "Ġwhites": 17942, "Ġtraits": 17943, "Ġcollateral": 17944, "LEY": 17945, "ideshow": 17946, "Ġstatutory": 17947, "Ġruin": 17948, "Ġsituated": 17949, "tem": 17950, "Ġinject": 17951, "rage": 17952, "550": 17953, "Ġfactions": 17954, "ĠNaomi": 17955, "cutting": 17956, "Ġcommunicating": 17957, "Ġrailroad": 17958, "Ġsparking": 17959, "Ġrespiratory": 17960, "ĠWebster": 17961, "ĠCarbon": 17962, "Ġundertaking": 17963, "Ġcomposer": 17964, "ĠFigure": 17965, "Ġspecified": 17966, "Video": 17967, "uber": 17968, "Ġsexuality": 17969, "lected": 17970, "ĠBurger": 17971, "ĠCards": 17972, "SR": 17973, "ĠLie": 17974, "Ġrecount": 17975, "Ġexceeding": 17976, "Ġquoting": 17977, "ĠJama": 17978, "ĠVictorian": 17979, "Ġsway": 17980, "ĠGes": 17981, "ĠSI": 17982, "ĠKazakhstan": 17983, "Ġaccusation": 17984, "etr": 17985, "Ah": 17986, "Ġproc": 17987, "Ġlamb": 17988, "ĠMorales": 17989, "ĠLily": 17990, "Ġderail": 17991, "Ġcontributes": 17992, "iddle": 17993, "ĠConcord": 17994, "Ġelectr": 17995, "Ġequip": 17996, "Ġquantum": 17997, "Ġthereafter": 17998, "Ġarrange": 17999, "Ġraided": 18000, "ĠMove": 18001, "ĠSang": 18002, "ĠGaming": 18003, "Ġbiology": 18004, "ĠAmnesty": 18005, "Ġdemise": 18006, "ĠBarton": 18007, "Ġqualifier": 18008, "ANI": 18009, "Ġundersc": 18010, "Ġroyalty": 18011, "ĠINC": 18012, "Ġsne": 18013, "ariat": 18014, "ĠWan": 18015, "Ġcluster": 18016, "quin": 18017, "Ġwhales": 18018, "ĠFear": 18019, "ĠBrew": 18020, "Ġdeport": 18021, "airs": 18022, "Ġcensus": 18023, "OUS": 18024, "Ġrespectful": 18025, "bone": 18026, "Ġwaivers": 18027, "friend": 18028, "Ġsystemic": 18029, "ĠDion": 18030, "James": 18031, "ĠAdmission": 18032, "Ġstigma": 18033, "ĠTIME": 18034, "Ġunderpin": 18035, "ĠWitnesses": 18036, "Ġdigs": 18037, "Ġgenocide": 18038, "Ġstaging": 18039, "rolled": 18040, "Ġspecially": 18041, "oop": 18042, "Ġbaseline": 18043, "ĠRF": 18044, "avis": 18045, "Ġvocals": 18046, "COL": 18047, "LD": 18048, "Ġimpending": 18049, "ĠCaldwell": 18050, "Ġaluminium": 18051, "Ġstra": 18052, "ĠTayyip": 18053, "Ġadmissions": 18054, "falls": 18055, "Ġrealizing": 18056, "oen": 18057, "ĠRV": 18058, "ĠMog": 18059, "Ġadvocating": 18060, "ĠPepper": 18061, "lived": 18062, "ĠWick": 18063, "Facebook": 18064, "ĠSpect": 18065, "Ġshout": 18066, "Ġfractured": 18067, "vet": 18068, "Ġ1966": 18069, "Ġcompensate": 18070, "ĠVolume": 18071, "Ġcategor": 18072, "ĠHuntington": 18073, "Free": 18074, "OUGH": 18075, "local": 18076, "Sch": 18077, "uti": 18078, "Ġburger": 18079, "Ġbush": 18080, "Ġimpacting": 18081, "Ġfrost": 18082, "tti": 18083, "ĠFresno": 18084, "onz": 18085, "shaw": 18086, "ĠLibyan": 18087, "Ġassert": 18088, "ĠLegacy": 18089, "ĠIE": 18090, "ĠKinder": 18091, "ĠHorizon": 18092, "Ġtum": 18093, "Ġsignaled": 18094, "ĠFors": 18095, "Ġspeedy": 18096, "rang": 18097, "ĠFT": 18098, "Ġselecting": 18099, "Ġpale": 18100, "WD": 18101, "Ġprobability": 18102, "OUND": 18103, "istrate": 18104, "Ġsens": 18105, "ocating": 18106, "Ġinterpret": 18107, "Ġpuzzle": 18108, "Ġinland": 18109, "Ġmanipulation": 18110, "Sal": 18111, "Ġfulfilling": 18112, "ĠMcMaster": 18113, "Make": 18114, "jun": 18115, "giving": 18116, "ĠNiagara": 18117, "Ġscholars": 18118, "ALT": 18119, "ĠSteam": 18120, "omin": 18121, "ĠSau": 18122, "ĠDowning": 18123, "Ġgy": 18124, "ĠTit": 18125, "ĠLav": 18126, "ĠPepsi": 18127, "Ġdumping": 18128, "ĠDetect": 18129, "ĠTDs": 18130, "ĠKob": 18131, "ĠSY": 18132, "Ġpioneer": 18133, "Ġ_": 18134, "Ġclarified": 18135, "ĠTests": 18136, "opic": 18137, "ĠMN": 18138, "ĠBowman": 18139, "umin": 18140, "Ġwidow": 18141, "Ġrallying": 18142, "ĠPull": 18143, "Ġprojection": 18144, "Ġescalation": 18145, "Ġlibraries": 18146, "ĠFounder": 18147, "ĠHugo": 18148, "ĠStyle": 18149, "Ġfreelance": 18150, "Ġlisteners": 18151, "Ġdiscovering": 18152, "ĠPlans": 18153, "Ġfranchises": 18154, "ĠPam": 18155, "Ġfarther": 18156, "UI": 18157, "opers": 18158, "103": 18159, "ublished": 18160, "keys": 18161, "aky": 18162, "Ġinnov": 18163, "¦": 18164, "ĠDrum": 18165, "Ġwraps": 18166, "ĠCongressman": 18167, "ĠVenus": 18168, "fake": 18169, "ĠBronx": 18170, "ĠDinner": 18171, "faced": 18172, "Ġbackward": 18173, "inge": 18174, "Ġarsenal": 18175, "ĠAce": 18176, "uden": 18177, "fre": 18178, "Ġspa": 18179, "ĠSaunders": 18180, "ĠMatter": 18181, "ĠSpons": 18182, "Ġconsultations": 18183, "ĠRuss": 18184, "Ġsculpture": 18185, "Ġuncommon": 18186, "Nov": 18187, "pg": 18188, "otherapy": 18189, "Ġgol": 18190, "ĠBlazers": 18191, "Ġadvises": 18192, "ĠRegulatory": 18193, "ĠBoyle": 18194, "Äģ": 18195, "Ġcuisine": 18196, "Ġencouragement": 18197, "yp": 18198, "eny": 18199, "ĠOrchestra": 18200, "ĠChicken": 18201, "Ġ1965": 18202, "ĠPret": 18203, "ĠCooperation": 18204, "ĠDevices": 18205, "ĠRodney": 18206, "ĠHonduras": 18207, "ĠEgg": 18208, "Ġchurn": 18209, "Ġclutch": 18210, "ĠBernstein": 18211, "Ġain": 18212, "Ġformidable": 18213, "ĠFacility": 18214, "Ġpag": 18215, "mons": 18216, "bol": 18217, "Ġliteracy": 18218, "Ġsubmissions": 18219, "ĠHulu": 18220, "ĠConstitutional": 18221, "ĠIsh": 18222, "ĠPaula": 18223, "olve": 18224, "Ġabundance": 18225, "ĠAla": 18226, "ĠEcuador": 18227, "Ġreconstruction": 18228, "Ġcrush": 18229, "reek": 18230, "ĠÂŃ": 18231, "ibo": 18232, "Ġpracticed": 18233, "Ġpac": 18234, "rett": 18235, "Ġpasta": 18236, "Ġresp": 18237, "ĠFlag": 18238, "pal": 18239, "Ġcommenting": 18240, "Ġrecap": 18241, "âĢĶâĢĶ": 18242, "ĠToy": 18243, "ĠMeredith": 18244, "Ġreceipt": 18245, "Ġseparating": 18246, "ĠMap": 18247, "Ġmogul": 18248, "ĠBurlington": 18249, "Ġger": 18250, "Ġcoordinate": 18251, "grad": 18252, "Ġescalated": 18253, "Ġproceeded": 18254, "turned": 18255, "Ġupt": 18256, "hum": 18257, "ĠWere": 18258, "Whether": 18259, "Ġenjoyable": 18260, "energy": 18261, "Ġprohibit": 18262, "Ġhurdle": 18263, "Ġdivorced": 18264, "Ġcommentator": 18265, "GT": 18266, "ATH": 18267, "Ġtravellers": 18268, "Ġpopulated": 18269, "ĠVo": 18270, "ĠRebels": 18271, "Ġspurred": 18272, "Ġideological": 18273, "Ġelephant": 18274, "keyes": 18275, "Pat": 18276, "Ġlinger": 18277, "Ġreps": 18278, "Ġcocktails": 18279, "ĠKristen": 18280, "istically": 18281, "Ġgunmen": 18282, "Ġ1920": 18283, "Ġquart": 18284, "National": 18285, "Ġexceptions": 18286, "kat": 18287, "priced": 18288, "ĠHarold": 18289, "ĠPistons": 18290, "Ġcompounds": 18291, "Ġmouse": 18292, "Ġexhibits": 18293, "ĠBurk": 18294, "Ġclassmates": 18295, "Ġcirculated": 18296, "Ġattributable": 18297, "ĠBaton": 18298, "Ġorganizer": 18299, "Ġdurable": 18300, "Ġsingers": 18301, "ĠOman": 18302, "Ġhydrogen": 18303, "Ġslash": 18304, "Ġaccidental": 18305, "ĠAbrams": 18306, "KS": 18307, "itty": 18308, "Ġrust": 18309, "Ġselections": 18310, "porting": 18311, "ĠEmanuel": 18312, "XX": 18313, "ĠThornton": 18314, "Ġcolumns": 18315, "Ġsentiments": 18316, "fun": 18317, "Ġplight": 18318, "ĠSister": 18319, "ĠMaggie": 18320, "hya": 18321, "Daniel": 18322, "Ġplung": 18323, "orio": 18324, "ĠYorker": 18325, "ĠSaturdays": 18326, "Ġloc": 18327, "aye": 18328, "illon": 18329, "ĠConsulting": 18330, "pled": 18331, "ĠZin": 18332, "ĠFarms": 18333, "ĠGiuliani": 18334, "ĠMIN": 18335, "ĠHanson": 18336, "ĠComplete": 18337, "ourke": 18338, "oche": 18339, "ĠJord": 18340, "Ġprofessors": 18341, "ĠWILL": 18342, "ĠCron": 18343, "Ġdorm": 18344, "Ġcracking": 18345, "tur": 18346, "ORS": 18347, "Ant": 18348, "Ġdeduction": 18349, "ĠSIM": 18350, "igue": 18351, "ĠValent": 18352, "ĠEthereum": 18353, "ĠSunny": 18354, "ĠExtra": 18355, "ivan": 18356, "ĠFo": 18357, "Ġleases": 18358, "ibe": 18359, "Ġ1800": 18360, "Ġslapped": 18361, "emaker": 18362, "Ġfa": 18363, "rien": 18364, "ĠPeriod": 18365, "ĠES": 18366, "ĠBlu": 18367, "Ġpreserving": 18368, "Ġsmarter": 18369, "mans": 18370, "Ġgest": 18371, "zu": 18372, "nu": 18373, "Ġdivest": 18374, "roc": 18375, "ĠFlood": 18376, "Given": 18377, "ĠNorton": 18378, "Ġgranting": 18379, "Ġdealings": 18380, "Ġgeographic": 18381, "esa": 18382, "Ġcub": 18383, "Ġcriticizing": 18384, "ĠCub": 18385, "Ġsurroundings": 18386, "ĠInternal": 18387, "Ġsle": 18388, "Ġcrushing": 18389, "ĠPP": 18390, "izations": 18391, "ĠAbdel": 18392, "Joe": 18393, "ĠVisitors": 18394, "ĠCarly": 18395, "INGTON": 18396, "ĠGC": 18397, "ĠWB": 18398, "Ġgently": 18399, "·": 18400, "though": 18401, "ĠAlto": 18402, "Ġresting": 18403, "ĠPerson": 18404, "ĠTon": 18405, "Ġbore": 18406, "ĠClar": 18407, "Ġmot": 18408, "Ġbathrooms": 18409, "ĠTypically": 18410, "Ġdisconnect": 18411, "Ġtightly": 18412, "ĠHarvest": 18413, "ĠHed": 18414, "ĠGermans": 18415, "atar": 18416, "Ġkeynote": 18417, "Ġimproper": 18418, "fil": 18419, "Ġintens": 18420, "iev": 18421, "Ġmedi": 18422, "Ġtenant": 18423, "Ġfootsteps": 18424, "uli": 18425, "Ġlegalization": 18426, "106": 18427, "ĠLexington": 18428, "folio": 18429, "ĠÂ½": 18430, "ĠRita": 18431, "Ġbattered": 18432, "inka": 18433, "ĠJavaScript": 18434, "ĠMusical": 18435, "ĠTalent": 18436, "Ġlounge": 18437, "Ġintimidation": 18438, "ikh": 18439, "ĠFam": 18440, "Ġtherapeutic": 18441, "Ġbalancing": 18442, "Ġrocky": 18443, "liners": 18444, "ĠPredators": 18445, "Ġregistering": 18446, "Ġdiligence": 18447, "ĠRover": 18448, "ĠDot": 18449, "Ġterminated": 18450, "ĠEdu": 18451, "Ġcharming": 18452, "ĠPLAY": 18453, "ĠFact": 18454, "ĠCi": 18455, ").\"": 18456, "ĠWrestle": 18457, "hun": 18458, "Ġopenings": 18459, "Ġfou": 18460, "Ġ126": 18461, "spe": 18462, "ĠAW": 18463, "Ġbud": 18464, "ĠTemper": 18465, "ĠOrthodox": 18466, "Ġprogressed": 18467, "tre": 18468, "Ġtasting": 18469, "Ġscrutin": 18470, "ĠLima": 18471, "Ġlayout": 18472, "Ġlitter": 18473, "ijk": 18474, "ĠParkinson": 18475, "ĠAnfield": 18476, "Ġdevelopmental": 18477, "Ġheaven": 18478, "ĠWoodward": 18479, "index": 18480, "Ġpistol": 18481, "Ġreson": 18482, "ĠWS": 18483, "Ġemb": 18484, "ĠLap": 18485, "ĠPle": 18486, "lington": 18487, "ĠSit": 18488, "Ġabruptly": 18489, "ĠSenegal": 18490, "ĠYates": 18491, "aceutical": 18492, "ĠJak": 18493, "ĠHastings": 18494, "iste": 18495, "ĠDB": 18496, "ĠAgent": 18497, "Ġpreservation": 18498, "ĠLank": 18499, "ĠSuffolk": 18500, "Ġboo": 18501, "essed": 18502, "Ġempowering": 18503, "enne": 18504, "Ġrecycled": 18505, "Ġstrateg": 18506, "Ġbrake": 18507, "135": 18508, "ĠStef": 18509, "ĠFlake": 18510, "ĠGregg": 18511, "ĠRent": 18512, "Ġinstallment": 18513, "FW": 18514, "ĠCran": 18515, "obo": 18516, "ml": 18517, "ĠJade": 18518, "Ġaccuses": 18519, "ĠNvidia": 18520, "Ġburg": 18521, "High": 18522, "Ġbothered": 18523, "ĠBenn": 18524, "Ġinterrupted": 18525, "Ġtrek": 18526, "Ġserv": 18527, "Ġpatron": 18528, "Ġdictator": 18529, "owa": 18530, "jad": 18531, "ĠTulsa": 18532, "Ġboil": 18533, "Ġdisplaying": 18534, "Ġcinem": 18535, "awaited": 18536, "¸": 18537, "Ġreacts": 18538, "ĠDee": 18539, "ĠGron": 18540, "igation": 18541, "Ġservic": 18542, "capt": 18543, "Ġinsane": 18544, "ĠVeteran": 18545, "umen": 18546, "End": 18547, "ĠCream": 18548, "Ġextremism": 18549, "ĠMalone": 18550, "Col": 18551, "Ġsafeguard": 18552, "Ġtomatoes": 18553, "die": 18554, "Ġchamp": 18555, "zero": 18556, "ĠPRES": 18557, "Ġchoir": 18558, "Ġpediatric": 18559, "Ġprivileged": 18560, "Ġdownstream": 18561, "Business": 18562, "ĠFighting": 18563, "atable": 18564, "Ġsums": 18565, "Ġinsult": 18566, "arten": 18567, "ĠWikiLeaks": 18568, "Ġpads": 18569, "Ġretali": 18570, "ĠHunts": 18571, "Ġindie": 18572, "ĠShields": 18573, "ĠMortgage": 18574, "oses": 18575, "ampton": 18576, "ĠVideos": 18577, "ĠPER": 18578, "itionally": 18579, "ĠKimmel": 18580, "sum": 18581, "trade": 18582, "acity": 18583, "marked": 18584, "ĠAngus": 18585, "Ġtemper": 18586, "Ġseizure": 18587, "Ġfictional": 18588, "utton": 18589, "eva": 18590, "Rs": 18591, "Ġintra": 18592, "ĠRequest": 18593, "ppe": 18594, "ĠeBay": 18595, "ĠUSS": 18596, "Ġ1500": 18597, "Ġpossessing": 18598, "Ġbacon": 18599, "ĠSexual": 18600, "ĠBuff": 18601, "Ġslaughter": 18602, "Ġjur": 18603, "zhou": 18604, "suit": 18605, "ĠCha": 18606, "ĠBuk": 18607, "crime": 18608, "ĠEasy": 18609, "ĠChain": 18610, "aq": 18611, "ĠPall": 18612, "flation": 18613, "225": 18614, "oup": 18615, "109": 18616, "ĠMcKenzie": 18617, "Ġclearer": 18618, "ĠDogs": 18619, "oration": 18620, "Ġsubs": 18621, "Follow": 18622, "ĠShirley": 18623, "Ġadjusting": 18624, "ĠEFF": 18625, "Ġflipped": 18626, "Ġconform": 18627, "ĠLaurent": 18628, "Ġcircular": 18629, "ĠNOR": 18630, "Ġmort": 18631, "Ġtexture": 18632, "avour": 18633, "Ġflex": 18634, "ĠHedge": 18635, "ðŁĺ": 18636, "Ġtrophies": 18637, "ĠINV": 18638, "Ġboast": 18639, "ĠTyr": 18640, "ĠNichols": 18641, "ĠSpa": 18642, "Ġcheered": 18643, "Ġprey": 18644, "reach": 18645, "Ġbreached": 18646, "ĠRegions": 18647, "ĠLyft": 18648, "ĠTul": 18649, "ĠKore": 18650, "Ġendure": 18651, "ĠCover": 18652, "\").": 18653, "ĠSavage": 18654, "Ã¨re": 18655, "reens": 18656, "Ġnic": 18657, "sector": 18658, "Ġweaknesses": 18659, "Ġreboot": 18660, "Ġ210": 18661, "Ġimagery": 18662, "ĠFrem": 18663, "Ġclue": 18664, "ĠLars": 18665, "Ġfaction": 18666, "hetic": 18667, "Ġallied": 18668, "ĠMarvin": 18669, "Ġmethodology": 18670, "ĠTN": 18671, "Ġutter": 18672, "Ġ270": 18673, "ĠVolvo": 18674, "oline": 18675, "ĠACLU": 18676, "Ġindirect": 18677, "Ġminer": 18678, "ĠBale": 18679, "ĠStrange": 18680, "ĠFuller": 18681, "Ġexpelled": 18682, "ĠTropical": 18683, "Ġremotely": 18684, "ĠTIM": 18685, "Ġinnocence": 18686, "Ġconfined": 18687, "Ġfares": 18688, "Ġprevalent": 18689, "Ġdesp": 18690, "House": 18691, "azar": 18692, "Ġgestures": 18693, "ĠCES": 18694, "ĠDM": 18695, "eal": 18696, "ĠÐ": 18697, "Ġburnt": 18698, "Ġframed": 18699, "ĠDani": 18700, "Ġhol": 18701, "ĠCannes": 18702, "ĠHayden": 18703, "Ġwardrobe": 18704, "ĠAssange": 18705, "ĠSamp": 18706, "bay": 18707, "sky": 18708, "ĠHence": 18709, "ĠGrizzlies": 18710, "rates": 18711, "laws": 18712, "ĠMandela": 18713, "ĠHoover": 18714, "rics": 18715, "charged": 18716, "Ġexclude": 18717, "Ġpassive": 18718, "Ġcontinuation": 18719, "Ġblunt": 18720, "Ġvac": 18721, "ĠEmerging": 18722, "rench": 18723, "tv": 18724, "ĠHollow": 18725, "ĠOC": 18726, "Ġadvisors": 18727, "Ġrendered": 18728, "ĠBernardino": 18729, "ĠSupporters": 18730, "ronic": 18731, "Ġchancellor": 18732, "Ġ1963": 18733, "Ġuranium": 18734, "Ġak": 18735, "ĠOptions": 18736, "ermott": 18737, "ĠBerger": 18738, "ibia": 18739, "Ġexplosions": 18740, "Ġimpairment": 18741, "Ġhail": 18742, "Ġalley": 18743, "Ġcruelty": 18744, "ĠClarence": 18745, "Ġvariations": 18746, "Ġrealm": 18747, "Ġrenovations": 18748, "ĠNorwich": 18749, "Ġbelongings": 18750, "Ġmerchants": 18751, "ĠMinisters": 18752, "ĠDodd": 18753, "Ġviewer": 18754, "Ġneutrality": 18755, "quer": 18756, "ĠPrinceton": 18757, "dead": 18758, "arest": 18759, "GET": 18760, "ĠCanadiens": 18761, "ĠIgn": 18762, "clear": 18763, "Mal": 18764, "ĠBridges": 18765, "ĠHayward": 18766, "Ġremarked": 18767, "ingle": 18768, "Ġsob": 18769, "Ġdepart": 18770, "beans": 18771, "Ġpreserved": 18772, "ĠFairfax": 18773, "Ġforgot": 18774, "ĠBeh": 18775, "Rob": 18776, "Ġcooperative": 18777, "ullah": 18778, "Ġmates": 18779, "Ġrang": 18780, "Ġthigh": 18781, "Ġabducted": 18782, "Ġchaired": 18783, "ĠHearts": 18784, "Ġidentifies": 18785, "ĠBuckingham": 18786, "ijn": 18787, "ĠJab": 18788, "Ġclashed": 18789, "feed": 18790, "sites": 18791, "ĠCareer": 18792, "exp": 18793, "ĠBuccaneers": 18794, "scape": 18795, "Ġupdating": 18796, "Ġintentional": 18797, "ĠGuam": 18798, "ĠBreakfast": 18799, "ĠHag": 18800, "Media": 18801, "Ġtapping": 18802, "Ġpics": 18803, "Ġeaten": 18804, "Ġpremise": 18805, "Kim": 18806, "ĠStorage": 18807, "Ġextensively": 18808, "Ġoutrageous": 18809, "ĠSadly": 18810, "Global": 18811, "Â¢": 18812, "leaning": 18813, "CM": 18814, "Ġeasiest": 18815, "ument": 18816, "Ġ122": 18817, "Ġdaunting": 18818, "ISE": 18819, "Ġsunset": 18820, "Ġreset": 18821, "Ġbent": 18822, "Trust": 18823, "ĠCaleb": 18824, "ĠRut": 18825, "ĠBast": 18826, "ETS": 18827, "iencies": 18828, "Ġpu": 18829, "ature": 18830, "Ġrealities": 18831, "omi": 18832, "Ġsoda": 18833, "Ġunveil": 18834, "ĠGoldberg": 18835, "opes": 18836, "Ġuprising": 18837, "ĠMR": 18838, "Ġendorse": 18839, "Ġsail": 18840, "Ġconverting": 18841, "Ġglamorous": 18842, "ĠHollande": 18843, "108": 18844, "isky": 18845, "Ġcushion": 18846, "240": 18847, "Ġadventures": 18848, "Ġantitrust": 18849, "ĠStockholm": 18850, "pace": 18851, "ĠVald": 18852, "ĠTransfer": 18853, "ERT": 18854, "ĠMcInt": 18855, "Ġsurging": 18856, "ogn": 18857, "Ġlauded": 18858, "ĠZam": 18859, "ĠRough": 18860, "TOR": 18861, "Ġwed": 18862, "Ġorigins": 18863, "ĠEld": 18864, "oso": 18865, "Ġsupplying": 18866, "ĠPetty": 18867, "ĠTwe": 18868, "ĠDenise": 18869, "ĠBec": 18870, "Ġbehave": 18871, "Ġ121": 18872, "estone": 18873, "ĠBoulder": 18874, "ĠBlackhawks": 18875, "ĠWyatt": 18876, "Ġfiguring": 18877, "ĠDeborah": 18878, "agi": 18879, "significant": 18880, "Ġasthma": 18881, "Ġmessy": 18882, "mpire": 18883, "Ġax": 18884, "Ġaspiring": 18885, "ĠNH": 18886, "ĠGina": 18887, "heavy": 18888, "ĠVick": 18889, "ÃŃs": 18890, "something": 18891, "Ġbodily": 18892, "Ġunauthorized": 18893, "ĠActually": 18894, "ĠOH": 18895, "Ġmicrophone": 18896, "allah": 18897, "Ġrampant": 18898, "Ġrelocated": 18899, "Ġwidening": 18900, "ĠCait": 18901, "nel": 18902, "ĠBlackBerry": 18903, "Ġprofessionally": 18904, "ĠInterestingly": 18905, "Ġbarbecue": 18906, "Ġresisting": 18907, "ĠNunes": 18908, "disc": 18909, "Ġgroundbreaking": 18910, "orable": 18911, "ĠRegulation": 18912, "Ġborrowed": 18913, "Ġleaking": 18914, "Ġlengths": 18915, "Ġunveiling": 18916, "houses": 18917, "Ġ155": 18918, "ĠBillboard": 18919, "icion": 18920, "Times": 18921, "ĠZoe": 18922, "ĠAbby": 18923, "bus": 18924, "ĠMinutes": 18925, "ributed": 18926, "Ġparap": 18927, "Ġfertil": 18928, "ABC": 18929, "ĠIsle": 18930, "Ġtherapist": 18931, "Ġgubernatorial": 18932, "ĠAust": 18933, "ĠLoan": 18934, "Bo": 18935, "ĠNRL": 18936, "rag": 18937, "Clear": 18938, "Ġrevision": 18939, "Ġflesh": 18940, "BD": 18941, "iji": 18942, "Ġproductions": 18943, "Ġcoconut": 18944, "ĠMcCorm": 18945, "ĠDash": 18946, "Ġgeography": 18947, "hearted": 18948, "Ġarson": 18949, "Ġgoaltender": 18950, "Ġbelly": 18951, "Ġqualifications": 18952, "ĠActiv": 18953, "Ġhooked": 18954, "ĠHungarian": 18955, "Ġprotocols": 18956, "inking": 18957, "Ġfronts": 18958, "ĠKuala": 18959, "ĠToys": 18960, "ĠFitness": 18961, "Ġwarfare": 18962, "Ġoutp": 18963, "ĠQuestions": 18964, "Ġwel": 18965, "ĠShan": 18966, "ĠMorton": 18967, "ĠRomero": 18968, "Ġglance": 18969, "ĠTay": 18970, "Ġsneakers": 18971, "ĠSymphony": 18972, "Ġinspect": 18973, "enna": 18974, "Nobody": 18975, "Ġscrapped": 18976, "ĠDeVos": 18977, "ĠDominican": 18978, "Ġplanets": 18979, "anova": 18980, "Ġnotify": 18981, "Ġincurred": 18982, "Ġunders": 18983, "Ġdetainees": 18984, "ĠMarriott": 18985, "electric": 18986, "ĠKes": 18987, "union": 18988, "ĠWatt": 18989, "ATING": 18990, "Ġslipping": 18991, "Ġraft": 18992, "Ġresisted": 18993, "Ġcred": 18994, "tern": 18995, "Ġflurry": 18996, "Line": 18997, "Ġconsulted": 18998, "Ġanalyzing": 18999, "107": 19000, "ĠWide": 19001, "¶": 19002, "human": 19003, "ĠFEMA": 19004, "Ġsmash": 19005, "Ġcorps": 19006, "Ġbarric": 19007, "Ġcollar": 19008, "ĠTB": 19009, "without": 19010, "ĠCanucks": 19011, "Ġneedle": 19012, "ĠSidney": 19013, "ĠLauderdale": 19014, "Ġglove": 19015, "ilee": 19016, "pic": 19017, "Ġbenef": 19018, "ĠHydro": 19019, "ĠDisc": 19020, "ĠArg": 19021, "Ġtermin": 19022, "Ġsympath": 19023, "Ġpest": 19024, "ĠCoff": 19025, "Ġadvancement": 19026, "social": 19027, "pol": 19028, "ĠEmails": 19029, "Ġstacked": 19030, "ibly": 19031, "ĠAlbion": 19032, "Ġfist": 19033, "hero": 19034, "ĠMarian": 19035, "asia": 19036, "Ġtownship": 19037, "Ġslick": 19038, "Ġmodeling": 19039, "achers": 19040, "ĠArgent": 19041, "ĠSUN": 19042, "arde": 19043, "Ġpinned": 19044, "Ġhitters": 19045, "Ġdare": 19046, "ictions": 19047, "arily": 19048, "Ġsting": 19049, "Ġprimaries": 19050, "appointed": 19051, "Ġformats": 19052, "Ġglitter": 19053, "Ġpatches": 19054, "Ġstrategically": 19055, "Ġaka": 19056, "Ġyielded": 19057, "BY": 19058, "Ġjeopard": 19059, "ĠVand": 19060, "Ġcrowned": 19061, "Ġoccupants": 19062, "Ġtanker": 19063, "ĠVisa": 19064, "Great": 19065, "Ġseasoned": 19066, "ĠAviv": 19067, "Ġfiery": 19068, "Ġderivatives": 19069, "Ġdiverted": 19070, "Ġacqu": 19071, "Ġsandwiches": 19072, "ĠLorenzo": 19073, "Ġpardon": 19074, "ĠBarber": 19075, "ĠAgricultural": 19076, "ĠPhilly": 19077, "Ġregrets": 19078, "ĠMillions": 19079, "ĠFrazier": 19080, "Ġtreasury": 19081, "ĠKenn": 19082, "Ġdestined": 19083, "olved": 19084, "Back": 19085, "leader": 19086, "lyss": 19087, "ĠReyes": 19088, "001": 19089, "bags": 19090, "ĠStandards": 19091, "ĠExcellence": 19092, "ĠMaid": 19093, "ĠAnthem": 19094, "FIELD": 19095, "Ġrevived": 19096, "ĠQuad": 19097, "Ġdistinguished": 19098, "Ġweighted": 19099, "Ġritual": 19100, "Ġinvites": 19101, "wana": 19102, "iture": 19103, "ĠCI": 19104, "ĠMAY": 19105, "Ġunfairly": 19106, "ĠKP": 19107, "ĠMidlands": 19108, "Ġmint": 19109, "uers": 19110, "Ġcatalog": 19111, "arant": 19112, "Ġlosers": 19113, "Ġscheduling": 19114, "esar": 19115, "Ġtransferring": 19116, "Ġbankrupt": 19117, "Ġmethamphetamine": 19118, "ĠEsk": 19119, "ĠTreatment": 19120, "ĠResponse": 19121, "Ġhomework": 19122, "ĠBald": 19123, "Ġembarrassment": 19124, "Ġpoorest": 19125, "ĠPlatinum": 19126, "ĠFac": 19127, "Ġunleashed": 19128, "Ġbrighter": 19129, "002": 19130, "Ġdisl": 19131, "ĠLowry": 19132, "ived": 19133, "ĠDemon": 19134, "ĠNonetheless": 19135, "arro": 19136, "ĠCONT": 19137, "ifted": 19138, "ĠFreder": 19139, "isson": 19140, "Ġrout": 19141, "ARA": 19142, "Ġswinging": 19143, "Oct": 19144, "Ġliable": 19145, "Ġleaning": 19146, "Ġlungs": 19147, "380": 19148, "ĠProcess": 19149, "ĠCov": 19150, "terrorism": 19151, "Ġresistant": 19152, "Ġpumped": 19153, "Ġtripled": 19154, "Semitism": 19155, "ĠMia": 19156, "Ġpenetration": 19157, "ĠLutheran": 19158, "BU": 19159, "odes": 19160, "Ġspanning": 19161, "utch": 19162, "Trans": 19163, "ĠVolunteers": 19164, "Ġpathway": 19165, "Ġinfectious": 19166, "Ġdrastic": 19167, "ĠEngineers": 19168, "Ġprincess": 19169, "acts": 19170, "usting": 19171, "utive": 19172, "achel": 19173, "DO": 19174, "Ġpave": 19175, "ĠHerrera": 19176, "Ġnearing": 19177, "help": 19178, "Ġembarked": 19179, "Ġmodes": 19180, "ĠDriving": 19181, "Ġopting": 19182, "Best": 19183, "Ġbehavioral": 19184, "Ġcables": 19185, "App": 19186, "otion": 19187, "ĠExt": 19188, "ĠSinclair": 19189, "ĠInsp": 19190, "Ġsinking": 19191, "Next": 19192, "ĠLumpur": 19193, "ĠShadow": 19194, "Donald": 19195, "itals": 19196, "Ġmentions": 19197, "floor": 19198, "Ġconsiderations": 19199, "ĠSquad": 19200, "ĠPlate": 19201, "dos": 19202, "Friday": 19203, "Hopefully": 19204, "arre": 19205, "Ġalum": 19206, "\":\"/": 19207, "Ġfet": 19208, "anza": 19209, "Ġdign": 19210, "ĠNguyen": 19211, "ĠRutgers": 19212, "ĠSew": 19213, "Ġfilters": 19214, "ofi": 19215, "Ġunavailable": 19216, "ranking": 19217, "Ġrefining": 19218, "ĠUNC": 19219, "Ġmax": 19220, "yll": 19221, "Ġhandsome": 19222, "Ġutterly": 19223, "See": 19224, "ĠStores": 19225, "Ke": 19226, "ĠAdvoc": 19227, "ordon": 19228, "umbles": 19229, "Ġbugs": 19230, "olar": 19231, "ĠCork": 19232, "Ġtoken": 19233, "Ġauthorization": 19234, "Ġconscience": 19235, "Ġrepl": 19236, "edi": 19237, "owitz": 19238, "iven": 19239, "Ġlieu": 19240, "Ġlifts": 19241, "Lean": 19242, "Ġmagnificent": 19243, "ĠFilms": 19244, "onents": 19245, "Ġ***": 19246, "Green": 19247, "ĠAdvocate": 19248, "ĠArrow": 19249, "Ġblows": 19250, "Ġexploited": 19251, "fly": 19252, "ĠAmar": 19253, "ĠNOTICE": 19254, "Ġsincere": 19255, "found": 19256, "ĠRud": 19257, "Ġcy": 19258, "ĠHeidi": 19259, "Ġempowered": 19260, "Ġweakest": 19261, "ĠKru": 19262, "Credit": 19263, "aunted": 19264, "Ġexotic": 19265, "aning": 19266, "Ġaw": 19267, "ĠMulti": 19268, "Ġanimation": 19269, "850": 19270, "ĠCounter": 19271, "ĠNit": 19272, "alli": 19273, "Ġcapitalize": 19274, "Ġexecuting": 19275, "Ġdescent": 19276, "ovi": 19277, "ĠKimberly": 19278, "headed": 19279, "Ġmentioning": 19280, ")-": 19281, "ĠSpecifically": 19282, "ayette": 19283, "ihad": 19284, "ĠIss": 19285, "Ġdisagreed": 19286, "ĠKum": 19287, "Ġurges": 19288, "Ġpermitting": 19289, "Ġpy": 19290, "isp": 19291, "Ġhygiene": 19292, "Ġmourning": 19293, "Ġcyclists": 19294, "cats": 19295, "FER": 19296, "cycl": 19297, "Ġnewcomers": 19298, "Ġplead": 19299, "Ġmend": 19300, "secret": 19301, "fan": 19302, "Ġtranslates": 19303, "unit": 19304, "ĠTank": 19305, "drive": 19306, "ĠSite": 19307, "Ġacceleration": 19308, "ĠEnrique": 19309, "ĠElaine": 19310, "Ġstaring": 19311, "Ġbackwards": 19312, "Ġot": 19313, "Ġvot": 19314, "ĠHK": 19315, "Ġfian": 19316, "ĠLockheed": 19317, "Ġmanifest": 19318, "ĠZurich": 19319, "pad": 19320, "ĠRav": 19321, "flow": 19322, "Ġmoms": 19323, "ĠSolid": 19324, "ĠReady": 19325, "aughlin": 19326, "Ġreminding": 19327, "ĠCOR": 19328, "Ġoptimal": 19329, "ĠCrisis": 19330, "Ġcholesterol": 19331, "ĠGerard": 19332, "Ġfest": 19333, "Ġsanction": 19334, "Ġdragging": 19335, "inent": 19336, "ĠBravo": 19337, "Ġamend": 19338, "aval": 19339, "Ġpoem": 19340, "Ġinvasive": 19341, "Ġlandsc": 19342, "leigh": 19343, "Ġheadache": 19344, "ĠMuse": 19345, "ĠTurning": 19346, "girl": 19347, "cess": 19348, "Ġfalsely": 19349, "Ġplaintiff": 19350, "Ġheavier": 19351, "Ġrumored": 19352, "Ġeleven": 19353, "ĠConsumers": 19354, "ĠOriginally": 19355, "ĠStatement": 19356, "bors": 19357, "Ġrevoked": 19358, "ĠOmaha": 19359, "Fox": 19360, "ĠKle": 19361, "Ġvault": 19362, "Ġoutdated": 19363, "umes": 19364, "ĠArk": 19365, "Ġapologised": 19366, "Ġrockets": 19367, "ĠMarines": 19368, "Ġcaptures": 19369, "ĠMW": 19370, "ĠWalters": 19371, "ĠFactor": 19372, "Ġensuing": 19373, "ĠSession": 19374, "oons": 19375, "Ġ132": 19376, "gt": 19377, "ĠPoints": 19378, "Ġexhaust": 19379, "ĠOsaka": 19380, "heed": 19381, "Ġhandic": 19382, "amber": 19383, "inging": 19384, "Ġll": 19385, "Ġescorted": 19386, "Ġfloated": 19387, "Ġmerge": 19388, "Ġcompliment": 19389, "ĠVC": 19390, "Ġinsulin": 19391, "ĠDebt": 19392, "Ã§a": 19393, "Ġpens": 19394, "Ġassertion": 19395, "Ġredevelopment": 19396, "moderate": 19397, "Ġleftist": 19398, "ĠBA": 19399, "Ġherd": 19400, "Ġinsecurity": 19401, "liter": 19402, "Ġcommence": 19403, "ĠCaucus": 19404, "Ġnovels": 19405, "ĠChevron": 19406, "Ġerosion": 19407, "ĠNicholson": 19408, "ĠRoof": 19409, "ĠVolunteer": 19410, "Ġcompelled": 19411, "Ġcongratulated": 19412, "ĠPanel": 19413, "Ġov": 19414, "idelity": 19415, "Ġspect": 19416, "Ġbee": 19417, "ĠAssistance": 19418, "Ġterrified": 19419, "iew": 19420, "Ġweekday": 19421, "ĠHiggins": 19422, "special": 19423, "ubs": 19424, "anton": 19425, "Ġbribes": 19426, "Ġneat": 19427, "ĠCliff": 19428, "Ġdisqualified": 19429, "ĠND": 19430, "Ġvers": 19431, "andra": 19432, "Ġgraft": 19433, "value": 19434, "Ġportray": 19435, "Ġdaytime": 19436, "ksh": 19437, "Ġconsist": 19438, "Ġhonesty": 19439, "ĠTimber": 19440, "ĠNich": 19441, "Ġinvented": 19442, "ĠBuch": 19443, "Ġskull": 19444, "Ġtags": 19445, "Ġ124": 19446, "ighth": 19447, "Ġrelaxing": 19448, "Online": 19449, "Ġsanctioned": 19450, "Sport": 19451, "ĠCove": 19452, "Ġcomics": 19453, "MW": 19454, "AMA": 19455, "mother": 19456, "Home": 19457, "ĠCustomer": 19458, "Ġstrides": 19459, "ĠWins": 19460, "Ġrollout": 19461, "ĠWeaver": 19462, "Ġshuttle": 19463, "Ġsteak": 19464, "Ġglorious": 19465, "ĠToll": 19466, "Ġtrustee": 19467, "Ġinstallations": 19468, "ĠOpportunity": 19469, "Ġoper": 19470, "horse": 19471, "Ġaided": 19472, "irus": 19473, "Ġsleek": 19474, "Ġyelled": 19475, "ĠSocialist": 19476, "Ġapplaud": 19477, "ĠWah": 19478, "Ġdevote": 19479, "Ġdh": 19480, "Ġarchitectural": 19481, "ĠMAC": 19482, "centric": 19483, "ĠSense": 19484, "illas": 19485, "ĠArchbishop": 19486, "glass": 19487, "Ġallowance": 19488, "Ġbundle": 19489, "andon": 19490, "eight": 19491, "ĠKare": 19492, "haus": 19493, "ĠAndreas": 19494, "Ġdoll": 19495, "RAM": 19496, "Ġvolunteering": 19497, "ĠRaleigh": 19498, "Ġbees": 19499, "Ġnickel": 19500, "Ġgenerosity": 19501, "Ġhomeowner": 19502, "ĠLieutenant": 19503, "Ġlandfall": 19504, "ĠRenew": 19505, "ĠGiving": 19506, "ĠContribut": 19507, "aret": 19508, "ulf": 19509, "Ġreinforce": 19510, "ĠSalv": 19511, "ĠVenice": 19512, "Ġfreedoms": 19513, "ĠTools": 19514, "Ġ1962": 19515, "ĠWarm": 19516, "majority": 19517, "Ġpleas": 19518, "oding": 19519, "plant": 19520, "Ġtow": 19521, "ĠBlanc": 19522, "ĠPipeline": 19523, "ĠMoor": 19524, "Ġrefrain": 19525, "ĠExplore": 19526, "language": 19527, "cers": 19528, "ĠWT": 19529, "sent": 19530, "ĠNun": 19531, "Ġplastics": 19532, "acas": 19533, "Ġdisruptions": 19534, "Ġdiscomfort": 19535, "enko": 19536, "Ġimprisoned": 19537, "Copyright": 19538, "Ġmyriad": 19539, "Ġparenting": 19540, "Ġspree": 19541, "NBC": 19542, "Ġonion": 19543, "ĠIsraelis": 19544, "ĠRA": 19545, "Ġrelocate": 19546, "113": 19547, "ĠHir": 19548, "ĠDre": 19549, "ĠDry": 19550, "ĠONE": 19551, "ĠAdministrator": 19552, "Ġprints": 19553, "ĠGret": 19554, "Ġundergraduate": 19555, "ĠLif": 19556, "avers": 19557, "ĠCarney": 19558, "Ġapex": 19559, "Ġlenses": 19560, "Ġliberals": 19561, "gb": 19562, "ĠWhereas": 19563, "Ġcountryside": 19564, "amine": 19565, "ĠTerminal": 19566, "Ġintr": 19567, "ĠTrey": 19568, "ALS": 19569, "Ġcontinental": 19570, "Ġselfies": 19571, "FILE": 19572, "ĠUnity": 19573, "Ġauthoritarian": 19574, "Ġoriginated": 19575, "ĠExcept": 19576, "yna": 19577, "Ġmonet": 19578, "Ġundermining": 19579, "ĠGS": 19580, "pi": 19581, "iq": 19582, "Ġslides": 19583, "ĠSummary": 19584, "Ġpains": 19585, "cluding": 19586, "Ġequation": 19587, "locked": 19588, "Ġfraternity": 19589, "Ġwithstand": 19590, "Ġdevastation": 19591, "Ġdemo": 19592, "late": 19593, "Ġpunches": 19594, "Ġgeared": 19595, "nen": 19596, "ĠBowie": 19597, "attle": 19598, "Ġpolitic": 19599, "ĠGle": 19600, "mented": 19601, "ĠCoordinator": 19602, "Ġupwards": 19603, "ĠMega": 19604, "angled": 19605, "Ġengineered": 19606, "Ġluggage": 19607, "ĠWen": 19608, "ĠSergeant": 19609, "Ġkindergarten": 19610, "ĠPortsmouth": 19611, "uddin": 19612, "ket": 19613, "oba": 19614, "Ġoscill": 19615, "esse": 19616, "ĠOlson": 19617, "ĠBorough": 19618, "Ġsupplements": 19619, "ĠEvening": 19620, "ANE": 19621, "Ġlava": 19622, "Ġgearing": 19623, "setting": 19624, "urgical": 19625, "asty": 19626, "ĠDaytona": 19627, "Ġbrewery": 19628, "Ġpledges": 19629, "rounder": 19630, "ulous": 19631, "ĠHancock": 19632, "rex": 19633, "Ġram": 19634, "Ġproceeding": 19635, "ĠMurdoch": 19636, "Ġdowngrade": 19637, "Ġstatues": 19638, "Ġdebated": 19639, "ĠSleep": 19640, "Ġ144": 19641, "ĠRuby": 19642, "ĠFi": 19643, "123": 19644, "ĠArabic": 19645, "Ġlasts": 19646, "ĠIvy": 19647, "ĠWid": 19648, "rown": 19649, "stick": 19650, "?'\"": 19651, "ĠSTEM": 19652, "Ġsensible": 19653, "htar": 19654, "Ġharbor": 19655, "Ġcra": 19656, "ĠAlbum": 19657, "ĠCarnival": 19658, "Ġimplies": 19659, "agement": 19660, "ĠInitially": 19661, "Ġchooses": 19662, "Jeff": 19663, "ĠHig": 19664, "Ġtam": 19665, "Ġlump": 19666, "ucks": 19667, "Ġrepatri": 19668, "ĠMercy": 19669, "zza": 19670, "Ġ365": 19671, "ĠRicardo": 19672, "ogram": 19673, "Ġundergone": 19674, "system": 19675, "Ġtel": 19676, "ĠKee": 19677, "ully": 19678, "istas": 19679, "Ġgrains": 19680, "ĠTomorrow": 19681, "ĠRC": 19682, "ĠTurk": 19683, "Ġfreshmen": 19684, "ĠAway": 19685, "ĠSach": 19686, "ĠUltimate": 19687, "Ġoffensively": 19688, "ismo": 19689, "Ġteaser": 19690, "ĠJud": 19691, "Ġlegitimacy": 19692, "opt": 19693, "ĠCobb": 19694, "Ġrejecting": 19695, "ĠSolo": 19696, "ĠArcher": 19697, "Ġsoutheastern": 19698, "ĠPlain": 19699, "ĠLoss": 19700, "Ġminerals": 19701, "ĠMari": 19702, "Ġscrambling": 19703, "ĠPeak": 19704, "Ġhavoc": 19705, "rings": 19706, "Ġunofficial": 19707, "ĠHaj": 19708, "director": 19709, "ĠCanal": 19710, "ĠNSA": 19711, "ĠEaton": 19712, "ĠPART": 19713, "ĠCommissioners": 19714, "Ġwellbeing": 19715, "resa": 19716, "Ġunderstandable": 19717, "dates": 19718, "ĠSorry": 19719, "Ġastonishing": 19720, "Ġrevise": 19721, "ĠEc": 19722, "ĠLack": 19723, "endi": 19724, "endale": 19725, "also": 19726, "Ġcolder": 19727, "Ġheel": 19728, "Ġcellular": 19729, "Conn": 19730, "ĠThur": 19731, "Ġmassage": 19732, "olla": 19733, "clus": 19734, "Ġtoilets": 19735, "ĠCelebr": 19736, "Ġtackled": 19737, "Ġchorus": 19738, "ETA": 19739, "anca": 19740, "ĠOLED": 19741, "Ġpunk": 19742, "ĠBrain": 19743, "ĠNuggets": 19744, "Ġseamless": 19745, "make": 19746, "atted": 19747, "ĠRog": 19748, "ĠPatch": 19749, "Ġruined": 19750, "Ins": 19751, "Ġconsolidate": 19752, "Ġgospel": 19753, "ĠCaption": 19754, "Ġoverweight": 19755, "Ġscreened": 19756, "ĠKraft": 19757, "ĠBain": 19758, "breaker": 19759, "ĠFeinstein": 19760, "ĠDoc": 19761, "Ġdeepest": 19762, "ĠOL": 19763, "Ġtunes": 19764, "Ġrightly": 19765, "ĠLanc": 19766, "ĠBrotherhood": 19767, "Ġpoultry": 19768, "ĠPure": 19769, "Ġstimulate": 19770, "Ġdiscourse": 19771, "ĠStark": 19772, "Ġmuseums": 19773, "ention": 19774, "Ġtaxation": 19775, "ĠAkron": 19776, "ayer": 19777, "ĠKirby": 19778, "farm": 19779, "oser": 19780, "Ġcommend": 19781, "Ġunarmed": 19782, "ensions": 19783, "Ġsuperst": 19784, "Ġoceans": 19785, "Ġmisuse": 19786, "LO": 19787, "ĠByrne": 19788, "ĠMaritime": 19789, "Ġdense": 19790, "Ġexcuses": 19791, "Ġsuppose": 19792, "ĠMarks": 19793, "Ġrainy": 19794, "Ġreplicate": 19795, "Ġboutique": 19796, "ĠRenaissance": 19797, "jas": 19798, "icted": 19799, "Ġreferenced": 19800, "ĠTir": 19801, "ĠHatch": 19802, "ĠCry": 19803, "ĠPayPal": 19804, "Ġfulfil": 19805, "ĠHawaiian": 19806, "come": 19807, "ĠThirty": 19808, "Ġ260": 19809, "ĠYak": 19810, "Ġangles": 19811, "Ġlandlord": 19812, "Ġlavish": 19813, "Women": 19814, "ĠNT": 19815, "Ġreinforced": 19816, "Ġprevail": 19817, "ĠCommunities": 19818, "Ġfootwear": 19819, "Ġassurances": 19820, "Ġlb": 19821, "Ġairing": 19822, "Ġresorts": 19823, "ĠFiji": 19824, "ĠShay": 19825, "Ġprevailing": 19826, "many": 19827, "Ġimpe": 19828, "ĠDul": 19829, "Ġsymbols": 19830, "zb": 19831, "ĠCere": 19832, "Ġapplauded": 19833, "Ġsoundtrack": 19834, "Ġdrunken": 19835, "ĠEuropeans": 19836, "Ġherds": 19837, "moving": 19838, "WR": 19839, "ĠHindi": 19840, "Ġwaking": 19841, "Jo": 19842, "Andrew": 19843, "rosse": 19844, "ĠLegislative": 19845, "Ġdisgrace": 19846, "Nothing": 19847, "ĠBulgaria": 19848, "Ġhumidity": 19849, "Ġtranslation": 19850, "Ġmeasurements": 19851, "Ġvying": 19852, "ĠBrid": 19853, "Max": 19854, "Ġdir": 19855, "unci": 19856, "Ġdefines": 19857, "Ġperfection": 19858, "ancers": 19859, "Matt": 19860, "ĠShinzo": 19861, "ĠPresidents": 19862, "Ġginger": 19863, "onna": 19864, "existing": 19865, "rika": 19866, "enced": 19867, "ĠBray": 19868, "Ġgall": 19869, "Ġdisrespect": 19870, "ĠCumber": 19871, "Ġcontestant": 19872, "ucky": 19873, "anticipated": 19874, "abled": 19875, "LLOW": 19876, "Bel": 19877, "ĠKear": 19878, "Ġstoryline": 19879, "Ġrigs": 19880, "ĠScots": 19881, "ĠChap": 19882, "ĠThankfully": 19883, "Ġcommunist": 19884, "ĠAdviser": 19885, "Ġregist": 19886, "Ġannoying": 19887, "ĠDVD": 19888, "Ġethic": 19889, "ĠFilipino": 19890, "ĠAdidas": 19891, "Ġbilling": 19892, "Ġalleviate": 19893, "Ġsmoked": 19894, "Ġhazard": 19895, "EV": 19896, "Ag": 19897, "baum": 19898, "Ġdoses": 19899, "Ġoutcry": 19900, "Ġinclined": 19901, "Ġpsychologist": 19902, "itzer": 19903, "January": 19904, "Ġmornings": 19905, "aught": 19906, "Ġsurreal": 19907, "ĠCannon": 19908, "avy": 19909, "ĠCris": 19910, "cf": 19911, "Ġinterpreted": 19912, "Ġpersecution": 19913, "vation": 19914, "Ġupfront": 19915, "ĠWaste": 19916, "Ġmills": 19917, "Ġbombings": 19918, "ĠHeaven": 19919, "ĠFlat": 19920, "Ġboxer": 19921, "Ġavenues": 19922, "Invest": 19923, "ĠZika": 19924, "Ġbackstage": 19925, "idas": 19926, "eston": 19927, "ead": 19928, "Ġbishops": 19929, "Ġrender": 19930, "Ġfootballer": 19931, "Ġspilled": 19932, "Only": 19933, "Ġsaddened": 19934, "ĠAbove": 19935, "inator": 19936, "tro": 19937, "onen": 19938, "ĠAMC": 19939, "Ġstringent": 19940, "Ġfooting": 19941, "ĠGhost": 19942, "Ġtexting": 19943, "ĠCPI": 19944, "ĠUW": 19945, "Ġaccol": 19946, "iries": 19947, "ĠFlex": 19948, "ĠCarolyn": 19949, "Andre": 19950, "Ġsiege": 19951, "Muslim": 19952, "Ġautomobile": 19953, "reci": 19954, "Ġdean": 19955, "atre": 19956, "Ġwax": 19957, "Ġwo": 19958, "ĠDuffy": 19959, "Ġfiance": 19960, "Ġfib": 19961, "Ġeagle": 19962, "ĠCatal": 19963, "Ġinfants": 19964, "Ġsubmitting": 19965, "Ġdownhill": 19966, "Ġstaffer": 19967, "ĠLights": 19968, "Ġeater": 19969, "ĠCaliforn": 19970, "Ġsupervisors": 19971, "ĠPy": 19972, "Ġcondemnation": 19973, "Ġsci": 19974, "Ġhated": 19975, "Ġtil": 19976, "ĠLavrov": 19977, "Ġsab": 19978, "Ġmotors": 19979, "Ġlogging": 19980, "ĠOwn": 19981, "Ġpi": 19982, "Ġrepeating": 19983, "ĠDOJ": 19984, "enary": 19985, "ĠChow": 19986, "fat": 19987, "Ġbalcony": 19988, "orie": 19989, "NING": 19990, "ĠUnified": 19991, "Neil": 19992, "Bill": 19993, "ĠSims": 19994, "uten": 19995, "LV": 19996, "ĠEMS": 19997, "Ġsip": 19998, "Ġreplaces": 19999, "ichi": 20000, "ĠFig": 20001, "ĠCharity": 20002, "Ġpeek": 20003, "Ġrack": 20004, "Ġcousins": 20005, "Ġresolving": 20006, "Ġthrone": 20007, "ĠEngine": 20008, "ĠChak": 20009, "Ġlamented": 20010, "Ġwipe": 20011, "Ġnutrients": 20012, "ĠChat": 20013, "AMP": 20014, "ĠOprah": 20015, "uming": 20016, "serving": 20017, "Ġfir": 20018, "Ġlandlords": 20019, "neck": 20020, "Ġupload": 20021, "Ġunspecified": 20022, "Ġicy": 20023, "´": 20024, "Ġze": 20025, "Ġprohibits": 20026, "ĠFI": 20027, "Res": 20028, "ĠEff": 20029, "hell": 20030, "umbo": 20031, "Ġreceipts": 20032, "Ġoperatives": 20033, "stant": 20034, "Ġwives": 20035, "ĠCinema": 20036, "Ġnegligence": 20037, "Ġgases": 20038, "ĠLau": 20039, "Ġbrew": 20040, "August": 20041, "never": 20042, "Ġpenned": 20043, "Ġincomplete": 20044, "ĠZh": 20045, "esi": 20046, "Ġranged": 20047, "apolis": 20048, "Ġwithdrawing": 20049, "ĠLevi": 20050, "ĠLevy": 20051, "ĠDaly": 20052, "Ġdelaying": 20053, "ĠMSNBC": 20054, "ĠCyrus": 20055, "ĠNutrition": 20056, "NN": 20057, "Ġwinding": 20058, "Ġglow": 20059, "ĠMY": 20060, "Ġgoodwill": 20061, "ĠMON": 20062, "Ġslots": 20063, "ĠNina": 20064, "ĠFIR": 20065, "ĠLTE": 20066, "ĠInnov": 20067, "dev": 20068, "ctic": 20069, "Ġanalyses": 20070, "ĠBangalore": 20071, "Ġtales": 20072, "Ġovercame": 20073, "ĠThurs": 20074, "Ġcherry": 20075, "ĠNou": 20076, "ĠFlowers": 20077, "1000": 20078, "updated": 20079, "rieve": 20080, "ĠBeautiful": 20081, "iak": 20082, "Ġplayback": 20083, "Ġheadset": 20084, "Ġashamed": 20085, "Min": 20086, "Ġadm": 20087, "ĠLucky": 20088, "ĠTucson": 20089, "Ġentirety": 20090, "ranging": 20091, "ĠVance": 20092, "kered": 20093, "image": 20094, "ĠGord": 20095, "War": 20096, "Ġsimilarities": 20097, "dig": 20098, "ĠJude": 20099, "Ġlonely": 20100, "hra": 20101, "ĠStaples": 20102, "ĠACA": 20103, "Ġmeasurement": 20104, "Ġcooper": 20105, "ATER": 20106, "ĠMeng": 20107, "Ġbarring": 20108, "190": 20109, "ĠBatt": 20110, "Ġreproductive": 20111, "ĠRowe": 20112, "Ġsubsid": 20113, "Ġslogans": 20114, "ugar": 20115, "ĠKeller": 20116, "ingham": 20117, "fuel": 20118, "Ġhid": 20119, "afe": 20120, "Ġindul": 20121, "cash": 20122, "Ġstressing": 20123, "ĠMIT": 20124, "Ġtrump": 20125, "ancer": 20126, "ĠPes": 20127, "ĠMint": 20128, "Ġcrossover": 20129, "ĠWeiss": 20130, "ĠElvis": 20131, "ĠPermanent": 20132, "ĠKhalid": 20133, "Ġunjust": 20134, "Ġexceptionally": 20135, "Ġfut": 20136, "Ġavid": 20137, "ĠEthics": 20138, "Ġutilized": 20139, "Ġfeasibility": 20140, "Ġcatering": 20141, "Press": 20142, "wayne": 20143, "October": 20144, "Ġfavors": 20145, "Ġobsession": 20146, "Ġmelt": 20147, "Ġmug": 20148, "ĠMK": 20149, "Ġapples": 20150, "Ġvine": 20151, "cliffe": 20152, "Ġgrat": 20153, "Ġspells": 20154, "ounced": 20155, "Ġdecree": 20156, "issy": 20157, "Team": 20158, "Ġdeploying": 20159, "Feb": 20160, "Ġmiserable": 20161, "Ġwat": 20162, "ĠBust": 20163, "ĠNorris": 20164, "ĠTimberwolves": 20165, "Ġangered": 20166, "ĠArn": 20167, "oft": 20168, "rome": 20169, "Ġadvertisements": 20170, "onal": 20171, "Ġnun": 20172, "Ġtorque": 20173, "Ġslave": 20174, "Ġnonsense": 20175, "Ġcoy": 20176, "Ġcites": 20177, "Game": 20178, "Ġarchitects": 20179, "playing": 20180, "Ġgener": 20181, "Ġsocio": 20182, "Ġmeditation": 20183, "Ġforgive": 20184, "Ġsmiled": 20185, "%),": 20186, "Ġpers": 20187, "ĠSoph": 20188, "Ġoccupy": 20189, "atton": 20190, "Ġwitnessing": 20191, "Ġapologise": 20192, "Ġpredecessors": 20193, "ĠCassidy": 20194, "Ġtallied": 20195, "NER": 20196, "Ġtract": 20197, "ĠHolder": 20198, "ĠPav": 20199, "Ġjackets": 20200, "Mel": 20201, "raud": 20202, "Ġexercising": 20203, "ĠChung": 20204, "ĠAmin": 20205, "athi": 20206, "ĠMem": 20207, "Ġracked": 20208, "Ġcarved": 20209, "ĠMickey": 20210, "ĠLafayette": 20211, "Ġgrill": 20212, "ĠINFORMATION": 20213, "usc": 20214, "ĠPromotion": 20215, "yson": 20216, "istry": 20217, "Ġfulfilled": 20218, "Ġrestraint": 20219, "Ġpopping": 20220, "ĠSlater": 20221, "Ġmercy": 20222, "aden": 20223, "Ġsubmarine": 20224, "ĠBowling": 20225, "dogs": 20226, "ĠSwe": 20227, "Ġnoticeable": 20228, "Ġbis": 20229, "ĠPremiership": 20230, "Ġspat": 20231, "ĠTow": 20232, "ĠWand": 20233, "Ġmechanics": 20234, "while": 20235, "ĠBenson": 20236, "Ġmolecules": 20237, "Ġcrosses": 20238, "Ġrecalling": 20239, "ĠCertainly": 20240, "HAM": 20241, "Ġsever": 20242, "ĠRudy": 20243, "ĠDUI": 20244, "OLD": 20245, "ĠTobacco": 20246, "Ġsubdued": 20247, "Ġquota": 20248, "TF": 20249, "Ġflats": 20250, "Ġemphasize": 20251, "Ġbelts": 20252, "ĠOpinion": 20253, "Ġpiled": 20254, "ĠSpark": 20255, "ĠElias": 20256, "Ġclassification": 20257, "ĠHands": 20258, "ĠCV": 20259, "Ġtoast": 20260, "Ġcandle": 20261, "atching": 20262, "short": 20263, "ĠDup": 20264, "Ġult": 20265, "bats": 20266, "Ġmarketers": 20267, "ĠAvery": 20268, "ĠColbert": 20269, "ĠIk": 20270, "ĠVac": 20271, "ĠJackets": 20272, "Ġmerits": 20273, "eli": 20274, "PORT": 20275, "Ġelevator": 20276, "irming": 20277, "effective": 20278, "Ġgroceries": 20279, "Ġhi": 20280, "ĠINTER": 20281, "ĠSAP": 20282, "ĠNYPD": 20283, "ĠKY": 20284, "Ġangel": 20285, "Ġspectacle": 20286, "rÃ©": 20287, "ĠRoche": 20288, "Ġinsects": 20289, "Ġcommenced": 20290, "ĠFoley": 20291, "Ġdarker": 20292, "ĠUg": 20293, "ĠMostly": 20294, "Ġtermed": 20295, "uci": 20296, "ĠExec": 20297, "ĠBrittany": 20298, "Ġharmony": 20299, "Ġadvocated": 20300, "Ġparcel": 20301, "ĠHots": 20302, "Ġmonarch": 20303, "ĠSiri": 20304, "odge": 20305, "ĠPag": 20306, "Ġprogressing": 20307, "grounds": 20308, "Ġonstage": 20309, "Ġwarmth": 20310, "ĠWon": 20311, "Ġviolates": 20312, "ĠSaudis": 20313, "Ġbumper": 20314, "Ġpatrols": 20315, "ĠBarron": 20316, "Ġindoors": 20317, "Ġtar": 20318, "Each": 20319, "Val": 20320, "Ġapplicant": 20321, "ĠCater": 20322, "Ġclassics": 20323, "ĠThreat": 20324, "Ġwrapping": 20325, "ĠIdlib": 20326, "anking": 20327, "Did": 20328, "adia": 20329, "ĠRig": 20330, "ĠBram": 20331, "ĠLaurie": 20332, "ĠHair": 20333, "ĠCannabis": 20334, "Ġdaylight": 20335, "ĠNorm": 20336, "ĠRip": 20337, "sin": 20338, "unta": 20339, "Pass": 20340, "ĠAcad": 20341, "ĠCummings": 20342, "Ġtheirs": 20343, "ĠDistribution": 20344, "especially": 20345, "Ġgrilled": 20346, "Ġaffiliates": 20347, "ĠVander": 20348, "ĠCath": 20349, "ĠProductions": 20350, "ĠTrek": 20351, "230": 20352, "Ġcasinos": 20353, "ĠCain": 20354, "atu": 20355, "idget": 20356, "ĠWinds": 20357, "Ġunanswered": 20358, "Ġintercept": 20359, "ĠMarty": 20360, "Ġrefin": 20361, "Ġlieutenant": 20362, "cas": 20363, "Chief": 20364, "average": 20365, "ilot": 20366, "Ġscrimmage": 20367, "ĠMud": 20368, "speaking": 20369, "ĠFranken": 20370, "ĠTories": 20371, "Ġabstract": 20372, "awar": 20373, "ĠTerms": 20374, "dal": 20375, "ĠFur": 20376, "Ġhumour": 20377, "rh": 20378, "Ġsitu": 20379, "aed": 20380, "ĠFIN": 20381, "Ġtranscripts": 20382, "approved": 20383, "ĠParsons": 20384, "Ġpigs": 20385, "Ġrepayment": 20386, "ĠARM": 20387, "ĠElliot": 20388, "ĠLevine": 20389, "Ġtagged": 20390, "pun": 20391, "ĠDwight": 20392, "Ġconfiguration": 20393, "sis": 20394, "ĠAdult": 20395, "Ġearthquakes": 20396, "Ġcreature": 20397, "ĠMRI": 20398, "Ġmach": 20399, "Ġprescriptions": 20400, "cover": 20401, "Ġministries": 20402, "Ġinaccurate": 20403, "ĠLabs": 20404, "ĠMGM": 20405, "Ġtomato": 20406, "Ġeng": 20407, "Ġopposes": 20408, "owan": 20409, "Ġmapping": 20410, "Ġconsum": 20411, "online": 20412, "eters": 20413, "code": 20414, "Aug": 20415, "Point": 20416, "branded": 20417, "pling": 20418, "ĠCalder": 20419, "Oper": 20420, "ĠMiddles": 20421, "Ġchampagne": 20422, "ĠTues": 20423, "Ġsampling": 20424, "Ġenergetic": 20425, "rano": 20426, "ĠStyles": 20427, "Ġneglected": 20428, "ĠDamon": 20429, "Ġendanger": 20430, "Ġsouthwestern": 20431, "ĠATM": 20432, "ĠDuck": 20433, "engers": 20434, "Ġdan": 20435, "yth": 20436, "Ġbou": 20437, "ĠDecl": 20438, "Gold": 20439, "Ġprojecting": 20440, "Google": 20441, "ĠHussein": 20442, "Ġaccomplishment": 20443, "itarian": 20444, "Ġgossip": 20445, "ĠRai": 20446, "ril": 20447, "ĠSke": 20448, "Ġpsychiatric": 20449, "ĠMacBook": 20450, "ĠAdobe": 20451, "ĠHodg": 20452, "Ġaccompany": 20453, "Ġadvertised": 20454, "Ġreminiscent": 20455, "Ġgeographical": 20456, "Ġconvertible": 20457, "IK": 20458, "CTV": 20459, "Ġcommunal": 20460, "Ġchim": 20461, "Ġselfish": 20462, "Ġdrilled": 20463, "Ġtortured": 20464, "Ġblacks": 20465, "noon": 20466, "Ġmanifesto": 20467, "ĠRichie": 20468, "acco": 20469, "Im": 20470, "Ġdebit": 20471, "ĠSNP": 20472, "perfect": 20473, "gard": 20474, "ĠRatio": 20475, "Ġstubborn": 20476, "Ġaccumulation": 20477, "Ġcongregation": 20478, "Ġkissing": 20479, "Ġkillers": 20480, "ĠAbbey": 20481, "von": 20482, "ĠFuj": 20483, "ĠIsabel": 20484, "NB": 20485, "ĠNish": 20486, "ĠJulius": 20487, "ĠZimmer": 20488, "Ġuncover": 20489, "dar": 20490, "isle": 20491, "ĠCompar": 20492, "Ġcounselor": 20493, "ĠSok": 20494, "ĠCumm": 20495, "ĠHip": 20496, "Ġurgently": 20497, "Ġrentals": 20498, "Ġapproving": 20499, "Ġirrigation": 20500, "Ġprostate": 20501, "ĠJudicial": 20502, "ĠSubmit": 20503, "ĠTanner": 20504, "attack": 20505, "emb": 20506, "Ġreclaim": 20507, "Ġec": 20508, "Ġbrutality": 20509, "Ġcommanding": 20510, "Ġreasoning": 20511, "Roy": 20512, "ĠElect": 20513, "ĠMobil": 20514, "anding": 20515, "Ġmirrors": 20516, "Israel": 20517, "Ġpavement": 20518, "Ġoverdue": 20519, "ĠMd": 20520, "street": 20521, "Ġthrill": 20522, "pora": 20523, "azon": 20524, "Ġbrewing": 20525, "enge": 20526, "ĠDisaster": 20527, "Ġbuilder": 20528, "ods": 20529, "utsch": 20530, "Ġterminals": 20531, "ĠBaird": 20532, "enburg": 20533, "Ġhast": 20534, "Ġbrass": 20535, "Ġparental": 20536, "enture": 20537, "ĠConduct": 20538, "Ġexpands": 20539, "luck": 20540, "mur": 20541, "ĠBj": 20542, "Ġadministrations": 20543, "ĠOlivier": 20544, "oux": 20545, "Ġnarrowed": 20546, "winner": 20547, "Ġmakeshift": 20548, "ĠVAT": 20549, "ĠJavier": 20550, "-,": 20551, "Ġsystematic": 20552, "Ġenforcing": 20553, "emin": 20554, "ĠAudio": 20555, "United": 20556, "gener": 20557, "ĠKara": 20558, "ivas": 20559, "ĠPretty": 20560, "ĠLob": 20561, "Ġpetitions": 20562, "ĠMercer": 20563, "ampa": 20564, "product": 20565, "Ġdistributing": 20566, "Ġtunnels": 20567, "Ġcondo": 20568, "ĠRSS": 20569, "ĠCarlo": 20570, "Ġpumpkin": 20571, "Ġsto": 20572, "Ġassumes": 20573, "oway": 20574, "hiba": 20575, "lection": 20576, "Ġgam": 20577, "ĠAires": 20578, "Ġtransmitted": 20579, "Ġtrousers": 20580, "Ġcheers": 20581, "ĠJensen": 20582, "Ġemer": 20583, "Ġsimpler": 20584, "Ġcolored": 20585, "ĠSustainable": 20586, "Ġinstruct": 20587, "Ġpoles": 20588, "Ġsupervised": 20589, "Ġinteg": 20590, "ĠMoreno": 20591, "boarding": 20592, "igrant": 20593, "ĠYoga": 20594, "Ġenvironmentally": 20595, "Ġsacrifices": 20596, "Ġshores": 20597, "Ġ127": 20598, "Ġestranged": 20599, "Ġintoxicated": 20600, "Ġemergencies": 20601, "ĠKosovo": 20602, "yang": 20603, "Ġfastball": 20604, "Ġpackaged": 20605, "LAN": 20606, "Ġhurry": 20607, "ĠManny": 20608, "Ġporch": 20609, "Ġcuriosity": 20610, "ĠKend": 20611, "thouse": 20612, "ĠTou": 20613, "mun": 20614, "Ġwaving": 20615, "Ġpasswords": 20616, "ĠSwan": 20617, "Ġprefers": 20618, "ĠCorrections": 20619, "aic": 20620, "Ġejected": 20621, "Ġdossier": 20622, "ĠChal": 20623, "Ġfacto": 20624, "Ġspine": 20625, "leck": 20626, "Ġrestriction": 20627, "Ġdisagreement": 20628, "grown": 20629, "ĠEdgar": 20630, "Ġquantities": 20631, "ĠRapid": 20632, "Ġpals": 20633, "Ġspared": 20634, "Ġremarkably": 20635, "ructure": 20636, "Ġbackers": 20637, "ĠGoals": 20638, "cles": 20639, "rolling": 20640, "ĠBlasio": 20641, "Ġorchestra": 20642, "ologies": 20643, "ĠRise": 20644, "Power": 20645, "Ġuptick": 20646, "atha": 20647, "ĠMob": 20648, "Ġshotgun": 20649, "downs": 20650, "ĠBorg": 20651, "Ġmorale": 20652, "Call": 20653, "wave": 20654, "ĠDuc": 20655, "Ġunwilling": 20656, "oad": 20657, "Ġbusinessmen": 20658, "Ġrefriger": 20659, "Ġgamers": 20660, "Ġcele": 20661, "Ġprecip": 20662, "Ġrenegoti": 20663, "OY": 20664, "ĠPharm": 20665, "Ġresponsive": 20666, "Ġservant": 20667, "eye": 20668, "Ġraping": 20669, "vas": 20670, "Ġgroin": 20671, "ĠMelvin": 20672, "ĠKurds": 20673, "Ġstricter": 20674, "ĠMum": 20675, "ients": 20676, "Ġstandalone": 20677, "Ġforums": 20678, "Ġcommemorate": 20679, "Far": 20680, "ĠTelegram": 20681, "Ġscreenings": 20682, "ĠLeonardo": 20683, "ighton": 20684, "ĠDOWN": 20685, "Ġmodule": 20686, "Ġremedy": 20687, "Ġ280": 20688, "Su": 20689, "ĠBecker": 20690, "ĠGast": 20691, "prem": 20692, "ĠInto": 20693, "oyle": 20694, "114": 20695, "Ġadhere": 20696, "Report": 20697, "ĠJaneiro": 20698, "ĠKry": 20699, "Pakistan": 20700, "Ġrobotic": 20701, "ande": 20702, "Ġoverlooking": 20703, "ĠTreaty": 20704, "Ġrect": 20705, "yne": 20706, "Ġbattlefield": 20707, "ĠGeoff": 20708, "Ġearns": 20709, "ĠMiner": 20710, "Ġteased": 20711, "Ġexemptions": 20712, "Ġvacancy": 20713, "oku": 20714, "Ġvulnerabilities": 20715, "ĠRou": 20716, "Ġobserv": 20717, "Ġoverlook": 20718, "Ġcorrespond": 20719, "Ġtheatrical": 20720, "Ġrobotics": 20721, "ĠCompl": 20722, "ĠPasadena": 20723, "laden": 20724, "Ġvastly": 20725, "olit": 20726, "Ġjustification": 20727, "Ġtampering": 20728, "ĠSutherland": 20729, "ĠMens": 20730, "Ġinvisible": 20731, "uren": 20732, "ĠAshton": 20733, "owl": 20734, "Ġdisqual": 20735, "ĠEva": 20736, "Ġfriction": 20737, "ĠIrvine": 20738, "Ġaliens": 20739, "ĠPension": 20740, "ĠAssets": 20741, "ĠBenedict": 20742, "ittal": 20743, "Ġsword": 20744, "Ġunderwear": 20745, "ĠFarmer": 20746, "Ġtimber": 20747, "Ġdependence": 20748, "ĠTang": 20749, "Ġ165": 20750, "ĠNazis": 20751, "Ġpunching": 20752, "ĠGloria": 20753, "usat": 20754, "Ġluxurious": 20755, "chuk": 20756, "ĠCot": 20757, "Ġregained": 20758, "Ġreassure": 20759, "Ġhello": 20760, "Ġante": 20761, "Ġnegotiators": 20762, "Add": 20763, "paced": 20764, "Ã©r": 20765, "Ġdemolished": 20766, "Ann": 20767, "joy": 20768, "ĠJenna": 20769, "Apple": 20770, "Ġdisturbance": 20771, "Ġcommissions": 20772, "ĠPolitico": 20773, "along": 20774, "Ġnem": 20775, "Ġauctions": 20776, "ruck": 20777, "ĠOD": 20778, "ofer": 20779, "Play": 20780, "Ġcarn": 20781, "vez": 20782, "Ġtents": 20783, "Ġcongratulate": 20784, "ĠLiquid": 20785, "ĠCoyotes": 20786, "uku": 20787, "ĠAllah": 20788, "Ġbend": 20789, "Ġcanvas": 20790, "ĠClifford": 20791, "Ġvolunteered": 20792, "Luc": 20793, "bp": 20794, "ĠCensus": 20795, "ĠShot": 20796, "Ġanonymously": 20797, "ĠAnglo": 20798, "ĠBayer": 20799, "ĠAber": 20800, "ĠCorrectional": 20801, "Ġhardship": 20802, "ĠBuenos": 20803, "ĠDaw": 20804, "Ġbaskets": 20805, "Ġupstairs": 20806, "Ġmindful": 20807, "ĠLCD": 20808, "ĠBlackburn": 20809, "ĠHale": 20810, "477": 20811, "Ġcircus": 20812, "ĠDragons": 20813, "Ġrubble": 20814, "rb": 20815, "Ġheadaches": 20816, "aunt": 20817, "itus": 20818, "Ġscaled": 20819, "ĠComic": 20820, "asio": 20821, "ĠNordic": 20822, "Per": 20823, "Ġbombers": 20824, "ilitation": 20825, "Ġindirectly": 20826, "ĠHod": 20827, "andan": 20828, "operation": 20829, "Ġpuppy": 20830, "ĠMats": 20831, "Ġstewards": 20832, "roup": 20833, "Ġmemorandum": 20834, "Ġpatio": 20835, "const": 20836, "ĠBold": 20837, "ĠKaiser": 20838, "Following": 20839, "Ġcompat": 20840, "Ġsidewalks": 20841, "ĠFitzpatrick": 20842, "Ġsunlight": 20843, "ĠLever": 20844, "ĠBecky": 20845, "icles": 20846, "ĠProbably": 20847, "Ġgarner": 20848, "ĠTomas": 20849, "Ġblankets": 20850, "uga": 20851, "jiang": 20852, "Ġrevel": 20853, "ĠHutch": 20854, "llers": 20855, "Ġtrimmed": 20856, "ĠSTR": 20857, "ĠKR": 20858, "ĠPike": 20859, "ĠASS": 20860, "Bay": 20861, "Ġdiagnostic": 20862, "ĠSteph": 20863, "Ġtoured": 20864, "ĠAvoid": 20865, "vic": 20866, "Without": 20867, "ĠClinical": 20868, "Ġblo": 20869, "undo": 20870, "ĠBoise": 20871, "Ġspeculated": 20872, "ĠProt": 20873, "vention": 20874, "Ġscholar": 20875, "ĠSta": 20876, "Featured": 20877, "ĠPrev": 20878, "Ġpenny": 20879, "ĠHath": 20880, "rawn": 20881, "Ġrenovated": 20882, "ĠFried": 20883, "itol": 20884, "uddle": 20885, "Ġinquest": 20886, "Ġmetropolitan": 20887, "lights": 20888, "Ġtempo": 20889, "onom": 20890, "ĠImport": 20891, "Asia": 20892, "Ġowes": 20893, "Ġmagistrate": 20894, "ĠFriedman": 20895, "Ġcontacting": 20896, "Ġstrains": 20897, "Ġhomage": 20898, "Ġlent": 20899, "ception": 20900, "git": 20901, "Ġlively": 20902, "Ġscra": 20903, "WW": 20904, "Ã¶n": 20905, "rill": 20906, "Jack": 20907, "ĠShank": 20908, "iani": 20909, "Ġdecreasing": 20910, "MON": 20911, "ĠSupervisor": 20912, "ĠCats": 20913, "ĠFusion": 20914, "Ġracially": 20915, "ĠTara": 20916, "ĠPurchase": 20917, "ĠRally": 20918, "ĠGraph": 20919, "ĠHello": 20920, "hest": 20921, "ĠVarg": 20922, "Ġdrowned": 20923, "ĠThu": 20924, "ĠWet": 20925, "ĠEug": 20926, "Ġrainbow": 20927, "Ġtelev": 20928, "ĠAmir": 20929, "Based": 20930, "Ġcookie": 20931, "uding": 20932, "Ġcontracting": 20933, "Ġobjected": 20934, "Ġfork": 20935, "acent": 20936, "ĠTil": 20937, "ĠLilly": 20938, "ĠEur": 20939, "Ġhormone": 20940, "Ġnails": 20941, "ĠFischer": 20942, "Ġpier": 20943, "EMENT": 20944, "Ġeruption": 20945, "visory": 20946, "Ġspeculate": 20947, "apan": 20948, "ĠJub": 20949, "ĠHuckabee": 20950, "string": 20951, "stay": 20952, "Ġsustaining": 20953, "VM": 20954, "Ġpriv": 20955, "Ġclos": 20956, "Ġdownloaded": 20957, "ĠIv": 20958, "Ġfinanced": 20959, "ĠSao": 20960, "ĠEverett": 20961, "rene": 20962, "ĠWo": 20963, "ĠPiet": 20964, "Ġengulfed": 20965, "Ġexiting": 20966, "uni": 20967, "horn": 20968, "Ġgrav": 20969, "ection": 20970, "Ġdrainage": 20971, "Ġfuelled": 20972, "Ġorganizational": 20973, "bike": 20974, "ĠAreas": 20975, "Ġpoliceman": 20976, "ĠFirm": 20977, "ĠSlide": 20978, "Ġrand": 20979, "ĠJedi": 20980, "Ge": 20981, "really": 20982, "Manchester": 20983, "ĠWise": 20984, "parent": 20985, "Ġlad": 20986, "Ġurine": 20987, "ĠColombian": 20988, "geon": 20989, "Ġ1961": 20990, "Mania": 20991, "Ġgraph": 20992, "Ġcod": 20993, "fred": 20994, "Ġeffic": 20995, "ĠGateway": 20996, "asket": 20997, "Ġdiminished": 20998, "Mass": 20999, "Ġ205": 21000, "Long": 21001, "Ġgranddaughter": 21002, "Ġshining": 21003, "Semitic": 21004, "Ġarising": 21005, "Ġ330": 21006, "ĠDU": 21007, "ĠZah": 21008, "Ġexclusion": 21009, "ĠClaus": 21010, "Ġven": 21011, "oine": 21012, "ĠAPI": 21013, "reve": 21014, "Ġmilitias": 21015, "Ġfro": 21016, "Ġwaved": 21017, "ĠLuxembourg": 21018, "Ġdiamonds": 21019, "Ġstabilize": 21020, "Ġqueue": 21021, "ĠSponsor": 21022, "Ġeldest": 21023, "ĠLud": 21024, "Ġwasting": 21025, "Ġdimension": 21026, "Ġmotorcycles": 21027, "ucker": 21028, "ĠTav": 21029, "Ġsupremacy": 21030, "Take": 21031, "ĠCPU": 21032, "cup": 21033, "Ġdisregard": 21034, "Ġenvelope": 21035, "ĠCah": 21036, "Ġproposes": 21037, "ĠMaurice": 21038, "Ġhobby": 21039, "Ġharmon": 21040, "Ġribbon": 21041, "ĠOrigin": 21042, "Ġbuilders": 21043, "Ġconj": 21044, "Ġcert": 21045, "eat": 21046, "ĠStern": 21047, "ulia": 21048, "vals": 21049, "cling": 21050, "Ġprovocative": 21051, "Ġsofter": 21052, "Ġ1948": 21053, "Ġremod": 21054, "ĠSob": 21055, "Ġmaxim": 21056, "Ġblueprint": 21057, "oit": 21058, "ĠGarner": 21059, "Ġfibre": 21060, "search": 21061, "ĠWrite": 21062, "270": 21063, "Ġclergy": 21064, "ĠPalo": 21065, "obile": 21066, "Mad": 21067, "Ġclown": 21068, "Ġtraced": 21069, "280": 21070, "ĠAlberto": 21071, "Ġdrums": 21072, "ĠFridays": 21073, "ĠStrat": 21074, "stated": 21075, "ĠStevenson": 21076, "Pr": 21077, "Ġboasted": 21078, "ĠBrees": 21079, "ĠDonn": 21080, "ĠMaya": 21081, "Ġrelieve": 21082, "Ġ1080": 21083, "Ġcheapest": 21084, "Ġuniquely": 21085, "Ġjungle": 21086, "Ġprevalence": 21087, "Ġoutfield": 21088, "ĠMaps": 21089, "Ġaccustomed": 21090, "pac": 21091, "Ġcombinations": 21092, "ĠSoros": 21093, "stad": 21094, "Ġket": 21095, "Ġdisgusting": 21096, "ĠOFF": 21097, "irs": 21098, "Ġbiased": 21099, "Ġpaved": 21100, "iked": 21101, "utterstock": 21102, "ocal": 21103, "Ġsurround": 21104, "ĠGuang": 21105, "Ġspear": 21106, "ĠBellev": 21107, "ortun": 21108, "Rec": 21109, "acho": 21110, "Ġfrightening": 21111, "Ġtyres": 21112, "normal": 21113, "ĠYan": 21114, "ĠWarsaw": 21115, "ĠBod": 21116, "ourse": 21117, "199": 21118, "Ver": 21119, "erent": 21120, "Ġsparkling": 21121, "Ġchanting": 21122, "Ġ1945": 21123, "Ġturbo": 21124, "Ġhazards": 21125, "IRE": 21126, "ĠRonnie": 21127, "Ġsplitting": 21128, "ĠMatte": 21129, "roph": 21130, "Ġtended": 21131, "Ġvandalism": 21132, "alis": 21133, "SY": 21134, "Ġoversaw": 21135, "Happy": 21136, "ĠTC": 21137, "275": 21138, "Ġeco": 21139, "ĠKers": 21140, "Ġextensions": 21141, "ĠFlan": 21142, "ĠCena": 21143, "ĠDowns": 21144, "Ġdrummer": 21145, "Ġawaited": 21146, "ĠACL": 21147, "Ġlegends": 21148, "ĠRollins": 21149, "hend": 21150, "Ġdeparting": 21151, "Ġtha": 21152, "Ġunre": 21153, ".(": 21154, "Ġfaded": 21155, "Ġretirees": 21156, "vid": 21157, "Ġentrants": 21158, "ĠStella": 21159, "arer": 21160, "Ġteaspoon": 21161, "ĠSheridan": 21162, "irc": 21163, "ĠRelief": 21164, "ĠButt": 21165, "Ġris": 21166, "Ġundermined": 21167, "Ġsunk": 21168, "Sam": 21169, "kamp": 21170, "riot": 21171, "rating": 21172, "Ġclubhouse": 21173, "Ġpeaked": 21174, "ĠSki": 21175, "Ġairstrikes": 21176, "Ġconce": 21177, "ĠCPR": 21178, "Ġesp": 21179, "ĠWave": 21180, "ĠColiseum": 21181, "outheastern": 21182, "Ġtrou": 21183, "Ġfeather": 21184, "ĠSoy": 21185, "ĠBihar": 21186, "Ġintervened": 21187, "mits": 21188, "colored": 21189, "330": 21190, "Ġprocession": 21191, "apeake": 21192, "itÃ©": 21193, "riel": 21194, "Ġmart": 21195, "afer": 21196, "ĠGuests": 21197, "ĠPie": 21198, "Ġshiny": 21199, "ĠSixers": 21200, "ĠRoads": 21201, "Ġkicker": 21202, "ĠCrimes": 21203, "Ġfrontier": 21204, "ansen": 21205, "November": 21206, "smith": 21207, "ĠLaun": 21208, "fried": 21209, "weet": 21210, "ĠGrass": 21211, "Ġsanitation": 21212, "ĠEat": 21213, "ĠParts": 21214, "ĠTun": 21215, "amar": 21216, "ĠJupiter": 21217, "ĠFS": 21218, "Ġunsc": 21219, "ĠDone": 21220, "Ġleveraging": 21221, "Ġtucked": 21222, "Ġineffective": 21223, "Ġriots": 21224, "wei": 21225, "ĠAttend": 21226, "Ġpertaining": 21227, "amen": 21228, "monds": 21229, "Ġmism": 21230, "serious": 21231, "ĠViol": 21232, "rous": 21233, "Ġ129": 21234, "uebl": 21235, "umption": 21236, "tri": 21237, "ĠWedding": 21238, "Ġtroopers": 21239, "ĠTHR": 21240, "olving": 21241, "leys": 21242, "Med": 21243, "Ġseparatists": 21244, "Ġimper": 21245, "ĠFrontier": 21246, "Ġwhit": 21247, "ĠMutual": 21248, "Ġrested": 21249, "Ġunhealthy": 21250, "gang": 21251, "Ġresearching": 21252, "ĠColonel": 21253, "Ġaffordability": 21254, "ĠRegarding": 21255, "ĠWend": 21256, "ĠMellon": 21257, "Ġplots": 21258, "Ġcanal": 21259, "PER": 21260, "ĠShopping": 21261, "etry": 21262, "Ġoccurrence": 21263, "Ġgraves": 21264, "BF": 21265, "ĠKau": 21266, "indust": 21267, "Ġbeard": 21268, "uate": 21269, "ĠProdu": 21270, "ĠSomali": 21271, "ishers": 21272, "ĠFell": 21273, "ĠHutchinson": 21274, "Ġhust": 21275, "Ġillustration": 21276, "Ġ//": 21277, "Ġsharks": 21278, "Ġcoincidence": 21279, "Ġremake": 21280, "Ġmural": 21281, "course": 21282, "ĠSultan": 21283, "arse": 21284, "Ġwhip": 21285, "ĠPodcast": 21286, "Ġtightened": 21287, "Ġdenim": 21288, "Ġlandfill": 21289, "future": 21290, "Ġsuperv": 21291, "Hand": 21292, "Ġpraising": 21293, "ĠEly": 21294, "ĠGust": 21295, "ĠMayer": 21296, "Ġorphan": 21297, "Ġrepaired": 21298, "ĠPir": 21299, "Ġspiral": 21300, "husband": 21301, "ienne": 21302, "iatric": 21303, "Ġmarriages": 21304, "Ġhorn": 21305, "plain": 21306, "ĠLum": 21307, "ession": 21308, "ĠFeatures": 21309, "Ġbreakup": 21310, "Ġentrepreneurship": 21311, "rina": 21312, "Ġembargo": 21313, "Ġcapitalism": 21314, "ĠMinor": 21315, "Ġpromo": 21316, "Ġexcel": 21317, "Japan": 21318, "Ġworsening": 21319, "Ġstumbled": 21320, "Ġpins": 21321, "Ġswipe": 21322, "Ġexile": 21323, "Ġseparatist": 21324, "ĠBian": 21325, "Ġrelocation": 21326, "Ġcommanders": 21327, "Ġdowned": 21328, "Ġblogger": 21329, "packed": 21330, "ĠSchn": 21331, "Ġwaterfront": 21332, "ĠYus": 21333, "Ġnegotiator": 21334, "Ġfavourable": 21335, "Iran": 21336, "oulder": 21337, "Ġcance": 21338, "Ġvind": 21339, "angel": 21340, "Ġauthenticity": 21341, "Ġtowel": 21342, "bul": 21343, "ĠNeville": 21344, "ĠBuddhist": 21345, "fields": 21346, "uly": 21347, "Ġniece": 21348, "Ġcorrections": 21349, "Ġassignments": 21350, "ĠSchl": 21351, "Ġharmed": 21352, "375": 21353, "Ġwounding": 21354, "ĠPosition": 21355, "Ġsupermarkets": 21356, "Ġdisclosures": 21357, "Ġ185": 21358, "esp": 21359, "ĠMcCull": 21360, "ĠMale": 21361, "Ġsailors": 21362, "mis": 21363, "ĠSophia": 21364, "Ġunfolded": 21365, "owell": 21366, "ĠScarborough": 21367, "Ġentrepreneurial": 21368, "118": 21369, "ogy": 21370, "ĠLikewise": 21371, "Ġswung": 21372, "Ġdrawings": 21373, "Ġdrafting": 21374, "ĠSimple": 21375, "ĠFilip": 21376, "arf": 21377, "Ġfade": 21378, "Ġmerged": 21379, "ĠLeaf": 21380, "sun": 21381, "Ġflame": 21382, "Ġindices": 21383, "ĠCreate": 21384, "ittle": 21385, "ĠWer": 21386, "ĠMond": 21387, "Ġoz": 21388, "ĠSmoke": 21389, "Ġreplies": 21390, "ĠDH": 21391, "Ġjud": 21392, "ĠFalk": 21393, "Ġ---": 21394, "Ġconstitutes": 21395, "Ġtheat": 21396, "119": 21397, "Ġintermediate": 21398, "vill": 21399, "ĠGow": 21400, "ĠHut": 21401, "ł": 21402, "155": 21403, "ĠLocated": 21404, "ĠDoor": 21405, "Ġsliced": 21406, "aru": 21407, "Ġtearing": 21408, "defense": 21409, "oyer": 21410, "Ġprodu": 21411, "Ġseminar": 21412, "asso": 21413, "Ġpeaks": 21414, "Ġconceal": 21415, "Ġcrypto": 21416, "Ġsetbacks": 21417, "ĠAlicia": 21418, "ĠFAA": 21419, "Ġcontinuity": 21420, "Ġcatastrophe": 21421, "Ġbeg": 21422, "Ġscales": 21423, "apixel": 21424, "Ġsalon": 21425, "Ste": 21426, "Ġlesbian": 21427, "Ġanticip": 21428, "Ġutilization": 21429, "Ġchickens": 21430, "Ġspinal": 21431, "ĠJuliet": 21432, "ĠFas": 21433, "prising": 21434, "ĠSalvation": 21435, "Ġ138": 21436, "Ġutilizing": 21437, "âĢ¢": 21438, "ĠMessenger": 21439, "Ġrebellion": 21440, "ĠAlexand": 21441, "Ġinsect": 21442, "Ġribs": 21443, "ĠBild": 21444, "Ġmonopoly": 21445, "Queen": 21446, "ĠNaples": 21447, "Ġ133": 21448, "Ġhourly": 21449, "Ġego": 21450, "Ġpencil": 21451, "ĠPew": 21452, "Ġdesirable": 21453, "vant": 21454, "ĠLAT": 21455, "Ġperpet": 21456, "lish": 21457, "Ġ201": 21458, "Ġdistances": 21459, "Ġdistressed": 21460, "Work": 21461, "Ġtattoos": 21462, "Ġstereotypes": 21463, "istent": 21464, "ĠCoral": 21465, "fo": 21466, "Ġpayable": 21467, "Ġakin": 21468, "ĠLis": 21469, "ĠFinding": 21470, "Ġsusceptible": 21471, "ĠKiw": 21472, "Ġforgiveness": 21473, "ĠMoment": 21474, "ĠDmitry": 21475, "Ġrenov": 21476, "Ġquint": 21477, "ĠWaterloo": 21478, "ĠReality": 21479, "Ġstray": 21480, "ĠBeaver": 21481, "Ġbites": 21482, "Ġelusive": 21483, "Ġvirtue": 21484, "Ġgadgets": 21485, "Ġlandslide": 21486, "ĠHealthy": 21487, "Ġpits": 21488, "Donnell": 21489, "Ġirony": 21490, "uct": 21491, "Ġpractitioners": 21492, "Ġreck": 21493, "governmental": 21494, "Ġatomic": 21495, "Ġmotiv": 21496, "Ġpolic": 21497, "Ġcommunicated": 21498, "ĠHS": 21499, "Ġcriticize": 21500, "Ġsynerg": 21501, "Del": 21502, "ĠRoe": 21503, "Ġinspirational": 21504, "ĠWarning": 21505, "pel": 21506, "Ġnevertheless": 21507, "Ġdespair": 21508, "Ġ(.": 21509, "Ġfearing": 21510, "Ġgrop": 21511, "tree": 21512, "Ġtrusts": 21513, "Ġinterviewing": 21514, "amic": 21515, "Ġscor": 21516, "ject": 21517, "Another": 21518, "pose": 21519, "Ġdepicted": 21520, "ĠPhotography": 21521, "ĠLenovo": 21522, "ĠEpic": 21523, "ĠBoot": 21524, "GI": 21525, "enses": 21526, "Class": 21527, "arity": 21528, "Ġservicing": 21529, "ĠHann": 21530, "Ġawe": 21531, "Ġoverdoses": 21532, "ĠFinnish": 21533, "Ġpav": 21534, "ĠPCs": 21535, "SEC": 21536, "ĠStro": 21537, "Ġattracts": 21538, "Ġapprehended": 21539, "128": 21540, "Ġunstable": 21541, "ĠOutdoor": 21542, "Ġcloth": 21543, "ĠUlster": 21544, "Ġvisually": 21545, "Ġsculpt": 21546, "Ġsufficiently": 21547, "ĠKendrick": 21548, "Ġengages": 21549, "Ġknives": 21550, "ĠGut": 21551, "Ġarbit": 21552, "osition": 21553, "Ġemoji": 21554, "Ġpinpoint": 21555, "Ġremembering": 21556, "rence": 21557, "ĠVish": 21558, "Ġimproperly": 21559, "Ġranc": 21560, "Ġupstream": 21561, "Ġcheckpoint": 21562, "Ġrash": 21563, "eson": 21564, "Ġtoes": 21565, "260": 21566, "Ġinvalid": 21567, "Ġonions": 21568, "Ġlashed": 21569, "ĠDong": 21570, "Ġprovisional": 21571, "ĠFern": 21572, "Ġirresponsible": 21573, "actively": 21574, "ĠKnown": 21575, "Ġben": 21576, "ĠBlank": 21577, "Ġactresses": 21578, "paying": 21579, "Ġsyrup": 21580, "isman": 21581, "Ġeducating": 21582, "Sunday": 21583, "ifiable": 21584, "Post": 21585, "Ġcalculation": 21586, "Ġhesitate": 21587, "ĠIncreasing": 21588, "Ġreeling": 21589, "ĠDairy": 21590, "ensing": 21591, "Ġmaternity": 21592, "Ø": 21593, "./": 21594, "ĠElm": 21595, "Ġweddings": 21596, "ĠYard": 21597, "117": 21598, "ĠRocket": 21599, "OF": 21600, "Ġtreasurer": 21601, "Ġrattled": 21602, "ĠDrop": 21603, "arel": 21604, "ĠFulton": 21605, "ĠGiant": 21606, "ĠFloor": 21607, "Jet": 21608, "ikk": 21609, "ĠBucs": 21610, "ostics": 21611, "reme": 21612, "ĠRouse": 21613, "Ġdeliber": 21614, "ĠEle": 21615, "Ġconducts": 21616, "ĠBlog": 21617, "connected": 21618, "Ġprayed": 21619, "Ġcolourful": 21620, "Ġaugmented": 21621, "Ġbatted": 21622, "Ġrelevance": 21623, "ĠRomanian": 21624, "acqu": 21625, "ĠChel": 21626, "ĠClo": 21627, "ĠGraves": 21628, "Ġchees": 21629, "ĠGibbs": 21630, "CLE": 21631, "Ġfertility": 21632, "Ġambul": 21633, "Ġspecs": 21634, "ĠIRA": 21635, "ĠBooth": 21636, "ithe": 21637, "ĠPlayoff": 21638, "ammed": 21639, "Ġcollaborating": 21640, "Ġlunar": 21641, "Ġconfronting": 21642, "Ġattribute": 21643, "King": 21644, "riz": 21645, "Ġcasualty": 21646, "acia": 21647, "waters": 21648, "Ġpaving": 21649, "Ġcaregivers": 21650, "nor": 21651, "Ġreacting": 21652, "ĠHash": 21653, "Ġsqueezed": 21654, "Ġexert": 21655, "ĠMichele": 21656, "ĠConc": 21657, "ĠHep": 21658, "Ġsewage": 21659, "wart": 21660, "GY": 21661, "Ġdiscourage": 21662, "ĠFir": 21663, "Ġtextile": 21664, "ĠSpice": 21665, "ĠFah": 21666, "Ġcomplainant": 21667, "Ġinstinct": 21668, "camp": 21669, "ĠEdison": 21670, "ĠVIDEOS": 21671, "LM": 21672, "ĠSands": 21673, "About": 21674, "Ġdisk": 21675, "brid": 21676, "Ġmuted": 21677, "ACC": 21678, "Ġwre": 21679, "event": 21680, "Ġicons": 21681, "Express": 21682, "udes": 21683, "ĠBeatles": 21684, "color": 21685, "ĠHaas": 21686, "ĠWolfe": 21687, "ĠYOUR": 21688, "Ġaccessibility": 21689, "ĠCornwall": 21690, "Ġing": 21691, "Ġatrocities": 21692, "weather": 21693, "ĠDominion": 21694, "ĠMIL": 21695, "ĠLara": 21696, "Ġunravel": 21697, "Ġmaneuver": 21698, "Ġfoam": 21699, "ribe": 21700, "CI": 21701, "Ġcandles": 21702, "acs": 21703, ")(": 21704, "coon": 21705, "ĠPurple": 21706, "ĠGovernors": 21707, "ĠKeystone": 21708, "ĠYuk": 21709, "file": 21710, "Ġviol": 21711, "gery": 21712, "370": 21713, "train": 21714, "Ġgunshots": 21715, "olin": 21716, "Ġviruses": 21717, "ĠTex": 21718, "hours": 21719, "Ġprev": 21720, "ĠRid": 21721, "ected": 21722, "ĠVog": 21723, "riers": 21724, "Ġmurdering": 21725, "ĠIz": 21726, "Ġdeliberations": 21727, "arming": 21728, "unda": 21729, "Ġrink": 21730, "ĠDrugs": 21731, "idered": 21732, "Ġforge": 21733, "Ġexpansive": 21734, "VIEW": 21735, "ĠBots": 21736, "Ġswitches": 21737, "KO": 21738, "atten": 21739, "Ġvariants": 21740, "ĠVirtual": 21741, "ĠCoch": 21742, "yon": 21743, "ĠKai": 21744, "Ġbullied": 21745, "iday": 21746, "version": 21747, "Ġlib": 21748, "ĠCec": 21749, "igated": 21750, "ĠTRUMP": 21751, "ĠPod": 21752, "Ġtoppled": 21753, "Ġeyeing": 21754, "ĠPatients": 21755, "techn": 21756, "Ġhampered": 21757, "Ġavert": 21758, "ĠScheme": 21759, "ĠCorm": 21760, "Ġpony": 21761, "Ġzoom": 21762, "abo": 21763, "Ġsleeves": 21764, "lane": 21765, "ĠLester": 21766, "ĠDane": 21767, "Ġcough": 21768, "Ġsignings": 21769, "HER": 21770, "Ġsibling": 21771, "Ġredemption": 21772, "Ġstockp": 21773, "ĠAlgeria": 21774, "Ġpadd": 21775, "ĠBrenda": 21776, "uchi": 21777, "Ġtransporting": 21778, "Ġspeculative": 21779, "ĠSek": 21780, "abal": 21781, "Ġshipment": 21782, "oker": 21783, "Ġwarranty": 21784, "atan": 21785, "Ġblister": 21786, "ĠCelebration": 21787, "Ġwal": 21788, "Ġlac": 21789, "Ġprioritize": 21790, "ression": 21791, "BP": 21792, "Ġcollaborated": 21793, "ĠNewsletter": 21794, "ĠDamian": 21795, "ĠResidential": 21796, "Ġgra": 21797, "Ġfeasible": 21798, "ĠCrest": 21799, "ĠBean": 21800, "ĠSturgeon": 21801, "ĠTale": 21802, "ĠContin": 21803, "ĠMush": 21804, "Ġrocking": 21805, "ĠMane": 21806, "ĠHumane": 21807, "resistant": 21808, "ĠFra": 21809, "highest": 21810, "fts": 21811, "Ġamassed": 21812, "ĠPavilion": 21813, "ĠSkin": 21814, "Ġunfold": 21815, "Ġresur": 21816, "ĠPET": 21817, "model": 21818, "Ġemploying": 21819, "Ġrude": 21820, "Ġirrelevant": 21821, "angu": 21822, "Page": 21823, "PN": 21824, "igator": 21825, "ĠReb": 21826, "ĠArrest": 21827, "ĠGund": 21828, "Ġmalls": 21829, "zhen": 21830, "wed": 21831, "Ġdaring": 21832, "Ġfactual": 21833, "ĠGent": 21834, "Ġinforming": 21835, "ĠStri": 21836, "ĠLounge": 21837, ".]": 21838, "ĠTribunal": 21839, "ĠMoines": 21840, "Ġshadows": 21841, "generated": 21842, "fulness": 21843, "Ġheartfelt": 21844, "ĠLivingston": 21845, "ĠClerk": 21846, "Ġnationalism": 21847, "ĠMiche": 21848, "balls": 21849, "anos": 21850, "agle": 21851, "Ġprejudice": 21852, "Ġevenly": 21853, "Ġswearing": 21854, "Ġexits": 21855, "Ġcondemning": 21856, "Ġvanilla": 21857, "club": 21858, "ĠFunding": 21859, "ĠDover": 21860, "Ġhots": 21861, "Ġfres": 21862, "Ġgoodness": 21863, "ĠMcKay": 21864, "Ġbulls": 21865, "avia": 21866, "129": 21867, "Ġ1947": 21868, "Ġdefamation": 21869, "ĠMoran": 21870, "irms": 21871, "ĠFitz": 21872, "ĠRossi": 21873, "urated": 21874, "Ġvariation": 21875, "ĠBauer": 21876, "ĠSchro": 21877, "Ġcolony": 21878, "ĠParliamentary": 21879, "ikan": 21880, "Ġstirring": 21881, "ĠSheldon": 21882, "Ġaccessory": 21883, "ĠUtilities": 21884, "Ġnab": 21885, "Ġpract": 21886, "Ġherein": 21887, "ĠRole": 21888, "ĠMant": 21889, "Ġpharm": 21890, "Ġ215": 21891, "ĠNGO": 21892, "ĠAnything": 21893, "ĠMacedonia": 21894, "Ġbree": 21895, "ĠWTO": 21896, "Chicago": 21897, "ĠProtect": 21898, "quarters": 21899, "ĠGrassley": 21900, "ĠInteractive": 21901, "ĠInterview": 21902, "Ġ550": 21903, "Ġastronauts": 21904, "Ġfreak": 21905, "ĠIntegrated": 21906, "Ġindict": 21907, "Ġgenerators": 21908, "acio": 21909, "Kevin": 21910, "Ġvaccination": 21911, "Ġblockade": 21912, "ĠSons": 21913, "Ġcapita": 21914, "ĠAnita": 21915, "ĠExport": 21916, "ĠNex": 21917, "ĠAram": 21918, "Ġzinc": 21919, "Ġrevamped": 21920, "Ġselective": 21921, "Ġmanipulate": 21922, "ĠBedford": 21923, "ĠBattery": 21924, "Ġqualifiers": 21925, "lean": 21926, "Ġscrew": 21927, "film": 21928, "ror": 21929, "ĠEllison": 21930, "ombo": 21931, "ĠOst": 21932, "165": 21933, "Ġslaves": 21934, "ĠPayton": 21935, "Ġbarg": 21936, "Ġrugged": 21937, "ĠWinn": 21938, "ĠHammer": 21939, "ĠUPS": 21940, "Euro": 21941, "Ġunfamiliar": 21942, "Ġdistract": 21943, "Ġbuffer": 21944, "ledge": 21945, "Ġtrunk": 21946, "Ġ320": 21947, "122": 21948, "Ġdilemma": 21949, "Ġpra": 21950, "Ġutmost": 21951, "Ġcampaigners": 21952, "icular": 21953, "eful": 21954, "ï¿½": 21955, "ĠHQ": 21956, "neau": 21957, "Ġsir": 21958, "test": 21959, "Company": 21960, "Ġrescind": 21961, "ardon": 21962, "MG": 21963, "Gov": 21964, "ĠRaz": 21965, "Ġrod": 21966, "fed": 21967, "Ġpsych": 21968, "Ġunin": 21969, "ĠArbor": 21970, "Ġnewcomer": 21971, "ĠEdwin": 21972, "raising": 21973, "quist": 21974, "Ġdiscoveries": 21975, "Steve": 21976, "Ġscramble": 21977, "js": 21978, "Ġacoustic": 21979, "Ġdeterioration": 21980, "Ġobserving": 21981, "ĠWinning": 21982, "ĠSaban": 21983, "idy": 21984, "Ġoverd": 21985, "Ġscouting": 21986, "Ġpunitive": 21987, "ĠShelter": 21988, "Ġmocked": 21989, "Ġdreamed": 21990, "Ġinvaluable": 21991, "LP": 21992, "standard": 21993, "Ġrecounted": 21994, "ĠSabres": 21995, "points": 21996, "Ġfringe": 21997, "ĠBarker": 21998, "alian": 21999, "ĠPROV": 22000, "Ġcartel": 22001, "Ġovercrowd": 22002, "tain": 22003, "Year": 22004, "ĠWelfare": 22005, "ĠChr": 22006, "Ġintroduces": 22007, "ĠDoing": 22008, "ĠGlover": 22009, "Ġdeteriorating": 22010, "Par": 22011, "Ġattendant": 22012, "ĠMold": 22013, "ĠFlying": 22014, "ovan": 22015, "Ġoptimize": 22016, "Ġchapters": 22017, "Ġdull": 22018, "gay": 22019, "ĠATP": 22020, "ĠKah": 22021, "ainer": 22022, "feet": 22023, "Ġjoking": 22024, "Ġdisadvantage": 22025, "Rep": 22026, "Ġtwisted": 22027, "Ġslain": 22028, "Ġcomprise": 22029, "Ġrestricting": 22030, "Ġdispos": 22031, "Ġshaky": 22032, "Ġembattled": 22033, "owe": 22034, "conscious": 22035, "oken": 22036, "Ġmistaken": 22037, "ĠDra": 22038, "Ġreservoir": 22039, "Ġspate": 22040, "Scott": 22041, "avor": 22042, "Ġqual": 22043, "amel": 22044, "hunt": 22045, "ĠChevy": 22046, "Ġclaw": 22047, "Ġwitch": 22048, "ĠZimmerman": 22049, "arium": 22050, "Ġrubbish": 22051, "Ġstrings": 22052, "Ġdoc": 22053, "Ġplaque": 22054, "ĠCyr": 22055, "Ġflourish": 22056, "Ġworthwhile": 22057, "Ġbanners": 22058, "ĠLemon": 22059, "ĠRainbow": 22060, "Ġconsisted": 22061, "ĠHOW": 22062, "Ñ": 22063, "Ġblogs": 22064, "CLUS": 22065, "eely": 22066, "Ġbeast": 22067, "ĠMai": 22068, "Ġhostility": 22069, "eros": 22070, "Ġforeseeable": 22071, "ĠCorker": 22072, "ĠWEEK": 22073, "visors": 22074, "ressive": 22075, "ĠViktor": 22076, "Ġbureaucracy": 22077, "Ġ256": 22078, "ĠFeel": 22079, "ĠAdventure": 22080, "Ġefficacy": 22081, "ĠInstitution": 22082, "ĠHarbaugh": 22083, "ĠPractice": 22084, "ĠChristianity": 22085, "Thanks": 22086, "Ġfridge": 22087, "idel": 22088, "Ġeff": 22089, "Ġvein": 22090, "terms": 22091, "Ġignorance": 22092, "Ġscream": 22093, "Ġwit": 22094, "ĠRousse": 22095, "ĠWillow": 22096, "Ġhallway": 22097, "former": 22098, "Ġshooters": 22099, "ĠReporting": 22100, "Ġgal": 22101, "Ġsavvy": 22102, "rand": 22103, "Ġremed": 22104, "ĠBaron": 22105, "inar": 22106, "Ġseizures": 22107, "ĠThorn": 22108, "ĠProtesters": 22109, "ĠRevolutionary": 22110, "think": 22111, "ĠCabrera": 22112, "Four": 22113, "ĠRudd": 22114, "Ġprost": 22115, "ĠBottom": 22116, "Port": 22117, "nas": 22118, "ifax": 22119, "Wire": 22120, "Ġtokens": 22121, "antis": 22122, "ĠSOU": 22123, "ĠMilk": 22124, "asters": 22125, "Ġshrimp": 22126, "Ġcakes": 22127, "blue": 22128, "ifty": 22129, "View": 22130, "adium": 22131, "fen": 22132, "zyk": 22133, "ĠEmil": 22134, "Ġdismay": 22135, "Ġtilt": 22136, "aska": 22137, "Young": 22138, "Ġpredators": 22139, "Ġovershadowed": 22140, "mitt": 22141, "ĠSemin": 22142, "ĠSchiff": 22143, "ĠClarkson": 22144, "212": 22145, "210": 22146, "Ġvanished": 22147, "Ġmesh": 22148, "ĠBurnett": 22149, "ĠMent": 22150, "ĠBlind": 22151, "ĠPatriot": 22152, "ĠVil": 22153, "Ġflick": 22154, "ĠTowns": 22155, "ĠWhites": 22156, "Ġspice": 22157, "ĠMode": 22158, "Ġnominate": 22159, "Ġwrest": 22160, "ĠAshes": 22161, "Ġrows": 22162, "ĠClint": 22163, "Ġgentleman": 22164, "utan": 22165, "athlon": 22166, "ĠIntermediate": 22167, "hews": 22168, "Ġoffended": 22169, "ĠPaige": 22170, "ĠFinch": 22171, "ĠAboriginal": 22172, "positive": 22173, "Stop": 22174, "Ġrenting": 22175, "Ġ[âĢ¦]": 22176, "ĠHert": 22177, "Ġvegetation": 22178, "apes": 22179, "ĠCanon": 22180, "appa": 22181, "Ġabst": 22182, "ĠKatz": 22183, "Ġsurfing": 22184, "aghan": 22185, "ĠPresidency": 22186, "Ġscaling": 22187, "ĠSas": 22188, "Ġpeanut": 22189, "Ġrecommending": 22190, "cious": 22191, "endez": 22192, "eker": 22193, "ĠKamp": 22194, "Ġsitcom": 22195, "Ġcrust": 22196, "women": 22197, "ĠJes": 22198, "ĠWhe": 22199, "ĠWarwick": 22200, "Ġepit": 22201, "ĠAlc": 22202, "Ġdictate": 22203, "ĠSPORTS": 22204, "ĠLanguage": 22205, "Ġindicative": 22206, "ĠMacDonald": 22207, "Ġreorgan": 22208, "Ġ`": 22209, "ARS": 22210, "Ġliberation": 22211, "Ġbless": 22212, "Ġreflective": 22213, "Ġà¤": 22214, "Ġdesires": 22215, "ĠHank": 22216, "ĠLaunch": 22217, "Ġrotating": 22218, "ĠStones": 22219, "Ġcoordinating": 22220, "ĠZeit": 22221, "Ġskepticism": 22222, "ĠAlam": 22223, "ĠTrout": 22224, "ĠSMS": 22225, "ĠCrescent": 22226, "ĠTeacher": 22227, "Ġfury": 22228, "Ġeyebrows": 22229, "onga": 22230, "ĠPilot": 22231, "ĠRutherford": 22232, "Ġinterstate": 22233, "established": 22234, "Ġbaggage": 22235, "Ġ131": 22236, "riks": 22237, "mil": 22238, "Ġneon": 22239, "Ġqueer": 22240, "ourced": 22241, "ĠKash": 22242, "ĠEleven": 22243, "illes": 22244, "ĠOpportun": 22245, "Ġstre": 22246, "Washington": 22247, "ĠDifferent": 22248, "Ġexempl": 22249, "Ġboarded": 22250, "Ġrogue": 22251, "ĠDNC": 22252, "rone": 22253, "Ġreversing": 22254, "nine": 22255, "ĠIvory": 22256, "itating": 22257, "uve": 22258, "Ġfracture": 22259, "255": 22260, "ĠAssessment": 22261, "Ġsubjective": 22262, "Ġfluct": 22263, "ĠJaguar": 22264, "Ġstride": 22265, "Ġreapp": 22266, "ĠGrow": 22267, "against": 22268, "ĠMedina": 22269, "scenes": 22270, "ĠNieto": 22271, "Ġsou": 22272, "ĠFleming": 22273, "Ġnarcotics": 22274, "ĠBere": 22275, "ĠBub": 22276, "ĠAck": 22277, "Ġvinyl": 22278, "ĠCopy": 22279, "ĠGarland": 22280, "ĠDuty": 22281, "Ġinn": 22282, "Ġmerchant": 22283, "Ġactivate": 22284, "Ġglowing": 22285, "ettle": 22286, "ĠBran": 22287, "Ġsilk": 22288, "anco": 22289, "TL": 22290, "ĠFurn": 22291, "Ġwithheld": 22292, "Ġpulse": 22293, "ĠGU": 22294, "BUS": 22295, "ĠHyper": 22296, "Ġpicnic": 22297, "Ġpositives": 22298, "ĠParamount": 22299, "Ġ737": 22300, "Ġenlisted": 22301, "ĠValerie": 22302, "false": 22303, "ĠChocolate": 22304, "ĠSTAR": 22305, "Ġdescended": 22306, "Ġtasty": 22307, "ĠDaesh": 22308, "ĠNed": 22309, "Ġcomplimentary": 22310, "Ġdepicting": 22311, "ĠHavana": 22312, "college": 22313, "Ġtraces": 22314, "Ġundue": 22315, "ĠSisters": 22316, "aum": 22317, "ĠCourier": 22318, "ĠOng": 22319, "ĠSparks": 22320, "ongs": 22321, "ĠYong": 22322, "URR": 22323, "los": 22324, "Ġhorsepower": 22325, "confidence": 22326, "ĠPett": 22327, "ĠMeasure": 22328, "Ġmarches": 22329, "zig": 22330, "ĠTOR": 22331, "Ġexported": 22332, "ĠRak": 22333, "ĠInvestigations": 22334, "Ġterminate": 22335, "ĠTian": 22336, "Ġmasters": 22337, "ĠDS": 22338, "Ġoutraged": 22339, "ĠCups": 22340, "ĠWeir": 22341, "exec": 22342, "Ġjourneys": 22343, "Ġabide": 22344, "Ġavail": 22345, "ĠStreets": 22346, "Ġfixes": 22347, "Ġcocoa": 22348, "Ġabundant": 22349, "Ġhubs": 22350, "mort": 22351, "Ġrobberies": 22352, "ĠBark": 22353, "Ġprecautions": 22354, "Ġhammered": 22355, "ometric": 22356, "mith": 22357, "ĠMcCann": 22358, "ĠJaw": 22359, "ĠQuest": 22360, "ĠMcF": 22361, "Ġlob": 22362, "Ġlegalized": 22363, "Ġquirky": 22364, "Ġtrailers": 22365, "ĠIndividual": 22366, "Ġcumulative": 22367, "Ġenlarge": 22368, "Ġconvoy": 22369, "olen": 22370, "got": 22371, "landers": 22372, "Ġscanner": 22373, "Ġscans": 22374, "ĠEg": 22375, "prof": 22376, "Ġhosp": 22377, "ĠColo": 22378, "Ġerr": 22379, "Ġdeval": 22380, "ĠUsually": 22381, "Ġbul": 22382, "ummy": 22383, "Ġtandem": 22384, "occupied": 22385, "Ġmandates": 22386, "ĠSwim": 22387, "121": 22388, "ussed": 22389, "EF": 22390, "Ġfries": 22391, "Until": 22392, "rc": 22393, "Ġbadge": 22394, "Ġstrips": 22395, "Ġmagnet": 22396, "Ġarchive": 22397, "stan": 22398, "ĠDeadline": 22399, "Ġdisposable": 22400, "Ġbob": 22401, "Ġnorthwestern": 22402, "Jul": 22403, "ĠSAL": 22404, "Ġinfluencing": 22405, "Ġdevil": 22406, "ĠEllie": 22407, "cms": 22408, "ingo": 22409, "888": 22410, "Ġcosmetic": 22411, "Also": 22412, "Ġyacht": 22413, "Ġlazy": 22414, "Ġmerc": 22415, "Ġabsorbed": 22416, "harm": 22417, "116": 22418, "Ġsubpoena": 22419, "Ġcounters": 22420, "ĠLori": 22421, "Ġrandomly": 22422, "nea": 22423, "waves": 22424, "Ġrelie": 22425, "ĠKiss": 22426, "Ġchassis": 22427, "Ġbakery": 22428, "Images": 22429, "ĠHolden": 22430, "Ġamazed": 22431, "Ġalignment": 22432, "ĠPowers": 22433, "Ġlabelled": 22434, "Ġstaunch": 22435, "Ġsignaling": 22436, "Ġsenate": 22437, "Ġunconventional": 22438, "ĠAlternative": 22439, "Ġambassadors": 22440, "ĠVPN": 22441, "atics": 22442, "Ġmosquito": 22443, "ĠScholarship": 22444, "Ġhelpless": 22445, "alone": 22446, "ZA": 22447, "chel": 22448, "Ġconstituencies": 22449, "ĠCafÃ©": 22450, "Ġhatch": 22451, "ĠRupert": 22452, "Ġrendering": 22453, "Ġreinstated": 22454, "Ġinterval": 22455, "Texas": 22456, "ĠAHL": 22457, "February": 22458, "review": 22459, "Ġgle": 22460, "Ġfals": 22461, "Ġmarkers": 22462, "Ġgovernmental": 22463, "ĠPos": 22464, "Ġarose": 22465, "every": 22466, "Ġrulings": 22467, "obar": 22468, "Govern": 22469, "gren": 22470, "isan": 22471, "Ġmarketed": 22472, "Click": 22473, "Ġord": 22474, "Ġballoons": 22475, "asers": 22476, "ĠHorton": 22477, "pub": 22478, "ĠAerospace": 22479, "Ġflank": 22480, "Ġmolecular": 22481, "bour": 22482, "nuts": 22483, "Ġalliances": 22484, "Ġbenchmarks": 22485, "ocate": 22486, "stadt": 22487, "ĠGoodwin": 22488, "lap": 22489, "ĠFactors": 22490, "Never": 22491, "ĠNem": 22492, "Ġroadside": 22493, "orth": 22494, "Ġexhibited": 22495, "ĠPearce": 22496, "ĠOlsen": 22497, "Ġpostal": 22498, "ĠLiberation": 22499, "reen": 22500, "mary": 22501, "Ġropes": 22502, "Ġlarg": 22503, "Ġgob": 22504, "boys": 22505, "ĠSax": 22506, "Ġreimbursement": 22507, "ĠVie": 22508, "ĠCatholics": 22509, "ĠMartial": 22510, "Ġpremiered": 22511, "Ġawaits": 22512, "ĠUnderstanding": 22513, "ĠBelarus": 22514, "ĠVor": 22515, "ogi": 22516, "iaz": 22517, "Ġvictorious": 22518, "Ġancestors": 22519, "Ġwreckage": 22520, "Ġoppression": 22521, "ĠChildhood": 22522, "Ġwidth": 22523, "ĠPlymouth": 22524, "ĠFifty": 22525, "Ġoccupancy": 22526, "etts": 22527, "ĠFiscal": 22528, "lifting": 22529, "ĠTraditional": 22530, "Ġnostalgia": 22531, "Law": 22532, "Ġlays": 22533, "Ġarresting": 22534, "Ġanticipating": 22535, "Ġinsults": 22536, "ĠExtension": 22537, "Ġgenerator": 22538, "ummer": 22539, "Ġageing": 22540, "Ġbouncing": 22541, "ember": 22542, "ĠWAR": 22543, "ĠNico": 22544, "ĠWow": 22545, "ĠRaven": 22546, "flower": 22547, "ĠCrim": 22548, "bh": 22549, "Ġundo": 22550, "Ġburgers": 22551, "roud": 22552, "ĠAtkinson": 22553, "ĠYEAR": 22554, "Ġpoorer": 22555, "ICA": 22556, "ĠSchedule": 22557, "Ġstronghold": 22558, "ĠMillennium": 22559, "Ġ###": 22560, "ilda": 22561, "ĠGH": 22562, "Ġupscale": 22563, "aldi": 22564, "ĠResolution": 22565, "Ġswelling": 22566, "Ġgrieving": 22567, "ĠNile": 22568, "ĠTig": 22569, "ERY": 22570, "ooth": 22571, "BALL": 22572, "Ġballet": 22573, "Ġbucks": 22574, "ĠUV": 22575, "akin": 22576, "Ġchilling": 22577, "Ġdatabases": 22578, "ĠGD": 22579, "section": 22580, "Ġhires": 22581, "Ġmul": 22582, "Ġsen": 22583, "ĠTownsend": 22584, "Ġinspected": 22585, "ilic": 22586, "Ġdiscriminatory": 22587, "fol": 22588, "Ġalcoholic": 22589, "ĠHoff": 22590, "Carl": 22591, "Ġvicinity": 22592, "lein": 22593, "ĠEco": 22594, "ĠGovern": 22595, "Ġsecrecy": 22596, "aned": 22597, "ĠDUP": 22598, "Ġ570": 22599, "Ġsow": 22600, "Ġstalls": 22601, "Ġinsulting": 22602, "ĠDT": 22603, "Ġinforms": 22604, "fitting": 22605, "ĠDepending": 22606, "ĠMelanie": 22607, "ĠThom": 22608, "path": 22609, "Ġadmired": 22610, "Peter": 22611, "idents": 22612, "ielding": 22613, "ĠShanahan": 22614, "TD": 22615, "Things": 22616, "sn": 22617, "Ġconstituted": 22618, "Ġ137": 22619, "Ġderailed": 22620, "ĠBonnie": 22621, "Ġgraffiti": 22622, "Ġearnest": 22623, "Ġcompliant": 22624, "blown": 22625, "Ġalle": 22626, "prise": 22627, "Ġfocal": 22628, "Ġgentlemen": 22629, "ĠTalks": 22630, "Ġpassports": 22631, "Ġdeprived": 22632, "Ġdude": 22633, "ĠNath": 22634, "Ġgoverned": 22635, "Ġsac": 22636, "Ġcastle": 22637, "qv": 22638, "Ġtolerated": 22639, "ĠSci": 22640, "close": 22641, "ĠDynamics": 22642, "Ġflashing": 22643, "yk": 22644, "ĠConsolid": 22645, "Ġinherently": 22646, "ĠForrest": 22647, "Gene": 22648, "Public": 22649, "Ġloser": 22650, "runners": 22651, "Ġprudent": 22652, "Ġpioneering": 22653, "ĠHowe": 22654, "ĠButter": 22655, "ĠArabian": 22656, "acha": 22657, "ĠBBQ": 22658, "ĠMineral": 22659, "Ġdestiny": 22660, "Ġretrieve": 22661, "ĠBav": 22662, "reth": 22663, "oby": 22664, "ĠGrid": 22665, "Ġgrievances": 22666, "ĠTips": 22667, "Ġadamant": 22668, "Ġdiets": 22669, "Ġmilestones": 22670, "Ġcollects": 22671, "ĠLaboratories": 22672, "ĠWC": 22673, "Ġpostp": 22674, "Ġdams": 22675, "ĠOEM": 22676, "Ġrumor": 22677, "Ġlocking": 22678, "Ġemission": 22679, "Ġqueries": 22680, "Jones": 22681, "Ġlang": 22682, "ĠAcqu": 22683, "ĠMedium": 22684, "ĠTreasurer": 22685, "Sept": 22686, "FB": 22687, "Ġintegrating": 22688, "Ġbolstered": 22689, "Ġincorporating": 22690, "encers": 22691, "Ġirregularities": 22692, "Ġnom": 22693, "iod": 22694, "ĠAi": 22695, "Ġsor": 22696, "anked": 22697, "Ġrehears": 22698, "fig": 22699, "ĠBug": 22700, "hoff": 22701, "Ġtrooper": 22702, "Ġgalaxy": 22703, "amon": 22704, "ĠAtlas": 22705, "Ġsolicit": 22706, "Ġsings": 22707, "ĠInstructions": 22708, "ĠMig": 22709, "thinking": 22710, "ĠCostco": 22711, "Ġbreasts": 22712, "Ġportraits": 22713, "ĠCock": 22714, "Ġsubscriptions": 22715, "Ġpine": 22716, "Ġhaunted": 22717, "ĠMED": 22718, "eer": 22719, "ega": 22720, "ĠZa": 22721, "ENN": 22722, "ĠWinners": 22723, "aith": 22724, "safe": 22725, "Ġ143": 22726, "ĠWeston": 22727, "ĠLansing": 22728, "ĠLaurel": 22729, "ocrat": 22730, "ograph": 22731, "Ġmatchups": 22732, "ĠFriend": 22733, "Ġdigest": 22734, "Ġdimensions": 22735, "azing": 22736, "Ġtipping": 22737, "Ġenrich": 22738, "gart": 22739, "argo": 22740, "Ġoutbreaks": 22741, "Ġsalvage": 22742, "ĠErica": 22743, "Ġmodules": 22744, "ĠPDF": 22745, "ĠGoods": 22746, "oots": 22747, "2011": 22748, "Ġinterrupt": 22749, "Ġradi": 22750, "ĠSimone": 22751, "vell": 22752, "ĠSV": 22753, "extremely": 22754, "Ġstadiums": 22755, "ĠRox": 22756, "Ġconflicting": 22757, "Ġyouthful": 22758, "ĠUM": 22759, "series": 22760, "Ġded": 22761, "Ġfielding": 22762, "Pre": 22763, "itled": 22764, "Ġstreamed": 22765, "Ġapprentices": 22766, "ĠAlec": 22767, "ĠGap": 22768, "ĠPrem": 22769, "Ġleased": 22770, "Ġdeepening": 22771, "Ġbounds": 22772, "Ġrethink": 22773, "ĠVoting": 22774, "ĠScha": 22775, "blood": 22776, "ĠReeves": 22777, "Ġbells": 22778, "Ġcollector": 22779, "ĠCrimson": 22780, "ĠWheat": 22781, "207": 22782, "ĠHB": 22783, "ĠBCC": 22784, "Ġsync": 22785, "ĠAnders": 22786, "Ġthanking": 22787, "Ġlayoffs": 22788, "Ġfoolish": 22789, "Ġcustod": 22790, "Ġelephants": 22791, "Ġcorrelation": 22792, "ĠHarding": 22793, "ĠGPU": 22794, "ĠBarnett": 22795, "Ġol": 22796, "Ġalarms": 22797, "Ġfluctuations": 22798, "shop": 22799, "Ġcommentators": 22800, "ĠAlpine": 22801, "Ġmur": 22802, "Ġbiotech": 22803, "Ġunlocked": 22804, "ouri": 22805, "roe": 22806, "ĠPayment": 22807, "ĠPOL": 22808, "ĠGuest": 22809, "Ġphrases": 22810, "ĠBuilt": 22811, "erves": 22812, "Ġnutritional": 22813, "205": 22814, "ourage": 22815, "Related": 22816, "Come": 22817, "ĠSAT": 22818, "Ġgatherings": 22819, "Ġsquads": 22820, "Ġorganising": 22821, "Ġministerial": 22822, "Ġkilomet": 22823, "ĠJump": 22824, "ĠStrength": 22825, "ĠFerr": 22826, "Ġillustrated": 22827, "ĠOber": 22828, "Ġextrad": 22829, "Ġlimitation": 22830, "idis": 22831, "ĠMonths": 22832, "ifts": 22833, "Ġmotives": 22834, "Ġmaternal": 22835, "Ġbait": 22836, "Ġadversity": 22837, "Twitter": 22838, "ĠUni": 22839, "Ġgrappling": 22840, "Ġbowls": 22841, "ĠHib": 22842, "ĠCopenhagen": 22843, "Ġsergeant": 22844, "Ġintro": 22845, "Ġscrambled": 22846, "ĠExc": 22847, "Ġshowcases": 22848, "Ġplotting": 22849, "Ġsym": 22850, "ĠNah": 22851, "berries": 22852, "itching": 22853, "conn": 22854, "istle": 22855, "ĠBeginning": 22856, "asley": 22857, "ĠMeadow": 22858, "ĠCra": 22859, "Ġsupremacist": 22860, "Ġsweats": 22861, "production": 22862, "innon": 22863, "ovo": 22864, "Ġscept": 22865, "Ġdrowning": 22866, "ĠEh": 22867, "Ġdecorations": 22868, "Ġsympathetic": 22869, "raction": 22870, "Ġ195": 22871, "ripp": 22872, "ĠNotice": 22873, "charging": 22874, "ĠDIY": 22875, "ĠJin": 22876, "Ġskinny": 22877, "Ġmaj": 22878, "Ġwhisk": 22879, "Ġcongreg": 22880, "RAL": 22881, "Ġvolley": 22882, "Ġestablishments": 22883, "Ġcite": 22884, "Miss": 22885, "Int": 22886, "iola": 22887, "ĠBare": 22888, "KING": 22889, "ools": 22890, "private": 22891, "Ġflaw": 22892, "Ġwires": 22893, "Ġideals": 22894, "oub": 22895, "Ġ\"'": 22896, "ĠCompet": 22897, "ĠStatements": 22898, "ĠHDR": 22899, "rm": 22900, "Ġbegging": 22901, "uffs": 22902, "Ġdispatch": 22903, "Ġskipped": 22904, "Ġlabs": 22905, "hawks": 22906, "Ġexpl": 22907, "Ġpatriotic": 22908, "ussions": 22909, "Ġportrayal": 22910, "ĠBudapest": 22911, "ĠCod": 22912, "Ġextingu": 22913, "smart": 22914, "Ġburdens": 22915, "ĠDrama": 22916, "Ġaltitude": 22917, "Ġpursuant": 22918, "à¥": 22919, "atari": 22920, "cot": 22921, "Ġhotline": 22922, "ooters": 22923, "ĠRolls": 22924, "Ġjeopardy": 22925, "oids": 22926, "Ġpageant": 22927, "149": 22928, "Ġdistinguish": 22929, "support": 22930, "ĠHighlands": 22931, "ĠErnst": 22932, "ĠHole": 22933, "pering": 22934, "ĠHasan": 22935, "Ġrece": 22936, "Ġirregular": 22937, "Ġdisturbed": 22938, "Ġcoupon": 22939, "ĠElijah": 22940, "oise": 22941, "Ġfriendships": 22942, "girlfriend": 22943, "Ġrampage": 22944, "arers": 22945, "Ġdispens": 22946, "assion": 22947, "Ġtentative": 22948, "ĠExploration": 22949, "fashioned": 22950, "ĠInstit": 22951, "Ġthemed": 22952, "ĠKurdistan": 22953, "ĠCAL": 22954, "ĠSweeney": 22955, "Ġransom": 22956, "Ġstamps": 22957, "ĠSchwe": 22958, "ĠLucia": 22959, "124": 22960, "omore": 22961, "Ġmotivate": 22962, "ĠWorcester": 22963, "wald": 22964, "CAR": 22965, "iken": 22966, "andro": 22967, "ffic": 22968, "ĠRehab": 22969, "Ġgrou": 22970, "Ġcontrollers": 22971, "ĠHai": 22972, "nz": 22973, "Ġartillery": 22974, "ĠMish": 22975, "Ġregistry": 22976, "Ġfrontman": 22977, "ĠCharg": 22978, "orneys": 22979, "ĠPRESS": 22980, "Ġperceptions": 22981, "ĠMcGee": 22982, "AU": 22983, "mg": 22984, "Off": 22985, "ĠNGOs": 22986, "chemical": 22987, "Ġbrun": 22988, "ĠHav": 22989, "Ġlace": 22990, "Ġ202": 22991, "Ġdefer": 22992, "Ġinjected": 22993, "Ġgluten": 22994, "ĠRin": 22995, "ĠAvalanche": 22996, "Ġcorpor": 22997, "ĠPamela": 22998, "Ġfills": 22999, "ĠReve": 23000, "ĠMonument": 23001, "Ġnationalists": 23002, "ĠIQ": 23003, "adden": 23004, "ĠLoop": 23005, "Ġ134": 23006, "Reg": 23007, "click": 23008, "bush": 23009, "ĠKub": 23010, "ipes": 23011, "Ġtoggle": 23012, "ĠRae": 23013, "Ġburgl": 23014, "Ġholistic": 23015, "ronics": 23016, "Ġprominence": 23017, "jack": 23018, "Ġfinan": 23019, "icates": 23020, "Ġvel": 23021, "important": 23022, "Thursday": 23023, "chet": 23024, "Ġrefunds": 23025, "ĠElder": 23026, "ĠOwner": 23027, "Ġtakeaway": 23028, "Pe": 23029, "ĠToro": 23030, "Tim": 23031, "fix": 23032, "before": 23033, "ĠMotorola": 23034, "Ġlev": 23035, "Term": 23036, "ĠSne": 23037, "Ġmisinformation": 23038, "ĠSinai": 23039, "Ġnitrogen": 23040, "Ġ203": 23041, "Ġescaping": 23042, "Ġjunction": 23043, "ĠSantana": 23044, "ĠYemeni": 23045, "Ġwhipped": 23046, "ĠStephenson": 23047, "Ġattire": 23048, "ĠBard": 23049, "atically": 23050, "ĠFaul": 23051, "ĠSym": 23052, "resh": 23053, "ĠMG": 23054, "Sub": 23055, "ĠCarmen": 23056, "Ġig": 23057, "ĠSanford": 23058, "ĠYa": 23059, "cycle": 23060, "Ġencryption": 23061, "ĠScal": 23062, "ĠChest": 23063, "ĠMadonna": 23064, "agin": 23065, "ĠDHS": 23066, "ĠCed": 23067, "YR": 23068, "Ġtruce": 23069, "ĠBike": 23070, "Ġfoes": 23071, "ĠSlovakia": 23072, "adal": 23073, "Rain": 23074, "OPE": 23075, "Ġlockdown": 23076, "Ġunilateral": 23077, "Ġoverseen": 23078, "Ġblames": 23079, "Ġbarrage": 23080, "aan": 23081, "uds": 23082, "ĠRust": 23083, "ĠHC": 23084, "cox": 23085, "ĠAllied": 23086, "ĠJosÃ©": 23087, "pected": 23088, "Ġunp": 23089, "Ġsomeday": 23090, "Ġdeductions": 23091, "icial": 23092, "ĠPRO": 23093, "ĠIntern": 23094, "Ġhemp": 23095, "Ġkilograms": 23096, "Ġnets": 23097, "ĠBACK": 23098, "early": 23099, "outed": 23100, "Ġrelegated": 23101, "Ġ1958": 23102, "ĠMustang": 23103, "Ġgamble": 23104, "Ġprostitution": 23105, "ĠPapa": 23106, "Ġinexpensive": 23107, "GHz": 23108, "Ġjerseys": 23109, "Ġmisery": 23110, "VIS": 23111, "ĠRAW": 23112, "Ġthri": 23113, "Ġaffiliation": 23114, "small": 23115, "Ġflashed": 23116, "Ġcoastline": 23117, "Ġgard": 23118, "Ġsv": 23119, "Ġwaits": 23120, "itton": 23121, "London": 23122, "Ġaccus": 23123, "ĠCharge": 23124, "Ġincub": 23125, "Ġwanna": 23126, "ĠAwareness": 23127, "abies": 23128, "ĠUh": 23129, "Ġpersuaded": 23130, "ĠThames": 23131, "Ġcurated": 23132, "Ī": 23133, "Ġbrutally": 23134, "Ġrooftop": 23135, "Ġoy": 23136, "Ġ1900": 23137, "bery": 23138, "Ġuphill": 23139, "Ġinteracting": 23140, "Ġchilly": 23141, "ERE": 23142, "Ġcapsule": 23143, "ĠSaul": 23144, "ocker": 23145, "Ġdeserving": 23146, "ĠBowen": 23147, "ĠReaders": 23148, "ĠWriters": 23149, "Ġartifacts": 23150, "ĠRanger": 23151, "reau": 23152, "Ġimperson": 23153, "Ġhears": 23154, "ĠMaher": 23155, "neg": 23156, "Ġmantra": 23157, "Ġmull": 23158, "Ġelders": 23159, "ĠAmtrak": 23160, "Ġspouses": 23161, "ĠHak": 23162, "Ġopenness": 23163, "Ġprevailed": 23164, "Ġfortnight": 23165, "Pal": 23166, "ride": 23167, "Ġillustrate": 23168, "dominated": 23169, "trust": 23170, "ī": 23171, "ĠFemale": 23172, "ĠSlim": 23173, "Ġdesc": 23174, "ĠKathryn": 23175, "Ġdeepen": 23176, "TAIN": 23177, "eredith": 23178, "Ġchanted": 23179, "ĠHector": 23180, "bread": 23181, "ĠIsa": 23182, "Ġvolcanic": 23183, "Ġah": 23184, "owners": 23185, "aquin": 23186, "Ġmelting": 23187, "Ġpreschool": 23188, "ocus": 23189, "ĠMast": 23190, "ĠMyr": 23191, "Ġsuppress": 23192, "Ġversatility": 23193, "ĠNEC": 23194, "Ġhoax": 23195, "Ġmutually": 23196, "ĠNeb": 23197, "ĠWheel": 23198, "kit": 23199, "abl": 23200, "again": 23201, "ĠSonny": 23202, "rift": 23203, "Ġsweater": 23204, "Ġinund": 23205, "ĠTaco": 23206, "ĠBout": 23207, "Ġnonprofits": 23208, "Ġmodify": 23209, "Ġprofessionalism": 23210, "ĠGould": 23211, "ĠGuerrero": 23212, "Ġterribly": 23213, "ĠBenz": 23214, "Ġcountered": 23215, "Ġbean": 23216, "ĠPhelps": 23217, "Ġprowess": 23218, "bc": 23219, "Ġfeast": 23220, "Ġ5000": 23221, "Ġrevisit": 23222, "Ġchin": 23223, "agent": 23224, "Ġtones": 23225, "Ġextraction": 23226, "ĠPosts": 23227, "oin": 23228, "Ġattain": 23229, "Ġgardening": 23230, "earned": 23231, "ĠOtto": 23232, "player": 23233, "Ġscams": 23234, "ĠHonolulu": 23235, "ĠAppro": 23236, "ĠHIGH": 23237, "Ġdwell": 23238, "Islam": 23239, "leaders": 23240, "Ġlegisl": 23241, "expl": 23242, "ĠChoi": 23243, "Ġfrenzy": 23244, "Ġcommercially": 23245, "Ġlbs": 23246, "Ġgateway": 23247, "ĠAndersen": 23248, "emia": 23249, "lez": 23250, "Ġresidences": 23251, "office": 23252, "ĠHelsinki": 23253, "olia": 23254, "Ġwolf": 23255, "Ġstyling": 23256, "ĠJunction": 23257, "ĠPeyton": 23258, "udo": 23259, "ĠDorothy": 23260, "Ġfreshly": 23261, "ĠJulio": 23262, "ĠSunset": 23263, "ĠMadden": 23264, "Ġissu": 23265, "Ġsounding": 23266, "sports": 23267, "Ġmassively": 23268, "ĠRahman": 23269, "Ġpresided": 23270, "Instead": 23271, "Ġ136": 23272, "ĠHowell": 23273, "beit": 23274, "Ġprosperous": 23275, "Ġwrongly": 23276, "ĠRaqqa": 23277, "ĠCes": 23278, "Ġbuddy": 23279, "Ġchatting": 23280, "Ġfencing": 23281, "Ġtant": 23282, "ocated": 23283, "ALK": 23284, "Ġsnapping": 23285, "euro": 23286, "Ryan": 23287, "ĠRecogn": 23288, "ucked": 23289, "Ġpurported": 23290, "ĠCann": 23291, "Ġintimidating": 23292, "Ġrulers": 23293, "ĠMarse": 23294, "Art": 23295, "ĠAadhaar": 23296, "Ġvows": 23297, "Ġhunter": 23298, "ourmet": 23299, "ĠVarious": 23300, "2009": 23301, "anie": 23302, "Ġcompassionate": 23303, "ĠParking": 23304, "Ġmalaria": 23305, "Ġamnesty": 23306, "Ġworsened": 23307, "ĠTitan": 23308, "Ġcrossings": 23309, "drug": 23310, "Ġaddicted": 23311, "Ġremorse": 23312, "ĠDestiny": 23313, "Dear": 23314, "Ġhur": 23315, "Ġimplicated": 23316, "Ġplayful": 23317, "Ġripe": 23318, "Ġsizable": 23319, "Ġcrab": 23320, "Ġliqu": 23321, "Ġdrib": 23322, "Ġcontraction": 23323, "cro": 23324, "ĠGus": 23325, "Ġdoomed": 23326, "Ġmog": 23327, "ĠMonitor": 23328, "Count": 23329, "Ġsadd": 23330, "Ġwrestler": 23331, "Ġrestraints": 23332, "Ġraging": 23333, "185": 23334, "Ġtapes": 23335, "Ġmitigation": 23336, "ocratic": 23337, "Ġvib": 23338, "ĠSnowden": 23339, "aldo": 23340, "Ġweights": 23341, "Ġ1959": 23342, "ucc": 23343, "ĠCoc": 23344, "Log": 23345, "ĠStev": 23346, "Ġdealership": 23347, "Ġtrademarks": 23348, "iru": 23349, "Ġbeneficiary": 23350, "Ġlegislator": 23351, "Ġdeadlines": 23352, "Ġcosmetics": 23353, "ĠTammy": 23354, "ĠCombined": 23355, "Ġeducator": 23356, "athon": 23357, "Ġcombo": 23358, "fu": 23359, "appropriate": 23360, "nington": 23361, "ĠLiberties": 23362, "missions": 23363, "opard": 23364, "ĠMondays": 23365, "Ġfetch": 23366, "Ġhers": 23367, "jon": 23368, "ukes": 23369, "zek": 23370, "Ġvetting": 23371, "yet": 23372, "Ġfacilitating": 23373, "ĠStras": 23374, "character": 23375, "ĠHeads": 23376, "Ġclim": 23377, "ĠAlbuquerque": 23378, "Ġbind": 23379, "Ġconcluding": 23380, "ĠBasically": 23381, "rail": 23382, "ĠTCU": 23383, "ĠDepression": 23384, "Ġhem": 23385, "ĠHue": 23386, "Ġpand": 23387, "Ġscoreboard": 23388, "Av": 23389, "Ġidol": 23390, "compl": 23391, "Ġredesign": 23392, "ĠJarrett": 23393, "Ġfavoured": 23394, "ĠINS": 23395, "Ġpropelled": 23396, "Ġevasion": 23397, "Ġwidened": 23398, "Ġwastewater": 23399, "nard": 23400, "responsive": 23401, "Ġdemographics": 23402, "engine": 23403, "ĠBrewer": 23404, "ĠBaxter": 23405, "ront": 23406, "ĠColon": 23407, "Ġpromoter": 23408, "Ġgenres": 23409, "ovsky": 23410, "build": 23411, "urate": 23412, "ĠCohn": 23413, "design": 23414, "Ġturbulent": 23415, "Ġcurtain": 23416, "310": 23417, "ĠLamp": 23418, "ĠBonds": 23419, "church": 23420, "Ġdeterrent": 23421, "Ġdictatorship": 23422, "acement": 23423, "haul": 23424, "Ġspir": 23425, "Ġconceived": 23426, "Ġstern": 23427, "sit": 23428, "Ġsingular": 23429, "ĠYog": 23430, "Ġconditional": 23431, "Ġide": 23432, "lund": 23433, "Ġautop": 23434, "ĠBEST": 23435, "ĠJed": 23436, "Ġrationale": 23437, "Ġalarmed": 23438, "Ġshovel": 23439, "ĠProb": 23440, "ĠMao": 23441, "ĠBurgess": 23442, "Ġ1953": 23443, "above": 23444, "ĠManson": 23445, "Ġdismal": 23446, "ĠFrankie": 23447, "Ġtempted": 23448, "Ġunderdog": 23449, "ribing": 23450, "ENCY": 23451, "ĠDele": 23452, "Las": 23453, "places": 23454, "Ġnotoriously": 23455, "ĠAkin": 23456, "Ġglut": 23457, "Ġseamlessly": 23458, "Ġrecess": 23459, "written": 23460, "ĠTJ": 23461, "occ": 23462, "ĠTerritory": 23463, "ĠAIR": 23464, "ĠDiagn": 23465, "Ġvacancies": 23466, "Ġcultivation": 23467, "ĠAless": 23468, "Ġrenamed": 23469, "ĠMahmoud": 23470, "bright": 23471, "Ġvisibly": 23472, "Ġnas": 23473, "erred": 23474, "ĠCarn": 23475, "Ġtriggers": 23476, "Ġpunishing": 23477, "Ġluc": 23478, "ĠBett": 23479, "Ġbeam": 23480, "ĠCheng": 23481, "aina": 23482, "Ġdetermines": 23483, "ĠGerry": 23484, "Ġshocks": 23485, "Ġstainless": 23486, "Ġdefects": 23487, "ĠCinem": 23488, "Ġtorrent": 23489, "Ġresurgence": 23490, "Ġcoral": 23491, "Ġblitz": 23492, "ĠGel": 23493, "Ġstemmed": 23494, "gur": 23495, "Ġlymph": 23496, "zzo": 23497, "Ġspearheaded": 23498, "Ġlicences": 23499, "';": 23500, "Ġarbitrary": 23501, "ĠUzbek": 23502, "Ġthief": 23503, "reaching": 23504, "Ġcand": 23505, "ĠEA": 23506, "ĠParaly": 23507, "ĠEmerson": 23508, "ĠSergey": 23509, "ĠScher": 23510, "ĠWr": 23511, "rowing": 23512, "Ġ3000": 23513, "Ġmighty": 23514, "elight": 23515, "mAh": 23516, "Ġcelebr": 23517, "ĠConclusion": 23518, "ĠCathy": 23519, "Ġpolished": 23520, "uddled": 23521, "ewski": 23522, "Ġfucking": 23523, "Ġinterfering": 23524, "Ġlandscapes": 23525, "Ġfearful": 23526, "ĠDetention": 23527, "%).": 23528, "ĠTT": 23529, "Ġbleak": 23530, "Ġindebted": 23531, "Ġcheat": 23532, "Ġconsolation": 23533, "ĠPace": 23534, "raine": 23535, "Ġhonorary": 23536, "420": 23537, "Ġtechnician": 23538, "ĠComprehensive": 23539, "Ġfences": 23540, "Ġwearable": 23541, "ĠMarilyn": 23542, "stru": 23543, "Ġdrained": 23544, "ĠGibraltar": 23545, "lag": 23546, "Ġdisorderly": 23547, "Ġproclaimed": 23548, "Ġcapacities": 23549, "Ġretains": 23550, "ĠVid": 23551, "oshi": 23552, "ĠEid": 23553, "Ġanalytical": 23554, "ominium": 23555, "ĠExaminer": 23556, "ĠNAACP": 23557, "ocol": 23558, "rev": 23559, "ĠRim": 23560, "ĠWoody": 23561, "ĠMcKenna": 23562, "ĠLennon": 23563, "ĠEmploy": 23564, "Fort": 23565, "psy": 23566, "Ġsphere": 23567, "oday": 23568, "ĠChick": 23569, "ĠCompared": 23570, "ĠIranians": 23571, "ĠAccountability": 23572, "itchie": 23573, "ĠDickinson": 23574, "Ġflock": 23575, "Ġeclips": 23576, "Ġnat": 23577, "anke": 23578, "ĠNeighborhood": 23579, "Ġ141": 23580, "Ġscarce": 23581, "Ġcreations": 23582, "lists": 23583, "Ġuseless": 23584, "Ġcriticisms": 23585, "Ġruler": 23586, "ĠHi
[truncated: 462,914 more chars]
