# Supplementary material
Source: ML conference proceedings conference paper supplement (https://aclanthology.org/2021.findings-acl.166)
Supplement: OptionalSupplementaryMaterial [file 2021.findings-acl.166.OptionalSupplementaryMaterial.zip › acl_supplement/software/LSTM.ipynb]

# %% [code]
pip install torchtext==0.5.0

# %% [code]
pip install torchtext

# %% [code]
pip show torchtext

# %% [code]
pip install ekphrasis

# %% [code]
import pandas as pd
import os
import numpy as np
import torch

from torch import nn, optim
from torchtext.data import Field, Dataset, Example, BucketIterator, Iterator, TabularDataset
from tqdm import tqdm, trange

# %% [markdown]
### The two cells below are for manually importing the helper functions

# %% [code]
import matplotlib.pyplot as plt
% matplotlib inline
import seaborn as sns
import pandas as pd
import numpy as np
import tensorflow as tf
import shutil 
import os

from sklearn.metrics import matthews_corrcoef, confusion_matrix, precision_score, recall_score, f1_score, accuracy_score
from sklearn.utils import shuffle
from sklearn.model_selection import train_test_split
from ekphrasis.classes.preprocessor import TextPreProcessor
from ekphrasis.classes.tokenizer import SocialTokenizer
from ekphrasis.dicts.emoticons import emoticons
from tensorflow import keras


# %% [code]
def clean_text(data, normalize_list, annotate_list):
        """
        This function preprocesses the text using the Ekphrasis library
        
        data: Pandas series object containing strings of text

        normalize_list: list of data features to clean

        annotate_list: list of data features to annotate
        """

        text_processor = TextPreProcessor(
            normalize= normalize_list,
            annotate= annotate_list,
            fix_html=True,
            segmenter="twitter", 
            unpack_hashtags=True,  
            unpack_contractions=True,  
            spell_correct_elong=True,  
            tokenizer=SocialTokenizer(lowercase=True).tokenize,
            dicts=[emoticons]
        )

        clean_data = data.map(lambda x: " ".join(text_processor.pre_process_doc(x)))

        return clean_data


def early_stopping(val_loss_values, early_stop_vals):
    """
    Determines whether or not the model will keep running based on the patience and delta given relative to the val loss
    """
    if len(val_loss_values) > early_stop_vals["patience"]:
      if val_loss_values[-1] <= np.mean(np.array(val_loss_values[-1-early_stop_vals["patience"]:-1])) - early_stop_vals["delta"]:
        return False
      else:
        return True
    else:
      return False


def training_plot(train_loss_values, val_loss_values):
    """
    Plots loss after each epoch

    training_loss_values: list of floats; output from fine_tune function

    val_loss_values: list of floats; output from fine_tune function
    """
    sns.set(style='darkgrid')
    plt.rcParams["figure.figsize"] = (12,6)

    plt.plot(train_loss_values, 'b-o', label="train")
    plt.plot(val_loss_values, 'g-o', label="valid")

    #plt.title("Training and Validation loss")
    plt.xlabel("Epoch")
    plt.ylabel("Loss")
    plt.legend()

    #plt.savefig("dogwhistle_train_plot.png",bbox_inches='tight')

    return plt.show()


def metrics(labels, preds, argmax_needed: bool = False):
    """
    Returns the Matthew's correlation coefficient, accuracy rate, true positive rate, true negative rate, false positive rate, false negative rate, precission, recall, and f1 score
    
    labels: list of correct labels

    pred: list of model predictions
    """
    labels = labels
    preds = preds

    if argmax_needed == True:
        preds = np.argmax(preds, axis=1).flatten()

    mcc = matthews_corrcoef(labels, preds)
    acc = accuracy_score(labels, preds)
    cm = confusion_matrix(labels, preds)

    f1 = f1_score(labels, preds, average= "weighted")
    precision = precision_score(labels, preds, average= "weighted")
    recall = recall_score(labels, preds, average= "weighted")

    results = {
        "mcc": mcc,
        "acc": acc,
        "confusion_matrix": cm,
        "precision": precision,
        "recall": recall,
        "f1": f1,
    }
    
    return results, labels, preds


def model_saver(model, model_type, output_directory, training_dict, labels, preds, ids, results, tokenizer= None):
    """
    Saves PyTorch Model and other outputs

    model: Model to be saved
    
    model_type (string): Name of model
    
    output_directory: Directory to folder to save file in

    training_dict: Dictionary of training and validation values 

    labels: List of labels for test set

    preds: List of model predictions after passed through argmax()

    ids: List of tweet ids

    results: Dictionary of metrics

    tokenizer: Tokenizer to be saved. Defaulted to None.
    """

    output_directory = os.path.join(output_directory, model_type)
    
    if not os.path.exists(output_directory):
        os.makedirs(output_directory)

    os.chdir(output_directory)

    np.save(model_type+"_dogwhistle_train_results.npy", training_dict) #save training dict
    np.save(model_type+"_dogwhistle_test_results.npy", results) #save test metrics
    
    test_predictions = pd.DataFrame([labels, preds, ids]) #save predictions, labels, and ids
    test_predictions = test_predictions.T
    test_predictions = test_predictions.rename(columns={0: "Labels", 1: 'Predictions', 2: 'image_number'})
    test_predictions.to_csv(model_type+"_dogwhistle_predictions.csv")

    #save models
    torch.save(model.state_dict(), model_type+"_model")

    return print("Saving complete.")


def confusion_matrix_plotter(results, save_name, x_tick_labels, y_tick_labels, color):
    """
    Plots confusion matrix

    results: dictionary item containing key of confusion matrix (output of sklearn confusion_matrix())

    x_tick_labels: list of tick labels on x axis

    y_tick_labels: list of tick labels on y axis

    save_name: name of image to be produced with .png

    color: color selection from matplotlib cmap choices: https://matplotlib.org/3.1.0/tutorials/colors/colormaps.html
    """

    df_cm = pd.DataFrame(results.ravel()[0]["confusion_matrix"])

    fig = plt.figure(figsize=(16, 12))
    
    plt.rc('axes', labelsize=14)  
    plt.rc('xtick', labelsize=12)   
    plt.rc('ytick', labelsize=12)       

    #plt.subplot(2, 2, 1)
    g1 = sns.heatmap(df_cm, annot=True, fmt='g', cmap=color)
    g1.set_xlabel('Predicted Label')
    g1.set_ylabel('True Label', rotation=0) 
    g1.xaxis.set_ticklabels(x_tick_labels, rotation=0) 
    g1.yaxis.set_ticklabels(y_tick_labels, rotation=0) 

    plt.show()

    return fig.savefig(save_name,bbox_inches='tight')


def combine_text(df):
    """
    Combines tweet and image text into one column

    df: Dataframe which holds the data
    """
    combined_text = []

    for row_num in range(len(df)):
        tweet_text = df.loc[row_num, "tweet_text"]
        image_text = df.loc[row_num, "img_text"]
        if type(image_text) == str:
            combined_text.append(tweet_text + image_text)
        else:
            combined_text.append(tweet_text)

    return combined_text


# %% [markdown]
### Prepare Data

# %% [code]
NORMALIZE_LIST = ['url', 'email', 'percent', 'money', 'phone', 'user', 'time', 'date', 'number']
ANNOTATE_LIST = ['hashtag', 'allcaps', 'elongated', 'repeated', 'emphasis', 'censored']


# Load data
train = pd.read_csv("/content/drive/My Drive/Dog_Whistle_Code/Data/Train/dog_whistle_train.csv", encoding='utf-8')
dev = pd.read_csv("/content/drive/My Drive/Dog_Whistle_Code/Data/Validation/dog_whistle_dev.csv", encoding='utf-8')
test = pd.read_csv("/content/drive/My Drive/Dog_Whistle_Code/Data/Test/dog_whistle_test.csv", encoding='utf-8')

# Combine Image and Tweet Text
train["text"] = combine_text(train)
dev["text"] = combine_text(dev)
test["text"] = combine_text(test)

# Clean data
train["text"] = clean_text(train["text"], NORMALIZE_LIST, ANNOTATE_LIST)
dev["text"] = clean_text(dev["text"], NORMALIZE_LIST, ANNOTATE_LIST)
test["text"] = clean_text(test["text"], NORMALIZE_LIST, ANNOTATE_LIST)

# Rename label column 
train["labels"] = train["Unimodal_text_numeric"]
dev["labels"] = dev["Unimodal_text_numeric"]
test["labels"] = test["Primary_numeric_gt"]

# Subset with necessary data
train_use = train[["text", "labels", "image_number"]]
dev_use = dev[["text", "labels", "image_number"]]
test_use = test[["text", "labels", "image_number"]]

# Define fields
TEXT = Field(sequential=True, tokenize="spacy", include_lengths=True) 
LABEL = Field(sequential=False, use_vocab=False)
IDS = Field(sequential=False, use_vocab=False)
fields = [('text', TEXT), ('labels', LABEL), ('image_number', IDS)] 

# Create datasets
train_set = Dataset([Example.fromlist(i, fields) for i in train_use.values.tolist()], fields=fields)
dev_set = Dataset([Example.fromlist(i, fields) for i in dev_use.values.tolist()], fields=fields)
test_set = Dataset([Example.fromlist(i, fields) for i in test_use.values.tolist()], fields=fields)

# Get training words and pretrained vectors (training words without vectors are initialized randomly)
TEXT.build_vocab(train_set, vectors='fasttext.simple.300d', unk_init=torch.Tensor.normal_)

# %% [code]
test_use[test_use["image_number"]==1107753891452645377]

# %% [markdown]
## Model Setup

# %% [code]
class LSTMClassifier(nn.Module):
    def __init__(self, train, dev, test, pad_id, input_dim: int, embedding_dim: int=300, hidden_dim: int=256, output_dim: int=4, n_layers: int=2, dropout: float=0.2, bidirectional: bool=True, batch_size: int=64):
        """
        train: dataset object of training data

        dev: dataset object of dev data

        test: dataset object of test data
        
        pad_id: pads output with embedding vector
        
        input_dim (int): length of text
        
        embedding_dim (int): number of embedding dimensions defaulted to 300
        
        hidden_dim (int): number of hidden nodes defaulted to 256
        
        output_dim (int): number of labels in classification task defaulted to 2
        
        n_layers (int): number of recurrent layers defaulted to 2
        
        dropout (float): percent on nodes turned off during training defaulted to 0.2

        bidirectional (boolean): whether bidirectional layers will be added, defaulted to True

        batch_size (int): size of mini batches
        """
        
        super(LSTMClassifier, self).__init__()
        self.device = torch.device('cuda' if torch.cuda.is_available() else 'cpu')
        self.train_iter, self.dev_iter, self.test_iter = BucketIterator.splits((train, dev, test), 
                                                                                batch_size=batch_size, 
                                                                                device=self.device, 
                                                                                sort_key=lambda x: len(x.text), 
                                                                                sort_within_batch=True
                                                                                )

        self.output_dim = output_dim
        self.embedding = nn.Embedding(input_dim, embedding_dim, padding_idx=pad_id)
        self.lstm = nn.LSTM(embedding_dim, hidden_dim, num_layers=n_layers, bidirectional=bidirectional, dropout=dropout, batch_first=True)
        self.fc = nn.Linear(hidden_dim * 2, output_dim)
        self.sig = nn.Sigmoid()


    def forward(self, text, lengths):
        """
        This function sets up the model's foward pass

        Initiates forward pass of data
        
        text: vector representation of text string
        
        lengths: second element in bucket iterator
        """

        embedded = self.embedding(text)
        packed_embedded = nn.utils.rnn.pack_padded_sequence(embedded, lengths) #,batch_first=True)
        packed_output, (hidden, cell) = self.lstm(packed_embedded)
        hidden = torch.cat((hidden[-2,:,:], hidden[-1,:,:]), dim = 1)
        outputs=self.fc(hidden)
        
        return outputs
      
    
    def trainer(self, model, learning_rate: float, early_stop_vals, epochs: int=50):
        """
        This function trains the model

        model: Instantiation of model

        learning_rate (float): determines steps size while minimizing loss function
        
        early_stop_vals: Dictionary containing patience level and minimum improvement delta
        
        epochs (int): Number of training epochs defaulted to 50
        """

        optimizer = optim.AdamW(model.parameters(), lr=learning_rate)
        model = model.to(self.device)
        
        train_scores, train_losses, val_scores, val_losses, = [], [], [], []
        
        for epoch in trange(epochs, desc= "Epoch"):
            print("Processing epoch {}".format(epoch+1))
            if early_stopping(val_losses, early_stop_vals) == False:

                model.train()

                train_acc = 0
                batch_train_losses = []

                for step, batch in enumerate(self.train_iter): # Loop over mini-batches

                    optimizer.zero_grad()

                    text, lengths = batch.text

                    if self.output_dim ==  1:
                        predictions = model(text, lengths).squeeze()
                        criterion = nn.BCELogits().to(self.device)
                        loss = criterion(predictions, batch.labels.to(self.device, dtype=torch.float)) 
                        loss.backward() # Backpropagate loss
                        optimizer.step() # Update weights
                        train_acc += self.binary_accuracy(predictions, batch.labels).item()
                        batch_train_losses.append(loss.tolist())
                    else:
                        predictions = model(text, lengths)
                        criterion = nn.CrossEntropyLoss().to(self.device)
                        loss = criterion(predictions, batch.labels) 
                        loss.backward() # Backpropagate loss
                        optimizer.step() # Update weights
                        train_acc += self.batch_accuracy(predictions, batch.labels).item() 
                        batch_train_losses.append(loss.tolist())


                batch_loss = sum(batch_train_losses)/len(batch_train_losses)
                train_losses.append(batch_loss)
                train_acc /= len(self.train_iter)
                train_scores.append(train_acc)
                print('Accuracy on train data:\t{:.4f}'.format(train_acc))
                model.eval() # Compute accuracy on validation data

                val_acc = 0
                batch_val_losses = []

                with torch.no_grad():

                    for batch in self.dev_iter:

                        text, lengths = batch.text

                        if self.output_dim ==  1:
                            preds = model(text, lengths).squeeze()
                            criterion = nn.BCELogits().to(self.device)
                            loss = criterion(preds, batch.labels.to(self.device, dtype=torch.float)) 
                            batch_val_losses.append(loss.tolist())
                            val_acc += self.binary_accuracy(preds, batch.label).item()
                        else:
                            preds = model(text, lengths)
                            criterion = nn.CrossEntropyLoss().to(self.device)
                            loss = criterion(preds, batch.labels) 
                            batch_val_losses.append(loss.tolist())
                            val_acc += self.batch_accuracy(preds, batch.labels).item()
                        

                batch_loss = sum(batch_val_losses)/len(batch_val_losses)
                print("Batch dev loss: {}".format(batch_loss))
                val_losses.append(batch_loss)
                val_acc /= len(self.dev_iter)
                val_scores.append(val_acc)

                print('Accuracy on dev data:\t{:.4f}'.format(val_acc))
                
                if epoch == (epochs-1):
                    training_plot(train_losses, val_losses)
                    training_dict = {"Train Accuracy": train_scores, "Train Loss": train_losses, "Val Accuracy": val_scores, "Val Loss": val_losses}
                    print("Training complete!")
                    return training_dict
                else:
                    continue
                
            else:
                print("Stopping early...")
                print("Training complete!")
                training_plot(train_losses, val_losses)
                training_dict = {"Train Accuracy": train_scores, "Train Loss": train_losses, "Val Accuracy": val_scores, "Val Loss": val_losses}
                print("Training complete!")
                return training_dict


    def test(self, model):
        """
        This function performs a forward pass on the test data and computes the performance metrics

        model: instantiation of model
        """
        
        model = model.to(self.device)
        model.eval()

        labels = list()
        preds = list()
        ids = list()

        with torch.no_grad():

            for batch in self.test_iter:

                text, lengths = batch.text
                output = model(text, lengths)

                preds.extend([p.item() for p in output.argmax(dim=1, keepdim=True)])
                labels.extend([l.item() for l in batch.labels])
                ids.extend([i.item() for i in batch.image_number])
        
        return metrics(labels, preds), ids


    def batch_accuracy(self, predictions, labels):
        """
        Calculates mean batch accuracy for multiclass data
        
        predictions: model output after forward pass
        
        labels: list of one-hot encoded labels
        """
        
        max_predictions = predictions.argmax(dim=1, keepdim=True)
        correct = max_predictions.squeeze(1).eq(labels)
        
        return correct.sum() / torch.FloatTensor([labels.shape[0]])


    def binary_accuracy(self, predictions, labels):
        """
        Calculates mean batch accuracy for binary data

        predictions: model output after forward pass
          
        labels: list of one-hot encoded labels
        """
        rounded_preds = torch.round(self.sig(predictions))
        
        correct = (rounded_preds == labels).float() 
        acc = correct.sum() / len(correct)
        
        return acc
      

# %% [markdown]
### Run Model

# %% [code]
#define hyperparameters
INPUT_DIM = len(TEXT.vocab)
PAD_ID = TEXT.vocab.stoi[TEXT.pad_token]
UNK_ID = TEXT.vocab.stoi[TEXT.unk_token]
N_EPOCHS = 50
EARLY_STOPPING = {"patience": 10, "delta": 0.01}
LEARNING_RATES = [0.0001, 0.001, 0.01, 0.1, 1]
OUTPUT_DIR = "/content/drive/My Drive/Dog_Whistle_Code/Fine_Tuned_Models/Text"

# %% [code]
results_dict = {}
max_f1_value = 0

for i in LEARNING_RATES:
    # Initialize LSTM model
    model = LSTMClassifier(train_set, dev_set, test_set, PAD_ID, INPUT_DIM)  

    # Load pretrained vector
    model.embedding.weight.data.copy_(TEXT.vocab.vectors) 

    # Manually initialize UNK and PAD tokens as zero vectors (and NOT randomly as would be done otherwise)
    model.embedding.weight.data[UNK_ID] = torch.zeros(300)
    model.embedding.weight.data[PAD_ID] = torch.zeros(300)

    #model test
    train_dict = model.trainer(model, i, EARLY_STOPPING, N_EPOCHS) 
    (results_dict[i], labels, preds), ids = model.test(model)

    if results_dict[i]["f1"] >= max_f1_value: #only save best model
        max_f1_value = results_dict[i]["f1"]
        model_saver(model, "LSTM", OUTPUT_DIR, train_dict, labels, preds, ids, results_dict[i])
        print("The new best learning rate is ", i)

# save complete training results
np.save(os.path.join(OUTPUT_DIR, "LSTM/LSTM_dogwhistle_total_training_results.npy"), results_dict)
df = pd.read_csv("/content/drive/My Drive/Dog_Whistle_Code/Fine_Tuned_Models/Text/LSTM/LSTM_dogwhistle_predictions.csv")
# df["image_number"] = ids
# df.to_csv("/content/drive/My Drive/Dog_Whistle_Code/Fine_Tuned_Models/Text/LSTM/LSTM_dogwhistle_predictions.csv")

# %% [code]
print(labels[:10])
print(ids[:10])

# %% [code]
max_f1_value

# %% [code]
results_dict

# %% [code]
X_TICK_LABELS = ["None", "Hateful", "Counter-speech", "Reclaimed"]
Y_TICK_LABELS = ["None", "Hateful", "Counter-speech", "Reclaimed"]
COLOR = "Blues"
SAVE_NAME = "/content/drive/My Drive/Dog_Whistle_Code/Fine_Tuned_Models/Text/LSTM/LSTM_cm_dogwhistle.png"
CM = np.load("/content/drive/My Drive/Dog_Whistle_Code/Fine_Tuned_Models/Text/LSTM/LSTM_dogwhistle_test_results.npy", allow_pickle=True)

confusion_matrix_plotter(CM, SAVE_NAME, X_TICK_LABELS, Y_TICK_LABELS, COLOR)

# %% [markdown]
### Investigating how datasize effects performance

# %% [code]
NOMARLIZE_LIST = ['url', 'email', 'percent', 'money', 'phone', 'user', 'time', 'date', 'number']
ANNOTATE_LIST = ['hashtag', 'allcaps', 'elongated', 'repeated', 'emphasis', 'censored']


f1_scores = {}

for i in [3500]: #[2000, 2500, 3000]:

    # Load data
    train = pd.read_csv("/content/drive/My Drive/Dog_Whistle_Code/Data/Train/dog_whistle_train.csv", encoding='utf-8')
    train = train[:i]
    dev = pd.read_csv("/content/drive/My Drive/Dog_Whistle_Code/Data/Validation/dog_whistle_dev.csv", encoding='utf-8')
    test = pd.read_csv("/content/drive/My Drive/Dog_Whistle_Code/Data/Test/dog_whistle_test.csv", encoding='utf-8')

    # Combine Image and Tweet Text
    train["text"] = combine_text(train)
    dev["text"] = combine_text(dev)
    test["text"] = combine_text(test)

    # Clean data
    train["text"] = clean_text(train["text"], NOMARLIZE_LIST, ANNOTATE_LIST)
    dev["text"] = clean_text(dev["text"], NOMARLIZE_LIST, ANNOTATE_LIST)
    test["text"] = clean_text(test["text"], NOMARLIZE_LIST, ANNOTATE_LIST)

    # Rename label column 
    train["labels"] = train["Unimodal_text_numeric"]
    dev["labels"] = dev["Unimodal_text_numeric"]
    test["labels"] = test["Primary_numeric_gt"]

    # Subset with necessary data
    train_use = train[["text", "labels", "image_number"]]
    dev_use = dev[["text", "labels", "image_number"]]
    test_use = test[["text", "labels", "image_number"]]

    # Define fields
    TEXT = Field(sequential=True, tokenize="spacy", include_lengths=True) 
    LABEL = Field(sequential=False, use_vocab=False)
    IDS = Field(sequential=False, use_vocab=False)
    fields = [('text', TEXT), ('labels', LABEL), ('image_number', IDS)] 

    # Create datasets
    train_set = Dataset([Example.fromlist(i, fields) for i in train_use.values.tolist()], fields=fields)
    dev_set = Dataset([Example.fromlist(i, fields) for i in dev_use.values.tolist()], fields=fields)
    test_set = Dataset([Example.fromlist(i, fields) for i in test_use.values.tolist()], fields=fields)

    # Get training words and pretrained vectors (training words without vectors are initialized randomly)
    TEXT.build_vocab(train_set, vectors='fasttext.simple.300d', unk_init=torch.Tensor.normal_)

    INPUT_DIM = len(TEXT.vocab)
    PAD_ID = TEXT.vocab.stoi[TEXT.pad_token]
    UNK_ID = TEXT.vocab.stoi[TEXT.unk_token]

    # Initialize LSTM model
    model = LSTMClassifier(train_set, dev_set, test_set, PAD_ID, INPUT_DIM)  

    # Load pretrained vector
    model.embedding.weight.data.copy_(TEXT.vocab.vectors) 

    # Manually initialize UNK and PAD tokens as zero vectors (and NOT randomly as would be done otherwise)
    model.embedding.weight.data[UNK_ID] = torch.zeros(300)
    model.embedding.weight.data[PAD_ID] = torch.zeros(300)

    #model test
    train_dict = model.trainer(model, 0.0001, {"patience": 10, "delta": 0.01}, 50) 
    (results_dict, _, preds), ids = model.test(model)

    df = pd.DataFrame([preds, ids]).T
    df = df.rename(columns= {0: "Predictions", 1: "image_number"})

    f1_scores[i] = results_dict["f1"]


    test = pd.read_csv("/content/drive/My Drive/Dog_Whistle_Code/Data/Test/dog_whistle_test.csv", encoding='utf-8')
    test = pd.merge(test, df, on="image_number")


    dw_df = test[test["Strategies_numeric_gt"] == 2]
    dw_results, _, _ = metrics(dw_df["Primary_numeric_gt"], dw_df["Predictions"])
    print(dw_results)

    explicit_df = test[test["Strategies_numeric_gt"] == 1]
    explicit_results, _, _ = metrics(explicit_df["Primary_numeric_gt"], explicit_df["Predictions"])
    print(explicit_results)

    none_df = test[test["Strategies_numeric_gt"] == 0]
    none_results, _, _ = metrics(none_df["Primary_numeric_gt"], none_df["Predictions"])
    print(none_results)


print(f1_scores)
#np.save(os.path.join("/content/drive/My Drive/Dog_Whistle_Code/Fine_Tuned_Models/Text/LSTM/LSTM_datasize_results.npy"), f1_scores)
