# Supplementary material
Source: ML conference proceedings conference paper supplement (https://aclanthology.org/2021.findings-acl.166)
Supplement: OptionalSupplementaryMaterial [file 2021.findings-acl.166.OptionalSupplementaryMaterial.zip › acl_supplement/software/requirements.txt]

ekphrasis
torchtext==0.5.0
import-ipynb
numpy
torch
tqdm
matplotlib
seaborn
pandas
tensorflow
shutil
os
sklearn
keras
functools
operator
collections
transformers
