# Supplementary material
Source: ML conference proceedings conference paper supplement (https://aclanthology.org/2021.findings-acl.166)

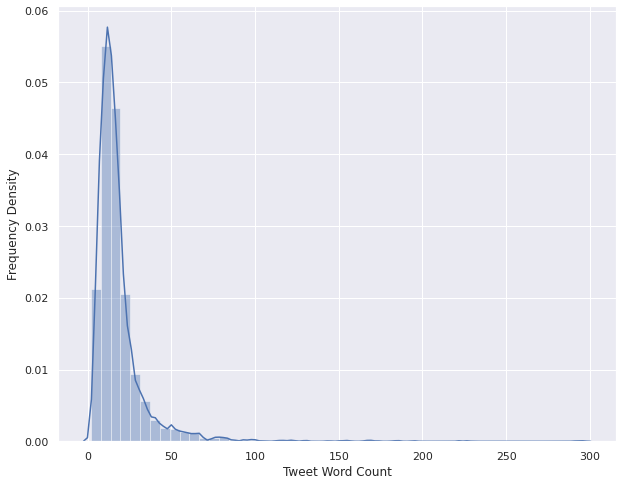

Supplement: OptionalSupplementaryMaterial [file 2021.findings-acl.166.OptionalSupplementaryMaterial.zip › acl_supplement/data/Results/Text/BERT/tweet_length_distribution.png]

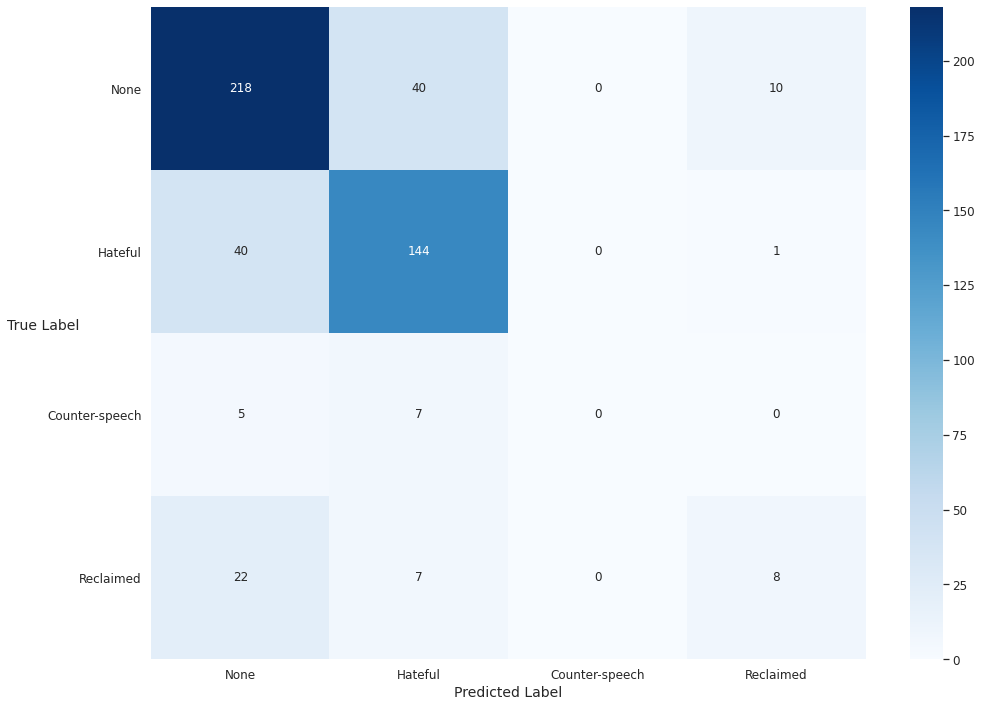

Supplement: OptionalSupplementaryMaterial [file 2021.findings-acl.166.OptionalSupplementaryMaterial.zip › acl_supplement/data/Results/Text/LSTM/LSTM_cm_dogwhistle.png]

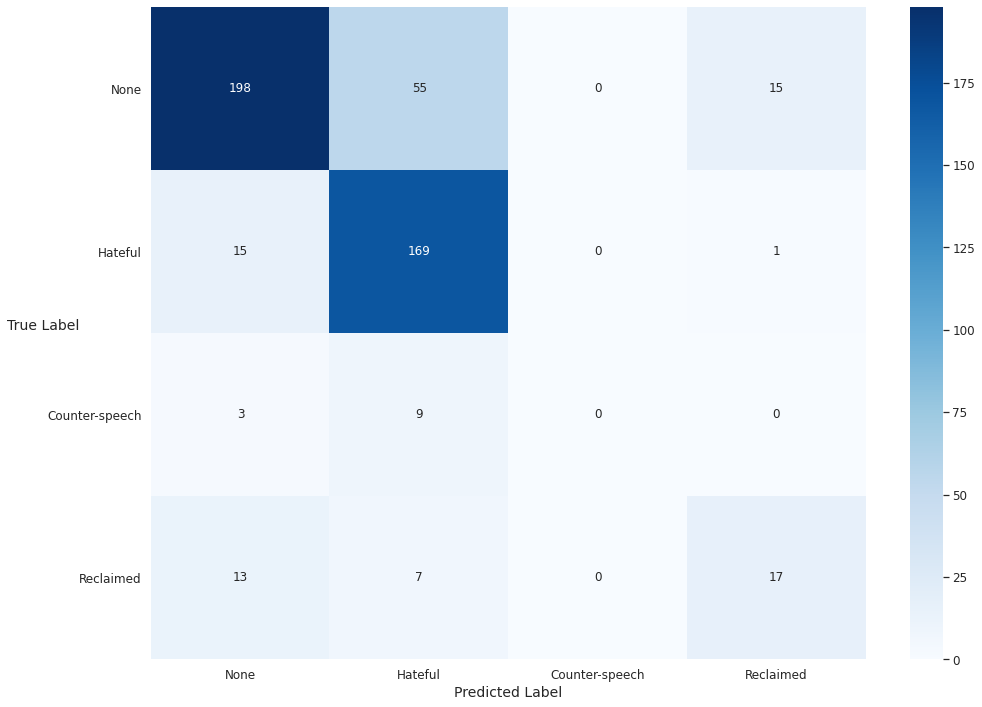

Supplement: OptionalSupplementaryMaterial [file 2021.findings-acl.166.OptionalSupplementaryMaterial.zip › acl_supplement/data/Results/Text/RoBERTa/RoBERTa_cm_dogwhistle.png]
